# Supplementary material for: Aberrant LncRNA Expression Profile in a Contusion Spinal Cord Injury Mouse Model
Source: Biomed Res Int. 2016 Sep 4;2016:9249401. doi: 10.1155/2016/9249401 (PMC5027055; doi:10.1155/2016/9249401)
Supplement: Supplementary file 1 — S1 license pdf: The License Awarded by Soochow University. Table S1: Differential Expression of LncRNAs and Annotation. Table S2: Differential Expression of mRNAs and Annotation. Table S3: mRNAs STC Increase or Decrease. Table S4: LncRNAs STC Increase or Decrease. Table S5: The Significant GO Terms for Differentially Expressed. Table S6: The Significant Pathways of Differentially Expressed Genes. Table S7: The Quantity of the mRNA and LncRNA Network. S1 Fig: The dynamic network between LncRNAs and mRNAs. In this map, the circles with a green line represented LncRNAs, and the other circles represented mRNA. The lines between circles indicated regulation between these genes. The size of the circles indicated the ability of interaction between the genes. This ability was quantified by the degree, which was defined as the connective number between genes. The color was in accordance with the results of the clustering analysis, which was defined as the K-core. The same K-core indicated the similarity and correlation of function between genes. The red color representing the maximal K-core indicated the strongest regulation level in this network. [file 9249401.f1.zip › S1 Table.xls]

## Sheet: the description of sheet 1
The name of table	Header	The description of header
Differential expression of LncRNAs and annotation	lncRNA_probeset_id	LncRNA ID at microarray
	xiaoshujisuiRNA-od_(MoEx-1_0-st-v1)-Signal	Signal value of control group by log2 transformation
	xiaoshujisuiRNA-1d_(MoEx-1_0-st-v1)-Signal	Signal value of 1 day post-injured group by log2 transformation
	xiaoshujisuiRNA-3d_(MoEx-1_0-st-v1)-Signal	Signal value of 3 days post-injured group by log2 transformation
	xiaoshujisuiRNA-1w_(MoEx-1_0-st-v1)-Signal	Signal value of 1 week post-injured group by log2 transformation
	xiaoshujisuiRNA-3w_(MoEx-1_0-st-v1)-Signal	Signal value of 3 weeks post-injured group by log2 transformation
	probeset_id	Probe ID at microarray
	probeset_length	Length of the probe
	lncRNA_id	LncRNA ID correspond with probe
	lncRNA_length	Length of LncRNA
	lncRNA_description	The description of LncRNA
	database	The source database of LncRNA
	gene name	Gene name
	chr	Chromosome
	start	Start point
	end	End point
	strand	Positive-sense strand and negative-sense strand
	sequence	The sequence of probe

## Sheet: sheet 1
lncRNA_probeset_id	xiaoshujisuiRNA-od_(MoEx-1_0-st-v1)-Signal	xiaoshujisuiRNA-1d_(MoEx-1_0-st-v1)-Signal	xiaoshujisuiRNA-3d_(MoEx-1_0-st-v1)-Signal	xiaoshujisuiRNA-1w_(MoEx-1_0-st-v1)-Signal	xiaoshujisuiRNA-3w_(MoEx-1_0-st-v1)-Signal	probeset_id	probeset_length	lncRNA_id	lncRNA_length	lncRNA_description	database	gene name	chr	start	end	strand	sequence
ENSMUST00000085979:5341133	5.5675	3.82495	3.67062	3.25302	4.37868	5341133	52	ENSMUST00000085979	1017	cdna:known chromosome:GRCm38:9:44274452:44279838:-1 gene:ENSMUSG00000032131 gene_biotype:protein_coding transcript_biotype:retained_intron	ensembl_cDNAncRNA		chr9	44274452	44279838	-	ACAAAGACTAACCAGTTCAGGGGTGGCCAGAGGGGTGCCTTCCCACTAGTTC
ENSMUST00000110989:4569042	2.00085	2.94404	3.33919	4.25893	3.33796	4569042	180	ENSMUST00000110989	676	cdna:known chromosome:GRCm38:10:19591958:19597851:1 gene:ENSMUSG00000020009 gene_biotype:protein_coding transcript_biotype:retained_intron	ensembl_cDNAncRNA	Ifngr1	chr10	19591958	19597851	+	CATCTGAATCCTTGCACATTCCGTCATCCTTCCTTCTGTGACCGCTCCTCCCACTCGCTGAACTTGTCAGCTGTCTGTAGATGTCACAAAGATGCTAAGGATGCTGTTAATAGTGAAGTGGAGTTTGTTTGTTTAATAGTGAAGTGGAGAAACACGACTAACTTCCAAGGTTTCTCTCTA
ENSMUST00000112256:5484392	5.82545	4.70117	3.45124	3.77434	4.52937	5484392	271	ENSMUST00000112256	1761	cdna:known chromosome:GRCm38:5:23787741:23797057:1 gene:ENSMUSG00000028999 gene_biotype:protein_coding transcript_biotype:processed_transcript	ensembl_cDNAncRNA		chr5	23787741	23797057	+	CTCAGGGGTTCCAGAGTGCAGACTTGGCTGATCAGGCTGATTTTGCAAATGTTTTACCTGCTGAATGACCACCTGCTGCCCCAGGCTTTAGAAATATATCTTTAATGTTTTTAGTGCATAAGTAGGTTTCATTATGACATTTTCATACATATGTACCATTGGAGTTTGCACATGCTGCCAACCCCTGATCTCTCTGTTCCTGTCAGACAGAGGAAACACTTCTACCCCACATAAGTCTTCTAGTAGGAGCCAGTGCTAAGGCAGCCCTACA
ENSMUST00000117124:4661614	sheet	2.19786	2.85036	2.2366	3.42143	4661614	181	ENSMUST00000117124	913	cdna:pseudogene chromosome:GRCm38:X:63034194:63035106:-1 gene:ENSMUSG00000082965 gene_biotype:pseudogene transcript_biotype:processed_pseudogene	ensembl_cDNAncRNA		chrX	63034194	63035106	-	GCCTCCGAGGCAGTGTTGGCATCTTGGGCCAGAATTGCAGCCAATGCTAAAAACTTTGAGGCAGTGCTATGGGGAAAATGTGGTGTGTGGATCATGGGACAAAATCTTCCTGGGAACTCAAGTGGTTGGTTTCAGCTGCAGTTCCCCAATGGACAAGCCTGGGTGCCTGATCAAAAAGAGA
ENSMUST00000117625:5434824	1.12511	1.83821	3.01901	3.35763	1.35453	5434824	87	ENSMUST00000117625	745	cdna:pseudogene chromosome:GRCm38:4:52241712:52242456:1 gene:ENSMUSG00000082267 gene_biotype:pseudogene transcript_biotype:processed_pseudogene	ensembl_cDNAncRNA	Gm12467	chr4	52241712	52242456	+	TTAGATTCTACTCAGGATATAGAAGTAATTCATGAAGAGCTTCAGTTGAGAGATGAGAAAATAATTGGGCCCAGTATAGACAAACTA
ENSMUST00000118146:5152799	2.40682	3.51961	3.77317	4.48149	2.65166	5152799	75	ENSMUST00000118146	540	cdna:pseudogene chromosome:GRCm38:11:90516777:90517316:-1 gene:ENSMUSG00000083268 gene_biotype:pseudogene transcript_biotype:processed_pseudogene	ensembl_cDNAncRNA		chr11	90516777	90517316	-	ACCGCCTTGGCCAGCGCTTGGTGATCTCGTCCGTTGCTTCATCATGTTCTTTATCCACCAGGTGGTACCTGGCTC
ENSMUST00000118407:5550881	4.27465	3.22208	3.37885	2.08603	3.96231	5550881	284	ENSMUST00000118407	910	cdna:pseudogene chromosome:GRCm38:14:45211523:45212432:1 gene:ENSMUSG00000082463 gene_biotype:pseudogene transcript_biotype:processed_pseudogene	ensembl_cDNAncRNA	Gm15765	chr14	45211523	45212432	+	CCGTTGGAATCATATGGTCACCTAAGGTCTCAGGCACCGTGGTGGAGCCCTATAACAACACGCCACTGGTGCACTTGCTGGTGGAGAGCACCGGTGCATCAACAACGGGGCCCTCTACCACATCGCTTCCACAGGCTCAAGTTAAGCACACCCACCTACTGGGACCTCAACCACCCAATATCTGGCACCAAGACCAGTGTCACCACATCTCTGCATGTCCATGTCCCCACCCCAGTCACCTCAACACCAACCTATGCAAACTGGCCATGAACACGGTGCACTTC
ENSMUST00000118647:5515776	3.27115	4.59387	3.61165	5.58806	3.83096	5515776	146	ENSMUST00000118647	1517	cdna:pseudogene chromosome:GRCm38:6:12565518:12567222:1 gene:ENSMUSG00000083794 gene_biotype:pseudogene transcript_biotype:processed_pseudogene	ensembl_cDNAncRNA		chr6	12565518	12567222	+	AAACGGCTGAATGAGCGGCTCGCTAAACTCTCAGGAGTACCTGCGCTCAAGCATGGAGGGACAAGTGGTGTGGAATTGAGTGAGAAGAACGACAGTTACAGATGCTCTCAGGGCTACAAGAGCAGCAGTAGACGAAGGCATTGTTC
ENSMUST00000120761:4632765	2.15336	3.69194	2.78702	4.65533	2.57699	4632765	191	ENSMUST00000120761	1623	cdna:pseudogene chromosome:GRCm38:X:133093940:133095562:-1 gene:ENSMUSG00000082905 gene_biotype:pseudogene transcript_biotype:processed_pseudogene	ensembl_cDNAncRNA		chrX	133093940	133095562	-	ACTGACAAGAGAATGATCAACAAGAAAAAGCTCACACCATTCATCATTCAGGAAAACTTGAACTTGGCTCTGAACTCTGCCTTGGCCATCGGGTGCCACGTGGTTAATATAGGGGCCGAGAACCTGAAGGAGGGCAAGCTTTACCTGGTCCTGGGACTTTTGCTGACATTGAAACTCAGCGGAAATGAAGC
ENSMUST00000120791:4309592	3.2197	4.14205	4.18272	5.31121	3.6532	4309592	62	ENSMUST00000120791	1839	cdna:pseudogene chromosome:GRCm38:X:70420716:70422554:-1 gene:ENSMUSG00000084193 gene_biotype:pseudogene transcript_biotype:processed_pseudogene	ensembl_cDNAncRNA		chrX	70420716	70422554	-	TCCTGGAGAGGAGTCTACAGCAGTCATTCCCCGCCAGGATTTGAGAGCCATGTCAGCCAGCA
ENSMUST00000121120:4667585	2.2836	2.19913	4.90708	4.44405	3.19568	4667585	161	ENSMUST00000121120	306	cdna:pseudogene chromosome:GRCm38:13:26899691:26899996:-1 gene:ENSMUSG00000082236 gene_biotype:pseudogene transcript_biotype:processed_pseudogene	ensembl_cDNAncRNA	Gm11355	chr13	26899691	26899996	-	TACAGTGGAAGCCATTTGGGCCATCAAGCTAGTTTGCCCAGATGCAAGGCTGCAGATGGTGCAGCTGCTGCTGGAGGCTGAGCTACAGGTGCTCTTCTGGGAGCAGCCCTCATCTGAGGGGCCCCGAGGAGTCACCCTGGAAGTGCAGCTTCAGCTTCCAT
ENSMUST00000123200:4332377	4.50441	2.50157	2.64271	1.73941	2.17919	4332377	229	ENSMUST00000123200	806	cdna:known chromosome:GRCm38:3:88364593:88365802:1 gene:ENSMUSG00000041423 gene_biotype:protein_coding transcript_biotype:retained_intron	ensembl_cDNAncRNA	Paqr6	chr3	88364593	88365802	+	TTTGACTTGGGACCACTGCAATCTCTAGTGCATCTTCTATCGTGTTTCCAGACACCTCTTATTTTGTTTTTTGTTTCTCGAGACAGGGTTTCTCTGTGTAGTCTTGGCTGTCCTGGAACTCTGTAGACCAGGTTGGCCTCGAACTCACAGAGACCCACCTGCCTCTGTCTCCCAAGTGCTGGGATTAAAGGCATGAGCCACTATGCCCGGCTACCTGACACTTCATGGA
ENSMUST00000123268:5382773	3.12856	5.69946	4.81676	6.05452	3.47737	5382773	89	ENSMUST00000123268	746	cdna:known chromosome:GRCm38:5:3604822:3606121:1 gene:ENSMUSG00000005907 gene_biotype:protein_coding transcript_biotype:retained_intron	ensembl_cDNAncRNA	Pex1	chr5	3604822	3606121	+	AGGTGATGCTGTAATATGTGCTGTCAATCCCTGCACTAGAGTGCCAGCTATGAAGCAGAGGTGAACGTGTACTAATGGGCTCTGTTTTC
ENSMUST00000123548:5083963	6.79189	5.31615	5.1356	4.34593	5.6846	5083963	218	ENSMUST00000123548	562	cdna:known chromosome:GRCm38:4:148947492:148948914:-1 gene:ENSMUSG00000086606 gene_biotype:antisense transcript_biotype:antisense	ensembl_cDNAncRNA	Gm13205	chr4	148947492	148948914	-	TTCCAGCTTCCGGTCCATTCCTAGGAAAATTCTGCCCCACATCTGCAGGTCTATAGAAGCTTGCCCTGCGCCTAAATTTGCCTCTGCCTGTGGGCCTGAGGCTCTTCTCTATAGGGCCAGAGCAGGAAGGTATCCGAGAGGCATCGAAAGACACCCGCTGCCAAGCTCAGAAGCACCCGGAGCCTCCGTCTCTGGCACCTCACGTACCTCAGTTTTTG
ENSMUST00000123905:5397459	5.07556	2.66895	2.87614	2.4752	3.49189	5397459	399	ENSMUST00000123905	659	havana:sense_intronic chromosome:GRCm38:16:30969393:30973518:-1 gene:ENSMUSG00000087605 gene_biotype:sense_intronic transcript_biotype:sense_intronic	ensembl_ncRNA	Gm15742	chr16	30969393	30973518	-	TGAGGATGTACCCAGCAGAGTGACCCGTCCCTGCAAGCACTTTGGGTGCCTCACCCAGCACTGGCCAGTGAAGGAAGCAAGCAAGCCGTCCTCCACCACCAGCCAAGTTACCTGATGCTTCATCTCCTGCCCCAGTCTTGTCATACCTTACCCTTCCTCCTATACTGGGGAGCCATCTGAAGCTAAAGGAAGAGAGATTGCACCTAAAAGGTGCCCGGGTGTCAGATACTGCATCCCGCACACGGCCCTCACAGCCTATCCTCTGGGATAGAATGTTGAGTTCTGGAGGAGCTGGGGCAGGACACACTGACTGGTTCAGAGTCCTCTGTCTGCTCCTCCACTATGCAAACGCTCGGCCACGTGACGCTGTGTCAACACCGCTGAGCTCGGCTCCATTTA
ENSMUST00000124047:4586921	4.90929	3.76577	3.41736	2.66262	4.27536	4586921	172	ENSMUST00000124047	567	cdna:known chromosome:GRCm38:11:54340369:54353479:-1 gene:ENSMUSG00000085888 gene_biotype:antisense transcript_biotype:antisense	ensembl_cDNAncRNA	Gm12224	chr11	54340369	54353479	-	CCCGGGATGATGATACCTGGCACCCCAGAGCTGCTCGTAGGAATCCCAGAACCGTTGGTGACGCGGGGGCTGCTCCAGTGACAATCATCCTCACATGCCCACCAAGACTGGCCTGTGGGAAGAAAGAAGCTGCCAATGATGGTGACACACGAGATGGTCTTCATTTATGGTC
ENSMUST00000124186:5190544	4.43484	2.89525	2.52624	2.39785	2.88699	5190544	223	ENSMUST00000124186	609	cdna:known chromosome:GRCm38:9:96731556:96732669:-1 gene:ENSMUSG00000040433 gene_biotype:protein_coding transcript_biotype:retained_intron	ensembl_cDNAncRNA	Zbtb38	chr9	96731556	96732669	-	CCCGAGCAGATACCTACTGTATTGCAAGCTTTCTCCAAGAAGAGGATATGACAGTATTCATTCCAGCTGATTTCCTTCCTTAGCACAAGGACTGTTTGATTTGCAGAAGCAGACGATTCATTCACTGTGCAGCCGCGCTGCTGCTTAAGTGCATGGAATGCCTTCAACTGCCTGGTTGCAGAATTTGGAGTTTGCTAAGCAGTGGTTAGTGATTGGGCTCATC
ENSMUST00000124426:4930660	2.6079	4.64917	5.26916	5.91987	3.07865	4930660	85	ENSMUST00000124426	537	cdna:known chromosome:GRCm38:5:37316216:37318491:-1 gene:ENSMUSG00000029122 gene_biotype:protein_coding transcript_biotype:retained_intron	ensembl_cDNAncRNA	Evc	chr5	37316216	37318491	-	GTGACTGTATTACTGTTCTCATGGCTGTGGCAAAATATCCAACAAAACAACTTAAGAGAGGGTGAATTCAGGCTCTCAGTCCATC
ENSMUST00000124672:4447198	3.56103	2.08395	2.4257	1.51079	3.84416	4447198	194	ENSMUST00000124672	1615	cdna:known chromosome:GRCm38:7:131373035:131387833:1 gene:ENSMUSG00000063179 gene_biotype:protein_coding transcript_biotype:retained_intron	ensembl_cDNAncRNA		chr7	131373035	131387833	+	TCCTTACATGTGGAAACATCGATTCACATATATCAAAATCACAGCTGCCTTTAGTGAGATTTTAATTGGATTGGGTTTATATGGATTTAGTTTTTAAAGAGGGTATTCAGTATTGCAAATGGAGTTTCTCCTGCATCCTCTGGGACTGGTATATATTTATTTCACATTTCTGGAGAGACAAACTGGTAATTTGG
ENSMUST00000124689:4438110	6.06594	3.99898	3.67515	3.86986	4.58023	4438110	65	ENSMUST00000124689	220	cdna:known chromosome:GRCm38:2:57265135:57268108:1 gene:ENSMUSG00000026827 gene_biotype:protein_coding transcript_biotype:processed_transcript	ensembl_cDNAncRNA	Gpd2	chr2	57265135	57268108	+	CACGGCAGTCACATCCAATGGACCACCAGGCTTCTGTCTATAAGGGTAGGCACGCCCATTGTTTA
ENSMUST00000124738:4983758	4.7335	4.06894	3.13387	2.56675	4.13492	4983758	158	ENSMUST00000124738	4493	cdna:known chromosome:GRCm38:4:131899478:131920029:-1 gene:ENSMUSG00000085667 gene_biotype:processed_transcript transcript_biotype:processed_transcript	ensembl_cDNAncRNA	Gm12992	chr4	131899478	131920029	-	TCGGGCAACTCCATCTCTTAAAGTCCCTGCAGTCTGCCCGCCGCCTGTCCCTGCCAACTGGTCTGCAAACGTCACAGAGCACCGTCCCAAATGTGCATCTGCCCCTTGCTGAAAACCCTCTTTGGCTCCCTGGTGCTGTCCGAATGGTTTCAGAGCCG
ENSMUST00000124751:5391601	5.02031	3.64736	3.84484	2.84441	3.19302	5391601	1145	ENSMUST00000124751	3686	cdna:known chromosome:GRCm38:2:143546271:143576734:1 gene:ENSMUSG00000027419 gene_biotype:protein_coding transcript_biotype:processed_transcript	ensembl_cDNAncRNA	Pcsk2	chr2	143546271	143576734	+	TGCCGCGCCAGAATTCACCCAGTGGATATAGAATACAAGCAGAAGATGTTGAAACGCTGGGCTCTTGTATATTTTGATATGAGAAATGGATCATTAACAGAACTACAGACACTCTGCTCCTGTTTTTTGCATAGTAAATAACCATAGGCCATATGTATATGGATGCAGGAGAAAACACAGGTGCTTTGCTGCCTAGTCTTGAACTACTACATCAAGACTGCAGGTTGCCTGGGAGCATGATTTAGCTTGTAATGGATGGAAAGACACACAGTTGTTTACTGTGTTGTTTATGGAAGGTTTTACTGGCAACTTTATGCTCTGAAAAAGTTTCTGTGTTTCATATAATGAACAGAAAAATATTAGACCAATAGATAATGACCAGCTCTCTACAGGCAATGG…
ENSMUST00000124977:5146283	3.66328	3.83647	5.27409	5.73313	3.66455	5146283	309	ENSMUST00000124977	989	cdna:known chromosome:GRCm38:16:4714509:4719088:-1 gene:ENSMUSG00000063445 gene_biotype:protein_coding transcript_biotype:retained_intron	ensembl_cDNAncRNA		chr16	4714509	4719088	-	TTCAGATCACCACAGGGGTGCTGCCTGCATTTATGTCTGTGTACCACTTCCATGCAGTATCCACAGAGGCCAGAAAAGGGTGACAGATGCCCTAGAAATGGAGCTGCAGACAGTTGTGAGCTGCTGTGTGGATGCTGAATACTGAATCTTGGTCCTCTGGAAGAACAGCCAGGCCTCTTAACTGATGAGCCTCCACTCCAGACCCTCGGCTCATTTCTCTTAGGAGAATACTTATTTTGGATTTAGGAGTCATGCAATTAATCTAGGATGGTCAAATCTCAACTCTGAATGCTACGTACAAAGACCCTG
ENSMUST00000125238:5339127	2.29133	4.08167	4.14414	5.31177	2.16633	5339127	58	ENSMUST00000125238	547	cdna:known chromosome:GRCm38:2:120500242:120503216:1 gene:ENSMUSG00000079110 gene_biotype:protein_coding transcript_biotype:processed_transcript	ensembl_cDNAncRNA		chr2	120500242	120503216	+	CATGAATATGGCCTTAAGGTAGCCCTCCTGCTTCTGCAGTACCTTCGGGGTTTGCACA
ENSMUST00000125375:5441280	3.07658	6.74609	6.48919	5.52357	4.08099	5441280	565	ENSMUST00000125375	3720	cdna:known chromosome:GRCm38:5:65413224:65422660:-1 gene:ENSMUSG00000029201 gene_biotype:protein_coding transcript_biotype:retained_intron	ensembl_cDNAncRNA		chr5	65413224	65422660	-	CGTGGCAGGGATTTTATGGCCCAGAAAGACTGAAATATTTACAGCAGGCCCTTTATTTTAACATGTTTACTGACTCTGTAGTAAAGTAGGAGACATGGGGAATCATGCCAGGTAAGTGACAGAAGAAATGGAAGATCAATGTGAGGAAAAGGCCAAGTTGGGGCTGGAGAAATGGTTAAGAGCATGTATTGTAGATGGCCGGTGTTTATCCCACGGCCCCTCTAACCTGTGACCAAGATGCACACATGTGCATGCAGGCAAAACTCTCACATGTGAAAAGGAGGAAAAAGGTTACATGTAGCTTTAATGAAACCTGTATTGGGAAGCAGTTAGTATGCACTTAAAGAACTGATTACCTAAAAAATTGTCGCATGATTTATAAAACACTTTTTCTATGTC…
ENSMUST00000125782:5059927	5.1828	4.11289	4.04313	2.83922	4.3502	5059927	1173	ENSMUST00000125782	2731	cdna:known chromosome:GRCm38:7:3630059:3637057:1 gene:ENSMUSG00000008373 gene_biotype:protein_coding transcript_biotype:retained_intron	ensembl_cDNAncRNA		chr7	3630059	3637057	+	TGGCTTAATTAGACCGCACAGATGGCCTCTTCCTGACAATAGGCCCATTTTAGACTCTGGAGCAACCACCGAGTACCGAAGTCAGCTCAGGCTTTCCTACTACTTGGGGCAGCAAATCCTCCCATATGCTATGCTCTTCTCCTGGAAGCTCCTGTAGCAGAGTCCCTTCCCTCATTGCAGAGAGGTGCTTGAAAAGGGAATATGGGGAAAATCACCATCTTTGCTTACTTAGCTTCAGTCTTGAGGCCCTCTGGCCAGGCTGTTTCAGAGCTGGCAAAGGCTGAGACCAAGGTGCTGTGAGACCTCTCCAGAGGCCTCTGCCTGGCTCAGACGTGTCTTCTGTGTCTTCATGGAGTTACACCACTTGTATCTGTGTCCTTATCTCCTTTCCTTACAAGC…
ENSMUST00000126228:5243409	3.36889	4.99485	4.39486	5.37456	3.72336	5243409	110	ENSMUST00000126228	681	cdna:known chromosome:GRCm38:16:44385384:44387143:1 gene:ENSMUSG00000043065 gene_biotype:protein_coding transcript_biotype:retained_intron	ensembl_cDNAncRNA	Spice1	chr16	44385384	44387143	+	TTGTGTTGGTCAAGTGTAACGACCCGTTTTGGACCTGTCAGCCAAACCCTTTCCAGGTCTTCCCAGTAAAGAGAGCAGTTGCACGATCGATGGCTCGTGGTAAATCTCCC
ENSMUST00000126560:5431090	3.8783	4.99862	4.74038	6.96856	6.05472	5431090	92	ENSMUST00000126560	688	cdna:known chromosome:GRCm38:10:21994711:21996341:1 gene:ENSMUSG00000019970 gene_biotype:protein_coding transcript_biotype:retained_intron	ensembl_cDNAncRNA		chr10	21994711	21996341	+	GGCCGGGGCTCGCAGGCCTGGTGAAGAATTTCTACCCTGTGGTTTGCTGCCCTGTTGAAATCTGAATTTGCCACTAAATCTCATCTCTCTCC
ENSMUST00000126588:4871757	5.08773	6.80751	7.81189	7.90792	5.64297	4871757	75	ENSMUST00000126588	446	cdna:known chromosome:GRCm38:2:30892488:30897469:-1 gene:ENSMUSG00000050737 gene_biotype:protein_coding transcript_biotype:processed_transcript	ensembl_cDNAncRNA		chr2	30892488	30897469	-	CCTGGGGTCACCAGAGTTCTCTCCCCACCACTGCCGAAAAGCAGCCCTGTTCTGACGATGATGACGTGTGTTGAG
ENSMUST00000126631:4484841	4.30248	3.15126	2.91906	1.60442	4.2485	4484841	107	ENSMUST00000126631	407	cdna:known chromosome:GRCm38:9:59909898:59910940:1 gene:ENSMUSG00000039585 gene_biotype:protein_coding transcript_biotype:retained_intron	ensembl_cDNAncRNA		chr9	59909898	59910940	+	GGAGAGGGGCTTCTTGTGACTTCTTTTTAAGTAATGTTTGTGACATATATGGGTTATGCCCAGAGGAGCTTCTCAGAAGGAATACAGGTGCTATGAATATCTGATGA
ENSMUST00000126791:4596463	6.49869	5.4016	4.8423	3.96658	5.81583	4596463	51	ENSMUST00000126791	710	cdna:known chromosome:GRCm38:5:24324490:24325789:-1 gene:ENSMUSG00000038319 gene_biotype:protein_coding transcript_biotype:processed_transcript	ensembl_cDNAncRNA	Kcnh2	chr5	24324490	24325789	-	ACTGAGTCGTGACCGGACCGCGAGTGTCGTTGACCTGGTGCGGGGCCTGAG
ENSMUST00000127164:5434523	6.18362	4.85818	4.63925	4.05441	5.40334	5434523	172	ENSMUST00000127164	784	cdna:known chromosome:GRCm38:7:44350762:44352057:1 gene:ENSMUSG00000038738 gene_biotype:protein_coding transcript_biotype:retained_intron	ensembl_cDNAncRNA	Shank1	chr7	44350762	44352057	+	AAGGCCGGTCATAACTTGGCTGGGAGCGGTGGTGAGGATCAAAGCTCGACTTCGGGGCAGCAGTTAGAGGAAGAGAGAAAAGAGAGCGAAGAGGGATCAGTCAGAGTTCTCCACACTCCAAAAGGAAATTACTTTCTCCTCTGAGCTCTTTCATGGCAGAGACGAGGCACAC
ENSMUST00000127344:5171184	5.18708	3.77324	3.83382	2.95744	4.1115	5171184	67	ENSMUST00000127344	582	cdna:known chromosome:GRCm38:2:72476390:72481860:1 gene:ENSMUSG00000055612 gene_biotype:protein_coding transcript_biotype:processed_transcript	ensembl_cDNAncRNA	Cdca7	chr2	72476390	72481860	+	CGCGGGTTAGCTCCGCTCACTTGTCCCACGCGCTCCTGATTGTCGCCAGGTTGAGGGAAATCACAGA
ENSMUST00000127358:4308838	7.23302	7.49884	5.7986	4.92484	4.83591	4308838	153	ENSMUST00000127358	321	cdna:known chromosome:GRCm38:2:101832071:101883027:-1 gene:ENSMUSG00000032841 gene_biotype:protein_coding transcript_biotype:processed_transcript	ensembl_cDNAncRNA	Prr5l	chr2	101832071	101883027	-	AGACCTGTCCTGATGCGTTCTGCCACCTAAGGCCCACACATTGAAAACTCCAACCAGCACAGCTCCTTTCTGTGGCAAACAGCATGACAGTAGGGAAAAAAATTGTTTTTTTTTTTTGTTTTTTTTTTTTTCTTGCTCTGAACAAAGTTGAAC
ENSMUST00000127376:5205627	5.26546	4.73899	3.78576	3.19745	4.91395	5205627	429	ENSMUST00000127376	705	cdna:putative chromosome:GRCm38:4:41403301:41404786:-1 gene:ENSMUSG00000028438 gene_biotype:protein_coding transcript_biotype:processed_transcript	ensembl_cDNAncRNA	Kif24	chr4	41403301	41404786	-	TTTTGCCCTAACGTGAAGCCAGTCACTGAGGCTGGGTAAATCAGGACAGAAGCATGCTCTCATCTGACAGTGGAAGTCCTGAGCTGGACGGCAGGTCCAGGCAGCCTCTGCACAATGCTAGGCCGCTCTTCTTTCTCCCTGCCTCCTTTCCTCAATCCCTACCAGTTAGAAAGAGAAATGTTTCTGCAATTGCTGCATGGTTGAGAAAGGTTTTTCCTACTCTCTAAAACTTAAACTATATTTCAAGGATGCAAATGTAGAAAGTAGTATATCTCAGATACTTGTCGCATAGTTTCAAGTTATCAACACTTGAAGACTTAACCAGGGCCAGGAAGGTGGCTCAGTAGGGTGAAGGTACTTGCTGCCTAGCCTGACATCCAGGGGAAAAATAGCAACTCA…
ENSMUST00000127551:4382108	3.3432	3.57602	4.61669	6.26928	4.38771	4382108	174	ENSMUST00000127551	351	cdna:known chromosome:GRCm38:15:84324026:84327050:1 gene:ENSMUSG00000022439 gene_biotype:protein_coding transcript_biotype:processed_transcript	ensembl_cDNAncRNA	Parvg	chr15	84324026	84327050	+	TCAGTGGATTTAGGGTACCTCGCTCATCAGCAACTTAGAGGAGGAAGCTGTCTGCAGCCACCGGGGTGGCAGAGGAAGTGAACAGAAGCCCTGCCTTCCACCTCCGGAACCTGTCTGCGTTGGGAACCTGGTCACCCTCTAAGCTAGTGGGCTCCATTTCCTGATTTGAAAAGA
ENSMUST00000127711:5150084	2.38063	4.24492	3.66556	4.69255	2.60456	5150084	89	ENSMUST00000127711	412	cdna:putative chromosome:GRCm38:4:135143421:135144285:-1 gene:ENSMUSG00000084986 gene_biotype:antisense transcript_biotype:antisense	ensembl_cDNAncRNA	Gm16224	chr4	135143421	135144285	-	AGGGCGGCATAGATCCCTAACTGGCCTTGCACTTTGTGTTGCTGAGGATAATTCCCGATCCTCCCTTGTCTATCTCCTGGGTCCTAAGA
ENSMUST00000127731:4327623	4.94326	2.99791	3.52283	2.42281	2.99791	4327623	697	ENSMUST00000127731	4358	cdna:known chromosome:GRCm38:11:54335497:54361539:1 gene:ENSMUSG00000020333 gene_biotype:protein_coding transcript_biotype:processed_transcript	ensembl_cDNAncRNA		chr11	54335497	54361539	+	TGGGGCATTATCCTTCAAACGCTGAGATGCTTTGGTGGGAAACGGAGGCATGATTGCTGGTTGAGATCAGGTTCAGAGTCATGATCCAAGATCCCGAAGTCTGTCCAAGCCGGCTCAAAAGCAAAAGGAGAGTGAAGACTTGTAGGACAAGACAGAACAGTTAGATCCCACTAAGGAAGTCCCCACCCTTTGTTGGCCGGAACAGCCTGTGTCTCTGGGACCAGTCCCATCTGGGAGACAGCTGTGGGATAGTGCCCAGCTTGTGTATTCTCCTTTAAGAACAGCCTGATTCCCAAGCGGTGGCTTGGGAGGCTACGTCTGGCCACCTGTTTGTGGCTTGGCCTCTTTTCCTCTGCCACCCGCCCACAACTCAGCCCAGCTGGCATAAATGATATGTAG…
ENSMUST00000127842:5156716	2.03368	2.42399	2.64827	4.1305	4.36443	5156716	58	ENSMUST00000127842	2743	cdna:known chromosome:GRCm38:9:90054506:90076087:1 gene:ENSMUSG00000032359 gene_biotype:protein_coding transcript_biotype:retained_intron	ensembl_cDNAncRNA		chr9	90054506	90076087	+	TGTTCCCTGGACTGTTCCTCCAATCCTGCTAGATTAGGTCCAACTCAACTTCTCTTTC
ENSMUST00000128109:4761655	4.57483	2.98031	2.44086	2.50057	3.37565	4761655	458	ENSMUST00000128109	2212	cdna:known chromosome:GRCm38:6:4688612:4747080:-1 gene:ENSMUSG00000004631 gene_biotype:protein_coding transcript_biotype:processed_transcript	ensembl_cDNAncRNA		chr6	4688612	4747080	-	GGCAGAGGCTAGAGTATGACAATCCTGTTGTTTTTAAGAGATGATGGGTTTTGTTTAGTTAGTTTTTGTTTTTTTTGTTTTTTTTTAACCACCACAGACCTATATAATCTAAACGATTTTTGTTTCTTTGGTATAAATGATTTTTAAATTCCTTTTTTCTTTCTCTATGATCTGTTTGTATATAAAATAAGCAACTCTGCTTGGGCTCTGGACATATACTTATTTTTTGCTTGGTTTTGTCCTTTTAAGGCAGGGTTTCCTGTAGCCCAGGCTAGCTTTTAAGGCAGGGTTTCCTGTAGCCCAGGCTAGCTTTGAGCTTCTGGTTGTACTCCAGCTTCCAAGTGCTAGAAACACAGGCGAGTGCCACCATGTCCAGATGAACACACATATAATTATAGC…
ENSMUST00000128197:4837814	5.2032	3.28289	3.28289	2.77548	3.1761	4837814	141	ENSMUST00000128197	5108	cdna:known chromosome:GRCm38:X:41400854:41613099:1 gene:ENSMUSG00000001986 gene_biotype:protein_coding transcript_biotype:retained_intron	ensembl_cDNAncRNA		chrX	41400854	41613099	+	TCTTTAGATCCACCATCTTCGAGGGCGGGGGAACCCTTTGGTTTTCTTTATAATTTCTTTCTTATTTCTTTATCTCGTCCCTGTTTTGTTTTGTTTTGTTTTTTTACGATTTTGGTTTTGCTCCGGTTTTAATTCTCTCTG
ENSMUST00000128197:4996491	4.80693	3.04453	3.22497	2.48601	3.67069	4996491	141	ENSMUST00000128197	5108	cdna:known chromosome:GRCm38:X:41400854:41613099:1 gene:ENSMUSG00000001986 gene_biotype:protein_coding transcript_biotype:retained_intron	ensembl_cDNAncRNA		chrX	41400854	41613099	+	TCTTTAGATCCACCATCTTCGAGGGCGGGGGAACCCTTTGGTTTTCTTTATAATTTCTTTCTTATTTCTTTATCTCGTCCCTGTTTTGTTTTGTTTTGTTTTTTTACGATTTTGGTTTTGCTCCGGTTTTAATTCTCTCTG
ENSMUST00000128702:4734565	7.4096	6.60941	6.11455	4.72324	6.13097	4734565	154	ENSMUST00000128702	756	cdna:known chromosome:GRCm38:5:115907470:115925600:1 gene:ENSMUSG00000029516 gene_biotype:protein_coding transcript_biotype:retained_intron	ensembl_cDNAncRNA	Cit	chr5	115907470	115925600	+	GGGTTACCGCCAGAGCACGCACTAAGGAGTGGGGAGGTGGTAGCATGCAGCCTGCACTGCGGGGGATGTGATGCCGGCTTGCCAACTTCCCCCTGCCTGGTCCACTGCGGACGTCCCAGCCTGCAACCATGGTAACACTTCTGACTGGAAATGC
ENSMUST00000128763:4816952	1.52486	2.278	2.76469	4.08723	3.53697	4816952	59	ENSMUST00000128763	469	cdna:known chromosome:GRCm38:X:74274368:74276846:-1 gene:ENSMUSG00000019088 gene_biotype:protein_coding transcript_biotype:retained_intron	ensembl_cDNAncRNA	Dnase1l1	chrX	74274368	74276846	-	GAAGGACCCTTTCAATCTAATCTGCATTCCACCTAGAGCCTTAAGAGCCCTAACTCTGG
ENSMUST00000128828:5363752	1.58786	1.53156	2.4794	3.69622	1.43044	5363752	115	ENSMUST00000128828	1402	cdna:known chromosome:GRCm38:2:131050591:131054036:-1 gene:ENSMUSG00000027318 gene_biotype:protein_coding transcript_biotype:retained_intron	ensembl_cDNAncRNA	Adam33	chr2	131050591	131054036	-	TGTTAGAATGTATCTAATAACAATAAATCCACAAGTTATATCAGTGTTGTTGGCTGTGACCTGTTAAAAGGGTCTAAGTTGTTTATTAAAAAGATATGGAGATGGATTACTGAGA
ENSMUST00000128849:4654235	3.58183	3.909	5.25662	6.13407	5.03416	4654235	202	ENSMUST00000128849	522	cdna:known chromosome:GRCm38:6:15727799:15770349:1 gene:ENSMUSG00000041390 gene_biotype:protein_coding transcript_biotype:processed_transcript	ensembl_cDNAncRNA		chr6	15727799	15770349	+	GCATGAATTCTGCTGGACAGGGATCAGCATGGCTGACTGCCTTTCTCAGAAGGGACCATGTGGGAGCTTGGGAATAGAAGCAGAGAGAATGGATTGTGGAATTGGCATCGGACTGGGAATTGGCAGGGTTTCAGAAAGCCATGGAAGAAAGAGGGACAAAGGACAAATATCCTGGAGATGTGGCTGGAGTGTCTTTATACTC
ENSMUST00000128900:4422422	9.38295	8.69488	8.36392	7.26957	7.7175	4422422	127	ENSMUST00000128900	447	cdna:pseudogene chromosome:GRCm38:17:26286363:26287061:-1 gene:ENSMUSG00000084893 gene_biotype:pseudogene transcript_biotype:unprocessed_pseudogene	ensembl_cDNAncRNA		chr17	26286363	26287061	-	CCAGGCTCACGGCAAGAAGGTAATGGATGTGCTGACTGATGCTGTAAACCATGTCAATGACCTGCCCGATGCCCTGTCCACTCTGAGTGACCTGCATGCCCACAAGCTGTGTGTAGATCCCGCCAAC
ENSMUST00000129074:5551875	3.03349	3.50456	4.54655	5.5209	3.93953	5551875	238	ENSMUST00000129074	847	cdna:known chromosome:GRCm38:11:8451070:8468675:-1 gene:ENSMUSG00000020422 gene_biotype:protein_coding transcript_biotype:processed_transcript	ensembl_cDNAncRNA	Tns3	chr11	8451070	8468675	-	TCCCGGGATTCTTTCCTGCGACCTACTCTCCCGCTGCCCTCTGAATGGGCCTCTTTGGAGGTGGCAGCCCCGCCTCTCGCCCTGACTCCCCCGGGGACTGGCAGAACACTGAGCCCTCCCAGGGTGGGTGGGGGACGCCATTGGGCCGGACTCAGCACCCGGGGCTGCTGGGGACAGACCCTGCAGAGTGCCTTTAACAAGGCTCACAGATTCTAGGCCCTTCCATGGACTGACCGGA
ENSMUST00000129526:5493808	2.77268	1.69336	2.74083	5.27013	4.51819	5493808	77	ENSMUST00000129526	2446	cdna:known chromosome:GRCm38:9:109017380:109032197:1 gene:ENSMUSG00000025648 gene_biotype:protein_coding transcript_biotype:processed_transcript	ensembl_cDNAncRNA		chr9	109017380	109032197	+	GGTCTGTTTGCAAAGCTCACTCTTCTGCTGCAGCTGTTACCTTGTCAGGAGGATGTCTTGTCGCCTCTGGAATTCAA
ENSMUST00000129688:5036656	1.81409	2.41194	2.91738	3.83606	2.35515	5036656	285	ENSMUST00000129688	617	cdna:known chromosome:GRCm38:18:37896157:37897942:-1 gene:ENSMUSG00000024456 gene_biotype:protein_coding transcript_biotype:retained_intron	ensembl_cDNAncRNA		chr18	37896157	37897942	-	TGGTGCTATTAATATCAGATGGTCCTTAAAAAGTCAGAGTAACTTATATTTCATAGCTCAAAGATTTTAACTTTGTATTCATGAGTAGGAGTCTAGGAATGAGTTTTAGGAAATTATTCTCTCAAAAGATAGTCAGTTGCTTTTATCAGATTCTGGTATCAGTTGGGGGTTAAGAAAATAATTTGAGAAATCTGAAGCACTGGTGATGTCTTGTTTCCTAGTTGGTTTGTTCCCTGTCTTATCTCTCATGTCTGTGTCAGTGCACCTGGGCAATTCTCTTTCTGT
ENSMUST00000129840:4841406	6.03705	5.44289	5.46829	3.61381	5.28543	4841406	54	ENSMUST00000129840	286	cdna:known chromosome:GRCm38:4:130336856:130338584:-1 gene:ENSMUSG00000028772 gene_biotype:protein_coding transcript_biotype:processed_transcript	ensembl_cDNAncRNA	Zcchc17	chr4	130336856	130338584	-	TTTTGAGTGTTTCGAGGCAGGGCCTCGGTGTGTAGTCTGCATGGCCTCAAATCT
ENSMUST00000129877:5140099	5.8844	4.23703	4.6854	3.81709	5.1072	5140099	120	ENSMUST00000129877	550	cdna:known chromosome:GRCm38:10:127578329:127581885:-1 gene:ENSMUSG00000040249 gene_biotype:protein_coding transcript_biotype:retained_intron	ensembl_cDNAncRNA	Lrp1	chr10	127578329	127581885	-	AGGATGTAACAGTGGCTTGGTGTTATGTAGAGGAAAGGGCAAGAAAGAGCCAGAGTCTGTATGAAAGACCCCGGGAACCCAAACCCTGGCCAGAATCGAGCACCGGCACCTTCTGCAGGT
ENSMUST00000130419:4817916	2.42201	2.48304	2.60178	4.45148	3.04596	4817916	149	ENSMUST00000130419	1043	cdna:known chromosome:GRCm38:9:79776854:79793430:-1 gene:ENSMUSG00000032328 gene_biotype:protein_coding transcript_biotype:retained_intron	ensembl_cDNAncRNA		chr9	79776854	79793430	-	AGCTTCTCAATTCCACTACTGCCTGTTTATTTCTTGGGAGTTTGGCTTTATTTCTTTGTAATGGGATTTTGATGAGTCTAGTATTTTAGATGTGTAAGTGTGTTCTTATGGGGTTGATTCATTATTCTTACGCTAGGTGGGGATATGCA
ENSMUST00000130448:5374939	3.55296	4.7825	5.73154	6.48036	3.59334	5374939	398	ENSMUST00000130448	1225	cdna:known chromosome:GRCm38:5:108430377:108432397:1 gene:ENSMUSG00000029491 gene_biotype:protein_coding transcript_biotype:retained_intron	ensembl_cDNAncRNA	Pde6b	chr5	108430377	108432397	+	TTGGCCTGTTGAGAAACTCTGCTTGCTGGGCCAAGGCTGTGAGCAGAGCTGAGATCAAATGCAAGTGGCCTGAATGCTTGGGTGGGACCCTAATGAAGGAAGCAGCCAGCAGCTTTGTTTGCTGTTGATGCTGCAGCTGTACAGAGGAGCCTGGAAGGTAAAGCAGGGGCAGTCCAATGGGCCCTCACAAGACTAACCTCTGAGATGGGCACTATCTGCCAAAGAACAAGCTTAAGGGAATCTCAAAGAATCTGTCCTCCTGACAGGCCAGCACTAACTGGATGGGGCCATTCCTGGGAAGAGAAGACATCCGGAAGTTTGCCTTTAGCACTATGGGGCATAGGGGTGGCAAATTTAACCCTCAGAGCCCCAAATAGTGGGATACCATGAGCAGCTCC
ENSMUST00000131047:4672410	5.4411	5.07963	4.24273	3.14653	5.61742	4672410	67	ENSMUST00000131047	421	cdna:known chromosome:GRCm38:9:99392840:99401283:-1 gene:ENSMUSG00000032470 gene_biotype:protein_coding transcript_biotype:retained_intron	ensembl_cDNAncRNA		chr9	99392840	99401283	-	GTAGGTGGCTGTGCCTGCATGCCTGCATGTTTGGGCCTCAGGGCCAGGTGTGAAAGTCCATATGCCA
ENSMUST00000131086:5147703	6.28987	5.11552	5.04272	3.65811	5.04272	5147703	67	ENSMUST00000131086	548	cdna:putative chromosome:GRCm38:14:33250390:33271983:1 gene:ENSMUSG00000063506 gene_biotype:protein_coding transcript_biotype:processed_transcript	ensembl_cDNAncRNA	Arhgap22	chr14	33250390	33271983	+	ATGATCGGCCCAGCGGGTCTGGCCAGGTGGCTGCGGCATGCTGAGCCCGAAGATCAGACAGGCCAGG
ENSMUST00000131174:4560675	3.01987	4.27647	3.69074	5.20234	5.01784	4560675	81	ENSMUST00000131174	2449	cdna:known chromosome:GRCm38:7:126623252:126627010:-1 gene:ENSMUSG00000030717 gene_biotype:protein_coding transcript_biotype:retained_intron	ensembl_cDNAncRNA	Nupr1	chr7	126623252	126627010	-	ACTCACAAGTGAGCATCTCTCATTCTATACTTGAGTAAACAGCAAGGATAGAGTGCTTCAGACGTGAAGACGTGACCGCCC
ENSMUST00000131250:4722646	2.10892	2.97698	4.28166	4.99999	2.43081	4722646	64	ENSMUST00000131250	346	cdna:known chromosome:GRCm38:16:4616464:4616988:-1 gene:ENSMUSG00000014301 gene_biotype:protein_coding transcript_biotype:retained_intron	ensembl_cDNAncRNA		chr16	4616464	4616988	-	TTCCTGCATGACACAGATCAGAGGTCAGGCCTTCCTAATGTCTCAGAGACTAATGTGCACTGTC
ENSMUST00000131400:4336817	3.15484	2.32499	5.86822	6.77762	5.83461	4336817	242	ENSMUST00000131400	613	cdna:known chromosome:GRCm38:2:91082408:91090310:1 gene:ENSMUSG00000002111 gene_biotype:protein_coding transcript_biotype:processed_transcript	ensembl_cDNAncRNA	Sfpi1	chr2	91082408	91090310	+	CCGGTTAGAGCGCAAAAGATGGCTGAACATAACTGGGCAAACCTGTAATACACTGTGTCCTCCGGGAAGCAGGAACAGAAGACCTGTCAGTTCAAGGCCAGAAAAAAGAAAGAACAAAGAAAGAATAACCCAAGTTGATAAGGACCTGGTTATAGAAACTGTGACCACGAGACACTATCCAGCAAATGACAAGAACCACAGCAACACGCATCCCCATGGGCCTCAAGAGCAACACCAAAGAC
ENSMUST00000131529:5152210	4.59958	4.19072	4.70898	2.52908	5.15773	5152210	112	ENSMUST00000131529	801	cdna:known chromosome:GRCm38:2:25890647:25894460:1 gene:ENSMUSG00000058740 gene_biotype:protein_coding transcript_biotype:processed_transcript	ensembl_cDNAncRNA		chr2	25890647	25894460	+	CAGGGAGGTTCCTTAAATGTTAGAGCACCAGTTTCAGTTGGAGGTGGGCCCTGCGTGAGCAAATGGGGCCTTTTCACTCACTCTGAGCCCTTGGCGTCAGCCCTGGAAGTCT
ENSMUST00000131602:4775222	2.83498	4.43935	5.21465	5.98645	3.54569	4775222	95	ENSMUST00000131602	1052	cdna:known chromosome:GRCm38:7:19791855:19796805:-1 gene:ENSMUSG00000040525 gene_biotype:protein_coding transcript_biotype:retained_intron	ensembl_cDNAncRNA		chr7	19791855	19796805	-	GTTCCCTGGGACAAGTAGTCTAGTCCTGGCAAGTGTGTAGGGGGCAGGAACGGGGGCGGGGGCGGAATCCCTCAACTTCTGAGAGGCTAAGAATT
ENSMUST00000131603:5471579	3.91657	3.63833	3.64681	1.83727	3.34481	5471579	52	ENSMUST00000131603	377	cdna:known chromosome:GRCm38:2:132144533:132220250:1 gene:ENSMUSG00000086756 gene_biotype:antisense transcript_biotype:antisense	ensembl_cDNAncRNA		chr2	132144533	132220250	+	GAGAGCCTGCTGTCGAAACGGGATTGATTCCTTTCCAAGTGTTCCTGCTCCA
ENSMUST00000132013:4398395	4.55151	2.76185	3.33098	2.3703	4.30761	4398395	170	ENSMUST00000132013	2766	cdna:known chromosome:GRCm38:8:64718227:64733578:-1 gene:ENSMUSG00000031604 gene_biotype:protein_coding transcript_biotype:retained_intron	ensembl_cDNAncRNA		chr8	64718227	64733578	-	CTCCCACGGGCTGGATTTAAAGGTGCGAGCCATCACACCCAGCTCAGCTCTCTTGAAGCTGGGAGAATCGAATGGTTCATATACGCAGTTAGATCAAGCTGGCTATTGGGGTTCATTTCATGTCTGGGCAGCAGCCTAAGTCGTGGTTACCTGGTACTCACTACTGTTGG
ENSMUST00000132029:4587106	1.56753	2.15667	2.17155	3.63995	2.74504	4587106	355	ENSMUST00000132029	3689	cdna:known chromosome:GRCm38:6:4505702:4515019:1 gene:ENSMUSG00000029661 gene_biotype:protein_coding transcript_biotype:retained_intron	ensembl_cDNAncRNA	Col1a2	chr6	4505702	4515019	+	GTAAGAGGCTATGTTTCTTCATAAATATCTGAAATTACCAGAATAATTTCAGTTTGACAAAATTTAAGGTGAACTACAGAAAGAAAATACTTTAGCGAGATTTTACCTATATGAATATGTATTCACCAAACCATAAAACAGAGTACTGTTAATGTTTGATGTAACAAAGTTTTATTATCTTCCAGAAGCATCTTTAATTACATTTATGTTATATGAATTAATGATTTACATAGTAAAGACTTTGTAAATATCTATTTATATTCTTATAAGGGGTGCATATTATATTAATTATAGATAATAATTTAAAGTTTATTTTAAAGGAATGACACTGTAAATGTGCTGTGAAGGTATAATA
ENSMUST00000132029:5522814	2.638	2.47478	2.11287	5.57175	4.96124	5522814	315	ENSMUST00000132029	3689	cdna:known chromosome:GRCm38:6:4505702:4515019:1 gene:ENSMUSG00000029661 gene_biotype:protein_coding transcript_biotype:retained_intron	ensembl_cDNAncRNA	Col1a2	chr6	4505702	4515019	+	GCAGGCTGCCTCAGTAATACACTTGAGATTTTCATCAGTCATCAATAGGCCTCAAAAGATCTTTGAGGTTATAATAAACCTCTGTTTAATCATTAAGTAGGACTTTTGATCTTTTTCAATTTATGGCCCGGTAGCAATAAACATATCAATTTCTTAGCTACATATGACATGGAGAGGTGACATATGACAAAAGGAATCTAACTGATACTCTTTATCAGCCATTATGTGGTCTGTTCTTGTGCAAAGATCAGTTCTCTTCATTGCCTTAGAACAATCTCCAGATGACCAAATTTGCACATCTCGAGGAACTTATGA
ENSMUST00000132050:4370336	5.68522	4.98155	5.38137	3.66647	5.91866	4370336	699	ENSMUST00000132050	2711	cdna:known chromosome:GRCm38:13:42680799:42958901:1 gene:ENSMUSG00000054728 gene_biotype:protein_coding transcript_biotype:retained_intron	ensembl_cDNAncRNA		chr13	42680799	42958901	+	TGGCTCCATCCTGAACCGAGAACGGACTTGTCTAAACCATGGACTCTCTGAAACAGTCCCTTCACTCTGACTCTGCCTTCACCTCCTTTTGGATGAATACTAATGTGCTGGTGTCAGATAACTCTTGAGGTGTTAAAAATCTGAGAACTAAGCATGTCAAGCACTTTTGACTCCCAGCCTTTATCCAGTAGATTTGCTAACTTTAATTTCTTAGCATTATTCTTGTGCTTGATTTGGCAGCTAAGAATACCATTTATACATGATTTCAGCCTCTTTTTAAAGACTCAGCTCCTAAATGGGCATAGTTTCAAACTGATACACACACACACACATACACACACACACACACACACACACACACACACACACACACACCTGGACTGAAGTGCAGCCATCAGA…
ENSMUST00000132477:5437617	5.4233	4.8078	4.25822	3.17447	4.587	5437617	78	ENSMUST00000132477	639	cdna:known chromosome:GRCm38:11:82389123:82434723:1 gene:ENSMUSG00000020701 gene_biotype:protein_coding transcript_biotype:processed_transcript	ensembl_cDNAncRNA		chr11	82389123	82434723	+	GAACCGAAGGAAGGAGCACCTCATCCCAGTGTTCCCCTGGACTCTCCGCCGTCGCTACCAGCACGGTTCCCGGCTGCA
ENSMUST00000132774:4364526	5.37224	2.58422	4.1088	3.16799	5.11025	4364526	2649	ENSMUST00000132774	4171	cdna:known chromosome:GRCm38:11:73315997:73324337:-1 gene:ENSMUSG00000020774 gene_biotype:protein_coding transcript_biotype:retained_intron	ensembl_cDNAncRNA		chr11	73315997	73324337	-	GGCAAGCCCTAGCTGTACTTAATTTCCTGAGTTTCTCTGAGCAGATCTCTGTATTTACTCTTGCTTCCTTTGCAGTAACACTCAAGCTTTGAAATGAGTCTGGTGTTCTCATTCCCAAAACTCACATGGAGTAAAACCTTCTATGAATGCCTGTCAGACTCATCCCCATTTTTATTGCAAGAATTTGTATATTCCACAGGTATTTGTATGTCTGTTACAAAACAATACTGTGCTAGGTCCTGACACACAATCTCCAAGAGCTCAGTGTCTAATGAAAAGATGGAACTTTAACCAGATAATTACTCCATAGTGGCAAACTGCTAAAGAAGGGGTAACGCCATTCTGTTTCCTGGGAGATCTATTAGTATAACTAGTTATCTACAAAGTATGCTGTAAATA…
ENSMUST00000133187:5522365	4.45457	6.79936	7.61564	7.60388	5.45643	5522365	65	ENSMUST00000133187	2735	cdna:known chromosome:GRCm38:13:55075136:55100299:-1 gene:ENSMUSG00000025878 gene_biotype:protein_coding transcript_biotype:retained_intron	ensembl_cDNAncRNA		chr13	55075136	55100299	-	GTAAGGGTCAGTGGTGTTGTAATTAAGGATCATTTATTTACAGCTAAAATAAGAATTAACTATTT
ENSMUST00000133230:5256359	3.66123	4.7183	5.49889	6.91489	3.7692	5256359	59	ENSMUST00000133230	3203	cdna:known chromosome:GRCm38:12:84346492:84361792:-1 gene:ENSMUSG00000021234 gene_biotype:protein_coding transcript_biotype:retained_intron	ensembl_cDNAncRNA		chr12	84346492	84361792	-	ACCTCTGCACGTTACCACTTATCTAAGACGCAGCCCCGTTAGTTCTCGGATCTGCTGCA
ENSMUST00000133312:4643294	5.50464	5.26124	4.81307	3.1111	5.22307	4643294	133	ENSMUST00000133312	422	cdna:known chromosome:GRCm38:9:44694464:44696431:-1 gene:ENSMUSG00000048537 gene_biotype:protein_coding transcript_biotype:retained_intron	ensembl_cDNAncRNA	Phldb1	chr9	44694464	44696431	-	GCCCATAGATGGGTGACAGAGCCCGGGAGAGGGTAACAAGCCTTTGAGGATCTGCTTGCTCGGCCAGGCCATTGTCCAGGGTTGGTGGCCTCTGCAGCTCTGGCCAGGCTTGAGGGCACTGAGACCTGGCTTT
ENSMUST00000133614:5311981	2.00161	3.74134	4.12282	4.36028	1.9541	5311981	135	ENSMUST00000133614	670	cdna:known chromosome:GRCm38:X:109095509:109197873:1 gene:ENSMUSG00000031246 gene_biotype:protein_coding transcript_biotype:processed_transcript	ensembl_cDNAncRNA		chrX	109095509	109197873	+	TGCAGTCCTGGGGTAATAACGGAAAGCAGAACCAATTTACGTGATTAAAGCTGTCATCCTTTGTAAGATGTAAGCAGACGCTGAGAAGCAAACCAGACAGAAAGGTCTTTCTGAGTTTGGACTGTTGGCATCTCA
ENSMUST00000134094:4524902	4.31832	5.83996	5.87863	7.42034	4.56232	4524902	606	ENSMUST00000134094	996	cdna:known chromosome:GRCm38:4:86667665:86669986:-1 gene:ENSMUSG00000028494 gene_biotype:protein_coding transcript_biotype:processed_transcript	ensembl_cDNAncRNA		chr4	86667665	86669986	-	GATTCTGCGGTCAACACTGAGCCCAAGGGACTGGGTAGGGTGAGTGCTAAGTCACACCAGGGATCCCCCAGGCCTTCCTGAAGCACAATCCCTCCTCTACCCAGAAACTGTCTGCTGACCTTCCTTCACACGGATGGGCTCTTCACAGCCATACCGGTGCTCACTCTTATTACTCTAATAGAAACTTCCCAGCCAGGCGTGGTGCTCACACCCCAGCACTTTGAAGGGAGGTGAAGAGGTGTCAGTTGAAGGCAGACCATGGCTACATAGTGAACTGCAGGCTGCCTGGGCTGTATGAGACAGTGTCTCAAAAAGGAAAAACAAACAAACAAACAAACAAACAACAACAACAACCCTATACTCGAGGGTGTGTGCCGTTAGTCCAATTAGGCAGGCAGA…
ENSMUST00000134248:5345872	6.58817	5.77133	4.8313	3.98956	5.06103	5345872	427	ENSMUST00000134248	2230	cdna:known chromosome:GRCm38:4:87072442:87230423:-1 gene:ENSMUSG00000037996 gene_biotype:protein_coding transcript_biotype:processed_transcript	ensembl_cDNAncRNA		chr4	87072442	87230423	-	CATGTGCTTCGTTCCTTACTGCTCAGCTCGCAGCAGGGTGGATTTATGTCAGGAGTAGAATATGAGTTTCGTGTGCTGATTCTGTCTTTTGATGCCTCTGGCACAAACACCTTTTCCTATGAGGCAGGGGACAGAAAGGTTTCCATCTGTTTAGTATTTTCCCTTATCACTTTCAAAACAAAGTTGTGTGTGAAGATAAGTTGTATACCTTAAAAAAAGAAAAATAGAGTAAAGAACTCTATTCCAGGGAAGAGCTGTGAATGGTGTGAAGAATGGTATTCTCTGAATATCAGTGAAATGGTACTATTTTTTGGCAGTTGGGTGGGGAGAGCATCCATCCAAAGAGCCCATCATAACTTCTTGGGACCAGTAATTGGAGACCCAAAAGGCCTGGTTCAC…
ENSMUST00000134671:4492943	6.38559	4.25011	5.27514	4.29914	5.67214	4492943	222	ENSMUST00000134671	724	cdna:known chromosome:GRCm38:11:120611628:120613074:-1 gene:ENSMUSG00000025137 gene_biotype:protein_coding transcript_biotype:retained_intron	ensembl_cDNAncRNA	Pcyt2	chr11	120611628	120613074	-	GTGCCCATTGCTGTTACCTGGCCTGCTTTCCTCCTCTCCATCCATGGGGTTGGGGATGGAGCACAGGGCTCTGCGTATCCGAGGCCAGTGACCTCTTGCTGAACTACAACCCCAAGTCTTGCTCTCTTGAGACAGAATTTTCCTGTGTAGTCCAGGCTGACCTAGAACTTGCAATACTCCTGCCTCCGCCACGCAAGTGCTGGGTTTACAAGAACACCATGA
ENSMUST00000135061:4707117	2.46051	4.79468	5.0904	5.38339	3.89629	4707117	119	ENSMUST00000135061	526	cdna:known chromosome:GRCm38:12:84380358:84385410:-1 gene:ENSMUSG00000021236 gene_biotype:protein_coding transcript_biotype:retained_intron	ensembl_cDNAncRNA		chr12	84380358	84385410	-	TCCTTTAGTGTCCATTGAGCAAATACAGCACAGAGATGGGGCAAAGCTTCCATCCTTCCCAGGGAGTCAGAGAAACCACGTCACATTTGAAGAAGGCGGCTGTGGGCTAAAAACATCTA
ENSMUST00000135063:5337519	2.03855	3.23318	2.76815	4.25096	2.01804	5337519	55	ENSMUST00000135063	686	cdna:known chromosome:GRCm38:4:150244235:150246892:1 gene:ENSMUSG00000063524 gene_biotype:protein_coding transcript_biotype:retained_intron	ensembl_cDNAncRNA		chr4	150244235	150246892	+	GGGCTTCACACCAGTCCTTCTGTAGAGATGGATTCAGTTTGGTCAGGGTTAGGCC
ENSMUST00000135195:4827503	2.45004	3.94772	4.93263	5.73602	3.30117	4827503	59	ENSMUST00000135195	644	cdna:known chromosome:GRCm38:10:21996591:21998240:1 gene:ENSMUSG00000019970 gene_biotype:protein_coding transcript_biotype:retained_intron	ensembl_cDNAncRNA		chr10	21996591	21998240	+	GAAGAAGGTTGACTTTGTGACCTTGTATTGAGTTCTCCGCATCTAAATGAATATGTTTC
ENSMUST00000135488:4840930	4.7821	3.45612	3.08055	2.74712	4.26755	4840930	198	ENSMUST00000135488	1355	cdna:known chromosome:GRCm38:2:37634928:37703348:-1 gene:ENSMUSG00000026915 gene_biotype:protein_coding transcript_biotype:processed_transcript	ensembl_cDNAncRNA		chr2	37634928	37703348	-	GCTTGTGCAAGCCACCTATGATATTTAAAGTTTTGTTTTACATAATATATTTTGCAGTTTCAGATACCTGTGTTTATCATGTAGACTTTTTAGACTATGCTTTAATTTTTCTACCATTTTGGTGATTTGCTTTCCTTCATCTAGTATAACTTCAAGTCATTGGTATCAGCTAACCTGCTCTACTATACTGGCTTAGTG
ENSMUST00000135559:4831015	4.36552	3.07266	2.97963	2.17322	3.48943	4831015	301	ENSMUST00000135559	2868	cdna:known chromosome:GRCm38:6:125146026:125161776:1 gene:ENSMUSG00000038271 gene_biotype:protein_coding transcript_biotype:retained_intron	ensembl_cDNAncRNA		chr6	125146026	125161776	+	CGCAAGCTTATTGTCCCAGTCCCTGTGTCTAAGCCACCCCGCTCTCAGTCTTGAGCCACTGGGCCCTTCCAAAGAGATGCCTTCTTCCTTTCTGTTTCTTGTCCCCTTTCGCCCCCACCTCCCCGCCCCCACCCCCGTTTTAGTCTCTTCCTTCAGCGGCCTTCCAGATCTGGATGTGATTCTAGCTCTCCCATAGTAAAGACACGCCTCTCATCTTCCTCGCAGCTAGAATTGGGTTCAGTTGAGTCCTCTAATGAGAAAGACTTCAAAACTAAAGCAAACCCAGTTCTTCCGTAGTTGA
ENSMUST00000135943:5470717	4.35968	3.07093	3.28531	2.00984	3.5957	5470717	607	ENSMUST00000135943	2969	cdna:known chromosome:GRCm38:8:64724981:64733548:-1 gene:ENSMUSG00000031604 gene_biotype:protein_coding transcript_biotype:retained_intron	ensembl_cDNAncRNA		chr8	64724981	64733548	-	TGTGATTTGTGAACCACACGCTGTGATTGAAATGCATACAAAACGATTCCTCTTTTCTCTCAGTGCTTTAGAAAGTCCAAGATACAAAACTCTATTAACACATAGAATGCTATATTTTAACTTAAAATTTGCCCTTGCCTCCACAACAGGTGTGGCCTACACATGTGGTCCTAGTGCTTGGGTGGAGGCAGGAGGATCAGGTTCAAGGCTGTTCTCTGCTACTTATAGGACGTTTGAGGCCATAGGATACATGAGAAGCTAACTCAACACTGTTGCACACTCCCCCCTCATTCATCTATCATCGAGCTAGGGGCTAGACAGATGAGTGCTTAACGACACTGGCTGCTTTTCCAGATGTCCTGGGTTTGGTTCCCAGCACCCACAGGGCAACTCACAAAG…
ENSMUST00000135943:5475238	3.75189	3.3753	2.27061	1.67331	3.83378	5475238	263	ENSMUST00000135943	2969	cdna:known chromosome:GRCm38:8:64724981:64733548:-1 gene:ENSMUSG00000031604 gene_biotype:protein_coding transcript_biotype:retained_intron	ensembl_cDNAncRNA		chr8	64724981	64733548	-	ATGGGCTTGTGGTCAGATACTGGAATTGATGTTTTTCTAGGACATTGAATACACAACAGTACTGTCCAGTAGAAATATAATGAAGCCTAGCCCCACCTGTGTGCCCTGATCCTGATAAGAGAAACTATCTGGGGGGAAGGAAATGTTCACAGGGCTGCGTGGCTGCTCTGCTGCATTCCTTCTTCCTCCACACTCAGCCGATCTAACTGGATGGTAATATGCATAGACTCCATACACACATAATAGGAGTGACAGCAGCTTTC
ENSMUST00000136073:4732384	4.50548	2.3061	3.22713	2.48391	3.46126	4732384	90	ENSMUST00000136073	763	cdna:known chromosome:GRCm38:11:116165783:116167765:-1 gene:ENSMUSG00000020776 gene_biotype:protein_coding transcript_biotype:retained_intron	ensembl_cDNAncRNA	Fbf1	chr11	116165783	116167765	-	TCCTGGCAAGGGATTTGAGTCCGGATGTGGTTTCTCTTTCCAAATGGCTCCACTTGTCACCACTTCCAGGGTAAAGGATATGGTCTACTT
ENSMUST00000136149:5065907	2.1852	3.93113	4.14629	6.58364	3.47227	5065907	192	ENSMUST00000136149	687	cdna:known chromosome:GRCm38:4:32563097:32571617:-1 gene:ENSMUSG00000086150 gene_biotype:antisense transcript_biotype:antisense	ensembl_cDNAncRNA	BC024582	chr4	32563097	32571617	-	GCTGAATGACTCCTCACCCTGTAACATAGCCTTCAGTTCTAAGGTGGAGATTGACAGAGCCCAATCAGAAAAAACAAAACAAAACAAAAATAAACAACAACAAGAACAACAGACATGCATGTGGATGGCGTTGGTAAACTGACAGTTCCTAAGGAAGGTAATTTCTTGGGCTAAGTGTAAGGCTCTTTTCGA
ENSMUST00000136306:4638126	2.1642	4.84844	4.74571	4.88461	1.89629	4638126	65	ENSMUST00000136306	525	havana:lincRNA chromosome:GRCm38:4:3242437:3247486:1 gene:ENSMUSG00000085180 gene_biotype:lincRNA transcript_biotype:lincRNA	ensembl_ncRNA	AI838599	chr4	3242437	3247486	+	ATTTTGGGGCATCAAAACAAAGTTGTGCCATTTATGCTTTGTGTAAAAATATCCTTCGTGTCTTC
ENSMUST00000136365:4412532	1.60015	3.33867	4.05172	3.78186	1.8405	4412532	60	ENSMUST00000136365	1281	cdna:known chromosome:GRCm38:11:23666188:23673395:1 gene:ENSMUSG00000020280 gene_biotype:protein_coding transcript_biotype:retained_intron	ensembl_cDNAncRNA		chr11	23666188	23673395	+	GTAAGGTCATTTGCCCACTTCAGAGCACGTGTAAAATGTAAGCTAGGAGTTTCTAATTTC
ENSMUST00000136489:4748324	4.193	3.17697	2.53271	2.1627	3.21223	4748324	99	ENSMUST00000136489	416	havana:lincRNA chromosome:GRCm38:2:3925808:3929139:-1 gene:ENSMUSG00000086445 gene_biotype:lincRNA transcript_biotype:lincRNA	ensembl_ncRNA	Gm13191	chr2	3925808	3929139	-	CTGTACGGAGACAAGCGTGTGAATCTTTTGGGAAATGCAAATCCAAGCCTCAGTGGGAGACTGCCTCACATGCATTGTAATGACTGCTGACCCAAAGCA
ENSMUST00000136736:4803322	5.11018	4.26025	3.71847	2.95769	4.58173	4803322	57	ENSMUST00000136736	648	cdna:known chromosome:GRCm38:7:141339004:141355792:1 gene:ENSMUSG00000025504 gene_biotype:protein_coding transcript_biotype:retained_intron	ensembl_cDNAncRNA		chr7	141339004	141355792	+	GTAAGTGTTGTCCTACCGCCTCAAGTCCCCAGGGAGGGGTGTGACATGAGCCCTGCC
ENSMUST00000136843:5221846	1.97775	3.19945	3.15364	4.30359	2.44801	5221846	224	ENSMUST00000136843	797	cdna:known chromosome:GRCm38:4:129593329:129595768:-1 gene:ENSMUSG00000028798 gene_biotype:protein_coding transcript_biotype:retained_intron	ensembl_cDNAncRNA	Eif3i	chr4	129593329	129595768	-	GAGGGTCTTATGTCTGTTTCTGTTCTGGGACACTCGGGAGGCATGGAGTCTGAGGGGAGACTTAGCGTGGAACCCACTGTGCTTAGAGCCTCATTAGCAGGACTCGTGGGGAAGCAAGCACTCCTGGAAGGGCTGGGAGAACAGCCAGAGAGTGGCAGCGGGCAGGAGAGCGCTGACCTGCAGTCACCAGAGAAGGAACACTGTGAGACTGAGCGTGACTGGTC
ENSMUST00000137153:5171671	5.33201	4.07038	2.87078	2.05342	3.30741	5171671	109	ENSMUST00000137153	2138	ensembl_havana_lincrna:lincRNA chromosome:GRCm38:X:61116386:61120651:1 gene:ENSMUSG00000071753 gene_biotype:lincRNA transcript_biotype:processed_transcript	ensembl_ncRNA	C230004F18Rik	chrX	61116386	61120651	+	TTCAAGATGGTTACATTCCACAATAGTACTTTTACCTTCTTGCCACATCATGCAGCCTGCTAAACCATTGTGTTTATATATTTTACCTTTCAAGAATCCTAGCTGTATA
ENSMUST00000137153:5294772	8.48187	7.54523	7.17248	5.42837	6.98568	5294772	486	ENSMUST00000137153	2138	ensembl_havana_lincrna:lincRNA chromosome:GRCm38:X:61116386:61120651:1 gene:ENSMUSG00000071753 gene_biotype:lincRNA transcript_biotype:processed_transcript	ensembl_ncRNA	C230004F18Rik	chrX	61116386	61120651	+	ACAAATGGCCTAGTTTCAAAGCTCCATCTCTTTCTTGATAGTTGTATGAAATTCTTTAGTCATCCTGTGTCTCAGCTTCCTCAGCCATAAAATATGAATAATAACAGCACATTTAGAAAAATGTTACATATTAAACATTAAAAAGTATTCCTTATTGTTATTTGTAGATGTCAAAAAATTATGTGGCACAGACTGGTGCCTGCACTGTACAGCCAATGCTGAACAAATTACAGACACAGGCATTTAACCCTACAGAATGCAGACACCTCACATAGCCCACAGATGACCTACAGCAGAGTGTTGCACTCTCCTGAGGCTCATTACTATATACCATAGCAAAAGAATAGCCCCTTATCACATGGACACCTTCCATGACATTAGGCTCTTTTAGATTGCACA…
ENSMUST00000137483:4338585	2.20595	4.12518	4.45206	4.95959	3.86596	4338585	256	ENSMUST00000137483	2961	cdna:known chromosome:GRCm38:6:90369618:90374551:1 gene:ENSMUSG00000034430 gene_biotype:protein_coding transcript_biotype:retained_intron	ensembl_cDNAncRNA		chr6	90369618	90374551	+	TCTGGCATGTAGCTTGGCCTCACTAAATGACAAATAGCTAGCTTATTGCACCTGGACAGAAATAAAGCTTGTCTGATTTTTTTAATAAGGGTATACATGAGGCTTTGTCTTGGTTAGGGTTTCCTCAAACACCTCGACCAGAAGCACCTTGGAGAGCATCTCAGCTTACACTTCTATGTGACAGACCATCATCAGAGAGTCAGGGCAGGCACTCAAGGAAGGGACCTAGAGGCAGGAGCTCGTGCTAAGGCCATAA
ENSMUST00000137657:5238254	1.96604	2.50137	2.83617	4.302	3.01121	5238254	161	ENSMUST00000137657	3801	cdna:known chromosome:GRCm38:15:91808238:91816026:1 gene:ENSMUSG00000036273 gene_biotype:protein_coding transcript_biotype:retained_intron	ensembl_cDNAncRNA		chr15	91808238	91816026	+	AGTTCTCAGCGTTTGGGCCATAAGTTGTTCTCCAGTTTGTCTCACATTGGAAAAAGAACCCTCAAGAATGCAAGCCAAGTAGACTCTCTTGCTGAAAGTTTTCCGGCCCTCCCTATTGTGCTATATTCATTGTTTAGTTCAGCTCAACTGTCCGGATTCAA
ENSMUST00000137804:4904963	2.51202	3.58443	3.79091	4.82388	5.06984	4904963	327	ENSMUST00000137804	2304	cdna:known chromosome:GRCm38:12:119201463:119238770:-1 gene:ENSMUSG00000025321 gene_biotype:protein_coding transcript_biotype:retained_intron	ensembl_cDNAncRNA	Itgb8	chr12	119201463	119238770	-	AGATCTTGTCCCTGTCATGTTTGTAGCTAAACTGTATGACCCGGGACACATTAGAAACCTTATTTCAACCTATTGTAACTCTGTGTTCTGATCTTATGGTACAGTCACACTGTGATGTAATTATGCTATGAATCCAATGAAGCTCTGGAGAAAGGGAACTTTTTCTTACATTTAGTTATTTAGTTGGTAGAGGGCAAAGAGGCACACACATGCCACAGTGCACCTAGAGGTCAGAGAATAAGTTGCAGGAGTTCTCTCCTTTAGCCATGTATGTATGATAATTGTATGGCCATTGTCAAGCCTGGTAGCTCCAAGCCTGTCATACTT
ENSMUST00000137815:4910195	5.19257	4.5185	3.4149	2.84893	4.51609	4910195	55	ENSMUST00000137815	634	cdna:known chromosome:GRCm38:11:35826495:35834461:-1 gene:ENSMUSG00000018848 gene_biotype:protein_coding transcript_biotype:processed_transcript	ensembl_cDNAncRNA		chr11	35826495	35834461	-	TGCCTCCATCTTGAAGTGCATTTTCTTCTTCTGTGTCTCTCAGGCTGGGTTTACA
ENSMUST00000138093:4594265	7.66806	6.67339	5.52846	3.82702	6.65275	4594265	125	ENSMUST00000138093	527	cdna:known chromosome:GRCm38:11:65719539:65745838:-1 gene:ENSMUSG00000033352 gene_biotype:protein_coding transcript_biotype:processed_transcript	ensembl_cDNAncRNA	Map2k4	chr11	65719539	65745838	-	TGTTATCGGGATATGTGCATGTTTATTTTCTTGTCTAAGGAAGATTGGCAAGTGTGTGTGTGTGTGTGTGTGTGTGTGTGTGTGTGTGTGTATACACATGCGTTGGGAGAGTTAAACAGCTTTGA
ENSMUST00000138368:4551250	4.26854	2.91149	1.605	1.91733	3.27126	4551250	157	ENSMUST00000138368	698	cdna:known chromosome:GRCm38:2:65682280:65683866:1 gene:ENSMUSG00000075318 gene_biotype:protein_coding transcript_biotype:processed_transcript	ensembl_cDNAncRNA		chr2	65682280	65683866	+	TTATATGGTGTTGGTTTCGATTAGCTTTTAGGTAATAACAATAACTCCCAATAGCAGCTCAGTTGGTGTCAATGCCATTCTCCCCTTAACTGGGAAATCTGGTGACAACACTCACTGAAGTTGAAATGATCTTGATTCAAGACCAACACAGATGTAG
ENSMUST00000138813:4679636	3.18916	4.48013	4.68183	5.40508	3.81914	4679636	55	ENSMUST00000138813	367	cdna:putative chromosome:GRCm38:15:85735639:85777727:1 gene:ENSMUSG00000022383 gene_biotype:protein_coding transcript_biotype:processed_transcript	ensembl_cDNAncRNA	Ppara	chr15	85735639	85777727	+	TGGAGGGCACGCGCGAGGGCGGGGAGCCAGGCGTCCCCTGTCCCGGGACAGTGAG
ENSMUST00000139201:4635774	3.43459	4.18576	4.10924	8.15273	7.01596	4635774	221	ENSMUST00000139201	640	cdna:putative chromosome:GRCm38:6:4534904:4535885:1 gene:ENSMUSG00000029661 gene_biotype:protein_coding transcript_biotype:processed_transcript	ensembl_cDNAncRNA	Col1a2	chr6	4534904	4535885	+	CTCTGTGATGTGAAATCCTGGCATCATTTATCCCCTCAAGAAGAATGGAACTGTTCATAGGAAGTTCATGAATCGTTTCGTTTAACCCTATACATGACAACAGCTTGAAACCGTCTTTTACCCAGGAACTATCAGCTTTATGAATTAATTTTATTTGTGGTGCATTGGATCCCATCAGACCTTCCTCTCACTCCCAGACACAGCCACATCCACAGAACTGA
ENSMUST00000139460:5334905	3.66045	3.87058	5.87191	6.52253	4.01986	5334905	86	ENSMUST00000139460	796	cdna:known chromosome:GRCm38:11:98993467:98995370:-1 gene:ENSMUSG00000020914 gene_biotype:protein_coding transcript_biotype:processed_transcript	ensembl_cDNAncRNA		chr11	98993467	98995370	-	CCAAGTGAGTAGAGCCCGTGTGGCCTTCAGCTTTGCTCTCTGTAACATGCTGTCGAGGTGACCATCTCATGGGCAATTGTCTTCTC
ENSMUST00000139492:5285939	2.75213	2.6493	3.10661	6.59996	6.49326	5285939	90	ENSMUST00000139492	529	havana:lincRNA chromosome:GRCm38:2:84501171:84531322:-1 gene:ENSMUSG00000087362 gene_biotype:lincRNA transcript_biotype:lincRNA	ensembl_ncRNA	Gm13710	chr2	84501171	84531322	-	AGCTGGGAGACAAAATGAACCTCTCCTCTTTAAGTTGCTTTTGACAGATCACGGCAATGAACAAAGTAACTGACAGACCATGTAACCCAG
ENSMUST00000139744:4486327	4.28699	1.67735	2.02567	1.36802	1.87352	4486327	166	ENSMUST00000139744	898	cdna:known chromosome:GRCm38:X:8203439:8206513:-1 gene:ENSMUSG00000031169 gene_biotype:protein_coding transcript_biotype:retained_intron	ensembl_cDNAncRNA	Porcn	chrX	8203439	8206513	-	TTCATAAACCAACCACCATACAGTGCAGGCTTCCCTTTCCCCTGACATCTTTGTCTCTGTCTCTTTCTACCTATCACTGTGTCTCCCTTCTCCTCTCATCTCACACTTGGTGCGCCCTATCTTTCATGGTGACATGCTTTCTTATCCATACACTTGACCATGGGCC
ENSMUST00000139975:5119572	6.83156	6.34246	5.40468	4.01901	6.11663	5119572	217	ENSMUST00000139975	593	cdna:known chromosome:GRCm38:2:113827340:113828762:-1 gene:ENSMUSG00000023236 gene_biotype:protein_coding transcript_biotype:processed_transcript	ensembl_cDNAncRNA	Scg5	chr2	113827340	113828762	-	TGGTGCCCGCATCCAGCCCTTTTATCACAGCGGTAGATTGTGCTGTTAAAATAGCGGTCCTTGGCTCTTTGAAGAGCATGGTTTTAATGTCTGTGAGTTGCAAGGAAAGGCCGTTAGCTGCAGACAGATAAAATGAAGTATTTGTTTTAGGGAAGATATTTGGCTTGTTCCCTACCTTTTTATTCCCTATTCCCGTGTGAATGCTCAAAAGGGTTTA
ENSMUST00000139982:5367013	1.82983	6.54614	8.11565	8.838	7.74293	5367013	383	ENSMUST00000139982	1215	cdna:known chromosome:GRCm38:10:51480678:51485748:1 gene:ENSMUSG00000089672 gene_biotype:protein_coding transcript_biotype:processed_transcript	ensembl_cDNAncRNA		chr10	51480678	51485748	+	CCTCTGGCTCTTCATAGGACTGTGAACAAAGCAAAGAACAGAACTCCTCACCCACTCCAAGCTCACCTCAAGGCTAGAAAATGAGATGTGTATGACTGAAGAAAGTGGTGTGGAAAATTAAACAGAAAATACTTAGTGTTTGAGGCACACAGGGCTGTTGTGAATCCTAAGAGAAGACTCTGCTAAGTTAATTCTGAGGATAACCCTAAATGGAGAGGTCCACACAGACATCTAATGAACTAGTGCACATAGGCAGAAAATACAGCAGATACAGTCCTCAGACATGAAAATGGGAATCAGTGTGACAATAAAAGGCTGGAACTATGAGAAGGAAGCTTCCAGACTCCCCAAGTTCTACAGGCCACAGCAGAAATGATATAATG
ENSMUST00000139982:5487201	2.57065	6.23311	8.18323	8.30845	7.70802	5487201	450	ENSMUST00000139982	1215	cdna:known chromosome:GRCm38:10:51480678:51485748:1 gene:ENSMUSG00000089672 gene_biotype:protein_coding transcript_biotype:processed_transcript	ensembl_cDNAncRNA		chr10	51480678	51485748	+	CCTCTGGCTCTTCATAGGACTGTGAACAAAGCAAAGAACAGAACTCCTCACCCACTCCAAGCTCACCTCAAGGCTAGAAAATGAGATGTGTATGACTGAAGAAAGTGGTGTGGAAAATTAAACAGAAAATACTTAGTGTTTGAGGCACACAGGGCTGTTGTGAATCCTAAGAGAAGACTCTGCTAAGTTAATTCTGAGGATAACCCTAAATGGAGAGGTCCACACAGACATCTAATGAACTAGTGCACATAGGCAGAAAATACAGCAGATACAGTCCTCAGACATGAAAATGGGAATCAGTGTGACAATAAAAGGCTGGAACTATGAGAAGGAAGCTTCCAGACTCCCCAAGTTCTACAGGCCACAGCAGAAATGATATAATGTGATAAAGTTCCAAAA…
ENSMUST00000140047:5100480	4.54066	3.47846	3.47217	2.02346	3.61556	5100480	190	ENSMUST00000140047	435	cdna:known chromosome:GRCm38:7:138846860:138869802:1 gene:ENSMUSG00000041769 gene_biotype:protein_coding transcript_biotype:processed_transcript	ensembl_cDNAncRNA	Ppp2r2d	chr7	138846860	138869802	+	GAGACTGCGGCTGAGTCCCGCTTCGGGGATCTGTTGGGGAGACGGCGGTGGACGCTAGCCTTGGGAGGCTATGGGGATGATGGCCATGACGCCGGCCTCAGGGGTCGGTGGGCACAGATGGCCATGGAGGCCAGCCTCGGGAGGCTATGGGGAGACGACCGTGGACGCCGGCCTCGAGGGTCTGTAAGAA
ENSMUST00000140130:5596476	6.00363	5.34163	5.21082	3.45475	5.54568	5596476	53	ENSMUST00000140130	644	cdna:known chromosome:GRCm38:X:74021000:74022651:-1 gene:ENSMUSG00000031392 gene_biotype:protein_coding transcript_biotype:retained_intron	ensembl_cDNAncRNA	Irak1	chrX	74021000	74022651	-	TGTAACATTGGGGTAGACACCTGGAAGACAATCTATCAGTCCTTATTTGTCTA
ENSMUST00000140605:4700481	4.91234	3.32108	3.20658	2.55428	3.88538	4700481	107	ENSMUST00000140605	268	cdna:known chromosome:GRCm38:4:127054288:127057573:-1 gene:ENSMUSG00000043872 gene_biotype:protein_coding transcript_biotype:processed_transcript	ensembl_cDNAncRNA	Zmym1	chr4	127054288	127057573	-	TTTGAAAAAACTGAGGCCCTGAGGAATTAAGGCACTGTGTTGCTATGGTTAGCATATACGCACTACATTTCTTCAGCCCCAGCTTTGCTACATGTCACAGGCGTTGA
ENSMUST00000140705:5104877	5.13011	3.67019	3.9423	3.05488	3.56189	5104877	267	ENSMUST00000140705	691	cdna:known chromosome:GRCm38:19:56792962:56797508:-1 gene:ENSMUSG00000035173 gene_biotype:protein_coding transcript_biotype:retained_intron	ensembl_cDNAncRNA		chr19	56792962	56797508	-	GCCTGCCATTTGCATGGCCTCAGAATTGGATGAAGAGCTGATCTTTTCCATGGGGTACATCATGTTGTCCAGGCTGGCCCTGCATTCCTGGGCTCCAGGGGTCCTTCTGCATCAGCTTCTTGTGTAGCTGGGATGGCAGTGCTCTGCCTGCTTAGTAATTCTTCTCCCATCCAAGTCTCCATCTTTTTGGATCACCTGTTGTATTCTAGCTTTGGGGATACAGAGATGGGAGAAAACCTTAACGGTAGATATTCTCCTTCAAGGTAG
ENSMUST00000140733:5119048	6.17759	3.34054	3.82145	3.96101	4.89616	5119048	156	ENSMUST00000140733	854	cdna:known chromosome:GRCm38:2:25057576:25059659:1 gene:ENSMUSG00000006476 gene_biotype:protein_coding transcript_biotype:processed_transcript	ensembl_cDNAncRNA	Nsmf	chr2	25057576	25059659	+	GTATGCCATGCCGTGTGCACTTAGGGGCACAACCATTGTCCTGGGGGCCCTCCCACCCTTGGACAGAATTCTGCAGGTCAGGGATCCTGGGCCTGGGCAGTGAGTAGTGCTAAGCTCCCATTAGTCCAGACTCCTGTGGACAACTAGGCTGCAGCA
ENSMUST00000140911:5328096	4.00614	2.36783	2.9545	1.88034	2.80979	5328096	85	ENSMUST00000140911	918	cdna:known chromosome:GRCm38:7:34116630:34132818:-1 gene:ENSMUSG00000036459 gene_biotype:protein_coding transcript_biotype:retained_intron	ensembl_cDNAncRNA		chr7	34116630	34132818	-	CGGGAACCTCCTTCGGACTCACATGCAGACCTGAGGCCAGCGACAGTGAGTGCCCCTTTGTCACGTGACGTCCTGGATCCTGTGT
ENSMUST00000141330:5521400	8.13323	7.43438	7.31399	5.90256	6.81229	5521400	55	ENSMUST00000141330	923	cdna:putative chromosome:GRCm38:1:23848533:23909703:-1 gene:ENSMUSG00000026155 gene_biotype:protein_coding transcript_biotype:processed_transcript	ensembl_cDNAncRNA		chr1	23848533	23909703	-	GCCTTTGGTATCCTCTCCTTCTCTGCAAGCTGCTGTTGATAAAAACAAGTTAGAG
ENSMUST00000141432:4923777	1.73342	3.14595	3.76049	4.15078	2.05422	4923777	91	ENSMUST00000141432	1630	cdna:known chromosome:GRCm38:14:20424908:20452226:-1 gene:ENSMUSG00000039543 gene_biotype:protein_coding transcript_biotype:retained_intron	ensembl_cDNAncRNA		chr14	20424908	20452226	-	GTGCTTGCTTATGCGTAATCTACGACCTTGGGCAAGCTTGTTCACTGAGACCTCAAAGGGAGTTTGCACTAGACAGTGGTTAGGCTCCTTC
ENSMUST00000141569:4945390	2.11078	3.19927	2.94762	4.53146	2.73013	4945390	57	ENSMUST00000141569	482	cdna:putative chromosome:GRCm38:10:22705523:22706385:-1 gene:ENSMUSG00000071359 gene_biotype:protein_coding transcript_biotype:processed_transcript	ensembl_cDNAncRNA	Tbpl1	chr10	22705523	22706385	-	TCATGTAAATGATCGAGTTCCGTGGGCTAATTATTACTACATTGCATGGCCTCATCA
ENSMUST00000141677:5603173	7.89752	6.05015	5.82935	5.06523	7.10194	5603173	206	ENSMUST00000141677	832	cdna:known chromosome:GRCm38:X:152619123:152644110:-1 gene:ENSMUSG00000045180 gene_biotype:protein_coding transcript_biotype:processed_transcript	ensembl_cDNAncRNA		chrX	152619123	152644110	-	CATGTTTAAGGGCACAGGCAGTTTTTTCAGCCTGGGTTTTTTAAAGCTGGATAAAAAGCACGTTGGAACTGAAAGCTGTCGTCCCTAACTGGTGGGACTGGTAGCCCTTGCTGTGTGGAAAAATAGCTCTGTGTGAGTTCTGCACATGGATGACCCAAGAACGCAGGCAGGAGGGATCTGTGAAGACTTGTCTGCGTTGCCGTTTC
ENSMUST00000141770:5400294	5.38303	3.92022	4.65153	3.13388	4.18676	5400294	70	ENSMUST00000141770	1822	cdna:known chromosome:GRCm38:5:135106891:135123042:1 gene:ENSMUSG00000005373 gene_biotype:protein_coding transcript_biotype:retained_intron	ensembl_cDNAncRNA		chr5	135106891	135123042	+	TCAGTGGGACTGACACCTGCAGACCTTGGGTCTTAAGAGTCCTGGAGGGGATCGCACGACCTCACCCTAA
ENSMUST00000142084:5072442	4.64657	2.7532	3.12058	2.47144	4.77597	5072442	952	ENSMUST00000142084	2039	cdna:known chromosome:GRCm38:14:21842275:21845519:1 gene:ENSMUSG00000021771 gene_biotype:protein_coding transcript_biotype:retained_intron	ensembl_cDNAncRNA	Vdac2	chr14	21842275	21845519	+	TTTCACACCCAAGTAGAGCAGCGCCAGAAGCACTGGTTTTATCTTGTGTATGACAGGACTAGAGTCACTGAATCACTGCATATCCACTCACACAGCACGCTGCTGCTGCTCCCTTTATACCTGTAGCCCCAGGATGCTGAGGAGCTAGCTCTGGGGTTGAGGGGAGGGGAGTGGGCTCCCCCAGCCTCTTCCCCCCCCCCCCCCCGCTTACCTGTGCATCCTGTGGCTTGCAGGCTATTTGTGTTCTGTATTTGTAGGTGAAGATGTAACAGTTTGGATACCTCTGTTAGCATGAAGGTGGCTTAGTGGAGATGTTAGCTGAGGTCGTGGAGACTGACATTAGAAGGAATGTGGGTCGTGCATGTTCCTGCCCAGCAGCCCTTTGGCTTGAAGAGTGAA…
ENSMUST00000142142:5174530	3.12373	5.84559	5.75886	6.30832	6.09751	5174530	86	ENSMUST00000142142	916	cdna:known chromosome:GRCm38:X:74270956:74272223:1 gene:ENSMUSG00000008682 gene_biotype:protein_coding transcript_biotype:retained_intron	ensembl_cDNAncRNA		chrX	74270956	74272223	+	GTGGCGTTACCCAATACTAAAGCGCTTGGGTAGAACTAGCATGTCCGTGTGCATCCAATCCTCTGCGTCGCAAATGAGCCTTTTTA
ENSMUST00000142219:4857281	2.37938	3.05501	4.39038	4.50982	2.81384	4857281	147	ENSMUST00000142219	604	cdna:known chromosome:GRCm38:2:32217212:32219156:1 gene:ENSMUSG00000039262 gene_biotype:protein_coding transcript_biotype:processed_transcript	ensembl_cDNAncRNA		chr2	32217212	32219156	+	GAGCTGGCGTAAGAGTCACCTTTGAGCTGCTATTGCCTGGCACCTGTGTGCTCTGAATAAAATGAGTTTGGTGGCCTTCTTAGATCCATGCAGTGTCTAGTGGTCATGAGCTTACATAGAATTGGCGCATTCATTACACTTGGTGTG
ENSMUST00000142751:5150717	2.32756	3.04233	2.87859	4.66227	3.20772	5150717	124	ENSMUST00000142751	1648	cdna:known chromosome:GRCm38:11:118444200:118454995:-1 gene:ENSMUSG00000086514 gene_biotype:antisense transcript_biotype:antisense	ensembl_cDNAncRNA	Gm11747	chr11	118444200	118454995	-	TAAGGTAGCATATCCTGATCTGGCCTTGAGCTTGTTGAGCGAGTTCAACAACAGAAGTCTGCTGGTTTGGATACCAAGACAACAAAACCTTTGTTTTAAGCTGCCACGCTTTTGTCTCAAGTCA
ENSMUST00000143161:4416668	4.07741	4.23776	2.75915	1.86633	3.56531	4416668	601	ENSMUST00000143161	2447	cdna:known chromosome:GRCm38:1:180111357:180116307:1 gene:ENSMUSG00000026490 gene_biotype:protein_coding transcript_biotype:retained_intron	ensembl_cDNAncRNA		chr1	180111357	180116307	+	TCTGGTTGAATAGCCCATGGTGTTCTTGATTTAAGAATCCTCTTGCCCACTTCCCCAGAGTGCTAGGATTGCATTTATTAGCACTGTCTATGGACCTACAGTATACAAAATCTTATGGGTATAGGAAAAACAATCAGGGAAACAATATAAAACTCAAGATTAATTATTTTACTAATGAAGAATTTTTGGGTGTTTGTTGTCTTTTTCCAGGTTGGCTGATGCTTACATTGTTTGTCCTTTTTGATTTACCAGATTTACTAGTATTTTTTTTGAGAACTTTTGTTCTTCTTTTTACATGTACCTAGCTCAGCGCATGTCATAACTCTATGATATAAACCTCTTATACAATTTTTCCATAATGTGGACATTATAAGGGTGATGATTTAGTAAAAATAAACT…
ENSMUST00000143645:4568554	5.01988	3.53711	2.49699	2.63369	3.9906	4568554	216	ENSMUST00000143645	804	cdna:putative chromosome:GRCm38:2:167201576:167202799:1 gene:ENSMUSG00000086098 gene_biotype:antisense transcript_biotype:antisense	ensembl_cDNAncRNA	Gm14291	chr2	167201576	167202799	+	TGTGTCTGCACCACGCTTGGGTGTCTCTGGCTGTCAGCTCTCCAGTGCCAAACAGAAGTGTCCCACTGCCACCCCTAAAGCCCTCGGAATGAAGAACAAACTGCCCACCCAACATCTGCTTCTAGGAGAGGTGTGTAGGCTGAGCTCTACTGGCAAGAGCTGTGTGACCCCAGGCAAGTCACTTGACCTCTCTGAGCTAGCATTCTCATCTGGAAA
ENSMUST00000143887:4441885	8.35496	6.39929	6.84307	5.85115	8.23247	4441885	61	ENSMUST00000143887	757	cdna:putative chromosome:GRCm38:11:96261610:96264868:1 gene:ENSMUSG00000078706 gene_biotype:protein_coding transcript_biotype:processed_transcript	ensembl_cDNAncRNA		chr11	96261610	96264868	+	TTCTACTTGGCTCCACTCTCCTGTCTACTCCCCTGTCTCAAGGCTGGGGTTGCCTTAGAGT
ENSMUST00000143933:4527852	1.52698	4.27748	3.887	4.06359	1.8784	4527852	109	ENSMUST00000143933	596	cdna:known chromosome:GRCm38:13:47101487:47106154:-1 gene:ENSMUSG00000021377 gene_biotype:protein_coding transcript_biotype:processed_transcript	ensembl_cDNAncRNA		chr13	47101487	47106154	-	TTGATAAACATCTCTACAATGTTTTTTGATCCTTAATATATTAAGATGCTTCACCTTAGAGCTGTAATTTTCATTCTGTAAGACTTTAATGATTAGCTAGTTCAATTTC
ENSMUST00000145363:4350253	7.97259	6.55874	6.01287	5.19003	6.52907	4350253	256	ENSMUST00000145363	5974	cdna:known chromosome:GRCm38:5:115925641:116006794:1 gene:ENSMUSG00000029516 gene_biotype:protein_coding transcript_biotype:processed_transcript	ensembl_cDNAncRNA		chr5	115925641	116006794	+	TTTCTCAGCATGACCCAGCCGGATGTCCACTTCTTCCGGCAGGCGGCCTGGGTCCTCACCTGGGCCTGAGACGCGTCCCATCTGCTCGGAGCGAGGCGAAGCGTGTCTTGCCAGTCCTTTAAAACTTCTGCTCGTGTCCCTGCGGCCACTGTGCTGGCTATGTTCTCGTCTCTTAATGCTCACTGTTCCTGCCCAGAGGCAACTCTCTGAAAAAAAAACATATTAAGAGAGACCACTGCTTGTGTGGGACACCTGA
ENSMUST00000145560:5559658	5.03687	4.0089	2.92699	2.577	4.10591	5559658	257	ENSMUST00000145560	3283	cdna:known chromosome:GRCm38:4:83658379:83864731:1 gene:ENSMUSG00000052407 gene_biotype:protein_coding transcript_biotype:ambiguous_orf	ensembl_cDNAncRNA		chr4	83658379	83864731	+	ACGATGGCCGTGTGATACCTTCCTCTCCATCTCTTCCGTAACACTGATTGTTTGAATATTAGAAATAATTCAAAGTCTCTTGGTTTTAAAATTTTCTGTTATTTTTTTCCTATTTTATTTTTTATTGAAAATAGACTTTTTCAGACAGTAGATCCTGAGTAGTTCCCCCTTCCCCATCGCTTCCCAGAACTCCATTTCCTTGCCTACCCGAATCCTTACCCTTTCTTTGTCTTTTTCATTAGCAAACAGGCCATCTA
ENSMUST00000145742:5601010	5.80898	4.28912	3.58851	3.71921	4.57304	5601010	162	ENSMUST00000145742	2347	cdna:known chromosome:GRCm38:2:27021363:27027922:-1 gene:ENSMUSG00000036067 gene_biotype:protein_coding transcript_biotype:processed_transcript	ensembl_cDNAncRNA		chr2	27021363	27027922	-	GCTGCTCCACACAGGTCTGCTCATGCTCCAAGCACAGAGGAGCCCACCCACCCACCCAACTCAATGGTGTGGCAGGAGACCGTGAGCTTGCCCTTCTGTGTTGGGGGCAGAGGTGTAGTGGGGCTCGCAATAGACCTCACACTCGGAGGAATCTGGTCCTGA
ENSMUST00000145846:4814884	4.30196	9.21312	9.27012	9.30342	8.0283	4814884	231	ENSMUST00000145846	931	cdna:known chromosome:GRCm38:11:86585020:86586994:-1 gene:ENSMUSG00000018171 gene_biotype:protein_coding transcript_biotype:processed_transcript	ensembl_cDNAncRNA	Vmp1	chr11	86585020	86586994	-	AGTGGTGATAAATGTGGGACTTCTCAGAAGTCATTCATTTTATTCTTTGTGCCACAGCAGTGTGCAGTCTCAGCTGCACTAGCCTCGCCCTCCTGACATAGCAGTGGCTCTGAGCTCTCTCCTACTTTCTCCCAAATGCATTACTGCTGGCGAGACCTCTAAGGAGTTCAGGAGGAATTTTATCACTATCCAAGCTTCACAGGATTGCTGTGACCCTGATTGTTGAATTTT
ENSMUST00000145885:4921971	4.17005	2.87879	1.78242	1.99801	3.73399	4921971	148	ENSMUST00000145885	899	cdna:known chromosome:GRCm38:2:32308924:32310635:-1 gene:ENSMUSG00000026825 gene_biotype:protein_coding transcript_biotype:retained_intron	ensembl_cDNAncRNA	Dnm1	chr2	32308924	32310635	-	GCATGTGTGTTAACGTGTGCACGCAGGGCCTTAAGGCCTCACAGCATGTGTGTGCACGCCCAGGCGTGTGCGTGTGTGTGTCCCCTAACCCCCAGCCTGGCCCACCTGTGTGTTTGTGAACTGCCCTGTTGATTTCGTGCTGTCTTTC
ENSMUST00000146180:5193963	4.77118	3.60764	2.83186	2.76136	3.96248	5193963	76	ENSMUST00000146180	771	cdna:known chromosome:GRCm38:10:80132536:80134681:-1 gene:ENSMUSG00000035640 gene_biotype:protein_coding transcript_biotype:retained_intron	ensembl_cDNAncRNA		chr10	80132536	80134681	-	TGGCCCTGTGGACACGAACTCGAGTCACCCTGGCCACCTCGTGGGGGCCACCTCTCCAACGCAGACCGGAGAAGGA
ENSMUST00000146204:4797385	5.42076	4.40281	3.01849	2.76218	4.22521	4797385	183	ENSMUST00000146204	527	cdna:known chromosome:GRCm38:2:165852034:165879902:-1 gene:ENSMUSG00000039671 gene_biotype:protein_coding transcript_biotype:processed_transcript	ensembl_cDNAncRNA	Zmynd8	chr2	165852034	165879902	-	GAGCGTTTCCTAGTTCTGATGTTTATGAAGGCGGCTTTGGAGCTAGCAGGGCTCCTTAAACATGAGCTCAGCTATTGAACACACTGCTACCATTTTAGTTCAATACAGGAATGAGGCACTGTTGCCAGCCGCCATTTTAAGAATCCTGCATAAATAGCTTAGCTCCGATGACTGCCCGTTTTA
ENSMUST00000146286:4883320	3.41376	5.9027	5.91931	5.57967	3.68798	4883320	158	ENSMUST00000146286	538	cdna:known chromosome:GRCm38:7:101896408:101898227:1 gene:ENSMUSG00000030649 gene_biotype:protein_coding transcript_biotype:retained_intron	ensembl_cDNAncRNA	Anapc15	chr7	101896408	101898227	+	CAGTGCAGCATGGAGGTCTACCACCGGGCCGTGAGCTTGCCTTACGCTGGAGACCTGCTTAGAAAAAGGTTCCTCTGTGGGGAATAGTCAAGCTGAGTTTTGGGGGATAAAGTTCTTATTTTGTGGCACCCTAACTCGCTGAGGGACCATAGGATTTC
ENSMUST00000147107:5238812	4.83668	3.68718	3.88044	1.86559	5.40569	5238812	60	ENSMUST00000147107	1968	cdna:known chromosome:GRCm38:2:165444103:165473199:-1 gene:ENSMUSG00000018459 gene_biotype:protein_coding transcript_biotype:retained_intron	ensembl_cDNAncRNA		chr2	165444103	165473199	-	TCAGGTGTCTAAGTCTGGTCCGGGAGAATTTAGTGGAAATATGGGGGCTCTTGTGGTTCT
ENSMUST00000147162:5121850	2.47806	5.0752	5.39996	5.84094	4.05985	5121850	116	ENSMUST00000147162	1876	cdna:known chromosome:GRCm38:10:80642623:80644632:-1 gene:ENSMUSG00000003344 gene_biotype:protein_coding transcript_biotype:retained_intron	ensembl_cDNAncRNA	Btbd2	chr10	80642623	80644632	-	GGCAGCAGGAACTGCGCATGCGTTAGATGAGGCTTTGGTCCAGAATGGGCAATGTGACGTCCCCACAGCTCCAGGTTGCTCCATGGCCATTGTAGCTGCTCAACTTTATGGGCTCA
ENSMUST00000147410:5216089	5.59709	4.53285	3.46135	3.05385	3.94505	5216089	67	ENSMUST00000147410	1781	cdna:known chromosome:GRCm38:11:96346829:96354691:-1 gene:ENSMUSG00000084844 gene_biotype:antisense transcript_biotype:antisense	ensembl_cDNAncRNA	Hoxb3os	chr11	96346829	96354691	-	CTTCGGGTCACGTGACAGCCTCATTGTAGCTCCGGAAGAGAACGTGAAGTTTAGGTTGCCTGGAAGA
ENSMUST00000147943:4468847	5.72627	4.25561	4.0054	3.72497	5.26455	4468847	60	ENSMUST00000147943	747	cdna:known chromosome:GRCm38:7:109027223:109029360:1 gene:ENSMUSG00000031028 gene_biotype:protein_coding transcript_biotype:retained_intron	ensembl_cDNAncRNA	Tub	chr7	109027223	109029360	+	CATGCCATGAATGCTGTGTAGGCTCCTTGGAAGAGAAGGCGCTGTCCTGTGCCATGGGAA
ENSMUST00000148054:4997511	5.85795	4.97913	5.16028	3.60464	5.5892	4997511	483	ENSMUST00000148054	2317	cdna:known chromosome:GRCm38:4:137723989:137729861:1 gene:ENSMUSG00000041351 gene_biotype:protein_coding transcript_biotype:retained_intron	ensembl_cDNAncRNA	Rap1gap	chr4	137723989	137729861	+	TTCCACGGCTCTGGTGATACTGGGACCTGGGCCAGAGTCCCCAGGACCCCACTAGGAGACTCTGGCCCTGGCCTGGCCCCTGGAACCCTGACTGGGTCCTTGCTGGGATCTGGTACTCAAAGACTCTCTGCCCAGCTGCACGTCTCCCAATATTGCCGGTCCTGCATGAAGCATCATCTCTCCTTTTCCTCGTGACCCCTCCTTACCATGAGCTGCCTGCAGATTCTGTCCCTCCCTTCATGCCTCCTCAGGGCCCACTTCCCACCTCCCCACGCTTCTGATTCTGGGCATCCCGCCATGGTGTGTGGAAAGGGGAATGTCCCCACTCGGGGCACAGAGCCTCCCCAAGTAGAGTGAAGTCTGAGGGTGGAGGCGCCCTGGCAGGGGCTGGGTTTGCAC…
ENSMUST00000148481:4667665	2.68886	3.9767	3.80873	5.40575	2.79875	4667665	917	ENSMUST00000148481	2183	cdna:known chromosome:GRCm38:X:102407602:102505146:-1 gene:ENSMUSG00000067567 gene_biotype:protein_coding transcript_biotype:processed_transcript	ensembl_cDNAncRNA		chrX	102407602	102505146	-	GGCCTCTAGATGGTTAGCCCTGATCAGCCTTCAGCATATTCCACACTAGAGTTCACTTATCTCTTAAAATGAAATTTTAATTGTGCCCCCCCACACACACACAAACAGCAAACACATTGCACATGGACATGCCCACATATAATGTTTGAGATGTTTCACACACTTTACATAAAAACCCAAAGTCATTTATTTCTGTCTTTATACATGTCCTCTCGCTGCTTCTAGCCTGCATGTCACATGCACTTCCTTCTCCAAACGTCCTCTGCTCTTGTTAACTTCCATAAGCATCCCCGCCCCTAGCTCCCCTACCCTTACTGCACAAACCTTCAACTGTCTCTTTTTTCTGCTATGCTTTTTGTTTTGTTCTGTTTGAACATTTCTAGGGATTAAATTCAGGTC…
ENSMUST00000148593:5496380	1.84086	1.56824	1.41789	4.47924	3.35663	5496380	285	ENSMUST00000148593	493	cdna:known chromosome:GRCm38:11:94939012:94939741:1 gene:ENSMUSG00000001506 gene_biotype:protein_coding transcript_biotype:retained_intron	ensembl_cDNAncRNA	Col1a1	chr11	94939012	94939741	+	TTCCTGTCTAAGACCGCCAATTGCATTCCATTGTCTCATTCCTTTGGTTCCCACAAATGTAGACTGTTTCTGAGACTCTATGTCATCCTTGACTTGGGAAGGTTTTGAAGAGTCTGGCTGTTGGGCAGAGGGTGTTATTTTATAGGTTCTTCTGTAGTTTGGGATTGTCTGGTTAGATTAAATTCAGTCGAGGTGTCTGGTACAGGAATATCTTACAGGCTATATTGCTGTCTCCCTGAGTTAATTACTTCCGGAAGCCTACATCCGTTTGTCCCATTACTGCTA
ENSMUST00000148824:5296003	1.48083	2.23019	3.13413	3.6634	2.00885	5296003	91	ENSMUST00000148824	629	cdna:known chromosome:GRCm38:12:103434285:103436973:1 gene:ENSMUSG00000064215 gene_biotype:protein_coding transcript_biotype:retained_intron	ensembl_cDNAncRNA	Ifi27l1	chr12	103434285	103436973	+	GAGGAGGTAACTTAAGATCAGTAGAATGTTAGTGAATAGAACTTTATTGCATGCATTCACATCTTAATTGCTAGCCTATTACATTGGTTAG
ENSMUST00000148870:5514359	4.65625	3.39766	3.75891	2.44913	4.26252	5514359	263	ENSMUST00000148870	646	cdna:known chromosome:GRCm38:2:155572862:155576980:1 gene:ENSMUSG00000027605 gene_biotype:protein_coding transcript_biotype:retained_intron	ensembl_cDNAncRNA	Acss2	chr2	155572862	155576980	+	GAGAGGCTCTTAATCCAGCTGTCTAGTGGCTCCTTGGGGATGCTTACATAAACAGCCTTCGGTTTTGGTCCAGAGAACCCCTTTCAGAGACATCTTCAAATCTTCCACGGATGACATGGATCTTCCTGGGGAAGAAGGGTGAGAATGAGAGGTAGTAGATGTGAGTTCTGAATGGGCCTCTCTCCTGGGGCCACACCAGAGTCTCCTCCTTCCCTTACCTGTCTAGCAGCTCGTTCTCTACGGCACGCTGGTCAAATATGTTC
ENSMUST00000149165:4590194	6.78836	4.76478	4.02924	3.27456	5.31113	4590194	244	ENSMUST00000149165	4291	cdna:known chromosome:GRCm38:2:104207666:104257984:-1 gene:ENSMUSG00000068373 gene_biotype:protein_coding transcript_biotype:retained_intron	ensembl_cDNAncRNA		chr2	104207666	104257984	-	GTGTAACCTCCTCACGGTCCATGTGGGAAGAGGCTTTGAGTCCTGTATCTACCCAGCCATTCCGCACATCGGGGCCTGTCAGAGGGCGTGGTGCAGAGTCATTGCCCATTTATCTGCGCACATTGGCAGCAAGCTATGGGGCCTGGGCCCCACGATTCCAGACTGCAGAGTCAGTGATGACCAGCAGAGAGCTAGCCCCTGTTCCTCCTACAAATAGTTTTGCCAACTGGCCACATTTGTCAGA
ENSMUST00000149165:4932821	7.04321	5.73271	4.81969	3.93955	5.6974	4932821	156	ENSMUST00000149165	4291	cdna:known chromosome:GRCm38:2:104207666:104257984:-1 gene:ENSMUSG00000068373 gene_biotype:protein_coding transcript_biotype:retained_intron	ensembl_cDNAncRNA		chr2	104207666	104257984	-	CCAGAGATGCCCAGACTCTCATAGGTACCCCTCGCCTAGACTTTTCTACATCCTCCACAAAGCAGTACTCTGAGCCGTCCCTATCAGAGAGTCCCCGCCCAGCAGCTTCCCCAACTCCTGGGGTTCTGAGCTCCATAGCAGAACAAGACCACCTGT
ENSMUST00000149507:4368055	1.77577	2.39535	3.2668	5.44516	4.38502	4368055	96	ENSMUST00000149507	261	cdna:known chromosome:GRCm38:X:167317680:167330443:-1 gene:ENSMUSG00000044583 gene_biotype:protein_coding transcript_biotype:processed_transcript	ensembl_cDNAncRNA	Tlr7	chrX	167317680	167330443	-	GTGACAGACAAGTGGCCTCATACTGCAACCAATATGGACAGAGATGCATTCAGTGCTGTGATAAACTGACATCTGCTGGCATGATAGACAAAATAA
ENSMUST00000149758:4964027	2.46102	3.60097	3.35154	4.49183	2.57289	4964027	293	ENSMUST00000149758	1027	cdna:known chromosome:GRCm38:2:27268455:27277341:-1 gene:ENSMUSG00000009621 gene_biotype:protein_coding transcript_biotype:processed_transcript	ensembl_cDNAncRNA		chr2	27268455	27277341	-	TCCAGGGTTATCTACTCAGGCCACGTGAAGGGCCAAGATCTCCCTGTCCCCCTGGGTTGTTGCCCGATCCCTGAATGTGGGCCAGGCCCTCCACATCTATCAGTGGCCCTGACTCACACCCCTTCTCATTTCACGTAGCAGACGGGGTCTACACTTCTACCCTGACTCTTGGCACCTGTGCTAGGAGTTGACAGTAAGGAGAAGCAGTAAGGCAGGATCTGAGAACAGAGCCCTCCGTGGGTGCCCTGGGGCCTTGGCTATTCAAGGCAGCTCTCTGCCTACAGTGGGGATTT
ENSMUST00000149991:4311069	2.59913	2.97146	3.70143	4.66049	2.89595	4311069	70	ENSMUST00000149991	2616	cdna:known chromosome:GRCm38:11:69510666:69549110:-1 gene:ENSMUSG00000005237 gene_biotype:protein_coding transcript_biotype:processed_transcript	ensembl_cDNAncRNA		chr11	69510666	69549110	-	CTGGGTTCTGGACCAGACGAGCATATTTGCTCAAGTAGATGCCTTTGTGCAGCGCTGCAAAGACCTTATT
ENSMUST00000150114:4394640	1.25645	2.04731	2.42186	4.10649	1.67867	4394640	103	ENSMUST00000150114	499	cdna:putative chromosome:GRCm38:1:85597213:85598779:-1 gene:ENSMUSG00000070034 gene_biotype:protein_coding transcript_biotype:processed_transcript	ensembl_cDNAncRNA	Sp110	chr1	85597213	85598779	-	TTTTTTTGCTAAGTTGAAGAGATTGGGAAAGAAGAAGAAAGGGACGGACAAGTCTACTCAATGTGATGCTGGGATTAAATTCCTGGAAATACTCTTTGGAAAT
ENSMUST00000150178:4512387	1.69722	3.35537	3.94214	4.0634	1.53107	4512387	83	ENSMUST00000150178	455	cdna:known chromosome:GRCm38:2:88253569:88258673:-1 gene:ENSMUSG00000086378 gene_biotype:processed_transcript transcript_biotype:processed_transcript	ensembl_cDNAncRNA	Gm13753	chr2	88253569	88258673	-	TTTCACTGATTAATTGCTATTGTAGTTGGGAAAATTATAAAAGCATTTTAATTTTGATGTAAACTATACATGTGGTTTATTAA
ENSMUST00000150238:5468908	4.53571	4.68023	4.15689	2.32097	3.7176	5468908	278	ENSMUST00000150238	2552	cdna:known chromosome:GRCm38:5:5676095:5694533:-1 gene:ENSMUSG00000015653 gene_biotype:protein_coding transcript_biotype:retained_intron	ensembl_cDNAncRNA		chr5	5676095	5694533	-	CCTCTCCAGGATCTACACAGCTATACTGAAGAGCAATATCCACCGATAAAGAGACCCTGTCTCAAAAAAAACAGAAACACTTCCCCGCCCCCAAATATACCAAAGGGAAAATGCCACACTATCCTAACTCAGATTTTACAGTTCCTATGACGGTATCCCACTAGGGCAGGTAAATCCCGCGCATGCTCAGTACCTGCTGATAAGCCATGTTGAGGAACAGGTATCTTTCCGACCTCCTCATTGGTAAGCAGAGGCTGTAGGCTACGTGAACAACTGCA
ENSMUST00000150347:4950638	4.24238	3.45644	3.52743	2.10301	3.29433	4950638	117	ENSMUST00000150347	873	cdna:known chromosome:GRCm38:10:80138632:80142400:1 gene:ENSMUSG00000003072 gene_biotype:protein_coding transcript_biotype:processed_transcript	ensembl_cDNAncRNA	Atp5d	chr10	80138632	80142400	+	GCAGATAGCCAGTGCTGTAAAACACCTACTGGGAACTTGCCCTCAGAACTGTGATGGTCCCGCACACCTGCATTTGTAAGGTGAAATCAAGTGGATCAGGAGCGCAAGGTCAACCTC
ENSMUST00000150380:5203110	1.74672	3.16835	3.94081	3.93053	2.09722	5203110	167	ENSMUST00000150380	747	cdna:known chromosome:GRCm38:5:142486483:142487569:-1 gene:ENSMUSG00000029576 gene_biotype:protein_coding transcript_biotype:retained_intron	ensembl_cDNAncRNA	Radil	chr5	142486483	142487569	-	CTGGCCTGCTCACGATTGGGTAGCAGACCCTCCCTTGTGTCTTGATAGCAGGTCTCCTTCAGCCTCTCTGTCAGCCAATGCTGTGTCCAGAGCATGCTCCTTAGTGCCTTAGAGAGACAGTCCTGGTAGGTGGGTGCATGTGTGCCCTTACGTAGGAGCACGTGTCC
ENSMUST00000150868:5538330	2.54741	2.08544	2.70104	5.02356	2.66844	5538330	337	ENSMUST00000150868	624	cdna:known chromosome:GRCm38:3:54388889:54390393:1 gene:ENSMUSG00000027750 gene_biotype:protein_coding transcript_biotype:retained_intron	ensembl_cDNAncRNA	Postn	chr3	54388889	54390393	+	CACAGGTACACTTCTAAATTGCTCATGGTCTATAATGAAAATTTTACAGAGGCACATATATGCATATAATAACTGAAATATGGGTAGCTCTCTTGGAAGGTAGTGTCACATTTTACCAAAATGTCAGCGATAGGAAAACCAATTAAAGGATTCCAAGAGACACAATAAAACACGCTATGTTGGTGAACATTCACTATGATGCATGAGAAGCAGATGGCTTGGCAGGAAGTGAAAGTCTAAGGATCAGTAAGTTTACTACTCAAACAACTACACATTGAAGCAATGCCTACATATACTTTACACTTTTCTGCTTGGCAAGGGCCTCCGGATTTTACCA
ENSMUST00000150952:4349770	5.85314	4.11759	4.32024	3.15194	5.00906	4349770	150	ENSMUST00000150952	660	cdna:known chromosome:GRCm38:18:82563262:82584287:1 gene:ENSMUSG00000041607 gene_biotype:protein_coding transcript_biotype:processed_transcript	ensembl_cDNAncRNA	Mbp	chr18	82563262	82584287	+	CAAAGCGCAAAAGTTCCCGAGTGGGAACAGGTGCCAAGCTCAGGATGAGAAGCAAGAAATGCAGAGACAGGTCTCGTGTATCCCACGTGGGCAGCCCTCCTCCCCCTTCCTGCATCGTGGCTTGCTAGGCTCGAGCCTACCATGGACTGG
ENSMUST00000151207:4996570	1.86375	3.13461	3.01456	3.9155	1.9695	4996570	233	ENSMUST00000151207	430	ensembl_havana_lincrna:lincRNA chromosome:GRCm38:3:95016249:95020138:1 gene:ENSMUSG00000085956 gene_biotype:lincRNA transcript_biotype:processed_transcript	ensembl_ncRNA	4930481B07Rik	chr3	95016249	95020138	+	GAATGATGCGCTGACAGGTTCCACCCACATTCGTAATGGGAGAAGTGACCTTGTGGAGTAAAGAAAACAGAGCTCATCAAGAGTCTTGATGAGAACACACATGGTGCATTGATGGGGCAAAAGCTTTTATAGAACGAGTTCGTAAGATTGGAGAAGAGATGCCAGGTATGGTAGTGTAACCCTTTCACCTAGCATTTGTGAGGCAGAGCCACACTGATACATGGAGTGAGATC
ENSMUST00000151234:4360945	3.63157	6.66115	6.93446	6.31475	4.09064	4360945	141	ENSMUST00000151234	762	cdna:known chromosome:GRCm38:2:66540015:66543175:-1 gene:ENSMUSG00000075316 gene_biotype:protein_coding transcript_biotype:processed_transcript	ensembl_cDNAncRNA		chr2	66540015	66543175	-	GCTCTTTCTTGTGCATCAGTCATTGTCTCTGCTGGGGGGCCTGCTCTCTGGTCTGTGAATGGCTCTGCATTTCGTGATGCCTCCTCTGTGAAAACACGGGTTTAATTCATAGCTCAGCCCTCAAGTTAGGTGTCATAATCA
ENSMUST00000151536:5044784	5.16804	4.40961	2.92246	2.98183	3.97292	5044784	307	ENSMUST00000151536	732	cdna:known chromosome:GRCm38:2:32732620:32734878:-1 gene:ENSMUSG00000009551 gene_biotype:protein_coding transcript_biotype:processed_transcript	ensembl_cDNAncRNA	6330409D20Rik	chr2	32732620	32734878	-	CTTGCCAGTCATAGCTCAGTCATTCCAGTACACAACATGACTATGGCCACTGATAACCTATGGCCATTACTGGCCTGAAGATTACCACAGGCCACCCTTCCTCCATTTGTGGCCCTGAGACACACTCATCAACTCCTAGTAGCTCTGTTAAAATAAAAGCTGGAGTTCAGTTTCCCTTTGCCCTGTCTGGCAGCAGGGGCCCAGCTTCACCAGCCTGGGAGGCAAGGTTACTAACAGACTCCTGGGGATGGGCTCCTTATGGCCACGCCCACACACACTCACTACATGGAGCTACTCCGGCCAAGGC
ENSMUST00000152866:4632554	1.79583	1.96509	1.87441	4.48556	1.99272	4632554	71	ENSMUST00000152866	542	cdna:known chromosome:GRCm38:2:157121847:157130057:-1 gene:ENSMUSG00000027639 gene_biotype:protein_coding transcript_biotype:retained_intron	ensembl_cDNAncRNA		chr2	157121847	157130057	-	CATGGTTCACTACAGTAGGTTCTTAGTCCGTACAAGCTGAGCAAATTCTGATAGATTCAAACTGAAAGGCA
ENSMUST00000152898:4502279	2.44005	3.4582	3.35012	5.30111	2.17133	4502279	129	ENSMUST00000152898	839	cdna:known chromosome:GRCm38:2:69824354:69826244:1 gene:ENSMUSG00000042155 gene_biotype:protein_coding transcript_biotype:processed_transcript	ensembl_cDNAncRNA		chr2	69824354	69826244	+	CTGATCAGCGCTATGAGGCCTCTTACTAAGACTTTGGACGGCTAGTCCCTTCGGAATATAACGCTGATTCTCCCCAGAACTAGAGACATAATCTGCCTGTGCTTTGGTGATGCGGGCTTCTCTCAAAAT
ENSMUST00000152933:5284879	3.76723	6.00751	5.9051	6.0368	3.92994	5284879	76	ENSMUST00000152933	637	cdna:known chromosome:GRCm38:11:97436285:97444228:1 gene:ENSMUSG00000049807 gene_biotype:protein_coding transcript_biotype:processed_transcript	ensembl_cDNAncRNA	Arhgap23	chr11	97436285	97444228	+	GCGTGCCTTAGATTTCCAAGGGGTCTCACCCTGGCCCATGGCACCACTCCACATGTGGTAGTTGAATGGATAACCC
ENSMUST00000153025:5078817	4.3861	2.68214	2.76469	1.92518	2.79426	5078817	2307	ENSMUST00000153025	2864	cdna:known chromosome:GRCm38:5:35848776:35869192:1 gene:ENSMUSG00000029095 gene_biotype:protein_coding transcript_biotype:retained_intron	ensembl_cDNAncRNA		chr5	35848776	35869192	+	GTGGGGCACTAACCATCACTTGCTGCCTACCTGCACTCATCCCCATAGCTTTGTGACCTCATCGCAAGGAGAGGCAGGGATCCTGCTTGCCTGCTTGCCTCTGCCTGATGTTCTGCTAAAGACGCTGTGACTGTAGCCTTTTCCATGTCAAAAATTACCAGGCCACAACCAGCTATACTCTGACTCTTTTCTGCTGTGCCCCAGAAGCCAAAGAGTCCCCAGTGTGTAAGGCAGGGGAGCTGTAGGTCACCCAGAATGACTAGGGCTGCTTTGAGATGCTCTTCAGCCCCATACCCTTCCCCATGGCTAATGTGTTCCTGTGTCTATGGAGCCGTGCTCATCCCATGTACTAGCATGTGGTCTGTGGTCACTGGGCATGGGCTCTTATCCTCTTCCCAA…
ENSMUST00000153033:5466582	2.66098	4.58765	4.64517	4.90082	4.29743	5466582	210	ENSMUST00000153033	1296	cdna:putative chromosome:GRCm38:2:144254794:144260762:-1 gene:ENSMUSG00000027423 gene_biotype:protein_coding transcript_biotype:processed_transcript	ensembl_cDNAncRNA	Snx5	chr2	144254794	144260762	-	GTCCTGGTACTAGTAAGATCAAGCAAAGCAGTAGCTCTTCAGAGAAAAACCTCTGGGACGGTGCCACCATGATTGAGTGTTGGCCTAGCCATTGGAAATATCTGTATTTAGCTACTTAATTTTTGACTCCTGGTTTAAGGTTGGGTTAAAGTACCTCGTGTATTCATGATAGTAAAAATGTTACTTGTGTGATTACTCAACTAAAGATGC
ENSMUST00000153095:4393093	4.86189	2.48645	3.03425	2.48059	3.70937	4393093	174	ENSMUST00000153095	406	cdna:putative chromosome:GRCm38:8:12912526:12915758:-1 gene:ENSMUSG00000086770 gene_biotype:antisense transcript_biotype:antisense	ensembl_cDNAncRNA	Gm15351	chr8	12912526	12915758	-	CACCTGGAGTCATGCGTGTGCACCACCTGAGCACCTGGGAGGCTAGTTTGCATCAAGGGGGCATCAGAAAGCCCACTACGCAGGCGCACAGGTCTGCCCTTGCCCTTCCCCCTCTTCCTAGGGTTTCTGTCCTCCGGGATTGGAAGTAGCTGCTGCAGGGACGCGATCCCAAAC
ENSMUST00000153236:4797457	2.6902	3.19836	3.16862	4.7166	4.55455	4797457	144	ENSMUST00000153236	847	cdna:known chromosome:GRCm38:11:75468711:75470203:1 gene:ENSMUSG00000038217 gene_biotype:protein_coding transcript_biotype:retained_intron	ensembl_cDNAncRNA		chr11	75468711	75470203	+	GTAGCCCACTGCATAGTCTACTATGTAGCAAGGACTAGACTGTATCATCAGAGAGAGAGAGAGAGAGAGAGAGAGAGAGAGAGAGAGAGAGAGAGAGAGAACATTGTATGAGATCTCCATTACAGTCAGGAAATCAGGAGATCT
ENSMUST00000153404:4376920	2.50037	2.97625	3.70304	5.30691	5.19445	4376920	118	ENSMUST00000153404	651	cdna:known chromosome:GRCm38:9:75193773:75203752:1 gene:ENSMUSG00000034593 gene_biotype:protein_coding transcript_biotype:retained_intron	ensembl_cDNAncRNA		chr9	75193773	75203752	+	TCATGACATTATTAGGGTCAGGAGATGCACAGATGGTATAGAGTATCTGCTTTTCCTGTTTCTTTCAAAGGAGTGTGTAGCTTTGTACCCATTAGTGTGAACTCAACTACTCTACAAA
ENSMUST00000153526:4956201	5.92818	3.83232	4.89108	3.73973	4.82305	4956201	56	ENSMUST00000153526	2946	cdna:known chromosome:GRCm38:11:100704746:100712173:-1 gene:ENSMUSG00000020918 gene_biotype:protein_coding transcript_biotype:processed_transcript	ensembl_cDNAncRNA		chr11	100704746	100712173	-	CCTCCATGGGCCTTCTGGGATCTGGGTGTCTACCTGGCAGATTTGCCCATGGCCCA
ENSMUST00000153636:4649486	4.42697	2.2117	3.35736	2.22699	4.16956	4649486	153	ENSMUST00000153636	485	cdna:known chromosome:GRCm38:1:74661817:74673255:1 gene:ENSMUSG00000033257 gene_biotype:protein_coding transcript_biotype:retained_intron	ensembl_cDNAncRNA	Ttll4	chr1	74661817	74673255	+	AGCAGGCGTCTTGAAGTAAATTATCACACAATGTCCCCCTTATCTTCCCCTGCTCAGTCCTTCATCCCATCCCTCTGCACAGGATGACTTGCCACTGGCAATGGAGGGTATGCTATGGATTTACACAAGTAGATTTAGATGCCCTGAGTGTCC
ENSMUST00000154145:5166972	2.79402	4.45307	4.05523	5.50728	3.43527	5166972	470	ENSMUST00000154145	3981	cdna:known chromosome:GRCm38:3:103733700:103737968:-1 gene:ENSMUSG00000027848 gene_biotype:protein_coding transcript_biotype:retained_intron	ensembl_cDNAncRNA		chr3	103733700	103737968	-	GATCGGGTTGTGTAAGAAGTCCTTAATGACGAGTAGCCTCTTAACTACAGACTTTTATTTCCCCAACATAAGACAATTGCCCAGCAAATAAACGCAACACGGCTCCCTCAGATTAGATGGAATAAGGGGGCAGGGGAAATGAGAGTCAGAATCGGGCTGCATCTATGCTGCTATACTGTTCAAGTTTCCCAGGCAATCTGCCTGCAACTTCCTGTCCGTTTCTTCCCCGCACCCCACATCTACTCCCTTTTGGACAATTTGAAGTCTGTAGCATCCTAATTTCCTGGAGGCTCAGATCACTGAGAACGCAAGGTGAAGGACTCTTATTCAGGCAAATTAAGCCAGGTTCCTCGGATGGGATGGTACCACTGACTAGTCTCCTCTGCTGTGGGAGCATGG…
ENSMUST00000154262:5374179	4.29009	2.49883	2.50976	2.11261	4.36871	5374179	278	ENSMUST00000154262	1323	cdna:known chromosome:GRCm38:8:109868542:109904971:1 gene:ENSMUSG00000031732 gene_biotype:protein_coding transcript_biotype:retained_intron	ensembl_cDNAncRNA	Phlpp2	chr8	109868542	109904971	+	AGCATGCTTGTACTCTGAGTGCCGAGGAAGCAGTGACAGGCAGGTCCCTGGGCTTGTCGCCCTGCCATCCTAGCCTTATTATCAAGCTTCAGGGGAACCAGAGTCTCTGGTTCAACAAACAAGGTGTACTGCTCCTGAGGAATGGCTTCCCAGGGGTTTCCCTGGCCTCCACATGTACACACACACACACACACACACACACACACACTCACACACTCTCGCACACAGGCTGACTGTGTGCTAGGCTGTAGCTCAGTTAGCATGTTTGAGTCCCTGGA
ENSMUST00000154476:4595924	2.72062	4.39616	5.08224	4.97611	3.85924	4595924	135	ENSMUST00000154476	625	cdna:known chromosome:GRCm38:9:66526661:66530402:-1 gene:ENSMUSG00000032376 gene_biotype:protein_coding transcript_biotype:retained_intron	ensembl_cDNAncRNA		chr9	66526661	66530402	-	GTGCATTTAAAGTTGAGTGTTCCCGTTAGAGCTCACAGTCTGTTCAGTGTTTGATCTGTGTGTGGTTCACAGCTGTGCTGTTCTTACCCCCCAGATCCTATTTCACAATGTATCGCAATGAAGGGTAAAGTACTT
ENSMUST00000154490:4566496	2.46078	3.87058	4.3521	4.68391	2.61069	4566496	88	ENSMUST00000154490	860	cdna:known chromosome:GRCm38:2:29935428:29938955:1 gene:ENSMUSG00000019715 gene_biotype:protein_coding transcript_biotype:retained_intron	ensembl_cDNAncRNA		chr2	29935428	29938955	+	GACGGGGCTTGACACTACAGAGCCACTTTGTGGGAGATTCTCTGGGGAGGATACTAACTGTATGCTAATCATGATTTGCCACCCACTG
ENSMUST00000154612:4359984	4.76062	3.45212	3.27738	2.66118	3.96108	4359984	114	ENSMUST00000154612	392	cdna:known chromosome:GRCm38:2:57267377:57268108:1 gene:ENSMUSG00000026827 gene_biotype:protein_coding transcript_biotype:processed_transcript	ensembl_cDNAncRNA	Gpd2	chr2	57267377	57268108	+	CGAAGGAAATCTTAGTGTCTCAGCGTTCGGCTTCTGTGAGAGTTACATCAAGAAGGGAGAACTTCAGAAAGTTGTCCCCGAGTTTGAATTGAACCTAAGGCCCAAGGACCTGAA
ENSMUST00000154771:4322177	5.02866	3.68272	3.40423	2.83622	4.43911	4322177	73	ENSMUST00000154771	774	cdna:known chromosome:GRCm38:X:100605555:100613841:1 gene:ENSMUSG00000060890 gene_biotype:protein_coding transcript_biotype:retained_intron	ensembl_cDNAncRNA		chrX	100605555	100613841	+	TGGGAAAGAGCCTGAGAAGGGAGTGGGAGCCAGGAAGAAAAGGAAAGGCCAGGCATGACCATGCAGAGCTATG
ENSMUST00000154953:5360880	4.8832	3.61859	2.74074	2.8126	3.12617	5360880	382	ENSMUST00000154953	713	cdna:known chromosome:GRCm38:6:83166152:83172733:-1 gene:ENSMUSG00000085782 gene_biotype:antisense transcript_biotype:antisense	ensembl_cDNAncRNA	Gm15624	chr6	83166152	83172733	-	AGGACGCCAATTTCTGACACAGTTCTTCCATTCTCAGTACCTTTTAAGTACACCAGGGTAACAAGGGGCCAGCAGCCGCTTGCAGCTCTCTGCGCTGCTGTAAATGGATTTCAGTCTAAAGACCTGCCTCTTTGAAAACAGCAATTTCGCATCTGTGTGCTTTAGCTGTCGTCCTGCTCAGTTACGAGAGGTGTGTGTACAAGACGACTACACAAGGATCGTTTTGTAAGCCTAGTTGGACCCCAGGACAAGGCGTACTCACACATCAAACGCATTTCCAGACCCTCCACGTCTGAACCCTCTAGGATTAATTTTTGTCTTCGTTTAACACAAATTCCTAAACACGTGCCCACAGAAAGCCTGCGCTCACTACGGTGTCACA
ENSMUST00000154999:4310416	6.36319	8.3362	9.86914	11.1117	9.13982	4310416	53	ENSMUST00000154999	588	cdna:known chromosome:GRCm38:4:86648386:86658683:-1 gene:ENSMUSG00000028494 gene_biotype:protein_coding transcript_biotype:processed_transcript	ensembl_cDNAncRNA		chr4	86648386	86658683	-	TTCCCTGCTGCTGACTCGACATCTGACACTGACGAAGTTCCTGATATTATTCC
ENSMUST00000155361:4762731	5.84754	5.76886	4.64364	3.44945	5.00964	4762731	267	ENSMUST00000155361	1796	cdna:known chromosome:GRCm38:4:87175785:87230467:-1 gene:ENSMUSG00000037996 gene_biotype:protein_coding transcript_biotype:processed_transcript	ensembl_cDNAncRNA		chr4	87175785	87230467	-	CTGCCAGCTCTGGTGGAATTGTATGGATAGGCGTTCTCAGTTGTTTAACAACCAGTTATTTCTAGCATTTCTGCAAGGAGTGGTCTCAGGCTACTGTGCCAATCCAAGCTATACTTAATTGGAGTGTGTAGAAATTATTCTTATGACCTCTGCCTTAGATGATGACAAGCCAGTCTTAACCACTTGGATTGTTTGGGGAGCAGATATATTTGGGAGCTCACCAGGGTCGGGGTCTGGGTTGGGTGTAATAAGCTGTCTGAACCTGTC
ENSMUST00000155361:5339629	5.78096	5.27673	4.95201	3.48206	4.60589	5339629	311	ENSMUST00000155361	1796	cdna:known chromosome:GRCm38:4:87175785:87230467:-1 gene:ENSMUSG00000037996 gene_biotype:protein_coding transcript_biotype:processed_transcript	ensembl_cDNAncRNA		chr4	87175785	87230467	-	CATGGGTCCTGCATAACGAATGTGAATGGAGAGCCGCTGAAAGAAAAGACCCAGAACAGCTGTATGGAAGAGGTATCCCTCAAGTTGGCATTAGGATTATACCTTAATACATACCTCACACGATTGAAGCCTTATTAGAGCTGCCAGCTCTGGTGGAATTGTATGGATAGGCGTTCTCAGTTGTTTAACAACCAGTTATTTCTAGCATTTCTGCAAGGAGTGGTCTCAGGCTACTGTGCCAATCCAAGCTATACTTAATTGGAGTGTGTAGAAATTATTCTTATGACCTCTGCCTTAGATGATGACAAGCC
ENSMUST00000155544:4487456	6.01267	4.4718	4.8313	3.89411	4.8313	4487456	133	ENSMUST00000155544	4169	cdna:known chromosome:GRCm38:12:108471853:108539564:1 gene:ENSMUSG00000058070 gene_biotype:protein_coding transcript_biotype:processed_transcript	ensembl_cDNAncRNA		chr12	108471853	108539564	+	CGGACCGACGGTCTGACCTGTCTGAAAACCAAATGGAAATGAACTGTGGGGGAGGGCTGCCTGCATATGACCCTGTTAAGCTGAAACCTCTGGGGTTCCCCACCACCCTGGGGAAACCTCAACCCAGATATGA
ENSMUST00000155605:4548463	2.53333	4.20132	5.39794	5.67442	5.12077	4548463	65	ENSMUST00000155605	926	cdna:known chromosome:GRCm38:2:13574322:13578604:1 gene:ENSMUSG00000026728 gene_biotype:protein_coding transcript_biotype:retained_intron	ensembl_cDNAncRNA		chr2	13574322	13578604	+	TAAGTGACACCAATTTCTGTGGGTGAACAAAGCTGCGACCGTGTAGTCTACGACCTCTCTGTGTC
ENSMUST00000155687:5493896	2.88296	2.34815	2.32311	7.25835	6.59558	5493896	150	ENSMUST00000155687	1033	cdna:known chromosome:GRCm38:6:4530156:4535057:1 gene:ENSMUSG00000029661 gene_biotype:protein_coding transcript_biotype:retained_intron	ensembl_cDNAncRNA	Col1a2	chr6	4530156	4535057	+	GACGCCATTCTGATTCTCATTACCATAATAAAAGATTTTAAAAGCTGCCACTTCAAATGTGACAGATTGATCGCTGAATAACTCCACTTAAGATTTTCTACTCATGGCATTTTCTTTATACAGATTGCATGTCACCTATCCAGGAAGCTT
ENSMUST00000155823:5091107	4.03028	2.97155	2.64778	1.80831	2.90013	5091107	386	ENSMUST00000155823	3061	cdna:known chromosome:GRCm38:17:69969368:70081019:1 gene:ENSMUSG00000003279 gene_biotype:protein_coding transcript_biotype:retained_intron	ensembl_cDNAncRNA	Dlgap1	chr17	69969368	70081019	+	AATCTGGCTGGGTATTCTAACTTTAATGCCAGCACCCCTTTTGTTTAGGATTCGCCACCACAGATGTGTTCTAGGAAGCTAAGAACCTTCAGTCCACGTTTCATGCTAAGGTCTGACATACATCATACAAAACTGAGTAAAGGAATTTGGGGAAGCAATAAAATCACATTTTAGATGTTTCTTTTTCCTTCCATTTGATGTTGTATATTTGTTTCCAGTACAATTTTAAGTAAATTAGTTACAGGAACAAGTGGTGGTAGGAATGATATACTATATCTCCCAAGATGTATCTTGACATTTGTGGCTAATCATTAAATATAGTAATCTTCAGTAGTGTTAACTCACTTGTTTATGTGATCTGGGCCTATGCCAGATTATTTGTGACA
ENSMUST00000155925:5068357	5.97808	5.25119	4.58052	3.95431	5.44508	5068357	61	ENSMUST00000155925	354	cdna:known chromosome:GRCm38:7:51926436:51943767:1 gene:ENSMUSG00000030498 gene_biotype:protein_coding transcript_biotype:processed_transcript	ensembl_cDNAncRNA	Gas2	chr7	51926436	51943767	+	CCTGGAGCGCAATGACTATCCATCTGTTTCTCAGAGAACGAATCTGCCCACCAAGAAACGG
ENSMUST00000156107:4312296	3.54998	3.43992	4.81484	6.59866	7.44762	4312296	72	ENSMUST00000156107	2145	cdna:known chromosome:GRCm38:X:84772711:84975707:1 gene:ENSMUSG00000045103 gene_biotype:protein_coding transcript_biotype:retained_intron	ensembl_cDNAncRNA		chrX	84772711	84975707	+	GTTTGCTATGCAACAGGATCAGTGCTGTAGTCCCCGGTTCAAGCTGAAAATGTTGCACAGGAAGACATATCA
ENSMUST00000156354:5414226	1.90445	4.16679	3.71186	4.04916	1.52426	5414226	131	ENSMUST00000156354	576	cdna:known chromosome:GRCm38:3:69018915:69021400:1 gene:ENSMUSG00000034349 gene_biotype:protein_coding transcript_biotype:retained_intron	ensembl_cDNAncRNA	Smc4	chr3	69018915	69021400	+	TCTTCCAAATCTAGTTGTGTAAATTTTTCTTTATTCTGTTCGATAAATTTTGTAACTTTATTGAGCTTCCTATCAAAGAGAGTAAATTGTCAGAGATATAATCTTTCTGATATATCTCATCTACAAACATG
ENSMUST00000156407:4916915	3.12545	5.29526	5.59631	5.38339	3.07175	4916915	144	ENSMUST00000156407	817	cdna:known chromosome:GRCm38:14:31084204:31088040:1 gene:ENSMUSG00000042323 gene_biotype:protein_coding transcript_biotype:retained_intron	ensembl_cDNAncRNA		chr14	31084204	31088040	+	TTTGAGACTTAGTATTCCACATGCATAGAATGAAGACAGAATTCCCTTCCCTGGCAATTTCTCAAGCTTCCTCACACCACATTTTCCCTGTTCCTACTTCTGTGGCAAGTAGATGGGCGCACACGTGTGTATAATCCCAGCAAT
ENSMUST00000159385:4542101	4.77223	2.13589	3.598	2.45483	3.13556	4542101	425	ENSMUST00000159385	2801	cdna:known chromosome:GRCm38:9:44273188:44278614:-1 gene:ENSMUSG00000032131 gene_biotype:protein_coding transcript_biotype:retained_intron	ensembl_cDNAncRNA		chr9	44273188	44278614	-	GGCAGCCAGGGTCTACTTAGTGTCAGATCCCTTCTTAGATGGGATGCCATCACTCCTGAAAGCCAGGGGCTTAGCTGTTGTCATTATCAGTCACTGTCATCTTTGCTAATCAATGGGTAATCCAGTGTGGCCCATTCAAACAATTATAGCCTTAGAGTTAGTGGTAATGAAGTGAAGAAGGTGCCAGTCAGATGAGCCAGAAGGGGTCCTTGACTCCTTCCTGTCTCCTGTCGCCCAAGTGTCTTTATGTGCTCTCTCTGCACCCTCAAGTTCCCTGAGGTTCTCACCCCTAAATTCAGAGCAGCTCAGGGGCAAAGGCTCCTCCTTCTGCAGGCCTGGCACTGTCCTGGGAAGAGCTTGGGACTCTCCCATCTACTGAGCTGGATGGGCAGTGCGTGG…
ENSMUST00000159465:4907334	2.08145	3.20427	4.1499	4.33457	3.68227	4907334	96	ENSMUST00000159465	472	cdna:known chromosome:GRCm38:7:111074138:111074699:-1 gene:ENSMUSG00000005610 gene_biotype:protein_coding transcript_biotype:retained_intron	ensembl_cDNAncRNA		chr7	111074138	111074699	-	TGACTTAACACTAAATGGATATTTGGGTCCTTGAGTGGAATTTTGTTTACTAGGAAATCATTTGTAAAGCTTTGTTTAGGTAAGGTCAACCTGATA
ENSMUST00000159935:5338869	3.55687	4.61902	3.67733	5.73863	4.73064	5338869	1146	ENSMUST00000159935	3474	cdna:known chromosome:GRCm38:8:83666833:83671268:1 gene:ENSMUSG00000019464 gene_biotype:protein_coding transcript_biotype:retained_intron	ensembl_cDNAncRNA		chr8	83666833	83671268	+	TCGCGTGACCATCGTTAGAACTGTACTCGTCCCCAGTGGAGCCTCTTTCACCCCTGTGCGGTGACAGTGTTGTGGACCCACAGGACGCAGCGCCCTAGGCACACTGAGTTTGAGACTCTATACCCTTGAGCCCAGCCCAGAATGGTTTGACTTAGCTTCTGGGCACATTCAGAGGTGACTGAAACCACTGTGCCGGGAACTACGCAGTGAACTGGCTTCCCAGGCACTCTTGGTTAGGCCCAGCTCCGTTGGACCACCCTTGGCACTGACCCTCAGGGGTAGGAGGCGAAGCAGTTGGCGCAGCATGGCCTGGCGCAGCAGGATGTACACCCATGGGTCCAGGATCTGGTTCCACGATGCGAGGCGTACAGCCAGAAAGAGTGGCCGCTGCAGGGAGTT…
ENSMUST00000160737:5556439	7.22024	6.64306	6.62343	4.87182	6.56243	5556439	108	ENSMUST00000160737	2338	cdna:known chromosome:GRCm38:3:88021750:88027583:-1 gene:ENSMUSG00000004894 gene_biotype:protein_coding transcript_biotype:retained_intron	ensembl_cDNAncRNA		chr3	88021750	88027583	-	TAAAAAGGGCAGCTGTTGAAAGTCCCTAGGGAGTGAGAATCAGTGGGGAGAGGTAAGGCTGAGCCCGAGGAGAGCCTCTGGGGACTAGGTCTGAATGGGCACTTGGGG
ENSMUST00000160970:4635881	2.76079	4.56751	3.27623	5.19345	2.26183	4635881	84	ENSMUST00000160970	647	cdna:known chromosome:GRCm38:19:47794851:47812146:-1 gene:ENSMUSG00000044948 gene_biotype:protein_coding transcript_biotype:processed_transcript	ensembl_cDNAncRNA		chr19	47794851	47812146	-	GCCGCACCGGAGAATGCTCAACATTCGCGTTAGAGAGGAGTCTCGTCCTTCTTCTAGATGGTGGTGGCACAATATTCCATTATA
ENSMUST00000161704:4808001	4.33268	4.25999	4.87034	1.91217	3.81669	4808001	432	ENSMUST00000161704	849	cdna:known chromosome:GRCm38:1:135406017:135407140:-1 gene:ENSMUSG00000041879 gene_biotype:protein_coding transcript_biotype:retained_intron	ensembl_cDNAncRNA		chr1	135406017	135407140	-	TCAGTGTACTAGATGCAAGCCATTGAGAACTCATCATCTTCCGTGTCATCCTTAGGACATTTTCAAAGCCAGCTGAAAACTGTAGCATTTGAGTGTCACAGATGTCTGATACAGCTAGCTACCCTCGTCATTTGTCTCATTTAATTTCGAAGTCCCACATGATGGTAGCCTTCATTTCTGTCAATATTTTTAAGTACTTCAGATGAGAAATAGACATGCTGGGAAATGTGTTCAGTGTCTGTGACTCTTTTACTCCTAAAGTATTTAATATCCTCAGACTTCCTTTCTTTGACTCTTCAGCCTCTTCTACCAGCTCTTCAGGAAAAATTAGCAAGTACTTTACATGTTCATTAATTTACAAAGCTAATGTAGTTTGTTTTCGGATGAGCGCTTTCCTTT…
ENSMUST00000161765:5226830	4.39206	2.63806	2.13669	2.2883	2.66657	5226830	200	ENSMUST00000161765	4288	cdna:known chromosome:GRCm38:10:79736123:79746573:-1 gene:ENSMUSG00000020329 gene_biotype:protein_coding transcript_biotype:retained_intron	ensembl_cDNAncRNA		chr10	79736123	79746573	-	ACGCAAGTGGACTGCCCATGGCTGAGCCCGAGGTGCCTTAGGAACTGGCATTTGCAGTTGGGTCTTACCGTAAACTGGGATTGCCCTGTGGGACTAGTCTCTTGATTTATGAGGGAGGTTGCTCCCGGGTCTCCTTGCACCAGGTGGTGGAATAAGTTTCTGGGGTGACCTGTGTGTCCCTATTGGGTCATTTGGCCTCA
ENSMUST00000161798:4383899	2.46533	4.26228	4.80811	4.55413	3.56153	4383899	79	ENSMUST00000161798	490	cdna:known chromosome:GRCm38:10:109880633:109904023:-1 gene:ENSMUSG00000020181 gene_biotype:protein_coding transcript_biotype:retained_intron	ensembl_cDNAncRNA		chr10	109880633	109904023	-	TGACTTCTTTAGCTGGAATGCGATCCAGAACAGTTTCCCTTTGAGCCTCACATTTGCCTCGCGGGGTTTTCTTGTCTCT
ENSMUST00000161990:4648109	2.35102	3.13202	4.01984	4.94831	3.7044	4648109	72	ENSMUST00000161990	430	cdna:pseudogene chromosome:GRCm38:3:144847574:144848003:1 gene:ENSMUSG00000089950 gene_biotype:pseudogene transcript_biotype:processed_pseudogene	ensembl_cDNAncRNA	Gm16215	chr3	144847574	144848003	+	GCCAGCTTCCTACTTGCCATTCATTGGCACTCCAAGCTGCAGCAAGAGTTCGACAGTTGTTGCATGTCCAGA
ENSMUST00000162716:4676999	4.14764	2.76949	3.36089	2.01302	2.89344	4676999	75	ENSMUST00000162716	539	cdna:known chromosome:GRCm38:13:95104688:95186317:-1 gene:ENSMUSG00000021684 gene_biotype:protein_coding transcript_biotype:processed_transcript	ensembl_cDNAncRNA	Pde8b	chr13	95104688	95186317	-	ACCAGAGAGCTTGCTGAAAGGGTCTGGTGTAGGAAGCAAATGCTTAGGTTTGGATGCATCCAAGCGTTGCCTGTG
ENSMUST00000162949:4346887	2.75985	4.09469	3.17357	5.02995	4.14295	4346887	203	ENSMUST00000162949	343	cdna:known chromosome:GRCm38:1:163989738:163994541:-1 gene:ENSMUSG00000041406 gene_biotype:protein_coding transcript_biotype:processed_transcript	ensembl_cDNAncRNA	BC055324	chr1	163989738	163994541	-	GCGCGCCTAGCATTGTCGGACGATTGCGACTGGAGCGTTTGAAAATGATGAGTGCTCTCATGCCTTAAGTTTAGTTCTCTGTTCCTAAGTTTGCCCGGTCGGTCGCACTTGCCTAAGTGTGGGAGATGCCCGCGCTGGTGCTCAGTATCTGGATGAAGCGTGAGAGCTGAAGGATGTAGTTGTAGTTCTTCCGTGGTACCACA
ENSMUST00000166302:4829950	4.54926	2.0723	2.666	2.38584	4.23284	4829950	376	ENSMUST00000166302	640	cdna:known chromosome:GRCm38:15:81802707:81806049:1 gene:ENSMUSG00000022389 gene_biotype:protein_coding transcript_biotype:processed_transcript	ensembl_cDNAncRNA	Tef	chr15	81802707	81806049	+	CAGGATCCTGACATGCTCTAGAGTCAAACTTGGCAAGAAGGGGCACTTCTGGACAAGGCCATAAGAAGCAAAGCCTTAACATCAGGGTCAGGAGGTGATCTTTGATTCTGCCGCCCAATGAGCAGTCTAGTCTTTTTAAGGAGGATGAGGAATGCCTATGCGGCTGGCTCCTTGCCAGGACTAAATGAGCTGTCCCACATGAAATGTTTTCAACCGTGACATATCATGCGGCTCTCTGTCAAAGGCCAAGAACAGCATGGCTTGGTTTCCGCTCTTTCTACCTATAATCTGACCCTTGTTTCCTTCCTGCTTACATTGGCAACTTGACTCTCATTTCCTTATGTTTAAGAACTGGCTGTTATGAGACTGTTTCCTT
ENSMUST00000166800:4898166	4.22298	3.88176	3.06872	2.14664	3.90784	4898166	167	ENSMUST00000166800	5163	cdna:known chromosome:GRCm38:9:123593820:123632399:-1 gene:ENSMUSG00000025243 gene_biotype:protein_coding transcript_biotype:retained_intron	ensembl_cDNAncRNA		chr9	123593820	123632399	-	ATGACCTTCCAGTACCAGCTGAGGGTGCGGCCAGTCATGGCCCGAAGGTCACTTTCAAATCTGTTTGGACCACAGGGGGAGAGCCTGGAGGGAGGGGCTCCGGATCCATACCCTCTGCACTTAGGAAGATGCTATTCTGGTTACCAGTGATCTTTGAGTGTGACCCT
ENSMUST00000167812:4443907	1.67352	2.55018	3.03924	6.56441	4.14139	4443907	501	ENSMUST00000167812	2803	cdna:known chromosome:GRCm38:1:144244673:144249027:-1 gene:ENSMUSG00000026358 gene_biotype:protein_coding transcript_biotype:retained_intron	ensembl_cDNAncRNA	Rgs1	chr1	144244673	144249027	-	ATCCGTGGTATCATAGTTTTGCATATAGACAAATATATTCATTTATCCATTCACTTCAGTGGAGCCATTCCCTGGATTTGTAAAGCTATCTAGTAGAGAGACTAAAATGATTTTACAAAACTGTCCAACCTAGTAGGATGGAGAATGGAATGTGGTATTGCAGGGCAGATTGTATGTTAAGGAACCCTTAGTGAGCTATTGTAACTCAGATAAGGATAAAATGCAGACCCCAATAACACACACAATCAAAGTAACAAAAACATGTACAGCTACTTACAGTGTTGATCTTCCAGGACAATATTCCCATTCAGTAAACCTAAAATGCCTATGACCTTCTATTGTGATATATGGACTATGTTCTGGGGATATTTAATTTTTCATACCTATTTATTTTCTTTC…
ENSMUST00000169740:5325055	3.87726	3.47035	4.8049	5.95194	4.50696	5325055	245	ENSMUST00000169740	1681	cdna:known chromosome:GRCm38:7:110339184:110352241:-1 gene:ENSMUSG00000038371 gene_biotype:protein_coding transcript_biotype:retained_intron	ensembl_cDNAncRNA	Sbf2	chr7	110339184	110352241	-	AGCCACACGTGATGGTGCCGCCACACCTGTAATCTCAGGACTTGGGAGGATTAGGAGTTCAAAGCCAGCCTCCACTTATGAACTAGAGAGACAGCTCAGTCAGTAAAGCAGTTCTACCCAAGCCTGAGGACGGAGTTCAGTCCCCAGTGCCCATGGTCAGAACTGGACGGCCACACATTCCTACCGTCTTAGCACTGCAGAGGTAAAACAAGAAAATCCCCAGGGCCAACAAGGTTCAGGTTCCA
ENSMUST00000170252:4807209	2.48273	3.36333	4.59742	5.24219	4.96918	4807209	76	ENSMUST00000170252	420	cdna:known chromosome:GRCm38:6:65131980:65138271:-1 gene:ENSMUSG00000029919 gene_biotype:protein_coding transcript_biotype:retained_intron	ensembl_cDNAncRNA		chr6	65131980	65138271	-	GAACTTGCTATCGTCCCTGCGGTTAACCTTCTAGTGCCTCCAGAAATCGCGTTCTCGGGCTCTAAAGGCCATTTTC
ENSMUST00000170597:5616639	1.65511	2.91271	3.68798	4.52171	2.06424	5616639	157	ENSMUST00000170597	889	cdna:pseudogene chromosome:GRCm38:9:107292435:107293323:-1 gene:ENSMUSG00000091366 gene_biotype:pseudogene transcript_biotype:transcribed_processed_pseudogene	ensembl_cDNAncRNA		chr9	107292435	107293323	-	GAGCGCCTGTGGAATTTACACCAGATCACCACTTCTACAGAGACCCAGAGGAGGTTGAGAAAGAGGACCAGGCAGCTGCCAAGAAAGCTGTGATCAAGGAGGAATTCCAGAGTGAATGGACTGCCCCAGCTCCTGAGTTTATTGCTGTTCAGCCTGA
ENSMUST00000172703:5163812	4.27423	3.07047	2.50064	2.21083	3.07517	5163812	116	ENSMUST00000172703	624	havana:non_coding chromosome:GRCm38:3:34638504:34682619:1 gene:ENSMUSG00000090828 gene_biotype:non_coding transcript_biotype:non_coding	ensembl_ncRNA	Sox2ot	chr3	34638504	34682619	+	GACCTAGAACTTCCTGTCTATCAACAACTCACTACTTAGCCAAACTTAACCCAGAGCTTCTTTCTGATCCTTATGTCTCTGCTTCACATTCTTCTGGCTTAATTCTGGGCTGGATA
ENSMUST00000172718:4639169	4.4162	2.78891	3.83802	2.31784	4.36009	4639169	97	ENSMUST00000172718	392	cdna:putative chromosome:GRCm38:18:75374914:75394001:1 gene:ENSMUSG00000025880 gene_biotype:protein_coding transcript_biotype:processed_transcript	ensembl_cDNAncRNA	Smad7	chr18	75374914	75394001	+	TTTGCTTTTCCGGAGCCAAACTGTCTATGGGGACTTAGGAAGACGTTTGACATTGGCAGTGGTGCAGAAGAAACTTACAGGGGCCTCTGCGTTTGCG
ENSMUST00000174136:5087029	6.30873	4.87856	5.51476	3.24948	5.84519	5087029	143	ENSMUST00000174136	802	havana:non_coding chromosome:GRCm38:3:34638174:34675897:1 gene:ENSMUSG00000090828 gene_biotype:non_coding transcript_biotype:non_coding	ensembl_ncRNA	Sox2ot	chr3	34638174	34675897	+	CTCTGGGTGCATTCTTCCCGCTCCCCCTCTCTCTCCCCCTCACCCTCTCTCTCTCCTCTCTCTCTCTCCCTCTCCCTCTCTCTCTCTCTTTTAAAAAATCAGCCATTTGGGGTTTTAAGCCATAAACGATTTTTCTTGTTGCA
ENSMUST00000174877:4956615	2.39579	3.31737	3.71888	4.60652	1.65167	4956615	65	ENSMUST00000174877	443	cdna:putative chromosome:GRCm38:11:106349455:106353288:-1 gene:ENSMUSG00000001027 gene_biotype:protein_coding transcript_biotype:processed_transcript	ensembl_cDNAncRNA	Scn4a	chr11	106349455	106353288	-	GCTGGTGTAGAGACTTTCCAAGAAGTTCTGCGAACAGAGAAAGGAAGACCGGAAACTGGATGGTG
ENSMUST00000175862:5033183	1.50364	2.68122	2.46374	3.56046	3.08888	5033183	331	ENSMUST00000175862	2136	cdna:known chromosome:GRCm38:15:6836758:6874268:-1 gene:ENSMUSG00000022146 gene_biotype:protein_coding transcript_biotype:retained_intron	ensembl_cDNAncRNA		chr15	6836758	6874268	-	CAAACGGTTTACTTAGGAGATCACAAGTTTAAAGCTGTCTTTAGCTACATAACCAAAATACAAACAAAAACATGCCTTATTTCAAACCAAACATGCTGGTGCACACCTGTAACTGGAGAGGCAGAGGCAGGAGGATTACTACAAGTTGGAGACTTGCCTGATGAACATAGTGAGTTCCAAGCTAACCAGGGATACATTGAAAGACTTTGCCCCCCAAACAAAAAGAACAACCCAACAATACATGATAAACTACTCCATCAGGCCCTTACTTCAACATTGGTTCATAGTGTGGATGATCTGTTGATAGTGGGTCCTGCAATTGATCTAAATA
ENSMUST00000175979:4489682	6.4056	5.16932	4.83691	3.88809	5.19048	4489682	62	ENSMUST00000175979	2391	cdna:known chromosome:GRCm38:10:25169090:25238717:-1 gene:ENSMUSG00000039166 gene_biotype:protein_coding transcript_biotype:processed_transcript	ensembl_cDNAncRNA		chr10	25169090	25238717	-	TTGCTGTCAATGGATCGTCGTCTTCCAAGTGGTTTCCCACTTAACCCCAGAGTGAAAACTCG
ENSMUST00000176122:4620037	3.61446	2.73214	1.56003	1.48769	2.20994	4620037	471	ENSMUST00000176122	3607	cdna:known chromosome:GRCm38:14:39009187:39472666:-1 gene:ENSMUSG00000041014 gene_biotype:protein_coding transcript_biotype:retained_intron	ensembl_cDNAncRNA		chr14	39009187	39472666	-	CAACTACCATGTGCAGTGTTATACATAGGTCCTATCTACTTCACCCTCTAATACCTTTCCCTGTTCCTAATTTTTTTTTTTTTTGGTTTTGATCCCTATTCTTCCACATTTTTCCTGTTTCTACTGTCCAGTATTTGATTAATACTTCTACAGTGCATTAATTTTCTAGTACTTCTAAGGTCATGTATTGACTACATAGATTGACCCCTGAAATCAGTTTTCTCCCAATTAGGCATATTAGAGGTCAGTGATTGAGGCAACATTATGGTTAGTTTCTCTTGAGGTCTTTTGAGTCTTCAGGACATATTCTCCCTGTGCCTTCTCATTGTGCCTCCTTTGTAGATGTAAGAGTCCATACTCTTCTTCTTCCATGGACACAAGTTAGTCACAGTACTACAT…
ENSMUST00000177009:4361394	2.35625	3.31823	3.78087	4.92096	2.62828	4361394	159	ENSMUST00000177009	879	cdna:pseudogene chromosome:GRCm38:7:10549557:10550435:-1 gene:ENSMUSG00000093595 gene_biotype:pseudogene transcript_biotype:unprocessed_pseudogene	ensembl_cDNAncRNA	Vmn1r-ps49	chr7	10549557	10550435	-	GAGGAGTATATCCATTGGCACCAGCTGCTTTTTGAGTGTTTTCCAGACCATGACAATCAGCCCCAGGGAATCCTGTTGGAAGAATCAAAATGACAAAGCTGGGAAGTATATTGGCTGCCCCATTATCATTCTATGGGTCTTCTACATGTTGATAAATTT
ENSMUST00000177011:5369670	5.10424	2.99768	3.75154	2.77748	3.70772	5369670	228	ENSMUST00000177011	4145	cdna:known chromosome:GRCm38:15:76733457:76818129:-1 gene:ENSMUSG00000033697 gene_biotype:protein_coding transcript_biotype:retained_intron	ensembl_cDNAncRNA		chr15	76733457	76818129	-	GTTGACCTCGTAGACCATTTCTTTGCCCTTTCTAAAGAGCCTTCGAGTGTACTTGAGCTATAGGGTATGAAAACGAGTCTCCTCTGCCCAGCACAGCGTGAGGCACGTGCAACATCTCAGGCGTGTCCTTGAGTGAGTTAGTAAGAAAATGAAAACTTAGGAGGTGACTAGGGGCTTAAGGGTCATCTAGCCAGGAAGGCCATAACTGGGCTGTTTCTGTAGGACCTC
ENSMUST00000177263:5278704	1.7416	2.84029	2.9702	3.89858	2.05103	5278704	360	ENSMUST00000177263	5487	cdna:known chromosome:GRCm38:15:6854987:6874296:-1 gene:ENSMUSG00000022146 gene_biotype:protein_coding transcript_biotype:retained_intron	ensembl_cDNAncRNA	Osmr	chr15	6854987	6874296	-	CCTCTGGCGGCTCAAAACATTAATACCTATTAAGCAAAGGTTTTTGGTTCTTCTCCCTCCAATGCTGGCAACTACCAGACCTCCCTCTTGCTGTTTCTACAGGTTTACCTTTTCTAGATATTTCACATAAGTGAAACCATGTAATACGTAACTCTGGATTCTTTTACTTATCATGTTTTGAGTTCCATCCAATCAGTAGCATGGGTCACCCACTCTCTCCCTTTTTACTACTGAGCAGTATAGTTGCACTTTATGGAGAAATCACCTGAAGTTTTTCCACCCTTTGCTGTTTGTAAATGGCGCTAATGCAAACATTCACAGGCAGATGTTTTATTGAATCCGGTTTCACTTGGGAGATGA
ENSMUST00000180470:5254009	5.81526	4.35046	4.88085	3.73668	5.13898	5254009	124	ENSMUST00000180470	572	cdna:known chromosome:GRCm38:5:64802473:64804116:-1 gene:ENSMUSG00000097640 gene_biotype:processed_transcript transcript_biotype:antisense	ensembl_cDNAncRNA	RP24-448C16.2	chr5	64802473	64804116	-	CTTTGCGCCGCATCTGCTTGCTTCTCTCTCTTTCTCTCCTTTTTTTTTTCCCTTCGGAGAAAGCAGGACGCGGAGAACGGGTTCGGGGTGCAGCGAGGGCTCCTTCGGGCTTGGGAAAGTGCTT
ENSMUST00000181224:4537638	4.92928	5.03355	6.41166	8.0198	7.9444	4537638	71	ENSMUST00000181224	656	havana:lincRNA chromosome:GRCm38:7:75769762:75782099:-1 gene:ENSMUSG00000097415 gene_biotype:lincRNA transcript_biotype:lincRNA	ensembl_ncRNA	RP23-285C18.2	chr7	75769762	75782099	-	CCAGGGTGTGCACCTTGAGACGTTCCAAGGCCCCTGCAGGCTTGATTTCAGTTCGGAGGTCCACAGCTGCA
ENSMUST00000181622:5461817	4.50823	2.09646	2.23913	1.90727	3.19515	5461817	243	ENSMUST00000181622	426	havana:lincRNA chromosome:GRCm38:3:88222664:88224302:1 gene:ENSMUSG00000097156 gene_biotype:lincRNA transcript_biotype:lincRNA	ensembl_ncRNA	RP23-168E14.7	chr3	88222664	88224302	+	CGCCATCTTAGGTAGCTAGTGTTTATAAAATGGCCGCTTCTGAGAGATGTGGGCTGAGTGCCAGGCAGGGTGGTGGGCACGAAGGAGAATGACAACAGAAGGAAGGGTTTCCCAGCTGACCAAGAACAGACCTGAATATCACTATCAGTGGGATTAGAAAGGGAGGCGGATGGGGGGGGGTCTCCCAGAAGAGTTCTAGGGTTCAGCATCTAAGCAGGGTAGTAGAAGCCTCATCCCTGTGTA
ENSMUST00000181926:4559970	4.92441	3.62419	4.20614	2.30573	3.57813	4559970	181	ENSMUST00000181926	742	havana:lincRNA chromosome:GRCm38:3:118433922:118516711:1 gene:ENSMUSG00000097311 gene_biotype:lincRNA transcript_biotype:lincRNA	ensembl_ncRNA	mmu-mir-137	chr3	118433922	118516711	+	AGGCACCTCATCTCTGAAGACGTGATTCAAGTTGTTACACTTGCATAGTGGGAATGGTACAGGCTATGCAGGAGACATGATTATAGAGTGGCTTGGAAGATGATCTTTTTTAGACAATCCAGAGCCTGAACCCCTGCTCCCTCCTCTCTGCTGTGTATGTCATCTTGGCAGGAGTCTTGGA
FR0068816:5181451	2.19114	4.12403	4.07083	4.43415	2.49653	5181451	92	FR0068816	2894		fRNAdb		chr8	68454620	68457512	-	CTGCAGTGGCATGACAAAAGATTTCAAATGCCAAATAACTCAGCTTGGGGATGTGATGGAGCTGAGCTCTGATTCATTAGAAAGGTTTTCAG
FR0400905:4310273	2.42488	4.25265	4.25265	6.01131	5.38983	4310273	95	FR0400905	930	coding (noncoding) transcript	fRNAdb		chr7	11478208	11479567	+	CCATCTAGAGATTGTTCCCAGAACACTCCTAAACTTTTCACCCCAAAACTCCTCACCCTAAAGTTCGAACCCTTCCAGCTAAAAACTGTTCCAAG
n197566:4465506	8.10382	7.42812	6.37951	5.5389	7.32366	4465506	465	NONMMUT071966	2742	| NULL | ncRNA | Mus musculus | non-protein coding (noncoding) transcript | fRNAdb v3.0 | FR051915 | http://www.ncrna.org/frnadb/detail.html?i_name=FR051915 | -1.1752700 | -0.3463368	NOCODE4.0		chrX	20101472	20104214	-	CTTCTCCAGAAAGCGCTAGTAGTCAAAGACAGTACTATTTTTAAAATATTGCTTTAACCAACTAGCTTTTCCTTCAATTCCAGATGAAACCCTGCTTCTGTAAAGCTTCTTTGTCTAAAAGCAACATCGCAAGCAGCAGTGAGAAGCTGCTGGAAATGCTGCTCTTTTGACCATTTCTTTTCATTGCTGAATCTCTAACTCCAGCTTCCTGAGTTTCTTGAATGTTCATAGTCTTGTCATGAAAATACAGCTTCATCATTCAAATCTTCTCAGCAAACATTGTGTGGCTTGCTTATCAAGTTTTCTGTATGACTTCAGTATTCTCCACCATTTCCTTGTGTGCTTTAAAGCTGCTCTCTCAAGATTTTATGGGAAAGGCCCACATGCTCAGTCTGTTCA…
n263537:4610943	7.5935	4.94647	5.46679	5.32898	6.79099	4610943	88	NONMMUT015697	1500	| AK157178 | mRNAlike lncRNA | Mus musculus | Mouse noncoding transcript | FANTOM3 | F830206C10 | http://fantom3.gsc.riken.jp/db/annotate/main.cgi?masterid=F830206C10 | -1.2723300 | -0.2238149	NOCODE4.0		chr12	109541003	109545319	+	TAGGGGCTCTTTAGACAACAGGATGTCCGGGAGACTTTGAGTAAGGACACGAGTGTGCGGTCATTTCCAGGGCACTTTCTACATAATG
n263537:5520244	5.11815	2.71076	2.76889	2.83374	4.20743	5520244	300	NONMMUT015697	1500	| AK157178 | mRNAlike lncRNA | Mus musculus | Mouse noncoding transcript | FANTOM3 | F830206C10 | http://fantom3.gsc.riken.jp/db/annotate/main.cgi?masterid=F830206C10 | -1.2723300 | -0.2238149	NOCODE4.0		chr12	109541003	109545319	+	ATGGCACCCGTGTCCAACTTTGACCCCTTCTCTTACCTAATGTGGCAAGAGTCCAAGTGTCCTCCGTGTGAATTTAAGTTCAATCTCATGAGTGAGTCCGGGCTCTCCCAGTTCTCTTTCCCACCTACCTCTTTAAAAATCATGAAAAAATAAAAAATAAAAATAAAAATCAATGCCAATTCACCCCTCCTCTCTAGACACTAGGCTACCCCCTTTGACACATGAATGACAGGAATAACATGGTCACATTATGTAGAAAGTGCCCTGGAAATGACCGCACACTCGTGTCCTTACTCAAAG
n263557:4726960	4.09375	1.88321	2.52952	1.49796	3.04476	4726960	159	NONMMUT043560	2125	| AK086423 | mRNAlike lncRNA | Mus musculus | Mouse noncoding transcript | FANTOM3 | D930027K06 | http://fantom3.gsc.riken.jp/db/annotate/main.cgi?masterid=D930027K06 | -1.3152100 | -0.3558032	NOCODE4.0		chr3	79641610	79643735	-	GTTATAAACCCAGAACCAGCATTTGTTCTGTCACTCCATACTGAGTTCTCCAGTGGCTTCGCTCTAAGTTAGTGTTATCATGAGGAAACAGAACAGGACGGTAGGTAGAATATTGCAAAGGGGTAAGCCAGAGAAGCAGGACTGATGGCATTTAGATCA
n263595:5235432	4.48845	2.90567	2.75118	2.39621	2.90084	5235432	394	NONMMUT009297	1241	| AK138555 | mRNAlike lncRNA | Mus musculus | Mouse noncoding transcript | FANTOM3 | A330062J22 | http://fantom3.gsc.riken.jp/db/annotate/main.cgi?masterid=A330062J22 | -1.4847500 | -0.3150002	NOCODE4.0		chr11	36504805	36506045	-	CCTCAGTGGTAGTTCCAATATGCCAGTTAATGCATAATGTTGCCCTGCATGAGACCTGATCAAAAAGCTTTATAGCTGTTCAACTCCTATGGTTTGAGAAGGAAAACATGGGGCCAGAAGGCTTCCAATGGAGGGGCCATGTGGACAGGCCAAGTGACTGGGGCAGGATCTTGTTAGGAAATGAGGCACCCTGTCTTCAGAATACTCCACATTCCAGAGAGACCTGTGATTTAGAAGTGATGTTTAAGGTGACTGTGAACTGACAAAGGGGCCAGCAGGCAATAAATGCGTAAAGCAAAGCAGTCCTTTCTCTTTCTTCTCCATGTTTGAAAACCTTCCCATTAAAAGAAGACAATAAGCAACCGCCAGCAAGCATGGGTCTGCCTCATTAGGA
n263881:4518560	2.27095	4.46621	3.89378	4.4522	2.82198	4518560	148	NONMMUT022606	1054	| AK159057 | mRNAlike lncRNA | Mus musculus | Mouse noncoding transcript | FANTOM3 | K530046D04 | http://fantom3.gsc.riken.jp/db/annotate/main.cgi?masterid=K530046D04 | -1.5906100 | -0.6362234	NOCODE4.0		chr15	4432331	4433381	+	GCCATGCCTAAATGGGATTATGCTGAGTAACTGACTTGGGAATACCCATATCAAATTTTTTGTGGTACCATTAATTAGGTAGGGGCTTCTGGACTGTGCAAAATGGATTAATAGTTTTGAGCACCGGCAGGCATCCATTGTTGATGTA
n263882:5143179	5.70509	4.67559	4.1622	3.68616	4.54621	5143179	263	NONMMUT037649	810	| AK159058 | mRNAlike lncRNA | Mus musculus | Mouse noncoding transcript | FANTOM3 | K530046H05 | http://fantom3.gsc.riken.jp/db/annotate/main.cgi?masterid=K530046H05 | -1.2594600 | -0.3486534	NOCODE4.0		chr2	66343806	66344616	-	TACTGCGGAACCTCTGGAAATGTGCCCCACTCCCTGATAGGGTTAGGGCAGTTTCTCAGTCTGACCACCAGAGTCTTACAGAGTAGAGATGCGCACCTGAGCCCAACTTAGAGCCATGTTACTATTTCCAGACTGGCACTTCCTTCTACATAGTGATACAGTTCCAACCACCATTAATTCATAATTATATTTCTTTAGGAATTACATAAGGCCTGGGAATAGTTCACTGGAGGAGTGCTTACTTAGCACTTGTTGGGCCTGGC
n263980:4542666	3.88084	2.668	2.75715	1.86314	4.23104	4542666	72	n263980	1767	| AK158738 | mRNAlike lncRNA | Mus musculus | Mouse noncoding transcript | FANTOM3 | K230308O10 | http://fantom3.gsc.riken.jp/db/annotate/main.cgi?masterid=K230308O10 | -1.1011200 | -0.3372705	NOCODE3.0		chr3	134236494	134238385	+	TAAATGTTTGCTGTCCGGTGGGATTGTAAAAGTAGATTAATGCTGGTCTCCAGCAATAAAAACCGTGACTGT
n264594:4945727	3.69389	5.09513	4.96487	5.71432	3.73181	4945727	115	NONMMUT043365	527	| AK144610 | mRNAlike lncRNA | Mus musculus | Mouse noncoding transcript | FANTOM3 | G730009N23 | http://fantom3.gsc.riken.jp/db/annotate/main.cgi?masterid=G730009N23 | -0.8198170 | -0.2304749	NOCODE4.0		chr3	65829115	65872281	-	TGTTCAAATGGGTGCAAACCAAAGCACACTTTTGGAGTACTGTAATGAAGAAGGAGCAGGGCTATCCACAGGCACCCAGGGGCCAACTCCACAAATGCTCCTAATTCTACCTGGG
n264637:5513185	6.28843	4.95021	5.46621	4.17161	5.51605	5513185	57	NONMMUT050612	1157	| AK144492 | mRNAlike lncRNA | Mus musculus | Mouse noncoding transcript | FANTOM3 | G630078N12 | http://fantom3.gsc.riken.jp/db/annotate/main.cgi?masterid=G630078N12 | -1.0311400 | -0.1274944	NOCODE4.0		chr4	148804485	148891928	+	TGCCCGCAGGCGCAGACAATGCTGGGGGAGCCTTTGAAGTCCGAAAGGGATGCCGCG
n264718:5133965	7.73162	6.57045	6.64	5.31103	6.7378	5133965	540	NONMMUT061426	2459	| AK165737 | mRNAlike lncRNA | Mus musculus | Mouse noncoding transcript | FANTOM3 | G630034N16 | http://fantom3.gsc.riken.jp/db/annotate/main.cgi?masterid=G630034N16 | -1.1124600 | -0.3911075	NOCODE4.0		chr7	59306560	59309012	-	GACCACGATATGTACACTCAATTTGTTTGCTGCAGCTGCCAAGTTTCCAGAGAAGTTTTGCTGCAGGCTGTGCTTTTATGCCATAAGTTTGAAATGTTCTACACTACTAAAAGGTATTTTTTAACTCGTAAGTATTGTTCCATGACAATCTAGTAAAGCAATCATGAAAAGGCAGCCATATTAATGTGGTAACATGCCGAGAAAAACTGATTAGGAAGCAAGTGAGAGTTTTTTTTTTTACCTCTGAAAACTTTTTAGGATTTTTTTTTCACTTTCTTTTAAATATATTGATGTTACTTCTGTTTGATAATCTATATTATCATTTGAAAACTTTCACACAGATATAGTATCACAACTACTTCAATACTGTAGTGACAATAAACTGAAGAACACAAATCT…
n264784:5571359	4.6295	2.45713	3.02122	2.59279	3.41941	5571359	361	NONMMUT055921	2442	| AK144305 | mRNAlike lncRNA | Mus musculus | Mouse noncoding transcript | FANTOM3 | G630012K08 | http://fantom3.gsc.riken.jp/db/annotate/main.cgi?masterid=G630012K08 | -1.2739100 | -0.4097852	NOCODE4.0		chr6	21498747	21501100	+	TCTGGCTGTTATTCTGCACAAGTCCAAGTCCTCAACCCCTTGAACAATCTTGAAATTAATATCTATCAACTGTGATGGGGAAATAATTTTAAAGTACAAAATTAGAGTAAAAATTGTAATTAGACCTGAGCCAAGTTACGTGCAATTCCTTTTTAGAGCTTCTGAATATTTAGCCACTTTCTGAATTTTTAACCTATTTTCTGGGAGTGGTTCTTATTCCAGGACACCTACTTATATTCACAATGCTACTGTATAGGTTTAAAACAGCATAGTACAAGCTGTTATACCTGAAATAAGCTCAAGATTTTTATTTCTGATTCTGAAAGCACAATTAAGTATTTGGCAGGACTTCATTCTCTTC
n264806:5497083	4.55537	3.30655	3.86786	2.39466	4.2486	5497083	658	NONMMUT051340	3118	| AK144278 | mRNAlike lncRNA | Mus musculus | Mouse noncoding transcript | FANTOM3 | G630006N11 | http://fantom3.gsc.riken.jp/db/annotate/main.cgi?masterid=G630006N11 | -1.1413800 | -0.3619827	NOCODE4.0		chr5	19198482	19201605	-	TGAGCTCGGGTTTATCACATAACTGCCACACTAGGGAGAATAAATAGAGAATGGAGGGAAGTTTTATTCTCCAGCCAACCAGACCTTCCCTAGATAACCTCTTTTATCTGTTTGACAACCTAGCGTTCAAGAATTGCTCAGATTCTCTCACCCTCATTCTTGCTTTCCATCTCTCTCTGAATATGTAAAACTGAATTGAATACTTTTCTGGGTTTGCATGCATTTTCAACATATTATGTAACATATTTCATTTTCCTTTTTTCTTCCTATAGCATTACTTTTTCCTTTTATGCTTATCTAATTCTCATCTTCACCATGTACATGGATCTACACTCTGATATTTACAGGATGTCCTTTCCCTTGTCATTTAATCATTTATTCTCATGAGTAGATTGAAGT…
n264947:4855371	2.07301	4.19498	2.51848	4.12282	2.25306	4855371	134	NONMMUT070566	1029	| AK089981 | mRNAlike lncRNA | Mus musculus | Mouse noncoding transcript | FANTOM3 | G430042H20 | http://fantom3.gsc.riken.jp/db/annotate/main.cgi?masterid=G430042H20 | -0.9933490 | -0.2812332	NOCODE4.0		chr9	96765574	96782477	+	TTTCAACTACTAAGATGGCCGGCAGTTCAGTAAACTAAGCATCATTCAAGAAGGATGGAGTGCATTCGAAGAACTGGTACCCATGATGACTGGGGTCCTGCAAACCACAGGACATTGACCCTGCCTGAAAGGTG
n265094:4546462	6.19466	5.36557	5.26478	3.53838	4.86043	4546462	726	NONMMUT048370	4721	| AK158290 | mRNAlike lncRNA | Mus musculus | Mouse noncoding transcript | FANTOM3 | F930101C23 | http://fantom3.gsc.riken.jp/db/annotate/main.cgi?masterid=F930101C23 | -1.1284300 | -0.3877795	NOCODE4.0		chr4	102304363	102309060	+	TGCTGGTAAAACTGCCTCGGGATTTGAGACAATAGAAATTGATGTAGACTGGTGTTGTCATGGCTACCTTCACAGAGATGGTATTAATTGAGCTGAGTGTTTGAAGACTGTGAATGATTTAGGTGAATATCAGGGATGTTGGAGGTTTGACTTTGCTTATTTAGACTTTGAAAAGAGATTATAGTCTAGGAACTAAGACATATTAAGCTAAGTTTATTTAATTGAATGACCTTAACTGCAAACAGTTCAGCCACTGGCAGGCTTTACCAATTTTTCAAGTCGCTATATTTGAAGGTAGTTTTTCATAGACACAAGGTGACTCAGGTGTTTAATTGCAGTGAAGGTAGACTTTGTGAAGAACATATTTGTATAAGATGTAGAAGGTGAATTACTTTTGGC…
n265094:4688674	6.03929	5.51826	4.66229	2.50156	4.90279	4688674	354	NONMMUT048370	4721	| AK158290 | mRNAlike lncRNA | Mus musculus | Mouse noncoding transcript | FANTOM3 | F930101C23 | http://fantom3.gsc.riken.jp/db/annotate/main.cgi?masterid=F930101C23 | -1.1284300 | -0.3877795	NOCODE4.0		chr4	102304363	102309060	+	CTAGGGGTCAAATCCTGAGTTATTTGTTGCTTTAGAGATGGAATATATATCTAAATTCCCATACTGATGCTTACTATTAGAGAAAAGTAATGCAGCCATTCTACATTAAAAAGTAGAAATGACTGACTATGGTGATGGCATATGCCTCTAATCAGAGCACCTGGCATGCAGAAGCCAGGGGTCATGAGCTTAAGGCCAATCTGGGCTTCACTGTGAGAATGCCTCAATAACTAAAAAAACATTGAAGTTTGGTGAGGCTCTCTGTACATTTCATCTCTGAGCTGTAGGATTTGGAACAAGTTGTTTGACCTAAGTTTAAAACAAAAAATGGCAGCCATTTCATAGTTGTTGAGC
n265148:4906326	4.97411	3.45106	3.6475	2.85132	4.24075	4906326	396	NONMMUT034449	3591	| AK158023 | mRNAlike lncRNA | Mus musculus | Mouse noncoding transcript | FANTOM3 | F930017I12 | http://fantom3.gsc.riken.jp/db/annotate/main.cgi?masterid=F930017I12 | -1.1297000 | -0.3018294	NOCODE4.0		chr19	32062960	32066540	-	CGTGTGATTCCTGTTCCTGATCCCAGAGAACAACTGTCTTTCCAAGAATATTTGTTTTCTTGAGAAAGAAGAGATGCAAAGGACAATATGGATGCCACCTGAGACACGTGCTTTCTTAAATTAATCCAATTTTTAATTATCGTAAGGAATAAAGAATAAAAAGCTATGACTGTTAATACAGAGTACATGAACTCAGGACCATGCCTTTCAAGGCCCAGAAGTGATAGACACAAGTAATGTTTTAAGAAAATTTGGAACCTAGACAGATGGTTCAGTTATTAAGACCACTTGCTGCTCGTGTAAAGGTTTGGTTCCCAGCAAACTAGGTAGGCCCCTGTAATTCCAGTTCCAGGGAACATGGCATCCTCTTCTGGTCTCTACTAGCACCTGTGCATA
n265475:4586447	4.57431	3.36504	2.82437	2.34012	3.62175	4586447	711	NONMMUT025385	810	| AK157228 | mRNAlike lncRNA | Mus musculus | Mouse noncoding transcript | FANTOM3 | F830207E05 | http://fantom3.gsc.riken.jp/db/annotate/main.cgi?masterid=F830207E05 | 0.3053410 | -0.2376562	NOCODE4.0		chr16	8459645	8460455	-	GAGGCCAGGTCCAATAGGTCACACAGTGTAAAGTACCATTTGCAGGGAGTGCACAGAACAGAAGAGTCAGAACTCTGTGGAGCTAATAAGCAGGCTTGTGGTTATAGAGGGGACAAGGGGAAGGAAAAGAGTGGCTGACAGCTTATTGGAGGCTGGGTCTCCTTGGGGAGATGAAGGGAGAAGGGATGGCTGTTTTGTGCTGGTTTTGTTTTTTTGTTTTTGGTTTTTCGAGACTGGGTTTCTCTGCAGCCCTGGCTGTCCTGGAACTCACTCTGAAGACCAAGCTGGCCTCGAACTCAGAGATCCACCAGCCTCTGCCTCCCAAGTGCTGGGATTAAAGGCATGCACCACCACGCCCGGCTCTGTTTTGTGCTGGTAATGTGGCCGGTGACACACTTT…
n265624:4361270	1.81182	3.1416	3.72716	4.27289	1.72943	4361270	137	NONMMUT021932	1779	| AK156966 | mRNAlike lncRNA | Mus musculus | Mouse noncoding transcript | FANTOM3 | F830110G13 | http://fantom3.gsc.riken.jp/db/annotate/main.cgi?masterid=F830110G13 | -1.2914000 | -0.4528824	NOCODE4.0		chr14	94503661	94505433	-	AGAGGCTTCTTCAGTAAGACTCAGAAGATCGTCAGATTTGCAGGGATTTGAAATATCTCAGGAGGACAGAAAGCTACTGAAATAACAGGGACTATTCTTGGGCTTTTGAATATACCACAGGCAAAGTTTGTGCATTG
n265655:5220005	2.40595	3.55807	4.36883	5.20501	2.06424	5220005	322	NONMMUT001413	5837	| AK156905 | mRNAlike lncRNA | Mus musculus | Mouse noncoding transcript | FANTOM3 | F830106N02 | http://fantom3.gsc.riken.jp/db/annotate/main.cgi?masterid=F830106N02 | -1.2198300 | -0.4361192	NOCODE4.0		chr1	70571434	70577271	-	GCCCTCTATTTTCTTGACATGGAGAACCTGAATTTGGCAGGCTAACCTAAGCCTTCCTGCAATATTGACAAGCAATATGGTAGGAATCAGCCTTGCAGTTGTTTCTACCTTCCCATAACATCGAGAGCACAGACCATACTTGCAGAGATTTTGAGAGGACCACAAGGTGCCTACCCATTGAGAACACCTTGGCAGGTGAGGTGATAAAAGTTACATGCTAATTGTCTTCAGTGTGGGGTACAGTCCTATCTCATTTCTGAAGAAAAGAAAGTTAATAGATAGAAAGAAAAATTGGACTTGAGCCCTTAAGTTCACCAATGTC
n265849:5318301	2.16791	2.33267	2.70054	4.28961	2.46672	5318301	204	NONMMUT026724	2693	| AK172057 | mRNAlike lncRNA | Mus musculus | Mouse noncoding transcript | FANTOM3 | F830033H07 | http://fantom3.gsc.riken.jp/db/annotate/main.cgi?masterid=F830033H07 | -1.2168100 | -0.3129469	NOCODE4.0		chr16	43965036	43973467	-	CAATGTGGTCACATTATTTTGCACAAAAGGCAGGAGTTTGTAAAATTCCAGTTTTAAAGGCTAAGATGTAGACAAAGGGACAAAAAGAGTAGAGCCCAGCCCTCAGCCTCAGCTTGGCTTCGGGAATCCTACTTCATGTTGTAGGCCATCCATATCAAATACTGAATTTAATATTAAAGTCATTCCCAGGATTCACTTACTCTA
n265933:4435248	2.96713	3.666	4.345	5.38898	3.84064	4435248	447	NONMMUT071922	2210	| AK089809 | mRNAlike lncRNA | Mus musculus | Mouse noncoding transcript | FANTOM3 | F830027F09 | http://fantom3.gsc.riken.jp/db/annotate/main.cgi?masterid=F830027F09 | -1.5906100 | -0.3623681	NOCODE4.0		chrX	17280675	17282884	+	GGAAACCAGGATACATGCAGACTTGTATGAACCATTAGGAGAACTCTTTAGGGGATGGAGGTTGACTATGACTTAATCTTTATAATATATTATCAAGAATATGGCCTGGTTCATTGACTATTCTGGAAGCTTGCTGAAAGAGACTATCAAGGTATTTCAATATATGACTTTCCACATTATGGACCTTTTTAGATATTCTATTCCAGTGAACCTTCCTTTCAAGCTTGAACTTGACTTCTTTTTTGACTAGACTTTCCCATCTATTCCTATTCCTGTCTATTTGTCCTCACACTCAGAACTGCTATCTATTGCTCTTCACACTCAGAAGTGTACTTCTCATGGTCTTGCTGGGAATATCTTCCTATCTCTTCTTTGCCTGATTTACCTCATCCTCCAATC…
n266088:4623161	4.29905	4.24914	3.73631	1.86326	4.03495	4623161	202	NONMMUT023968	1578	| AK171854 | mRNAlike lncRNA | Mus musculus | Mouse noncoding transcript | FANTOM3 | F830014O15 | http://fantom3.gsc.riken.jp/db/annotate/main.cgi?masterid=F830014O15 | -0.1686660 | -0.1653617	NOCODE4.0		chr15	75677225	75678803	-	TGCTCTGTTTATGAAGCCCGGCCCGCTCCTTACTTTCTGAGGGCACACCTGGAATTGTTTACTGGCTCAGGACATGGTCCCTTGTCCCCTGACCTCCCCACCTATGCTCACTTTCAGGCATTGTAGCTCCACCACACCTGGTCCCTTCTTTGCAGGAAGAGCGAGAAAGGCCCTTTAAAAAACTATTTGTCTCGGGGCAGCG
n266089:5196731	3.31161	1.78262	4.72586	5.47035	6.73896	5196731	331	NONMMUT003003	2850	| AK089751 | mRNAlike lncRNA | Mus musculus | Mouse noncoding transcript | FANTOM3 | F830014O18 | http://fantom3.gsc.riken.jp/db/annotate/main.cgi?masterid=F830014O18 | -0.2904140 | -0.3206835	NOCODE4.0		chr1	140113669	140116518	-	TCAGCTGTCTTAAGTACCTTCCAGGTGCTGGGTAGGATCCTGCTTCGTCTGGGAAGTTGGTATGATGTCATTTTTCTTTTTTGCATCTAGGGTGGTCTGAGCTCCTTCCTTTCAACTTTGCTTGTCTGAGTGATTCTCAGCAATCCAACTATCTTGGTTACTCTGGTAGGGAGGAGCCTGCTGAATCTGCTCAGTTTCAGGGACTCCCTGAAGCTATTTTGAGTTGTTTACCTCCCTGCTTAAGGGGCTTCCCAGAAGGATGGAGTATTTTAATCTCAAAGAGACTGTTACCCAAAAAATTCCCATGGACCTTCAATGTCTCCAGGCCAGA
n266089:5564783	2.29	1.87794	3.98144	5.21098	5.64207	5564783	402	NONMMUT003003	2850	| AK089751 | mRNAlike lncRNA | Mus musculus | Mouse noncoding transcript | FANTOM3 | F830014O18 | http://fantom3.gsc.riken.jp/db/annotate/main.cgi?masterid=F830014O18 | -0.2904140 | -0.3206835	NOCODE4.0		chr1	140113669	140116518	-	CCTGAGGGTCAATACTAACATGTCAATATAAAATAAAATATAATATGAAATTATTTATTTACCATTCTCATGTGTGAGAATTTTTTCCCACTGGAGGCAATATACAAACATCTACCTACCCAAGATAAGGAGCCCATGACACACCAATGTACAGATACCACCAAATTCCAACTTGATGAACCTTTAGTTGTGCCCAGACTGGAAAAAAAAAAACCAACAAAAATCGAAGAGACCACCAGGAACCACAACTCCAATGCAAGCCCGTGAAAGTCTTTATTCAAGCTCCAGATTGGGCCACAAATTTTTCTGATGGAATAGGAAGGAGAGTGACACTCAGATCTAGGGGCTTAGGGTTTATATAGGGAAAAAATTGCAAGCTGTGGCATTCAAGCCTTGGCA…
n266130:5549985	4.50994	4.16211	2.84024	2.30148	4.07071	5549985	569	NONMMUT071149	2586	| AK156223 | mRNAlike lncRNA | Mus musculus | Mouse noncoding transcript | FANTOM3 | F830012J01 | http://fantom3.gsc.riken.jp/db/annotate/main.cgi?masterid=F830012J01 | 2.2828400 | -0.3168130	NOCODE4.0		chr9	112489684	112492271	+	TCGGCAGGATAGGTGGCTTACCATAAGAGGTTGTTCTCTGCTCTTAATGGGGGACTCGCACAAATGCAGACCCATGTGCACAAGGGAGTACCTACCATCTCCACACACTCTGACCCTCACCGTAAAAAGAGAATTACTTTTCTTTTCTATGCTATTTTGCCTGAAAGTCTCTCTGGTAACCTTGGGCTCCTTAGGCTTTCTGGGGCAATGTTTTGCAAGGTACTTACAGCTTCTCCAAAAGTTGCCCCCTGGGGCCTGGCTAAACCCAGGAGAGAAGTGTTAGAGAAAAATAACTATCCAGAAACTGACAAGAAAATGTATTTTACATGACTGCCTTATTCTATGTTAAAATACATTACCATAACTCTGTGGAGGTGATATTAGCAGTTCAGTAATTTA…
n266210:5398493	4.02456	2.77567	2.5236	1.83367	2.3703	5398493	318	NONMMUT063936	1450	| AK089697 | mRNAlike lncRNA | Mus musculus | Mouse noncoding transcript | FANTOM3 | F830009D22 | http://fantom3.gsc.riken.jp/db/annotate/main.cgi?masterid=F830009D22 | -1.2271700 | -0.2691693	NOCODE4.0		chr7	131785133	131786573	-	CACGAGTGTCTATCTGGATCCAGGCAGGTCTTCTAAAATGAAGCATGGTAGGGGGATGCTGTGAGACTTTGGAGTGGTCAGAAAATGTCTTTGTTGGTTGGTTGGTTTCCTCTTGGAACCCAGCCACCATAGTGCAGTTGAACCAGTCACAGAGAGCAGTTTAATGTGTCTGGTTGGCAGCTCAGAACCCATTGCCATAGGCACGAGACTACCTTGGACATCAGCCTTTCTAGACAACACCACACAAACCAGAAGGTTTGCCTGGCCAACCCGTTGAAGGTTTTGTGACAGAAGCACTGGCTCTTGTTACTCTGGCTG
n266317:5426006	1.40041	1.5911	1.67532	3.71332	2.13834	5426006	336	NONMMUT014029	4352	| AK156036 | mRNAlike lncRNA | Mus musculus | Mouse noncoding transcript | FANTOM3 | F830005D08 | http://fantom3.gsc.riken.jp/db/annotate/main.cgi?masterid=F830005D08 | -1.0318000 | -0.3245203	NOCODE4.0		chr12	40620348	40624690	-	TGTGATCCTCGAGAAAAGCATGTTAGACAGAGAGGCGCTATGTACCACACTATGTGGGTCTGTTGCTCATGTGTGCATGCACAGACAAACAAACACACACACACACACACACACACACACCCCACAATAAAATTTTTAAAAAGGAACAACACAGTAGAATATGGAAACATATTCAAAAGCTACAGATGATTAGAATAAAGCATGTAGCAAATCCATGAACAGCCCAGATGAAAGGTAAAATGAAAGCCATATTGCTTCCTAAGGGTTTCTCTGAGAAATGACTCTCAGGACCTCCCTAGAATGGCAAGAAACATGAACACTTGCAAGGGCCGCGTT
n266602:5142997	3.29378	4.76767	4.62074	5.57254	5.15616	5142997	347	NONMMUT066376	2188	| AK089363 | mRNAlike lncRNA | Mus musculus | Mouse noncoding transcript | FANTOM3 | F730015G14 | http://fantom3.gsc.riken.jp/db/annotate/main.cgi?masterid=F730015G14 | -1.1171000 | -0.1912741	NOCODE4.0		chr8	84200868	84203049	+	CTGAGTCACACTCGAGCGGCGCCTTGCCTCAGGCTGCTGGAGCTAGAACTGGCGCCACCCTGGGTGTGGCTACTGAGCTGTGGCCCTGGGCAGAGCAGGGCTGGGTGGCAGGATGGGCACATGGGCCTTGAGGGACTCGGGGGAGCAAATCTGGGATGCCCGGTGATACCTCCCTTTTGTCTCCTGTGTACATTTGGGGCTCTGGAACCCTAAGCTTTGGGCCTGGGAATAATAATAATTATCGATCTATTAATAAAAGTTTTTGAGGCATGATCTAATGTAATGTAGTCCATGCTGGCCTGGAACTGGATAAGTAGTCCAGGATGTCCTTGAACTGGTCCTTAGGC
n266649:4592328	5.38993	4.07223	4.49428	3.33037	4.34078	4592328	86	NONMMUT057912	1860	| AK155560 | mRNAlike lncRNA | Mus musculus | Mouse noncoding transcript | FANTOM3 | F630324A05 | http://fantom3.gsc.riken.jp/db/annotate/main.cgi?masterid=F630324A05 | -0.8833870 | -0.2893034	NOCODE4.0		chr6	89269510	89285725	-	CTCAGCTCCCGGGTCATGGATGAGCTGACTGATCATCAGCAACTGCAGAGCACATGGAATGCCACCCTTGCAAGAAAACTCCAGAT
n266649:4981690	3.40984	4.558	4.2101	5.66037	3.96642	4981690	290	NONMMUT057912	1860	| AK155560 | mRNAlike lncRNA | Mus musculus | Mouse noncoding transcript | FANTOM3 | F630324A05 | http://fantom3.gsc.riken.jp/db/annotate/main.cgi?masterid=F630324A05 | -0.8833870 | -0.2893034	NOCODE4.0		chr6	89269510	89285725	-	GAGTTCCATTTGACAGGCCTGAAGAAGAGCTGCCATGAAGATATCAATGACAATGGAGATGCCACACCAGGAGAGGAACGAGAACGGCCTGCATGGGGACTGAATTCTTTCTTTCTCTGCACAGGACTAATTTTCCTTCCTTTGTTGTTACAGAAGGTGATTTTCTTACAGAGAAGCATCTGCTCTCACCCTTGTGGCACAGGTGGCCTTCTCCTGCCATCAAGTCCAGAGGAATGCATGCTGCCGGGGCTTAGCAGAACTTCCTCGTCCCTTCTATTCCTGTGGCAGTG
n266670:5438004	2.74406	2.95924	2.57593	5.27726	2.70908	5438004	115	NONMMUT004977	4597	| AK171185 | mRNAlike lncRNA | Mus musculus | Mouse noncoding transcript | FANTOM3 | F630304B17 | http://fantom3.gsc.riken.jp/db/annotate/main.cgi?masterid=F630304B17 | -0.7017710 | -0.2274734	NOCODE4.0		chr10	22306784	22311340	+	CCTTGGTCCCTGGAAGGGATGATCAGAGCATCAGGTTCCTAGAGAGATTCCCTGAGACCAATAGGAAAAGATGGAGCAAACATACATATAGTTCACAGCCTAATCCACAGCCTGG
n266732:4677276	2.5813	3.8094	5.38238	5.42676	3.80479	4677276	115	NONMMUT053428	1253	| AK155231 | mRNAlike lncRNA | Mus musculus | Mouse noncoding transcript | FANTOM3 | F630210B15 | http://fantom3.gsc.riken.jp/db/annotate/main.cgi?masterid=F630210B15 | -0.9870140 | -0.2724158	NOCODE4.0		chr5	104435120	104436372	+	CAACAGTCGTATTTGTTAGTCAGACTCGTGCTGTTCTGGTCTTTTTGAATAAGCTGGTCAGGTACATTGCAGGTTTCCCGGTATTTTCAAAGCCAGTTGGATGTAGAAGTTAAAA
n266732:5230864	1.83844	3.14111	4.6409	5.96156	2.6456	5230864	83	NONMMUT053428	1253	| AK155231 | mRNAlike lncRNA | Mus musculus | Mouse noncoding transcript | FANTOM3 | F630210B15 | http://fantom3.gsc.riken.jp/db/annotate/main.cgi?masterid=F630210B15 | -0.9870140 | -0.2724158	NOCODE4.0		chr5	104435120	104436372	+	ACTCTCATGGTAGTTCGTTGCTTTAATTACTCGATTACTGTGAAACAAATCTTGGTGTGGAGCTCTAGAGACATCAGATAGTG
n266841:4370310	3.89485	3.05556	3.26968	1.79197	3.31924	4370310	655	NONMMUT005989	3975	| AK154604 | mRNAlike lncRNA | Mus musculus | Mouse noncoding transcript | FANTOM3 | F630101D04 | http://fantom3.gsc.riken.jp/db/annotate/main.cgi?masterid=F630101D04 | -0.1340360 | -0.3764136	NOCODE4.0		chr10	67179979	67183950	+	TTTTGATTTTATCTCGGGGCACAGGAATGGCTGACTGGCAGTTGGGCAGACTCTGTGGTTCTCAGTGCTGCTGCTTCTGTTGGGGTCTGATAGCACTTGCAGCATTTCAAAGTCTGTTGTATATATAATTAAACTTGAGTATGTACTGTATTACTACAAGATTAGCCCTGTGAAATAATAGACTTGAATTATTATGTAGTTTAAATTTTAGAAATGTAGAATAAAATGTACTTAGCTATATGAACATTTTGTCTCTGTGTTGTTCAGGATTTAGAAAGAGATTGCCATATATATATATATATTCATGAATATATATATTCATTCAGTGGTAGTCCTTTGTAACATATGTGGCCTGCTTTCCCTATCCATGTGTTTTCTATGTCATACGAATGAGTTATT…
n266967:4913794	3.74317	5.7278	5.64829	6.73593	3.03807	4913794	248	NONMMUT009492	2674	| AK143951 | mRNAlike lncRNA | Mus musculus | Mouse noncoding transcript | FANTOM3 | F530005A15 | http://fantom3.gsc.riken.jp/db/annotate/main.cgi?masterid=F530005A15 | -0.9278540 | -0.2871830	NOCODE4.0		chr11	46673637	46676309	-	ACTGTCTTAAGAATTCCTCCCTATGCTCTCTTTAGCCACTAAATCATTCTTTACTGATTGATTTGTTGATTGGTTGGTTGATTTGAGACAGGGTCTTACTATGTGGCACAGACTAGCCTGAAACTTTCTGTGTAGCCCAGGCCAGACTGGAACTCACAAACCTCCTGCCGCAGACTCTTTAGTTCTGGGATTACAGTTGTTATCCATAATGCTTGTCTCCCATTTTGTACCTTGGATCTAAAACTAGA
n267052:5163471	1.88969	3.28077	4.27824	4.57433	2.98527	5163471	61	NONMMUT071768	1572	| AK143667 | mRNAlike lncRNA | Mus musculus | Mouse noncoding transcript | FANTOM3 | F430008A08 | http://fantom3.gsc.riken.jp/db/annotate/main.cgi?masterid=F430008A08 | -1.1648800 | -0.3349489	NOCODE4.0		chrX	8150280	8151851	+	TACCTCTATAGTGCTAGGGGCCACACAGTTTGGCTCATTCCTCACACTTCTCAAAGTGCAG
n267112:5436357	3.66046	2.21818	2.62843	1.64524	3.2777	5436357	447	NONMMUT042906	1375	| AK089154 | mRNAlike lncRNA | Mus musculus | Mouse noncoding transcript | FANTOM3 | E530017H10 | http://fantom3.gsc.riken.jp/db/annotate/main.cgi?masterid=E530017H10 | -1.5906100 | -0.4278864	NOCODE4.0		chr3	45400625	45401999	+	TGTTTGCACCCTGATTCTTTTCTGATCTCTAAGCAAAGATGCAACTGTGTTGCTTTTTGAAGTACCATTCATCATAAGACCAGGAGTCCATTATGACATAAATAAACTAAATAGATATAACAAAGACATCTTGATGGTATAGACTATCGAATTTTTACGCTAAAAGTGTTTCACAGGAAGGCTTGTGGGAGACAGTCCACAAATGTGAGACTTAAACGTGATCGTCTTTCAGTTGCTGTATATCTTAAGTCTAAAAAATTATGTGGAAAATGGTAAGGTGATCTGAAATGAATGCAGAACTCTAACGGTGCAACTTTGAGATTTATTACATATAAATTTATATTATAAATTATACATGAAATGATTATGTTCAAGGTAAACATAAGTATTTGTCTATTT…
n267144:4589194	2.33267	2.3061	3.03193	4.66111	3.58676	4589194	500	NONMMUT002943	2153	| AK169849 | mRNAlike lncRNA | Mus musculus | Mouse noncoding transcript | FANTOM3 | E430038L17 | http://fantom3.gsc.riken.jp/db/annotate/main.cgi?masterid=E430038L17 | 0.5182060 | -0.3001046	NOCODE4.0		chr1	138117343	138119497	-	CAGGTCACGGTTCCATAATATTGTACCTGTCCATTCAGTGGCCTGGGTGCTTGACAGTGAGTGAGACGTGTAACAGTGGCTTGCTGGCTTCAGGATGCGTCAAGCATGGACAGCAAAGTCCACACATGGGAGAATTATTATTAGGATGATAACAATATCCTCACCTGACCCTGTTGCCCCAGCAGAGCAAAATGGTGTTTTGTTTTGTTTGTGGGTTTTTTTTTGTTTTTTGTTTTTTGTTTTTGTTTTGTTTTTTTTTTTTTTGTTTTGTTTTGTTTTGTTTTGCTTTAAAAGCAAATCCAGACTAGAAATCGGGGAATGGAGGAAGCCATGAACAAGAAGCACACTCCAAGGGCTCCCTTTCACACAAGCCAACCCGGTCTGCTATAATCAAAGAAA…
n267174:5472835	4.27456	2.72813	3.09401	1.9261	3.51627	5472835	516	NONMMUT023796	1696	| AK088992 | mRNAlike lncRNA | Mus musculus | Mouse noncoding transcript | FANTOM3 | E430034L11 | http://fantom3.gsc.riken.jp/db/annotate/main.cgi?masterid=E430034L11 | -1.5906100 | -0.3304561	NOCODE4.0		chr15	66260129	66261788	-	CTCTACTAGTTCCTTGCGATTCTCAAGGTGAGTTTGAAATTATGTCTTAGAGTTTCATTGCTGTGAGGTGCCACCATGACCAAGACAACTCTTATAAGGACAGCATTTAATTGGGGGCTAGCTTACAGGTTCAGAGGTTCAGTCCATAATCATCAAGGCAGGAGCATGGCAGCATTTAGGCAGGCATGGTGCAGGAGAAGCTGAGAGTTCTACAGCTTCATCTGAAGGCTGCTAGCAGAATACTGGCTTCCAGGCAGCTAAGATGAGGGTCTTAAAAAGCCCACACCCACAGTGACACACCTACTCCAACAGGACCACACCTTCTAATAGTGCCACTCCCTGGGCCAAGCATATATAAACCATAAAAGTTGCATTTCGAGAAAAAAAATCACTCTCAAT…
n267192:5136439	4.49292	2.61357	2.26565	2.12789	4.02696	5136439	506	NONMMUT002765	1543	| AK088924 | mRNAlike lncRNA | Mus musculus | Mouse noncoding transcript | FANTOM3 | E430031K19 | http://fantom3.gsc.riken.jp/db/annotate/main.cgi?masterid=E430031K19 | -1.5906100 | -0.2435928	NOCODE4.0		chr1	136163288	136164830	+	TTGGGACCAGTTCAGTGATCAAACCCACCATATTGGGTCTGGTAGCCCACATTTGTAATCTTAGCACCCAGGAAATAGAGGCAGGAGGATCATTTGCAAAGTCAGGGCCAGTCTGGTCTACATGGTGAGATCATGTGTCACAACACAAACAAAAATCAAAAGCACCGTTAAGAAGCACAGAAGGCAATAATAAATAAAGGTTGCAAGCAAGGCACCATCAGGACACCTGCTTCCAGGGTCGGGGTGGAAACAGCCTCTGCGAGAAGCACTCATGCCAGTCACTCAGAATTTTCACTACACTGCTTTGTCTAAGTCTGTGATTCACATAGAAAAGGACTGTGGGACTGCAAGCAGATTCCAACTAGTAGGTGAATCTCCAAATACGCTATGAGGAAGTGA…
n267232:4886528	2.69693	4.84708	4.83957	4.90888	4.65922	4886528	85	NONMMUT003879	629	| AK088748 | mRNAlike lncRNA | Mus musculus | Mouse noncoding transcript | FANTOM3 | E430025C02 | http://fantom3.gsc.riken.jp/db/annotate/main.cgi?masterid=E430025C02 | -0.9903740 | -0.2998362	NOCODE4.0		chr1	173848971	173913129	-	CTCTGAGAGTTTTGTAATCACTACCCTCTTCCTTTACACCCAACTGTTCAGTTTCTCATTTACTGACTTATCTGCCTACCTACTC
n267237:5093162	2.46329	3.75627	4.08426	4.56187	2.74683	5093162	318	NONMMUT074070	4524	| AK088724 | mRNAlike lncRNA | Mus musculus | Mouse noncoding transcript | FANTOM3 | E430024G05 | http://fantom3.gsc.riken.jp/db/annotate/main.cgi?masterid=E430024G05 | -1.2942100 | -0.3621019	NOCODE4.0		chrX	139754835	139759357	+	TCTCCTTGCTGTAGCCCATAGCGGAGATAGGAAGAGTTTCTTTATTTTGCTTGTGTCTGCTCTCTCCAATTTCTCCTTCTCTGTGTGCTCAATACAGCTTTCTTGTCACCACTGTCAGGGCACTATCAGTTCCTACTCACAGGTCAGCCTGTCACATTGGAAGCTAGTGTGCTCTTGCAGCATTCTGTGGAAAAAACAGAAACATTGCCCCCTTTCCCCCATATTAGGTATCTGAACAGGATCTTGCCATGTGCCAATAAGTAGATCCCTTCATCTCATGAGTATGCCTGGTTTTAGGGTGCCATAGATACTCAGAGA
n267299:5459356	6.62503	5.67554	5.66804	4.60794	5.74941	5459356	245	NONMMUT060134	2105	| AK153978 | mRNAlike lncRNA | Mus musculus | Mouse noncoding transcript | FANTOM3 | E430018F19 | http://fantom3.gsc.riken.jp/db/annotate/main.cgi?masterid=E430018F19 | -0.3849080 | -0.2261014	NOCODE4.0		chr7	19138091	19140172	+	CAGTCGGTCACCTAGGATTTGCTTAGTGTGTGCAAAACCATCCATCTAAGTAAGATGAAGTGCTAATAATGAGGGAGTCCACTAGTTCTAGTCAACTTCAGCACAGTTCCTGGGAACCTGAGCCATAACTCACAGAAGAGCCAGGAATGATGACACAGGTCTGTTCATCTTTGCTCATTAAGTTCAAGGCCTGCCTGGGATAGAATGAATTCCAAACCTGCTTGGCAATTTAGTGAGGCCCTATC
n267363:4787829	3.16791	2.07724	3.03149	5.24623	5.01093	4787829	1074	NONMMUT002944	2574	| AK088215 | mRNAlike lncRNA | Mus musculus | Mouse noncoding transcript | FANTOM3 | E430007G18 | http://fantom3.gsc.riken.jp/db/annotate/main.cgi?masterid=E430007G18 | -0.4668630 | -0.4227033	NOCODE4.0		chr1	138123872	138175245	-	GCTCATGCTGCCAGTGTGTTAAAAATTCTTTAATGACCAAATATAGATGTTAAAATTCTCTAAAGCCTAAACACACAGAGGAAGTGACCTGCAGGTGGGTAAAGGGAAGTTAGATCCCTTGCATGTTTCTGTTGCTGTAAATGCTTGTTTCCTGGTTAATCATGTGACTGACAGTATGTCTTAAGAAGGTAAGTGAGACCGTAAAACATGAGTGTTTTAATAACTTAAATGCACATTTCAAGGGGAGCAAATCTGAAATGCTAAAAGTTGATTATCCTAGGAATTATTTGTCATTAAATGCAACACTATGCAGATACTTACAAATCCCACTCCTGAGCCTTTAAAAAAAACCACATTCTTTTATTTTTTCAATGTCTAATATTGGAATTGTATAGTTTT…
n267366:5075378	5.13936	4.69022	3.88459	3.0785	3.9872	5075378	578	NONMMUT055621	1370	| AK088178 | mRNAlike lncRNA | Mus musculus | Mouse noncoding transcript | FANTOM3 | E430005J01 | http://fantom3.gsc.riken.jp/db/annotate/main.cgi?masterid=E430005J01 | -0.8140010 | -0.3622644	NOCODE4.0		chr6	5776224	5777594	+	GGGTCCCATTTGCAGGGATTCCTTAAAACTGCTTAGGGCCCAGAAGACAAGGACTTCTGATCCTCAGTACAACACGGCAACATAGCCAACACTTTAGTGACAGGGCTTTCTTCTTCAGTGTGGAGAGGGTCTTAAATACCTTCTTAAATACCTTCTGAGAGCATATACTGGCATCAGGACATACACAATGGAGTTATTTACCATAGTGGGTCACATAGAGACACACAGAGACATACATACACACAGAGACACACACACAGACATGAAGGTAGATGGATGACTAGCTATGAAGAGGAAGAAAATCATCAGGAGGAGGAGGAGGGGAATAAGGGGGTAATGGAGGTAAATCTAATCAAATTCAATATATACATGAATGTCACAATGAGAATATATTCAATA…
n267567:4360793	1.89546	3.79314	3.62454	4.17024	2.76561	4360793	235	NONMMUT002577	1915	| AK054408 | mRNAlike lncRNA | Mus musculus | Mouse noncoding transcript | FANTOM3 | E330023B05 | http://fantom3.gsc.riken.jp/db/annotate/main.cgi?masterid=E330023B05 | -1.5906100 | -0.3675306	NOCODE4.0		chr1	131914528	131916439	+	GCAGGCTGATGATATTTGCACAAGATAGGAAGTGTGGAGACAATACATTGATGGTGTAAGGGAAGTCAGTAGAATTGTAGTGTGAGATTGACTGTGTAAAGGAACAAAGACAACTGGGTGTCTGTGTTAGCAGCGTAAAGTAGAATTAGTAGAGCAAGGGCATAGCCCTCGTTTATTCTCCTCTATCACTTATGAGCCACACTGTTAAATTTCCTTGTGGGTATTACTGGGCAGA
n267639:5026957	1.55287	3.38402	2.92812	4.55356	2.32796	5026957	587	NONMMUT073155	2606	| AK087745 | mRNAlike lncRNA | Mus musculus | Mouse noncoding transcript | FANTOM3 | E330015B21 | http://fantom3.gsc.riken.jp/db/annotate/main.cgi?masterid=E330015B21 | -1.1673400 | -0.3209934	NOCODE4.0		chrX	93369700	93372242	-	AGGGCCCTAGTCTTATCTTGCTATCAGCTGAGCAGTTTGCCCATAAAATGAGCACAGCTGTATTACTCTGAGAAAATGGTCTCCAAGGAAGGCAGTGATTAGTTCTAAAACATGAAGGGGATTATAAAGGTACTCTCTTTCTTGAAACCAGAAGATAAGGATTTTACTGTAGGAATTATTTGCAATTTGGAGATGTCTAAGCATCTCGAGTCAGGTTGCCTTTCGGTATTAAGGATTTCTATTTCTTGGACTGCTAAAGTCAACATGCAGGAAGGCTCATTATTGCTAGAAGTACTGAAAAAAAAGTAGCAAGGAACCCCTGGAGTCTTCTCTCAGCCAGTTGACATCCTTAGAATTTGCTTGGTTCAGTCCTTCAGGGCAGTGGAAATAAAGCTGTGT…
n267652:4736098	2.01744	4.11281	4.09853	4.04136	1.65167	4736098	402	NONMMUT030875	2619	| AK143354 | mRNAlike lncRNA | Mus musculus | Mouse noncoding transcript | FANTOM3 | E330014F01 | http://fantom3.gsc.riken.jp/db/annotate/main.cgi?masterid=E330014F01 | -0.7617650 | -0.3003418	NOCODE4.0		chr17	83749677	83752296	+	GGATTATTAGCCTGCAACTTGTAGCTCTTAACAGTGGCTCTCAGTGAAGGATGGCCTCCCATAGAACATTAAATGGGCCCGGGAAGCTTTGCTTGTCACAATTGGATACTGATGTTATCTATGTTGCAGTTGCTGCTACCCATAATTCAGGCCCTGCAACAAAGACACGCCTATTCCCATGGCAGCCAGTGGTGCCAAGCCCAAGACACCTGATGGAGAATTAGCAGCTTTGTGTGTGTGTGTGTGTATATGTGTGTGTGTGAGTGTGTGATGTATAATATCTACATGTACTAGTGCAGTTTACCTGCTTAAGATCCTTCCTTTAGCTTTTTGTTTTTAAAAGAAATCACACACACACACAGTGAGCCTGGAACTCACTCGGGTGACTTTAAGCTTGTG…
n267659:5450166	2.39225	3.56623	3.44112	5.62025	2.36526	5450166	586	NONMMUT003922	1897	| AK054300 | mRNAlike lncRNA | Mus musculus | Mouse noncoding transcript | FANTOM3 | E330013D07 | http://fantom3.gsc.riken.jp/db/annotate/main.cgi?masterid=E330013D07 | -1.2520300 | -0.4407895	NOCODE4.0		chr1	177035044	177036936	-	GTGCAATGCCTACTTTGGTGGTTTTAATTTATGGCATATAAATATTTATGGTGTATAAATATGGTATAGACCTTGATTCCTTTTATATGTTTTACATAGGATTGAGGTCAGATATGTAAACTTCAATTAAATTATATGGTTACAGAAAAAAAATAGACTTATTTCAAATTTCTAGTTCTATGTCAAGAATGCATTGAAAGCATCGATATAATTTACATATAAAGCTTTACATATAACATAGTTAAACAGTATATGACATTGTTGGATTCATTTTATGTATACATTTTATATATTCCTTCTATTTCCAGTATATATACACATGTGTGTATATACATATATATGTGTGTATATATATGTGTGTGTGTATATATATATGTATATATACACATATACATATAT…
n267668:4457608	5.02594	3.60187	3.61651	2.98899	4.96534	4457608	86	NONMMUT042271	1630	| AK054291 | mRNAlike lncRNA | Mus musculus | Mouse noncoding transcript | FANTOM3 | E330010P06 | http://fantom3.gsc.riken.jp/db/annotate/main.cgi?masterid=E330010P06 | 5.4866800 | -0.3166157	NOCODE4.0		chr3	24551545	24552050	-	AAATGAGCGTTGAATGGTGAGCACCTGGATGAAGAGGCCAGGGATCAGACTGTCAGCCTCCTGCTACAGCAAACGCCCTCCCATAT
n267700:4611662	5.04885	3.77869	3.38652	2.60778	4.71639	4611662	555	NONMMUT045184	3041	| AK087689 | mRNAlike lncRNA | Mus musculus | Mouse noncoding transcript | FANTOM3 | E330005N08 | http://fantom3.gsc.riken.jp/db/annotate/main.cgi?masterid=E330005N08 | -1.1692200 | -0.3432608	NOCODE4.0		chr3	127266672	127269708	-	CTCTCTATAATACGCGGGAGGCATTTAGGACTTCTCCTGTTTATAAGCTTTCCATACTTTCAAAGTACAAACTCTTAATGGGGCCTGTGATTGGGTCCTTGTCATGGTTAATCTTTACTGTCACCTTGACCAGATTTAGAATCACCATTGAAAATCTCCTCTGAGGAGGTGACAGATGCCCATTCTGATAGTGTATGCCTTTAGTCCAGCACGTCAGTGGCAGAGGTAGGTGGATCTCTATGAGGCCAGCCTGGCCTACAGAGTGAGTTTGAGGATACCCAGGGCAAAATAGAGAAATGTAACTCAACTGACTCAAAAAACAAGACAAAACAACCCAAAGAAATAAAAAGAAAAAAGATGGAGACAAACAAACCTAAACTGAATAAATCAAGCTGTGCT…
n267830:5000364	3.74214	2.22559	1.92548	1.6806	2.34135	5000364	229	NONMMUT020707	2052	| AK087604 | mRNAlike lncRNA | Mus musculus | Mouse noncoding transcript | FANTOM3 | E230023M02 | http://fantom3.gsc.riken.jp/db/annotate/main.cgi?masterid=E230023M02 | -1.2657900 | -0.3502312	NOCODE4.0		chr14	49680172	49682224	-	ACTACTATGGAAGGAGTGGGCCACCAGTGTCTTTTGGGCTTTAATAGATAAGGTCAGCATTCTTTAGAGAAAATGGCCCAGTGGCCAGAGTTCTCATATACAAAGGATCTTTGGGCATCCCTCATAGGGATGATGGACTGTTAGATCCTTTCTCATTTTCCTTGGGATGTAATTTTCTCTTCTGTACCAAATAACACATTCAAACACCCTCTTTGAATCGGGGTGTTTG
n267863:4773558	4.27985	3.10156	2.22983	2.14282	3.12208	4773558	504	NONMMUT065736	1976	| AK054109 | mRNAlike lncRNA | Mus musculus | Mouse noncoding transcript | FANTOM3 | E230019P22 | http://fantom3.gsc.riken.jp/db/annotate/main.cgi?masterid=E230019P22 | -1.2448300 | -0.3596731	NOCODE4.0		chr8	58602604	58604594	-	CTGCTGGGGCGTTCTTTTGAATTTACACAGGCCTTGTGCATTTAGCTACAGGTGCTATGAGTTCATTTATACATTTATACATATATACGTGTGTGTGTGTGTGTGTGTGTGTGTGTGTGTCCAGAAAATAGATTGCTTGTTGCCATCTATCATCTCTATGTCTTTAATCTGCTTTCTTTTCTGCAAAACTCCCCGTGACTAGGTGGTAGGGCTGTGATACACATATCCAATTTAGTGATAATCACACTGCATGTTCTTGCTGTCTGAACTCTTAGTGATGTTGTCTGCGTTAATTGCCATCTACTTCAAAAGAACCTTCTCTAATAAAAGTCACATACAATTCGTCTGTGGGTAAAGCAATAAGTCATCACATGGCTGTTTTAAAATTATCTTTCTTTA…
n267939:4354448	2.78307	4.96738	3.68472	5.45205	4.4964	4354448	231	NONMMUT043742	897	| AK053990 | mRNAlike lncRNA | Mus musculus | Mouse noncoding transcript | FANTOM3 | E230011B21 | http://fantom3.gsc.riken.jp/db/annotate/main.cgi?masterid=E230011B21 | 0.4208600 | -0.3204950	NOCODE4.0		chr3	87249308	87250205	-	GGAAGCTTCTCTCACTAATTTAGGCAGGAAGGAGGCCTGGAGGCTGAGAAGCTGGGAAGTCATCCAGGAACTGGAATTCCTATCGGTTACCACCCCACACCAGCCAAACAAGTAGGTGAGTAAGCTATAGAGGCGGGCTGCAACAGGGCCTAGGGTACTCACAACCCTTCAAGCAAATCAAGAGTAAAGCAGCTAGTCTACAAATATCGCACAAGATATCGCCTATGGATC
n268066:5083846	6.03703	5.10261	4.20949	4.01747	4.6721	5083846	512	n268066	1303	| AK087482 | mRNAlike lncRNA | Mus musculus | Mouse noncoding transcript | FANTOM3 | E130304M04 | http://fantom3.gsc.riken.jp/db/annotate/main.cgi?masterid=E130304M04 | 1.1512600 | -0.2510009	NOCODE3.0		chr8	4166566	4186880	+	ATGAGAAGTCCTTGTGCCTGTTTGCTTTGTGCTCTGATGTAATGGTGTGTATACCTATGACCCCTATAATCAGGACATGAGGCAAGATAAGGGCCAGTTTGGACTGCATAGTGAAACTTTGTGTCAAAAAGTTTGCTTACAAAGAATGTGGGGGCTGGGAAAACACCTCCCTGTGCAGTGCTTGCCGCACAAACTTGAAGACCTAAGGTCCATCCCCAGTACCTATATATATAAAGCTGAGCATGCTGGCACATGCTTATAATCCCAGCACTATGGAGGCAGAGACAGACAGTTCCCTGGAGCACCTAGCCAGTCAGCTTAGCCCTGTGGGTAAGCCACAGCCTAGTAAAGAGACCCTGCCTCAAAATATAAGTGGATAGGCCAGCAAGATAGCTCAGC…
n268068:4551654	5.61508	6.04328	5.60826	3.54923	4.95062	4551654	159	NONMMUT053544	450	| AK087483 | mRNAlike lncRNA | Mus musculus | Mouse noncoding transcript | FANTOM3 | E130304P04 | http://fantom3.gsc.riken.jp/db/annotate/main.cgi?masterid=E130304P04 | -1.2350200 | -0.2544088	NOCODE4.0		chr5	106557738	106574718	-	GCACAGTGGTGCTCCGTGATTTACGGGGGCAATTAGTCACCACCCCACAGCGCTGCTGAGGACGGCCTGGCAGCAGACACATCAGGCCCACGAGGAGGAAGAGGCTCTGCACTAAGCTCCAGATGACTTTTCAAACAAGAGCAAGTCCGTGAGCACATG
n268228:5538785	4.44966	2.42735	2.25101	2.39621	1.95196	5538785	156	NONMMUT021904	3261	| AK053534 | mRNAlike lncRNA | Mus musculus | Mouse noncoding transcript | FANTOM3 | E130106I15 | http://fantom3.gsc.riken.jp/db/annotate/main.cgi?masterid=E130106I15 | -0.5062050 | -0.3859359	NOCODE4.0		chr14	93476656	93479916	-	TCAGGCCACGGTAATGAGTTAACACTGAAGGACAAAGTAGAAAGAGTAGATATTTTGGAGAGACTAGCCTCCGCTACCGTCACTGTTCTCATTCATCAATGCCAGTCGGTAAAGAAGAAAGCAGTAACTCTTGATGACCATCTCTGTTTATTAGTG
n268242:4829856	4.59875	2.545	2.436	2.51887	3.25858	4829856	124	NONMMUT046725	1691	| AK053518 | mRNAlike lncRNA | Mus musculus | Mouse noncoding transcript | FANTOM3 | E130104L02 | http://fantom3.gsc.riken.jp/db/annotate/main.cgi?masterid=E130104L02 | -1.1233500 | -0.4090365	NOCODE4.0		chr4	36660595	36662286	-	TAGCTCACTGCAATTGGGGCCACTCCAGGGTATATGGTCCTGGGTTACATAAGAAGCAAGCTGCACAGCTCTTGGAAAGCTAAACTAGTAAGCAGATTTCGGCCCTGTATTAATTCAGTGATGA
n268259:4756418	4.28946	2.19559	2.42193	2.03305	2.51309	4756418	200	NONMMUT027268	4382	| AK053492 | mRNAlike lncRNA | Mus musculus | Mouse noncoding transcript | FANTOM3 | E130102I04 | http://fantom3.gsc.riken.jp/db/annotate/main.cgi?masterid=E130102I04 | 0.1370210 | -0.3740340	NOCODE4.0		chr16	74997908	75002289	-	TTTGGCACAGTACTAGATAACCCTAAAATAAGGGAAATACAATGTTATTATTTTTACAAATTCTTGGATTTCAGCAGAGGCATATGACAGAGTTCAGATCTATTTTGAACAAATTGTTATTTCTTACTCTGTGTGTACATGGCATTAAGTTATAAAATTGCTCCTTTTATATCAGCTCCTGAGAGGAGTGTTCTACTTTA
n268259:5110423	4.94271	3.99079	2.81769	1.87151	3.45128	5110423	217	NONMMUT027268	4382	| AK053492 | mRNAlike lncRNA | Mus musculus | Mouse noncoding transcript | FANTOM3 | E130102I04 | http://fantom3.gsc.riken.jp/db/annotate/main.cgi?masterid=E130102I04 | 0.1370210 | -0.3740340	NOCODE4.0		chr16	74997908	75002289	-	CGGCTGACTATCTCATGAGGCTTTATTGGCCACAAGAGCTTTATTAGGAATTTTACCAGGGGCCACTCACATGTTTGGCTTAGAATGTGCGTGTACTGATTGTACTGTGGCTAAATAATCAGATAAATTTAATAAAGAATTATTGCCATTGAAGAGACCGCATTTTGCATTGGCTTCGGTGTGATTGCCTTATCCCTCAGTTATGTCCCTCAGATGC
n268263:4342471	5.09357	3.66238	2.87911	2.75855	3.51675	4342471	148	NONMMUT027269	393	| AK021366 | mRNAlike lncRNA | Mus musculus | Mouse noncoding transcript | FANTOM3 | E130102B10 | http://fantom3.gsc.riken.jp/db/annotate/main.cgi?masterid=E130102B10 | -1.3061300 | -0.3843668	NOCODE4.0		chr16	75010698	75011090	-	GAGTTTCTGGTAATGCGGCTCTTCCTTGAAAAGCCCTGATCCTCCATAGATCCTGAGTTTGGTTCCTAGCACCTAACAGAGAGGGTTCCAGCAAAGGCTTGACATCCTCTTCTGACCTCTGTAGGGACCGACAGTACATTCATCATTA
n268297:4362355	2.00085	3.48853	3.12855	4.84706	3.96592	4362355	634	NONMMUT016776	2645	| AK053459 | mRNAlike lncRNA | Mus musculus | Mouse noncoding transcript | FANTOM3 | E130019J23 | http://fantom3.gsc.riken.jp/db/annotate/main.cgi?masterid=E130019J23 | -1.2823500 | -0.2902968	NOCODE4.0		chr13	28445354	28447991	-	TGCTCCTGTCCTTAAGTTGGCTTTCTTCAGAATTCAAAGTACCGTGCTCTCAGTTCATTGTGGTTCTTTGTGCCACAGTGTCTCCTGGATTTCTGCTCGCAGCTCCTCTGTATATACTCAGTGTCTTATCTTCTATCTTCCTGATGCTACCAGATGAGACTGCAGGTTAAGCCCCACACCTGCTTGCTGAGTTCCAGAAGCAATCCATGGGCATCAGTTATTTATTTTCCTGCACGTGTCCAGTCTTCATCGTGCAAGGACAGTGCTGGCTGATGGACACCTGCTTCTCTAAGCTTTATCTTTGTAAAAGAATTTTCTTTTGTATCTCATTGTTAAAAACATTGTACTTTCAAGCTATACATGTATATATTGTATGTTGAGTGTATTCATCCCATGACA…
n268339:4556881	4.3341	2.39906	2.82915	2.03224	3.38277	4556881	290	NONMMUT020416	2513	| AK053398 | mRNAlike lncRNA | Mus musculus | Mouse noncoding transcript | FANTOM3 | E130014B15 | http://fantom3.gsc.riken.jp/db/annotate/main.cgi?masterid=E130014B15 | -1.0150900 | -0.4340087	NOCODE4.0		chr14	39150067	39152579	-	TTATGTATAGAGAGGCAATCTTTGCAAATAATATGTTCAATTTTCTGGCTTCAGCTTTAGATTAAGTAATGATTGAAGATAATTGGAACCTTTTTAAATTCAATGTGACTGATACCATAGGCTCACAACTGAATTCTGGTTTTGCTGTAGCCAAACATTTTGAATTAGGTAACTTTATGAGCCATAGAATGGTCAGTAAAATTAGAATAATAAAAGTAGATTATTTTGTTTAATATTATGAGACAACAGTTCTCCCTTTTCCATCTTTTAGGCCTATGCTACAACCATCA
n268415:4696526	5.66569	4.15546	4.42893	1.96498	4.80066	4696526	240	NONMMUT042285	1214	| AK053289 | mRNAlike lncRNA | Mus musculus | Mouse noncoding transcript | FANTOM3 | E130007N09 | http://fantom3.gsc.riken.jp/db/annotate/main.cgi?masterid=E130007N09 | -1.1959900 | -0.3524719	NOCODE4.0		chr3	25681556	25682770	-	CCTTGTTGACCAGAGATACCCTTGACATTAGTTTGCTTATAGTGCCCAATACCGTCAGTCAAGTTGTGACTCCCTAGAAAGAATGAAAGAATATCCATATTTTGAAAGTATCTAAGCAATCGCAGAACAAGAGGCATAATAGAGTTCCATTGTTGGCAAAAATCCTTGGAGCCTCTCATCAATTTTTAGTCTCTGTAACTGTTGTAAAGGTAAGGCTCCACAGGCTTTCTGAGGTGAATG
n268430:4626056	3.99141	2.52352	2.34196	1.77793	3.72998	4626056	360	NONMMUT019036	2291	| AK087394 | mRNAlike lncRNA | Mus musculus | Mouse noncoding transcript | FANTOM3 | E130006F02 | http://fantom3.gsc.riken.jp/db/annotate/main.cgi?masterid=E130006F02 | -1.0971600 | -0.2912003	NOCODE4.0		chr13	105042452	105044734	-	TGATACCGAGTGAGACGCAGAAACAAAAACAAATCTTTTAAATCTCCTTTGGTAAATGCAAGAACTAGGTTTGTTAGACAATTAGACTATGATGAACTGTTACAAATGGAAGGTGGAAGAAACCAGACAACACAAGAAAGTAGAAGGTCAAAGGTCAAGGTCACGAGTTCATTAAAGGACATTAAACTTCAAGTGCAATGTCTTTTTGTGTGTGTGTGTGGGGGGGGCTTTTTGAGAAAGGGTTTCTCTGTGTAGCCCTGACTGTCCTGCAATTCACTTTGTAGACCCGGCTGACCTCAAACTCAGAAATCCGCCTGTCTAGGCGTGCGCCTCCAGTCCCAGCAAGTGCAATGTCTTATG
n268443:4475064	2.59048	2.84715	2.81317	4.78307	2.53429	4475064	478	NONMMUT032370	1332	| AK087386 | mRNAlike lncRNA | Mus musculus | Mouse noncoding transcript | FANTOM3 | E130003I03 | http://fantom3.gsc.riken.jp/db/annotate/main.cgi?masterid=E130003I03 | -0.9049290 | -0.2835428	NOCODE4.0		chr18	53418198	53419529	+	TCTGGGCGTGCTGCATCAAGTTTCTCCAGATGTCTACCTTTCCGCTTTTGGGGAGTCGTAAGATTCAATCTTCTGGGAAAACTTGAGGTCGAGGGATTTTGTGCGGGTGCTGACTCCACGGCCTTAGCCACAGTTTTCTGGGAAGCCCTTACACAGGCCCTGAACAAGGACCAGATAAGAGTTCTGCCCTGCGAAAACAAAAGTACTCAAACTGGGCTGCGAGGTGTAGCTGTAGGATGATTTTTTTTCAACCATCTTACGGATTAGGAAAATTGATGACATGGAGAAATTCTCATTGCATTTTTTAAATGGAAACAAACAAACAAACAAAAACCCGAAACCCTCATGTGCAAAACCACGTTGAAAGTCTGAACTTACCTCTGAAAATATAAAAACAGC…
n268455:5298235	6.12257	3.91288	3.80605	2.26418	3.91288	5298235	156	NONMMUT014775	3285	| AK053256 | mRNAlike lncRNA | Mus musculus | Mouse noncoding transcript | FANTOM3 | E130002L11 | http://fantom3.gsc.riken.jp/db/annotate/main.cgi?masterid=E130002L11 | 0.0356261 | -0.2747210	NOCODE4.0		chr12	78956931	78960215	-	AGTTGTAGCTTCTATGGCACTGCTGCCAGGCACCAATGGCCACATGTTTTCATTCTCTTCCATTTCAGATGGGCACCATCCTGTCCCTGTTTATGGAGGAGGACTGTTGATACTCAGCCTATAGCCCTGGCTTTCCAGGACCTTACCATGTAGACC
n268464:4699268	5.11337	4.10397	3.0754	2.97821	3.94926	4699268	580	NONMMUT027166	3325	| AK087370 | mRNAlike lncRNA | Mus musculus | Mouse noncoding transcript | FANTOM3 | E130001F17 | http://fantom3.gsc.riken.jp/db/annotate/main.cgi?masterid=E130001F17 | 0.9018880 | -0.3731613	NOCODE4.0		chr16	67475352	67478677	-	TCAGTTGGCATTCTAGAGCCGTTTCTTTAGTGAAGAAACAGAAAGGTCAAAAACTTCTGGTGACAGGAGAAAAGGTAATCCTTTTGTAAGTTCTAAAAGATGACCCTTACAACCACAAATTTCAATTAAGAGAAAGGTTAGGGGGAGGTTGCTGTCTTGAAGTCTTCAGTGACATGATGCCAGGAGTCATATTTCAGGATGTTTTATATAAATAGGAAATGTTTTCTATTTAATTGTAGCTTCTTTACATCTGGAAGACTTGTCATATTGTAAACAAACCTTATATGACATACAGGCATATCGAAGATATTCTATTTATATATCTCCAAGCATACAGAGTTATACTGACTTAAAAGTTAAATGAGCTTTTTATACATTTTATGGAATTGTCTGGTACAG…
n268645:5608369	5.50662	4.52227	3.33642	3.20624	4.29653	5608369	679	NONMMUT009036	2087	| AK087171 | mRNAlike lncRNA | Mus musculus | Mouse noncoding transcript | FANTOM3 | E030031J08 | http://fantom3.gsc.riken.jp/db/annotate/main.cgi?masterid=E030031J08 | -1.1140200 | -0.3462382	NOCODE4.0		chr11	29215910	29217970	-	GTTAAGTTACCCTCTGCAGTGTACAATTCAGTGTTCCTAGTGTCACAACATAGTGTGCGCACACACACACACAAACTGAATGTTTTAAAAATTTTATGTATGTGAATAAATTTTATGTATGTGAATACATTGTGGCTCTCTTCAGACACACTAGACAGGGCATCGGATCCCATTACAGGGAATTGAACTCAGGACCTCTGGAAGAACAGTCAGTGCTCTTAACCACTGAGCCATCTCTCCAGCCCCACAACATTATATGTTATCCCTCCTAATTCTGTAACATCTTCATCTTCCTTCCCAGAAAAGTCCCTAACATTTCTTGCCCCATATTTCCCTGCCTTTCCCCATAACTCCCCCTTTCTAGGGTACAGGCAAGCACTGATCTACTTGCTGTCCACT…
n268730:4971205	2.33624	2.45642	3.0241	6.10908	5.23138	4971205	92	NONMMUT054792	1652	| AK087068 | mRNAlike lncRNA | Mus musculus | Mouse noncoding transcript | FANTOM3 | E030024M20 | http://fantom3.gsc.riken.jp/db/annotate/main.cgi?masterid=E030024M20 | -0.9027680 | -0.3069223	NOCODE4.0		chr5	134725602	134729106	-	CTCTCCCAAAGTTGAGAGGACACTCTGGGGCTAGATATGCAGAAACCTATCCATACCTGCCCAATCTCTCATGTCTCTTGTTGCAAGGTTTG
n268739:5149795	1.73608	3.58646	3.36235	4.281	2.4182	5149795	239	NONMMUT014303	2802	| AK142967 | mRNAlike lncRNA | Mus musculus | Mouse noncoding transcript | FANTOM3 | E030022O15 | http://fantom3.gsc.riken.jp/db/annotate/main.cgi?masterid=E030022O15 | -1.2471800 | -0.4012648	NOCODE4.0		chr12	56512587	56512646	-	TGCCTCTGCGTTCCAGTTGGTTAAAGCACTCAATGTACAGGTGGTGTTGATATCTAAATAAGCATCTACAGACGTCACAGATTCCAAGTAGGCTTTCAAGTTGTCTTCCTGGTAAGACATGGGGGTGGCGGTACGTTGTGTACTCTCAGCACTTGGGAGGCTGAGGAAGAAGGATCAGCTGTTTAAGGTCAACCTTGGCAACATGATGAGTTCAAGGCCCGAGCTACAAGAGACTTGTC
n268764:4802083	3.18048	4.73458	5.1344	5.18489	3.59238	4802083	852	NONMMUT008131	2117	| AK087033 | mRNAlike lncRNA | Mus musculus | Mouse noncoding transcript | FANTOM3 | E030022B18 | http://fantom3.gsc.riken.jp/db/annotate/main.cgi?masterid=E030022B18 | -0.9295660 | -0.2517593	NOCODE4.0		chr10	128237591	128239706	+	CCCAGTCCCAGTGAGAGCTATTGTTTTGTTGGGTTTTTTGTTTTTCTCAAAGATTTCTTTCTTTTTTTTTTTCTTTTTAAGATTTATTTACTTATTTTATTTCTATGAGTACACTGTGTAGCTGTACAGATGGTTGTGAACCTTCATCTGGTTGTTGAGAACTGAATTTACAGTTTAAATTCTGCTCGCTCAATCCTGCTCACTCCTGCCCAAAGATTTATTTATTATTATAAATAAGTACACTGTAGCTGTCTTCAGACACACCAGAAGAGGGCATTGGATCCCATTACAGATGGTTGTGAGCCACCATGTGGTTGCTGGGATTCAAACTCAGGGCCTTTGGAAGAACAGTCAGTGCTTTTAACCACTGAGCCATCTCTCCAGCCCCTGAGAGCTATT…
n268802:4373708	4.95369	3.58765	2.77479	2.70865	3.50095	4373708	335	NONMMUT068245	3433	| AK086981 | mRNAlike lncRNA | Mus musculus | Mouse noncoding transcript | FANTOM3 | E030017J04 | http://fantom3.gsc.riken.jp/db/annotate/main.cgi?masterid=E030017J04 | -1.1239300 | -0.2816408	NOCODE4.0		chr9	20596294	20599722	+	GGCAGCAGATGCACGATTCATAGCAGAAGACAGCCGGCAGCAGGCCATGAGTCCCAGGGATCCAACTCAGGCTGTCTGGCTTAGCAGCAAGTTCCCTTTCATCTGAGCCATCTTGGAGTCTCCTCTATGTTTTTATACTTACAAGGTTTGGTTGTTTTGTGGAGTTTTGCTTGGTTGGTGTTTTATTGTTAACATTGTTTGGTTTTTGCTTTCTTTCTTTTTATTGCCAATCAGTAAGCTATATCCCTGGCTCCACATTTTCCCATACAACTTCTCTGATAATATGGTTTTATTGTGTAGTCCCAACTGCCCCGGAGCTCATGTACTCAGATGGA
n268802:5473654	4.76325	3.00039	2.90757	2.47957	3.76649	5473654	170	NONMMUT068245	3433	| AK086981 | mRNAlike lncRNA | Mus musculus | Mouse noncoding transcript | FANTOM3 | E030017J04 | http://fantom3.gsc.riken.jp/db/annotate/main.cgi?masterid=E030017J04 | -1.1239300 | -0.2816408	NOCODE4.0		chr9	20596294	20599722	+	GGTTGACCAAATATCTGACTCTGTAGCATACAGTGTAGTGTCCTTTTGGTAAATTCCCAAGAGGGGTAAGGCTGAGTCTTGAGGTGGATTTATTCCCAGCTTCCTGAGGAACTGACACCAATTTCCATGTGGCTGTACAAGTTTGCATGTGACGGTGTTTTAAGGATCTC
n268826:4877634	3.05223	3.65141	4.43017	5.60088	5.71584	4877634	98	NONMMUT017930	506	| AK086954 | mRNAlike lncRNA | Mus musculus | Mouse noncoding transcript | FANTOM3 | E030015L16 | http://fantom3.gsc.riken.jp/db/annotate/main.cgi?masterid=E030015L16 | -0.2307310 | -0.2093244	NOCODE4.0		chr13	63272998	63295168	+	TTCGTTGTATTTCTGCCTCGGCCGGCCGTGATTATTCCTCCTCGCAAAGGTCTGAATTAAGAAGCTAAGCTGGAAATGAGCGGGGCAAGTGGTTCTCA
n268927:4557496	1.84837	2.30161	2.64808	4.36831	3.22853	4557496	216	NONMMUT068518	1855	| AK086848 | mRNAlike lncRNA | Mus musculus | Mouse noncoding transcript | FANTOM3 | E030004I23 | http://fantom3.gsc.riken.jp/db/annotate/main.cgi?masterid=E030004I23 | -0.9411360 | -0.2831655	NOCODE4.0		chr11	90034345	90034386	-	TCAGTGGGCCCTTTTATTGATGGTGGGCAGGTGTAAAAAAAATGAGGTTTTGCCTCTTTAAATAAAACACTCTCGGATGTATTAGGAGAAACCTAGTGGATCTATTTTCTGAACAGTGAAGCAAGAAGGTCTTTGGTAACAGCCCCGTTAAATAAGATTTAAAATTTCAATGTCTTCTTTAGTTTGAGGTTGAGCACTAAGTTGGCATTGGTTTTA
n268946:5532575	1.48083	3.36102	3.48388	3.95498	4.07831	5532575	480	NONMMUT053376	2351	| AK086825 | mRNAlike lncRNA | Mus musculus | Mouse noncoding transcript | FANTOM3 | E030003E06 | http://fantom3.gsc.riken.jp/db/annotate/main.cgi?masterid=E030003E06 | -0.9103700 | -0.3280575	NOCODE4.0		chr5	102561640	102563989	+	TGGGCGACTGAATCTTAACTATTTCTTTGGTCTCTGCCAGTTGGCACTATAATTTTGTCTTAGCAGAATTCCGTTCCCTGTAGCTTAACTAGAAGGGAGCCTGAATTTCAGTTGTTCCAAATCTATTATATAATAGAAGAGTCTTTGAAGTTTACTTCCACATAGAGGATTCTCTTGATTAATAAGGCTGAGACCTATTTATATTTGCATAACAGCTAACACTAAATTGTGGTTTGGGTCAGAGTTTCCAATCTAGGTCCCCTGTTGAAAGGGCTGAAGAAAGAAAGGGCCACTATCTAAGATGCTTCTTTTTCTCAAAAATGGAAGGTTGCTGACGTACCTCTCAGAACTTAAAAACAAATTTAAAATTATAAAACAAACAAGCTGGTAGGGGGCACA…
n268969:4393918	2.91639	4.61247	4.66675	5.9645	2.13822	4393918	307	NONMMUT011033	2045	| AK086786 | mRNAlike lncRNA | Mus musculus | Mouse noncoding transcript | FANTOM3 | E030001F16 | http://fantom3.gsc.riken.jp/db/annotate/main.cgi?masterid=E030001F16 | -1.1327100 | -0.3406255	NOCODE4.0		chr11	80633709	80635752	-	TAACCCGGATGTGACTAAGTAACTGAGTGTGGGGGTGCAAAACCTTTGGTGACACTAAAAGGTTTCTGAACATGCAGTGACCAAAAATGAACTCAGAATCACTCTGAGGTGTTTGAGGCAAGGCTCACTCATGTTACATTGTAAACGTTACTGCAGCTTTGACTCAGAACACCTAACATGCCCACATTGCGGTATCCAAGCTATTCCAGCACCAGCCAATGTGCAGCAATACCTTAGGCCAGATTTGAAATCACCGTGTGCTGTGAATTGTAGTCAGTGTCACAGTGCATTTTGCTGCCCTTACAGA
n269085:4712826	4.51746	2.66231	2.18002	1.90525	2.33622	4712826	411	NONMMUT020424	1546	| AK086651 | mRNAlike lncRNA | Mus musculus | Mouse noncoding transcript | FANTOM3 | D930043P04 | http://fantom3.gsc.riken.jp/db/annotate/main.cgi?masterid=D930043P04 | -1.2242800 | -0.3831139	NOCODE4.0		chr14	39383881	39385425	-	TTGGCAAAGTTACATGGATCTCACCACTGGCTAAAGTGCTCCTTCTACATGCTCACTGGTGTTTTCCTTAATGGCCTATAATTTCAACTCCTTTAGCTCTCTTTGCAGAATGCTATAATGAAGGAGGTGTGACTTGGGTTCAGAAATGTGATGGTAAATTATCCATCTATGAATTAACATGTATAATTTAAACACACTTCATGAATAATGATGATTTTCAAGTTTGACTTTATCATCTAAGTGAAAGGTAAGGTCTCTTATTTCCCACTCTGTACATTTCATATAATAAAGATTAAAAATGTATGCTCTGGTTTTGTGGAAACAGTTTTACAGCTTACTGAAAGGTATTTCTGGGAAGCCCATTCTGTACAATCAAGTAGCAGAGGAGGTGATGACATC…
n269136:5354719	2.91682	4.621	4.02311	5.05002	3.12657	5354719	259	NONMMUT037648	4277	| AK053066 | mRNAlike lncRNA | Mus musculus | Mouse noncoding transcript | FANTOM3 | D930039J15 | http://fantom3.gsc.riken.jp/db/annotate/main.cgi?masterid=D930039J15 | -1.1698600 | -0.3367958	NOCODE4.0		chr2	66338900	66343174	-	CGGCACGTTATAGAGTGTGCTAATCATAGCAGGGTCCATAGAGCTATGCATCAAAAGGCTAAAACATGGGAGTTTTAAGGAATAGATGCATAAACATATTAAAAGCTGTGCTGGGGACAGCATTCGGTGGTGGATCCCTTGTATAACACTCTGGGTTGGTTATAGATTATACACGCATGTGCACACACACCCTGAGCTGGGAACATGACCCTATGGTAAAACACTTGCTTAGCATGCAGGAGGCCTTAATTGCATTCCC
n269144:5354327	7.55997	6.99758	6.21793	5.15545	6.56462	5354327	609	NONMMUT069566	3296	| AK142890 | mRNAlike lncRNA | Mus musculus | Mouse noncoding transcript | FANTOM3 | D930038P19 | http://fantom3.gsc.riken.jp/db/annotate/main.cgi?masterid=D930038P19 | -0.4222390 | -0.3931304	NOCODE4.0		chr9	64708671	64711967	-	CTTGCCCTTTGTGCCACGGGATGTACTTGAGTACACATTCTTGGAAAAACAGGAGCCTAATACTGGTGTGAATGGGATTTTAAAATATTTAACATGAGTTAAGGAGATCCCATTTGTTATTTTAAAAATAACACTTTGGTTCCTTTTTCTAACATGTATTGTGGTAATTTTCATTCTTCCAGCTGTTTAAAGTAACCATACCAAATGAGGGTTTAGTATTGTCTTAAACATAAAATGTATAGATTTTCAGTTTGCAACACAACAGTAGGCATTCTTGTAATGTTAGTTTGAGAATCCATTTTATTTTGTATAAGGTACATCCTCTGCACAGTGAACAAATATATTACAAATCTGTGGTTTAAAAAAGTATTGCCATTTCATAGTCTCTCACACTATTGT…
n269177:4791057	2.21315	3.02096	2.84077	4.52923	3.2059	4791057	517	NONMMUT028247	2671	| AK142878 | mRNAlike lncRNA | Mus musculus | Mouse noncoding transcript | FANTOM3 | D930036N23 | http://fantom3.gsc.riken.jp/db/annotate/main.cgi?masterid=D930036N23 | -0.2647110 | -0.3347414	NOCODE4.0		chr17	12772983	12775653	+	TTGGCTGAAAATGGTGCTAAATCCCGAGCTTATAAAGCATAATCCTTTCCTCAAGCTGATCAGGTTCGGATGATAGTTCATTTAGTATAAATTTGGGGGGGGGGTGTCTTCTAGCCATTCTTAGAGGCTCTAGTTCTTTAAGAAAGGTGCATTTAATTAGCCATAAAGTGGAAATGCTGGCAGATGACAGCAGTTCACACTGAGGCTCACTCTGAGTCAAAGCCACATTGATACCATCCCTGCTCTAGCCCCTTGGCCTGGGTCCTTTTGTTCTTGTCATTTATGAAGCATGAGCATCTCAGACTTGAAGAAGCACAGTCAGAAAACAGTTCTCTGCAGTTCATCTGTTGCCCCTTCTCAGAGAGACCCGGAAGTTCTTTAGCTGGATCTACACACACA…
n269256:5309914	4.43876	3.78743	2.61338	2.15784	2.77398	5309914	275	NONMMUT051309	555	| AK086461 | mRNAlike lncRNA | Mus musculus | Mouse noncoding transcript | FANTOM3 | D930030J10 | http://fantom3.gsc.riken.jp/db/annotate/main.cgi?masterid=D930030J10 | -1.1000900 | -0.2661424	NOCODE4.0		chr5	16297790	16298345	+	CGATCGATCCTCATGTACTGCAAAGCTAAACTCTTCTTCGTGCCCCTGGACCACTTGCTCCCCATGGTCCAAATCCAGAACTCCACACATGTTCTGTGTGCCTGGGATATTCTTTTCCATGCTCGTCACTAACATTTCTTTGAAATATATGCCCCACAAAATGTCATTTCTCAAGAGAATTTCTTCCACTGTCCACTTTCCAAATTAAAAACTCTTCTTGCAGCGTTGTGTCTCAGAACATGATAGTCTGTGCTTCAGTAAGCTAGGCACCATTA
n269298:4469492	5.6966	3.81639	3.76061	2.52799	4.46677	4469492	490	NONMMUT027445	2458	| AK142843 | mRNAlike lncRNA | Mus musculus | Mouse noncoding transcript | FANTOM3 | D930027I24 | http://fantom3.gsc.riken.jp/db/annotate/main.cgi?masterid=D930027I24 | -1.5906100 | -0.3784932	NOCODE4.0		chr16	81225872	81228330	+	AGAACCCGTGGAGGTCTTGCTCATGTTGCCTCAGTATCCGTGAGTTCATACCTGTCCCAGTCCTGTTGTGGAAGTCACTAACACCTCTGGCTATTACATGGTCTTATCTCTTCTGCAAGGTAAATTCCTGAAATTTGAAGGGAGAGGTTTGATGGAAACACTCTCTTTGAGCTGTCCATTCCAAAGTCTCCTACTCTCTGCCCATTGTCCAGTTGTGTGGTTCTTTGTTACTCCCCGTCTTTTAAAAGAAGCTTCTCTGATGAGGGACGAGGCAGGCACTAAGTGAAACCCATTGAAATAAGACAATATGTCATTAGGAGTCATTTTATTCCTATGATTTTTTTTAAATCAAAATAATAGGAGTAGGTACCCTTAGACTCATGACTGATGTTAGGTCCT…
n269298:5399090	5.99554	4.23884	3.97636	3.91868	4.06604	5399090	512	NONMMUT027445	2458	| AK142843 | mRNAlike lncRNA | Mus musculus | Mouse noncoding transcript | FANTOM3 | D930027I24 | http://fantom3.gsc.riken.jp/db/annotate/main.cgi?masterid=D930027I24 | -1.5906100 | -0.3784932	NOCODE4.0		chr16	81225872	81228330	+	TGTCCAAAAGTAGGATAGCTGCATCATGGAGGATATTGATTGTCCTTATTTGAAGAAACTGCACAGTAATTTTCACAGTGTATATACCATTTAATTCTTTTCAAACAATGAATACATACCCACACAACCCCTACATCCTTGCCAACATCTGCTGTCATTTGTTTTATTAAACTTGATCATTCCTAGTGGGTAGTTTGAAACTTCTAAGTAGTTTTGATTTGCATTTTTTTTCTGTCAGATAAGGACACTGAACATTTCTTTAAAGTGTTTTCCAGATATTTGTGTTTAGTTTCTCATTACTACTTTAGAAATTAACATAAATTTATTGGTTTATAAAACATGCATTTATTTTTGCACTTCCTGGAGGTCAATTATCTTGATGGTTTAAAATCAGCATGT…
n269331:5286202	1.6895	2.36636	2.64209	5.15633	2.3805	5286202	347	NONMMUT022745	3601	| AK086388 | mRNAlike lncRNA | Mus musculus | Mouse noncoding transcript | FANTOM3 | D930025A01 | http://fantom3.gsc.riken.jp/db/annotate/main.cgi?masterid=D930025A01 | -0.8956660 | -0.3490295	NOCODE4.0		chr15	10584219	10587688	-	CCCTGGGATTGGAGTCACATAGTCAGTTATGATAACAGCATGTGAGTGCTAGGAATTGAACCCAGGTTCCTCTGGTAGAGCAGCCACTACCCTTAACCTCTGAACCATTAGTCCAGCCAAAATTAAAATTCTTAAAAACTGAAGGTGGTACAATTTACCTACTTCTGGTTGGTAACACTCATCTCCCTTATTCTGGAGTATAGATTATTTATAAAATGGCAGCTGTATTTTTTTTTTTTTTTACGGATTCTCTACATGAAATACAGTATCCTGTATTGGACACTAGGATAGAGACAGATGTGGTAGTGCACACACTGGAAATATCCAGCTAAGGAAGCGGAAGCACA
n269403:4467742	4.63276	2.55392	3.18845	2.60785	2.96215	4467742	326	NONMMUT009089	1390	| AK053026 | mRNAlike lncRNA | Mus musculus | Mouse noncoding transcript | FANTOM3 | D930020O11 | http://fantom3.gsc.riken.jp/db/annotate/main.cgi?masterid=D930020O11 | -1.5906100 | -0.3023961	NOCODE4.0		chr11	30003129	30004519	-	CACAAGTGTTCTATAGGGCATACCATGCAATGCGTTACAGTAGTGTCTTTAACAGCCAATAATTCAAATGCCCATCAACAGGAACACTTAGACTCAAAACTAACAAGCTGCAAGTTCAGGCAATATAGGTGGATGCTGACCTCTGACCTAATTCAAGACAACAAAAATGTGTTATGTTCCTTCCCTACAGTAAACTCTCAGTGACATCAGTGCTTAGGACAGGCTCAAAGAAAAACCAAAACCAAAACCCAATCCAGGTAGCTTCTTGCAAGATTTCCTTTAATAACCCCCATAATTTATAGCTCGTGACTTCTACTAAGACTCTT
n269444:5222858	5.47217	3.70317	3.12061	2.77491	3.90141	5222858	391	NONMMUT026642	2711	| AK086274 | mRNAlike lncRNA | Mus musculus | Mouse noncoding transcript | FANTOM3 | D930017N02 | http://fantom3.gsc.riken.jp/db/annotate/main.cgi?masterid=D930017N02 | -1.2009700 | -0.3591044	NOCODE4.0		chr16	41669070	41671782	+	ACAGTCTCTGTAGTTTCGTTTGGAAGAGCAGTTTCTTCAGACCTGAATGTGCAGCCAGCTCTTAGCTGTGGGCTTCCTTTGTCATCTCAAACCCATAATTACACCTGTGCTCCTCTACTTCTCCTGTGTCTTACATAGTTCTCTGTGATTTTAAACATCTGGTTTTTTTTGTTTGTTTGTTTTTGTTTTTATTCCTGTTTCCCTCCATAAACTCTTAACTCCTTCAGCATCCAGCTTGTCTCTTCTCCCTAGAATGTGGAACAGAGAAGAAAGTAGTAGCTCAATGCCTGCTGAACTGCATAGAACATAGTCCACATTAGCAGATAAAGTTGAGCTAGGACCACCAAACATGCCTATTATTTACTAGGATGAGACTCACTAGCAGGCTATT
n269452:5451086	5.02191	4.45996	3.38126	2.6739	4.52463	5451086	153	n269452	4185	| AK053020 | mRNAlike lncRNA | Mus musculus | Mouse noncoding transcript | FANTOM3 | D930017F01 | http://fantom3.gsc.riken.jp/db/annotate/main.cgi?masterid=D930017F01 | 0.9501990 | -0.4326010	NOCODE3.0		chr3	55964052	55968236	-	CCTCAGGGTCCTATGCATCGTAAGCTCTCTGAACTTGCAAAACAGTAGGAGGTTCTCAATAACATCTCATTTATCAATGTTGATTCTTACTTCAAAGACTGTCTAAGTGCTAGTCTGCAGGATTGAGTCTGGCATGAGGCATATCACACTGGA
n269487:4831380	1.65568	2.06866	2.67194	3.85397	1.60182	4831380	237	NONMMUT047797	2285	| AK086234 | mRNAlike lncRNA | Mus musculus | Mouse noncoding transcript | FANTOM3 | D930015F04 | http://fantom3.gsc.riken.jp/db/annotate/main.cgi?masterid=D930015F04 | -1.2252300 | -0.4145011	NOCODE4.0		chr4	77678480	77680763	-	TATCAAGACATAGGTCAGAAACTTCTATCTCTCAGCCTCCAGATTAGGATCACTGATGAGTCTTCCAATTCTGGATTGTAGTTCATTCCAGATATTGTCAAGTTGACAACCAGGGATAGCCACTATAGCAGCTGTGATAAAACTGTGAGCTATTTAAATATAGCTTAACTTCATTCTTGCAGAAAGCAATAGCAGATTCTTGAATTATCACACATAGTGCCCAGTATGTAATACTTA
n269509:4485506	4.42895	3.87664	4.06897	2.04536	4.89301	4485506	320	NONMMUT023830	2086	| AK086208 | mRNAlike lncRNA | Mus musculus | Mouse noncoding transcript | FANTOM3 | D930013F18 | http://fantom3.gsc.riken.jp/db/annotate/main.cgi?masterid=D930013F18 | -0.9415570 | -0.2661146	NOCODE4.0		chr15	68256390	68258475	-	CGTGTTCTTAGCCAGGACGTGCTTCAAGTCCAGCCTTCTCTAGTGACCTTCAGAGGGAGCGGCCAATGAGAGAGATGGGCTTTATCACGGGTGACCCTGTCCCATGCAAGTAGTCATTTGCCTTCTGTCTTTGGCCCAGTGCTGTAGGGCATTGTCCTCGTGCGCTTGAACGAAGTGGCTCCAGGCCACTTCCTCCAGGCAGCCCTCAGACTGTCTAGCCAGAAGCTGCTTTAGCTGGTCTCATTGGAAGGGTAGACTTTTCACTTAACCCCTGGTGACTCCCCTTAACCTTAAGCTTGTGACCTCTAGCCTGTGATTGA
n269564:4866795	4.70637	2.23413	2.80345	2.4231	2.73669	4866795	341	NONMMUT044964	1896	| AK086157 | mRNAlike lncRNA | Mus musculus | Mouse noncoding transcript | FANTOM3 | D930008M17 | http://fantom3.gsc.riken.jp/db/annotate/main.cgi?masterid=D930008M17 | -1.5906100 | -0.3908917	NOCODE4.0		chr3	118520431	118522258	+	CAAGTAGCACATGATCTCGGTTATCTAATTACCTGCTTTCCCTGTTGGACTCAATGCTGTGTAAGGAAAGAAAAACGTTAGCTTTCTTACACACCAAAAATATTCCCAGAGCTTGTTAAGATGTTAGGAACATCCCAGTTTCTTAAGAAGTATTTGCTGAAGACATGGATCTCTCAGTGAAAAATAACTGATGGGATTTTACCAGCACTGGAACTGTGAGCATGAGCAATGATATGTCCCCTGCAAGATGAGTTTTTATGGAGCAGATGATGAGTTAAGCAGCATGGAAAAAGATGTGTTTTCAAAAGATAGTGTTGGGCCATGCCATAATGAATCTTAGA
n269564:5335136	6.05305	5.06065	4.73866	2.8419	5.45585	5335136	521	NONMMUT044964	1896	| AK086157 | mRNAlike lncRNA | Mus musculus | Mouse noncoding transcript | FANTOM3 | D930008M17 | http://fantom3.gsc.riken.jp/db/annotate/main.cgi?masterid=D930008M17 | -1.5906100 | -0.3908917	NOCODE4.0		chr3	118520431	118522258	+	CTATCCTGGTAATCTGGCTAAGGCAAATGAGGTTCTTTTATTTCTACCTTAGTTATTAATATCAAATGTCTTATAATGCATCTTACAGCAATGAATCCGTATGAGAGTATATCTAGAGGCATGCATGTGGCTTACCGAATGAATTTAAGGGAAAGAGGCAGCATTGGAAACATCCTAGAAGTAGGTTGATGGGTAATGTCAATAGAGTCTGTATGGGTAAGATAACTGAGAACTCAGGTCAGTATAAAAAATAATTCAGATTGGTGCAAGGGCCTGCCGTCACATTGCTAGATGTCCATAATTTTATGGGGTTCACGTGAGGGAAATACAGCCTCTCCTTGTTCTAATAAGCCATATGAGTTCTTGTGTCTAGTTTCCTTGCTTTTTTTTTTTTTTTTT…
n269583:5094557	4.98018	3.01447	4.07762	2.83376	4.66026	5094557	1048	NONMMUT034186	1911	| AK086143 | mRNAlike lncRNA | Mus musculus | Mouse noncoding transcript | FANTOM3 | D930007P20 | http://fantom3.gsc.riken.jp/db/annotate/main.cgi?masterid=D930007P20 | 0.9110590 | -0.3219047	NOCODE4.0		chr19	22692600	22700307	+	GACCATGCGGTTCAATGTTGTTTCCATATGTGGGTACACAGGCATTGACCAAATCTACCACTTCTTTATTCCCCTGCCTCCTACACCTTTATCATCTTTTTTCAACCACTCTTACACTCAGATCCACTGCTCTCTGGCTTTCACATATGAGGAAAAAGGCGGTACTTGCCTTTTTAAATCTGGAATATTTTCTACAGTTTTTTATTTTATTTATTTTTTTTTTTTACAGTTTGCAATGTTATTTTCTGTGTCTCATCTACTTAGCCTTTTTCTAAATCCTTTATCCTAGCTTTGGAGAGAAAAAGAATGTTTCCTTTAGGTTTCTGTTTTGTTTTCTTGGCCACATTTCCCAGGCTGTTTCCTGCCTGGTCTTGACAGAGATCTGAGAATCCACATCAG…
n269592:5508521	3.71971	4.32834	2.57964	1.71182	3.4347	5508521	494	NONMMUT020400	2108	| AK086133 | mRNAlike lncRNA | Mus musculus | Mouse noncoding transcript | FANTOM3 | D930007J20 | http://fantom3.gsc.riken.jp/db/annotate/main.cgi?masterid=D930007J20 | -0.9182690 | -0.3070385	NOCODE4.0		chr14	38723803	38725911	-	CTTTGGGCACAAGGGTTAACATCTCTCTTATCTGGACCTCACATCTGACTCTGAGATAATTAGCATTTCACCTGAAGTGAAGTCACTGACCATAAAAGAACCATAAAGAAGATACATATTCAAAAGAAAAAACAGCCTCTGACAGACTCTTATGTTACAAGAAGAGGCAGAGAATGATAGATGTCTAAATCCATTCAGTATATGTAAGCATTCACTGAATCAAGCAAAAGGAATTTGTTTTGCTGTTATTGTCCATTGACTTCTTCACTACCAGTTGTTTATCTACTCCAGATCCAATGGGCATAGCCCTCACATCATAAACTATGGTTCTTGAGTTCCTCTTTGCCCTGACATTTACAGGAAATCTGCACATGTCTCAGCAGATAAATAACTTACACA…
n269620:4663520	5.20054	3.96447	3.33932	3.1905	3.64561	4663520	445	NONMMUT022855	1888	| AK086101 | mRNAlike lncRNA | Mus musculus | Mouse noncoding transcript | FANTOM3 | D930005N13 | http://fantom3.gsc.riken.jp/db/annotate/main.cgi?masterid=D930005N13 | -1.2638900 | -0.4108488	NOCODE4.0		chr15	19014421	19016308	+	GCTGCTCTCGATTCTTGTGCTAATACATTGGTGGTACAGCAGTTTTGTCTCGTTCATATTTGCTAAGACAGTGTCTGGAAAAATAAACCTTTCTCTCATTGTTTTTTTGTTGAATGACATATTTGCTCTTGAATTTTATAGGCAGTATGAGTTCAGACTGTTCTCAGGCTGAAATGATCAGTGACTGGCATTATTTTTACCTCCCATGGTGACTTTGAAAATGCCTAGTAATGACAGTAATAACACAGAATAGTCCATTAAAGATGCAGCTTCCCACCCCACTTATTGTCAGCTCTCAGAGATGCATCACACATTGTTGTAGCATTGGTGTGTGTGTGTAAAAAGAATAATAGAGAGCAAAATAAGTTAAATTACAAACTTTAAAGCGTCGGGAGTCGA…
n269620:5434877	5.70468	3.50708	3.78179	3.6673	3.68642	5434877	756	NONMMUT022855	1888	| AK086101 | mRNAlike lncRNA | Mus musculus | Mouse noncoding transcript | FANTOM3 | D930005N13 | http://fantom3.gsc.riken.jp/db/annotate/main.cgi?masterid=D930005N13 | -1.2638900 | -0.4108488	NOCODE4.0		chr15	19014421	19016308	+	ACAGCCAAGTAGTGCCAAGAACATATCAGGCTGAATATTAACACTTAATATGACAGAACTCACTAATGTATATCATAAGCTGGCTTTCAAAAGAAACTAAGTTAAGAAATGAAACTTTCTCCTTTATACTGAATTCAAGTGAGGAACATGCTGTTTCCTGGAGAGATCAATCATTAAAAATGGAATAAGATGACAAGGAAAAAGGAAAACAAAGGCCTCAGAACATTTCAAATTGGTCATAATTTAAAATACAATTTTTGTTAGAATTATTTCTACCTTTTCACACAAGTAGCTTCTTGAGTCAATATTAGATGTCAATAAAGTAATTCTCGTGTCTATACTGTAATTCTTATGTGGAGACTTTTAATTATCTTCTTTCAGAAATGTCAAGTGACACTA…
n269640:4776204	4.37006	4.20901	3.87971	2.24926	3.6214	4776204	471	NONMMUT055906	2046	| AK086084 | mRNAlike lncRNA | Mus musculus | Mouse noncoding transcript | FANTOM3 | D930003I12 | http://fantom3.gsc.riken.jp/db/annotate/main.cgi?masterid=D930003I12 | -1.3374200 | -0.4387414	NOCODE4.0		chr6	21245996	21248033	+	GTTGGGACTACTTCCTTAGGCAGCCATACATTTCCAGTGTTCTAAAAATAAGTGTTAAGGACTGTCCCCCCTCAAAGTTTTCCGTGGCAAAGATTTAGGCTCATACATTTCCTCTAGTTTCTTCTTTAATAAGTTCCAGACAAAATGCTTTAGAACAATTTAAGAAATAATTCTTTCAAAGACCAATTTTGGTAAAACTACAACCAAATTTTGAAGTAATTTTCTCTCGCTCATGCATATAAATAATAATTGATCAGAAATATTTGAAAGTATAGCTCTTACTCTATCTACTGTACATATAGCGCCCATAAGTGTGTTAAGAATATATTTGTGTTTACTGGTTAATTGGGAAAATCTGTCATTTAACCTTATATTTTGTTGCTTTGTAGTCTGGTAAAA…
n269707:4538163	2.5385	3.58799	3.36599	4.7951	2.73254	4538163	437	NONMMUT000884	2154	| AK086021 | mRNAlike lncRNA | Mus musculus | Mouse noncoding transcript | FANTOM3 | D830045I10 | http://fantom3.gsc.riken.jp/db/annotate/main.cgi?masterid=D830045I10 | -1.1363700 | -0.4504888	NOCODE4.0		chr1	52510719	52512872	+	GCTATTGTTCTCTGACCAGCTTGTAAGGTAACCTGTTTATTGTATTCTATGAGTGCCACACGGCTGGTTACCTCTTCTCAGTTTCACCAACTGGTCTCCTCAGACTTCCAAGTGAAGCTCTTCCCATGTCCAACTCTACCTCAGAATCCCTCTCTCTCCCTACTAGAACTCCCTCCTTCTACTTCCTTTCCAAGCTAATAGGCCATCAGCTTTTTGTTGACAGGTACACAAGAGATTATCTCTACACTAAAACTGTGGAACTGTAAGCAAGCTCCAATTACATGTTTGCATTTATAAGAGTTGCCTTGGTCATGGTGTTTCTTCATAGCAATAAAACTCTCAGTAAGACACTCCTTTTCCAGAAAACCCAAGTTTGATTCTGGGCACCCACAAAGTAGT…
n269715:4615457	4.24062	3.56938	3.58525	1.99169	3.57819	4615457	73	NONMMUT034296	575	| AK086006 | mRNAlike lncRNA | Mus musculus | Mouse noncoding transcript | FANTOM3 | D830044D09 | http://fantom3.gsc.riken.jp/db/annotate/main.cgi?masterid=D830044D09 | -1.0255500 | -0.2193287	NOCODE4.0		chr19	27260734	27262323	-	TAGAGACACATAAGGGGCCTGAGTCCAGGAGGTGGTTAGCATGAAGAGCGAGTGTGAACGAGCCACAGGCATC
n269824:5429536	4.28837	2.41026	2.91005	2.10408	3.1263	5429536	1338	NONMMUT014202	2646	| AK085893 | mRNAlike lncRNA | Mus musculus | Mouse noncoding transcript | FANTOM3 | D830025C17 | http://fantom3.gsc.riken.jp/db/annotate/main.cgi?masterid=D830025C17 | 0.0568450 | -0.3363318	NOCODE4.0		chr12	53152182	53154823	+	ACAGTGTTTTGCATAGGGCTCATTCTCTGTGCTTTGGGGCATCTCCTATTTAGTGTGTCTTAAATATGATGTTACAAGGTTGTTAATCAATCATAACATACAAAACTTTAAAAAGAACTTTAAAAAACAAATTAGAATGTTCTTAAACTGCCTTTAAAACCATATCACTCTAATCAACTCTGTTGTTCCCTTTCTTGCGTGGCAAGAAGAGAGCCAAGTAGACTCTTCACTGGAAACTGCTTATTGACAATTGCCCCAATGCCTGCAAATGCCTGTGCTGTGTTTTCAATGTCTGTATCTCTAAATTTGCATGTTCAAGCCTAGTCCCCAGTGCAACAGAACTAATACAAGTCTTTGGAAGGTGAGTAAGTTGTGAAGGAGATAACTGCCCATAGAAGG…
n269868:5438699	3.06641	6.91505	7.1935	5.74686	5.09003	5438699	334	NONMMUT074304	3164	| AK085843 | mRNAlike lncRNA | Mus musculus | Mouse noncoding transcript | FANTOM3 | D830016D23 | http://fantom3.gsc.riken.jp/db/annotate/main.cgi?masterid=D830016D23 | -1.1324800 | -0.3048977	NOCODE4.0		chrX	150491704	150494868	-	GTCTCCCTCAGCTACAATGCAAGGTCAAAGACAACCTAGGCTACACAGGACTCTGTCTCAACCTGCCCCCATTTTCATTCCAGAAAAAAACTTCTAAGGTCAGTGTCTGCTATTGAGGCTGCCATTGTTTGAAGGAGAGAGCCAGGAAACAGCTCTATGCTTGTTGTAAAGATAAAAATGGCCAGGCAGGGTAGCCATGGTAGTCCAGGATGACTGGTGACTAGAGACCCTCTTGCTTCAGCCTCCTGTGTGTAAGGGCACAGGTATGTGTTGCCATGCCTGCAATTCCCTATTTTCAAAAACAGTTGGATGGTGCCAACGTTTTTATGCTCTA
n269917:4446787	4.91821	2.92384	2.6428	2.69623	3.97961	4446787	573	NONMMUT025362	2687	| AK085786 | mRNAlike lncRNA | Mus musculus | Mouse noncoding transcript | FANTOM3 | D830009C06 | http://fantom3.gsc.riken.jp/db/annotate/main.cgi?masterid=D830009C06 | -1.1035500 | -0.3383801	NOCODE4.0		chr16	7160582	7163266	+	AAAGTCTCTTCCGTTTCCGTGCCAGTTCCACATGAGGCATTACAAATGTGTTTACACTTTTCCCTTTACTTTGCATTATTAGTAGAAGATGCTTAGAAAACAGATGAATTAAAGTTGGGTTTGGTGTAGGTATGTCTGTACGTTTTTTAAATTCCCACTGTTTTTTTTTGGGGGGGGGGAGTCTGAGTCAGGAGGATAGAGAATTAAACTAGCCTATGCTATACAATGCATAGTGAGCTCTGTGTTACCAGCTTGGATTCCATAGCACAAACCGAACCTGTCTAAGGTTTTGTTGTTGTTGTTGTTTGTTTGTTTTCTTTGTTTTTTTTTTTGTTTTTTTTTTGTTTGTTTTGTTTTTGCAGAAGCATTTCTGGCTTCTGTAAAAAGTGAAGAAGTAGC…
n269936:4958241	1.54579	4.0728	3.938	4.36173	1.79331	4958241	66	NONMMUT046564	3310	| AK142691 | mRNAlike lncRNA | Mus musculus | Mouse noncoding transcript | FANTOM3 | D830006E18 | http://fantom3.gsc.riken.jp/db/annotate/main.cgi?masterid=D830006E18 | -0.8497540 | -0.4083913	NOCODE4.0		chr4	31938674	31941982	-	GTGATCCTCAATCAGCCTCTCATAAAAATGAGAAATAATTTCAAAGGAAACTCGATACTTACAAGT
n269950:4358600	1.71001	4.32012	4.51919	4.55561	1.68008	4358600	180	NONMMUT052992	1614	| AK052851 | mRNAlike lncRNA | Mus musculus | Mouse noncoding transcript | FANTOM3 | D730050O07 | http://fantom3.gsc.riken.jp/db/annotate/main.cgi?masterid=D730050O07 | -0.8240150 | -0.4910143	NOCODE4.0		chr5	87697808	87699421	-	GAGATCTTCATAGCTTTTGTAAGGCATACATACAACTGTTAATGAAAGAGAGTTAACACAAAAGACTGAAGAGAGTTGTGAGCTGAAGACCACGGTGGCTGCAGCTGAAGTCTGAGTGTAGTGTTTAGTAATAGTATTTAAGGGCCAGAGTAGATCTTGACTTGTTAACTGACTAATCTG
n270022:5610898	5.74892	3.61724	3.9022	2.61822	4.1124	5610898	259	NONMMUT021925	1533	| AK164777 | mRNAlike lncRNA | Mus musculus | Mouse noncoding transcript | FANTOM3 | D730024J22 | http://fantom3.gsc.riken.jp/db/annotate/main.cgi?masterid=D730024J22 | -1.3503000 | -0.4303050	NOCODE4.0		chr14	93860378	93861911	-	TGAGCCTGACAAGACTCCAGTTTTCACTATAATAAATACAGGTATACACATTTTAAAGACTTGGCTCGCTAGTATGAAGAGTTACTCATTTTATAAAATAATTTAGAATTCTAGTCCGGGGATAAGCTTTGTTCCATGAGGAATCAGCACAATATGTCAATGTCAACCTATGATGCCTAAGGAAGAAGCCCTCCTAAACTATTACTACATAGGAATCCATGTACATATGTGCAGCTCTGTAAAGTGCACGTGGCTTTGC
n270237:5341929	4.06724	2.01911	1.91422	1.66175	2.17924	5341929	252	NONMMUT025941	3918	| AK085470 | mRNAlike lncRNA | Mus musculus | Mouse noncoding transcript | FANTOM3 | D630030N08 | http://fantom3.gsc.riken.jp/db/annotate/main.cgi?masterid=D630030N08 | -1.2665400 | -0.2232775	NOCODE4.0		chr16	22653273	22657189	-	GGGTTTACAGGCCTCTACATCCATGGTTAGCTTTAAAACTGTATCTATTTTTACACGAATGACTGTGGGCTATATAACTCTTTGGCTGGGTATCACGTATTAACTTGGAAGACATCAAACTATTGTATGAAATATATGAATGTATATAATATCCCACATCTTCACACAACAATTACAGTCATCTTTACCCTTATAAACATACATCACTATCACAGCCAGGCTCAATAGGCTCCTGTTAGTCTCTTATATTCA
n270391:4539854	6.56235	5.1866	4.24066	3.97648	4.95345	4539854	77	NONMMUT052085	2892	| AK052624 | mRNAlike lncRNA | Mus musculus | Mouse noncoding transcript | FANTOM3 | D630007A03 | http://fantom3.gsc.riken.jp/db/annotate/main.cgi?masterid=D630007A03 | -1.2876200 | -0.3551619	NOCODE4.0		chr5	41626226	41629117	-	AATAGTCAAGTACCCGGAAGAAGATAACCAACACCCCAGCTCTGCTCAGAGTAGAGTCTGTTCAGTACAGTAGTGCA
n270499:5187329	3.78149	3.52565	4.96939	5.82667	6.4392	5187329	506	NONMMUT014805	944	| AK021295 | mRNAlike lncRNA | Mus musculus | Mouse noncoding transcript | FANTOM3 | D530020L18 | http://fantom3.gsc.riken.jp/db/annotate/main.cgi?masterid=D530020L18 | -1.1703200 | -0.1878679	NOCODE4.0		chr12	80112072	80113013	-	ACTGCTTGCGTTTCCCTCCATGGTGAAGGAATTTGTTTATGTCCTCCTCGCACTTAAGTTTCAGGTCCCAGGTGGGGTTCTGTGAATCCGGGGAGCAAAGTTCTGGGCGACTGCTCCAGTTTGCGGGGCAAGGAGGTGCGGAAGAGTGGTTAGGTTTGGGACGAATTTTGAAGGATTCTTTTCTGCATGGTGCACCTCCGGAGCTGGGCTAAGCGGGTGGGCTCGGCTTCGCAGTGTGCGCCTTGGGTTTCCTGTACCCGCTGGAGATGTTCGAGGTTACCCAACACCTTTTGCTAGGGGTCTCTAGGAAAAGCGAGGTCTCAGGGCGGTATCTGACTGGGAGAATTTTCCTGTCTGTTTTGGGGAGCTAAGAGATAATGCGACGAAGAAAGAGGCCGA…
n270548:5003138	4.34867	3.24593	2.58243	2.06854	3.94236	5003138	169	NONMMUT006523	608	| AK085181 | mRNAlike lncRNA | Mus musculus | Mouse noncoding transcript | FANTOM3 | D430050E20 | http://fantom3.gsc.riken.jp/db/annotate/main.cgi?masterid=D430050E20 | -1.1449200 | -0.1341709	NOCODE4.0		chr10	82083015	82083622	-	AGACATCGTGTTTCCCATCTCCGGCTTCCACTACAGGCCAAGAGCGGGCCTAGATCATAAGGCAGGCTTTGCTGTAGAACTTGTTCCTGGACTGCAAAGTGGTCCCTGCACTTTTCCTGCACTCAGTAGGCACGTCCCCGTCTTCCTCCTGGGCAGAGAGTGTTATGTC
n270579:4785239	5.14875	3.44442	2.90898	3.1266	3.87638	4785239	581	NONMMUT038984	3745	| AK085151 | mRNAlike lncRNA | Mus musculus | Mouse noncoding transcript | FANTOM3 | D430044L19 | http://fantom3.gsc.riken.jp/db/annotate/main.cgi?masterid=D430044L19 | -0.0985692 | -0.3303212	NOCODE4.0		chr2	105959751	105963496	-	CACTGGAACCTCATTGGGACTGCTCTTGGATATCCTGTTGCTGCTGCCTGTGTCATGGAGATCCTGTAGTTTTGGATCTGTAGGACCAGCCCCTTCATGCACTCCACCAGTTCATGGATGGGGTAGATGTAGGGTTGGGGTGATTCAAAGCTCTGAACCTGGGCCTGAGAGGTATTTGTGCTGACCAGCCCACTGGTGCTCCTATTTTTCTGCACTCTGTAGGCTCACCAGCAACCCCTCTCCCAAATTGGGTCAGCGCTACCCTGCTGCCGAGGCATGGTTCAGAGCCTGCTCTTCCAAGGGCTGCAGCAGGTGAGGGTCAGGGCTAGCTCTCCTGTTTGCTGTAGGCAGAATTCTTTAATTCTAGGACCACAAATAATTGAAAATACAGTTTGTCTT…
n270809:5050575	4.96739	4.71303	3.21007	2.52292	3.74905	5050575	238	NONMMUT057235	3460	| AK084882 | mRNAlike lncRNA | Mus musculus | Mouse noncoding transcript | FANTOM3 | D430005F18 | http://fantom3.gsc.riken.jp/db/annotate/main.cgi?masterid=D430005F18 | -1.2184100 | -0.3406110	NOCODE4.0		chr6	63660808	63664266	+	CCAGAGGAGCCTGCATTAACACATCAGTATCACCCAAGTCATTATAGATGAGTGTCCAGGTTCATGTATCTGTGGCCATGTTTGTAGAGGCCAGAGCTGGATGCAACATGTTTTCCTCTATCTTTTTTTTCTGTTACTGTCTAGTACTGCTCTGGGTTAGGCTCTCTCCTTGAATCAGAAGTTCACTTTTTTTCCACTAGAGTGGCTGACTGGGAGGCTCCCAGGAACTACTTGATTC
n270852:4388334	5.13124	3.5921	4.43426	3.11473	4.32818	4388334	82	NONMMUT059457	887	| AK084826 | mRNAlike lncRNA | Mus musculus | Mouse noncoding transcript | FANTOM3 | D330049B05 | http://fantom3.gsc.riken.jp/db/annotate/main.cgi?masterid=D330049B05 | -1.5906100 | -0.2519003	NOCODE4.0		chr6	145250551	145251856	+	GCCTTCTGCCCGGATACCACATGGAGAGCCGCTTTGTAGGAAGTGCCCTCGCTCCACAGGACAGATCCGAGGAGACTTCTCA
n270973:5229720	4.75925	2.77115	2.59926	2.70837	3.68148	5229720	519	NONMMUT056138	1617	| AK084680 | mRNAlike lncRNA | Mus musculus | Mouse noncoding transcript | FANTOM3 | D330029C20 | http://fantom3.gsc.riken.jp/db/annotate/main.cgi?masterid=D330029C20 | -1.0298600 | -0.3649360	NOCODE4.0		chr6	30807584	30809199	-	ATGTCTTTGCTATCATCCTGGGAGACTCTGTTTTTTCCAATAGCCATCTTTCATTGCTTCAGAATTCTTCCACAATCACTGTACTTCTCACTAAACTTGTGTGTTATTAATTTTTAAGGGATGCCATTAATTTACACTTAATTACAATAGGAAGCAAATCTGAACCCATTGAAAACTCCAGCCCTTCCCAGTTGAGATTACTAGCTCCTCAGTATATACTCAATACTAGCTCCTCAGGTGGACTCTGATATTAGATAACTCAGGGGACCCACACCCCAGGGAATGGGATTAAAAGAATAAGTACAGTTTTACAATACCAAAATACACAAAACAACGATATTGAAATTACAGCAGTTACATATAGGGAAACAATAGTAACATTAAACACTTCCACCAAGA…
n270982:4612662	3.69656	4.25233	5.26357	6.43532	5.4953	4612662	933	NONMMUT012356	1963	| AK142278 | mRNAlike lncRNA | Mus musculus | Mouse noncoding transcript | FANTOM3 | D330027O12 | http://fantom3.gsc.riken.jp/db/annotate/main.cgi?masterid=D330027O12 | -0.7154990 | -0.1679102	NOCODE4.0		chr11	106154684	106156647	+	ACTGTTACCGGTGATGGACTCCTGAAGAGAGAACAGAAATTGAAAGCAGCTGGTTTTGCAGATATGTGTGTTGCACGGTGCCAATTGGGCCTGGGCCCCTCTGTTTTATTTCCTTTCCCTTGGGGGTCTGTCAGGCCACTCTCTAACTGCTCTGAAGCCAGTGAGCAAAGTCCTGCTTCCACCTCAGCCTTTGCCCAAAGTAGGGACTGGCCCCTCTTCTAGACCAAAGCTGCCAAAAGGCAGCTGGGCCTCTCCATGACCCCATCCTGATGGCTATATAGCACCCTTTAGCCTATCCCTATCCACACCCCGAACCCAAAGGAGATAGAGATTGGTGGGGTGACAAGATGTTAGATGAGACAACTCTGCTTGTCACAGGTTCAGGCTCTCACGGAGCTC…
n271071:4995196	6.12955	5.92371	5.28285	3.59445	5.59585	4995196	225	NONMMUT057488	2377	| AK084580 | mRNAlike lncRNA | Mus musculus | Mouse noncoding transcript | FANTOM3 | D330016O20 | http://fantom3.gsc.riken.jp/db/annotate/main.cgi?masterid=D330016O20 | -1.2014500 | -0.3903478	NOCODE4.0		chr6	77341149	77343524	-	TGTACAGAACGTAGCAACACCAGGACTGCTGAAATGTGTAAAGGCTCAACACTCTCTTTAAGTTTAATCTCACTTCAGGACACTAAAGGCTGACTTGAGGAGTTCACTGGATTTCTTTATCCCTTTCCCCAACATGACCACATTAAGTTAATCTCCCCTTTCTAATTTGACAAGTTGATTTGCTTACAGAGGATAGGTGAATGCATCTGGTTTGGGTTCCAGCTC
n271153:5042378	3.62947	2.69152	3.20871	7.42692	5.36957	5042378	372	NONMMUT043086	3836	| AK052220 | mRNAlike lncRNA | Mus musculus | Mouse noncoding transcript | FANTOM3 | D330010A20 | http://fantom3.gsc.riken.jp/db/annotate/main.cgi?masterid=D330010A20 | -1.5906100 | -0.3306866	NOCODE4.0		chr3	54378483	54382319	+	TATAACCTCTGCCATGGTGGTGCCAGACCCTGAGAGCTATCTAAGGGATTCCACTAGAATCATGATGATTTAGCATTTTCTAAATTCCAGCCATGGAAATATATATCTTATAATAAATACAAGAGTCCTCATGGCCTCCATCCATCAGATATAAATGACACCATCCTTCTCCCCTGTGCCATAAATCCTTAGGAAAGTAGTATTTATCCTTCTTAGTTTATCTACATCCATTCTATTACTGGCTGCACATGGCAACATGGCTTATAATGAACCAAAATACTATTATAGTATTTCATAAACTATGTCTACAAAATTATGTAAATCTAGTAACTTGCCAGCCCACTCAAAGGCCTTACGGAGCTATGGGATTTA
n271153:5070657	2.66651	2.99095	3.8274	6.89387	4.6471	5070657	463	NONMMUT043086	3836	| AK052220 | mRNAlike lncRNA | Mus musculus | Mouse noncoding transcript | FANTOM3 | D330010A20 | http://fantom3.gsc.riken.jp/db/annotate/main.cgi?masterid=D330010A20 | -1.5906100 | -0.3306866	NOCODE4.0		chr3	54378483	54382319	+	ACTGGCTAGCTATGGGTGTCATTCATTCTTGAGTCTACAGTTGAGTCATCCTTTAGAATCTGTGCTTAGCTTAAAAAAAAAGAATTTCAATTATTCCATTGCTTTTTATTTATTGATGAGTAAAAAAAATTGGGGTTTTAAGTAGAAATTAAATCTAAAGTGTTTTGATGGCAATATATATTTGATTGTTAGTGAAAATTATCAACCAAATTTAGGCAAAAATATTGGATGTTTTTTAAATCATAGTCAATAAAATTTGCTATAACTGATACACAGCTTCTAAAACTAAAGTCATCCGCAGGTGCCATTGTCCCATTTCCAAACACTTTTCTCCTTCCATTCAACTTCTTCACTCAACTCATGTGTCCTCCCAGTCTTTGTCAACAGGGGTATGTGTGT…
n271153:5543297	2.0749	1.94603	2.15409	7.09438	4.69783	5543297	328	NONMMUT043086	3836	| AK052220 | mRNAlike lncRNA | Mus musculus | Mouse noncoding transcript | FANTOM3 | D330010A20 | http://fantom3.gsc.riken.jp/db/annotate/main.cgi?masterid=D330010A20 | -1.5906100 | -0.3306866	NOCODE4.0		chr3	54378483	54382319	+	TGACTCTTTGTCACACGCATGACTGAAGTTGGCAACCCTTCTACTGGAATCACCTTTTAAGGCTTCTACTTAGGAGTGCAGAGGCCTAAGTAGAACTGGTGACCTGGCTCTTACATAAAAATAAAATAAAAACAACCAACAAACAAACAAGCATAAAACCATCCATCCAACCTAAATCCATGATAGCCTCACTTGGGAGATGATATACATTCATCATAAAACCTTTACATGGAAACCTACCTTAAAATTATCAAAACAAGGCTAAAAATTAAATGTTGACCAACTCACATCTGTTGCAAAAAGCTCATGACTTCCTGGCTGAAATTTA
n271192:4958419	3.5948	5.52055	5.2324	5.64648	4.29049	4958419	300	NONMMUT031930	1656	| AK052185 | mRNAlike lncRNA | Mus musculus | Mouse noncoding transcript | FANTOM3 | D330004O07 | http://fantom3.gsc.riken.jp/db/annotate/main.cgi?masterid=D330004O07 | -0.5572080 | -0.3092425	NOCODE4.0		chr18	34949568	34951223	-	GCATGTCTATGTACTGGCCAGGAGGTGTCAGATTCGCAGGAACTACAGTTACCAATAGTTTGTGAACCACCATATAGGTGTTAGGAATCAAACCCAGATCCTCTGGAAGAAGTCAGCACCCTTAAGTGCTGAGCAGTCTCCAGTCTGCTTTTATTTCTTTTTCTTTCCCTTTTGGATTTCTTTCTTTTTCAAGACAGGATGTCCTTGTGTAGCCCTGGCTGTCTTGAAACTCAGAAATCTACCTGCCTCTCTGCCTCCTGAGTGATGGGCTCAAAAGCATGTAACACCACTGCTACCTGG
n271265:4361024	2.03919	3.39092	4.35182	4.31195	3.67744	4361024	504	NONMMUT031424	2108	| AK052118 | mRNAlike lncRNA | Mus musculus | Mouse noncoding transcript | FANTOM3 | D230048A16 | http://fantom3.gsc.riken.jp/db/annotate/main.cgi?masterid=D230048A16 | -1.1298100 | -0.3850085	NOCODE4.0		chr18	9762734	9764841	+	TTTGTTTAGAGCTGATCCCTGGGTGGGGTCATAGCTTGTCCCTGAAAATTGACTCTGTCTCTCAGCAGCTGTTTTGCCTGAAGTTCTTCATTTGGGGAAGAACCCTGTAAGATTTACTCCCCCCACCCCGGTCCCCATCCACACTGGCATGTCAAATGGTGGTATTGTTGTGCAGGTATTGTATATGCCACCGTACTTTTGCGTTTTCATGGCTATAGCTTTCCTGTCATATATGAAAGACACTATCTCACAGCATGCATTGTGACCCTCTGGCTCTTACAGTCTTCCACCTCCTTCCATGACCTTCCCTGAACCTTAGGTGTAGGAGTTGTGCTACATTGTTTATCACTGGAGTTGAGCATTCCATGATCAGTTAAAAAAATAGAGAATGCTTAATGA…
n271273:4865941	2.77915	2.95947	3.63335	5.5092	4.93095	4865941	561	NONMMUT047279	3466	| AK052111 | mRNAlike lncRNA | Mus musculus | Mouse noncoding transcript | FANTOM3 | D230046M12 | http://fantom3.gsc.riken.jp/db/annotate/main.cgi?masterid=D230046M12 | -1.1121700 | -0.3269207	NOCODE4.0		chr4	53133623	53137088	-	GCTTAGCCCTTAACCATGTTGCGGATTTGCTGAGAACACAGTAACAGAAGGGAGAGCCTCATATGTAAACACAGCTCTTGTGCCACAGGCTGATAAAGGCACAGCATACCTGGATCTCAGAGGAAGGGCTCCAGCCTTACTGGTAGAGAAGTTATTTTCAGTGTTCAGGAAATCCAGGCTGTGTTCTCTGGTAGAAAGTCATCCCCGACTCCTGCCCCTGAGCAGTTTACAGAGGTGTAAGGGACAATAAAAATTGTATGGTGTCATGGTTTGCAATCCGTGCCCATCACCCTCTCCCAAAGGAGTAGTAAATCTATTTTCTATGAAGGAAAAGAGAAGAGGCTGAGTGTTGTTTGCAAACGTAGAGGTTTTGTTCCTTCTTTGGGATTATTTACAGAC…
n271314:4847280	4.80887	3.69365	1.92507	1.90967	3.46916	4847280	276	NONMMUT042282	4082	| AK052082 | mRNAlike lncRNA | Mus musculus | Mouse noncoding transcript | FANTOM3 | D230044H07 | http://fantom3.gsc.riken.jp/db/annotate/main.cgi?masterid=D230044H07 | -0.9557580 | -0.3269104	NOCODE4.0		chr3	25542534	25546615	-	TATTGGGACCCATATCTGGATTCTCAGCATTCACATGAAAGGGAAGATTTGGCAGCGCATGCACATCTGTGACATCAGCTCTGAGAAGCAGCACACAGGGGGACCTTGGAGGTTTGCTGGCCATCCAGCTTTCCAACGTGGTGAGCTCCAGGTTCAGTAGGAAGAAGAGCTTCTCTCAAAAATTAAGGCAATTTGTAATAGATAAAAACACTCAGCGTTGACCTATGGTTTCAACATGTGAAGGCACACAGATCTGAGGATTCTTGTGCATACATG
n271426:5556362	4.45914	2.28676	2.63301	2.18527	2.80919	5556362	477	NONMMUT065327	4192	| AK142095 | mRNAlike lncRNA | Mus musculus | Mouse noncoding transcript | FANTOM3 | D230033K09 | http://fantom3.gsc.riken.jp/db/annotate/main.cgi?masterid=D230033K09 | 0.1362930 | -0.3393255	NOCODE4.0		chr8	38560422	38564612	-	CACTACAAAGCTAGGAGTTGCATTCAAATCATGTTTTTTTCTTTCTTAACGTGAAGTAATGTCAAACTTTATTGTGTATTACTTCCAAAAATGAAAGTAAAGTTACTTTCATTTTAAAGAAGAGAGCATGAAAAGAAGTAATGTATTAATGAAAGGAAGTACCTGGCAAAGATGTTAGAAGGGAGGGGTAGAATTCCTCTCAGAAATATGAATTCTTGCAGATTCATTTTAGGTTAGAGTAGTTAATATTTGCTCTACTTTTTCCTGTTTAGGATTTTCCCAATGTCATTGCTTTAATATCTTAAAATACACACACACACACACACTTGTAGATATTTCTTTTGGGAACAAAATTTGTGGGTTTCTTTCATGTACATGGAACTATTCATTTTAAAAGTC…
n271475:4455090	4.06594	2.28706	2.89446	2.04622	3.05467	4455090	480	NONMMUT026624	1406	| AK084346 | mRNAlike lncRNA | Mus musculus | Mouse noncoding transcript | FANTOM3 | D230028I22 | http://fantom3.gsc.riken.jp/db/annotate/main.cgi?masterid=D230028I22 | -0.2315060 | -0.4038482	NOCODE4.0		chr16	40776513	40777919	+	TCACAAAGCATTGGGCCACTGAGTAAGACAGAAAATATGAAAAATAAAAGTCCAAGAGCGATGAAAACTATATTCTCTTTTTGTTTGTTTTTATTTATTCTTTTAATACAATACATCCTGAACACAGCCTCCTTTTCCTTTGCTTCTTTCAGTCCCCACTGCAACCTCTCCTCTCTCCAAGATCTACCATTTCTTCATGTCTATTCAGAAAAGAGCAAGTTTACTAAGGATATCAACTCAATACAGCATAACAAGATGCAATAAGACTAGAATGAAACCCTGAAAGCAAGGCTGGAGGAAGCAAAACAGTAGGAATAAATGGGTCCTAAGAGCAACCAAAAGTGTCATAAATACACCCCACTCCCACTTTTAGAAGTCACACACACCCAAGAAAAAAAC…
n271528:5457020	2.24428	3.99702	3.29559	4.90087	1.82426	5457020	166	NONMMUT026568	2236	| AK051936 | mRNAlike lncRNA | Mus musculus | Mouse noncoding transcript | FANTOM3 | D230020M17 | http://fantom3.gsc.riken.jp/db/annotate/main.cgi?masterid=D230020M17 | 3.9177800 | -0.2056714	NOCODE4.0		chr16	38539485	38541722	-	AACTTCCTCTCTGGAGTCTTGCGTAGCTGTAAGGGGATTCCAGATGTTATACTTTGGATCTTATTCTTTTCGTCTTTATGCTTCACCATAGAATTTAGAACAATGCCTGTGTCATTTCCCATTGAGTACAAAAAGACAAAACTCTCCAATCAGTGCATAGTGTTTA
n271535:5528615	4.96127	3.51372	2.84541	2.85052	4.45434	5528615	300	NONMMUT022718	2433	| AK051932 | mRNAlike lncRNA | Mus musculus | Mouse noncoding transcript | FANTOM3 | D230020B18 | http://fantom3.gsc.riken.jp/db/annotate/main.cgi?masterid=D230020B18 | -0.4468380 | -0.4716182	NOCODE4.0		chr15	9185942	9188377	+	AGTGATGTTGCCGACTTCTCATGTAAGTTGTTAGCACAGAGAGTACACCTATGCTGAAGGAAATTACTCTGGGGGATAGAAAAAAGGTTCTCTCTTAGGAGGGTATTTTTATACCAAATATTTCCGTAATGAAAATTGAGCTGAGTGTTCAGAAATGAATAATAGTTACCTAGATGAAAGGGGTTTTATCTAGAAAGTGACCGAGCTGTTGTGCTGTGAGAGGATGTTTGGGAACGCGCTTTCTCATGACTCTAGAGCTTAAACAGGAGGCCCCTAGCAAGAGGGGCTCCAGGCAATTTA
n271536:4542271	2.79223	3.90187	3.64712	5.0599	4.36342	4542271	556	NONMMUT055815	3294	| AK051931 | mRNAlike lncRNA | Mus musculus | Mouse noncoding transcript | FANTOM3 | D230020A22 | http://fantom3.gsc.riken.jp/db/annotate/main.cgi?masterid=D230020A22 | 0.4668780 | -0.3759308	NOCODE4.0		chr6	15366134	15369427	+	CTCATCAGCAACCTCCAGTAAAGTGAGAACATTCTAATGGTCTGAAATTCTTTGGGAAGTTGCTGGTGTTTTCTCATCAGGATCCAATTTAGAGGGCTTTGTTCCATTCTTGAACTTTGGAGGCAAAGAAAAGCAAGTCCATTTGTCGCCTTTTTTGGGGTGAGCTCGGAAGCAAAATCAGTATAGCCAGCAGCAGGAGGGTCTGGGAGAGCACACATTTTTTGTCAAGAAATACTTCAAAATAGTCAGTATGTCCTTTTCCCTATAGAAAAGTATGCCCCCATGGTAAGACCTAGAAATAATATCGTTGAAGATATCAATATAGTTATATTTTATAAAATAAAAGAAATGCCTTCAAGCAGGCTAAATATTTTATTGCTCTGTGGTGGCCAGAGTGAC…
n271551:5284389	5.20268	3.29437	3.99146	3.14331	4.80994	5284389	307	NONMMUT052366	1196	| AK084303 | mRNAlike lncRNA | Mus musculus | Mouse noncoding transcript | FANTOM3 | D230019F05 | http://fantom3.gsc.riken.jp/db/annotate/main.cgi?masterid=D230019F05 | -1.2109100 | -0.3614685	NOCODE4.0		chr5	57961593	57962788	+	TCGCTTTTCTAGTGTAGGTCCACTGAACAGACTTGTAATGAGCACAAGGTTCCTTCAAAGGGTGAGGTCATCATGACTACCATAATGCCTAAACGATTTTATATAATTGTCCTTTACAACACAAGCAAATTATCTCTGAAACTGGGTTCCACTTCACAGATCTTATTTTGCTCTTAAAACCGCCGGCCACACCCTCATCAGCCCACACCCCAAGCTGCATTTTTCACTTGACCTATAATTACAGAGGCAGGGCCAGCTCTACTCTATCCCAACTATGCCACACCCGACAGAGATCCACACATTTAGC
n271620:5610793	1.83844	4.49375	4.3685	4.66892	1.70567	5610793	321	NONMMUT014549	3037	| AK084255 | mRNAlike lncRNA | Mus musculus | Mouse noncoding transcript | FANTOM3 | D230014K09 | http://fantom3.gsc.riken.jp/db/annotate/main.cgi?masterid=D230014K09 | -1.5906100 | -0.3743119	NOCODE4.0		chr12	70940344	70943376	+	AGCCCACTGTGTTTCTAGGTTTATGTAAGTATGCTTTTAGGATGCTGCAAAATAACTAAGCCACCCAACAATGTGCTTCTCACAGCCTCTCACTGAGTAATACACGACTGTCAGAAGGAAGTCACATAGTGTAGATCCAGGGTTATAAAAATAAATGTCTTATAAAAGAGGAGGAAAATGAAATCTGCCTTAAAATGAGACACTGGCTTATTTCAATATAAAAATTTGTATATACTTTGCTTCTTCCTTTAATGTGTGATGTAAACTTAATAAATGTTATTTTTATATTTTTTCTTTGACCCTTTAAGTGCATCAGAGATA
n271624:4799041	2.23226	4.22044	4.54655	4.89807	2.48533	4799041	449	NONMMUT009193	1839	| AK084253 | mRNAlike lncRNA | Mus musculus | Mouse noncoding transcript | FANTOM3 | D230014F09 | http://fantom3.gsc.riken.jp/db/annotate/main.cgi?masterid=D230014F09 | -1.5906100 | -0.3198327	NOCODE4.0		chr11	32690105	32691943	+	CCTGGTTCTGACTAGTCTCGTTAGCTATCTTGCTCAGGGATTTTCTGTCTTTGCTTCCCAGATGCTGGGATTGCAGTGGTTTTTACATGGGTCCCAGGAAAGCACTTCATGTCATGAACTAGCTCCCTAGTCCCAGGTTTTAATTTTTTAGAAACAAAAATAATTTTTTCCATTATCAGTAATAAAAAGAAAAAAGCTTAAGGCTGGGGATGTAGTGCTAGCTTGCAAATCATGTGCAAGGCCTGACTTCAACCCCAGCATTGCAAAAATAAACAAGTAAATAAATTAAAATGAATAAGTAAGTAGATAAACCCGATTCTCTTTAAACTGAAAGGGGGAAGGTGTTTGTTTCAGATATTTCATCATATCCATTCTTAGCTGTATGGTCACATAGTCTGA…
n271638:5294470	2.50355	2.19668	2.67499	5.06899	4.61485	5294470	331	NONMMUT027018	2802	| AK051864 | mRNAlike lncRNA | Mus musculus | Mouse noncoding transcript | FANTOM3 | D230012C07 | http://fantom3.gsc.riken.jp/db/annotate/main.cgi?masterid=D230012C07 | -0.9385370 | -0.2868482	NOCODE4.0		chr16	57751914	57754715	-	GTGAGCTTCTTAACTAGCAACTGGTTTGAAAACAAACTTCTGTTTGAACAGTAAAATAAAAATTCCTTTTTGGCAGAAACAACAGCATTTCTATTACAAAAATCTTTTCTCTTTTTAAGTCACACTGCCCCCCCTCCCCGCGTGCCCCGTCTGTCTGACTGCTTCTGAGGTTAAATGTATCTGTTTGCGGTATTATGCTTGTGTTTTTAATTGTAAATAGTTCACATATCAGTAAGGGCAGGGGAATCTGTCCCATTGTCAAAAAAAAATGCACTTTAAAGGAGCACAATTACTTCTCTAAAAATAGCACAGTCAAAAGGTCGGCTGCTGA
n271723:5138722	3.09279	5.52223	5.67603	5.40803	3.1911	5138722	462	NONMMUT032112	1948	| AK084173 | mRNAlike lncRNA | Mus musculus | Mouse noncoding transcript | FANTOM3 | D230005A04 | http://fantom3.gsc.riken.jp/db/annotate/main.cgi?masterid=D230005A04 | -1.1003900 | -0.2827982	NOCODE4.0		chr18	38861738	38863686	+	ACCTGGGTCAGCTTTATTTAAGATAGTTTTTTTATTCTCTTCCATATGTGGCATGAATTAGCTAAGCTTTTCCTTTTGTTAAATCACAAAGAAGATGAAGGAAGCAAAGATGAACTGTTGTGTAAGGGAGAATTCAAGTCATTGTTGCAGAGTCAGATACGGGCATCTGGACGGTTATGGAAGTGACTCTTGGGGATTGGAGAAAGGTTTATAGTTCTGAGAACCAAAGACAGACAGACATTGACACCTGTATGTCTGTTTTAACCCCTGTTGCTGGTTATGTAGCAGAGTCTATCCATGTACAAAAGCATTTTGCAAACTGCATAAGGGCATTAAAAATAGTGAGTTTCTATTACGGTTGTCCTCAAACCTAGCACGTATAAAACAGGACCTAGCTTC…
n271812:4350076	6.30222	5.92342	5.14842	4.22291	5.05972	4350076	520	NONMMUT054030	3916	| AK084080 | mRNAlike lncRNA | Mus musculus | Mouse noncoding transcript | FANTOM3 | D130084I19 | http://fantom3.gsc.riken.jp/db/annotate/main.cgi?masterid=D130084I19 | 0.5072290 | -0.1778620	NOCODE4.0		chr5	115180230	115184144	-	GACACGCGTTAGGATGCTCACTATCATCCGAGGTAAAGGATGGAGTATAAAAGCGGAAGAGAGTGGTGATCGTTACCGCTGCTTCTGTGGTGAGGTTTCTGTTTGTAGCCCAGGCTGGCCTGGAAATCAAGATTCTCTTGCCTTAGCTGCTGCATATTAGAAATATAGTATAGACTTGAGCCACCATACCCAGGAAGACTTTATTACCCAGAGCCTCATGCGTGCTGAACCCTGTGCCTCTCTCTACCACCAAGCCATAGTACAGCAGGCGAGGTTCTTAGTCCCCTGGTGGAAGTGATCATAATTCGTAGGAATCATTTCTTCTTTTGGATTATTTACAGCATATTTGCCATCACACTCCCTCTTTTCTTCTGAACACTTCCCCTGGCTAGGTTTGCA…
n271967:5416675	6.70022	5.81656	6.20421	4.58575	6.45	5416675	540	NONMMUT045271	2805	| AK051697 | mRNAlike lncRNA | Mus musculus | Mouse noncoding transcript | FANTOM3 | D130066C13 | http://fantom3.gsc.riken.jp/db/annotate/main.cgi?masterid=D130066C13 | 0.2288200 | -0.3008146	NOCODE4.0		chr3	130026637	130029442	-	GGCTCGGGCAGCAATTCAATGTCTAGCAGCATTCATTGGCTGATTATTCTGGCCAGCTTGATTCTCGGCTTCCACCATCCAAGGTAGTATACTGTACCTGACTCATGGGGTTGCTTTTCCTGAAGGCACACAGTCTTAGCCCCTTGTTTTAGCTAACCTGTTTACACACGCTCCTGACGATGTTACAGCCCCTACCACTCCACCACTCTTCCTTGGGTTCTGAAGTACCATGCACAGTATACTCAGTGAGTTAACTCTGCAGTTTGCATAGTTTTAGATTATTTTGCCTTTCCCTCTGTCAATATTTGCAGCCTATACTCTTACATAGTAGGAGTATGGCAAGCCTTAGAGATGGCCTACATTGGTCAGGCACCAGATCAGAAGGTATACCATCTTTTC…
n272008:5499685	6.1634	5.29687	4.35187	1.90525	4.77782	5499685	686	NONMMUT000842	983	| AK051652 | mRNAlike lncRNA | Mus musculus | Mouse noncoding transcript | FANTOM3 | D130061O08 | http://fantom3.gsc.riken.jp/db/annotate/main.cgi?masterid=D130061O08 | -1.5906100 | -0.3960797	NOCODE4.0		chr1	51077891	51078874	+	TAAAAAGTATTGCTCCACTCCCGTGACTCCACATGGAAAATGATTGTGTTTATTAGCAAAGGAAGAGCTGCATGTAAATATTTGAGTTTTATTATTTTTTATGCATTTCTATTCTTTTCTATATCAAGAATGATAAGGCCTGCCTCTAAGGTTCACATAATTAAGTAAAATTTACAAGTACAATTATTACCATATTAGATCAGTATTTCTTGGGCATAGTCAGTATGGTGGTGTCTACAAATTGTTGTTTAATACTTTGTGTCAACAAATCCCCTATGTATGACCCACACATTCTACTGCATATGCTGCAAGTAGCCTAACTTTAACTGAAGCTAAAAGATCCAAAGGTCACTTAGGAAAATAACTTAGTAAAGACAGTTCAAAGTCACTTAAAAGCCA…
n272029:4384856	2.26443	4.6082	4.1202	5.04503	2.81993	4384856	100	NONMMUT014156	2373	| AK051619 | mRNAlike lncRNA | Mus musculus | Mouse noncoding transcript | FANTOM3 | D130060I23 | http://fantom3.gsc.riken.jp/db/annotate/main.cgi?masterid=D130060I23 | 1.7273900 | -0.3801693	NOCODE4.0		chr12	51804340	51806713	-	TTGAGAATAGTCTTAAGTGACAACCATTGTGGTATCAAGGTTCCTTAAAGGTTGGGAAATGAAATCTCCTGATGACGGCTAAAGGTAGAGATATGCTTCC
n272030:5588738	2.12568	2.77362	2.14462	4.54603	5.00579	5588738	161	NONMMUT026803	2811	| AK051620 | mRNAlike lncRNA | Mus musculus | Mouse noncoding transcript | FANTOM3 | D130060J10 | http://fantom3.gsc.riken.jp/db/annotate/main.cgi?masterid=D130060J10 | -0.3419800 | -0.3020978	NOCODE4.0		chr16	45793243	45796053	-	CAGGCCATCATTTCCTTAGAACACGAATCTTGTTTGTTTCTCTGCACAGATACAGTGTGGCGCTGTGGGCATTCTCAAATATACACACTGAGCTGTGTGTTGAAACTGAAGCATAGGTCACTGTCCCTAACATATACTCCTGAATGGAAGCCGAAATTCTT
n272047:4503631	4.57705	3.03481	2.29787	2.2789	2.79267	4503631	192	NONMMUT026627	2764	| AK141903 | mRNAlike lncRNA | Mus musculus | Mouse noncoding transcript | FANTOM3 | D130058O20 | http://fantom3.gsc.riken.jp/db/annotate/main.cgi?masterid=D130058O20 | -1.1986700 | -0.3688105	NOCODE4.0		chr16	40785998	40788608	+	GTGGGTCACCTTACTCATAGAAGAACATTTAAGGGTAACTCACATGGACAGAGTAATGCCTACTTGCATGGAAACTTATCACTCTCCCTAAACAATGTTGTCGTTGTCCACACAATGACCATGACCTTTAGCCCCTTATCAGTTACTCCTGTTTCCCCAAAGCTGAAGGCCAGCTGTAGCATCCATCAGAGC
n272049:4491333	2.45103	3.99673	3.2076	4.49802	5.31375	4491333	400	NONMMUT062809	1796	| AK051583 | mRNAlike lncRNA | Mus musculus | Mouse noncoding transcript | FANTOM3 | D130058I17 | http://fantom3.gsc.riken.jp/db/annotate/main.cgi?masterid=D130058I17 | 0.1731960 | -0.3760951	NOCODE4.0		chr7	97128857	97130650	+	CCAGCCCGTGTGTGGTCTTTTTGTGAATTAAGAAAGGACCTAGAGGGGTTAGAGAGATGTCTTACTGGTTCAAAGCACTGGCTGTTCTTGAAGAGGACCCAGGTTTGATTCCCAACACCCACATGACAGCTCACAGCATCTGTTACTCCAGTCCCAGAGGATCTGATGCCTTCTCCTGGTCTTCCTGGGCATTAGGCATATACATAATGTACAGATACACATTTAAGCATTCATACATACAAAATAAGTAAATTTACTAAAAGACCTAGATGTGAAAGTCTAGCTGACTATAATGATTACACAATAAATATTTTACACAATGGTGCTTGAGAGCTATTAATGAATAGTGAAATTAATGTAATAAGTTGCTATCATCCTTTTGATGCCATGTAGGAATGCA
n272049:4710887	3.99767	5.16494	5.44856	6.0406	5.49935	4710887	341	NONMMUT062809	1796	| AK051583 | mRNAlike lncRNA | Mus musculus | Mouse noncoding transcript | FANTOM3 | D130058I17 | http://fantom3.gsc.riken.jp/db/annotate/main.cgi?masterid=D130058I17 | 0.1731960 | -0.3760951	NOCODE4.0		chr7	97128857	97130650	+	GTTTGTTTGCCTTACCCTGATTCCATTCCTATGTCCCAGAATTTCCTTTTTCCCACCCAGCTCTGCAACAACAATCAATCTGTGGCTAAACTTCCATTTCTTTTGGACCAACTAATACCCCTCCTCTCTCCACTTCCTCCTTAGGGCCTTGGACAGGAGCCCTTTAATTGCTCTAGACTTAAAAAAAAAAAAAGGAAAAAGAAAATCAGGGACCAGCCCCTGCATACCAGGAATGCCAGTGGCTTTGTTAGCTATGAGGGCACTGAATTAGCACTGCCCTCTAAATCCCAGAGCAGGTGGACGATATCTAATTGGCATTCAGTATGCCAAGGTTCCTTAGG
n272134:4449087	6.7164	4.7497	4.24118	3.53185	5.89879	4449087	1343	NONMMUT026643	2110	| AK051477 | mRNAlike lncRNA | Mus musculus | Mouse noncoding transcript | FANTOM3 | D130051P21 | http://fantom3.gsc.riken.jp/db/annotate/main.cgi?masterid=D130051P21 | -1.0203100 | -0.3634784	NOCODE4.0		chr16	41697932	41700041	+	GATTGTTACTCTGCATTGGTCCATGAAGCCTAAAAAGTTCAATTTTTCTTTTTTCTTTGGGTCTCAGAACACTTTACTTTCTGTAATTATGGACTTTAAATTAGCTTACAAAGCAGTGGCTTTATAAAAGGCATTGTCATGCATTTTTAGTTTCCCTTAACCTACCCCAATGCCATTCACCATTCCTATTCCCACTTAAATCTTTAGCCCCTGGTTCCCCATCCTGTGTTCATTCACACTATGAGAACAAATTACTGTTTTACCCCCTAAAATAACATAAAAACCTATCTGAAAGCATAAAATATGTAAGGAAAAGTATTCCAATTAATTCGTGCCAATAGGTTTCTTTTAGGGTTCAATTTTAATATCACCTTTGATAATTTCCTATACAGAAAAAGT…
n272152:4325491	6.44468	5.06772	4.49091	4.13034	5.52874	4325491	66	NONMMUT044967	3510	| AK141880 | mRNAlike lncRNA | Mus musculus | Mouse noncoding transcript | FANTOM3 | D130048N24 | http://fantom3.gsc.riken.jp/db/annotate/main.cgi?masterid=D130048N24 | -1.1858800 | -0.4190678	NOCODE4.0		chr3	118537020	118540531	+	ATCAAGATCTGAAGGGGGGTTACCAGGAAACTTGTTCACTCTGGGCCACCAATGGAGCACTCTGTC
n272320:4305394	6.74479	3.68441	5.02963	4.29653	5.78719	4305394	668	NONMMUT055173	3692	| AK083834 | mRNAlike lncRNA | Mus musculus | Mouse noncoding transcript | FANTOM3 | D130017N08 | http://fantom3.gsc.riken.jp/db/annotate/main.cgi?masterid=D130017N08 | 0.6541160 | -0.2662359	NOCODE4.0		chr5	143765832	143765904	+	TGCCAAGCCAGGGATGTAATTAACCTCAAGAAATAGAGGGCAGAGACTTGGGCCTTCTCTCTGAAGGGAGATGCTAAGGGTGAAAGGTAGTGAAGGGAAACGACCACTAAGGTCCGCGGCCTCTGGCAGGGACGACACCAGTGAGCACTGGCAGCGTAGCTCAGACTCCTGGAAGCAAAGGTTCGAGACCATTCTTAGAAAAGATACGAGGGCTGGGGTTGTAACTCAGTAGTAGTGTGCTTGCTTAACTTGCCTGAAGCCCTGGGTTTGATTCCCCAGCACCCAATGTAAGTGTGGTGCCCATGCCTGTAATGCCAGCTCCTGGGGAGGCAGAGGCAGGAGAGGCAGGTCATCCTGTGCTGCACTGCAAGGTCGCAAGGTCGCAAGGTCGAGGCCAGC…
n272320:4804386	5.65033	3.88513	3.21096	3.18298	4.23486	4804386	584	NONMMUT055173	3692	| AK083834 | mRNAlike lncRNA | Mus musculus | Mouse noncoding transcript | FANTOM3 | D130017N08 | http://fantom3.gsc.riken.jp/db/annotate/main.cgi?masterid=D130017N08 | 0.6541160 | -0.2662359	NOCODE4.0		chr5	143765832	143765904	+	GGCAGTAGAACCATCTCCCAAGTTTCCTTCTGGTCCCCTCCCAGGGCTATTACCATCCCACCTTCAATCCCATCCTTAGCAAGTACAGGTGTCTAGGAAAGTGGCATGAGGACACACAGATGATAAGCCAAAAGTCTTAACTCACCTCAAGAAATAGATGAAAGAAACTCGGAGACTATTGGGAATTCTCCTCTTTGAGTTATGATCCTCTTAGTGGAGGATGGGGGCGGGGGGCTGGCAACAGACTTGACCACAGGAGTCAGAGGTTCTAGGACCTGGTGACTTAGTTACTATCTGTCACACCAATAGGCCTTCTAGAAAAAAAGATAAGGGGTTGTTATTTAAAAAGGATACAAGGGGCCAGAAGGATGGCTCAGTGGGTAAACTGTGATGACTCAA…
n272348:4813496	5.16665	3.01476	2.95724	2.95503	4.17771	4813496	448	NONMMUT020706	2044	| AK051193 | mRNAlike lncRNA | Mus musculus | Mouse noncoding transcript | FANTOM3 | D130013N07 | http://fantom3.gsc.riken.jp/db/annotate/main.cgi?masterid=D130013N07 | -1.0822500 | -0.3524517	NOCODE4.0		chr14	49675976	49678020	-	GGCTTGCAACCTGGCATGTAGATTTGTTGTGGGAATAACCAGGAGACACTGGTCTTGTTGGGGTGTAACCTGGAGACTAGAGATAGGCTCAGGTTTTGTTGGGAAGCAACTTGGAAACTAATGCTAGAAACCAGCCTGTTAGTTTACCTGAGTTCATGCTTAGGTCTGGTTCTCTAAAATGGAGTCAGAATTTAAAAGCATCTCATGATAACCACAAACACAATACACTAGAAGAAAGCAGGCACTTAGCAAGATAGAACGAAAGTTCTCACCCAAGATTGTCGTCTACAGCTAAAATGTTCAAGATTGATATTGCCTAAGAGGTGCAACATTTTATGGGATGGGAATGGATGACCTGAGAGAGAGTAGAAATGGAAAAATAACTTTTATCATCAACAT…
n272424:5071146	2.34869	2.92089	3.30319	4.45456	4.43893	5071146	168	NONMMUT023591	2476	| AK141801 | mRNAlike lncRNA | Mus musculus | Mouse noncoding transcript | FANTOM3 | D130003O15 | http://fantom3.gsc.riken.jp/db/annotate/main.cgi?masterid=D130003O15 | -1.0234500 | -0.3119634	NOCODE4.0		chr15	58815603	58818078	-	GTGAGTGTGCTTATAACGTACCTTGCACCAAATGCCACAGTCCTTCTATGCTGTATTTTGGTACAGCGATTTTATCCGAGGCTACTTCTATTTGTAGACTCACTAGTCATTACACCAAATGCCCGCAGAGCACAGCTGTTTTAGGTGGCATCTCCATAGACTGTCACA
n272507:4681584	3.69245	2.73196	3.01463	1.68374	3.17222	4681584	299	NONMMUT022094	1532	| AK083685 | mRNAlike lncRNA | Mus musculus | Mouse noncoding transcript | FANTOM3 | D030066M05 | http://fantom3.gsc.riken.jp/db/annotate/main.cgi?masterid=D030066M05 | -1.2926800 | -0.3550812	NOCODE4.0		chr14	103832352	103833884	-	CGCTCAGTTATGACCAGGCTCCTTACTATCTCTCTGTTGGATTTGAACAACATTGTTACAGTTTCAAGTTTATGTTTGCCCGTCTTCTGTGATAACACGGGTCAGAGGTTGGACTGCAGGCCTCTCAGTGGTATGAAGAGCCAGTCCAATGCCTAGGCTGAGCCAAAAATAATATCAACCTCAAAATGGAGCCTAGATACAGGACAGAGCTCATTTTCATTGGTCACAAGCTTCCCCTTTGGTGGCCTGAACAGTCACATATCTTGATTCTTGTTATGGCTACATCTACCTGCAAGGTG
n272567:5261686	7.40374	6.68005	5.83728	4.99956	6.18447	5261686	199	NONMMUT014671	1745	| AK083633 | mRNAlike lncRNA | Mus musculus | Mouse noncoding transcript | FANTOM3 | D030056M23 | http://fantom3.gsc.riken.jp/db/annotate/main.cgi?masterid=D030056M23 | -1.3258600 | -0.3936076	NOCODE4.0		chr12	74893825	74895570	-	CCTTTGCCAGGATATGACAATGACCCAGACAGAGCTTTAGCTAAACAACCTACAACATTAGTCATAATGAGATTTCTATCTGAACACATGTTTCCGTAGGTGGGGAAGAAACATAATGATTTTGAACTGCGCCGGGCCCTCAATAGGAAGCCGAAGTACCAATTGTTTCCTTTTTGGTGCAGTTCCCACAGTACTCTTT
n272637:4891506	2.28953	3.98069	3.63432	4.74756	4.03436	4891506	196	NONMMUT022387	1394	| AK141736 | mRNAlike lncRNA | Mus musculus | Mouse noncoding transcript | FANTOM3 | D030048C01 | http://fantom3.gsc.riken.jp/db/annotate/main.cgi?masterid=D030048C01 | -1.1575500 | -0.3257140	NOCODE4.0		chr14	117733479	117734873	+	GGAACTGCACCTCCTATGGACCTGACCACTACTGCAGCCTCTATGGGCATCTGCACTCATGTCCCTTACACATAGACATACGCATGTACACATAACAAAGAAAATCCTAAAGTCCAGATCAGAGATGTAATTAAGCAACTGGCCAGTGCCAGTCACTTAAGAGCCTTTGAACTCATGTGGACCTGTGTATTCTCTG
n272739:5239822	4.98138	3.73441	3.86126	2.8086	2.88309	5239822	485	NONMMUT014314	864	| AK050890 | mRNAlike lncRNA | Mus musculus | Mouse noncoding transcript | FANTOM3 | D030030M23 | http://fantom3.gsc.riken.jp/db/annotate/main.cgi?masterid=D030030M23 | -1.0833400 | -0.2410397	NOCODE4.0		chr12	56609612	56610476	-	GCTGGATACTGAAAAAGGCATTGTCAGGCCTAAAAAGGACCTAGACAAAATCCTCACTGTTTCAATTCAGAACTCTGTTTAATCAGTCCCTGGAGACAATGTAGTGGGTGTTAGGCAGGACAATAGTATCTTTTTAAACCTTGTGGCCTTCAGGAAGACAAAGGGCTTGAATTTTATGGGCTTACAACTTCAATTAGAATAGTGCCAATGTGCATGGGAGATTATCAAATTTGTATCATAAAACCCCTTTCTAACAAATGATTGGTAGGGAGGGAGCCCCAACATTGTAAGACATATACTGGGACCTGTAGGAGCTTCTCTGTTAGATTTGGCCGAGCAGATGTGAAAGAAAAAGAGGAAGGGATTTCTAAGGAAGGCCTGGGTTGGGATTTGTAGCTG…
n272822:4760690	5.05288	3.47431	2.68653	2.50995	3.90668	4760690	1870	NONMMUT001250	3541	| AK083458 | mRNAlike lncRNA | Mus musculus | Mouse noncoding transcript | FANTOM3 | D030020C12 | http://fantom3.gsc.riken.jp/db/annotate/main.cgi?masterid=D030020C12 | 1.9899600 | -0.2818354	NOCODE4.0		chr1	63445934	63532849	+	GTGGGCCTGGGCCATCAATTTCCTTATGGTATTTGGTTTTCCCAGCATCAAAGACCGTTTATCCGTGTTCTGTGATGCCACACTTAGAATGGTACAGTGCTAGCCCCTTATGCCGGCGAGGCCAGATCAGAGGTGTGATGCTGAGCTATTCTGAAGCAAGCCCCTCTTCCCAGTCTTTAGAGAGAACAGGGAGGGCTTTTGTTTTGCACTGAGCAGCCTGGACTTTATTTTAAAAATCTTTCATTTCTACTGTCTTCTTTAGATAACTGTATAAGAATGTACTTACTTTCTGTTACTAGAAATACTTACTAGGGAAATCTGTGGTCTAAGTAGTGGCTACGTGATACAACATACAGTTTCCAGATGGAGAAGAAAGTAGTGTTTCATTTTGTATAGGAC…
n272872:4339825	2.03081	4.73115	4.54832	4.27054	1.72083	4339825	425	NONMMUT035945	1858	| AK083437 | mRNAlike lncRNA | Mus musculus | Mouse noncoding transcript | FANTOM3 | D030014E15 | http://fantom3.gsc.riken.jp/db/annotate/main.cgi?masterid=D030014E15 | -0.3145280 | -0.3870402	NOCODE4.0		chr2	18370307	18372165	-	CCAATGAGGAATGGGTCAGTTTACCAGTTGTCAGGCCTTTTCTTACTGCCTTTTCAGACCACTTCATGCTGTTTTACTCCAGCTGTTGCTACACACCTCCCTGAGCTCTCCTTAGTCACATGACTCCCCCCCCCCCTTTTTAACAAATTCCTTTTTTTTTTTTTTCAAGATTTATTTATCTTATGTATACGAGTACATAGCTGTCTTCAGACACACCAGAAGAGGGCATCAGATCCCATTACAGATGGTTGTGAGCCACCATGTGGTTGCTGGGAACTGAACTCAGGAGCTCTAGAGAAGCAGTCAGTGCTCTTAACCACTGAGCTATTTCTCCAGCCCTCTCTCTCTTTTTTTAACAGGGTCTCCCTTACTCTTACTAGTTGGTATGAGCATATGGAA…
n272929:5575015	1.65311	2.17981	2.97426	3.86551	3.07189	5575015	219	NONMMUT012277	2612	| AK083403 | mRNAlike lncRNA | Mus musculus | Mouse noncoding transcript | FANTOM3 | D030002E05 | http://fantom3.gsc.riken.jp/db/annotate/main.cgi?masterid=D030002E05 | -1.3138100 | -0.4152058	NOCODE4.0		chr11	104438348	104440951	-	CTGGAGCATTTTCCGTGACCTATTAATAAAACCGCACTTGAGGGTGTTAGCTGTACAACTCTTAGGGGTTAGAATTTGGTACCTTAAAGATTGAGAAACCCGAATCCTGCAGTCCCCAAAGTTAAGAGAAATCTCGCTAGTCCTCCAACCTAGCTTTCCTCCCCTCCATTCACAATCCTGGTGTTGCCATATCCTTCGTCACGTGGCTAGCAATCATTG
n273015:4978938	2.37498	4.38633	2.88764	4.59994	2.05422	4978938	201	NONMMUT004764	1813	| AK050562 | mRNAlike lncRNA | Mus musculus | Mouse noncoding transcript | FANTOM3 | C820018L10 | http://fantom3.gsc.riken.jp/db/annotate/main.cgi?masterid=C820018L10 | -1.2185300 | -0.3198446	NOCODE4.0		chr10	13551307	13553120	-	ACCACTATCCTCTGATCTATGTGTGTGTGTGTATAAATATATCATAATATGACTTAAAATATTAGGACATTTGTAAAACAGTAACCACATTCTGCATATCTCTGAGGTATAGCACAAATGAATAATAGTTCATATTTTATAGGAAATACTTTATAGATACAATGTGTTTTATATTACCTCCAGTCTCTAATATCTAAGGTA
n273137:5078274	2.06574	2.41796	2.81977	4.1235	3.81882	5078274	328	NONMMUT026928	4244	| AK149513 | mRNAlike lncRNA | Mus musculus | Mouse noncoding transcript | FANTOM3 | C730027M01 | http://fantom3.gsc.riken.jp/db/annotate/main.cgi?masterid=C730027M01 | -1.2023200 | -0.3911762	NOCODE4.0		chr16	52427601	52431842	-	GTCTAAACGTTCTAGGTGTCATTTCATTTCTGAGTAGCAAATTAAAGGATTGCCATTCAAGTATTTTAACTGAATTTTAAATTTTATTGCTTAGGGTGTTAAGGAATCCAGAGAAATGGACTAATCCCACATAATATATCATTTACACTTATATAATGAGTTTACTAATGCCATTTTGAAACAGACATTTGAAGCTATGATACAGATAACAGAAGAATGTTAAAAGATCTTACCCATGTTAGCAGAGTTGGCAAAAGGCTCGGAATGCATAGAGATGCATAGAACGTGTCTATGTGGAGGGGTTGAGGCGTCCATAGTAAAGCAGAGA
n273149:5262306	2.15725	4.06444	2.71118	4.35801	2.22107	5262306	645	NONMMUT044377	1662	| AK050194 | mRNAlike lncRNA | Mus musculus | Mouse noncoding transcript | FANTOM3 | C730026D23 | http://fantom3.gsc.riken.jp/db/annotate/main.cgi?masterid=C730026D23 | -1.1359700 | -0.3476735	NOCODE4.0		chr3	98758587	98760249	-	ACAGATTGGCAGACTTACTTTGAGGTTAAGCAGAGCAAAAAGTCAGAGGCTGAGAAAGAAACTAGATTGAATCATACAACTTTGTGAAGAGTTTGAGTCAGAACTAGCCACCAAGAGCTCAGAAATCGCAAGGAAGGGTTGAGATTGTTCAGACCCATGTATAAGAGGAAGAACACATTCTAGGCATTGAGTAGATTTTAGGAAGGCTAGAAGCTACCAGGGCAAGGCCTGAGTAAGCAAACTGAGGCATGAGGCCTCAGAGACAACAAAGGCAGCAGGCAAATAACAGGTATGTTTTTAAAGACAGATTGTGCTCAAAATTCAAGCAAAAGTCAGACCCCTTTGGACCAAAACTGCAATGACCATGAAGTGGTTTTACTGACAAAAAGCACTTCCCTC…
n273194:4426922	4.01727	4.00607	4.76668	6.22364	5.60455	4426922	855	NONMMUT060994	2164	| AK149443 | mRNAlike lncRNA | Mus musculus | Mouse noncoding transcript | FANTOM3 | C730013D23 | http://fantom3.gsc.riken.jp/db/annotate/main.cgi?masterid=C730013D23 | -0.6974640 | -0.3486157	NOCODE4.0		chr7	43524215	43526379	-	GGCTCTCAGTACTCCTACAGACAGCTCACAACCATCTCTAACTCAATTTTCAAGTGATCTAATGCCCAGTTCTGGACTCCATAGGCACCTGCACACATATGACATTCACAGATATTTGAAATAACAATGATAATGAATAGTTTTAAACAGAATATAAAGTTGAGTGTGGATTTTTGAGGTCGGTAAAGAATTGTGGTGAAATGTTGGTGGGGATCACATTGAATCTGTAGATTGTTTTTGGTAAGGTGTCCATTTTTACTGTGTTAATTTTACTGATCCATGAGTATGGACGATCTTTCCATCTTCTGATATCTTCTTCACTTTCTTCCTTCAATGACTCGATGTTTTTTAAATACTTGTTTACAGTTACACCAAGATATTTTGAATTATTTGTAAGTA…
n273194:5592802	2.61816	3.95712	5.45572	6.82233	5.85655	5592802	306	NONMMUT060994	2164	| AK149443 | mRNAlike lncRNA | Mus musculus | Mouse noncoding transcript | FANTOM3 | C730013D23 | http://fantom3.gsc.riken.jp/db/annotate/main.cgi?masterid=C730013D23 | -0.6974640 | -0.3486157	NOCODE4.0		chr7	43524215	43526379	-	CTCCCTGGGACTGGATTTAAGGACAGTTGTGACCTACCATGTGGGTACCGGAAATCAAACCCGAGTCCTCTAGGAGAGCAGCCAGTAAATTTAGCTACTAAGCTATTTCTCCAGCCTCTCCATTCATGCTTTTCTTAGCTGTTTTCTCTAATCTTAAGTGCCATTAGATTTGGTTTAAAAAGAAAATACAATCTGTGGAATACTGGTTATTCAGGAATAGAAAGAATAGAAGGGTTTTAAATTGAGATTTTACATTCTTGTCTTACATCATACAGCTAAAATGCGTCCTAACTCTACAATCATTTA
n273220:4585579	2.49668	3.76055	4.55583	5.1586	3.52389	4585579	447	NONMMUT026999	1726	| AK149401 | mRNAlike lncRNA | Mus musculus | Mouse noncoding transcript | FANTOM3 | C730006C12 | http://fantom3.gsc.riken.jp/db/annotate/main.cgi?masterid=C730006C12 | 0.8435630 | -0.3976901	NOCODE4.0		chr16	57173334	57173750	+	TGGCCATTAGACTTTCCTCGGTTGAGAATTCTTTGTTTAGCTCTGTGTCCCATTTCTTTTAATAGGGTTATTTGATTCTCTGGAGTCTAACTTCTTGAGTTCTTTGTATATATTGGATATTAGCCCTCTATCGGATGTAGGATTGGTAAAGATCTTTTCCCGATCTGTTAGTTGCCATTTTGTCCTATTGACAGTGCCCTTTGCCTTACAGCTGCTTTGCAGTTTTCTGAGTCCCATTTGTCGATTGTTGTTCTTAGAGCATAAGCTATTGGTGTTCCCTTCAGGAAGTTTCCCCTGTGCTGTTTATTAAGTCAGAAACTGGCAAAGGGGAACACTGCCTTCCCTGCCTCGAGAAAGGTGCTTCTCACTGACATGCCAGGCCACAGTTGTGACATCTTT…
n273244:4746628	5.05981	1.87181	3.92349	2.29907	2.88322	4746628	212	NONMMUT011050	3225	| AK141619 | mRNAlike lncRNA | Mus musculus | Mouse noncoding transcript | FANTOM3 | C630045O09 | http://fantom3.gsc.riken.jp/db/annotate/main.cgi?masterid=C630045O09 | -0.1274840 | -0.2873110	NOCODE4.0		chr11	81830723	81833944	-	GACATTTTGCTTCTGGGTTGGAAGAATTCTTACTGTTAAAACGCCCATGTTTCACAGAATAACCTATAGACTCCATATGATCTATATTAAAAAAAATCCAGCTATAGGGGACCCAGTGTCCTTTTCTGACCTCCACAGGCACAGGCATACACACACACACACACACACACACACACACACACACACACACACACGAAATAGTCATCTCAGAG
n273348:4779376	7.87175	7.48952	6.14713	5.13474	7.21467	4779376	566	NONMMUT032142	4026	| AK141538 | mRNAlike lncRNA | Mus musculus | Mouse noncoding transcript | FANTOM3 | C630015F02 | http://fantom3.gsc.riken.jp/db/annotate/main.cgi?masterid=C630015F02 | -1.1106300 | -0.3344685	NOCODE4.0		chr18	40531155	40535175	+	ATGTGGAACCAGAAACGAGCTCTTAGTTGTCCTTTGTCTTTTATTTACTTGGTCCCATGTGCTGAGAATCTTAAGATACAACAAGAACCAGCTACGTGTGAGTAGCTCACAGGCTTTGGGAATCATTGATCCCAAACCAGGTTTTTTTGTTTTGTTTTGTTTTGTTTTGTTTACTCTCATTTTTCTGCCTCCTCCCCTTGACCAAGAATGGACAGTTGAAGGAGATATAACCCGGTGGCTTATGTTAAGAAATTATCCTTTTCCCTTTCCTTTTGTTTGTTTATGGGGTTGAGGGGAGAATGGCAAATTTGTATGATTTTTCACTAAAATCTCTATGTGCCAGGTTCTATTGACTTTGTATGCATGAGCGTTTCTGACACAAGCACAGTATATGTCTGT…
n273361:4505872	4.84087	2.06714	2.18233	1.59163	2.9037	4505872	140	NONMMUT009312	3075	| AK049941 | mRNAlike lncRNA | Mus musculus | Mouse noncoding transcript | FANTOM3 | C630013G10 | http://fantom3.gsc.riken.jp/db/annotate/main.cgi?masterid=C630013G10 | -1.5906100 | -0.3609475	NOCODE4.0		chr11	36834190	36837265	-	TACTCGGACAACCAAAGGACAAATGCTGTTACTTCATTGTGTTATTGCTATATTGTGTTTTTTTTTTTTTATGATTTTCTCTTCTAGCTTTGGAAAATAGGAGTCCCATATGTTTACCCAAGACTGTGCAGGGATATTTA
n273424:5099335	8.21783	7.00413	6.34418	5.381	6.8225	5099335	564	NONMMUT021928	2937	| AK049797 | mRNAlike lncRNA | Mus musculus | Mouse noncoding transcript | FANTOM3 | C530050I23 | http://fantom3.gsc.riken.jp/db/annotate/main.cgi?masterid=C530050I23 | -1.2396100 | -0.4225715	NOCODE4.0		chr14	93880734	93883672	-	TGCCAGCAAGGTCTAAGCCAAAATCTTTTAATTTTTTTTCCATAGTTATTGAACTTAAATATGGCACAAGGACACAAATGCTAGTCAGATGTGTTTCAGCAGAGTTTTTGAAAGCATCTTCTGACGAAGCTTGGTTTATCATAAAGACATTTGTTTATATATGACATAGTCTTGCTGTCAGTATGCTGAGTAACTCACAAACTGAAACTATTGTATGTTTCAGACACACCTTTTGATCATGAAGCATTTTGTAGCTTTCTTGTACACATTCTAAGGTTGAAAGGTACCTGTAACTAACTCCCATGGAAAATAGCTATTGAAAAGGTAATCTTTATGTCTTTCAGAGACTTTCATAACAAAAAAAAAACCCTAAAAATATAGTAGTCACTTTGGAGGAAA…
n273424:5269748	8.3455	7.63344	6.17337	5.75952	6.53616	5269748	409	NONMMUT021928	2937	| AK049797 | mRNAlike lncRNA | Mus musculus | Mouse noncoding transcript | FANTOM3 | C530050I23 | http://fantom3.gsc.riken.jp/db/annotate/main.cgi?masterid=C530050I23 | -1.2396100 | -0.4225715	NOCODE4.0		chr14	93880734	93883672	-	CCTCCTCCCTTGATAGCTTCTGTTGGTGTGATGTGGTGTGGCCCATATTTAGGATGTAAAATATAACCCCTTGGAGACTGATGTAGACTTCACAGGTAAAAATGAGTTGGTCACTCATCTTGGCATCCACTTCTCTTGAACTTTTAACTGGGACGTTTGATATTCTGGTTTCTTTCCCCACTGTATAGTTCGATGAGGTTCCTTATAAATTGTATCATTAATTGCTAGTCATATTAAGGGTAATAGATTTTTGAAAAAATGTCCACTATATTAAACAGCCTTTTTAGGGTGAAATTATGTACATAATATTTATAAACATGCAGGTAATTTCTATAGTTAGAATGTTCTTATAACTACCCAAACTGTGCTTTCTCATCTCTCATGGTTCTAACCACGTAT…
n273430:5583907	3.38207	4.89559	4.92756	5.52097	4.96756	5583907	159	NONMMUT053008	921	| AK049785 | mRNAlike lncRNA | Mus musculus | Mouse noncoding transcript | FANTOM3 | C530049N02 | http://fantom3.gsc.riken.jp/db/annotate/main.cgi?masterid=C530049N02 | -1.0418000 | -0.3562258	NOCODE4.0		chr5	88650496	88651414	+	GTATATCTGGATTGTCTAAGACTTGGGAAAACATGAGTCTATGCAGGTTTAGAATTCTGGGGTAAATTCTGGAGGAAAAATGGCAACAAATCCTGTCTCCTGAAAAGGGTTAAAACCTGGGAAAGGCATTATGATTTCAGAAGTCTAACCTGCTGGTGA
n273505:4455737	1.57101	2.99036	3.21976	3.87505	2.16791	4455737	87	NONMMUT010110	501	| AK083022 | mRNAlike lncRNA | Mus musculus | Mouse noncoding transcript | FANTOM3 | C530034D05 | http://fantom3.gsc.riken.jp/db/annotate/main.cgi?masterid=C530034D05 | -0.5246400 | -0.3110165	NOCODE4.0		chr11	61835197	61835698	-	TTTTTCCTAGGTATGACCAATGTCAAACAAAACTTATTTTTTGGTCTGTAAAGGGCATTTCCATTTGTTGAGCACCTCTTTTGTTGT
n273517:4432829	2.09937	2.88935	2.53277	4.57383	2.38197	4432829	79	NONMMUT044460	1856	| AK083000 | mRNAlike lncRNA | Mus musculus | Mouse noncoding transcript | FANTOM3 | C530030I03 | http://fantom3.gsc.riken.jp/db/annotate/main.cgi?masterid=C530030I03 | -0.7809140 | -0.2077255	NOCODE4.0		chr3	101377082	101379540	+	CGCTCGCGTCTCCATTCTAGGTTTCTTGCACTTACAGGATTTATCCGTGGAGGTTGTCTCTGAATTATCTGCACCCTTA
n273557:4827495	6.24508	5.69643	4.73412	4.10514	5.68914	4827495	437	NONMMUT015768	2011	| AK049674 | mRNAlike lncRNA | Mus musculus | Mouse noncoding transcript | FANTOM3 | C530021M01 | http://fantom3.gsc.riken.jp/db/annotate/main.cgi?masterid=C530021M01 | -0.7653800 | -0.3333525	NOCODE4.0		chr12	109640340	109642351	+	AGGTCTGATTTCTTCGCAGTGTTCATTGGATCTTTTAAGTCTACAAACCAATGATACAAATGCAATATGAAACAATTGCTAGGAAGCTAATTGGCATATTTTACTCACAGCCCATTTTATTTTCGCACAGCAGTGTACTTAAGTTTTCTACTTAATAATCTCAGTCTGCATGTCCAATATGGCTGCCACCATACACACATGGCTGCTTATATATAAAGTAATTACTGTGAAGTGAATTGTAAAATTCAATTTCTCTGTTGCAGTGCTCACACTGCAAGTTCTCAGTAGCTACCTGAGCCTTTGGGGCACTGTGTTAGGATCAGGTTTCTATTATTCTGCAAAGAGCTATTGGACAGCTCTTCACAGAGAAGGCTGCACACAGGAAGAGGGAAGAGAGAC…
n273570:4952907	6.24428	5.31008	5.5911	3.64029	5.35952	4952907	300	NONMMUT059651	4315	| AK049654 | mRNAlike lncRNA | Mus musculus | Mouse noncoding transcript | FANTOM3 | C530015J03 | http://fantom3.gsc.riken.jp/db/annotate/main.cgi?masterid=C530015J03 | -0.8726150 | -0.3969776	NOCODE4.0		chr6	149545881	149550196	+	TCCACTAAGAGCCATGGCTGGATTAGACCTTCCACCTTGAAAATAGGCTTTAATAAGTCATGCTTTATGAAACTTGTGTGACACTGCTCTTTTCACAGAGTATGTGGTAATCAAGGAAACCTCTCCTAGAGCCTCATCCTGGCAGGCTGTATACTCCACAGCTCAGACTGTACTCATATCCTAAATGATATCCATAGTATCTTGTGGGATGATGGAAGAGCCAAAACCTAATGTTCAAACTCATTCCATTCAGGTTACTCTCACCGATCTCAAGCAGCCATTACTCGGTTTCTGGACTCC
n273570:5605391	4.05424	2.47181	2.69103	1.67331	3.74091	5605391	270	NONMMUT059651	4315	| AK049654 | mRNAlike lncRNA | Mus musculus | Mouse noncoding transcript | FANTOM3 | C530015J03 | http://fantom3.gsc.riken.jp/db/annotate/main.cgi?masterid=C530015J03 | -0.8726150 | -0.3969776	NOCODE4.0		chr6	149545881	149550196	+	GGAAATGGATGCATTCATCTGCTTAATATACAGTGGTGACAGCTAAAAGCCAGTTCATTAAAAATGCCTTCTGTTAGACTAAACTTCTTTTTCATACATAAAGCCAGGGTAAGTGCTATGTCTGAATCTTGACAAACAACCAGCTGTTTAAAATTTTTTAAGGCAAATAGAGAATTAGTTATACAATTTTTTACATTCATAACTGGTTAAAAAATTGAAAATCATCCATTAAGATGTATGAAATAGCCTTATTGTTACCAGTCTAAAATG
n273595:5395403	5.48636	4.85935	4.16779	3.44945	5.33491	5395403	459	NONMMUT062718	2323	| AK049623 | mRNAlike lncRNA | Mus musculus | Mouse noncoding transcript | FANTOM3 | C530008G20 | http://fantom3.gsc.riken.jp/db/annotate/main.cgi?masterid=C530008G20 | -1.1201900 | -0.3189198	NOCODE4.0		chr7	92408183	92410506	+	CCAGGCGTCTTCAATGTGTTCTCTTTTGTGTATGACTATAATATTTCCAATGACCAGGTTTTGTGTAATTTTTTTTCCTTTTTATCTAGTCTCTTCTTTAGTCTCTCAACCATATTTTTACCTTTATTGAAATCTTCACTTCTAAGATTTCTATTTGGTTCTTTTATTTAAAAAAAAAGTCTATTGCTCTGCCAAATTTCCCTTTTATATTCTGTATTATCTTTCCAATTCCATTCAATTGCTTATATGTACTGTCTCTTAGATCTCATTAAGATTTTTATATGCCTTCTTTTAAATTGGGCTTTAATTCCTTTTTAAATTCTTTTTTCATCAGTGAAGCTGGGTAAGCGGCTCAGTTGTTTAGAGCCTTTCTTGTTCTTCCAGAGGATCAGAGTTCAG…
n273615:4940396	3.06935	6.55573	6.27385	6.09812	3.87587	4940396	181	NONMMUT048569	2722	| AK164075 | mRNAlike lncRNA | Mus musculus | Mouse noncoding transcript | FANTOM3 | C430050K03 | http://fantom3.gsc.riken.jp/db/annotate/main.cgi?masterid=C430050K03 | 0.9874200 | -0.3641170	NOCODE4.0		chr4	108084381	108087103	-	TACAATTACATCCTCTTGAGCATGCCTGAAATGTACACAACTGACCATCAAGTGCTGACAAGGAGGCGAAGCAACTCAAAGTCCACACTCTTAGGAACATGGCATGCTTTAGAAATGGAAAGGAACCCTTCAAACTCACCAACTAGTTTTCTGTTTTTCTTGCTGCCCATCTATTTAAACA
n273720:4490477	2.52188	1.94952	2.89441	5.23407	4.50061	4490477	1108	NONMMUT034096	2450	| AK049455 | mRNAlike lncRNA | Mus musculus | Mouse noncoding transcript | FANTOM3 | C430014K04 | http://fantom3.gsc.riken.jp/db/annotate/main.cgi?masterid=C430014K04 | -1.1364900 | -0.3319694	NOCODE4.0		chr19	20388225	20390673	-	GGTGCCTCGGTAGTATGACTCCTGAGAAATCAATGTCCCTAACACTGAGCAGGTACTGTGCTTTGCTCGCTGCAGCTCAGTCCTGTTTCAGCTGATTCATATGTTGTAAAATGTTGGTTTCCTGCTTCTGAAATGGCTTCTTCCACATTTCAGAAGTTATGTGGTTACCAGAGCCCAGAGACACACCTATACCTCCTAGTTCCCTGATAGGAGACCGCTGCTCTTGAGACTATAGCAACACTCATAAGGAGCCAGCTAAAGTCAGATGCTTGTTAAATACTTTCTCAATCAAAAACTTCTGCAACGTTGATGCCTGAACAACGTTGGACAGGCTGGACAGGCTCACTTATTTCCCTCTAGACCTATTAAATTGTTACATATTTAAAGTCAGAGCAAAAG…
n273764:5108796	4.18681	2.57047	2.21036	1.61988	3.63944	5108796	424	NONMMUT067800	4377	| AK141258 | mRNAlike lncRNA | Mus musculus | Mouse noncoding transcript | FANTOM3 | C430002C22 | http://fantom3.gsc.riken.jp/db/annotate/main.cgi?masterid=C430002C22 | -0.9193080 | -0.2794248	NOCODE4.0		chr8	127171558	127179564	+	GTCCCATGTCAGGTCCCACGTTCTGTTTGCCTGGGAGAAACACAAGCTAGGATACTACCAGTTTGCATTTTATAAATAAAACATACAAAGAGATCAATGGGAACTTAAAAGATACAAAGATACATAAAAACATATACTTTGAAAGAGCCAGGCAGGCAGCCCTAAAAGATACATTGTAATACTGTATTTATGTTAAGACTCCATTTTTTTTAAAAAATAAGAATGGTGGTTGTATACATGGAGCTAAGTTATTTTTCCTCTGAATGGACCCATTTTTAAATTGTCGCCATAAAATGGTTAAGGTTGAATGAATATTTTAAAGCACATGAAACCTGGTCATAAGGGAAGTGAGTTTTTTTTTTTATTAAAAGTGTTTTTTAAAAAAATATATAACATGCT…
n273896:5516246	7.70095	6.05527	6.61192	5.22009	6.3318	5516246	516	NONMMUT021910	4186	| AK049079 | mRNAlike lncRNA | Mus musculus | Mouse noncoding transcript | FANTOM3 | C230097E05 | http://fantom3.gsc.riken.jp/db/annotate/main.cgi?masterid=C230097E05 | -0.2112820 | -0.3507555	NOCODE4.0		chr14	93618845	93623029	-	ACCTGTCTGTGATTATACTGTCTTCAACTTTTCCTAATGAATATATTTTAGTGTGTCTGAACAAAGTTTCTATGTTCCAAGACAATGCACATTTTCAACTGTCCTCATGTATATATATGAATATATGCATTTATACATGAATATGTATTCATACATATATGCATTTATGCATATATATGCACACACATACACACACAAACACACACACACACACACACACATATATATATATACACATACACATACATATTTCAGGTAGCCACTGTTGTTAGTATCCTACAGAACAACTGATATGTCCTCTTTGATTTGGCTTGAATCTTTAGTTTTGAAATTGTTTTCATGTACTCATTTTCTTCAACATCACTAGCATTTTCATAGACCAGTACTTGTACTTGTTAT…
n273902:5412406	5.88214	5.00002	4.23511	3.79145	4.88587	5412406	556	NONMMUT051351	2583	| AK082722 | mRNAlike lncRNA | Mus musculus | Mouse noncoding transcript | FANTOM3 | C230096N06 | http://fantom3.gsc.riken.jp/db/annotate/main.cgi?masterid=C230096N06 | 0.6202460 | -0.3283838	NOCODE4.0		chr5	19273175	19275755	+	TTACCCACTGTGAAAGGGCTTTCTAAACTCTTGTTCAATTTACACTGAAATAATTCACTTTACTCATGTTCTCAAGCTCATGTTTGTATAGTAGTGTTTGTTTTAATAACATATCAGGGTTCAAAAATGGTGGGTCATCATAGCAGTCAATTTAATGTAAAGAAAATATGAAATGAAGAATATATGAAAAATAATGAAATTTCAAGCTTAAATCTCTAAACATTACTGTCTCTGAGAATATTACTTACTCTTTGAACCCTCTATTAAACTCTGGTCTATGATGATCTAGCAATTGTTTTGATTACTGCTACAAGTCCATCAGAATAATATATAGTTAGCTGTGCTAAACTGTGTGTTTCTGTCAGGGTTGTGTCCTAACAGTTTGCTCTTTCCTATAGA…
n273908:4343856	6.71609	4.93539	3.31495	3.15612	5.49983	4343856	82	NONMMUT009579	4007	| AK049060 | mRNAlike lncRNA | Mus musculus | Mouse noncoding transcript | FANTOM3 | C230096B09 | http://fantom3.gsc.riken.jp/db/annotate/main.cgi?masterid=C230096B09 | -0.0095019 | -0.2313069	NOCODE4.0		chr11	50120669	50124676	+	TGAAGGGATTCACTCAGAATAGCTCTCCAGATATCCAAGTTGACCCCCTTCTCCTGAAAATTGGGGCCACCTTCAACTCAGA
n273908:4810488	7.07724	6.48328	5.86148	4.7284	5.51132	4810488	2166	NONMMUT009579	4007	| AK049060 | mRNAlike lncRNA | Mus musculus | Mouse noncoding transcript | FANTOM3 | C230096B09 | http://fantom3.gsc.riken.jp/db/annotate/main.cgi?masterid=C230096B09 | -0.0095019 | -0.2313069	NOCODE4.0		chr11	50120669	50124676	+	TGCTGACCCTGACTTACTAACTGGCTTGTCTGGTGGGCTTTGTAAGCCTTCCTGCTCTTCCTGCCCTTCACCTCCATGTTCTCCCTCGTCTATGCACTAAATGACACGAAACTGAGGGGGGAAAGCCACTGTCCCTTTGCTGTTCACCTTCGCTCTGGGGGGTCCTTGTCCTGCTGCAAGAAAACAAGACTGTGATTTCACATCAGGGGTCTTCCTAACAAGGGCTCACTGCTCATAAATGTCAAGAAAGTAAACGGCTGAACTTAAAACTGGCATTTCGAAGGGAAAGGCAAGACTGTGGGGTCAGTTTTGTCACCAGCCCTTTTTGTCTTTTTCTTTTTTGGTTTTCAAAATGGGGATTTTCTGTGTAGCCCTGGCTGCCCTAGGACTCACTCTGTA…
n274088:4990912	6.0628	3.34549	3.447	1.50164	4.119	4990912	507	NONMMUT061423	1525	| AK048846 | mRNAlike lncRNA | Mus musculus | Mouse noncoding transcript | FANTOM3 | C230074P11 | http://fantom3.gsc.riken.jp/db/annotate/main.cgi?masterid=C230074P11 | -1.2245600 | -0.4266832	NOCODE4.0		chr7	59288631	59290156	-	GACAGCTCATGATCCTGAGTCATCAGTGATAAGCAAATTTATACTAAGGTAAAATTTTATTTCACACTCCAAGACAACATGACCAAAGATTAAAAGAGATACAGAATACGTTCTAGCACTGCTTGTCATCTTAGGTAAAATGGCAGTATCATTTTACAAAAGCATTCTTGCAGTGCTTCTTAAGGTTAAAAATGTTATTTACTTCACAACCACAATCCTCCAAAGTGCTTCTTCAGGAGAAATGAAAACACTTCAACACTAAGAATGAAAACTTTATTTGTAACAGCCCCACTGTCATGATAATTCTATTGCCAATAACAAAAGGATAATAATCAAAATGCATACATTAATCATAATCAATCTAAAACATTATTTTGCCATATTGTAGAGATAATACTA…
n274089:4426180	6.20716	3.34783	3.46017	3.18028	4.72354	4426180	366	NONMMUT026641	3879	| AK082642 | mRNAlike lncRNA | Mus musculus | Mouse noncoding transcript | FANTOM3 | C230075A15 | http://fantom3.gsc.riken.jp/db/annotate/main.cgi?masterid=C230075A15 | -1.1758300 | -0.3514378	NOCODE4.0		chr16	41653334	41657213	+	TGAGATCCTCACCAGAGTAAGCTTTTCTTCAAAAGAGTTGAAGGCCCATTTACTGAGCCATTAGCTTTGACTGAGACCTTTGCTGATAAATAAGATGGAAGGTAGTATTTTAGATTTAAAGTTCGCTAAGTGGAGTACATACTTCCTGTAAATAGATATATGCCTACAGATTAATACATGTACAAAGTGAACCTACTTCTAAGGATACACTGTACATGCTTTTTAAGAAGATAATTGTAGTAAAAAAAACCAGTGCAATATTTTATGAACTTCCATGTTGTCAGGAGCCATGTGAGAGCTGGGATAAAACCCAGGTACTCTGAAAGATCAGTAACTCTCTTAATGGCTGAGTCACTTCTCTGGATC
n274089:4736953	6.18233	2.84893	3.133	2.77107	4.3254	4736953	84	NONMMUT026641	3879	| AK082642 | mRNAlike lncRNA | Mus musculus | Mouse noncoding transcript | FANTOM3 | C230075A15 | http://fantom3.gsc.riken.jp/db/annotate/main.cgi?masterid=C230075A15 | -1.1758300 | -0.3514378	NOCODE4.0		chr16	41653334	41657213	+	CTATGAACCGACCTTGACTTTTGCAAGCCATGTTACGTCCTGCTCAATCTGTGCCTTGGTCCCATGGGCCAAAAGGTGCTTGCC
n274105:5481554	6.92622	5.74841	5.31132	4.70514	5.88921	5481554	155	NONMMUT021286	645	| AK048830 | mRNAlike lncRNA | Mus musculus | Mouse noncoding transcript | FANTOM3 | C230073K07 | http://fantom3.gsc.riken.jp/db/annotate/main.cgi?masterid=C230073K07 | -1.2352600 | -0.2025061	NOCODE4.0		chr14	64587444	64588089	+	CGGCAATTCGGGCTGAGGACGACAAGCAGAAGGTGTGCAAGTGCCCCCGAGCTCCCCACTCCATTGACCGAAGCTCAAGAAACCGGGAGTGGGCTAGCGGCGGTATTGCACGGAGGGGACTGAGAAAAAGAGGACTGGAGACCATGAAGCTATTC
n274159:4595296	4.85516	3.15982	3.42973	2.82845	3.71362	4595296	834	NONMMUT054824	1965	| AK082603 | mRNAlike lncRNA | Mus musculus | Mouse noncoding transcript | FANTOM3 | C230068I06 | http://fantom3.gsc.riken.jp/db/annotate/main.cgi?masterid=C230068I06 | 0.7962490 | -0.2293588	NOCODE4.0		chr5	135370576	135372541	+	TAAGAGCTGAACATCGTGCCCGGGTGCCTTCATTTTCCTCTGTGTCCAGGTTCTCAAGGAAGTAGGAGTCTGTTAGAGGGGAGACTAGGTGTGTGTATGTGGGATAATCACTGCTTTCTCTGGATGTTTTTCCTACTTTCCCAACAGAATTTTCTTTGTTTTTAAGAAAGATGTTGCTTTTAAGTGGTGCACATGTCTGTGCATGGGTGAGGGCATGTGCCTGAGGAGGACATTGGACTGCTGGACACGGTGCTAGGAACTGCACGTAGGTCCTCTGCGAGAGCAGTGTGTCTTCCTAACTGCTGAGCCACGTCTCTGGCCCTGGCAGCAGTTCTCTGCAGTCTCTTCTGAGACCTGTTTTTTTTTTTCCCCTGAACCCTGGTGTTCTTGCGGTTCTTG…
n274191:4494737	4.47393	2.36053	3.37138	2.26847	3.00776	4494737	233	NONMMUT069032	2082	| AK082557 | mRNAlike lncRNA | Mus musculus | Mouse noncoding transcript | FANTOM3 | C230063K18 | http://fantom3.gsc.riken.jp/db/annotate/main.cgi?masterid=C230063K18 | -1.2437700 | -0.4087647	NOCODE4.0		chr9	49550221	49551990	-	TAAGTTACTCAGCATAGGGGAGTTGAATGTGTCTTCTGGTATTGATACATATATCTATAGGGTTTAGGATGCCTTCAACTTTAAATTAGGCATTTTAACATGCATAAGGTGGGAGGTGGTGAACATCAACTAACATCTGAATTAAATATGGGGGATGGATAATCTTATCCTTGAAAGGGGGCCTTGAAATTTTTTTCCTGAATTAGAAAGGAACTGCATGTGCACGGAATGCA
n274191:5372885	4.47475	2.84765	3.2769	1.99169	3.56415	5372885	178	NONMMUT069032	2082	| AK082557 | mRNAlike lncRNA | Mus musculus | Mouse noncoding transcript | FANTOM3 | C230063K18 | http://fantom3.gsc.riken.jp/db/annotate/main.cgi?masterid=C230063K18 | -1.2437700 | -0.4087647	NOCODE4.0		chr9	49550221	49551990	-	TAGCTTACCTGACCACTAGCCAGTCTCTAGCTCTGAAAACATCTCAGTTTTAACTCACCATCACAGTTAATAACCAGACTTGCTAACCTAGTGAGCACTTTAGGTGGATTAAAGATTAGGTCCATAGCAGTAGACATCACCTAGCAATAGTGTCATTTCTTAGGATGAGCAAGCTAGC
n274208:5078247	5.25253	3.96124	2.98152	2.19086	3.47681	5078247	132	NONMMUT001318	588	| AK021165 | mRNAlike lncRNA | Mus musculus | Mouse noncoding transcript | FANTOM3 | C230061B10 | http://fantom3.gsc.riken.jp/db/annotate/main.cgi?masterid=C230061B10 | -1.5906100 | -0.2409143	NOCODE4.0		chr1	66673729	66674316	+	CTAAAGGAAGCCTATTGTTGTTGTTGTGTTTTCTAACTACCAGTATGCTGTTTCTATTCTTCCTTTTCCCCAGGAAAGTCATCAGCTGAATTGGATCCAAATGGTTTTAACTGGGCGTTGATTTGGGAAATA
n274218:5223225	5.00929	4.59818	3.38537	3.00498	4.09107	5223225	449	NONMMUT068282	1734	| AK082527 | mRNAlike lncRNA | Mus musculus | Mouse noncoding transcript | FANTOM3 | C230059F15 | http://fantom3.gsc.riken.jp/db/annotate/main.cgi?masterid=C230059F15 | -0.4565350 | -0.1575078	NOCODE4.0		chr9	21034289	21037782	-	ATTGAGCACGCTATCCACTGGACTACATCCCAGCCCTCACGGCACTTTTCTAGCGGGCTCAGTCCTCTTCATTCTGCGCTGTCCTCACTCACATTCCACACCCACAGTGACCGTCCGTGAATCCGTGCCATGCGCATTGGTGGCCACACAGCGGTAGGTCCCCGCATCCTCTCGGGACACCTGTAGCCTCTCCAGCCTGGCGGCACCCTCCCTGGAGCAATGCACCCGTGGAGAGGGGCGGCCCCTGGCACTGCAGGCCAGCGCGGTAGCCTCAGCTCCTTCCAGCCAGGTCTGGTGACTCGGGCAACTGGATTCATCCATCTGTGGCGGCGCTGCAGATCAGCCACCATAAGGAGGGACGTCAGGGAAGGCAAGGATCCTGGGACACCCGGTACTTTC…
n274342:4755633	6.36621	5.76107	4.37825	3.58945	5.68851	4755633	332	NONMMUT067118	2606	| AK082371 | mRNAlike lncRNA | Mus musculus | Mouse noncoding transcript | FANTOM3 | C230042C16 | http://fantom3.gsc.riken.jp/db/annotate/main.cgi?masterid=C230042C16 | -1.3009600 | -0.3370101	NOCODE4.0		chr8	109244852	109247452	-	TTGGTGCTATCGAAGAGTGCGTTGCTAAAGAGCAGACGGCATCATCCGCTGCTTAAGGAGGCCTGATAATTGCGGTGCTGGTTGGTTCTCAGGGTAATGATGTCTTCTGGGCTTCTCTGACATTTCGGAGTGCTGGCATTAGGAGTCTCCATTCAGTGCATGTTTACGATAGACAGAGGTAGGCAGACAGCGACTGAGTCTGTTGGGTGGATTCAGAGCTAGTAACATATTTGTACCACTTCTCAGGTTTCAAAGGGGTAGCAGAGGGTGAAGCAAGAAGTTAGATGGAAGATTTTGTTGATTTTCTTGGCCAGGTGGATAGTCCAAAGTAC
n274343:5351838	6.00828	4.27605	3.79855	3.35643	5.16461	5351838	365	NONMMUT023781	2684	| AK163910 | mRNAlike lncRNA | Mus musculus | Mouse noncoding transcript | FANTOM3 | C230042E08 | http://fantom3.gsc.riken.jp/db/annotate/main.cgi?masterid=C230042E08 | -1.5906100 | -0.3773594	NOCODE4.0		chr15	64753242	64755925	-	CTATCCAGGACTGCACCATTGATTCCTATTATTCTGAACAGTTCATTGGTTAAGCAGATAAGGGTTACTCTGGTTTTCCAATACATAAAGAGCCACTGTGGGACAGTCCACCCTTGCTTATTGTCTGAGTTAGGGTTTCCATTGCTGTGAATAGACACCATGACCAAGGCAAATATTATAAGGGAAAGCATTTAATTAGGGATGACTTACAGTTTCAGAGGTTTAGTCCATTATCATCGTGGCAGGAAGCATGGCAGCATCCAAACAGACACAGTGCTGGAGGATCCAAGAGTTCTACATCTTGATTGGAAGGCAGCCAGCAGGCAACTGACCAGGAGGAGGGTCTCTCTTCAGCATTGGGTGCA
n274362:5540174	7.8744	6.47807	6.61148	5.07144	7.13635	5540174	403	NONMMUT021924	3455	| AK082343 | mRNAlike lncRNA | Mus musculus | Mouse noncoding transcript | FANTOM3 | C230039J04 | http://fantom3.gsc.riken.jp/db/annotate/main.cgi?masterid=C230039J04 | -1.3029800 | -0.4136507	NOCODE4.0		chr14	93816341	93819794	-	GGGACCATCTAAGCTTTGTGCCTTAAATATAAGCAAGGAAAAACTATGCAAACAATTTAACATTATACAGATTGAGCAAGTTGTATTTATATATTTAGGAACACTCATACACACAGGCAATGACAATTTAAAAAAAGACACCATGAATTTTAAAAATAGCAGGGAGGTACATGGGAGAACATAAGGGATTGAAAAGAGGGAGGGTTGATGTAATTATAATCTCAAAATATAGAAATATTTTTAAAGTGAATATGTTGAGAATTCCGTGGGAATGTCCCTGAAGCTCCACTCTGGGTATAATTTCCTGAGACTGTACATGGACTTACACACACACAGTTCCTGACCATGAAAATACTGTTTACTTTTGGCTATTCCCAGGCACCCTGTTGATCAAGGCAA…
n274385:4925468	3.52529	2.56428	1.56303	1.46681	2.73445	4925468	578	NONMMUT066531	1303	| AK082312 | mRNAlike lncRNA | Mus musculus | Mouse noncoding transcript | FANTOM3 | C230036H16 | http://fantom3.gsc.riken.jp/db/annotate/main.cgi?masterid=C230036H16 | -1.3667200 | -0.2723870	NOCODE4.0		chr8	87473156	87503972	+	TCATGGCCTGCCAAACGAGAACTTGCAGGCCTAGCATGTAAAGGGACCAGGGAAGGAGGCAGAGTGGGGCCTGCTGTTGAGGCTGGCTGCTTCTGTGTTCTCTGCCTGTGCCAGGCTGCGTATGGTCTTCACTTGCCGTCTTTGAACTGAGAGAACCTCAGCTGTAAGTGTGTTGGTGTGCGGGATGCTTCCCCAGAGGGATTCGCTCTGCTCTGACAACACTTTGTCAATCTCGGGTAAAATGAGACCTTTCTCTTAAAGAGAAGGTTACAGCTAATTTTCTGTAAGAGCAGTAAAGTTAAGAAGACCTTCCCTGAGGGTAGAAAAACCACAAAACCCAGGAGCAGGGACTGTCTTCTTTCTTACAGTATTTACTATCCCCACCCCCACCCCTGCTGC…
n274409:4317384	5.45452	3.88009	3.15145	2.76837	3.90471	4317384	333	NONMMUT032196	3668	| AK048737 | mRNAlike lncRNA | Mus musculus | Mouse noncoding transcript | FANTOM3 | C230032N17 | http://fantom3.gsc.riken.jp/db/annotate/main.cgi?masterid=C230032N17 | -1.1590500 | -0.3759335	NOCODE4.0		chr18	43526207	43529880	-	GAAGGTAAGTCCCATATCCCAGTGATTAGCAGGTTCATTGTGCAGTTGATGTGAAACAGGGTAATTCTACTACGCTGGCCACCCAGCTAACTCAGTCCTGGATGAAAATACACAAATGGCTTGTTAACCTCTTTAATTATACTTCATCTACTATTATGGGGCCCACTTGAGAAAATGCATACTTCATCTGCTCCATACACCCCTTCCTTCTCTCCTTTTGCTTTCCCTATCAAAAACCTGGTGGGTAAATTTTCATATCAGAGAAATACGTCTAAATTATTATGAATGCTAGCAATATACCATGTGTTTCCCTGCTGTTAGTCGAATTGCATA
n274413:5246743	6.44991	4.42279	4.22706	3.75431	4.8793	5246743	151	NONMMUT024027	2866	| AK082284 | mRNAlike lncRNA | Mus musculus | Mouse noncoding transcript | FANTOM3 | C230032J03 | http://fantom3.gsc.riken.jp/db/annotate/main.cgi?masterid=C230032J03 | -1.0944500 | -0.2302190	NOCODE4.0		chr15	76523328	76526194	+	CAGTATTCGCTTTCCTCCGGCTAGGCCTACCTACCAGTTTCTGCCACTGTCTGGAAAATGCTATAATCTGGTTTCACTGATGGATTAGTGAGGCCTGGTAACCAATCAGTTTCTAAATGTCCCACCTCTGAACTTGGCTGCATCGGGAACC
n274415:4784299	5.05151	2.43636	2.10589	1.72873	3.26965	4784299	260	NONMMUT051283	2272	| AK082281 | mRNAlike lncRNA | Mus musculus | Mouse noncoding transcript | FANTOM3 | C230032E08 | http://fantom3.gsc.riken.jp/db/annotate/main.cgi?masterid=C230032E08 | -1.1629900 | -0.5016101	NOCODE4.0		chr5	14778931	14781202	+	CAGCAGGTAGAAGACAAGCTGCTCTTCCCAAGGATCTGAACTCAGTTTCCAGCACCCTCATGGTGGCTCACAACTTTCTCTAACATCAATCACAGGGTCTAACATCCTCTTCAACATTTGTGTACATTAAGCATACAGATGGTGCACAGGCATAGATGTATGCCAAATACTCATACACATAAAATTAAAATAATAAAAATGAATAAACCAATGAAAGTCCTATTACACTAATAAATGCACACTGATACAGTTTTATCTTC
n274427:5611627	4.29587	3.60354	3.39148	2.17916	3.56768	5611627	187	NONMMUT015202	1328	| AK082266 | mRNAlike lncRNA | Mus musculus | Mouse noncoding transcript | FANTOM3 | C230031E17 | http://fantom3.gsc.riken.jp/db/annotate/main.cgi?masterid=C230031E17 | -1.2062500 | -0.3937073	NOCODE4.0		chr12	90310317	90311645	+	GCCTGCAACTCAATTATCCCACTTATACTAATCTATAGTATAGTGCCACATGGCTGGTTACCTCTTCTCAGTTTCCAACTACCTCCACATTTTGATGGTAAATCTCCCACACCTGACTCTTTTTCCCTGTCTCTGCCGGGTGTCTGAATTTTTATTTTGCCTTGTGCTACAGGACATAGAGTTTTTA
n274432:4635693	4.9359	3.02394	3.03507	2.89319	3.19733	4635693	473	NONMMUT037063	1938	| AK082259 | mRNAlike lncRNA | Mus musculus | Mouse noncoding transcript | FANTOM3 | C230029N01 | http://fantom3.gsc.riken.jp/db/annotate/main.cgi?masterid=C230029N01 | -1.5906100 | -0.3800339	NOCODE4.0		chr2	41916454	41918239	-	CTTTGGGAGATTAACTTGGTAGACAAGATATCAAATCAAGGCAAGAAAAATGGCCCCTTTTACAACTATTAGTTGGCAGAGTTACTACTGTATATATAATATATAATTTTTACCAAAACAGTAACCATAACAGTGACATACTCATCACACACACACACACACACACACGCACACGCACACACACACACACACACACACATATACATACTGAGTGGAGAAGCAGGCTCTAAAAACTGTTTTTGAAGGTATCCAGATGGTACTTTTGGAAATATAGGCTTGAAGGCAATTGCGAATGTGATTAAGGATCTAAGAAAAACAATGCCTTCCAATTCATAAGCAATCTTGTGAACATGGCCCAATCCATACACTTAACCCTAAAAGAAATCTTCAAATGCCTGG…
n274484:5045810	7.01558	6.16104	5.65601	4.89411	6.03331	5045810	359	NONMMUT054688	2081	| AK082203 | mRNAlike lncRNA | Mus musculus | Mouse noncoding transcript | FANTOM3 | C230022P04 | http://fantom3.gsc.riken.jp/db/annotate/main.cgi?masterid=C230022P04 | -1.0291500 | -0.2761873	NOCODE4.0		chr5	130845245	130847333	+	TGGGTACAGGTCACTAACTTAAGCTTATTCTCAAAGCACAGATGCAAATGGCTGGGATTCGAGCCCTAGAAGCTGGGTGTCTCTGAAGCACAGGTAAAGACTGTTCCAATCAGTAGCTTCTTGCCTCTTCTTCCAGAATGTTCCAGTCAGATGTCAATCATGCATCTTAATTTCCCACTGTACCTCATTTATATTCTTTTGGGGTTTTGTTTATTTATTTTTTCTTCATTTAGTGTTAGTTGGTGATTTTCTGCTATTAAGTGGTGAGACAGCAGGTTAGTGAAATAAAAAACATATCTTTATATCAAATGTAAATATTAATATAAATGAACTTGGCATGCAACTTAAGTGATCCAACG
n274510:5183326	4.14056	3.40903	2.97994	2.01622	3.24713	5183326	264	NONMMUT000228	2322	| AK082172 | mRNAlike lncRNA | Mus musculus | Mouse noncoding transcript | FANTOM3 | C230017F14 | http://fantom3.gsc.riken.jp/db/annotate/main.cgi?masterid=C230017F14 | -1.5906100 | -0.3019023	NOCODE4.0		chr1	16210438	16210521	-	TATATGAATCAGCTCAAGCAGGCGCTAACTGCGGCCTCAGGGTCCTCAGGCAGCTAATGGAAGCCTATTCTTTGGTTTGATTTTTGTTTTGTTTGGCTTGGTCTTTGGTTTTTCGAGTCAGGGTCTCTCTGTGTGGCCCTAGCTGTCCTGGAACATGCTTTGTAGATCACGGTGGCCTCGAACTCACAGAGATCTGCCTGCCTGTGCCTCTTGAGTTGCTGGGATTAAAGACGTGAGTCACTGCTGCCTGACTTGGAAGGATAT
n274539:4847472	2.12637	4.29239	4.53156	4.493	2.35681	4847472	508	NONMMUT032664	1363	| AK082133 | mRNAlike lncRNA | Mus musculus | Mouse noncoding transcript | FANTOM3 | C230011O19 | http://fantom3.gsc.riken.jp/db/annotate/main.cgi?masterid=C230011O19 | -1.1791300 | -0.2576398	NOCODE4.0		chr18	64278244	64279606	+	CTGGAGTATTTGAACCCGTGCTAGAAATGCTGTTGAACCGCATTTCATACACAGAATATCACATGTATATATGAACTAAGTTTTGCTACTTGAGCTCCAGTGGATTTCATGATCAGCTGGAGATGTAATCACCAAGCGTCAGTAACTGGTACTGAAACCTCCCCAGACCTAGGACAGTGGTTCCCAACCTTCCTAATGCTGCGACCCTTTAATACAGTTCCTCAGACTGTAGTGACCCCACCAACCATAAAATTACTTCGTTGCTACTTCATAACTATCATTGTGCTACTGTTACAAGTTGTAATGTAAATATCTGATATGCAGAATAGCTGGCATGTGATTCCTGTGAAAGGGACAGTTGACCCCTCACAATAAAGGTCACAGCCCACAGGTTGAGAA…
n274540:5601977	4.74574	3.42891	3.34877	2.18508	3.16715	5601977	440	NONMMUT057509	2027	| AK141038 | mRNAlike lncRNA | Mus musculus | Mouse noncoding transcript | FANTOM3 | C230012B10 | http://fantom3.gsc.riken.jp/db/annotate/main.cgi?masterid=C230012B10 | -0.2306840 | -0.3451422	NOCODE4.0		chr6	80217450	80219476	+	ATGCCATTGCAATTAGTCCTTGTTAAATATTTCTACATAAATTTTACACAGAGATTTATGCACACATTTTAAGTAATTGCTTATATTTATTTATGTGTGTGCTTGTTTGCCAATTGTGTGCCAGAATCTAGAACATTGGAATGTCGGAATGTTTCCTGACTGGGTGCTGGGAACTGAACAAGAGTCCTTTGGAAGAAAAACAAACACTCTTAAATACTGAGCCATCATGCCTGGCCATCATATTTATGAGACAGTTTTATGTCTCATCTCCACCATTTAAAAATAGCATATGGAAATATTTTCACACCACTTGGTTCATTTCTGACTGTTTCTTATCCTCCGTGGTTCCTATTTTAAAATATTTGTATCCCTGATTATCTATATAATACACAGTATAAT…
n274548:4866882	5.61786	3.09546	3.15328	2.30043	3.53116	4866882	566	NONMMUT020427	3146	| AK141035 | mRNAlike lncRNA | Mus musculus | Mouse noncoding transcript | FANTOM3 | C230011F03 | http://fantom3.gsc.riken.jp/db/annotate/main.cgi?masterid=C230011F03 | 0.0983570 | -0.3650287	NOCODE4.0		chr14	39410070	39411209	-	TGGGACAGATACTTGGGACCTGTTAGATATTAATGTCATTTGAGGGGAAATAACTAGGTGGAGTTCTGTTCATAACATGAGTAATTTCTGAGTAGTAATTTTCTAAACAACATCAGAAACCACCAGATGATAACTTTAAAAAAGAAAAAAATGCACACACAATGTATTTTTATATAAGAATGTCCTTGGAAATCACATGTCTGCTGAATTACATAGACTACTGAGATAAGTTTTTCAAATTTTCATTTAAAATAATATTTTAACTATATTCTCTAATGAATTCCCTACTTACCCTAAATGCATCTGCAAAATAATATTTCATTATCTTTTCCTGAATAGCTAAGCAGTCTTTTTTAATATATAAATTGAAATAAATCCAGGATATGAGAATGGACACAG…
n274548:5359178	4.19611	2.82741	2.53924	2.03313	2.95494	5359178	260	NONMMUT020427	3146	| AK141035 | mRNAlike lncRNA | Mus musculus | Mouse noncoding transcript | FANTOM3 | C230011F03 | http://fantom3.gsc.riken.jp/db/annotate/main.cgi?masterid=C230011F03 | 0.0983570 | -0.3650287	NOCODE4.0		chr14	39410070	39411209	-	TCCCTCATCTAGTGGCTTCCAGTCATATCGGGAATAAAATGTAAACTTTGCTCACACCAGGAGTTCTTACCTGATGCATCATCTGACAAAATCTTTAACTTAATTTCTTCTATTCAGAGATAGACGTGTCTCCTTTCCATCAATTCATAATAATGACGTTAATGGTCTGCTGGGAATGCAAATGCTGCTGATTCATGGTTTACCAGCCTTAGAAACTTTATCCCCTTATTTACAACCCTGCTATAGTACCATCTCCTTTG
n274571:4310884	6.98174	5.07742	5.96566	4.59773	5.61005	4310884	364	NONMMUT026640	3753	| AK141029 | mRNAlike lncRNA | Mus musculus | Mouse noncoding transcript | FANTOM3 | C230008B04 | http://fantom3.gsc.riken.jp/db/annotate/main.cgi?masterid=C230008B04 | -1.1740100 | -0.3730540	NOCODE4.0		chr16	41607892	41611644	+	ACATCCTATCCAGGCGGCACTGGTACTGTTTTCCTAAACCAATCTGAGTTCTCTTGCCTTCAGCTACCATTCTGCTTTCCCCTGAATTCTAGACAGTCCCCATTTGCAATAGTGATTTATTGACAGATTCTCATTCAATCTCTTTAAAAAATGATCACAGTTGTAGATGGGTTATAATGACAAGCTTGTTTTGGGTGGGCTTACTGAAGAGTCTTGATATCTTGTGCCCTCCTTTTGGCAATTACCTCTTTTGTAGTTACCAATACAAGGTTACCTTCAGTAACCTTGAACTCACTGTATTTTAACCTAGTTTTCCCCTGTAAGGGGACATTCCCCTCCTCTGCACACGGCTGTATAGGTTCTC
n274571:4504926	6.82237	4.15651	4.24202	3.29534	5.1117	4504926	762	NONMMUT026640	3753	| AK141029 | mRNAlike lncRNA | Mus musculus | Mouse noncoding transcript | FANTOM3 | C230008B04 | http://fantom3.gsc.riken.jp/db/annotate/main.cgi?masterid=C230008B04 | -1.1740100 | -0.3730540	NOCODE4.0		chr16	41607892	41611644	+	TTGCCCTCTATAGATTCGGAACTCAGACTTAAGTCAAGCAGGTGGATGTCACCAATACATCTGCCTGGTCGACAATCAGATTTCTCTAACTCCTTTTCTGCCATATGGTGGTTTAAGTAGGAATGGCCCCCACAGACTCATGGGTTTCAATGTGTGGGTCATAGGAAGTGGTTTATTAGGAACGGTGGCTTTGTTGAAGTAGGTGTGACCTTGTTAAAGGAAGTATGTCACTCTGGAGGCGGGCTTTGATGTGTCATATGCTCAAGCTAGGCCTAGTGGGACGGTTTCCTTCTGCTGCCTGCAGATCAGTATGAGAGTTCTCAGCTCTGTCTTCAGCACCGTGCTTGCATGGTGCCGTGCTTCTCACCATGGTGATAACAGACTGAACCTCTGAATCTA…
n274657:4376078	2.52938	4.35878	4.7848	5.03567	2.60659	4376078	584	NONMMUT065501	878	| AK082031 | mRNAlike lncRNA | Mus musculus | Mouse noncoding transcript | FANTOM3 | C130096N24 | http://fantom3.gsc.riken.jp/db/annotate/main.cgi?masterid=C130096N24 | -0.8278630 | -0.2776214	NOCODE4.0		chr8	46833035	46833912	-	GGCCAGCAAATAACCACCTTGGGTGAGAACAGAAGACAGAGAACACGGAAAAGGAAAAAGCAAGGGACAAAATCAAAGGGACATCCAAGCTGGGGGTGACAAGTACTCTTTTCCAACTAGAAAACCAAAGGCTTCAATAAGGTAGGACTAGAAGAGATGAAGCTGAGTGAGTTCTGGGCACTGCTCAGACGGCCCTGTTTCCTAGAGCCCTTCCTGAGCCCGACCCACAGATTCATTTGACCTAAGCATTTCTCACACCCTGCAAATGGAGCTCAGCCCAAAACTGCATGAGCTTGTAGCACATCCCGATTTTCTGCCTCGGTTTCTGGTTAACTCTATGTGGCTTTTCTTGACCTTTCATTTGTATGTACAGCATCTCTCGAGAGCTGAGAGATACTC…
n274657:5457096	4.50457	2.97584	3.35877	2.42957	3.23361	5457096	78	NONMMUT065501	878	| AK082031 | mRNAlike lncRNA | Mus musculus | Mouse noncoding transcript | FANTOM3 | C130096N24 | http://fantom3.gsc.riken.jp/db/annotate/main.cgi?masterid=C130096N24 | -0.8278630 | -0.2776214	NOCODE4.0		chr8	46833035	46833912	-	GCCACATAGAGTTAACCAGAAACCGAGGCAGAAAATCGGGATGTGCTACAAGCTCATGCAGTTTTGGGCTGAGCTCCA
n274684:5588510	4.43085	2.93903	2.82155	2.24926	4.09525	5588510	343	NONMMUT046662	3541	| AK140993 | mRNAlike lncRNA | Mus musculus | Mouse noncoding transcript | FANTOM3 | C130093G02 | http://fantom3.gsc.riken.jp/db/annotate/main.cgi?masterid=C130093G02 | -1.1647800 | -0.3561245	NOCODE4.0		chr4	34577169	34580703	+	TTTCTCTTCCTTCCAGCTGCACTGGAGGTGGTTACCTTGTTTTAATTTGTGCTCTTGTCATCACTTTCATATCTTACTTCACAACCAGGAACAATATAGACAGACTGAAGCTAAAAACTCAGACATGCTGATGCCATCTACACTGTAGGAAGGGATTGGTTTTCTGTGCTAATTATAGAATTAGAAGGCAGGAAAGAAGTGCTACAGGAAATCTTGGGTAACTCCTGTGGAGACAGTGGAGACATTATATATACCAGGGAAATCGAAGTCCCTTTTGGGGGTCCTTAGTCTAGGTTCATGGAAAAAATTAACCAAGTGCCCAAACAAGCGGAGCAGCAATTTC
n274746:4697794	2.74268	3.74643	4.15727	5.02294	4.45119	4697794	259	NONMMUT020782	2433	| AK081934 | mRNAlike lncRNA | Mus musculus | Mouse noncoding transcript | FANTOM3 | C130088B05 | http://fantom3.gsc.riken.jp/db/annotate/main.cgi?masterid=C130088B05 | -0.1878800 | -0.3897410	NOCODE4.0		chr14	52084592	52087025	-	CTCCTAAAGCTCATAAGTGTTGTTGAATACTTGACTCCACTTAGCCATTTTAGAGTTTTGGTGATGGTGATGACTGCCTGGAATTGAGACACTATTTCTTATTTTGTATGCAACATAGAGTATTTATTATATTTCTTACTTAAAATTTCTGTCATTTATCTGTCAGAAGTAAGGTGTAGGCAAGAAGGTTAGTGTGTAAGGTGCTTACTGCGAAGCCTGTCAGCTTCAGTTTGATTACCCAGACAGAACTCAGATGATG
n274748:5152548	5.38875	4.30901	4.38205	2.49946	4.68562	5152548	384	NONMMUT056556	1968	| AK081931 | mRNAlike lncRNA | Mus musculus | Mouse noncoding transcript | FANTOM3 | C130087O22 | http://fantom3.gsc.riken.jp/db/annotate/main.cgi?masterid=C130087O22 | -1.1791800 | -0.3461935	NOCODE4.0		chr6	39883806	39885773	+	CAGCTGGTGTGGATTAAGGTCTCAATGCTGGAGAATAAGAGACTGTGTTATAAAGTTGAAGACGTGCACACATGTTTATGTACCCGTGAGTACATGACACCAGCAGAAATACCCATGGTATTTCTACTTGTAATATCAAAATAAAAATATTGTACCAAAAAGCAGAAACCTAATTGTCTACTAATAGGGAATTGATAATAAATTATAATATATCTATACAATGGAAACCAGCACAGTATATTTAAAATATATGTACCCACTTCTGGGCATAGACTCCAAAGACTCTGAATCAGCCTAGCACATAAATACCCACGCACCCATGTTCACTGCAGTGCTGCCAGATTATGGAACCAGCTTCAGTGTCTGCCAATAGATAAACCGATA
n274767:4862312	5.37546	3.35663	3.18857	2.40406	3.00804	4862312	467	NONMMUT027201	1284	| AK081909 | mRNAlike lncRNA | Mus musculus | Mouse noncoding transcript | FANTOM3 | C130086G13 | http://fantom3.gsc.riken.jp/db/annotate/main.cgi?masterid=C130086G13 | -1.1066000 | -0.2978017	NOCODE4.0		chr16	72158946	72160238	+	TGTGTATCGTGTTACCACCTCTGTATATTCTAGTGTGGATCACCCTGTTATGTCACAAAACACCACATTCCACATTCGTGTGTCACAGACCATGAAGACATGGAAACTTCATCAGTATTGAGTGGAGTTTATAGTGCTTAAGTGGATATCCATACTACCAAAGTTAAACATAATCATCGATCTCACCCAGCAACAAAGCCCTTAAAAAACAATAGTAACCTGCTGTGAGATACAACAGTGCAGAAGTGGCAAACATGTTACAGGAGTGAACAACCACTGATAGGATAAAGGAACACTCCACAAGACATAAGATGTCTGTAGTACCCAAGACCATTGATGAGGCCAAGAAATCTGATTCTAGGTAGGTCAAAATCTTAGATGGAAGCCCATTATTATTAT…
n274811:5308936	4.80262	3.61308	3.00813	2.55114	3.8158	5308936	807	n274811	2313	| AK163850 | mRNAlike lncRNA | Mus musculus | Mouse noncoding transcript | FANTOM3 | C130082M19 | http://fantom3.gsc.riken.jp/db/annotate/main.cgi?masterid=C130082M19 | -1.3647900 | -0.5006031	NOCODE3.0		chr12	109650920	109653992	+	TTGACCTCTGGTAGCACACGATTTGTGGATGATGGGTACAGGTCTGGAAGTCTGAAGTCTATATCTTTAAACTCTTAGTATGAACTCATGTCAATTATTAGGAATAAGCTACAGTTAGATAAAATATCAATAAAATAAATCCCTAATTCATGTTCTATTCAGCACTTACTTGCCCAAGATTGTTAAAATATACACCAAACGTAATACTTTTTGAGATGTGATAGCTGAGGATGTCACATGAATTAAATTTATTGGCACTGTTCCTTGTAGGTTAGAATAATGGCCATTTGTTTTCTCAATAAGAACATAGTATTAGAGTGCATATGTAGATAAGCAATAAGAAAGAGGGTATTAAGACAAGCAAACAGAGAGCATGGATGAGCGAAGGGACCTCCAGTC…
n274817:4889971	4.68065	2.77767	2.85408	2.06928	2.81305	4889971	362	NONMMUT056680	2542	| AK048588 | mRNAlike lncRNA | Mus musculus | Mouse noncoding transcript | FANTOM3 | C130082B22 | http://fantom3.gsc.riken.jp/db/annotate/main.cgi?masterid=C130082B22 | -1.2245400 | -0.3630170	NOCODE4.0		chr6	45194875	45197417	+	TTACCATGAGTCATATTGAAATTGAATTCTGGAACACAGAGACATATTTTTTTCTAGAATTTTTGGAAAGGAATTTGTAAAAAAAATTGAAACAATAATTATACAAGTAAGGAAAATAGATTAAAGAGAACATTTGGAGTCTTCTCACTCCTGACTGCTCTGAAAAAAAAAAAAGAAGGACATTAACAGGACTTATAGAAACGTACTTAACAAAATGTTAATGTTTTTACTTTTCAAGATACAGAAAGAAGATGTTTACATATATATGCATATATATTTGACACAGGTATACACACACACACACACACACACTCACCTATATAGTTTTAAATTTATAATGTATTGATAAGAGTCAGAAGGTC
n274855:4859735	7.04733	5.97267	2.77694	3.94895	4.0814	4859735	1026	NONMMUT038925	3763	| AK081811 | mRNAlike lncRNA | Mus musculus | Mouse noncoding transcript | FANTOM3 | C130078N14 | http://fantom3.gsc.riken.jp/db/annotate/main.cgi?masterid=C130078N14 | -0.1480820 | -0.3046766	NOCODE4.0		chr2	104671617	104675373	-	TAACCTGACATTGGGGCACTGTATCAATGTACTGTAAGTAATGCTCCCTGATAATCCCCTGTTGGTTGGGGCTTGTGACTGGGCAGAATGGAGGTCAGGACTGAGAGTTGAGTATGAGCTCTTGAGAGAGAAGCCGGAGGTAAGAGTCACCATTACATGGGATGGACCATAAGAAGCCTGTGGCCAAGAGAAGTGAGTCCTGAGGAAGGGCTGGTGGAGCAGAAGCAGCCTGAGACACACCAGGTTGGCAGGTGATTGGCATTTGTGTGGGTTTTACAAGTGGAAGGGTTAGAATAGCTCAATGTGCCCAGCATAATGCCTACAACTTATTAATAAAGTATAATGTTTTTGTGTTGTTTACTTGAGAATGCATGGGCAAGAAGTGAGGTAGAAACTACC…
n274855:4935893	6.75802	6.44233	2.1267	4.74542	4.90488	4935893	414	NONMMUT038925	3763	| AK081811 | mRNAlike lncRNA | Mus musculus | Mouse noncoding transcript | FANTOM3 | C130078N14 | http://fantom3.gsc.riken.jp/db/annotate/main.cgi?masterid=C130078N14 | -0.1480820 | -0.3046766	NOCODE4.0		chr2	104671617	104675373	-	GGTCTTCTCCTGTCTACTGACAATATCTTCTCTTGCTCAGTCTCCTCTCTAGCCCTACTCCGTCTTTCTTCCTACATCACGTGTCTTCTCTGACTCTTCTCTCTCACCCTACTTTTCTCCTCTCTCTCCTATCCTACTACAGTGTGTCCTGGACCCTATTCCTCTTCTGCCAGCCTTTGCTGGCTTTTTATTTCCTCTCCTGTTCCCACAAGACCAAGAGGAAACCAACACTAAAGGTCATAGGGTTAAGCACTAAGTATTTTCAGAGTCAGTTGACTAGCCATGGGGGATCCTTTAAGGGGCCAGGCACGCACATCATTCTACAGTTTCTATCAACACCTACTTTGCAAGCCTTCACCTAGCAACTGATCTTTTACTGTATTCATTCTGCTCGCTCTA…
n274855:5404569	5.53614	4.23763	1.97715	3.06288	3.86149	5404569	246	NONMMUT038925	3763	| AK081811 | mRNAlike lncRNA | Mus musculus | Mouse noncoding transcript | FANTOM3 | C130078N14 | http://fantom3.gsc.riken.jp/db/annotate/main.cgi?masterid=C130078N14 | -0.1480820 | -0.3046766	NOCODE4.0		chr2	104671617	104675373	-	CTGCTAGAGCAAGATAGTCAGCTGCTGTGGACAGTCTGAAGCAGCCTCATATCCCCACACCAGGGATTAAATGAAAGCACATCCTTATAATACTAATACTAATACTAATAAAGCCAAATTCCAGAATTTTCATAAAGGCCACCACAATATACTTGTAATCTTAGTTCTTGGGAGGTTGACACAGTGGAATTGCAAGTTGCAGAGTAGCCTGGACTATATATAGTGACAGCCTCAATCAAAAGCAGG
n274856:5255614	6.71202	4.79069	4.51831	3.82482	4.43152	5255614	199	NONMMUT031132	2929	| AK140948 | mRNAlike lncRNA | Mus musculus | Mouse noncoding transcript | FANTOM3 | C130078J02 | http://fantom3.gsc.riken.jp/db/annotate/main.cgi?masterid=C130078J02 | -1.1528500 | -0.3909123	NOCODE4.0		chr17	90897602	90900530	-	GGGATATATTAACGGGGCACTGAGCACAGTCTTCTGCATTTGACAATTCAGCCAAGAGAGGTTTGTTGGTGTGGTTGAACTTCTTCTGCTTTTACCCATAAAGTCAGCAGTCCTTCTGTTCTTGCCCCAAACATTGTTGCTAGTGAGAAGAAAACCAGAATTCTAACCCCCAAACTTCACCTGATTCTGGCTAAACACT
n274861:4473801	6.94426	5.03059	5.16581	3.96057	6.38194	4473801	220	NONMMUT051223	2934	| AK048573 | mRNAlike lncRNA | Mus musculus | Mouse noncoding transcript | FANTOM3 | C130078G20 | http://fantom3.gsc.riken.jp/db/annotate/main.cgi?masterid=C130078G20 | -1.4034000 | -0.4068630	NOCODE4.0		chr5	9475801	9478735	-	ACGCCTGTACAGCTGAAACTCAATACTTGAGAGGCTCAGGCAGAAGGATCAAGGGCAACAGAGTGAGACTCTGCCTCTAAAACAAATACAGTGAAGCACCACATTATAGAAGCAAAACAGGAGAGTGGAATTTGGGGAATGCTGATTTCTCAACACTAGTGCCTGTTAGACAAATCAGGATCCTGCCTACAAGGATGCCACACAGGACTCAATCTACACA
n274861:5514253	4.56589	3.46622	2.32452	2.29022	3.45707	5514253	1037	NONMMUT051223	2934	| AK048573 | mRNAlike lncRNA | Mus musculus | Mouse noncoding transcript | FANTOM3 | C130078G20 | http://fantom3.gsc.riken.jp/db/annotate/main.cgi?masterid=C130078G20 | -1.4034000 | -0.4068630	NOCODE4.0		chr5	9475801	9478735	-	GCAACCATGTGTATGCTCGCAATGAATGTACATTGCCTAAAGTATTATTCTCAACCTATGGGTCATGACACCTTAGTCATGTTATAATTTATAACAGTAGCAAAAATACAGTTATGAAGTAGCAATGAAATAATGTAATGGTTGGGGGTCACTACAACATAAGGAATCGTATCAAAGGGTCACAGCATTAGGAAAGTGGAGAACCACTGCCTTAAAGAAACCTTAAAACATATTTCTGAAATGTTTAGGAGTGAGGCTTATTGCAGTTTACAACTTATCTTAAAATATATGAAGACACTGATAAAAATTTCAAGATGAGCAGATATGTAACAAAGCAATCAATAAAATTTAGGTGGTATGTTAATGATTTGTCTCATATAAGTGTCTCACATTTTCTCC…
n274866:5384620	4.94638	3.71168	3.13116	2.43888	3.70069	5384620	335	NONMMUT014378	4127	| AK140946 | mRNAlike lncRNA | Mus musculus | Mouse noncoding transcript | FANTOM3 | C130078A14 | http://fantom3.gsc.riken.jp/db/annotate/main.cgi?masterid=C130078A14 | 1.1213100 | -0.4003805	NOCODE4.0		chr12	61539087	61543215	+	CAAGGAGTATGTGCTGTAATCGATATCATAATTTATAATCTATTCTAGATGATTCTTTAGAGGAGGAAAACATTGAGCAAGGAAGGTTATCAGCAAAAATAGAACACAGCAAGTAATATAAAAATAGCATTCTCCTCCCTGTCTCTTTCAGTCTGGGTAAAGCATTCCCCCTATGATTTTATACAAGCTCAAAAAGTGCTATTAAAGACTCACTTTTTATTGAGGTAACTCTGAGCTATTCCAAATATAACCATTACCAGTCTACAGTGATATGATATTTTGTTAAAACAGTGGTTGAATTCTCAAACACTTATTCTGTATCACTGCTCCAAGCC
n274903:4994014	4.24163	1.75472	2.21581	1.98502	2.15681	4994014	422	NONMMUT027225	3014	| AK048557 | mRNAlike lncRNA | Mus musculus | Mouse noncoding transcript | FANTOM3 | C130074E16 | http://fantom3.gsc.riken.jp/db/annotate/main.cgi?masterid=C130074E16 | -1.1034000 | -0.3514119	NOCODE4.0		chr16	73044475	73047489	+	TCTGTATATCAGAAGGCCGGGACAAGACCGGATCCTGGCTTTGTCCCGGTTGTGTTTCTTTGGACATGTTACCTAACCTCTAAGTCTCAGGTACTTCACCTGTAAAGTCAGTAATACCTACCTCAAGGAGCGATTGTCATGATTCAGTGAGTTGATGTATCTACACAGACTCTGTAAACTCCACAACGGTATTAAGATATTGTTATCTTTATGGACTGAAATTCACTACACATGCAGTCTCCATGTTTTTCATCCCTGATTTGTTCCTAAACATTTGCATGAGAGAAAAAGCATAAGTGTGGTGTAAGGACGAGGGTCCTTCCATCTCTGGTAAGTAAAACTCACTGTGAAATTACCCCATTGTGGAATAAATGCTTGCTGTTCTTGTTCGTTTCTTTG…
n274945:5073135	1.60019	3.72726	3.53561	3.72725	2.39857	5073135	441	NONMMUT073014	2010	| AK081713 | mRNAlike lncRNA | Mus musculus | Mouse noncoding transcript | FANTOM3 | C130070I23 | http://fantom3.gsc.riken.jp/db/annotate/main.cgi?masterid=C130070I23 | -0.9071760 | -0.3727376	NOCODE4.0		chrX	81087380	81089389	+	GAAGCCTCCTGTAAGTGATTATATGGAGTGATGGCTCTTTCCCTTATGATCTAGCAGCTAATTTTTATTTCTGAGTTTTCTCTGGTCCATGATTAGAAGCTTGTGTTTGCTACCTCTTGTCATCATCTTAAAAGATATTGTGAAAATGGGCAGTCATTTTAAATCTCTGTTTGACTAAAATTTAGTCCAGTTTAGATTATAAACTAAAAGGATGTTCTACTCACAGGTGTTTAGATACTATGTTACTTTCCATGTGTCAGTATGCTACTATACTTCGGTTAGAGTGTTTTACACTAATTTATTTTATACTTGTACTACTTTCTGAGTTATAAATTTAATTAATCAATAGCCCAACATTCCCTTTGTAGGAGAAATGTTTTTATTATCCAAATTACAATT…
n275032:4387096	3.97353	2.08672	1.94041	1.90725	3.51398	4387096	119	NONMMUT032957	1843	| AK048451 | mRNAlike lncRNA | Mus musculus | Mouse noncoding transcript | FANTOM3 | C130061N14 | http://fantom3.gsc.riken.jp/db/annotate/main.cgi?masterid=C130061N14 | -0.4012780 | -0.3781195	NOCODE4.0		chr18	72164056	72165898	-	TGGTTTGTTCATGGGCCTTCAGGCTGTTGACTTTTGAATCCATGTGAGCTCAATAAATTTCTTTTCATAGAGCCTGTCTTTGGTTATTGTTGGATGGCATCTGCCATCTCATATAAAAA
n275066:4851889	5.76009	4.12768	4.07762	2.78028	4.90957	4851889	232	NONMMUT000396	3106	| AK048426 | mRNAlike lncRNA | Mus musculus | Mouse noncoding transcript | FANTOM3 | C130060B02 | http://fantom3.gsc.riken.jp/db/annotate/main.cgi?masterid=C130060B02 | -1.5906100 | -0.3587941	NOCODE4.0		chr1	25345977	25349082	-	TTTCCTAGGTCCCAGAGTGTAAATCTTATGAGTTTACGTATGAATAGCAGTGAAGGTTACATCATTCTAGGAAAAGAAGAAATATCCCAGTACCACTGACTAGGTGCCATAATTTTTGGTGTTAGGTCACTGTTCCTTTAATACACTGCTCATCCCAGTGAACGTTCTAAGTTCGCCATTTCCGAAAGTTCTTTGGTTAATGCCACAGGCAGTGCCATGTAGATAGGAAACA
n275102:4803842	5.31673	4.30612	4.75733	2.18643	4.92718	4803842	231	NONMMUT037074	2665	| AK140879 | mRNAlike lncRNA | Mus musculus | Mouse noncoding transcript | FANTOM3 | C130055E12 | http://fantom3.gsc.riken.jp/db/annotate/main.cgi?masterid=C130055E12 | -1.0590700 | -0.3918910	NOCODE4.0		chr2	42487677	42490342	-	AGCTGCTCATTGGTCTCTCATCTTATCTCAAATCATATGGACAGAGAAAATGGGTTAACAGTTGTTTTCTGTCATCCTGTCATTTTTTCTGGGAAGGGAGTTCTTCTGCCAACTCTTTCCAGTTGCAGACAGCCTCCTGACTGACAGTTTAATAACTCACAGACAGTTTAATAACTGTCTATTGGGGAAGATCTTCTAAGTAGATATCTATGGCAAAATCAGTTCAGCAGC
n275121:5349129	6.23526	3.94203	3.26953	2.52185	4.43303	5349129	384	NONMMUT042289	3123	| AK048372 | mRNAlike lncRNA | Mus musculus | Mouse noncoding transcript | FANTOM3 | C130053G17 | http://fantom3.gsc.riken.jp/db/annotate/main.cgi?masterid=C130053G17 | -1.0264200 | -0.3496603	NOCODE4.0		chr3	25740149	25743271	-	TGGCTTGTGTCCATGGTCTTATCCAGCGTTGAAAGCACTTTTAAGTAAGATAAAATATATTCATTCACTATTATTTCATTTAAATAACACATATTTGAAAGATTACTATGTACCTAGTTCTGTAGATATCATCGTGTAATCAGATAACTTCCTTTAGGAAGTTTCTGGACCAGTGGAATAGAAAATATATACATGAAAGTGTGTGTGTCCTCATGTATATACATACACACACACACACACACACACACACACACACACACACACACACACACATACAGAGAATAAGTAGCCAATGCTGACAAATGCTTCAGTAGAAAAGTATTTACCCTCTGTTAACTTTGGTTAGAATTCTTCAGTTTGCAAAGTAGCATGGAGAATAGTCTC
n275245:5469644	2.93404	3.44257	3.4203	5.13339	3.22982	5469644	205	NONMMUT054214	1008	| AK048257 | mRNAlike lncRNA | Mus musculus | Mouse noncoding transcript | FANTOM3 | C130043M12 | http://fantom3.gsc.riken.jp/db/annotate/main.cgi?masterid=C130043M12 | -1.0451300 | -0.2432644	NOCODE4.0		chr5	119611262	119627382	-	CTTCTCAGTGCACATGGGTCCCGTGCCCTAGCACCCAATAGGTAGATCTCCTGCTTGTCCGTTCCCTAGCATCCAATACTGGCAAGAGAGGCAAAGGCCCCCACCTCCTCTGCCTCTCTCCTTACTCCCTTTCCCGACTCAGAGTCCTAGGTTGGTTAAGAACCCCCTAGCCCCACAGGCAGCTGTCCTTTGCACTTAGCCAAGC
n275266:5082294	2.42086	3.38511	4.97844	4.55562	2.94746	5082294	89	NONMMUT058179	1747	| AK048235 | mRNAlike lncRNA | Mus musculus | Mouse noncoding transcript | FANTOM3 | C130041P20 | http://fantom3.gsc.riken.jp/db/annotate/main.cgi?masterid=C130041P20 | -0.9597510 | -0.3548644	NOCODE4.0		chr6	99130000	99131747	-	TTTCTGCTGTGGAGTGAATGATGCCTTCATCCCTTTAAATCGAGGCATCTAGGTTCCTAAGCAGCATCTTGGTGTATGTATGGTCCTTC
n275269:4778318	4.85391	3.863	3.42996	2.74062	3.62532	4778318	301	n275269	1856	| AK048233 | mRNAlike lncRNA | Mus musculus | Mouse noncoding transcript | FANTOM3 | C130041N12 | http://fantom3.gsc.riken.jp/db/annotate/main.cgi?masterid=C130041N12 | -1.0951600 | -0.4221910	NOCODE3.0		chr8	9598798	9600653	-	ACAGCGATTAGACACGAGGCAGGCAGAGGAAGAACATGAAAAGCAAAATGACGGTGGCTGGGCAGATAATTTTCTTTCTAGCAAATGAAGTTTACAAGTAGAAAGATTAATGGCAGGAAAGCAGAACACAGAGACTGGCGAGGAGTTTATAGAATCAGAAAAATCTACCAGTCTGGCTACACAGGAGCCTTAAAATCCCAACAAATACAAAGCCAAGTCCACAACAGCAAGAGGCTTTACAACAAAACTTAGGAGCAGGAAAGAGGAGGGTCTTCAGGTCACCTATCACGTGCCACTTTCA
n275277:5481865	1.7533	3.02865	3.5587	4.36826	2.51589	5481865	88	NONMMUT013797	3180	| AK048225 | mRNAlike lncRNA | Mus musculus | Mouse noncoding transcript | FANTOM3 | C130041D09 | http://fantom3.gsc.riken.jp/db/annotate/main.cgi?masterid=C130041D09 | -1.1593200 | -0.3703033	NOCODE4.0		chr12	29528400	29531579	+	AAATAAAAACCGTCAGCTACAGATCTGGGCTGCCACCATCTTCAAAACATCCAATTGTGACCATAAACACCACTCGACTGACTTCTAC
n275327:5354437	4.96065	2.98257	4.15372	2.48419	3.4766	5354437	348	NONMMUT052917	4098	| AK048171 | mRNAlike lncRNA | Mus musculus | Mouse noncoding transcript | FANTOM3 | C130038K14 | http://fantom3.gsc.riken.jp/db/annotate/main.cgi?masterid=C130038K14 | -1.0194900 | -0.3718266	NOCODE4.0		chr5	81430675	81434771	+	GAGTCCATGATCAGGGTCGTTTGCATTGGAAATGTGTTAATTGTATCCATGTGGGTTGGCACAACATGCAGTAGCAACTACTGCAAATCAAGTCTATCTTTCTGCTCCAGATTTTCCATCAATTACGATGCAAAGTCATTGATAAAATTCCTGCCAACCTTTGGCACACTCTTTCTAGTACTGCCATTTTAACACCCCAGGGTAACAGCACTAGGACAGATCTGTACCTTCATACATTCTGCATACCCGCCTTGTTAAAATGTGAAAAACTACTTCAAAGAAATCACAACGTCAATGCTATTATGCTTTACATAGATTTTAATGGCCTGCTGTATAAGATATGAATTG
n275392:5259745	5.16719	4.95374	4.50015	2.70224	4.14704	5259745	175	NONMMUT056557	1715	| AK048071 | mRNAlike lncRNA | Mus musculus | Mouse noncoding transcript | FANTOM3 | C130033B14 | http://fantom3.gsc.riken.jp/db/annotate/main.cgi?masterid=C130033B14 | -1.1959900 | -0.3771358	NOCODE4.0		chr6	40026893	40028607	+	TGGCTTCTTAGGCAAAGTATCATCAGCTAACCTTTAAGCTGACTGGGCCTCAGTCAGGTAACGGGTGGTGGTGGATGGGTGGTGAACAGGGGAATTTCAGAACATTGAGATAACAGAGCACGAGTATTACAATCATAATGTTTCAACTTATTAGTAACATTTTTCAGGGTCAGCC
n275412:5117752	7.01305	6.36996	6.12502	4.10542	5.58255	5117752	122	NONMMUT072612	2374	| AK140811 | mRNAlike lncRNA | Mus musculus | Mouse noncoding transcript | FANTOM3 | C130031D02 | http://fantom3.gsc.riken.jp/db/annotate/main.cgi?masterid=C130031D02 | -0.6715600 | -0.3935535	NOCODE4.0		chrX	61179074	61181448	+	TGTGTAATCCTCTAGCCTCTGACTATCATCCTCCTTTATTGGGACTTTAGGTGCATCCCATTTTATTTTGTCTCTGAATATAAGGGAACCTGAACAATTAGCAGCTTCAACTCTTGTGTATC
n275437:4542357	4.89983	3.82135	3.03708	1.65855	3.52963	4542357	370	NONMMUT020425	2707	| AK048004 | mRNAlike lncRNA | Mus musculus | Mouse noncoding transcript | FANTOM3 | C130029F03 | http://fantom3.gsc.riken.jp/db/annotate/main.cgi?masterid=C130029F03 | 1.8974400 | -0.3366377	NOCODE4.0		chr14	39389522	39392229	-	GAACACAAGGCTGCATACACATATGTGTAATGTATACACCACACACACACACACACACACACACACACACACACACACACACACTCACACACACACACACACACACACACTCACACTCACACAGAACTAATTGAAAATTAGCAGACTAAAGTTGAGCCTTCTGAGAAGTCAGTTACTTCTGGATTCAGTCCTGATTTCTGTTCCTTGTTTCCAACACAGCTTTCCTTCTAGGTGACCTGATCAGATTCATGGCTTTAATATTCCCTCCATGCTGATGATACCAAAATGTGTTTCTCTGGCTCTCTCTTCTCCAATAAACTGCAGGCTCATTTATCCAACTGCTCACTCAGTGTCTCCAGTTATATGTGTA
n275484:4962611	2.41259	5.03476	4.053	5.12093	4.01796	4962611	305	NONMMUT027393	3091	| AK047945 | mRNAlike lncRNA | Mus musculus | Mouse noncoding transcript | FANTOM3 | C130023A14 | http://fantom3.gsc.riken.jp/db/annotate/main.cgi?masterid=C130023A14 | -1.2989600 | -0.4248191	NOCODE4.0		chr16	77646339	77649426	+	TGGGGCTTACCTTAAACTCATCTTCAAAATGGCATGCTGGTACACGTGCTAACCTTGAACGAATATATTTTAAATATGCAAATGACCTTGCAAGCTGTCATGTTTGGATGAGTTTATAGTATAGCAACATACAAAGGGGGGCTGAAGCTCAAGTTTCCTTGCCATTTTCACATGCAATGCAGCCTCCTTGTTCATAGGCAGCCAAGGAAGGCACAGTTTTGATGCCTGGATTCTTTTGTCTGATTTGTTAGTAGACTTTTAATTCAGTATTCAAATCCCACTGATCCCTAAGTGACTGCATCTGA
n275510:4921956	5.66832	4.83616	4.04858	3.61121	4.97553	4921956	606	NONMMUT004432	3516	| AK047918 | mRNAlike lncRNA | Mus musculus | Mouse noncoding transcript | FANTOM3 | C130021L12 | http://fantom3.gsc.riken.jp/db/annotate/main.cgi?masterid=C130021L12 | -1.5906100 | -0.3591355	NOCODE4.0		chr1	192891235	192894751	-	TCAGTGCTGGAGCTACGATCTGTTAGAGTCTGATAAGTGTTGTGACCTAGTCTTTTTCTAAAACCCAAGAGGTTCATCACTACTCCGGGGCATTGCTTCTCAAAAATAATGTACTTTTTATAGGAAAACTCAATCAGTGGATCTTTTTATTCGGTATCCCTCCTCTTCCTCCCCAGTCCCTCCTCTCTTCCTTTCTTTGAGTTTTTGAGGCAAGAAGCTTCCTGAATAGTCTAGTTTCTACGGAGCTTTCGTACTTATTTTTCTAATAATAGGTGTAGCTGAGTGATGATGTTTAACTGCTCTGTGAGCAGAATTCTCAACCAACCTGAAGAAACATGCTGCCTATGGGTGTTTCCTTTGGTCTCAACTGTGTCTGACCTGTTTGCTAGTGACTTTCAC…
n275518:4711610	4.3011	3.48317	3.2276	1.53524	2.38225	4711610	161	NONMMUT032971	3388	| AK047911 | mRNAlike lncRNA | Mus musculus | Mouse noncoding transcript | FANTOM3 | C130021F02 | http://fantom3.gsc.riken.jp/db/annotate/main.cgi?masterid=C130021F02 | -0.8964890 | -0.3094089	NOCODE4.0		chr18	72335254	72338647	-	ATAGATAACTCCACTCCTTGGCATGTAGTATACACTAAGCATTTTCTGATATTATCCGGATTTTCCACAGGAGTTTATGAAGTTGATATTTGATCATACTCTATAGTGAATTTACAAAGCTTATAACAAAAATACCAAAACCCAGCTGTAGTGGCACATAC
n275569:4546865	5.76254	5.72904	4.34812	2.98592	4.41682	4546865	385	NONMMUT022695	1877	| AK140786 | mRNAlike lncRNA | Mus musculus | Mouse noncoding transcript | FANTOM3 | C130018L13 | http://fantom3.gsc.riken.jp/db/annotate/main.cgi?masterid=C130018L13 | -1.2644300 | -0.3319553	NOCODE4.0		chr15	8500968	8502845	+	CACAGTGATACCATTCGTTGGCATATACTCAAAGGCTAGGTTTCCTGCTACAGTCACTGTGAATGTCGCACAATTATCAATTTCCACAACTTTTTATCACTCTAAACAGAAACTCTATGAAAACAAAAACTTCCCATTTCCTCGTGTTACTGACACCTGGAAACCTCTATATTATTTTCTATCTCTATCGATTTGCCTGCTGTAGATATTTCATATAAATAGAATCATATGGTTTTTTTTGTATTTCATATAAGTAGAATCATAGGATATTTTTCTTTTTGTGCCCGGCTCATTTCCTTTAGCAACATGCCTTCTAGGTTCACCCATGTTATAATAGCAGACAGCCTGCATTTAAAGGCAGATTCCCTTGTATGTGTCTGAGCCA
n275695:4697379	1.41986	2.86462	3.56664	3.43555	2.00885	4697379	127	NONMMUT019913	2340	| AK081317 | mRNAlike lncRNA | Mus musculus | Mouse noncoding transcript | FANTOM3 | C130004N09 | http://fantom3.gsc.riken.jp/db/annotate/main.cgi?masterid=C130004N09 | -0.2688040 | -0.2992953	NOCODE4.0		chr14	21643008	21645346	+	TATGTAAGTAAGTATGGGTTCCCTCAGAGATATTTCACCACCACCACCCCCAGCTGGAGTTACAGGAGATTGTGAGATGCCCCACATAGGTGCTGGACGGTCCTTGGGAAGTAAAATATGCATTCTT
n275720:4550871	2.89148	4.99867	4.63125	6.09846	4.01448	4550871	880	NONMMUT006571	3535	| AK140745 | mRNAlike lncRNA | Mus musculus | Mouse noncoding transcript | FANTOM3 | C130001F24 | http://fantom3.gsc.riken.jp/db/annotate/main.cgi?masterid=C130001F24 | -0.1411270 | -0.4029148	NOCODE4.0		chr10	83400348	83403881	-	TTCTCCACAAAACGCTTCAAAAACATATTAATTCGTGTGACGAGCTGGTAGGTAAGTTGACTCATGTCCTGATTGTATTGACTAAAAAACTAAATTAAATTCATGTTTTAGATCCATCCTTACTTGTCATTTTTCCAGTTTAGACTAGCTTCTAGCCTTTTAACTTTATGGCAATAGTACATCAGAGACTGTATATTCAGACTTAGTAAAATTAGTCATTTAATAGAGTCATAATGATTTTTCTCCTTTCTTCAGTGTGACCAGCCATTCTAACTCAATCTCAGACTGGTCTAATATTCAGTCCAATGTTAGAGATTCCTATATTCTAAATTACCTAGCAAAGTTAATTCAGAGCACATCCCCCACTTCCCCTAGATCCATAACCTCAGAAGGATTGCT…
n275737:5437150	5.6824	3.25078	3.45359	3.19953	4.88391	5437150	1251	NONMMUT004126	2405	| AK047804 | mRNAlike lncRNA | Mus musculus | Mouse noncoding transcript | FANTOM3 | C030047B02 | http://fantom3.gsc.riken.jp/db/annotate/main.cgi?masterid=C030047B02 | 1.8733300 | -0.2893231	NOCODE4.0		chr1	182288114	182303247	+	CCTGTGTTGCTAGCTGATGACTTTCTTAGCCTTTGGGTTGGTGGAAGCTGGGGATCTGATTTTACTTTCCAAAAGAATCTACCTACCAGTTGTGGGGGAGTTAGATCATAAACAGAGGTAGGCAATAAATAGCTCTTAGGGCCTAATTACAGCCCAAGATAAACTGTGATTTGGCTCCTAATTGAAGTTAGACTTGAAACACTTTACCTCTTCACAGTCACTGACATTCGAATCTGCTAATCAGCCTTTAAAGAGGGTTCAATAGTGGGTACAGTTTTGTTTTGGAAACTTTTGTTGACAATACATAAAAGGACATTCTCATTTTACAGCTGCCTAATCTCTTGTCACAAGGACAGACCACAGTTTATATAGCCAGTTCCCTACTGATAGACAATGTGA…
n275779:5566482	4.08248	2.98563	2.79926	1.80417	3.4327	5566482	567	NONMMUT066494	1658	| AK047786 | mRNAlike lncRNA | Mus musculus | Mouse noncoding transcript | FANTOM3 | C030039E23 | http://fantom3.gsc.riken.jp/db/annotate/main.cgi?masterid=C030039E23 | -1.1767600 | -0.3333919	NOCODE4.0		chr8	86715556	86717214	-	GGTTCATGTTCACTGCCGAGCGCATCTACCTTTTACTGAACCATCACTGACTTAGACATTCAGCCCACCTCCCACCTTGGGATAGTATGAGCTGGGAGGCCACTGAAAAGCTTAATGGTAACCTATATTAAAACCTTTTAAGGAGAGAACCTGTAACCTCGATGGCTATGGATAGTTTTAATTGTCATTTGCAGCCTTGTGTTTAGGTTGATTGTGCTTGGTTCTACTATTCCTAGCTAGAAGAAAGAAGTCTGAAGATTTTACCATAAAGAAATGACAAATGGAGGAAATATACATGCTGATTTAAATGTTATGCAATGTGTACATGCATTGAACATCATGCTATCTCAATACATACCATTTTTGTTTTTACAAAATAAAGATTTTTAAGTTAACCAA…
n275810:5194297	6.09778	6.44855	4.57213	3.6777	4.60196	5194297	344	NONMMUT019471	2181	| AK047772 | mRNAlike lncRNA | Mus musculus | Mouse noncoding transcript | FANTOM3 | C030034A15 | http://fantom3.gsc.riken.jp/db/annotate/main.cgi?masterid=C030034A15 | -0.9727950 | -0.4235951	NOCODE4.0		chr13	117985229	117987410	+	GGCAGGCAGGCTATCTAATAGTCTATCCCTTTCATTACCTTACTACTGAGACTGTGACCCATGGATTAGCAACATTGGAATCTTCCAGAGTTTGTACTAAGAACAGGATCCTAGGCCTGATGCCACACAGGCAGAAAATGTGCTTTCTAGCACAGTCCTGGGAAATTAACATGTGTTTTACTATGAAGATCCATGCACATGGTAAAGTCCTAGAAGAGGAAAAAATTTTCATGTAAATGGATGTTTCTGGGAATGGCACTTCACAATAAAGAACCATGGCTACACAGGAAGAATAAGGGGGGCTCAGATAAACATTTAGGTCCTGACAGTCATGACCAATTTTA
n275818:5424389	6.96225	6.53528	6.04578	4.71338	5.91541	5424389	177	NONMMUT062609	231	| AK021113 | mRNAlike lncRNA | Mus musculus | Mouse noncoding transcript | FANTOM3 | C030032F19 | http://fantom3.gsc.riken.jp/db/annotate/main.cgi?masterid=C030032F19 | -0.3596540 | -0.1584088	NOCODE4.0		chr7	87586510	87596137	+	AAGATTGCTGTACATGCCGCCCTCAGCTCCGCTGTTCTGAGCACTCCGAGCACAGGGGATGAGCTTGGGATCATCTTGGGGTTGGGGAAAAGCCCAAGAAAGGAAAAGCTGGCTCAACCCCATTGATTTCTGCTGCCCAACTTTACTCCGGGGGGCTAGCTAAACAGCATCTCACTG
n275849:5398250	4.38863	3.11572	4.43294	2.37539	4.30439	5398250	358	NONMMUT056400	1710	| AK047747 | mRNAlike lncRNA | Mus musculus | Mouse noncoding transcript | FANTOM3 | C030023B16 | http://fantom3.gsc.riken.jp/db/annotate/main.cgi?masterid=C030023B16 | -1.1446100 | -0.2917063	NOCODE4.0		chr6	37268230	37269939	-	GCTCAGTTACCAGGAGAGTCTTCTGTAGATGAGATCACCCATTTCTACCCGCTCCCTCCATCTACCATTGTTTCTGCACAGTCTCCTTCACTCTACGCTGGAGATCTGGAAAAAAAGAGGGTAGAAGAGACTGCAGCGATCAATAGAGGCACTGAAGCTGTCCTTTGAGGTTCACCACTGTTTCCTGCATTATTTTTATATTTAGCAAAAAAAAATCCATTTTGCCTCATTATGAGCATATTTTCCTTTTGGCTTTCACTTCCGAGGTTATTTCAAGGGAATTATATCCAGAGATTAGTCACATTTACCCACATCTCACTCAATAACTATTAGAGCTATTAGATACCCTGAGCCAGGA
n275850:4371210	6.45434	5.4124	5.46644	4.08809	4.90167	4371210	1216	NONMMUT072616	2870	| AK047748 | mRNAlike lncRNA | Mus musculus | Mouse noncoding transcript | FANTOM3 | C030023E24 | http://fantom3.gsc.riken.jp/db/annotate/main.cgi?masterid=C030023E24 | -1.1726500 | -0.3939582	NOCODE4.0		chrX	61191292	61194162	+	AGAGTACTGGTCTTCCGGGCATTGCCTTGCTGCCTTTGGAGTTAAGATCCCAGTATACATACAGCCCATCTATATGCAGTAGTTTCATACTCTGCCTTTCACCACACCATCTGTATGTCACTGTGTTTGTGTAATGCAGTGCTGGGATGGAGCCTGGCCAGAGCTTCCTGTATGCGGAATATACGTTCTGCCTCCTGAGTCACATACTCATTCCCTCGAATTATATTACAAAGATAGCTATTTTATCTCAGTTAGCTTTCGGTTGGGGTTTTCTTTTTCCGTCCTTTAAAAAATTTCTCTAATTTCTACTCATGCTATTTCACATATGGAGAAAGTATCTCAATTGTAAATAATATAATATAAATATATAATATGGATAATTTCTTTGCATCTTATATG…
n275904:5501861	6.18028	4.87948	3.40896	2.56985	4.67877	5501861	548	NONMMUT048391	1571	| AK047704 | mRNAlike lncRNA | Mus musculus | Mouse noncoding transcript | FANTOM3 | C030014L02 | http://fantom3.gsc.riken.jp/db/annotate/main.cgi?masterid=C030014L02 | -1.1425200 | -0.3131738	NOCODE4.0		chr4	102975869	102977440	+	GACTCCACAGGTTGGTGTTTAATTACTGCTTTTTAAAATGAACATGCATGGAAGAGATGGGTGCCTCTCCCTCTGTCTTCCTACCCCTTCCATCCTCCTGCATCCTCCTCCCATCTCCCCCACACACACCCCCACCCCACTTGGCCCCTTAACTCAGTCAAAGGGACCTGGATAATTGCTGTTGAATGATCATTTTGGAACCCAGCAGGAGCTGCAGCGGTAACACTAGAGCCCTCCCTACTAGCAGAGGAGGAATTTCCAGGGCTGATTTTAGGCTGTTTGAACACTATTGTGTTTCAAATGAAAAGGTTTTCTCATTAGTTTTTCCCTTGTGTAGGGCAAAACCTCTGAATGAAATGACCAGTTTGAATCATCAGTTCCTAACAAGTGGCAGTGTAA…
n275929:4490359	4.52883	3.02252	2.5225	2.41023	3.14177	4490359	283	NONMMUT001312	1695	| AK047690 | mRNAlike lncRNA | Mus musculus | Mouse noncoding transcript | FANTOM3 | C030011F20 | http://fantom3.gsc.riken.jp/db/annotate/main.cgi?masterid=C030011F20 | -0.1835280 | -0.3455770	NOCODE4.0		chr1	66384613	66386307	+	CCCTTGCAACTTGGTTTCATTCTGAATTGTCTTTTCTCCAAGAAGAGATGTAATTTTTGTGTATAATTTATCATTCATTTACATTCTAAGCAGGCTGCCCACTGACAAGTCTTTCAAGATTCCTTTAGATTAGAGGTTTTATTGTTTTGTTTTGTTTTTGTTTGTTTGTTACCTGAAAGAATTAATCTTGTAATATCGACCTTTGTCCATCTAGAAGACTAGCTTTCCATCTTTCTTGGGTGTAGTCATCACCTGAGACCATGTACTACAGGGTCCAAGCTCC
n275947:5277545	7.34484	5.55071	5.10338	4.55907	5.82784	5277545	227	NONMMUT004524	1510	| AK047671 | mRNAlike lncRNA | Mus musculus | Mouse noncoding transcript | FANTOM3 | C030008K18 | http://fantom3.gsc.riken.jp/db/annotate/main.cgi?masterid=C030008K18 | -1.1957600 | -0.3319598	NOCODE4.0		chr10	6858515	6860024	-	GCACGTCATACATCTGAAATTCTGGTAACCAATGACAGTGTTTCAAAATAGTCTATACTGTTTCAGCAGAGAAAAAATCTAAATATAATCATAAATCTGATTAGAATCTCATGTAGTTAAGTACACATATTTTAAGTAGATCATTGCCTGGGAGCTGCATATCTCTCCAGCTAAGCAAGTGGAGGCAGAAAGGTCCTTCCTTGGACCATAGTGTTGAGTCTACTCTA
n275976:5004572	4.38808	3.17229	3.11878	2.04446	3.31515	5004572	666	NONMMUT011045	1726	| AK047648 | mRNAlike lncRNA | Mus musculus | Mouse noncoding transcript | FANTOM3 | C030004L23 | http://fantom3.gsc.riken.jp/db/annotate/main.cgi?masterid=C030004L23 | -0.7779060 | -0.2454863	NOCODE4.0		chr11	81512089	81513811	-	TCTGGGATCTACTCTACCTCATATGCCCAATTTCATACCAGACAGGAGCCTTTCTGAACCTGCTCACTCCACTGTAAGCTAGAGGAAAGGAGAGGAGCTACCCAAGGGGCTACTAGGAGCTTGACACCCCACCATGACATGACTGCTCCTCAGTGTGTTCACTATGGCTAATGAAACTGTACAGGAGTTTAAAGTGGACCCCAGAGTACTAGACTCTGCTTACATTGCCCAGCCAGCACTCCCAGAAAGACTCCAGCAGGACCACACATCCCTTTCTTCTTTCTTGCCTCACATCAGACCCTGAGAGCATCCTCTGCCTTCCTCCACATTTTTTACTTTCTGATCCTGTTGTTTTAAGACCTAAATACTAGATAGACCCACTACCCCATATTCCAGTTC…
n276017:5448156	6.15406	4.80805	5.36267	4.05798	5.59706	5448156	478	NONMMUT047992	1622	| AK047606 | mRNAlike lncRNA | Mus musculus | Mouse noncoding transcript | FANTOM3 | B930098M14 | http://fantom3.gsc.riken.jp/db/annotate/main.cgi?masterid=B930098M14 | -1.2646300 | -0.2598252	NOCODE4.0		chr4	87102612	87104234	-	AGCCACCACACTAGAGGGACTCTTCATGGTACCATGGAAAAGGAAATTAATTTTAGCTGGGAAAATCTTGGAAGACTCATATTGAAAGATGTCAGAGTTAAAGACAGGATGACATTTAGACTTCTACGGGGAGATGGCCAAGGAAAATGCACCAGATAAAAGAGAAGCTGAAGACGTTACAATGTCTTCCTTCAAAGAGGGGCATGCGTGCATGCGTGCGTGCATGTGTGCGTGCACGTGTACGTGTGTGAACACTGGTGGGAAGTACTTAAAAAGACTGGGTAAAGCTGCATCTTCAGGCCTTAGAGCCATATTTTCATTGTAAATGTGTGAAAGACTAAGGTTGGGAAGGAAGAAGAAAGTGTGTCTCACTCTTGTCCCTGTCTAATTGCTCACATG…
n276036:4541078	4.55809	3.12482	2.45768	2.33861	2.86979	4541078	159	NONMMUT055912	4704	| AK140700 | mRNAlike lncRNA | Mus musculus | Mouse noncoding transcript | FANTOM3 | B930096G07 | http://fantom3.gsc.riken.jp/db/annotate/main.cgi?masterid=B930096G07 | 1.9026200 | -0.3318883	NOCODE4.0		chr6	21306380	21311083	+	TTTGGCTCTATCACATTCACTTTGAAAATGGACTGAATTCGAGTTTAGTGATGCATGCCTTTAGTTCCAGTATATGGGAGACAAAGGCAGGTGGGTTTCTTTGAGTGTGGGGGCAGCCTAGTCTACATAGCAAGCTTCAGGAAAGCCAAACGTACATAG
n276036:4566864	4.01026	2.92798	2.52449	1.90738	3.01373	4566864	222	NONMMUT055912	4704	| AK140700 | mRNAlike lncRNA | Mus musculus | Mouse noncoding transcript | FANTOM3 | B930096G07 | http://fantom3.gsc.riken.jp/db/annotate/main.cgi?masterid=B930096G07 | 1.9026200 | -0.3318883	NOCODE4.0		chr6	21306380	21311083	+	ACAACAAGGCACACTTCATCTCTCATTGATCCATTCTATTTTCATAAAGTGGACTTACTAATATGAAGTAAAGAGGTAAATTTTTAAGAATTCCTCTTAAATGATGAAAAATTCTTAGTTTTGGAACATAATTCTGCATTCTCCCAGCTTTTATCCAAGGGGAATTATGTACACAGTGTTTCCTGTCATGAACAGGATAACTGTCCCTTAAGGGCCTAGATA
n276049:4870251	8.91361	7.51194	7.2709	6.80254	8.03758	4870251	271	NONMMUT030206	2805	| AK081162 | mRNAlike lncRNA | Mus musculus | Mouse noncoding transcript | FANTOM3 | B930094M09 | http://fantom3.gsc.riken.jp/db/annotate/main.cgi?masterid=B930094M09 | -0.9990260 | -0.2709101	NOCODE4.0		chr17	63054080	63056096	-	TCCTCCCTCTTGGTGCAAAACTCAAGATCAGGGAAAGATCTCACTAAATGCTAATTACACAGTATTTTGACGTTTGTAAACTTCAACCTTCTTATGTATAGCTAATGCATATTTTACAGTTTATCTCACGCTTAACATTTTTCAACCTGTCGATTATATAGGATTTAAAGTCTGGTCTTAGAGCTGGATATGTTGACAAGCCATTGAGTTTCTTTATGTACTATAGCCTGGGGCAGGGCTGCTGTTGATTTATTAGGGTTCTTTGCACACA
n276052:4654776	7.23655	6.31614	5.99202	5.20908	6.60129	4654776	2362	NONMMUT004848	3266	| AK047584 | mRNAlike lncRNA | Mus musculus | Mouse noncoding transcript | FANTOM3 | B930094H20 | http://fantom3.gsc.riken.jp/db/annotate/main.cgi?masterid=B930094H20 | -1.1543700 | -0.3908967	NOCODE4.0		chr10	18581845	18585107	-	GGTTCCAAGCCACAAATGCCCAGGTTTCTGATTCTATACATTTGGCAATTTGCATTTCCAGCAGGCTCCCAGATGAAGCCACTGCTGCTACTCTGGGAACCCAAGGGTAGAAATCATTTACTTTCAGATCAGCCTGACGTATCAAGCACTAATCTCAACTGACCCGTGGGCAGACAGCATGGGATTAGATTACTTACAACATTCCAGTTCACCCTTCTCAGTTTTATTGTACGACAATTGGTTCTTACACATTAGAAGACAATGAATGTATACCTTCTATGGGACAATGAGATAGCTATAAACTCATCTTTGTATTTATAAACATTAACCCTATTAATGGTTGATTGTATCCTGTTGACCCTTTGACTTGTATTGAAGGTGATCTTAAATTTATATGGT…
n276126:5523618	6.04441	4.88698	5.51032	3.83461	5.59429	5523618	586	n276126	3641	| AK047548 | mRNAlike lncRNA | Mus musculus | Mouse noncoding transcript | FANTOM3 | B930086L21 | http://fantom3.gsc.riken.jp/db/annotate/main.cgi?masterid=B930086L21 | -1.5906100 | -0.2084676	NOCODE3.0		chr1	132614023	132624512	-	CCGCTAGTCATCGTGTGGGAGATTCCCGTGTCCCTAAGAATCCAGCGGAAATGCTCTGGATCTCTTCATTCCCCTCCCGCCCCTCCCAGGTTCTTGGCTCTGAGCTTATTCCTTGCCTCCAAGGAAAGCGGGGATCTTAGATGCTGAGAATAGCAAAACAGACCAGAGCAGTTCACAGAGGACCAAACGCCCTTCTTCACCTCTTGGCCTTGGGATTTTGGGTTTCTTTGATTGGAATTGTTAGAAACATTGGGAAACTGCCTGTGAGAAATGGGGACAGAGTAACATTTCCAGCTTCAGACTCAGCGGCAACCATGGCAACACAGCTCAGAATCCAAATCTGAACCTGTGAGCTTGGGCAAAGTCTGTTAACTTCATAGAAACTCAGTTTCCTTTGCT…
n276128:5072101	4.86303	3.62783	2.98712	2.0533	4.04753	5072101	750	NONMMUT051355	1044	| AK047544 | mRNAlike lncRNA | Mus musculus | Mouse noncoding transcript | FANTOM3 | B930086K05 | http://fantom3.gsc.riken.jp/db/annotate/main.cgi?masterid=B930086K05 | -1.0579000 | -0.4852147	NOCODE4.0		chr5	19413064	19414108	+	TGATGGATTTCACACCCTGGGCTTATCCAGCTGTTTGATTGTGTCCTTTAAAGTTTTAACTTCATGGTAAATATATCTTAAATATATATTGTTAACAGTTATTAATTAAAAAGCAAAATAGTATTTGAAAGATACTTTCCAAAGACCTATGATATTTTTTGTTATTTGTGAGCATTTGTTGTTATTTGTGAGCATTAAGTTGTCTGAATGTTACTGTTTCATCTACATTATTCAACAATAACTCTATTCAACAATACTGTCAGCAGTATTGAGAAATGAATATTTAAAGTAATGAGTAAGCTAATTGACGTGGATTGTGACATCAGGGGAAAAAAACAGGAAAACAACAAAAGAAGCAAGTTTGGAGTAAACACCAAAAAATCCCAATATGAGAAAACT…
n276144:5391691	6.03332	5.21701	4.57823	2.55424	4.94631	5391691	1037	NONMMUT036703	2619	| AK081091 | mRNAlike lncRNA | Mus musculus | Mouse noncoding transcript | FANTOM3 | B930084M06 | http://fantom3.gsc.riken.jp/db/annotate/main.cgi?masterid=B930084M06 | 0.9931410 | -0.2172428	NOCODE4.0		chr2	32377096	32381862	-	GGCACTAGGGCCTTTCGCCACCATAACCCTCCCCCCCCAGGATTTGATGGTAAACCTCAGTGCTTTCCTCACCCAGCTGGCACTGGCAGAGCCAGGCTGTCTTTACCTCCAGCAGGGCTAAGGATGGCCCCTCACTGCTGCTGTCTCTGGGTTGGGAGGGCTTTGCCCTCTTGGTGAACCAAGAGCTGAACCTCAGTGGCAAGGATACCCTAATACTAACTCCATGCCTGGCTCTGGTTTTTGTGAGGTGCAGCTGGCTAGAGGCTGGCTGTTAGCCAGTCTTTGAGTTTTGGCAAGTCACGTGACCCTGCTAAGGCCTCTATTCATCTCTAACCTGAGAGTAAGAACAAGGCCATCTGCTAGGGTCACCAGCCATAAGGATTTTCTCCCAAGCTGCTG…
n276151:4567374	7.88596	6.42726	6.20284	4.65935	6.84035	4567374	442	NONMMUT014958	2633	| AK047529 | mRNAlike lncRNA | Mus musculus | Mouse noncoding transcript | FANTOM3 | B930083M08 | http://fantom3.gsc.riken.jp/db/annotate/main.cgi?masterid=B930083M08 | -1.0035500 | -0.2104084	NOCODE4.0		chr12	83159422	83162055	+	CCCTTGCTGGTTGTGAAAATCGGTGGTTTTCCTGAAATGCGCCCTCCTGTTCTATTCCACATGTGTGGGCTTCAGAAGGCAGCACCAAGAAGCCTTTCCAGAATGGGGAAAGGATTGAGGGCTGTTCGTCTTTGGGCCCTGGAGAATTTCCTGGAGGAAAATGTTCCAGCAAGTTCCAGGAACTGGGAAGTCCAGGGCTAGGGAGAAATTCTGTGCCACCAGCCTCCAAAGGGACCTGGCTGAGATGAATTTGTGGCAAGGACTGTGGAATAGTTGAATAGTGGTCAAATAAATTGCTAATAACTCACCACTGGACTCTCCAAGAGAGGCCTGTGCTCATGTAACCATGGCAACAGCAGACGCCAGCAACCTACTCATTAGTGCCACCCAGTGATAAGG…
n276151:5264244	6.34054	5.41526	4.5535	3.76393	5.63747	5264244	573	NONMMUT014958	2633	| AK047529 | mRNAlike lncRNA | Mus musculus | Mouse noncoding transcript | FANTOM3 | B930083M08 | http://fantom3.gsc.riken.jp/db/annotate/main.cgi?masterid=B930083M08 | -1.0035500 | -0.2104084	NOCODE4.0		chr12	83159422	83162055	+	TCCACAAGTTGGTCCCTCACAGGGGAATCCTCCAGGGGCACTTAGAATCCTCCTTTCAAGATTCTTGGTCACCACATCTGTTTCCAGGTTAGTTCTCTTCTTGAGACATGGTGGAAGTCAGAGGGTGTCTCCAAAGGTGAGGGTAAACACCCAGACTCTTGCCAGCTGCTCCCGCTGAGCCTTGGTAAACCAGAAGTATCCACATGAGTAGTGAGTGGGAGAATTGAAGCCACAACCTAAGTTATGGGGTCTTCCAGCCCTGTCTCTCTAGCTCCACTTAAAACAAATAAAACAAAAAACAAAATCCCTCTACTTAGAACCCTCTAGTTTCTGAACCAAGTTGTAGTCCGAGTTCATCTCCATCCAACATTATTCAAAGGAAACTTCTCTACCAAGGGC…
n276156:5122654	4.85521	4.14584	3.66451	2.60926	3.81871	5122654	620	NONMMUT005138	2510	| AK047524 | mRNAlike lncRNA | Mus musculus | Mouse noncoding transcript | FANTOM3 | B930083D02 | http://fantom3.gsc.riken.jp/db/annotate/main.cgi?masterid=B930083D02 | -1.2533900 | -0.3296135	NOCODE4.0		chr10	29208396	29210904	+	TTGTTGATGTGCTTACTCCAGAGACAGAGACAGAGACAGAGACAGAGACAGAGACCAAGAGAATATGTATGTATGTACATATATTTACAAAATTATTCAGCAGAAAGGGCTAGAAGATATTCACATTAGTGTTAAATTTGAAGTGACTCATTGGCAAACCTACATACAGTATAAGAAGCTAAAAAAAAAAGGGGGGGACTGTAGTTCTTTTTTATTAGCACAGGAAAAAGGATATTGAAAAAGCCACAGGGAAGACCAGAGTCCATAGCACAACATAGCTTCTGAAAGTCAGCCAAATGCTATTTGACTTTCTGATAGAATTATGGAAAAGGCCTTTTGTCTTTCTTCTCTTCAGTTATTGTTTATGGGTTTGTGTCTGTTTGTTTGGAGAGCAGGATC…
n276210:4537098	6.64494	6.19927	5.76509	4.43484	5.60196	4537098	253	n276210	1276	| AK081055 | mRNAlike lncRNA | Mus musculus | Mouse noncoding transcript | FANTOM3 | B930076D07 | http://fantom3.gsc.riken.jp/db/annotate/main.cgi?masterid=B930076D07 | 2.5381900 | -0.0973096	NOCODE3.0		chr10	69706477	69822635	+	CCTTGGGTACCTCTAATCAGGCATAGAGCAGCATAGCCCTCGCAGGAGAGAAGCCTGAGCAGAAAGGCATCCAAGAGGCAGAGAGGCAGAGATGCTGGGGAAACTGCAGCTTTCAAAACCCACCACAGCAGGGGCCAGATCTCATCCTACACCTTGCTGAGCCTTCCCCTCTGGAGGAGAGCACAGCCATCCTGGTGCAGAGGCTGTAGTGGAGGCAGCTGGGACCGGAGGAGCTGTGTTATGGCCGCATCCC
n276210:5476181	10.0274	9.77075	8.86882	7.68659	9.03023	5476181	68	n276210	1276	| AK081055 | mRNAlike lncRNA | Mus musculus | Mouse noncoding transcript | FANTOM3 | B930076D07 | http://fantom3.gsc.riken.jp/db/annotate/main.cgi?masterid=B930076D07 | 2.5381900 | -0.0973096	NOCODE3.0		chr10	69706477	69822635	+	GAAATCAATGCGGAAGAAGAGACTGAGAAAAAAAGGAAACACCGCAAACGGTCCCGGGATCGCAAGAA
n276225:5125709	4.34911	2.92239	2.55629	2.28151	3.26182	5125709	359	NONMMUT024677	2920	| AK047473 | mRNAlike lncRNA | Mus musculus | Mouse noncoding transcript | FANTOM3 | B930074F24 | http://fantom3.gsc.riken.jp/db/annotate/main.cgi?masterid=B930074F24 | -1.2008200 | -0.3644056	NOCODE4.0		chr15	92086224	92089143	+	GCTCACCCTGGTTCTCTTGGACCTATGCTCTCTGTCCTTCTTTCCACATTCAAGGACATTTAAGGTAAATATCTAGAAATAGTAAAATTTTTAAAAATGGTTTTATTAATTTTTGAGAGTTTCAGACAATGTATTCTGAACATATCCACCCCACAAACAAGTCCTGTCTTAACACAAGTCCACTTCGTGATACCAAGCTATGTCTTGGGATTGAGGGCTGCTCTGTTACATGGCCACACTATCAGGGACCAGATACCAAATCAAACCCAAAACGCTGAGTCTCCCTCTCCCAGCAGCAATCCTATGATAAATAGCTCAGATTCAAAACTACAATTGCTGATGCCCTTTCACTAATACTG
n276227:4478944	2.24119	4.30087	4.75359	5.68585	4.46368	4478944	287	NONMMUT049816	1138	| AK081044 | mRNAlike lncRNA | Mus musculus | Mouse noncoding transcript | FANTOM3 | B930073O20 | http://fantom3.gsc.riken.jp/db/annotate/main.cgi?masterid=B930073O20 | 0.0026565 | -0.2778244	NOCODE4.0		chr4	132216491	132217622	-	GGCCAACCTGAGTAGCATAGCAATACCTTATCTGAAAAGATTTTTTTTCTGAGTACAATGGTACATACCTTTATTTCCAGCACTCAAGAAACAGAGACTCGTGGATAAGTGAGTTCCAAACCAGCCTTATCTACACAGGGAGTTTTACCAGCCAGGGCTACATAGTGAGATACTTCCTCAAAATAAAATAAGTGAAATAGTAAAATAAAACTTGAGACAAGGTTCCTTGTAGCTCTGGCTCCATGCAACTTGTAATATAGCTGAGGTTGACCTTGCCTCTCCCTAAA
n276255:5156841	3.84735	2.1795	2.1918	1.44887	3.02138	5156841	99	NONMMUT055118	1111	| AK081018 | mRNAlike lncRNA | Mus musculus | Mouse noncoding transcript | FANTOM3 | B930068C02 | http://fantom3.gsc.riken.jp/db/annotate/main.cgi?masterid=B930068C02 | -1.5906100 | -0.1436730	NOCODE4.0		chr5	142871775	142872884	+	GCTCTGAGAAAGTACCTGGGTTATGATGCTCACCGCTGTCCAGTCCCAGGAGCTCCAACTCCCTCCTCTGAACCTCTGCCCACACCTAGTACACACATG
n276349:5179715	2.66825	3.7494	4.36323	5.68373	4.50055	5179715	195	NONMMUT026766	2900	| AK047367 | mRNAlike lncRNA | Mus musculus | Mouse noncoding transcript | FANTOM3 | B930053I17 | http://fantom3.gsc.riken.jp/db/annotate/main.cgi?masterid=B930053I17 | -0.6803580 | -0.1703256	NOCODE4.0		chr16	45094012	45096910	-	ATCAAAGCTGGATTTCCTGCTTAAAGACTGACTCTGCTAAGCACTGACAATCGCAGCAGTTTAAGAGAAGCCCTCTCTCTGTTTGCCCTCCTCTGCTTGCCCTCCTTTTTCTTCTTTAACTATCTCCTGCCCTTTCTTTTTGGCCAAGTTAGAGAAAGAGATCATGCCCAGCTCTGCTTGCAATTAATGACTTTT
n276397:5044851	4.67655	3.93684	4.33917	2.08518	3.17042	5044851	645	NONMMUT063110	3025	| AK140608 | mRNAlike lncRNA | Mus musculus | Mouse noncoding transcript | FANTOM3 | B930047K20 | http://fantom3.gsc.riken.jp/db/annotate/main.cgi?masterid=B930047K20 | -0.8766270 | -0.2660557	NOCODE4.0		chr7	105803217	105806241	-	TTTCTTTACCAGTGGGCCAGTTTCACACTGTACATCTTTTATTATAGTGACTGAATAACTCTACTTTTAAAACCCTTCACTAAATAGTGAGTTCCTCGAGAAAACACATCTAATTCATTTCTCCCACCACCCAATAAAGAACATGAGACAAAGTTGGCATCAACTGTCTATTGAATCAATCAATGTGTTTTACAGACTTCTTCAGCCTGGATGTAACAATTTTTTGCCTATGAACTCCTCCCTTCCCCTGTTTCCTCCTACTTCATCTGAAAAAAGAACTTCCTGCAAAGCTGACTCCCCATTGTTCACCCTGGATAATGTCTGTACCCTGAAGGCTCCTTTCTGTATGCTCTTAGATGCATGGGCATGGTGCAGATGTCCTCTGACTTTTCAGCATAA…
n276420:4306288	2.21135	4.24373	3.87254	4.4298	1.54473	4306288	103	NONMMUT052074	2215	| AK047282 | mRNAlike lncRNA | Mus musculus | Mouse noncoding transcript | FANTOM3 | B930045E16 | http://fantom3.gsc.riken.jp/db/annotate/main.cgi?masterid=B930045E16 | -1.2080000 | -0.3143385	NOCODE4.0		chr5	39458096	39477679	+	AGCTCTGAGAGACTTTGAAATCACCTCCCTGACCCAAAAGGAGACTGGCACCAACAAGCATCAAACTGTTATGGATAAAGGAGCCAACTTAGAAACCTGACAG
n276429:4921781	5.78331	4.83741	4.31826	2.79205	4.48102	4921781	290	NONMMUT005924	2528	| AK047266 | mRNAlike lncRNA | Mus musculus | Mouse noncoding transcript | FANTOM3 | B930044F08 | http://fantom3.gsc.riken.jp/db/annotate/main.cgi?masterid=B930044F08 | -1.1182500 | -0.3577290	NOCODE4.0		chr10	64037771	64040299	-	CGAGCTAGGATCCATGCAGCATCTCTGAATGCATTACATCCTCTGCTTCTTACAGAAGTCCTATGGTAGACATTGTTGTACCTTGTTTCACAGATGACAGTGACGAAACTCAGATAGGTTTTCTATCTCGCTAGTGCTACCTACTCCATAGTGGCTTTGTCTCAACTCTTTTCACTGGAGACTGTGTCCTTAAGCACTCATCCCATCATCAGACATTCACTTCACAGGTAAAACATGCCAGGCATTAACCCAGATGCCATGGACCACCGAGCCCACTTTCTACATCAAGG
n276453:5105842	4.67914	2.92581	1.995	2.19862	3.31913	5105842	684	NONMMUT047865	910	| AK047237 | mRNAlike lncRNA | Mus musculus | Mouse noncoding transcript | FANTOM3 | B930041D05 | http://fantom3.gsc.riken.jp/db/annotate/main.cgi?masterid=B930041D05 | -1.2410100 | -0.3295903	NOCODE4.0		chr4	82363018	82363925	-	TACCCAAGCGCTGGGCTGTTTCTTCCTCTCGGTGTCTGACTTAGATGACTCTTGTTCATCGAAAAGGTTGTGCTGTGTATAAAGACACATGAAATGCCACCACCGTTGCCTGCTTCCCACCCACCACCAGCCTTTGGGCTTAGGGACAGTAGGCATTATTACGGCTGCTTGCCAGTGTTCCCTTCATCAGATCTCTTGATGTGCTATGCAGCAACAGAGCTCAGTGGATGCTAAGGGGTTGCATTTTATCATCTGGGTTCTGATATATTTCCATTATTTTTCATAGTTTGGTAGAGGAAAAAAAAGCTTTCATTTTTACTTGTAGATTTCAAGTTCTCACCACCGAGGAATCCCCATCATCTCCTGTTTGACTGCCTAGCTTGCTGCAAAAAATCTGCC…
n276484:4648052	1.71019	5.34436	5.10562	5.23643	1.88267	4648052	88	NONMMUT000929	2699	| AK140579 | mRNAlike lncRNA | Mus musculus | Mouse noncoding transcript | FANTOM3 | B930033F22 | http://fantom3.gsc.riken.jp/db/annotate/main.cgi?masterid=B930033F22 | 0.6179690 | -0.2947041	NOCODE4.0		chr1	54152396	54155096	-	CTTTAATCTGTTTCACTTGTGGGAAATAACCCCAGTGTCCAGCTTCAGAGAGAAAGTGACGTTCCATTTAGACTTCCAGAGAAGGCTG
n276490:4429080	4.18526	2.85983	2.62205	1.8399	3.33718	4429080	367	NONMMUT038059	1606	| AK047186 | mRNAlike lncRNA | Mus musculus | Mouse noncoding transcript | FANTOM3 | B930032K17 | http://fantom3.gsc.riken.jp/db/annotate/main.cgi?masterid=B930032K17 | -0.9083940 | -0.3049199	NOCODE4.0		chr2	76562465	76564071	+	CCAGCCGCTGGTATCAGAAGGTTTCTGAGCCAGGCTTCCTCCCTGCTTCTAGGAAGCCTCGAGGGTCTATCCTGAGCAGAGGAGCAAGGCTCACACTCAGCACTGAAGAGTCACAGCTCTGAGTGTGAGGAGCGCTGGCAAGAAGATGGTTACCACTTAAAGTGCTTTCTATCCAAATGCCGTCCGGTGTCAATGAATGAAAACTGAGTGAGTCCCCCCAGGCTGAAGAAATAGTCAGTGAGATGAATACATCCTGATTTATATTCTCTATTTTCCAAATTTCTCGATTAAAATGACCCATCCAACACACTTCTTCTCAGGAAAAAAAAGATAACTATTTAATTCGCTCGAATGTGTACAAAAATAG
n276558:5201884	5.02383	3.72733	4.74956	2.98899	3.96617	5201884	456	NONMMUT042294	3616	| AK047109 | mRNAlike lncRNA | Mus musculus | Mouse noncoding transcript | FANTOM3 | B930022D10 | http://fantom3.gsc.riken.jp/db/annotate/main.cgi?masterid=B930022D10 | -1.2531400 | -0.3421886	NOCODE4.0		chr3	25821669	25825283	-	CAGTCGGTTGCGATAGTGTATTATCTTGAAGATTGGGGGATGAATTTTTTACCCCTTTAGTCTCCGAAATTAATTGGTATAATAGCCATGATTTGCCTGCTTCCTCTCTCTTGTATGCTGCCTAGTTACAGAAAGTTTTAGCCTCAGCGTGATAAACAAAAATGGTAGTATTTACTACCATTCACAATCAGACCCCAAACCCAGAGTTTTGGGCTGCTGAGATGCCCCATAGGTGCCTAGATTAAAGAGCTCTTCACCCTCTGGCGTTTCATCTCTCTTTTTAGAATTCTCTAATTAGAGTTGCCTTACTTACTCAAGCAACCAAGTCAGAAACCTGAGTTTAAGCTTGAAGAACAATGGACAGAACAGTATCACTTAACTCTATCTTTAGAGTTAAGT…
n276570:4441066	2.96023	4.77219	4.8313	5.02346	2.54435	4441066	2282	NONMMUT072297	3512	| AK081008 | mRNAlike lncRNA | Mus musculus | Mouse noncoding transcript | FANTOM3 | B930020H05 | http://fantom3.gsc.riken.jp/db/annotate/main.cgi?masterid=B930020H05 | 2.1588200 | -0.3002069	NOCODE4.0		chrX	47433036	47436547	-	GCTTAGGGCCTATCTCAAGGTTTCATGTGAATCAGTGCGGAAATGTTAGTTGATTTACAGTGTGGAAGAAATCCTATTTATCTAATATGTGAGATGCCTTTATAAAGCCTCCCTGGGTGGGGATTTAGAATGTTCACAGTGATTAGGGAGGAACACTGCCACTGGTATCAGTGTGTTGTTGTCTAAATCATTGGTGTAAATAATATGAAAAGTAGTATCTTGAAGAAATGCTGTGGCTATTCTCCCAGGACCTCAATCAACATGTTTACTGCCTTGCTTTATCTAATCTACTGCAGCTCTTTCCTAACATACTTTGATGGGTTCTAGCTATCTTTGGCTACAATAAACACCTGGTATATTTAAGCTTTTACTATTATTATTGCTTAGCTACATAGAATG…
n276572:5088355	4.386	4.9769	5.55579	7.1177	5.18964	5088355	53	NONMMUT020229	1895	| AK047101 | mRNAlike lncRNA | Mus musculus | Mouse noncoding transcript | FANTOM3 | B930019K04 | http://fantom3.gsc.riken.jp/db/annotate/main.cgi?masterid=B930019K04 | -1.5906100 | -0.1430577	NOCODE4.0		chr14	31129859	31131753	-	GCGCGGACCTCAGCGCGCACTTATGGGCTCGTTACCAGGACATGCGGAGGCTG
n276663:4589084	3.95379	3.16079	1.98465	1.9038	3.4142	4589084	88	NONMMUT057512	1665	| AK140490 | mRNAlike lncRNA | Mus musculus | Mouse noncoding transcript | FANTOM3 | B930010D14 | http://fantom3.gsc.riken.jp/db/annotate/main.cgi?masterid=B930010D14 | -1.0021600 | -0.3683699	NOCODE4.0		chr6	80319191	80320853	+	TCCTACATTGTTGCTCTCCTCATTCTCAGTTGTCAGTTGAGAATCCATGCCTTCATTTGGTTGCAGGTCTTTGACATGGGGTGCTTTA
n276692:4966949	5.77146	4.01949	4.20078	2.88257	4.44999	4966949	439	NONMMUT068327	3677	| AK046965 | mRNAlike lncRNA | Mus musculus | Mouse noncoding transcript | FANTOM3 | B930008C22 | http://fantom3.gsc.riken.jp/db/annotate/main.cgi?masterid=B930008C22 | -0.6811250 | -0.1860089	NOCODE4.0		chr9	22027657	22031334	-	CGCCTACTCCTAGAGGTGCTGATGAGGGTCCATCTAGGCTGATTGCGCTCACATGGCCTCCAGTCAGCTGCCTTTGTCTGAAGGAGGAATGGGACGTTACACTTCTCACTTTTCCGCCTCCACAGCAGTCATGATCCCGTCTGCTCCCAAGTCCCACAGCCACACACGCCAGGCCGGCACAGTCTTTTTCACCACGTCCTCCAACTTCACAGTGTTTCCTGGTCACTCTGTAAAGGCCCCATCTATACGCCAGGTCTCAGATCTCCCTATTTCCCATACTAAAGGTCAGCCTTGAGGGGCATCTTCTATCTCATCCTCTCCTTCATCTGACTTATTCCTGGATCCAAGGCTAGCAGGGAAACCCCGGCACCTTGCCTTTCTTGTTGCAGTTGTTCCTTT…
n276728:5398013	5.0496	4.45067	2.91789	2.75877	3.92459	5398013	562	NONMMUT015180	2381	| AK046917 | mRNAlike lncRNA | Mus musculus | Mouse noncoding transcript | FANTOM3 | B930002H01 | http://fantom3.gsc.riken.jp/db/annotate/main.cgi?masterid=B930002H01 | -0.1950100 | -0.3405884	NOCODE4.0		chr12	89655722	89658101	+	TGCCTTATATTTTCAGGAGTCAAGAACATGTTAACAATTTCTAGCATCAAACTTGTAAGTTTCCTGATCTTGTTCACATTGGCAAGTTCATCAATGAGTATTTTCTTAGAACTCTGACTTGTCAGTTATTTTCAGTGAATGTGATTAAATTATCTACCATGTGAGAACCCAAAGAGAAATATAATCTTCAATAAGCAACCAGTCCACAGAGATATAAAGATTTACATAGACATATTTATAAAGTGTTATAATATCACACTAAAGATGTACTTAGTAATAGAGTGTATTCCAGTCAGGAAAGTCTTCATTTACAAGATATTTTGAACTTTATTATTAAGAGTGGGTAGAAAAATAGTAAACTCATATTAAATAGTAAAAATCCTGGTGAATGTATGGACT…
n276776:5245171	4.06174	2.91437	2.81304	1.96339	3.0362	5245171	510	NONMMUT062345	1879	| AK046848 | mRNAlike lncRNA | Mus musculus | Mouse noncoding transcript | FANTOM3 | B830028K19 | http://fantom3.gsc.riken.jp/db/annotate/main.cgi?masterid=B830028K19 | -0.9088060 | -0.3135939	NOCODE4.0		chr7	79516881	79518761	+	GCCGCACGCCAGCTTAGGCAGTAGATGTGTATAAATCGAATTTAGCAAATCAGATCATGGTTTAAATGCACTATTTAAAGCAGTCCTGCAGGGAAGCCTTTTACAAAGGGAATAATCATTTTGTGATGCTAATCATCAGCCTCCAATTTATCTCCTTTGTAAGTTCAGATGTTGGTGCACTGGGTGTTCTGAAATTGGGGCGCTCTGGTGTAGGGCTTCAGTGATGGCTGTCTGCCTTCCTTTCCTGACCTCTCATTTTAAATGGGTGCATGTCCTGTTTCTCACTGGGGGCCTCAGGATGTGTGTCACTTAGCCTGATAGTTCTCATCCATCCCACTCATCTTTTCATAATCTCATAGAGGCCACCATTCAGCTGCTCCTGGCTCCTTTTCTAAGATT…
n276860:4552979	4.46523	2.61879	2.72072	1.7532	3.00851	4552979	438	NONMMUT032144	3046	| AK046738 | mRNAlike lncRNA | Mus musculus | Mouse noncoding transcript | FANTOM3 | B530033N09 | http://fantom3.gsc.riken.jp/db/annotate/main.cgi?masterid=B530033N09 | -1.0415000 | -0.3790611	NOCODE4.0		chr18	40539974	40543018	+	TTATGGACTCACATGAATGCATGTCTACATCTCATCAATTTCCAGCAGCTCAGAGATTCAACAGGAGTCTGCAGTCTGTGAATAGCAAACATACATAAACTGCTTTGACTGATAACTTAGTAACTGTTTTATCTTGCTTTGTAACATTGTAGATCTTAGCCTGCTGTATTTCTTTCTTATATATTTAATTTTTGAGAGAAACATAGTAAAAAAGGAAACTACTGAGGTCCCAGGAAAATTGCACAGCATTTTGGCAATCGTTGGTCTATTCAAAATGCTAATTACTACCATCCATCCTCACTGCCAATGGAAACAAACTATTTTCTTTGGAATCACTGAAGGATACAGAAAGAAATAATTTTTTATTGACTACTTTCATATTTTGTTTCATTCTTATAG…
n276993:4735554	3.63137	1.78849	1.99008	1.51174	2.51993	4735554	345	NONMMUT031587	2039	| AK140309 | mRNAlike lncRNA | Mus musculus | Mouse noncoding transcript | FANTOM3 | B330021C08 | http://fantom3.gsc.riken.jp/db/annotate/main.cgi?masterid=B330021C08 | 1.1408600 | -0.3519386	NOCODE4.0		chr18	16585387	16587423	-	GTAAACACTCTCGTGCAAGCCTCTGCATGTGGGAGTATTTTTCCAAATTAGAAGCTTGGAGATGGAATTACATGATTCAAGAAACCAGAGTGAAGTTAATTAAACATAGCTAAAATTATAAATGTTTGGTATTGCTTCAACGAGCCTTTTAGCTAAAAGAAGCAGCTTTGTAAAACCAGCTACAGAATGCAAGCTGGTCTAAGCAAGACCTTATTCTCTTTTCTGTGCAAAATACCCATAAAGTCAAGCCCTGGAATAGCTTCAGGTGTTCTGCAAAATGGCTTACATATGTAATTAATAAAGCCCACGAATCTACTCCCCCTTACTCGCAGCAGTTTGGATGTA
n277049:4782633	4.70073	2.75843	2.14553	2.38157	3.22698	4782633	173	NONMMUT051357	1684	| AK046431 | mRNAlike lncRNA | Mus musculus | Mouse noncoding transcript | FANTOM3 | B230384G18 | http://fantom3.gsc.riken.jp/db/annotate/main.cgi?masterid=B230384G18 | 0.3833480 | -0.3450710	NOCODE4.0		chr5	19459719	19461401	+	CTCACCAGGATGTTGAATGAAGCTAAATCTTGTGATCAAGGATATTGAATGAGTGGTGACTTTAGGGCAAAATTCCATCCAGCTAACCTTACGGATGTGCAGTTGCATAAAAGTGAACGGTGTCATGTTAGGCATTATTATTAGCTGGTTAGTATTCTCATGTGGGCACACGG
n277059:5301574	3.76463	2.64061	2.41583	1.68374	2.88604	5301574	236	NONMMUT026613	2755	| AK046404 | mRNAlike lncRNA | Mus musculus | Mouse noncoding transcript | FANTOM3 | B230380D12 | http://fantom3.gsc.riken.jp/db/annotate/main.cgi?masterid=B230380D12 | -1.0858600 | -0.4581054	NOCODE4.0		chr16	40354333	40357082	+	TCAGAAGGACTAATCAAATGGCTCCTTTAGTACAATAGGAAGTATCCATTTTGAACAAGAAAAAAATGAACAACAACAAACAAGTTGAGTGTGGCATCAAACCCATGACACTAGATAAGACCTGAGGCAGGGCAGAAAAAAAATACTCAAAGACATTATGGCAAATTTAGAAAAGTTAATAAAGCTAAAATATAAAACAAAGTTGATCTGAGCCCTACATAGCTACATCCAAAGAA
n277074:5101627	6.26541	5.66301	5.34033	4.1967	4.8539	5101627	224	NONMMUT041886	637	| AK046379 | mRNAlike lncRNA | Mus musculus | Mouse noncoding transcript | FANTOM3 | B230377L22 | http://fantom3.gsc.riken.jp/db/annotate/main.cgi?masterid=B230377L22 | 1.4815300 | -0.4594276	NOCODE4.0		chr2	181141305	181141940	-	CTGGGTAGTTGTTAGGTATCCAACACTAAGCATGATTTCCTTCTTATTGAATGTGTTTTAATTCCAATAATAGAGCTGTTGGCTACCACCGAGGTGTGCATCCTTAGTGGGTGCTGTTGGTCATTGTTGTGGTTCATACGCATCATAGCTGGATAGGACTGATGGTTGCTTCCTTCCTTTGGAAGCTTGCATGGCGCCTTCTAGATCCATGAAAGCTGCCGTTC
n277099:4398731	7.21771	5.9499	5.67161	3.38656	5.52549	4398731	309	NONMMUT061411	1349	| AK046343 | mRNAlike lncRNA | Mus musculus | Mouse noncoding transcript | FANTOM3 | B230373D06 | http://fantom3.gsc.riken.jp/db/annotate/main.cgi?masterid=B230373D06 | -1.1109200 | -0.3560492	NOCODE4.0		chr7	59258854	59260201	-	ACTGAAGCAGTACATCCTACCAATAAAGAAAAGCAAAGAATAGATTCATTGCTAAAATTACCAGTTCTTTATAGAAGAACAAACGGCAAAAAACCTCAAAGTGTTCTACCAAACAGGGAATGAAAACTACTAAAGCCATTCTACAAAAATATTATTTTGAGAGTTCCAAACCAGGTAAGAGCACTTAGAAAAGAACACACCTCAAACATACTAAAAGGCTATAAAATAACCTGAGACTATTGTTATGTTAAATAAAAAAAAATACTGAAGTCATTTTTCTCTAATATCAGACATGTGACAAGGGTGTTC
n277099:5388892	5.63971	4.10241	3.42656	1.97763	2.64688	5388892	114	NONMMUT061411	1349	| AK046343 | mRNAlike lncRNA | Mus musculus | Mouse noncoding transcript | FANTOM3 | B230373D06 | http://fantom3.gsc.riken.jp/db/annotate/main.cgi?masterid=B230373D06 | -1.1109200 | -0.3560492	NOCODE4.0		chr7	59258854	59260201	-	AGACCCTCTAAATCAACTACGAAAGTCTCATAGGAAATGTCATAAACTGAAGCAGTGGGTCTGTACCAGGTATGTATGTCTGTATGTATGTCTGTATGTATTTGTAAGTGTCTG
n277123:5530670	5.00083	4.09107	4.01784	2.82514	3.98442	5530670	649	NONMMUT061402	1145	| AK046311 | mRNAlike lncRNA | Mus musculus | Mouse noncoding transcript | FANTOM3 | B230368F23 | http://fantom3.gsc.riken.jp/db/annotate/main.cgi?masterid=B230368F23 | -1.1411900 | -0.3764065	NOCODE4.0		chr7	59236830	59237975	-	CGCATCACAGCATGGCACTCTTATGTCCAAATACACATTATACAACACATAATGATAATAATAGTAATAATAATTCAAAAGATTAAGACAAAATATAAAGGACTAAAGGACTAGAAGAAATGTTCCCTGGGTTTAATGCCAAGAACCCCCCCCAAAAAAAACTATTATTATAACATGATAATTTTAAGCGCAGAATAGGTGTCTAAATAATTAAGCTATTATCTCTTGACCACTAAAAAGACGAATTAGTATCAATTTTTAAAAGACCTTCAGAAGGTCTTTGTTAATTGTCCAGGCCACTATAGTACTGCTTAATTCTGTTTACCTTTAAATTCTCAAGCCTAGAGAATTATGTATTACCATACATACATATTTCAAGAGCCTACAGCAGATATCCTA…
n277132:4681079	1.72379	3.35741	3.56417	3.80995	2.45791	4681079	2377	NONMMUT057895	3307	| AK046305 | mRNAlike lncRNA | Mus musculus | Mouse noncoding transcript | FANTOM3 | B230367P07 | http://fantom3.gsc.riken.jp/db/annotate/main.cgi?masterid=B230367P07 | -0.8594880 | -0.2748820	NOCODE4.0		chr6	88802709	88806015	+	CATCGCTCTTAGCTCCTGGTGCAGATGTGGTGTGGCCAGCGGCTCCAGCTTCTTGTCTCCCTGCCTCCCTCACCATAAAGAACTGCTGGAACTGTGAGCCCCCCCCTAAGAGCCTTTCTTCCTTGTGTGTGTGTGTGTGTGTGTGCGCGTGCACGCGCGCGCATGCGTGCGCATATGTGTGTTATCATAGCAACAGGAAATGAAGCTAAGGCAAAAAACTTATAAACGAAGAACAGATGAATCACTCAGAAGTAGGCTGCAGATTTTAAGAGCTGGGAAGTCTGAACTCTGACAACGCCCTTGACCTCCAGACATGGCCTTGTGGCTCGAGCTTTTTTATCTTTCATCTACTTGGGTTGATATTCATCTGGGATTAAATCGACCATGTGAAGTTTGGCG…
n277192:4752694	5.82699	4.16396	3.72946	3.57582	4.38627	4752694	95	NONMMUT063537	663	| AK140221 | mRNAlike lncRNA | Mus musculus | Mouse noncoding transcript | FANTOM3 | B230352I09 | http://fantom3.gsc.riken.jp/db/annotate/main.cgi?masterid=B230352I09 | 4.3303200 | -0.2004710	NOCODE4.0		chr7	123031414	123066439	+	AGGTGATGTGATTTGCCTAAAGTCATGCAACTAGTGGCAGAGCCCAGCCTAGAAGCCAGGTGTCCTGGATCTCAAGATACTCCACTGCCTGAGGA
n277196:4629324	5.65304	3.00193	3.42467	2.53394	4.98987	4629324	482	NONMMUT061789	1783	| AK046202 | mRNAlike lncRNA | Mus musculus | Mouse noncoding transcript | FANTOM3 | B230352A17 | http://fantom3.gsc.riken.jp/db/annotate/main.cgi?masterid=B230352A17 | 2.3503300 | -0.3570598	NOCODE4.0		chr7	61936958	61938742	-	TCTGGGATGACCCTCCAATATCTCATACTAGCCCAGAAAAACCTACAGGAACTTGGGGCATGGGAACACCAGATGGGATTCCTCTTCTAGCAGCCTTGAGAATACCTGGCCATCCAGCAGCTTCAACAATTGGCACTCGGGCAATGCCAGTATCTTTAGGAGGAGGAGGTCCTTCTACTGTCGTGTAGACCAGGTTCTCCCCCATAAAGCAACACCAGAACAATGACTCACTTCTCTTCTATTTCTGCTTGTTTGGAGTTCTTTAGCTTAATCTTCCTGAACTCATCACAGACACAGAAGATAAATTCATATGCTTGTCAAATGCTTTGAAGGTCCAGTAAAGATCTAGCCATTTTGCAGGATGCCTCTCATCCTGTAGTTAATGTGCTGCACCATCTT…
n277219:5237126	6.96157	5.76241	4.06434	4.7023	5.81053	5237126	403	NONMMUT019841	1507	| AK046169 | mRNAlike lncRNA | Mus musculus | Mouse noncoding transcript | FANTOM3 | B230346I03 | http://fantom3.gsc.riken.jp/db/annotate/main.cgi?masterid=B230346I03 | 1.2498800 | -0.2597450	NOCODE4.0		chr14	20363282	20369184	+	TATTTGGGCACAGATCTGCTAGTTTTTCTTTTTGTATTTAAATTTCCTCTAGTCTATCAACAGTTTACCTCCTAGTACTTTAAAGATACTGTCTATGGCCTTCTGCTTTGCATTACTTCTAACAAGACACCTGATGTCATCTGTCCCTATATATCTGCCAAGACTTGGGTTGGAGGGCACACATCACCACACTCAGCCTTTGGTCACTTGCAATATTTTCTCCTTATTGCTAGTGTCAAGAAGTTTGATGATGTACTGTGATGTAGTTTTCTTTCTGTTTCTTCTGGGTGGAAGTGGCTGGATTTCCTGTTTCTGTACATCCAAGACGCTTTCATTGACATTTTCAGCTATTATTTCTTTATGTTTTTCCTTTTTCTAATCGTCTGTCATGACTTGGGG…
n277270:5204475	1.505	2.92341	2.97348	3.66734	2.89611	5204475	179	NONMMUT026923	2855	| AK046090 | mRNAlike lncRNA | Mus musculus | Mouse noncoding transcript | FANTOM3 | B230341E13 | http://fantom3.gsc.riken.jp/db/annotate/main.cgi?masterid=B230341E13 | -1.0367000 | -0.4742748	NOCODE4.0		chr16	52339622	52342459	-	GATGTGACTCTAGAAGGCATAGACAGCTTGCCCGGAAGTGCCCACATCCCAACAAGACCCACTCTTTCTTCCATGTTCTACCTCATTCTACATCCAAGCACTTACAAAATCGTCAGGGAAAACAGATTTTACCATGACAGTTTTAGAACTGCTGTAGTCTTAATAGGTTTCGGGCTCTG
n277289:4457481	1.93508	3.41135	3.35164	4.63987	2.54247	4457481	122	NONMMUT010815	3887	| AK046061 | mRNAlike lncRNA | Mus musculus | Mouse noncoding transcript | FANTOM3 | B230339C16 | http://fantom3.gsc.riken.jp/db/annotate/main.cgi?masterid=B230339C16 | 0.0620579 | -0.3230135	NOCODE4.0		chr11	77276759	77280644	+	GATTACTCAGATTTGTTGCAGCATGAGAGTTTGGAAGAATTGGAAGCAGGTCCAATCTCTACCTTATTACTTATTTTAATCAATTTTTAAGTCTTTGGCTTTTGCAGTAGAATTCCTAGAGG
n277300:4967935	3.87795	2.57953	2.49966	1.79197	3.42546	4967935	260	NONMMUT027143	710	| AK046041 | mRNAlike lncRNA | Mus musculus | Mouse noncoding transcript | FANTOM3 | B230337G03 | http://fantom3.gsc.riken.jp/db/annotate/main.cgi?masterid=B230337G03 | -1.5906100 | -0.3664168	NOCODE4.0		chr16	66708952	66709662	-	GTTGCAAGCAAAAATCCCACCCATGCTAGAGACAATAAAAATAAATGACATTAAAAAGAAAATATCTATCTTTTCTGAAATTTGTTTCACTCTAAATTGTTGTAGGACACACTGTTTCGATGCCTAGCTGCTGTTAATTAGATCAGCACAGGCGCTGGAGCTTTGGTTTTCCTTTTGAGTGTTGCCACCAGCTGCAAAACATCCATTTCCTCATAATTGATTCTCAAGTTTATTTGCAATGTTCCATGAGGCATAGCCTA
n277310:5413161	5.83527	4.50942	3.79617	2.87474	3.57861	5413161	222	NONMMUT061714	1963	| AK046019 | mRNAlike lncRNA | Mus musculus | Mouse noncoding transcript | FANTOM3 | B230334A10 | http://fantom3.gsc.riken.jp/db/annotate/main.cgi?masterid=B230334A10 | -1.1693700 | -0.3440357	NOCODE4.0		chr7	61010254	61012221	-	AAGAGGGACACAGATATGAAGGACCTGAATTGTATGTAGGGGAGGAAAGCAGAACCACGATGTAAAGGGGCCAGGAGAACATGGCCCAGAGGACTGCTCAATTAAGTCAAGAGCAGCCAAAACATAACAAAGAAATTCATATGTAGTAATTCAGAGATCTCTGAGGGAGGTAAAAAACAACATCATAGAGGTTAGGCAGTTGTTCAGCTATTGTGCTACTTA
n277310:5543195	5.18075	3.4921	2.83319	1.89357	2.95911	5543195	474	NONMMUT061714	1963	| AK046019 | mRNAlike lncRNA | Mus musculus | Mouse noncoding transcript | FANTOM3 | B230334A10 | http://fantom3.gsc.riken.jp/db/annotate/main.cgi?masterid=B230334A10 | -1.1693700 | -0.3440357	NOCODE4.0		chr7	61010254	61012221	-	TTTAGATGGAAGTGGCAACAATGTGTAACAGATGATTTTTTTTAAAAAGGCAGATATAAAGATGTAAAGATGCATTTATTATCTGTGTATATTCATTTTCCACTTATGTTTATGGAAATTTTTGTAACTATTATTTGAATTATTTTTTCATATCATGAAAGTGGCTAGAGATTTTCAAAGGATTTTATTTTCTTTTTCTGAACACTGAAATGATCATGTAAAACTTTGCCATTACTGTATTAATGTAGTACTTTACATGAGCGCTTTATATGTTATGCTATTCCTACATATTTAGGTCACATTTACAATATAATAGTATATACACTTTTCTATATGTTTGATGGTTTGAATTGTATTTGTTAGTATAGAACTTCATTTTGTATTATTGTTTGATGTTTT…
n277319:5370352	4.19643	3.6805	3.02191	2.07657	4.19483	5370352	54	NONMMUT011340	1185	| AK140188 | mRNAlike lncRNA | Mus musculus | Mouse noncoding transcript | FANTOM3 | B230333M21 | http://fantom3.gsc.riken.jp/db/annotate/main.cgi?masterid=B230333M21 | -0.2583070 | -0.3927345	NOCODE4.0		chr11	87242426	87243615	-	GACTATACAAAACTGTCAAGGGCTAAAGAGCAGTCAGGGATCAAGAGAGACAGC
n277335:5276457	5.70978	5.35391	4.23819	3.69066	4.42282	5276457	487	NONMMUT068540	1324	| AK163514 | mRNAlike lncRNA | Mus musculus | Mouse noncoding transcript | FANTOM3 | B230328M02 | http://fantom3.gsc.riken.jp/db/annotate/main.cgi?masterid=B230328M02 | -1.0179200 | -0.2151664	NOCODE4.0		chr9	34486125	34510605	+	TACCCAGAGCTATGTTTCCATGATGGTTCTACATCCTGTCAAGTGCTCAATCAAGATTAACCATTCTGCCCCTGCAGCACCTGATTCCTTGAAAATCTGCCACCCTCACTAAGCACCAGCCAGCCTCTCAGACACTTCCCTATTCTGGTGAGAATATCTTCAACTCCACTTTGTAGTTGAGGAACTGGAATCTCATTGGGGGTAATTTATTTACCCCACATATAAATAATAGGGGTGAGCCTTCTGTCTCCAGTGGAAATCTCCCCAGCCTTCTGAGCTCTTCTGAGTCAGCCCAGCAGCAGACAGACTCTTACCTTCCCCAGACTCTGAGTCAGGCTTCAGTGCTCCCAGAGAATGAATTTCCTGCAAATCAATCCTGGATGCAGTTATTATTTTATA…
n277380:4870676	4.67521	3.48228	3.44794	2.58738	4.35734	4870676	449	NONMMUT015949	2276	| AK045897 | mRNAlike lncRNA | Mus musculus | Mouse noncoding transcript | FANTOM3 | B230319I17 | http://fantom3.gsc.riken.jp/db/annotate/main.cgi?masterid=B230319I17 | -0.9762050 | -0.2445705	NOCODE4.0		chr12	111087765	111090041	+	ATCCTCAGGGGACTTGTGTTTCTCCTGAGCCATTTCATTTCCTTTAAGCTCCTGTAAGCTTTTGTTCTTATGAGAGCAGAGTTGATTTTCTTAGGCGGAAAGTTTATTTTCATGGAAGGGCTTTTAACCATGAGGGAGTTTTTAGCTAATGCATATCTCCCATTTCATCGCTTGTACCAAATGCTGTCCTGTGCAAAGTAGGGTGGGGGGTAGGTGTCCACCTCTCTCAGAAAATCAGAGAAGTGAGGACCAGGTAGTGTAGCAGAGAGGCCTACCAAAATTAGTATTTGTGTAACTAACTCCGAAGAACATTTCAAGAAAAGCAAGAAGAGTGGATGCCCGTGGCTGATGTTCCCAGTTAGGCGACCGAGCTCTGCTGGGGACAGTGGACACTCAGTG…
n277394:5039042	4.6095	2.87328	2.72942	1.71962	3.34369	5039042	350	NONMMUT005544	1000	| AK140157 | mRNAlike lncRNA | Mus musculus | Mouse noncoding transcript | FANTOM3 | B230316O19 | http://fantom3.gsc.riken.jp/db/annotate/main.cgi?masterid=B230316O19 | 1.1777800 | -0.2467581	NOCODE4.0		chr10	49363894	49364895	-	TTAAAGTGAACCAAAATCCTCTGCCACAAAATAATCAAAACACTAAAAGTACAAAACAAAGAAAAATATTAAAAGTCATAAGAGATACAGGACAAATAACATACAAAGGCAGATCTATTAGACTTGCACCAGACTTTTTAACAGAGATGTCAAAAGATAAAAATCTGTACAGATGTCTTATAGTGTCTAAAATACCACAGATGCCAACACAGACTCCTATACCCAGCAAAAATTTTAATCACCATAAATGGAGAAAACAAGGCATTCCATGAAGAAAAATTTAAACAGTATCTTTTGACTAATCCAAGCTTTGTAAAGTATATTAGAAGGGAAACTCCATCACTAGGATG
n277408:4490466	6.22148	5.64504	3.40612	3.43597	4.73359	4490466	229	NONMMUT021257	2884	| AK045864 | mRNAlike lncRNA | Mus musculus | Mouse noncoding transcript | FANTOM3 | B230315F23 | http://fantom3.gsc.riken.jp/db/annotate/main.cgi?masterid=B230315F23 | -0.5656820 | -0.2256875	NOCODE4.0		chr14	63824260	63827142	+	CCCTGGTGTATAGAAGGAGTCTAGAGGAGAATGAAGCTGGAGTGTATTTAAGATTCCAACACCCCTGCTGTGCTAAGTCTCAGGTCAGGTAGTCTGTGGATAGTCATCTTGCATCCATTTGCTCAGTAATTGGCAAATACTAAAATAACTCCACCAGATTTGGCTGGGAGCATGGCATACAGATTTAACATGTAAAGGGAAGAGAAGTCAGTGTAATTCCATGGATCCA
n277418:5215193	6.91086	4.34428	3.66469	2.79122	5.28018	5215193	275	NONMMUT026612	4032	| AK045852 | mRNAlike lncRNA | Mus musculus | Mouse noncoding transcript | FANTOM3 | B230315B10 | http://fantom3.gsc.riken.jp/db/annotate/main.cgi?masterid=B230315B10 | -1.1201200 | -0.3780421	NOCODE4.0		chr16	40323047	40327075	+	TGTAAGCACGAGGACATTGAGTTTGATTCCAAGAATAAAATTTAAAAAGAAAGTGCCCAAGTGTAGTGTTGCATACATATAATCCCACTGAGATGCAGCTCTCTGGGCTGATAGGAAAGCTGGTGTATCCTAGGTTGTTACATCTAAGCCTGGGAATCTTGTTTCAAAACTACAAACAAGTTGGGTAGAAACTGAAACAGTAGCTAAGGTTATCCATTGGCCTGTCCATGTATACATAAGCACATTCTTAGTTGTACACTCATGCTCAACATGCA
n277423:5264747	6.3137	4.4118	3.95304	3.24309	4.17679	5264747	501	NONMMUT021917	4834	| AK140146 | mRNAlike lncRNA | Mus musculus | Mouse noncoding transcript | FANTOM3 | B230314J23 | http://fantom3.gsc.riken.jp/db/annotate/main.cgi?masterid=B230314J23 | -1.5906100 | -0.4060091	NOCODE4.0		chr14	93695270	93700103	-	CTAGATTATTCTGTGCCTTCATTGCTTTTCCTTCTCCTACTACCTGCTTGCATAGTTATTTATGAAGCTCTAAAGTATAGGAGGCAACATTATAGCTAACTCAAAGCTTTTTATAAATTGTTCAAAATCGTCTCTCATTTATGCTTTGAACAGAAAGTTAGTCTGAAGCAGAAAGTATTTTTTCCTCTATTTTACTTTCAAAATGTCACAGTCAAACCATAGTGCATAATTATACAGCTAGGCAATCTACGTTCCCTGTATCAGTATGATGAGGAAAACGAATATACTACTGTAAGTTACTTCCTTAAATACTAAATAAACAAACACACTTTACGAATTATGTGTGTTATATTTTTTTATACACCTGCTGGTTTCCTTCTCTTTTAAAACCATAGAAAA…
n277439:5473625	7.05816	6.32954	4.64364	3.9622	5.32342	5473625	188	NONMMUT061434	2983	| AK045827 | mRNAlike lncRNA | Mus musculus | Mouse noncoding transcript | FANTOM3 | B230312N01 | http://fantom3.gsc.riken.jp/db/annotate/main.cgi?masterid=B230312N01 | 0.2372000 | -0.3704998	NOCODE4.0		chr7	59328209	59331189	-	TCTCGTCTCTCCACTTGTCAATATAATGCTTAAATTATTCACCTAGGTAATAAAGCAATGGAAATACAGGGTACATTAAGTGAAATAATTCAATCCATTCCTATTACAGACAATATGGACCTACACTCACTGGGCACTAAAATTCTCCTCAGACAGGAAAACCAACTGATCTGATAAATGCTCCTAGG
n277442:5395869	4.8582	3.00366	2.77963	2.82366	3.50624	5395869	268	NONMMUT040153	826	| AK140140 | mRNAlike lncRNA | Mus musculus | Mouse noncoding transcript | FANTOM3 | B230312H13 | http://fantom3.gsc.riken.jp/db/annotate/main.cgi?masterid=B230312H13 | -0.9506450 | -0.3972447	NOCODE4.0		chr2	140213307	140214131	+	TGGAAAGGGGACTCACAGGTTAAGAGCACTTGCTGGTCGTGTGGGAGTTTAGGTGTCAGCACCCACAGGGTAGCTAACAACCACCTGTAATCTCAGATCTAGGGCATCTGACATGCTCTTTTACCCCCATGGATACCAGGTATCCATACATGTACACGGAAGCAAGCACAAGCACACATGATAAATCTTAGAAAGAAAGAAAAAAGAGAGGAGAGAAAAGCCGAGCGAAACCAAGCTCAGATGCACTCACTGTGGTTAGAGTCTTCTA
n277474:5203163	6.22426	4.2386	4.83641	4.03583	5.02872	5203163	120	NONMMUT037344	2785	| AK045772 | mRNAlike lncRNA | Mus musculus | Mouse noncoding transcript | FANTOM3 | B230310I03 | http://fantom3.gsc.riken.jp/db/annotate/main.cgi?masterid=B230310I03 | -1.1343700 | -0.3307360	NOCODE4.0		chr2	55467777	55470559	+	AAGTACTCCTAGAACTTTGCCACCTGCCTACCTATTAAACTTCATGCTCTCACTCTTTCTATCTGAACACACACACACACATTAATAAAATCTCAGCAAACTGAAGCCAATGAGACAAAA
n277525:4743062	8.51372	6.92415	5.97098	4.12737	6.94724	4743062	178	NONMMUT009850	585	| AK045685 | mRNAlike lncRNA | Mus musculus | Mouse noncoding transcript | FANTOM3 | B230304A20 | http://fantom3.gsc.riken.jp/db/annotate/main.cgi?masterid=B230304A20 | -1.1950000 | -0.1911762	NOCODE4.0		chr11	55608072	55608657	-	TCTACGCCGCCAGTTTGTTAAATTAATGCAGTAAGAAAGTCTGAAGATCTGAGGGAGTCTGGCCAGAAGAAGATGGGCGAGCTTAGAAATTGGAGATGCCTGTGAAAGCTTGGGTTCTTGAGCCCTGCTGGGAAGCCATGGACCCCAGCAGCCCCTGAAAGTTGTGGTGGGCTCTCTT
n277525:5312989	9.09087	8.21837	7.32147	6.55924	7.81942	5312989	119	NONMMUT009850	585	| AK045685 | mRNAlike lncRNA | Mus musculus | Mouse noncoding transcript | FANTOM3 | B230304A20 | http://fantom3.gsc.riken.jp/db/annotate/main.cgi?masterid=B230304A20 | -1.1950000 | -0.1911762	NOCODE4.0		chr11	55608072	55608657	-	TGGGACACCTTTCTTGCAGCGATCCCAACTTATTCGTCGGGGACCAGAGAACACGGACTGCAAGGCGGCAGCAGACAGGAACGGAGGCAGGGGAACGAGATTCCGGGACTCGGTCGCGA
n277543:5134306	5.31527	3.42847	4.86221	3.04813	5.11071	5134306	100	NONMMUT033713	1691	| AK045662 | mRNAlike lncRNA | Mus musculus | Mouse noncoding transcript | FANTOM3 | B230219I01 | http://fantom3.gsc.riken.jp/db/annotate/main.cgi?masterid=B230219I01 | 1.1913300 | -0.1639093	NOCODE4.0		chr19	6530694	6532384	-	GCCTCACACCCAAATCGGTTCAATTGGCTTTGGCGGAGACTACGCGGGCCGGGCCCGCCCGCCAGCCGGCCAGCGCCTGCGCTTTAAGCGGGCTGCGGCT
n277554:4439243	4.9208	3.87164	3.97273	2.85435	3.4349	4439243	364	NONMMUT042291	4372	| AK045653 | mRNAlike lncRNA | Mus musculus | Mouse noncoding transcript | FANTOM3 | B230218L23 | http://fantom3.gsc.riken.jp/db/annotate/main.cgi?masterid=B230218L23 | -1.5906100 | -0.3805285	NOCODE4.0		chr3	25759491	25763865	-	ATGTGGGTGAACCAGTCTGCTAACCTACTTCTTTCCTGATAATTCTTTGCCATTCCTTATGCAAGCTCTGCTTTTGTCACCTATATAGTTGAATGTAAAATATATGTTCATATAGATAGGTATATCATATCACATGTCTATGTCACAGATTCTCTATCTACTGGCTCACATGGTGCTTTTTTTCCTTTTAGACATAGTGATTTTGAGTAAGGATAGAGGACATGGTGACAAAAATAATTGAAGAAGTGAAAAATAATGACTATTTAGAACATTTATTGAATGCTCATGCACCATTGGGTTTCCAAAGTTTTTCCAGTTTTACTAACCACAATATATAATTGAATTCATCATCCATCCCAGGGTT
n277555:4591507	4.83108	2.79841	2.33201	2.19662	3.94801	4591507	191	NONMMUT025300	2346	| AK045650 | mRNAlike lncRNA | Mus musculus | Mouse noncoding transcript | FANTOM3 | B230218J24 | http://fantom3.gsc.riken.jp/db/annotate/main.cgi?masterid=B230218J24 | 0.3964870 | -0.2446528	NOCODE4.0		chr16	4964568	4966914	+	CTTGCATATGGCCTGTGAAAAACGAAGCCCACATCTCACCAACAGGAGGTATGCTGCCAAGCCTGTTTTCAAATTGGCAGCAGAAAGCAGCACAGAACAAGGCCCTTTGTCGAGAACTGATCTTTCCAGACCTGCTCCTGGGCAGGATGTGCAAAGTATGACTGCCTTTTCCTCTAAAGTGCCCTGGTCTC
n277650:4373717	6.87412	5.11718	5.02682	4.29896	7.53231	4373717	392	NONMMUT052661	3430	| AK045528 | mRNAlike lncRNA | Mus musculus | Mouse noncoding transcript | FANTOM3 | B230208N19 | http://fantom3.gsc.riken.jp/db/annotate/main.cgi?masterid=B230208N19 | -1.1770600 | -0.3262867	NOCODE4.0		chr5	72137265	72140695	+	GAAGGGGTTTGATTACAATCTGCCAAGTTACATGAAAAGGAAACAGGATAATCTTTCTAGAAAAAAAAAGTCTATGAGATTATTCATGTCTAAAATTTTGGACAATATCTTGTCAAAGGGGTGATGTGCCACCATTTGTTTCTTAATGCATAATCATTTATCCTAGGGAGGGGTGAAAGGAGCGTGCAACCACTTGCTCAAGGTGGTTCAATCAGCAGTTTCCTGAATGAACAGAAGAGAAAAACACCCATATATCGGAAAGAAAACACAAAGGTCCATTTGTTAATGGAATGGAGAACACTGTGTAAACTTCCTTGTAAATTCTGTACATAGTTCACTGAACTGTCCCCTGTGGTATGGTGGTCCTCAACTTCTGGGTGGATGTTTGGAAA
n277660:5491993	4.86972	4.50825	4.05535	2.81306	3.92092	5491993	567	NONMMUT070964	2286	| AK045518 | mRNAlike lncRNA | Mus musculus | Mouse noncoding transcript | FANTOM3 | B230208F16 | http://fantom3.gsc.riken.jp/db/annotate/main.cgi?masterid=B230208F16 | -1.5906100 | -0.2680340	NOCODE4.0		chr9	108367944	108370227	+	TTTGAATTTCCTGGGACTGGCCTTACAGATGATTGTGACCACCATGTAGATGCTGGGAATCCAATCTAGATCCTCTAGAAGAACAGCCAGTTCTTGTAACTACAGAGCCATCTCTCCAATCCCTTTTCCCCTGTTCAGATTCTTGGTCACAGTAACCACCTGGCTAGCGGCTACCACCAGACAGTGCAGCTATCAACTGTGTCCATCAGTATGCCGCCCCAAAATGCCATTTGTAAGTCGTTTCCACTTGAGCAAGTCCAGGGTGCTGCCGTCCGATCTTAGTATCCTTTAGGATTTAGTGTATAAATGGTAATTGACTTGTAATTCTCACAGATTCAAGTGACCAAGAAGGTGAAAGAGTCCTCACTATTAACCGACCACTTAAGATTTTTTTTTCCG…
n277671:4651090	10.3818	9.62385	8.61336	7.37636	9.31238	4651090	1544	NONMMUT009847	2235	| AK140080 | mRNAlike lncRNA | Mus musculus | Mouse noncoding transcript | FANTOM3 | B230207H11 | http://fantom3.gsc.riken.jp/db/annotate/main.cgi?masterid=B230207H11 | -1.0607600 | -0.2520711	NOCODE4.0		chr11	55504988	55507221	-	TCAGCACGCCAGTTTAGCCAGAAGAGCATCAATGAAGGGGGAATGTTGGATGAAATAAATTGCACAGCATTTCAGACCCATCCAATCTCATGAACTCATGATTTCATCATCCAATGCTGGAGCTATGATAATAATATCACCACTAACAAGTTAAAATGAGACAAATGAGCTGGACTCCGAGGTGGCTCATCTCGCTTCCTTCTCCTACTGAACCCACATACAATGCCTACTACATGCTGACACGAATACTCACAACAACAAAGGGGTAAGGGTCATGCCCTCTTCTCTTTTAAGTAAACAGAGTTCTGCTTATAAAAGATTGGCACAGCAGAGACCTCAGTGCCCTCAAAGAAAAATTTGAATAACTGCACAGAATATTTGTCTTCAGTTGCCATAGGC…
n277704:4799360	5.4395	4.12275	3.1333	2.18468	3.0913	4799360	532	NONMMUT061609	2989	| AK045462 | mRNAlike lncRNA | Mus musculus | Mouse noncoding transcript | FANTOM3 | B230205D10 | http://fantom3.gsc.riken.jp/db/annotate/main.cgi?masterid=B230205D10 | -0.3279930 | -0.4500190	NOCODE4.0		chr7	59627687	59630676	-	AGGCATTTGTTACATCTCATGAGCACATATAATCTTTCTCATGGTAAATATTGATGATTGCTCTAACCAAACAAGAGAAAGATTTGTATGACAAGAACATTAAGTCTCTGAGGAAAGAAACAAAGAAGATCTCAGAAGATGAACAGATCTCCCATGATCATGGATTGGCAGAATTAATATTGTTAAAATGGCCATGTTAAAATACGTTTTCAATCCAAAAAAAATAGGAGAGGAACAATGAGAAAGAACGAAAGTAAATGAGAAGTAAACAGAGATGATATAATACATGTTTCATAAGATAAGCAGACTAAAGACTTCTGCATGTGAAATAGAAAAGTGCCATAGATCTGCATTTTAAGAAATGATTCTATGTATTTTGAATACTTTTAAATGAACATG…
n277704:4924036	4.00102	2.19107	2.21468	1.89357	2.50811	4924036	371	NONMMUT061609	2989	| AK045462 | mRNAlike lncRNA | Mus musculus | Mouse noncoding transcript | FANTOM3 | B230205D10 | http://fantom3.gsc.riken.jp/db/annotate/main.cgi?masterid=B230205D10 | -0.3279930 | -0.4500190	NOCODE4.0		chr7	59627687	59630676	-	TCCTGCATTGGGTGAAATGACTGCCTTTGATAAAGCACTGAAATGAACTTATGAAAAAAAAAAGTCTTCAGAGCTAGTTACTGAATGCATCAAGACTTAACTATATGAGCATCATTCATTTTCATTGTTGTGTTAATACTAAAAGTAGCAATTTAAGAGTTTTTTGTAATGTGTTTTTGTGTGCTTATGTGTGTGAATGTGCATGTGCGTGTGCGTGCGTGCGTGCGTGCGTGCGTGCGTGCGTGTGTGTGTGTTGTGGTTGTGCCACAACAAAGATTCAGAGGACAACTTATGGTGGACTTTCCCTTGTAATATTTGGAATCTGAAGATCAAACTTATGCCATGAGGCTTGGCAAAAGTGTCTCTACCTG
n277713:5550066	8.40715	7.78995	6.73184	6.34135	7.63943	5550066	1092	NONMMUT014604	2200	| AK045450 | mRNAlike lncRNA | Mus musculus | Mouse noncoding transcript | FANTOM3 | B230201O22 | http://fantom3.gsc.riken.jp/db/annotate/main.cgi?masterid=B230201O22 | -1.0981600 | -0.3510383	NOCODE4.0		chr12	72797479	72799678	+	GTTGTGTTGATCAGTCGCTCAGCTAAATGGTATTATTAGAATGCTCTGCAGTCGATGAACCTTGGCTCTGCCATATTGTCAAATGAGCATCTACCATTTAGGGTCAACTCAACACATCTCCTCCCTCTTGTCTCTGTATTCTGTTACTGACATGTGCTTTCTTCCTATCCAGTTAACCAGCAGGGTGGAGTATCAGAAAAACCCAGATTTTCAGTACTGCACAGCAGACTTTTGCTAACTTACCATTAAAAAATCTTATGTCCCTTAACAGGTGATTGTTAAAAAAAAAAAAAGAAAAAAAAAAAAAACCAATAAACTGGGCATTGGTGGTGAACACCTTTAAACCTAGCTCTTGGGAGGCAGAAGCAATCTGATCTCTGAGCTCAATCAAGGGCAGCC…
n277729:4920425	4.53854	2.60813	2.40931	2.33449	2.79424	4920425	608	NONMMUT051642	2596	| AK045426 | mRNAlike lncRNA | Mus musculus | Mouse noncoding transcript | FANTOM3 | B230117M02 | http://fantom3.gsc.riken.jp/db/annotate/main.cgi?masterid=B230117M02 | -1.2220400 | -0.2951127	NOCODE4.0		chr5	27218184	27220780	+	TGACACGTGCCTTCGATCCTACACACACTCAGGAGGCAGAGGCAGGTGGATCTCTGAGCTTGAGGACAGCCTGGTCTACAGAGTGAGCTCCCATACAGCTGTGTGTGTGTGCACGCACACATGAACAATACAATATTGCTGTAAAAGGATCAGACAGATCCCTAATTGTGCCTGAGACCTGAGAACTGACACATGGAAGATATATTCTGCTGTAGAGTCTAGTGTGGGATGATTAAAGTCTGATGACCAGAAGAGAAATCACTTCTCAGTGAATTATGAGACTCAATTTATGGAATAAATTATCGGGCTGGGTTTTTAGAAACTCCAACAGTGGTTATAATTTATCTTGATTATAGAAAGGTTTCATGAAATACACTATGCAAATTATTGATCCATTCC…
n277753:4819482	5.04531	3.21494	2.45364	2.57092	3.08899	4819482	388	NONMMUT048013	2472	| AK045393 | mRNAlike lncRNA | Mus musculus | Mouse noncoding transcript | FANTOM3 | B230112K06 | http://fantom3.gsc.riken.jp/db/annotate/main.cgi?masterid=B230112K06 | 0.0436799 | -0.3732496	NOCODE4.0		chr4	88109421	88111892	+	TAGACTGGCCCATTTTCGATATTTCTTTGCGTAAGCATAGGTAGAAACAGCGAGTAAAATCTTCCATCGTTAATTTTTCTCTGTTTTTGATGCTCACACTTTACAAATCCTTTAACTGTAGATTTCAATACTTGAAGTGATTTAGGTATCAGAACATTATTCTTTCTCATTCATTTCTTATTCACCCATCTCTCTTCTCTGAGACAGGGTCTCAGTGTGTTGTGTTGTCTGTCTAGCCTGGAACTCACTAAGTGCACCAGGATACCCTAAAACTCAGAGAGATTCATCTGCCTCTGCCTTCTGAGTGCTGTGATTCCCTGGGTGTGACATCAGGTTTGACGTTTTTTTTTTTTTGTTTGCTTGTCTTTGAGACTATAACCCATGCTGC
n277795:4476298	4.75818	3.77567	2.1537	2.37297	3.24609	4476298	307	NONMMUT012808	1607	| AK140030 | mRNAlike lncRNA | Mus musculus | Mouse noncoding transcript | FANTOM3 | B230104J03 | http://fantom3.gsc.riken.jp/db/annotate/main.cgi?masterid=B230104J03 | -0.9122500 | -0.2046016	NOCODE4.0		chr11	116235665	116235719	+	GGGTGTGAATCAGGCTGCAGCTTTCAGAGTTCCTACTGTGTGCCTGAGCTCTGGGGGTGTGAATCAGGCAGACCTGAACACAACACCCTGCAGGAGTCACACTCCCTCCGGGCCGCAGGGAAGTGTGAGTGCCAGTGAAGAGAATTGTCTGACTAAGTCTGTGGCCGCGATGGGTCTGGTCCTTCTTACGAGTACTCAGTACATAGCCAAGGTTGGCCTGGCTCGGTCATCCTGCCTCCTCCTCCTCCTCTTCTTCCTCCTTCTGAGGTATTGAGTCCATAGGCATATGCTACCACATTTGGGTTTA
n277818:5500028	9.39216	7.80853	7.88311	7.11056	9.16264	5500028	331	NONMMUT034197	1904	| AK139989 | mRNAlike lncRNA | Mus musculus | Mouse noncoding transcript | FANTOM3 | B230033K13 | http://fantom3.gsc.riken.jp/db/annotate/main.cgi?masterid=B230033K13 | -1.5906100 | -0.3105552	NOCODE4.0		chr19	22990478	22992458	+	CTGATAACTGCGCTAGAGACACTTACTTCCTAACTGGTGATCTCCCTCCCAGCAGACATGCTCTGAACCTGGAAATAAATCATGTGTCTCTAAGCTTCCTAGAGCCATGAGTCCCTGTGAGAACCCGATAGAAACGCTGAACCCTCCCATACCTCAAACTCACATCCACATGAAGCCTCACGATAGCGTTGAGGGGTTCGTGACTGGTGATGATTAAAGAGACTACACTCATTCTTCATCAATCACACTGCAACAGGCACTATACACTTCCAGACCATTTTCCTGTGATTCTCAGGAGGGCTGAGTCTCAGCACCAGAGTTTGAACCAAGG
n277833:5389495	1.80893	3.22177	3.48973	4.35736	3.22407	5389495	211	NONMMUT043551	1141	| AK139973 | mRNAlike lncRNA | Mus musculus | Mouse noncoding transcript | FANTOM3 | B230018N14 | http://fantom3.gsc.riken.jp/db/annotate/main.cgi?masterid=B230018N14 | -1.5906100 | -0.4132164	NOCODE4.0		chr3	79498117	79499257	-	GTTCTCTCAAGACCCTAAAAGGCTGCAGCTGGTCCTTCACTTTAGTCTACTGAGTGGACTAAAGTGGAGTGGTGAGATTGTGGAGTCAGAGACAAGTCTAGCTCTGCCCTCATCACACACGTGCTGGAGCATATTAACTGGGTCCCTGCAGCTTCTTCTTAAGCATTAGGATGGTAACGGGTTCAGCCTTTGCGTTAGGAGAATACAACTA
n277848:5144490	2.4136	3.24519	4.20614	5.00595	2.47235	5144490	180	NONMMUT020559	4075	| AK045327 | mRNAlike lncRNA | Mus musculus | Mouse noncoding transcript | FANTOM3 | B130065L01 | http://fantom3.gsc.riken.jp/db/annotate/main.cgi?masterid=B130065L01 | -1.3068200 | -0.3263068	NOCODE4.0		chr14	45276901	45280976	-	CTCTTGATTATCCTGCCTGTGGCTCCTGTTCCTAGAATGACACGCTGTGTTTAACGCTGTGTTTAAGTGCTTTGCCCACTTGCTAAATGGCAGCTGGAAGATTTTGTTTTACCGAAGTCACCTTATTCCTGTGGTAATACATAAGTGAACAAACTGGCCAAAGTTCTGAGCCATAGTTGA
n277879:4405829	5.95912	3.29181	3.76338	3.50945	4.9215	4405829	597	NONMMUT022421	3383	| AK045265 | mRNAlike lncRNA | Mus musculus | Mouse noncoding transcript | FANTOM3 | B130053A22 | http://fantom3.gsc.riken.jp/db/annotate/main.cgi?masterid=B130053A22 | -0.0791428 | -0.2842549	NOCODE4.0		chr14	118915506	118918889	-	GAGCCCTGTGGCACCCAAGACAAGCACCAGAGCTGGCTGACTGCAAGATGACAGAAGTCACATGACTGCCAGCATTTTAGGTTTTCTCCACCTCTCTCAATTCCAGAGGCTTTGGGTTCTCTGCAGAGAGATTGAGCAGACCATGCAATCAAGGACACCTTCAGACATCCCAGGCCCATTTCCTTCTCTTTGTCTTCATCCCTCTGCTTCAAGAAATCACAGAAATTATGTAGTAAAAATGAAACATTTAAGGACGTCTGCTTCCTGCAGGCCCTTTTCCCATTGGAACCTGAGTGTGACGTGTTTTATGCAGTCAGAATGTATAAAGTGGTCACAATGACAGTGTATATTGTCCTTTTTTTCTCAGCATTTTATTGTATAAATTTTACAATATACAGA…
n277889:4763464	4.79752	3.46428	3.33055	2.73684	4.11887	4763464	55	NONMMUT033904	1210	| AK045245 | mRNAlike lncRNA | Mus musculus | Mouse noncoding transcript | FANTOM3 | B130050P08 | http://fantom3.gsc.riken.jp/db/annotate/main.cgi?masterid=B130050P08 | -1.1548700 | -0.3566444	NOCODE4.0		chr19	10575905	10577113	-	GCTATTGCTTTTGCTATGAGTCTTTTGCCGAGGCCTTTCGGTCTGTGAGCGGATT
n277936:5254693	1.71295	3.14979	2.8239	3.82863	2.09153	5254693	381	NONMMUT074698	2008	| AK045157 | mRNAlike lncRNA | Mus musculus | Mouse noncoding transcript | FANTOM3 | B130041K22 | http://fantom3.gsc.riken.jp/db/annotate/main.cgi?masterid=B130041K22 | -0.9990440 | -0.3774412	NOCODE4.0		chrX	169058648	169060656	+	CAGCCAGTTTGGAAAATAGTCTCTCAGTTCCACAATAACTTAAGCATAGAGTGACTATATGGGATTGTGTATGTCCTAGGGACATGTACAAGAGAAATATGTGTATGAATATAAATACATTACTGATAGCAGTAAAAAAGAAAACAGCTTAAGTCTCCATCAACCTATGAATAGAAAAAGTATAGTTTAATCCCAAAAGAGAACATTATTCATCAATAAGAGAGTTGAAGTACTAATATATTCTATGACATAGATTAGCCTTGAAAATACTATGCTAAGTGAAAGAAGTCCATTATGAAAAGTCACATGATATAAAATTCTGTTTTGAGAATACGTCCATAGCAAACAAACTGATACAAGGTGCTTAGAGTTTCTTTTCAA
n277990:5439628	4.89461	3.54728	3.23933	2.12134	3.86618	5439628	67	NONMMUT042185	2647	| AK045039 | mRNAlike lncRNA | Mus musculus | Mouse noncoding transcript | FANTOM3 | B130021B20 | http://fantom3.gsc.riken.jp/db/annotate/main.cgi?masterid=B130021B20 | -1.1161300 | -0.4652517	NOCODE4.0		chr3	17560366	17563013	-	TCTGTTGGCCAGAGTAGGTCACATGCTTCAGTCTCCAGTTGTGAAGGACACAAAGCAACAATCTTTC
n278035:5224679	2.76331	3.73784	3.88489	5.03472	3.04504	5224679	320	NONMMUT072433	1613	| AK044950 | mRNAlike lncRNA | Mus musculus | Mouse noncoding transcript | FANTOM3 | B130015G18 | http://fantom3.gsc.riken.jp/db/annotate/main.cgi?masterid=B130015G18 | -0.8896690 | -0.3609895	NOCODE4.0		chrX	52318750	52320363	-	TTCACAGGTTCCAGACCATGGTCTGTTGCTTTTGTGCCGTGGAGAAGCAGAACAACATGGCAATGAGTACATTGAAGAGGGGCTGCCTCCCCCACTTCATGGAAGCCAAGAAGGAGGTTAAGCGCAAGCTTAGAACCCAATGTCTTCTTTAAAGGCACAAGCCCAGTGACTTAACTTCTTTCCACTAGATGCCACCTCCTTCCTTATACTTTTGTCCTCTCCCAATAAGGCCGTTTTTTCTGGAGACTAAACCTTTACTATATGAACATGGGGTGGGGGAGTATTTAAGATTCAAACTCTGCCAATAGTGTGATACATGA
n278081:4875441	1.76916	2.92296	3.86656	4.21175	2.58472	4875441	564	NONMMUT068903	3740	| AK044864 | mRNAlike lncRNA | Mus musculus | Mouse noncoding transcript | FANTOM3 | B130008O15 | http://fantom3.gsc.riken.jp/db/annotate/main.cgi?masterid=B130008O15 | -0.1904880 | -0.3345353	NOCODE4.0		chr9	45051423	45055161	-	GGACCTAACCCTAATCTGAGTCTTACGACTGAAGTCCAGGTTGTCCTTAGTTCTTCTGCCCCAGTCTTGCAGATCTTGGATTTACAGGCTTTTGCCATCCTACCTGACTTAGTTTGGGAACTTTAGAAACAAGGATATTTGTTTTTCTACTCTTGATTCTTCTCATAGAAAAAACTACCGGCTTCCAAGTCTAGTAAAGTATGCCAATGGAAAATGTCAGCTATGAAATATTTCCAAAAGCTGAGGCTTTTTATTCCCTTTTACTTTCATTAACCATGGCGGGTCCAGGAGAATTGAGTGATTACACCAGTAAAGCGGGGTCCTTTCCACCCTTTCTTTCAGAGCATGTTAGACTGTCTCATTCCACGTCAAGTACCGTGATAATGATATCCTTACTTT…
n278102:5171978	2.16056	4.70527	5.07147	4.88294	2.9404	5171978	1672	NONMMUT003645	1990	| AK044830 | mRNAlike lncRNA | Mus musculus | Mouse noncoding transcript | FANTOM3 | B130006M20 | http://fantom3.gsc.riken.jp/db/annotate/main.cgi?masterid=B130006M20 | -1.1123100 | -0.3977803	NOCODE4.0		chr1	165929805	166002629	-	CCTAGGTCTGGATTATGGATCTTCATTTACTGTGTCATATGTGCCAGAAGCTGTCAGATTCTTGGTTATAGGTATAATCAGAATAGTAGATGTGGTCTACCCTGCATTTGATATAAATTATGCTAAAGTTTTGATTGTGTCAGAAGTTATAAACTTGTCTAGTATATCCTTTCATTTTATTTTAATAAAATGTATACTTAACCCAAACCTTTTAACAAGAGAAAAACTAAGTACCATATAAATTTAAAAAATGAAACTCTTTGAGAGAAAGGTAAATCTATAAATATATATTCAGCCCATCCTTGTAAGTCAGTCAGCTCATAGGACATTTGACAGTCTAACTATCATCTGACAGATACGATACAAAATTTCCTCAGTTTCTGCTAGAGGCAAAAATCA…
n278408:5482571	5.63844	3.79416	3.29007	2.19086	3.9992	5482571	315	NONMMUT045895	1675	| AK044676 | mRNAlike lncRNA | Mus musculus | Mouse noncoding transcript | FANTOM3 | A930031L16 | http://fantom3.gsc.riken.jp/db/annotate/main.cgi?masterid=A930031L16 | -1.2940100 | -0.4334140	NOCODE4.0		chr3	156737539	156739213	+	GTCCATGAATGCCAATACCCGTGTTCACATATAACATTAGTCTGCTTGTAACTTCACAGTGGCATAAACTTAATAAAAATATCATATGATTTAGTGCTCCCAACTCAATATTTAGCTGTCAATGTTAGAGCCTGTATATTTGATTACTTACAATAAAGTTTTTCTTTTTTATCACATCCCAGACTCCCACCATATAGAACAATAAAATCAAAACACAGGAAATTGAAGTGTTAAGACATAAATTATATTTGAGTAGGTCACTACGGATAGCTAATATTGACAGAGCTTAGAATGAGCGTCCTCTGACCCTTTGGG
n278414:4877797	4.41104	4.03613	4.03613	2.03809	4.70087	4877797	493	NONMMUT059979	3006	| AK044666 | mRNAlike lncRNA | Mus musculus | Mouse noncoding transcript | FANTOM3 | A930031C22 | http://fantom3.gsc.riken.jp/db/annotate/main.cgi?masterid=A930031C22 | 1.4548600 | -0.1745243	NOCODE4.0		chr7	12977892	12981206	+	AGGCCACCATAGGACCCTGTCTTGCCACCAAACTACCTCTCTTCAGACCTTTCCAGCTGGTACCAAGCACCTAAGCTTTTTTTCTCCATCACTTTTGCGTACTCACCTCGTCACAGTCCTAAAATTCCTCCTCCTCTTCCTCCTCCTTTTTTCTTTTTTCTTTTTCTTTTTTGGTGTGTGTATGGGAGGGCAGTTCAAGACAAGGTTTCTTTGAATAACAAGCCCCAGCTGTCCCGGACTGGCTTTGTAGACCAAGGAACTCCTGAGTGCTGGGATTAAAGGTATGTTCTACCATGCCCAGCTTCATTATTCTTTTTTCATCTTAGTCTTCCAACCCACCGCACCTTGTTTTTGTTTTTGTTTTTGTTTTGTTTTATCTCTCTACTCAGCCCCAAATGT…
n278445:4667511	4.40611	3.56089	3.42355	2.35456	3.6946	4667511	184	NONMMUT041963	2746	| AK149330 | mRNAlike lncRNA | Mus musculus | Mouse noncoding transcript | FANTOM3 | A930027J23 | http://fantom3.gsc.riken.jp/db/annotate/main.cgi?masterid=A930027J23 | -1.2173800 | -0.3934659	NOCODE4.0		chr2	181872762	181875509	+	GTCCCATTAATGTCATAGGCTCATGGATTTATGTCAGCATTCTACAGTATCTGTCTGCATAAAAATATGTTTTAGTGATAAAATGTATGTCATTATCAATTAAGTATTTACAACTGAGTCATGTTTTGGCTGTAAAGTAGGCAACAGAATTAAGAACTAAGAATCCTTATGTAGCCATGTGATG
n278449:4455636	5.20082	3.6019	2.80047	2.70865	5.314	4455636	947	NONMMUT015450	2103	| AK044617 | mRNAlike lncRNA | Mus musculus | Mouse noncoding transcript | FANTOM3 | A930027I11 | http://fantom3.gsc.riken.jp/db/annotate/main.cgi?masterid=A930027I11 | -1.1190900 | -0.2983601	NOCODE4.0		chr12	102270390	102272491	+	GAGACGGGTTCACTCTGTTCCTTGAGGGAAGTGTTCTGTGGGTGGGTTCTGGCTGCGGGTGTCCAGCCTCACCTTGAGCTGTGTGAGTTGCAGACCCTGGGACTGTGCTCTGCCTTTTTCCACCTGACCTACACCAGGTTTACTTGGGGCCCTCGGCAGATAGAACTGCGGCTGAGTCACTGTGGCTGACTTGGGAATCTCCAGACTGTAGAGGGTTGGCTGCTAGTGTGTGAGGCTGGATATGCCCTTCAGAGCACTCAGTCCTGGCAGGGTATCCTCCCCCGTGTCTCCAAAGTCCTTCTTGATTTCTGACACAAAGGCAGCTTTGATTACACAGAGGCAGAAGAGACAGAAGGTCAGCCAGCTGCACCAGATCCAGGGGCAAGGTAGGGCTGCCAA…
n278456:5086425	2.66622	5.27172	4.50161	5.08088	2.68109	5086425	238	NONMMUT031748	2440	| AK080734 | mRNAlike lncRNA | Mus musculus | Mouse noncoding transcript | FANTOM3 | A930026N12 | http://fantom3.gsc.riken.jp/db/annotate/main.cgi?masterid=A930026N12 | -0.9993920 | -0.3674438	NOCODE4.0		chr18	25996704	25999133	-	TGGAGACCACGGAAGCTCAAACTTAACCACTAAGTTAACTTCTAACTCTAGCCACTGTGTGGACAGCAGAAAGCCAGAAACCACTTGTTTTCCTTAAAGAATAAAATTCCATCAGCTGCCTAAATGAACATGATGCATTCAACTCACAGTACAGAGGATCTGTGACGTTTCAGACACTATCCTGCATGGGCTCAGTGACTCCTTATAGCAAAACTGCAGGGCAAGAATGATTCCAATT
n278463:4352128	1.75826	2.53122	2.98689	4.14267	1.97105	4352128	427	NONMMUT057428	1056	| AK020890 | mRNAlike lncRNA | Mus musculus | Mouse noncoding transcript | FANTOM3 | A930026B05 | http://fantom3.gsc.riken.jp/db/annotate/main.cgi?masterid=A930026B05 | -1.0538100 | -0.2436425	NOCODE4.0		chr6	72375929	72376985	-	CTGTCAGATGTCCACAGACCTGGAATTATGGTTTGTTGTTGGCCACCATGTAGGTTCTGGGAATCAAATCCAGGTCTTCTGCAGGAACAGTCATCTCTTCAGCCCTAAAATTTATCTTTAAAAAAAATATTTATGGGTGCTGGAGAGTTGTCTCAACAGTTAGGAGCACTGGTTGCTCTTCCAGAGGGCCTTGGTTTCTTTCCCAGCACCCACATCCGTAACTGCAGTTCAGGGGATCTGACTGTGCTCTGGCTCTTCAGTCACCTACCATGTGGACCACCCATAGTGACTACTGAAGGCTGGATGCAGGTCCTCTGGAGGAGCAGCAGTTGCCTTTAACTAATAAGCCATTCTGCAGCCCATGCTTTTTTTTTTTTTTCTTCTTGAGACAGGTCTAAG…
n278616:5552363	3.51399	1.79532	2.4091	1.50185	2.29231	5552363	78	NONMMUT056255	2198	| AK044305 | mRNAlike lncRNA | Mus musculus | Mouse noncoding transcript | FANTOM3 | A930006I03 | http://fantom3.gsc.riken.jp/db/annotate/main.cgi?masterid=A930006I03 | -1.1791000 | -0.3364511	NOCODE4.0		chr6	32933864	32936061	-	CCATGATGAAATGGCCAAGGAGAAAAATCTCACAGCCTTGGGGAAAACATTAATCCAACCTCAGAATCCAATTGCTCA
n278689:4378588	4.36059	3.41932	2.82248	2.26319	3.4127	4378588	499	NONMMUT022874	2035	| AK044187 | mRNAlike lncRNA | Mus musculus | Mouse noncoding transcript | FANTOM3 | A830098B18 | http://fantom3.gsc.riken.jp/db/annotate/main.cgi?masterid=A830098B18 | -1.5906100 | -0.3858251	NOCODE4.0		chr15	22958362	22960396	+	CAGGAGGACAGACCAACTAGGGGTCTGCCACAGCAGCATAATCTGGACCCCCGAGATCTTTCAAACACTTGTCCACCAACTGGACAGCATACACCAGCTGATATGAGGCCCCCAACACACATATGGTAGAGGACTTCCGGGTCTGTGTTCATTCAGAGATGATGCACCTAACCCTTAAGAGACTGGAGATTCCAGGGAGTTTAGAGGTCAGTGGAGTGGGGGATGGGAGCATCCACTTGGAGACAGGATGGGGTGGGAAGGAGGTGTGGGATGTGGAGCAGTCAGAGGGTGGATCAGGGGGGCAGGAAATGGAATGTAAAAAAAATGAATAACAAATAAAGTTAAATTTAAAAAATAGTATTCATAAACAATATAAGTTAATATGGAAATTGGCTTATA…
n278689:4813497	2.22809	3.12941	3.55891	4.51926	1.78132	4813497	250	NONMMUT022874	2035	| AK044187 | mRNAlike lncRNA | Mus musculus | Mouse noncoding transcript | FANTOM3 | A830098B18 | http://fantom3.gsc.riken.jp/db/annotate/main.cgi?masterid=A830098B18 | -1.5906100 | -0.3858251	NOCODE4.0		chr15	22958362	22960396	+	TAATGCGGAAAGATAGCTAACACTGACATCCTTTTTGCAAAGTCATATAGAAGTTTAATACTGTAGAAAGTTCCTAAAATATATAAATATGAGAAAGGAAATTAAGTGGAATAACCATATAAGAGGGAAACAATTCCTCATCTGGTTTGCATTTTTTTTAAGTTGTTTGCTAAAATGGTCAGATGTCCTCTCCCTACCTGAAACATTGCCAGGGCTATTGGTTACTCTTCATGATCTAATGGCAAGGCCC
n278699:5146837	3.57333	4.36309	4.06856	5.85232	5.12565	5146837	505	NONMMUT039831	1520	| AK080685 | mRNAlike lncRNA | Mus musculus | Mouse noncoding transcript | FANTOM3 | A830097D01 | http://fantom3.gsc.riken.jp/db/annotate/main.cgi?masterid=A830097D01 | -1.1212700 | -0.2669124	NOCODE4.0		chr2	129604613	129606133	+	CAGTGATAATGAGCCGAACCGTCTAGGAGAAGTTCATTCAAAAAGTAGACATGTATGGAACATGCATGTTACGTGTATAGTTTTCTTTAAACAGAAGGAGATACTGTGTGTATTCTTTTGGACTTGTGGCACCAGAACTTGGTCTCACATCTGCTGGGCAGTACTCTTTCAGAGTTAGGCCCTCCCACATCACCCAACCTAGAAAACCTGAAATTTATCCAAGGTAGAAATTAAAAAAGAAAAGGCAGCTTTACCAGTTGTTAGATCCGTAGTCTAAGACAGTGGTACACTTAACAGTTACCCTTCACAGAGCCACAGTCACACAGAAAATACTGGCTTCTTAGACTCTCATTTCACACAGGAGCAACAAATAGGCAGTACAAACCGGAAGGGAACCCC…
n278714:4565573	4.06703	2.67204	3.32939	1.8133	2.88935	4565573	360	NONMMUT047244	1883	| AK044147 | mRNAlike lncRNA | Mus musculus | Mouse noncoding transcript | FANTOM3 | A830095B13 | http://fantom3.gsc.riken.jp/db/annotate/main.cgi?masterid=A830095B13 | -1.1084000 | -0.3422982	NOCODE4.0		chr4	49744259	49746141	-	TCTAGGTTAGTTGAGAATTCTGGTCTTCCTATGGGGTCACCCTCCTCAGCTTCTTCCAACTTCCCTAATTCAACAGCAAGGGTCCATAGGTTGGGTGCAAGTATTTTCACCTGACTCTTTCAGCTGCTTGTTGGGCTACTCAGAGGCCTGCCATGCTAGGCTCCTATCTGCCTACCATAGCATCAGTAACAGTGTCAGGGCCTCAGGCCTCCCCTTGAGCTGGATCCCAAGTTGGACCTGTCACTGGACCTCCTTTCTTTTATGCTCTTCTCCATTTTTGTTCCTGCAGTTTCTTCAAACAGGAACAATTCCGGGTCAGAGCTTTTGACTGTGGGATGGCAAAAGCTCCCTTGAGTCCTG
n278831:5352453	6.54341	6.35543	5.35801	4.11443	5.66923	5352453	105	NONMMUT020404	1571	| AK043945 | mRNAlike lncRNA | Mus musculus | Mouse noncoding transcript | FANTOM3 | A830055N07 | http://fantom3.gsc.riken.jp/db/annotate/main.cgi?masterid=A830055N07 | -1.1465400 | -0.3517194	NOCODE4.0		chr14	38851334	38852905	-	CTGATCAGTGGATGCTCCCAATACCCCAACATAAGCCTAAAATTATTCTGTCTTCTCACTGCAATGGATTGCCCAGGTCAGCCCAGTTCTAGGATGAAGCGATCA
n278835:4852123	6.49132	5.92392	4.88798	3.38001	5.50411	4852123	64	NONMMUT002429	1444	| AK043935 | mRNAlike lncRNA | Mus musculus | Mouse noncoding transcript | FANTOM3 | A830054G08 | http://fantom3.gsc.riken.jp/db/annotate/main.cgi?masterid=A830054G08 | -1.0319500 | -0.3371704	NOCODE4.0		chr1	124505756	124846039	-	GGTCCTGAAATATGAACCAAACAGCCAGCGTGTCCCATCACATCAAGTGTCAGCCCTCCAAGAC
n278881:4762961	5.37411	3.7219	4.29303	3.09376	3.57019	4762961	534	NONMMUT042535	2833	| AK043872 | mRNAlike lncRNA | Mus musculus | Mouse noncoding transcript | FANTOM3 | A830044L07 | http://fantom3.gsc.riken.jp/db/annotate/main.cgi?masterid=A830044L07 | -1.1738900 | -0.2998524	NOCODE4.0		chr3	34643263	34646096	+	GAGCCCACGGTGCTTGTCAATAAGCTGTGAATTAGGTGTAGAGACTGTCACCATAGATCATAACAGTTTCTGAAGGACTCATTACAGCATAGCGTGTCAGTGATCTCCAAATTAAGGGAGGGGGGGTGAGAGAGGAAGAAGGAGTGGGGGCCGCCAACAAAAATCCAAGAAGGGTGGGAGGAGAGATAAAAGTCAGAGCCCCAGCTAAGAAGAAGGCTTTAAAGATTATCAGGCCAGCGATCTAAGAATTCTGTAAGGATGGGTTTGGAAGCCCAATTCTGAGCCTGGGCTGGGAGGGATGCTGAGGCCAAGCAGAAGTGGGCCTCAGGGAAAGCTGACGTTCTCAGACATTGCCTTTGAGGTTAGAAGAGCTTTTGGAAGCGACCTCCTGATGTCAGC…
n278920:4802886	5.36401	4.06269	3.50109	2.76013	4.57964	4802886	63	NONMMUT015920	1358	| AK043820 | mRNAlike lncRNA | Mus musculus | Mouse noncoding transcript | FANTOM3 | A830036O05 | http://fantom3.gsc.riken.jp/db/annotate/main.cgi?masterid=A830036O05 | -0.1113970 | -0.2930551	NOCODE4.0		chr12	110607379	110608736	+	GGATGGACCAGGCTTCGCCCCTTTCCTCCTGCCCGGTCAGCACACTTGAAGAGATGCCCTCAG
n278927:5117431	4.26717	2.36334	2.32538	2.03795	2.44257	5117431	281	NONMMUT002427	3669	| AK043815 | mRNAlike lncRNA | Mus musculus | Mouse noncoding transcript | FANTOM3 | A830036A12 | http://fantom3.gsc.riken.jp/db/annotate/main.cgi?masterid=A830036A12 | -1.5906100 | -0.4079353	NOCODE4.0		chr1	124375577	124379242	-	TCTGGCTAAGGAGGCCAGCACCTTTCTCCCCACTGATGCTCCAAATCCCCATAATGAGGACCCAGTCTCAGAGGAAAGAGAACAAATGTCAAAGTGACAGGGCAAGTATGACCTTGAAAGGCAAAGAAACCAGACTCAAAAGCTCTCAAAGAGGAAAAATGGCCCTTCCCTTTGCTATGGAAATTCGAGTCCCTAAAAAACTGAGCTCCTAAGTTCTACTCTCAAATCCTCAAAAAGTGTAACTCAGTATCAGCTAACCCACGGGGCATTAGACACATAGA
n278994:5421033	1.92441	3.14855	2.33657	3.93099	2.27292	5421033	1188	NONMMUT007249	1874	| AK043717 | mRNAlike lncRNA | Mus musculus | Mouse noncoding transcript | FANTOM3 | A830023H09 | http://fantom3.gsc.riken.jp/db/annotate/main.cgi?masterid=A830023H09 | -0.8588370 | -0.2322348	NOCODE4.0		chr10	108446605	108449061	+	TGGCCTTCGATGGAGACTTACCGTAACCTTCAAACACCACAACCTTATCACAGCTGCCACCCTGTCCCTTCTGTTGCTTCCCTGGAAACCTCTGTGGAGGGGCACTTCTCCTTGTGTTCAGGAAGTGCAAACATTAACATAAGAGCAGTTTAGTGAGGATATTTGCTTGCATCTGGGTACAAACATGAAAGGGTTCCCCCCCCCCCCGTAATTGTTACTAAGTGTACTCTGTCAAAATTCTCTGCCTGCCACTTGCCATAAGCCTCCTTAGTGGCACCTCAGCTCAGTGCCCTGGATCCCGAAAGTCTTAAGGCTGGCAGTATTCATTTTCAATGTCTAAAGTCAGTTGCTTTCAAAGTCTCTGCCTCCTCCTTCAAAGAGGTAGAGGTGATAATCCTT…
n279025:5270347	5.21195	4.19013	3.85232	3.02361	4.61511	5270347	500	NONMMUT016268	2964	| AK043676 | mRNAlike lncRNA | Mus musculus | Mouse noncoding transcript | FANTOM3 | A830019C02 | http://fantom3.gsc.riken.jp/db/annotate/main.cgi?masterid=A830019C02 | 0.3324940 | -0.2496006	NOCODE4.0		chr13	6592196	6595160	-	CCAGCTGCATTGGTGATCTCAGTCATTTGATGTTCTCCATGAGCCCCGTGCTCCTCCCCATTCTCCACTCCACCTAAAGAAGTGTTGGGATGGGCTTTGCGCCGAAAGGCCCCCAACCTCACTCTCTTTCCCCACCTCCTCTTCAATGCTGAGAAAGGAGCAGCAGTTCCATCTAATGACTAACCCTCGATGCACCTCTGTCCCCTCGGCCTGCTACCTGCTTTGCTGTCTGCTTTGCCCCACCTTAGCCACTTGTGTCTTCTTCCTGTGGGACAAGGTGAGGGCTGAGGGATATACCCAGTGGCCTGTGAATAGTTGAAGCATGCCCTTCGCCTGCCCAGATGCCAATTCTGGCCTCTCGTGGGCTCTGCTGGCCCATGTGGACCAACTTCCCGCTGG…
n279042:5562045	3.12682	3.85303	4.12977	5.64447	3.87687	5562045	152	NONMMUT018492	1582	| AK043655 | mRNAlike lncRNA | Mus musculus | Mouse noncoding transcript | FANTOM3 | A830015L05 | http://fantom3.gsc.riken.jp/db/annotate/main.cgi?masterid=A830015L05 | -1.2478200 | -0.3998195	NOCODE4.0		chr13	83660339	83661918	+	TGATGACAGCCGACTGAGCACAGTTCACCCTGATCAGTCACTCAACGCCAGTCCACACTTAATGGCTTAATGCTTTTCTCTTAGGTTAAGGGTTGTCCTAAGTCTCCCAGAGTGCACTCTCATTCAGTGACGATCAGAGACACAGTAATGGC
n279078:5106418	7.59727	6.67241	6.12496	5.40805	6.13156	5106418	243	NONMMUT023864	789	| AK043599 | mRNAlike lncRNA | Mus musculus | Mouse noncoding transcript | FANTOM3 | A830011J18 | http://fantom3.gsc.riken.jp/db/annotate/main.cgi?masterid=A830011J18 | -1.0378800 | -0.1561391	NOCODE4.0		chr15	72501872	72502663	-	ACGGGGTTGAAGAACTCTCTGGCCAGTGTCACGGTCCAGGAGGGTGCCATTGTGCATCCTGAGCCTTGGTGGGAATCGACCTTTTTGTCCTAGGGTTTGTGGGTACATTTGCATGACAGGTCCAACACAGAGAGCAGGCCTTTAGCGGAACCCTGCACCAGAAGAGGCAACACCAGCGATCCCTGCCCAACTCCAGAGTCATCTGCACTCCTGTGTGTGTCCTGTATTCATCGTCGCTGCCTG
n279181:4475019	3.73452	2.1965	1.93248	1.71182	2.10683	4475019	198	NONMMUT055908	3170	| AK043453 | mRNAlike lncRNA | Mus musculus | Mouse noncoding transcript | FANTOM3 | A730096M12 | http://fantom3.gsc.riken.jp/db/annotate/main.cgi?masterid=A730096M12 | -0.1866630 | -0.3948924	NOCODE4.0		chr6	21258920	21262090	+	TAAATGGGACAGTAGTGAATGACTCAAAAGAAGAGATAAGATAAGATCTAAGGGCCTGTGATAGGGACTGGAGAACCTTTTGTATTTTTAAAGTCACAAGAAGAGAAGGTTTTAAAGGTCTTTGAGGGGAACAGTTCAACACCATGATTGCAGTCTCAACCTGTAACTACAAAACACGTATCCTTATCAGACTCTGGC
n279328:4780647	6.21339	5.07945	4.38061	3.70663	4.9543	4780647	268	NONMMUT014665	1816	| AK139256 | mRNAlike lncRNA | Mus musculus | Mouse noncoding transcript | FANTOM3 | A730081K04 | http://fantom3.gsc.riken.jp/db/annotate/main.cgi?masterid=A730081K04 | -1.0760800 | -0.3830980	NOCODE4.0		chr12	74296667	74298481	+	CTTGTCATGGGCCTTTAAGAGTTTAGACTTTATTATGAGCTTTTTTTTTTTTTTCCTTATAGGCTGTGAAGCTCAGGAAATGGGTAGGCAGGAAGAACATGGTTTTTTAGTAGGTTTATACGTTTTTTAAAAACCTGCTCTGGAAAGTTGGTGAGAATGACAGAATTTAGACATGATGATATTGCTTCACCTTGCTAAGAGCTCACTCGAGGTGCCAGAGTAAGACATTGCACTGATTTTTGTACAGTAGTCGATCGCTTACCGCTTA
n279372:5205406	4.62586	3.74325	2.10013	2.39511	4.1	5205406	122	NONMMUT034181	3039	| AK043251 | mRNAlike lncRNA | Mus musculus | Mouse noncoding transcript | FANTOM3 | A730076F20 | http://fantom3.gsc.riken.jp/db/annotate/main.cgi?masterid=A730076F20 | -0.8681010 | -0.2883799	NOCODE4.0		chr19	22503400	22506434	+	ATCTGTCCACTATGCATGTCAACGGACCGACCTCTCTAAGCTCTGCAGCCACTTGATTATTCTGTGTGGTCAGCTCAACTCATCTGTGCAGCTGTGTCACCTCTGTGGTTAGTATGGCTTCC
n279374:4430099	5.4218	3.59287	3.62138	2.82497	3.41781	4430099	522	NONMMUT027273	3557	| AK043250 | mRNAlike lncRNA | Mus musculus | Mouse noncoding transcript | FANTOM3 | A730076E23 | http://fantom3.gsc.riken.jp/db/annotate/main.cgi?masterid=A730076E23 | -1.2313700 | -0.3864793	NOCODE4.0		chr16	75082197	75085753	-	TGTGTCTAATAGTTCATGGGCCTTGTTTCCCTGAGATAAATAGAATATACTAATGTGATCCTATAATCTCAAGTCACCTTGATAAAATTTGTAGAGTACCTTATTAATAGAAAATTTTACTTTAAAATGCATTGACACACATAGTAAATTAGGTTGACTTTCAAATGTCATGGTTACTGGGTCTGTGTGCAGTATTTACAAGCAGGAAATTACACAGGGATTTTTTTTGACCCCTCTAGCTAAATTGCAAGTGTTTTCATCTTCTAACATATCTGATAGTGTTTGTTATGAGTTAATAGTTCAAGATTGAAGCTTTATGTAATCTACATGCTATATATTCAAAATATCCCCAAAGATCCAATGTCTATAGGCATTTTCATGATTTTTTACAAAACCAGT…
n279396:4905240	4.38692	3.02059	2.64542	2.19612	3.22675	4905240	431	n279396	1009	| AK043227 | mRNAlike lncRNA | Mus musculus | Mouse noncoding transcript | FANTOM3 | A730072G01 | http://fantom3.gsc.riken.jp/db/annotate/main.cgi?masterid=A730072G01 | 0.7701540 | -0.1593511	NOCODE3.0		chr7	18884692	18885700	+	CTGGTGCTGGATCTGCAATCTCCTGTGGGTGCTGAGGCTTTCTCCCCTGTAAGAGGGGACAGGAGCTGCTTCACATACAAGGTGACTTTCATATGTATCTTTCCTAAAGGCCTAGGCCTTGCCAGGACAACACCAGGCTGAGCCTTGCACCAAGTGAGTGGGCATATTGCAAGGCAGGACCAGGGAAACAGATGCTCAGGGCCCAGCTTCCTCTTCTGCAAAGGTCAACGGTATTATGGCCCCTAATACCCAATACCCAGGAAACTGGCTAGCATATGGCAGGAGCCCCAAAGCTATGGGCTAATGTCTCCTGTGTGCCAGAGTTCTAGATGGGAGCATTGCTTGAAGCATATCACGATAGCCCTGTGTGCATAAAGACAGAAAAAGATGTGTTTGGGG…
n279405:5085311	5.51136	3.68556	4.0679	2.55979	3.39161	5085311	343	NONMMUT021906	2041	| AK043222 | mRNAlike lncRNA | Mus musculus | Mouse noncoding transcript | FANTOM3 | A730072C08 | http://fantom3.gsc.riken.jp/db/annotate/main.cgi?masterid=A730072C08 | 0.3870540 | -0.3096649	NOCODE4.0		chr14	93537991	93540031	-	CATGTAGGACACACGTTTTTAAAGCATGGCATGCAGCTGTCTTAGGATGTCCTACAATCACCTTGCTTTTCACCTATATTGAAAGCTATTTTCCTCTCAATTTTTTTCCAAGGGAAGGTATTTTCTCCTTTCCTTCATATCTGTTTTTGAATCAAAGGTATATTGAAATCATTGCAGAACACATTCCAAAATAATTCTGAGATTTAAAAACTTAGTTCCCAGAACACAGTGATTTTTCTCATACCTTGTATAGAAACCTGGTTATAGATATTGGGGAAAAAAAAACCAAATAAATAATGATCTTCTTCTCCATGGAAGAGATTCTGCTCACAAAGTAAGTAAG
n279414:5250313	5.75327	3.89869	2.69072	2.98519	5.06628	5250313	452	NONMMUT065659	2499	| AK043213 | mRNAlike lncRNA | Mus musculus | Mouse noncoding transcript | FANTOM3 | A730071F05 | http://fantom3.gsc.riken.jp/db/annotate/main.cgi?masterid=A730071F05 | -1.2698500 | -0.4212998	NOCODE4.0		chr8	55005284	55007781	+	GTGACCGTTGTGGAATACTATCCTATTGTGGTATTAAGTTACGCTTCCCAATGATTAGGAATGCTGACCGCTTTTTAATGCCTTTGAAGAACATTACTTATGACTTCTGTTTTAATTTTTAGCTTGTTTGCTATTGAATTGAGGTCACTGTGAATCTTTTGTAGTAACTCCTTATTGGATTTATTGCTTTCAAATTACTTTTTACAATCAGTTGGTGGTCTCTACCCATTGTTGTTTTTCCTCTTGATTTTATTTTTAAATCTGTTTTACTACTTTAGAATCTGCATAGGAAGAGATTATATGGAGTAATTTGTTAGTTTGACAAAATTATTTGCTTGTCATCTTTCAAAGGAATAGGTTGGCTGTATGTTCACTTCAGTTATTAGACACACACACACA…
n279461:4742557	2.35504	3.92022	5.39538	5.1366	3.2624	4742557	167	NONMMUT017621	671	| AK080506 | mRNAlike lncRNA | Mus musculus | Mouse noncoding transcript | FANTOM3 | A730063C02 | http://fantom3.gsc.riken.jp/db/annotate/main.cgi?masterid=A730063C02 | -0.9219430 | -0.2459976	NOCODE4.0		chr13	54730243	54730910	-	TGTGTATCCTCTCTCTAAAGCCCTCACTTCAGTCCTGTCTACATTCTCTAGTGGATCGGAAATGGACAAGAAGGAGGGACGAACATCTGGATTCATTCTAGTGTCTTAAAAAAGAATAAAACAGGTACATAGGGCTTCTAGCTCAGGGTGATGAATGTCTGGGCTTC
n279483:4435391	5.25127	4.06535	3.82211	3.15591	4.33521	4435391	451	NONMMUT021918	1530	| AK043146 | mRNAlike lncRNA | Mus musculus | Mouse noncoding transcript | FANTOM3 | A730060A13 | http://fantom3.gsc.riken.jp/db/annotate/main.cgi?masterid=A730060A13 | -1.1389300 | -0.3426427	NOCODE4.0		chr14	93711377	93712906	-	GCTAACAGGTTTTTCAGGACTTGTAGGGAAGTAGTCTTAAATTATTAATCCAAGTAGATCCTTAAATTAACCTTCCAGTTTAACATTAGCATTAGCATTACATTTCCCTATGCAAGATGGGTTATTTTTTTTTAAGTCACGAGACCTGGCTTTTGGTGTAAGTGGCATATTTTAAACCCTGAGAGCTCATGTCGGGCTGTTCGATTCCATTTTTCTTGGAATGACAACATGCATCCTAACCAATACATTTACTTTTACTGAAAAACTTTGCATGCACCCCCACTCCCCGGGATGTTATCTCTGACAATGCATCCTGAATGTCTCCCAGTGAAATTTTGAATGGGAATTGATAGGCAGCAGGGTTGAGGTAGAAATAGAACACTCATAGAGATCTCCTGG…
n279544:5385526	5.52859	4.31674	3.73846	2.49567	4.71656	5385526	714	NONMMUT032959	1220	| AK043078 | mRNAlike lncRNA | Mus musculus | Mouse noncoding transcript | FANTOM3 | A730054A16 | http://fantom3.gsc.riken.jp/db/annotate/main.cgi?masterid=A730054A16 | -1.1049200 | -0.3074335	NOCODE4.0		chr18	72174062	72175282	-	TAGACTTCTAGGTGCGTGTACTTCACCGAGGAAGCAGCTGATGCCTCTAAGCTATCTCCTCTCTTCTTGACAATTATCAGGTCTGCTTTTGATCAGTTGAGTTATGCCTTTAAGATTTTGATCAGTTGGGCTATGCCTTTAAGATGTGTATTATCAGGCTCTGCAGACTTCATGTGTGATGTGTGGTTCATATAAACCATGGAAACCTAAGACTCTCATCCACTTGAATCCAGGAGAGCAAGCAGCCACTATAAATCCTGATCCCAAGAGCAGGCTGGAAATGACTAAGGTTCTGCTCCACATTTGCCAGAGTAAATCATTGAACACTTACTTTAAATAAAGAAATATGGTAGTCAGATGATAAACTGTTTTAAACATGTTTAAAAGTAGGGTAATATA…
n279563:5597455	1.76273	3.48107	3.75217	4.43046	1.70185	5597455	373	NONMMUT035870	1841	| AK080488 | mRNAlike lncRNA | Mus musculus | Mouse noncoding transcript | FANTOM3 | A730051I19 | http://fantom3.gsc.riken.jp/db/annotate/main.cgi?masterid=A730051I19 | 1.8403700 | -0.4435711	NOCODE4.0		chr2	16427616	16429457	+	TGACAGCTAATCTTAGTGATCCGTCTCTTTCTAACATCCCTTCACTAGGAATTATAGGTTGAGACAGAGCTCTGCTAGGTAATATATGTGGTTTCTATAACTTCAAATCAAGGATTTGTTGTGTGTGGCAGGAGCTTCAATCACTGAACCATCTTTCCAGCCTTTTGATTATTTAATTTTTAATTGAGGCAGTTTTTATTGCATTGGTCCATAAAATCCTGTAGTAAAAATTGATTTAAAGGAAGGGAGATTCTATATAAAGATATAAAGATAGATAGATAGATAGATAGATAGATAGATAGATAGATAGATAGATATGGGAACTGTTTCAGTGCATATCAGACAATGCTTCTGGTTGATTAACACGGTGTTA
n279623:4515393	3.98775	2.02408	3.42355	1.90034	2.09992	4515393	398	NONMMUT014424	1231	| AK042974 | mRNAlike lncRNA | Mus musculus | Mouse noncoding transcript | FANTOM3 | A730044E24 | http://fantom3.gsc.riken.jp/db/annotate/main.cgi?masterid=A730044E24 | -1.3353800 | -0.3924839	NOCODE4.0		chr12	66668848	66670079	-	GTAAAAGCAAGTCCAATGTGTCATCTCATTTTAAATCACATAGATTTAACAAATATCAGTGAATAATTACAGGTAGTATATGGTAAATGACCACATCTTTATGGCTTTCCCTGGAAATACCTAGAGAATTATTCTGAGAATTGCAAGCTTTTCTTTTTTCTAAAGTGTTTTTCAAAATGACCGATCATGTGTTTTAATTTGACTAAGAAGAATATTCTACAATAAGATTGTACAAGACTCTGAAGTAGTTCACAAAAAGCACCTAACATTTATCATGTTCCTTCACTAATTGGCTTCCACTGTGCGTGGAGGATTAATCTATTTACTTGACAAATATTTTATTGAGAAAGTCAGTTTCCCAACATAATTTTTATTTGCAATTTCATGGAGCTTATGTC
n279641:5386136	4.84474	3.25125	2.82035	2.23274	2.90327	5386136	63	NONMMUT067081	1941	| AK042944 | mRNAlike lncRNA | Mus musculus | Mouse noncoding transcript | FANTOM3 | A730042F04 | http://fantom3.gsc.riken.jp/db/annotate/main.cgi?masterid=A730042F04 | -1.2246700 | -0.2943242	NOCODE4.0		chr8	108526936	108537126	-	CGTTCGGTTTGATTTGAACAGCTTGCTGCTCTAAATGGCATGCGGAAGGAGGATAATTAAAAA
n279644:4690549	3.823	2.04253	3.13131	1.73523	3.7118	4690549	777	NONMMUT031504	3185	| AK080479 | mRNAlike lncRNA | Mus musculus | Mouse noncoding transcript | FANTOM3 | A730041N23 | http://fantom3.gsc.riken.jp/db/annotate/main.cgi?masterid=A730041N23 | 0.0416316 | -0.3412842	NOCODE4.0		chr18	12050552	12066498	-	GCTGGCCTGGATTTTCATCTGCTAAGAATGCCAGACCTGGAAGCCAGTGAGTCCTATGGTCCATGATAGTTAATAGAGTTGATAGCTGGCCCTCCTCTGAGAGTAGCCAATACATACACAGGGAGCAGTTGACCCAGGCAACGTGGGTATTTGTACTGAACTAGCAACCGTCTGCTCAAAATGAATGGGTCCATTGATGCTAAACCCCAATAAAGGTTTAGAATTTGTATTTCTTCATCTTTGATCTGCATGTTCACTGCAGTTCATAGCTATAATATACTCATAGAGGACCTGGTGTAGACCCACAAAGGCCCAGTGCTTGCTGCTTCAGTCTCTGTGAGAGCATATGCACTGTGCTTAGTTGACTCAGGATTCTGTGTTCTCCTGGTGTCCTCTATT…
n279660:5341017	7.02167	5.47483	5.52904	4.72242	5.30766	5341017	411	NONMMUT021921	1164	| AK042923 | mRNAlike lncRNA | Mus musculus | Mouse noncoding transcript | FANTOM3 | A730039P14 | http://fantom3.gsc.riken.jp/db/annotate/main.cgi?masterid=A730039P14 | -1.0738600 | -0.4722595	NOCODE4.0		chr14	93786492	93787654	-	CTTGATGTATTCTAAACGGGATTCCACTCCGTGTGTGCTTTAATTCTCTGTGGTAAACCACCTGCTACTGCAAAGAAGATGGTTTACATCCCAAGCACAACTAAATTAATAATGATGTGAAACATGCCAGGTCATATGGCTTTTTTTCTGGTCAAATAAACTCATTTTAAAACGTTACTTGTTTTACATTTGGAGGGTGACCTGGGTAAATTGTGGTGACATCCAGAAAATTACTTATTAGGAAAAGATATTTAGGATAAATAGGTTGTACTTTGAAAGTGTTGCAGCATCATAGATATAAATATTTAGAAGCTTGGTTGCATTTGATACTTATTTCAGACCAAATTCATTTGAATAGTATAAAATTATCAGCTTTGTAAAAACTGGTGGCCATTCGGG…
n279696:4639201	5.19885	4.24684	4.14291	3.05823	3.99049	4639201	331	NONMMUT057234	1217	| AK163142 | mRNAlike lncRNA | Mus musculus | Mouse noncoding transcript | FANTOM3 | A730032P09 | http://fantom3.gsc.riken.jp/db/annotate/main.cgi?masterid=A730032P09 | 0.0558894 | -0.3239024	NOCODE4.0		chr6	63649998	63651213	+	TTCCATGGCAACTAGAACCTCAGTAGCACCATGAAAAATCTGGCCTTCTTGATGTGGAAAGGGCAGGTCCAAAAGTCCTTTCAAATTACTACTCTAATTTCAAGCTAGAGAGTTTTTATTGTGTTGCTTTTTTTTCTCTACCTATTGACATAATCTATCAAAAAAAAAAAAAAAAAAACTCTCAGTGCTGTGCCTGAAAGCAAAGTTCAAACATCACTGACATGGTTGCCACTATACAGACAGCAGTGTTCCTTAAATAGAGACCGACAGAAGGAGCTGTCCCCAAAGTGGAATTGCAACACTGATTGGTGTCAGGCTCTGTCTAAGATGA
n279707:5036545	2.81741	3.97101	3.83392	5.85034	4.37805	5036545	120	NONMMUT041037	1929	| AK042861 | mRNAlike lncRNA | Mus musculus | Mouse noncoding transcript | FANTOM3 | A730032A03 | http://fantom3.gsc.riken.jp/db/annotate/main.cgi?masterid=A730032A03 | -0.9030970 | -0.2449258	NOCODE4.0		chr2	164177583	164196564	+	GCAGCATATCTCCTGATCTCCACAGTCATTGTCACTGTAACACTGGGGATCATCTTGCCTGATGCAGCGGACGTAGTCGGGCGGGCAAACTCTTTTCTCTTTATTTGGTGGAAGAAGGCA
n279755:4996924	1.77132	2.41523	2.95507	3.85302	1.62846	4996924	220	NONMMUT022654	1590	| AK042806 | mRNAlike lncRNA | Mus musculus | Mouse noncoding transcript | FANTOM3 | A730026C13 | http://fantom3.gsc.riken.jp/db/annotate/main.cgi?masterid=A730026C13 | -1.1635600 | -0.2939034	NOCODE4.0		chr15	6701610	6703201	+	CGGAAGAATTGGGATTCTACAGATCCCAGGAGTTCCCAGAGCGGCCTTCCCCCTTAGCTTATGACTATATACCAAGCTAAATGAATTTAAGGAGGATGTTTTAAACTATACATCACAAAATGTACACATGGTCTAAACACAGTCTTCCAGAGCCAGATGTGATGGTCCATGCCTGCCATTCCAGCGCTCAAGAGGCTGGGACAGAAGTATTGCAGGTGCA
n279955:4672031	3.35332	4.13621	3.94526	5.44437	2.78977	4672031	83	NONMMUT052582	2512	| AK042572 | mRNAlike lncRNA | Mus musculus | Mouse noncoding transcript | FANTOM3 | A730006P06 | http://fantom3.gsc.riken.jp/db/annotate/main.cgi?masterid=A730006P06 | -0.9886870 | -0.2974369	NOCODE4.0		chr5	66688882	66691393	+	AATGGACTCCGGACAGAATGAAGACATTTGCCCCGGGTCTTGGTCACATCAAGCCAGAGTTGATCACATAAAGCCGAGGAGAG
n279976:5245136	5.41262	3.52405	2.31277	1.94512	3.70308	5245136	908	NONMMUT000399	1715	| AK042543 | mRNAlike lncRNA | Mus musculus | Mouse noncoding transcript | FANTOM3 | A730003G23 | http://fantom3.gsc.riken.jp/db/annotate/main.cgi?masterid=A730003G23 | -1.2971400 | -0.3225212	NOCODE4.0		chr1	25483910	25485624	-	TAAAGCAGTCTTCGTGGGTCACTTGCTCTTCACTGTAGTCAGAGACCTGAGGCTTTGTTGCCTCCTCCCTCTCTTCATTTCTCTACAAGTATGCAGACTGCTAAGTATAGCCATGTCTTCCTCCTTCCTTCATAAAGAGAAGTGTATCATCTGTATGTGTGTTTATCTGTCTATCTATCTGTCTGTCTAATTGTCTTTACTGGTAATTTTTCAGCTACCTGCTATACCCCCATCATCTTCTGAAGTTCTTTTGTATGATAACCTCTCTCAATTCTTGCTCAAAAATAAAAGCCTTTTCAAATGCCCGATTATCAAGCCTTTCAATCTCATTAAACATTTTGGTTTTCTCAAATATCTCAGGAAAGTTATACCTCTTTATTATCTAATATAAATAGCTTG…
n279987:4799536	3.06024	5.5257	5.50865	5.29195	3.02803	4799536	172	NONMMUT001721	1291	| AK080406 | mRNAlike lncRNA | Mus musculus | Mouse noncoding transcript | FANTOM3 | A730002A21 | http://fantom3.gsc.riken.jp/db/annotate/main.cgi?masterid=A730002A21 | -1.0364300 | -0.3725590	NOCODE4.0		chr1	83331297	83332586	-	CTGGAGATATGTGAGTTCCAACACAAGAATCAATGATAAGAAGGCAGGCATGAGACTGAAGAGATAGCTAAGCAATTAAGAATCCTGGCTGCTAATGCTGAGGACCCCAATTCAGTTCCTAGCGCCCACAGGGTGGCTCACAACCATCTATAACTCCAATACTCCAAGAGGT
n280030:5390018	3.57006	3.60111	4.14635	6.56494	4.28843	5390018	309	NONMMUT000334	3758	| AK042483 | mRNAlike lncRNA | Mus musculus | Mouse noncoding transcript | FANTOM3 | A630095M19 | http://fantom3.gsc.riken.jp/db/annotate/main.cgi?masterid=A630095M19 | -1.0400500 | -0.3582633	NOCODE4.0		chr1	21944058	21951906	-	GGTCAAGCAGCAACTATATTAGGTGAGAAGCATTCAGTCCTTGTGCTTGTGTTGTTCCTGTTGACTTCTAAAGGGATTCAGGCCACCTGTTTGGTGTGACCATGATCTCTCTTTGATGAATGTTGAAAGTCACTCCACTGAGAACAGAATTGCATCTCTACCAAGAAAAATCTCCTTACATGGTTCCCCAGGGTTTTGTATCCAGTGTTGATCTTGATGAGTTACTTCACAAATTCCTGTTTTTAAACAAGTTGGGTCATGCTGCTGAGAGCTGTTTTCCAGAGCTCCTGGGCGTGTAGTTTTATTCTA
n280107:4527312	4.41998	2.95907	2.26926	2.29117	3.43158	4527312	341	NONMMUT006343	1698	| AK042384 | mRNAlike lncRNA | Mus musculus | Mouse noncoding transcript | FANTOM3 | A630086O03 | http://fantom3.gsc.riken.jp/db/annotate/main.cgi?masterid=A630086O03 | -1.3440400 | -0.2414598	NOCODE4.0		chr10	78591712	78593411	+	GGCCCGCTCCAGCAGGAAGCGCATTCCGGGAATGCTTGGCCTTAACTTTTTTTTTTTTTTTTTCTTTTCCTTTCCCGCGGCCCGAGCAGGCGATGCTGGGAGATGTAGTCGCCTGGGGCCGGGAGGGGACATGATGGGGTGCTGGGCTGATCTAACTCTTCAACTATGAATGTCATGGCATAGGCTGGGCCCCCCATAACCATCCTCCTTGTGTGATGGCATGCAGCACATTCTGTCGGCTCCCCCAAACCGCATCCAAGGCACACATCAGCTCATGTCTTTCCTCCTGTCCGTCCATCCATCCCCACATCACCCAGTACCTCGACCACGATCTTTCCTTG
n280184:5158542	5.08343	4.03316	3.27268	2.99731	3.87691	5158542	141	NONMMUT005549	2472	| AK153756 | mRNAlike lncRNA | Mus musculus | Mouse noncoding transcript | FANTOM3 | A630076G06 | http://fantom3.gsc.riken.jp/db/annotate/main.cgi?masterid=A630076G06 | 0.3774900 | -0.3332850	NOCODE4.0		chr10	49700362	49702834	-	TAAGTCTAATGATTGCAACAGGCACAAAGAACAAAATGAGATTTATAGTTGAGAAAGGTCTCAGTTGCTCAGCTTCTTTGATAGCACACATGATTTATTCACAATGCATATATAATAGCATGTGTTTTACTCCTTAATACA
n280271:4641824	5.50212	5.5051	3.90559	3.26414	5.61003	4641824	258	NONMMUT000206	653	| AK080352 | mRNAlike lncRNA | Mus musculus | Mouse noncoding transcript | FANTOM3 | A630063H21 | http://fantom3.gsc.riken.jp/db/annotate/main.cgi?masterid=A630063H21 | -1.0277600 | -0.4154905	NOCODE4.0		chr1	14756194	14776931	+	CGTGCTCCACACCATGACTTGCTGACCTTGCCAGAAGTCCATGAACAGACCATAAAGTAAAACCTTCAAAACTACAAGCCAAAATAATAATTCTCTGGTTATTCCTGGTTCTTTTCTCTTGTATTTGTTACAGGGACAGAAAACGAATCCAGTGATAAACATAACTGGTTGGCCAGACCTACTATTTACTGTTCTGTTTTCTGCTCTGCTTGACGTTCTCATCCCTCTGACTTCATTGCCGCCTATGGGTTGTTTAAA
n280291:4479393	1.93034	3.58508	2.15509	3.94257	2.78548	4479393	220	NONMMUT040170	1366	| AK042109 | mRNAlike lncRNA | Mus musculus | Mouse noncoding transcript | FANTOM3 | A630059F15 | http://fantom3.gsc.riken.jp/db/annotate/main.cgi?masterid=A630059F15 | -1.0426400 | -0.3822114	NOCODE4.0		chr2	140912725	140914091	+	CAGCGAGTTGCTATGAGCCCAAGGCAACTTCCCTGCAAAGTAATCCAGGTGCCGCATGCTACTGCTGAACAGCCTTGCATGGCTGTGGAGAACAGTTTCTGTCTAGTGCCCAGGCTTCTTGTGAGTTTTTGGTGTTGCCTCTAGGCACACCTTTTCTCCCCTGAATCTTCTTCAAGGGGACTGTGTGTTTCATGGGCTGTTGGTACTCTAGGCCTTGGAA
n280307:5494674	2.26461	3.34219	2.94119	4.56899	2.97092	5494674	410	NONMMUT017064	2251	| AK042092 | mRNAlike lncRNA | Mus musculus | Mouse noncoding transcript | FANTOM3 | A630057J07 | http://fantom3.gsc.riken.jp/db/annotate/main.cgi?masterid=A630057J07 | 0.0076948 | -0.2762025	NOCODE4.0		chr13	37790467	37792718	+	CTGGTTAAGCGCTCATCATTTGTTCTCTGAGAGTGACTTTAATCACACATCTGGAGAACCAGCTGGTGCTTTCTGGATAGCTCTGTGCTTGGTTTCCATCCAAATGGAGGGTCTCAGGTGTGTGCATGCCTTTGGTACCAGCACTGAAGAAGCAGAAGCAGGGAGAAGCTAGCCTGGTCTGCAGAGTGAGCTCCAGGCCAGTTAAGGCTACATTCATAATGAAACTCTGCTTCCCTAACTCCTGAACCCCCCTCCAAAAAAAAAAAGAAGGTTTTAGGTTTGGGAAGGTCTTTTAATTTTTACATTAGAAGATGAATAGAAAAGAATTGCTAAATTGGACATTGCTTTTGGGCTAGGGCTTTCGGCTCAGTGATCGAGTAGCTTTCCTGACATGTATGA…
n280495:5410705	1.9386	4.55277	4.53885	4.89152	4.59228	5410705	530	NONMMUT036824	1699	| AK041794 | mRNAlike lncRNA | Mus musculus | Mouse noncoding transcript | FANTOM3 | A630038H09 | http://fantom3.gsc.riken.jp/db/annotate/main.cgi?masterid=A630038H09 | -1.1305600 | -0.3196218	NOCODE4.0		chr2	34749974	34751666	-	GGAGCTTCCTATGCTGACCAGGTTGGCTTACAGTATACAGAGATCCACTTGCTTCTGCCTCCCTATTGCTGGGATTAAAGGCATGAGCCACTACACTCAGCTGATTAAAAGAAGTTTTAATCTGATAATAACTGGTGACTATGTAGCAGAAATGATAATTTTAGAAAGAACATATAGAGTGTAGATTGGTACAGGTGCCATTGGAGATTGTATTATAGTTCTTCCTCTTGTAATTCTTATTGACGTTGAAATATTTGTAAGAGAATACAGATAGGAGGTGGTGACAACAGTGACGGTATGTGTGAATTCCTCTCCTTTTCCTTCCTTCCTGTTTGTTTTTGTTTTTTTGAGACAGGGTTTCTTTGTGTAGCCCTGGCTGTCCTGGAACTCATGCCTGCC…
n280508:4323727	5.172	3.33563	2.4465	2.08095	2.79697	4323727	394	NONMMUT027272	3025	| AK041773 | mRNAlike lncRNA | Mus musculus | Mouse noncoding transcript | FANTOM3 | A630036G19 | http://fantom3.gsc.riken.jp/db/annotate/main.cgi?masterid=A630036G19 | -1.2558600 | -0.3588335	NOCODE4.0		chr16	75031906	75034931	-	TTCATTGGTGTGACTATCGTACATCTTCTTTTTCTTCTATTTTTTTTAAAGCAGATTGTCTGGAACTCTAAGTTTTATAAGAACTCCTCTAGAGTCTTTGGGTGAAACTAGACGATAACATCAAGCTACACGATTTCTATAAAGAGATCTCAGGGATACCATTGAAGAGTCCTTTAAATTTTGCATTCAGCTTAATCCAAAAAGGTTGTCTCCTTTCAAACTCCTGACAGATACCTGTTGGGTAGATTCTATAGAGGATATTCAATGTGATCATACCAAAAATCTAGAAAGAAATTACTTAAGCCAAGAAAGATAGAGAAAGATACCAAACTTTGGAGGCAACAAGCTTATCTTTAATCATTATGATTACATCCATGGGTGTAGTCAAACACTG
n280508:4868527	4.67779	3.10363	2.86689	2.32097	2.76169	4868527	385	NONMMUT027272	3025	| AK041773 | mRNAlike lncRNA | Mus musculus | Mouse noncoding transcript | FANTOM3 | A630036G19 | http://fantom3.gsc.riken.jp/db/annotate/main.cgi?masterid=A630036G19 | -1.2558600 | -0.3588335	NOCODE4.0		chr16	75031906	75034931	-	ACTCCATGGCATGTAATTTGGTTGCTGGACATAAATACATTTTGGAGAGCAGATCTGTAACTGAACGTTTGACTTTAAAGCCACTGTCTGTCACTTCGTTCTTGTCATTACTCTTCATAGGAAATATTCTTGGAGAAAACTCACAGGTTTTGGCAGCTGGGAGCTTAATGTGAAATGCCTTCCAGGCATAAAATACAAGCACCAGAACTACAGCTGAAGCATTTTACGGTTTTATTTTTGTGTTTAGGTAGAAATGAAGAGGACATAAAAATGAGAAGTAAAATAAATTCTGCTCTCATAATTTGATGTGTCTTTCAAAGTCCATGTTTGAAAGGAAATCATTACCGACCTCTCACAATGCTGTCAGCCCAGCAAGTAAAATTTC
n280727:4390946	1.92322	1.86621	3.17509	5.02849	2.02476	4390946	54	NONMMUT032255	488	| AK041437 | mRNAlike lncRNA | Mus musculus | Mouse noncoding transcript | FANTOM3 | A630008O17 | http://fantom3.gsc.riken.jp/db/annotate/main.cgi?masterid=A630008O17 | -0.8743170 | -0.3142686	NOCODE4.0		chr18	46357871	46427043	-	CCTGAAAGCAATGTCAGTTATAATGTCAGTGTGTTCTGAGGGTTACTTTCGGAA
n280835:4823653	3.78345	4.26826	4.78392	6.15136	3.59126	4823653	543	NONMMUT018968	2802	| AK041240 | mRNAlike lncRNA | Mus musculus | Mouse noncoding transcript | FANTOM3 | A530094B17 | http://fantom3.gsc.riken.jp/db/annotate/main.cgi?masterid=A530094B17 | -1.1949900 | -0.3309125	NOCODE4.0		chr13	103295789	103298589	-	AGTGGGGACCTAACTCAAGAGCTTAGATACTGTTGTATCAGACATCACATTGTCGCCACTTACATGAAGGCAACCATTGGTTGGTTGCTTAGGAGCAGGTGTGGAGAGAAGAGATGGGGTCCTGGCTTGAATCCAAGGAGCTCCAATAGATGGGTTTGGAGGAAGAAGGAGGAATTAGGAGAATGAGAAGTCAGGAAACTGAGGAAAGCCCAAGGGTCCTGAGAAATGAGAGGAGCGTTTGGGGGAGGGGAGGACTAAGTAAATGTTCTAGAAGGAGATTGCGTTAAAACACAGAAAAATAACTTGGCAGAGACACACATCCTGCTTTATAGATTTGGTTTTGTGGACCCCAGTGTTCTATAGGGAGAGAAGCAATATCGAGAATTCATGATTTGACAA…
n280892:5575795	4.58326	2.68057	2.64026	2.53394	2.90763	5575795	56	n280892	1111	| AK041163 | mRNAlike lncRNA | Mus musculus | Mouse noncoding transcript | FANTOM3 | A530086N07 | http://fantom3.gsc.riken.jp/db/annotate/main.cgi?masterid=A530086N07 | 2.2699100 | -0.2202100	NOCODE3.0		chr11	76243754	76244862	+	CGTGTCTGTTAGAACTTCATGTATCCCTCCATGCCAAGAGCGTTGATAATCATCCC
n281034:4682631	2.43689	5.28965	4.96323	4.68258	2.84766	4682631	475	NONMMUT004639	2101	| AK080120 | mRNAlike lncRNA | Mus musculus | Mouse noncoding transcript | FANTOM3 | A530064P14 | http://fantom3.gsc.riken.jp/db/annotate/main.cgi?masterid=A530064P14 | -1.0641100 | -0.3115689	NOCODE4.0		chr10	8438897	8440998	-	TTCAGTATGAGATAAAGAGCCCTTTATCTGGGTGATGAGCATCAGAGTTGTAGGTGTGGGTGTTGTGGGGAGGAGGCAGATGGAGTATGTAAGACAGATACTGACAGGTTTCATTGATTTAGTCCATGAGATGGCCATTTATGGAGGAGCACATGTTAAGATGTGGAAACTGGAGCTAACCATATGAGTTTGAAGATACGTGTGTTTTGGTGAAGAACGTGTTGTTGTGTGTCATGTTAGCTATTTAGGTGAAGGAGCACTTATATAACTGTTGCTATGCAAAAACAGTGTATGCTTTTGCATTTTCTACACTGTCATGGTTTGAATAAAAATGGCCCCCGTATAGGTTGATATTTTTGATCTTCAGTTGGAGGAACTGTTTGGGAAGGATTAGGAGGT…
n281289:4537585	8.48082	7.78025	7.65484	5.74811	6.7006	4537585	303	NONMMUT072610	1856	| AK040793 | mRNAlike lncRNA | Mus musculus | Mouse noncoding transcript | FANTOM3 | A530025K03 | http://fantom3.gsc.riken.jp/db/annotate/main.cgi?masterid=A530025K03 | -1.2288700 | -0.3005014	NOCODE4.0		chrX	61126209	61128064	+	AATGTGACACACCACTCCAATTTGCACACAATCTGGTGTATGCAGTTTCTAAATGTTCTGTGTATGTCTTATGATACAGTCTCAAAATACAGATTCCTTAGAATCATATAGCATAGCATAGCATAGCATCTTAGAAACTCTTCTCAAAACATTCACTATAACAGGCAGACACACAGCCTGTATTCCTGTCTTCAAACATACAGATTTGCCTTCCCCTACCTACCTTTTGGCCATCAGTTCTAAGATATTTTACACAAAACCCACTTGCTAGATGGGCATTGTGTATACAAAGGCTCTAAGTTC
n281289:4964861	8.5177	8.27927	7.65757	6.02048	7.01931	4964861	241	NONMMUT072610	1856	| AK040793 | mRNAlike lncRNA | Mus musculus | Mouse noncoding transcript | FANTOM3 | A530025K03 | http://fantom3.gsc.riken.jp/db/annotate/main.cgi?masterid=A530025K03 | -1.2288700 | -0.3005014	NOCODE4.0		chrX	61126209	61128064	+	AGACACCAGTACTCTGCACTACAGAAAATCACACAGGAAGATTCATGCTGGTCTCACAATATATAGACACAACAACCACACATTTCTATGCCTCAAAGACACAGAATCTCCTCAAAACATATACATTCACTAAAATATATTTGGACCAAGACAGCATCCAGACGATTACCCCAATACATAAATACTGAAGCATAGCAAAGAATCCTGTATTCAAACTGCATAGATATGTTTCACCACTGGA
n281422:4312226	5.35644	4.643	3.35646	2.95704	5.08753	4312226	79	NONMMUT065909	1784	| AK138907 | mRNAlike lncRNA | Mus musculus | Mouse noncoding transcript | FANTOM3 | A430110F06 | http://fantom3.gsc.riken.jp/db/annotate/main.cgi?masterid=A430110F06 | 0.7082320 | -0.2873047	NOCODE4.0		chr8	69165744	69184215	-	GAAAAAGAGAAAGGGGCACTGCACAAAATACACCGAAAAATCAAAATCTGCAGCCATTTGCAGCTATCCCCAAGGCGGA
n281564:4325879	5.82039	5.79593	5.22995	3.76948	5.39778	4325879	397	NONMMUT037208	1812	| AK040455 | mRNAlike lncRNA | Mus musculus | Mouse noncoding transcript | FANTOM3 | A430099A21 | http://fantom3.gsc.riken.jp/db/annotate/main.cgi?masterid=A430099A21 | -0.8694420 | -0.2076724	NOCODE4.0		chr2	49722323	49730298	-	TGCCGTCCACAACAGGCGTGATGTTGTCTATGATGGGTGTGTTGTCACAGGGCTCTAGGCTCTTCTGGTCCTTGGCGCTGATCTGTTCGTCCTCGGGTACAGCTTCCCCTGAGAAAATACAGCAAGCAGGATGCTGAGAACTAAAGAAATCAAGCATGCAACCCTCCAGGAAGAGCTCTAAGAATTGCCGCTCCCAGTGACAAAGACACAGCAGACACAACAGAGAGTCCTTGTGTAGAGCTACAGTCCATTCTTTCTGCTTGGGAAGAAAGGTGTAGCTAATCGACCACTGTTAGACCAAGAATGCATGGCAGAAATCAAACGGCTGCACTGGCCACAGAGCTCATCCAACTGCTCCAACCCCAGCACTGCCTGCGAGCTCCTGCATACATGTTTC
n281568:4793906	4.74729	2.98936	2.17463	2.62031	3.81854	4793906	321	NONMMUT002930	3068	| AK040453 | mRNAlike lncRNA | Mus musculus | Mouse noncoding transcript | FANTOM3 | A430098J12 | http://fantom3.gsc.riken.jp/db/annotate/main.cgi?masterid=A430098J12 | -1.1285400 | -0.3407785	NOCODE4.0		chr1	137951577	137954643	+	GATGCTAGCATTCCATGGGGCAATGCTGTGATGACATTGATTTAAAGCAATTCTGAAGTTTCAGATTTTTAAGTGTATTTGTGAAGCAAAAGAGAATGCCATTTGAGGTGAGGAAGAAATACATTCTGCCACAAGAAACACAAAACTCTCTACCTTCTACCTCTGAGCCGAGCTAACAGAAATAAATATGTAAGAGGACTTTGAATGTGGAATGAATCTGATAAAATACCACACAGACTAACCCATGAATTTCACCAAGCTCCACTGGGACAGCAGGTTCAAGACCATCAAAGCAATGGCTCTAGATTATGCAGACACCTC
n281597:5157655	4.0874	3.20419	3.67686	1.94429	2.98183	5157655	607	NONMMUT061431	3197	| AK040434 | mRNAlike lncRNA | Mus musculus | Mouse noncoding transcript | FANTOM3 | A430095B04 | http://fantom3.gsc.riken.jp/db/annotate/main.cgi?masterid=A430095B04 | -0.4752730 | -0.4435635	NOCODE4.0		chr7	59318630	59321823	+	TCTCTGCCCTAATTCACTTTGTGTTACATTTGCATGGAAGGGCCCTTTTTCTCAATCTTTTACTGCCAACCTGTTTTTTTGTTTTTGTTTTCCTGGTTACTTCTGCTCTTTTAATTTATTGCTCGTATATGTAAATGATCACTGACAAATGTTTGCTTTATATAGTTTGGTCCTTGTGTGTCTCTTTTTTTTCTTTTTTTTCTTTTTTTAATCTTTTACTGTTTGGCTTGCGATTTCCTCCAATACAGCCATTAATACTCATCTCTTTTTTGGGGGACGGAGGGTAATGTCACATTTTGGCTCGTTGTTTGCTTTTGTGTGTGTTCTTCAGTATTCTTTGTAGAAACCATAGGGCATTATATACATTCTTCCTAATATAAAAACAATTTTCATTGAAGT…
n281631:4805617	4.76393	3.27134	3.05376	2.51708	3.0129	4805617	518	NONMMUT048860	1747	| AK040401 | mRNAlike lncRNA | Mus musculus | Mouse noncoding transcript | FANTOM3 | A430091L06 | http://fantom3.gsc.riken.jp/db/annotate/main.cgi?masterid=A430091L06 | 0.0489015 | -0.2468200	NOCODE4.0		chr4	116626941	116628685	+	TGTTTAGATCCACCGCCTTTGACTGATCCAATCCGTTGCTGCCATCATCTTACTTTACCCACGTCCAAGTTGTTAAGTTAAATCCTGTACTTAAAACACTTTAAATATTTTAGCTGTCTCTCTTTTTTTTTCTTTCATATATATTAGGTAGGGACTTACAGTCTATCCCTGGCTAGCCTGAAACTTGCTATTTAGACCCACTGATCTCTAACCCACAGACATCTGCCTGCCTGTGATTGCGAGGGCTGGGATTACAGGTGAGCAGCACCACACACGCCTTCTTTTACAACCTTTTGTAACTCCAGTTCAAGGGCATTCAATCAATGCCTTCCTGTGACCACCAGAGCCACTAGGCACACACATGGTACACATTTATGTATGCAGATACACTCATACACA…
n281645:4656842	5.66386	2.49567	1.76995	1.70542	4.26882	4656842	136	NONMMUT071121	802	| AK040381 | mRNAlike lncRNA | Mus musculus | Mouse noncoding transcript | FANTOM3 | A430089O21 | http://fantom3.gsc.riken.jp/db/annotate/main.cgi?masterid=A430089O21 | -1.2413000 | -0.2864708	NOCODE4.0		chr9	112146530	112147331	-	TCTGGGGTCTTCCTACGAAGTACCATTTATTACATGGAGGATTCACGGTTTAAACCTGTTGAACACGCTCAAACTTACCTTGTCAAATTAAGCCGAGTTAAGATTTCCCTGGAAGGCTACAATTCCCAATCCTGGA
n281645:5246393	4.37107	3.05807	3.3833	2.21484	3.4865	5246393	351	NONMMUT071121	802	| AK040381 | mRNAlike lncRNA | Mus musculus | Mouse noncoding transcript | FANTOM3 | A430089O21 | http://fantom3.gsc.riken.jp/db/annotate/main.cgi?masterid=A430089O21 | -1.2413000 | -0.2864708	NOCODE4.0		chr9	112146530	112147331	-	TTGAGTTCTGTGCTGGACTAACAGCTCAGAGAGCCAGACCTGTTTTCATCACTTTCTGTCTGACGTGTGTTATAAGGCCAGATGTAAACAGTGTTATTAAAACCACTCAGTATCAGGTCTTCAAGATGGCTCAGAGGATAAAGTTGCTTTACAACAAGACTCATGAGTTCAGTTCCATCCCCAAGACCCACATGGTAGAGAGAACCAAATCCTGTATGTTACTTTTTGACCTACACACAGAGGACTTGGTACACACACACACACACACACACACACACACACACACACACACTTAAAATATATTCAGTAGTTATTGTGTGCATATTCTAAGTACTAGGAAGGGTTGATCTC
n281740:4500928	1.93289	4.14727	5.21935	4.44178	2.06163	4500928	376	NONMMUT072222	2055	| AK040262 | mRNAlike lncRNA | Mus musculus | Mouse noncoding transcript | FANTOM3 | A430081E24 | http://fantom3.gsc.riken.jp/db/annotate/main.cgi?masterid=A430081E24 | -0.9812920 | -0.4159141	NOCODE4.0		chrX	41869344	41871399	-	ACTGCAAGTGCACAAGCTAAGGCTACATTCAGTTTAAATTTACCTTTTTCTTTGAAGTCAGGTTTTGGTAGCTGATCTAGTTTCTTTTGTACTTTTGTCCTATGGTGATTGAACATCAGGTGAGTGAGCCTCTAGCCCTGAAGGAGTCTTGCTGTCTTCTATGGCCTTGACTATGTCAGTGACCTGTTTTTAAAACTCCTCTAGTACAGATTTCTTTTCTTTCCAGAACAGGCTGTGCATTTTTCCCTGCAGATTTTACCCTCTTTTATCTAGCTTGTGAAGCTTGTCAGTACTGTCATACTGTACTGTTTTTTCTTCCTTGTACTGTGTCATGTCCTTACTTAAGATAGTGTTCTCTCGCTCTTGAGATCTCATG
n281813:4387856	2.04892	2.24421	2.67505	4.07346	2.21706	4387856	469	NONMMUT040061	3050	| AK040182 | mRNAlike lncRNA | Mus musculus | Mouse noncoding transcript | FANTOM3 | A430075C09 | http://fantom3.gsc.riken.jp/db/annotate/main.cgi?masterid=A430075C09 | -1.1771500 | -0.3291131	NOCODE4.0		chr2	135086023	135089071	+	GAGGCATGCTCTCTCTATAGCAATGTGTGGATAATCTGACAGGATGCCCTATTCATTCTACACTGGAGCTTTCCTAATTGAGTCATTCTGAGGCTCTTATGGCTTCTTGTATTAAATTTTCAATCTGTTGATGAAGTGTTTTATCTTTGGAGTCTGATAGCATCTTGGAATCACACCTGTATTTGGGAAGACAAATACCAAAAATTATCCATGTAGAATGTAATATTAAAATGTCTTGCACCTTGCAAGAGAAGATTCCATTACTATAGCATATTTTATTATTGTGAAAATACCTGCTGCCCTTCCTACCCTATACTTCCATGTTTAGCTTCTGCTGTCAGAAGACCCTTCCATGTCATCGTTGCAAGGTTCAAATGTGGCTTGCTTTGAACAGTGAAG…
n282058:5047640	6.21663	4.15689	4.43219	3.5905	5.36612	5047640	1101	n282058	2818	| AK039945 | mRNAlike lncRNA | Mus musculus | Mouse noncoding transcript | FANTOM3 | A430034K01 | http://fantom3.gsc.riken.jp/db/annotate/main.cgi?masterid=A430034K01 | 5.4455000 | -0.3094080	NOCODE3.0		chr14	45167354	45219390	-	CACATTCGATGATGGTGGGCAATACTTTCTCTGAAATGTTAGAGGCTTGTCTTGAGTTTGTGAATACCCTTCAGTAGATTTTCTCACATGATACATCTTTAAAACACGATTCATGTGCTTTACAACTAACAGCACCACAAAGTGTAAATTAAAAGAAGTACAAGTTGCCCCATCTAGTCACTCAGAAAGTGCAGATCAGATGGTCATTATTCCTGCACCTCATGCAGATGGAGTGGGGATGCCTCAGTGGGCAAACTGTAGAATGTCATCTTGTAGTGAGAAGCATTGCATTTAAACTGTATTTGAACATAACAGAAGAAGAAGCTGATAAGCATAAAAGGGGTTATTTTTCTTAGGAACATCTTATCAAGCGCCCTTTAGGAAATACTATCTCAGGTG…
n282149:4809619	4.62019	3.70724	3.06571	2.50288	3.69883	4809619	374	NONMMUT037278	767	| AK079699 | mRNAlike lncRNA | Mus musculus | Mouse noncoding transcript | FANTOM3 | A430018G15 | http://fantom3.gsc.riken.jp/db/annotate/main.cgi?masterid=A430018G15 | -1.2612700 | -0.2417482	NOCODE4.0		chr2	52425011	52434885	+	CTCAAAGCCTATGTCGGGAGTCATGGCTGCACCCCCCGGGCGATCCTCGGTTCCTATGGGGCTTATAAGTGTCCTGGTACGAGTCCGGGTAATCTTCTTCCACCAGAGGGTAGTGGTCTCGGCTGTGCTGGGAGCTGGAAGACAAGCGGTTCCTACTCTTGCGGGCCCTCTCATTGTGGTAATTTTCATCCGAGGTCATTAGGCTTCGTCTTTCAATTGGAGAATTCTCTGTAGAATGGTTGCTGTGTCTCATTCGCTGACTCTAAGAATATCAGACAGTTCACTGGTTAGATAAGGTCAGCTTCATTTAGCTAAACATGCTAACGCGTGTGTGTGTGTGTGCAGTAACAGGGTCTATACAACGAGCTGCTGTC
n282195:4324848	2.24119	4.7872	3.90896	5.20021	3.85955	4324848	287	NONMMUT055421	1639	| AK138685 | mRNAlike lncRNA | Mus musculus | Mouse noncoding transcript | FANTOM3 | A430008F17 | http://fantom3.gsc.riken.jp/db/annotate/main.cgi?masterid=A430008F17 | 0.5686960 | -0.2371726	NOCODE4.0		chr5	149399489	149401127	+	TGGAGTCTTTCATCTAGCCGGTGTGAAGATGACAGGTTCTAATGAGAAAAGAAAAAAAGCCAAGCAGGATTTATCTCGCTCGGAAAACACAAACAGGGAGACCTAAGAGACCCCACAAGAGCGCTGCAAAGAGTTCAAAGAGGAGGGGAATTCTGGCAGCCACAGAAAAGTCCTGGAGAAAGAGGAAGTGGGGCAGCTGAATGCCACCCACCGTTCTACCTGGAAGGCCAGTGCTTTCACAGGCTCTGCAGACGGTGATAGAAGCACCCATGCTTGATGAGGCCATG
n282201:4357239	2.04932	3.4733	3.60142	4.12603	3.55492	4357239	482	NONMMUT005755	750	| AK079672 | mRNAlike lncRNA | Mus musculus | Mouse noncoding transcript | FANTOM3 | A430004I23 | http://fantom3.gsc.riken.jp/db/annotate/main.cgi?masterid=A430004I23 | -0.4750340 | -0.3240306	NOCODE4.0		chr10	59408985	59409728	+	TTCGGTACATAGACCCACGTGCAGGCAAAGCACCCATACACACAAAATAATAAAAGGCAATTTAAAAAGAAACTATAAAAAAGCATTGCCTGTGAATTCAGACATTAGTTTTATTTACGCTTATAGACGAGCAATCTGGAGAAGAGATAAAAGTCCCCTCGTTTTATTTCCAGGAGACAACATTGAATTAAACCACATGGCTCCATTGTTTGTCCATGTGTGACTCAACTCTTGTCAGACTGTTCCCCAGTTCTGTCTGTCTGTCTGTCTCTCTCTCAAACACACATACACACACACACTCACAATACTTACACACACTCACATATACTCATTCATATCCACACACATGCTCACATACACTCACTCTCACACACACACACATGATGAGATGATAATGGA…
n282214:4682925	1.7493	4.25535	4.05216	4.25136	3.41163	4682925	612	NONMMUT063929	884	| AK039798 | mRNAlike lncRNA | Mus musculus | Mouse noncoding transcript | FANTOM3 | A430002A09 | http://fantom3.gsc.riken.jp/db/annotate/main.cgi?masterid=A430002A09 | -1.0899300 | -0.4755288	NOCODE4.0		chr7	131420683	131421566	+	CTGTGAATGCAGTTAGGAAACGCTCTAGGAGCATTTAAAATAACACTGCACTATGCCAAAGCATGGTGGAAAGGTGGTCCTCTCTAACACATTGGCTGAATGTAACAAGAATGGCAATAGTTTTGCCAGAACATTCCACAGTCAAGCATTCTTAACTTCTCAGCACTTTGAGTGCAGCATATGTGGCAGTATAGTAAAGGTTTATAGACCTTTCCTCCAAATGTTTAAAATGCATAAAATAAAAGATACAGCGTTATAAAGGAAATCAATTATAATGAAACAGTTATAAAATGTCTTAATGCGATTGAGCAGTGTGTGCTTTTAAATAGAGCTTGGCAGTCATTCTAATAGCCACTGTAATTTTGCCATAATGATGAACAAAAATATATTTCAAGATAC…
n282223:5350589	4.96333	3.40026	4.14468	2.57906	3.85651	5350589	481	NONMMUT068938	1876	| AK039784 | mRNAlike lncRNA | Mus musculus | Mouse noncoding transcript | FANTOM3 | A330108B13 | http://fantom3.gsc.riken.jp/db/annotate/main.cgi?masterid=A330108B13 | -1.2398600 | -0.3674449	NOCODE4.0		chr9	45962865	45964741	-	CCTCTGCCTGATCACATTATGTAGCCATTCTGAATGAAAGATGTTTAGTGTTTAGCTGAACAATGTTTGTCTTTGATACAGTGTAATCCCACATAGGCCTCTGGCCTCATTTCCTGGCTCATTTAAACTTAGTTTATTTATAAACACAATTTTCTAAAACCAGGTTTTGCTATATAGCCCTGGCTGGGCTCACACTGATGACTTTGCCTCAGCCTCTTAGGTTCTGAGATTACAGGTCTGCACTACCATGCCTGGCTTACACAAAGACACTTAACACTGAGTCAACACACTAGTAAAGAATCAAATACAACAGCATGCTTGTCGGCAGCTCCTGGCTTACACGGTCAGCCTTCCCTTCCATACATAAGTACGGCTGTTCCAAGGTGAGACTACTCTCTG…
n282231:4918028	7.46262	5.64191	4.93716	3.94704	6.05592	4918028	243	NONMMUT045141	3922	| AK039779 | mRNAlike lncRNA | Mus musculus | Mouse noncoding transcript | FANTOM3 | A330107D21 | http://fantom3.gsc.riken.jp/db/annotate/main.cgi?masterid=A330107D21 | -1.0413300 | -0.3825579	NOCODE4.0		chr3	125724976	125728899	+	TTAACCCAGCGTCTGAATGAAGGGCTAATGTTTCTAAGCACCATTTATCCATTGGTCCAGCATCCCACTTCATCGCTATGGCATGCCATCCTCAGAAAACTCCAACATGGTCTCTGGAGAGCCCCAGGAAATTGGGAAATTGTGATTCTGAACTGTAGTACCCTAGAAAGTGAGGGCCATCTTTAGTGGGCTCATGGTCTTGCTACATTTTCAGTCTAGATTCTCCTACCTTGGCAGTGATTG
n282235:5385315	5.61303	4.05233	3.72877	3.52837	3.71226	5385315	233	NONMMUT011534	3742	| AK039768 | mRNAlike lncRNA | Mus musculus | Mouse noncoding transcript | FANTOM3 | A330105L03 | http://fantom3.gsc.riken.jp/db/annotate/main.cgi?masterid=A330105L03 | -0.9171920 | -0.2586614	NOCODE4.0		chr11	93378487	93382228	+	TACTTAAGGGTATGCTGTGGCGATAAGAACAACAGACTTGAGTGCTATGCATATCTCTAAATATTTACAAGTCCGTCTACCACCTGCAACCCATCAAAAGGTGCTATACTTTCTACAATGGAAAACTTCAAACCGGTGGCAAGGGAGAGATGCTACTTTCCCTTAGGAAGGAGGCTGCTCCATTTGCCTCCAGAAAGAGGGGAGATTGCAGTCCTTACTGTCTGGATGTATTA
n282263:5038156	5.27152	3.803	3.67101	3.17881	4.03305	5038156	247	NONMMUT070203	2504	| AK039736 | mRNAlike lncRNA | Mus musculus | Mouse noncoding transcript | FANTOM3 | A330101I18 | http://fantom3.gsc.riken.jp/db/annotate/main.cgi?masterid=A330101I18 | -1.1292900 | -0.3498583	NOCODE4.0		chr9	81628296	81630797	-	AGTGATCGTCAATCCACAGCTCTTAACAACTCAAAACATGATGTGTGCTAGTGCCAAAGTCTGCAGGCTGCTTTGTTTTCTAATCTCACGTACCTGTCATTTCACACACTTAAATCCCCACGGAAAGAGGATAGGCTGGGTTGCTCAGCCCAACCTGCAGCTGTCAGAGTTCAAGTGGATTAGAGTTGTATACTGTTCCTTAACAAGAAAGTAGCTTTTTTCATTATCCAGTTCCATGCTGCGCAGA
n282283:4380345	4.91981	4.30264	2.45922	2.36487	3.44694	4380345	288	n282283	1835	| AK039718 | mRNAlike lncRNA | Mus musculus | Mouse noncoding transcript | FANTOM3 | A330094N09 | http://fantom3.gsc.riken.jp/db/annotate/main.cgi?masterid=A330094N09 | 2.4547000 | -0.2412640	NOCODE3.0		chr10	63116276	63122684	-	CTCTGGTGTCTAAGCCGAAGTCATCTCTTTTACTGATGCCGCAGCCTGTGTTTTTCTATTTGTCGCTATCATCACTCTGGGATGTAATCACATGGCTCAGTCATGACTGAAATGGGGCTGAGACCGTTCAAAGTCAGTACCATTCATTCAGACCCCCCTTCAAGGCTGCAGCAGAGTCCCCACCCTTCCGTGTTTTCCTTTGCTCTATATTTGGTGTCAATAAGGATAAAGAATTCAGTCACCGGATGAATCTGCCTGTCTGTGTCGTCCACGTTGGCTGTTCTGTCA
n282351:4721395	6.13479	5.10295	5.04686	4.11751	4.99511	4721395	165	NONMMUT023865	1019	| AK039650 | mRNAlike lncRNA | Mus musculus | Mouse noncoding transcript | FANTOM3 | A330077P12 | http://fantom3.gsc.riken.jp/db/annotate/main.cgi?masterid=A330077P12 | -1.1438900 | -0.3818783	NOCODE4.0		chr15	72506990	72508007	-	CCCAGGCCCGTAGTCTTGTAGAATGCCTATGATCTGCTGTCGTCTGCTTGTTCCCTCGGCTTGAGGAACTGTCGACAAGAAAATGATGTAGTTGATGTTGTTTAGCCCTGATTTATGCATTTGATGTTTGTCTCTCTGGGGACCTCTGTGGTTACTGCTTTGTTG
n282369:5021694	2.14747	3.77433	4.29664	4.14932	2.26899	5021694	187	NONMMUT070777	755	| AK039631 | mRNAlike lncRNA | Mus musculus | Mouse noncoding transcript | FANTOM3 | A330075M10 | http://fantom3.gsc.riken.jp/db/annotate/main.cgi?masterid=A330075M10 | -1.4035000 | -0.1930471	NOCODE4.0		chr9	103752249	103761790	-	GGGACCTCTGACCAGACTATTCGCAATACGATAGGGCTTCAGGCAAAAGGCAGCTGGTCTCGAACTCTCTCTTGCTCTGCTCCTACAAATCACACTCCATACAAACCCACTCAACCACCGTGTGTAGAGATGTCTCCATGCACAGTACACATCCCCATCCCTTGGTCACCATTGTTCACACATTTTG
n282422:4350597	5.25236	3.55895	4.19947	2.94356	4.19947	4350597	600	NONMMUT015392	1223	| AK039577 | mRNAlike lncRNA | Mus musculus | Mouse noncoding transcript | FANTOM3 | A330065J12 | http://fantom3.gsc.riken.jp/db/annotate/main.cgi?masterid=A330065J12 | -1.0510200 | -0.1986587	NOCODE4.0		chr12	100290284	100302307	+	GGCTGTCGAATTCACCTGCACTGCATCCCGGAGAATCTTCTCAGCTAGACTGTAGCGGCCCAGCTGGTGAAGGACCAGAGCCTGCGGAGACAGACAGTCAGACACTCAAGGAGGGCCAGGTACCTACGTGACCTGGGCTCTGAGCAGAGACCCAAGAGGCAGGAATGTACCTCCTACTCTTGGCACACATGTTCTTGCCAACTCCTGAGCTTAGGAGCAGCAGCTGAAGACACTGACCACACGAAACTGCTGAAATTCATCTTTCAACTACAAGCAGGGCAGTTGTAGACTGATGTGTGGCTCACTGCGTTCAGGGGGCTATAGAAGTAGTAAGTGTGAGGTGGTCACCCTGGGCTGCGGTAAGACCCTGCCTCAAAAACAAAGCAAGTGACACTGCCA…
n282458:4823671	3.69083	4.08913	4.56691	5.80533	5.34435	4823671	139	NONMMUT072173	716	| AK039538 | mRNAlike lncRNA | Mus musculus | Mouse noncoding transcript | FANTOM3 | A330057O21 | http://fantom3.gsc.riken.jp/db/annotate/main.cgi?masterid=A330057O21 | -0.5568020 | -0.0988975	NOCODE4.0		chrX	38473745	38474460	+	TGTCCCTTAGGTCTACAGTTGGTGCTCCTGGCTTTACTGGCAGGCTGTGCTTTTGAAGTTTCTGCGTCCCTGCTCAGCCAGCATGCTATATACAAGCATGAGCATGCCAGGAAGCCCAGCTTTGGTTTGGGCTTAGCAA
n282477:4318261	7.1081	6.22145	5.41969	4.79628	5.96508	4318261	837	NONMMUT074554	4114	| AK079596 | mRNAlike lncRNA | Mus musculus | Mouse noncoding transcript | FANTOM3 | A330053K08 | http://fantom3.gsc.riken.jp/db/annotate/main.cgi?masterid=A330053K08 | -1.0573100 | -0.3232508	NOCODE4.0		chrX	160803028	160807142	-	CTGCATATCGCTTGTGCTCAGAACCTGTGTTCTGGATGACATTGCTTTTTCATTTGGGCGTTCGTTGCCTACTGTATTGGAGTGGGTTATTGAACCCCACAATGTGGGTACATATGAAGACCCACAGATGCCTACTTCTGTGAACTGGGACTATGATAGGTTTCACTACTCCAAGTCGGAAAGCAGTGGGATATTTATTTCCTTGCCTCCTTTAAGTTCATCACCAGTAAAAGTTCCTTAAAGCTCACTTAGGGCTTAAGAAATAACAGTCCTGGTTTCTTTAAAAGAGATTGTAGACAAGACAGTACAAATGTCACTCATCCCCAGGACTGGAATCTTAAGGAGAAGGCCCCTACTGAATTGTAAAAGGCCAGATTACCAGGAAAATAAACAGACAAA…
n282477:4600846	7.92594	7.20655	6.20704	5.69659	7.53245	4600846	975	NONMMUT074554	4114	| AK079596 | mRNAlike lncRNA | Mus musculus | Mouse noncoding transcript | FANTOM3 | A330053K08 | http://fantom3.gsc.riken.jp/db/annotate/main.cgi?masterid=A330053K08 | -1.0573100 | -0.3232508	NOCODE4.0		chrX	160803028	160807142	-	GGGGATCTTGCAAACCAGCTCTATGCTCCTGAATGCTGTCCACCCTCCTGGAGACTCTTGCCTTCAGGTGGGATCTGAGCTACGTGAATGGCATTTCTTCTTCTAACTGCTTTGTTGTTGTTGTTGTTGTTGCTGTTGTTGTTATTGTTGTTGCTCTTCTAATATATTTATAAGGCTCCTGAAGCAATTCCAGATGTAGAGAAAATTGCTCTGTCCTTTTTTCCTTCCTGGGACTGTCCATTTATAACAAGGTCATCATGTATACCTGTATATACATACACTCCATCCATCGGAACAGGACTACATCCTTCTCTCATTTGATCACTCTCAACTCCCAAGTTACTATCAAGTATCATCAAAGTATTATAAGGCCTCTGGCCAGCAAGCATTATACCCACC…
n282477:4636058	6.04585	5.096	4.02304	2.78208	5.52399	4636058	669	NONMMUT074554	4114	| AK079596 | mRNAlike lncRNA | Mus musculus | Mouse noncoding transcript | FANTOM3 | A330053K08 | http://fantom3.gsc.riken.jp/db/annotate/main.cgi?masterid=A330053K08 | -1.0573100 | -0.3232508	NOCODE4.0		chrX	160803028	160807142	-	TTGCTAGGCAACCTCCAGAGTGTTCCGGCCCATTACTAGTACCAAGGTTAAAAAGTACTGCCTGAGACCATTCCAGGCCAACCACTCTGCAGAATTTGCCTTCTGGCCTTGGCCTTTCCAGGCTCCATAACTGCAAGAGTGAATTCCTCAACATTGTATTCTCTTTAAGAATCCTCTACCACTGTTCTCAAATCCTTACTATCCTATTGTTTGTTTCCATTGTCTTGGACCTGCTAAAAGGTGCATACTTTGGGAGGAAACCAGAGTTACTTTATATATGTTTGAGAACTTAAATTCTAGGTTAGCATCCTTAGAAGATCTTTCTTAGCCGTGAGGCTTATATTTAGAAGCAAGCAGCAGCCTGGCAGATTGGCATGATTTTTACCAACTGCTCAAAGG…
n282504:5348421	4.7209	3.69982	3.58529	2.59583	3.54687	5348421	499	NONMMUT019670	627	| AK039493 | mRNAlike lncRNA | Mus musculus | Mouse noncoding transcript | FANTOM3 | A330050D14 | http://fantom3.gsc.riken.jp/db/annotate/main.cgi?masterid=A330050D14 | -1.2414400 | -0.3537672	NOCODE4.0		chr14	12408937	12409564	-	GGCTCTTTGTATGGGAATTGCAATCAAATCTTCACTTGGAAGTTAAAAGGGAGCCTTATCTGGCACAGATGGGGAAAATGGACTTCCTAACTAGGAGAACACAAGCACATTCCAGCCCTCTGGGCTTTAGTGTGAACCGATAATTAAAAGAAATATTCCTAATATACTTTGCAGAAGCAAGTTCTGTTTTGGGGTGTTTGTGGTGGGGAGGTAGTGGTTTTCAAAAATTCACAAGTAGTAATAGTCCACTGAGCCAGCATCTATGGCAGCAGTAAATCTCTGAGAAACCACACACACGCACACATTACACATACAGAGTTTAATTTCAGATTGCCCCAATTTTCTTTTCCCAATACAATCTTTACTCTCCTCCTCTGAGTGGATGATTTTGCCACTCTA…
n282622:4625049	4.36788	3.42567	2.20056	2.07567	4.6183	4625049	349	NONMMUT040164	1513	| AK039346 | mRNAlike lncRNA | Mus musculus | Mouse noncoding transcript | FANTOM3 | A330028N22 | http://fantom3.gsc.riken.jp/db/annotate/main.cgi?masterid=A330028N22 | -1.3185300 | -0.3722737	NOCODE4.0		chr2	140502883	140504395	+	TCGGCCTGCTCACCATAGAGTTTTCTTAGTCTTTTGGCCCAGTCTTTCTTTTGACATGTTTTGCTTCATTCACTTATTTTTTATGTTTTACTGCACCTTCATTCAATTTTTATCCCCTCAGCTAATAGGTGGCACCCCCATGCTTTCCCTTGTTTGGTATTGGGATTAGGTACTGAATGCAAGAAGACAGGTCCTGGGCTAGGATGCATCTTCATAGATATTACGGTAGAGCCACGGACCAAGTAATTGAAGTACATTAAGTTCTGTATTTTTGTAATACTGTGGATGGAACTGAGAACTTCATGTTCACTAGGCAAGTGGTTTGCCACTGCGCTGTATCCTAGTCCTA
n282659:4903478	8.33149	7.74036	6.45215	5.50741	6.47511	4903478	166	NONMMUT061936	548	| AK039294 | mRNAlike lncRNA | Mus musculus | Mouse noncoding transcript | FANTOM3 | A330017C21 | http://fantom3.gsc.riken.jp/db/annotate/main.cgi?masterid=A330017C21 | 1.2526300 | -0.1141155	NOCODE4.0		chr7	67222613	67224622	+	GGAATCGCTCTTTTCTCCCGCATTGAAACAGTCTGTTTCCCGCTGTTGACTCCATGCTATATACATGCTATATACATGCTGTATACATGCTATATACATGCTATATAGTACATGCTATAATCATGCTATATACTGGCAGAAGCTTTCACCAAGCTTGCATCAGCTA
n282720:4885634	5.91546	3.93621	3.96531	3.08339	4.47735	4885634	349	NONMMUT001319	3402	| AK039212 | mRNAlike lncRNA | Mus musculus | Mouse noncoding transcript | FANTOM3 | A230108F24 | http://fantom3.gsc.riken.jp/db/annotate/main.cgi?masterid=A230108F24 | -0.0516394 | -0.3661335	NOCODE4.0		chr1	66688935	66692337	+	CCTTGGGAGTGTTATCATCTGTTGCTTCTGCTTAACTTTTTATTTAAGTGATATGCTGCAATACATGGTTTACTTTTTATAATTTAATTACCCTTTTATTACTGAATGGCTCCTTGTTTACCTATCTCTTATTTAAAGAAATACTCTCAGGCATATTAGGAAGCATACAAATATGTAAACACTTTGAGACAGACCATCATGCTGTAACTATAAAAAGAGGTAATCTTTGTCAGAATCATTTTCCTAATATTACCTAAATTTCCCTGTTACAAATTATTTCTTTGTATTATAAATGACAACTAGTTTTTGAAGACTATTTAAATCAAGACTCTACTGTGCCCTGTTTGAA
n282779:5574933	4.91737	3.04438	3.16169	2.53072	3.53838	5574933	583	NONMMUT038518	3446	| AK039132 | mRNAlike lncRNA | Mus musculus | Mouse noncoding transcript | FANTOM3 | A230101G02 | http://fantom3.gsc.riken.jp/db/annotate/main.cgi?masterid=A230101G02 | -1.0536000 | -0.2242199	NOCODE4.0		chr2	92058718	92062163	+	TCCCTGCTTACAAGTGAGAGAGATAGGAACATACTCTCTTTGTTTATTGGCCATTTGCCTCTCCTCCTTTTTAAATTGGCCATTGGTTTATTTGACAGTGCATCTTTTGGTCATGTCCTATGTGTGGGAGTTCTTTATATATTCTGGATACTAATCCTTTGTCAGTCTGTGGCCCATCTGGTGTCTTTTATTCCACTCAATTGCAATTCTAAATTGATACGATTATTTGGTGAATGTCTGATTTTCCTCTTAAGCAATAAGTCCATGAGAAGACGACTGTCCCTTGTAATAAGTGCAATATTTAATACGTACCAGGAAGTTAATAAATACTACTGACTGAAATGTGTTGATAATTGACATTATTATTTTTAATTATTGAGTTTTCTCTCCTTCAAGCTT…
n282787:5524032	5.98786	3.56625	3.77227	3.63033	5.70476	5524032	590	NONMMUT047715	2593	| AK039121 | mRNAlike lncRNA | Mus musculus | Mouse noncoding transcript | FANTOM3 | A230098M10 | http://fantom3.gsc.riken.jp/db/annotate/main.cgi?masterid=A230098M10 | -1.1614200 | -0.3688360	NOCODE4.0		chr4	72201312	72203904	+	AGTTTGGGGCGTCAATACATCCGTCCCCATTGTTTTACTTTATAGAGACTTTCTGAAAGGAGCTTTCTGAAATAGATATAAATTTGCTCCTAACAGGTTTTTTTTTTCTTTGAAATACTCGAAAAAATGGGTATTACATTACGGTGTTTGAAATGATCTTTTTAAACATGTATACTACTTACGTGTCTGAAAGTGCATCAATTATAAATGAAAAACAGAAGAAAAGCATCAACCAATCTGTAGACCTCAATGAATGCTTAAACTGATTCAGTGTAATTTGAGGTTGTTGCTCTTTCTTGGAATTGGGAAGAGGTTTATGTTACTAGTTTTCATAGAATGCAAAATGAAAAAGAAGAAAACCAGGGCTCTCTTTCCTTGGTTAGATTTGGTGGTGTGTGG…
n282817:4694003	6.2334	5.1535	4.24734	3.77457	6.63673	4694003	151	NONMMUT066749	521	| AK162892 | mRNAlike lncRNA | Mus musculus | Mouse noncoding transcript | FANTOM3 | A230093N03 | http://fantom3.gsc.riken.jp/db/annotate/main.cgi?masterid=A230093N03 | -1.1789100 | -0.3086171	NOCODE4.0		chr8	93990798	94017814	-	GGTGTTCGTGTTAATGTTCTGGGAGAGTGGAGAAGTGTAAACGGCCTACCTGAGATTCAGAGTGCTGTCAGAAAGCAGTGCTTGAGCTGGAGTCACTCCTAATCCACTTTGTAACTTAAGCTGACTCGGATTCCTCCAACTGTAAGTGCTT
n282871:5040870	6.09522	4.96108	4.64768	3.05042	5.29876	5040870	487	NONMMUT033152	3169	| AK038999 | mRNAlike lncRNA | Mus musculus | Mouse noncoding transcript | FANTOM3 | A230083L10 | http://fantom3.gsc.riken.jp/db/annotate/main.cgi?masterid=A230083L10 | -1.2510200 | -0.3878076	NOCODE4.0		chr18	77666317	77669486	-	TTGTGTAGGGCCAAATCTTAAACCAGAATCTGGTGAGACTACTCTTCTATAGATATTAGTATCTGTTTACAGTGCACATATTTGGAGTATGCTTACATTATGTGAAAAGTTTTTTTTTAACTGCAGGACAACTTAGAACTATTAATATATCCTATATAGGGCACATATGCCCTATCTATCTATCTATCTATCTATCTATCTATCTATCTATCTATCTATCAGACAGGGTCTCATTGTAGCCCAGTTTGACTCCAGCTGGAGGATGGCCTTGAACTTCTGCACTCCCACCTTCACCTTCCAGATATTAGTATTAATAGGAATTCATCACCACATCTGGGTTCATGCAGTGTTGGAAATTGAACCCAGGCTTTATGTATGCTAGGCAAACACTCTACATCC…
n282951:4315277	4.2483	2.57398	2.49699	2.05331	3.15862	4315277	826	NONMMUT052212	1283	| AK138340 | mRNAlike lncRNA | Mus musculus | Mouse noncoding transcript | FANTOM3 | A230073I20 | http://fantom3.gsc.riken.jp/db/annotate/main.cgi?masterid=A230073I20 | -1.1070000 | -0.3062255	NOCODE4.0		chr5	48803911	48803999	-	TCGAGGTGTCTCATCCACATATATCTTGCTTTTTAATGAATGGTTTACATAAGTAAGTTGCATGGTTAGCATAGAAGACTTTATAGAAAGAGATCCCATGGGGAAAAAAGTTATCTTTTTCAGAAAAGAAGAAATTACATAGGACCAGAAAAATACAAAGATGAAAGCACACCCGGAGGGTGAGAAAGGGATGATGGGGTTGAAAAGGAAAGTCGTTGCATGGGACAATTCTGAAGATCCATCTATGAATACATTGTTTACAGCAAACTTAAGAGTCATGAGAAAGTCTTTCAAAGACTTCACTGGTCTACTTTATGTGCCCTAGGAAGAGAATTTGATGACCTTTTGCCCACAGTCCCAGTATCATGGAAAGAAGGAAAGTCAGTTGTAACTGTACAT…
n282951:5549942	4.87579	3.38486	2.9007	2.29574	4.23913	5549942	162	NONMMUT052212	1283	| AK138340 | mRNAlike lncRNA | Mus musculus | Mouse noncoding transcript | FANTOM3 | A230073I20 | http://fantom3.gsc.riken.jp/db/annotate/main.cgi?masterid=A230073I20 | -1.1070000 | -0.3062255	NOCODE4.0		chr5	48803911	48803999	-	CCAGATCTGTGTGCTTATTTAGTTATTATAAGACGTATCTCAAATAATAATCTTCTTTGTGCCTCTCTCCTTCTCAGCCTATCTTTAATTCTGGTTTTCTCACTTCTTTTGCCTTATTCTTAAATATTTCCTTTTTCTTTGACACATATTAGCTTGGAAAGA
n282953:5041517	4.20917	2.00936	2.17393	1.94789	2.80971	5041517	182	NONMMUT022365	1006	| AK038895 | mRNAlike lncRNA | Mus musculus | Mouse noncoding transcript | FANTOM3 | A230073A17 | http://fantom3.gsc.riken.jp/db/annotate/main.cgi?masterid=A230073A17 | -1.1352100 | -0.3462873	NOCODE4.0		chr14	115847276	115848282	+	TTTTGTGATTCGAAAATATTCCAGCACTTAAGAGGAAGTTTTCTGAAACCAAAACAAGATATTCTTGTTGAGAAATGAATTATTCACAGCAGAGGGAGGGTACAGCTGGGGCTTTGTTAATTGTCATAGATGCCTCATATTTATCCTTCACAAAGCACTGATATGGTAGAGCTATGACTTCA
n283002:4482336	3.62786	1.95216	2.20729	1.60209	2.89957	4482336	377	NONMMUT055914	3113	| AK038833 | mRNAlike lncRNA | Mus musculus | Mouse noncoding transcript | FANTOM3 | A230066L14 | http://fantom3.gsc.riken.jp/db/annotate/main.cgi?masterid=A230066L14 | -1.2748500 | -0.4273498	NOCODE4.0		chr6	21340823	21343932	+	GTGTGCATATGCGTATGAGTTCATATGTCTCCATGCAAACACACAGGTGCATGCATATTCATTATTAATATAATACATACATAATTTCTGCATGTCAAATAATTTACTATTATTATATGACATAATATGTTATTAGAATTACCTATGTTACTATTCCTATAGGCTTTGGGAAGTTATCCATATTTAATCATTTTCAATGTTTTTAATTTAATCTTCCTGATATTCCCTTGAATTGCTTATTTGATTTTTGTTCTCAGAATAGCTCCATATTCCTTGGAATGAAAGCCTATTTTGCAGACAAAACAAGTCTTAACACTGTACTTTAATAAGATTACAAACTATAGAGTGTATGGACTGACATTAGCATTTAGGTTACC
n283002:4760590	6.27534	4.47611	4.45956	3.06844	4.78829	4760590	287	NONMMUT055914	3113	| AK038833 | mRNAlike lncRNA | Mus musculus | Mouse noncoding transcript | FANTOM3 | A230066L14 | http://fantom3.gsc.riken.jp/db/annotate/main.cgi?masterid=A230066L14 | -1.2748500 | -0.4273498	NOCODE4.0		chr6	21340823	21343932	+	CCTGAGTTCTGCAGTGTCCTACAAATACATTCTGTTGCATGCCTACCAATCTCAGAAGAAAAAAAGTACAACTCGATAACTCTATGTGCCAGTGTAATAAAACCATTACTAGACTGATCATGGTGCCCTCCTCTGTAATCCCAGCACTCGTTAATCTGATGCGAGAGGACTATGAGCTCGAGGTTAGACTGGACTAAAAGGTGATACTCTGTCTCCAGGATGAACGAATGAACAAGCACTGACTGAATTACCACCTCCCATACCCAGTGAGATGCTAACGATATTTA
n283028:4926071	5.43113	4.41785	4.46972	3.15265	5.48131	4926071	265	NONMMUT012263	703	| AK038797 | mRNAlike lncRNA | Mus musculus | Mouse noncoding transcript | FANTOM3 | A230064C13 | http://fantom3.gsc.riken.jp/db/annotate/main.cgi?masterid=A230064C13 | 0.5081710 | -0.1302448	NOCODE4.0		chr11	104231478	104295317	+	CTCAGTGGGCTCTACCTTGAAAAGACATCTTAGCGCCAGGTCCTAGGGCACAAGTTCAGGAGACCCGAAGGAGTTGCCAATATCAAAGTTGGCCTCTGTAGACACAGACAGCGTTTTCTTATACCATCCTGGTTCAGGTCATGCCTAGCCCGGGGATGAGGCCAGTGGGTGACGCTCCCACAGGGTGCCCTGTGGCCTGTCAATCACATCACCAATGCACTTGTCATTCGAACTTCCTTCTCTGCAGTCTTCACACCTTATTAGG
n283046:4408894	2.93109	6.01058	5.77129	5.55258	4.51871	4408894	773	NONMMUT031926	2348	| AK038771 | mRNAlike lncRNA | Mus musculus | Mouse noncoding transcript | FANTOM3 | A230061J20 | http://fantom3.gsc.riken.jp/db/annotate/main.cgi?masterid=A230061J20 | -0.8953060 | -0.3807852	NOCODE4.0		chr18	34929397	34931905	-	CAAGTCCTGTGTGGGTGAAGTTTTAATAGGGTGTAAAAAGAGAGTTGACCAAAAGAGATCTTCTTCTTGGCTCCCCTTTATTTTTCTGGGTCTTAGACCTCTCCGAAGATGACTTGCCCTAAGTTTTCTAGTTACCCGGAGCTTCCTGGGTTTAGCTGTTCTAAGACCCGCCTATAAACCGAAAATGCCAGCGTGTGCGGGATGGAGTGGTGGTGTTTTGTCTGTTATGGACATAGTCCAGAGAAATCCAGGTAGTAGAATCCCTGATGGCTTTTCGGTGGAACTTCTTGGGAAAAATCACTCTCCAGTTGCCTGATGGAGTAACAGTGCTTAAAACTGACTAAAAATGAGCTTTCTTAAGTTTTCATTAGTGAGTCTCTTAAGTGTTTCTAAGAAGTT…
n283057:4713980	4.47118	2.62333	3.03772	2.00301	3.06511	4713980	425	NONMMUT061412	1013	| AK038761 | mRNAlike lncRNA | Mus musculus | Mouse noncoding transcript | FANTOM3 | A230060K18 | http://fantom3.gsc.riken.jp/db/annotate/main.cgi?masterid=A230060K18 | -1.0356000 | -0.4373493	NOCODE4.0		chr7	59262922	59263934	-	TGCTCCTGAGCACAGTGTAGCTCAAATCCTAACACTACAAAGAAAATAAAAGTATCAACATACTAACAAAGGTAAATTCACTGTAACATCCAACCTCTCACTAGAAATTTTTAAAGACAAAAATCTTTTCAATGATTACTATATCCAAAGTTATCTTTTAAATGTAATATAAAAACTTTCCAAGGTAGGCATAACATAAGGCCACTTGTGACCACTAAACTACAGTATACACTTAAAGGAAACTTACACATAGCAGAATGATACAAACAGAGGAGCTCAAGGAAAATGAATTTTGTAATTCTATATATGAAAAATTAAGAAAGAAGCAACTGTGTCTACATAAGTTAATGAAAGAAAAACAGAACAATGAAAGAAACAACAAAATATAAATGTTTTTAG…
n283061:5488487	4.40189	2.51657	2.29964	1.95412	3.02523	5488487	147	NONMMUT045689	2019	| AK038757 | mRNAlike lncRNA | Mus musculus | Mouse noncoding transcript | FANTOM3 | A230060E18 | http://fantom3.gsc.riken.jp/db/annotate/main.cgi?masterid=A230060E18 | -1.3178600 | -0.3889406	NOCODE4.0		chr3	146969755	146971772	+	GCAGCATAACTGCAGAAGCCATATCATAAAAAACACGCCTAAACACCCAGGCTTTCCTTCCTTCTCCAAATGAGGAAGAAGCCAAGGCTGTCTGGTATACCAACTCCTGTGCAGCCTTGTAACTGAAGGGCCTACCAGTACCAATGA
n283081:4621675	6.93565	6.00751	5.19867	3.82356	5.50652	4621675	473	NONMMUT011837	841	| AK138289 | mRNAlike lncRNA | Mus musculus | Mouse noncoding transcript | FANTOM3 | A230057H20 | http://fantom3.gsc.riken.jp/db/annotate/main.cgi?masterid=A230057H20 | -1.3353300 | -0.3316865	NOCODE4.0		chr11	97846889	97847729	+	TGCTCAAGTGGGTCTCAAGCTTCTGGGTTAAGTCAGCCACTCAAATAGAGAAAAAAAATTTTTTTTAATTCTAGCTGGCCTGGAATCCACTGTTGTGTTGATTTAAATAGGTTTGGCCCCCCATAGACTCGTGTTTGAATGCTTGGCCCACAGGGAATGACACTATTAGGAAGTGTGTCCTTGTTGGAGGAATTGTGTCACTGTGTAGGTAGGCTTTGTGGGTTCCTAGTGTTCAAGCTCTGCTCAGTGTGGAAGAGACAGTCTCTCCTAGCTGTCTTCGGATCAAGACTGCAACCATGTCGGCCTGCACACTGCTATGCGTCCTGCCATGATGATAACGGACTGTAAGCCAGCCCCAATGAAATGTTTGCCCTTCTAAGAGTTGCCATGGTCATGGTG…
n283110:4355729	5.98888	3.56267	2.12316	2.89181	3.98432	4355729	313	NONMMUT014417	2340	| AK038688 | mRNAlike lncRNA | Mus musculus | Mouse noncoding transcript | FANTOM3 | A230055C15 | http://fantom3.gsc.riken.jp/db/annotate/main.cgi?masterid=A230055C15 | -1.0608900 | -0.3706713	NOCODE4.0		chr12	66456102	66458442	-	ATCTTGCTAGGATACAGGGCTTCTGGTAGACTTCTACATCCTGTTGACTGTACCATACCTCACATTGTAGACTATTTGATTGTCTTAGAATATAAGCAAGTAAATATGGTTTTTCTTATTATTTTTAATGTATTCTCATCGCTCACCAAGTAAAGGCAGAATTATTAAAGTAATAAAATGTTCATATGGTCTACCTTACACCGTTCTCACTCCTGCCAGCAGTTCTTTATTTTGTTTTCCAAAAATCTGAGCTTGCCCAAGTGTTTCCAATATGGCTCTATAACCTTAAGGCTCTTGTGTCTAACCCTAAACA
n283122:4478892	4.48512	3.75449	2.37463	2.48475	3.31298	4478892	212	NONMMUT020412	3987	| AK038661 | mRNAlike lncRNA | Mus musculus | Mouse noncoding transcript | FANTOM3 | A230053E23 | http://fantom3.gsc.riken.jp/db/annotate/main.cgi?masterid=A230053E23 | -1.0547000 | -0.3744661	NOCODE4.0		chr14	38946036	38950024	-	TATGCTTGTAACCTCTGGCTTTTTAGGGTAATAGAATCATCTGATATGTGAACTGTGTTGCCTTTAAAGTAGGATATTGTTTAAATGATTCCTCACATTGTGGCAAGGGTCAATGGCTCATTCCTTTTTATGGCTTAATAGTGGCTCAACCAGATATGGTTTTAAGTATTCATTGGTTTATAGACATTTGACTTGTGCCTACCTTTTGGCTG
n283133:4430788	4.63813	3.97763	1.93098	2.2947	4.13032	4430788	454	NONMMUT043903	960	| AK038637 | mRNAlike lncRNA | Mus musculus | Mouse noncoding transcript | FANTOM3 | A230052A10 | http://fantom3.gsc.riken.jp/db/annotate/main.cgi?masterid=A230052A10 | -1.5906100 | -0.2817717	NOCODE4.0		chr3	88813055	88814014	-	ATCACGTTGTTAGGAGCTCTGTTCAGGTTGAGGTTCTTGATTCTCACCGTCAGCTGGTGAGCAGTCTTACAAGTTACAAGGTACTTGCTGATCAGAGGCTTAGGAAAATCGGTCCCTTCGAAATGCTTCAGTCCTAAAGCCAACAGACTGAGAGAGAACCAAAGTCACATATGGTTCTGCAAGGAGCTCTTCAACCTGCATGCTTCACAGCCTCCTCCCACACCCTTAGAGAGTTACAGATCACTGCGTATTTTAATAACCAAACATGAAAAGCTCAATGACCCTGGATTAATCACCAGCACTACTGAAAATAAATATGCTTAAAGCACTAACATTCTTGGTGACAGAAAAAAAAAAAATTCAAGCAACTGCATACTCTGAACACCGAGGTGGCTGAGG…
n283133:5422670	4.50216	4.26876	3.18376	2.34243	3.70693	5422670	454	NONMMUT043903	960	| AK038637 | mRNAlike lncRNA | Mus musculus | Mouse noncoding transcript | FANTOM3 | A230052A10 | http://fantom3.gsc.riken.jp/db/annotate/main.cgi?masterid=A230052A10 | -1.5906100 | -0.2817717	NOCODE4.0		chr3	88813055	88814014	-	ATCACGTTGTTAGGAGCTCTGTTCAGGTTGAGGTTCTTGATTCTCACCGTCAGCTGGTGAGCAGTCTTACAAGTTACAAGGTACTTGCTGATCAGAGGCTTAGGAAAATCGGTCCCTTCGAAATGCTTCAGTCCTAAAGCCAACAGACTGAGAGAGAACCAAAGTCACATATGGTTCTGCAAGGAGCTCTTCAACCTGCATGCTTCACAGCCTCCTCCCACACCCTTAGAGAGTTACAGATCACTGCGTATTTTAATAACCAAACATGAAAAGCTCAATGACCCTGGATTAATCACCAGCACTACTGAAAATAAATATGCTTAAAGCACTAACATTCTTGGTGACAGAAAAAAAAAAAATTCAAGCAACTGCATACTCTGAACACCGAGGTGGCTGAGG…
n283154:5292620	4.90464	3.36467	3.2315	2.19086	3.41856	5292620	1164	NONMMUT061932	2216	| AK038598 | mRNAlike lncRNA | Mus musculus | Mouse noncoding transcript | FANTOM3 | A230049F01 | http://fantom3.gsc.riken.jp/db/annotate/main.cgi?masterid=A230049F01 | -0.2230130 | -0.3053446	NOCODE4.0		chr7	67204081	67222458	-	AGGCTGCATCCTCCCATCTAGCAAGGCCTCCTAGACCTTAGGCTTTGCTGCAATGGCAAAGATAAATGTGATGAAGACGGGGGCTGGAGAGATGGTTCAGTGGTTACGAGCACTAGCTGCTCTTCCATAGGTCCTGAGTTCAATTCCCAGCAAACACATGGTGGCTCACAGCCATCTGTAATGGAATCTGATGCCCTCTTCTGGTGTGTCTGAAGACAGCGAGAGTGTACTCATACACAAAATAAACAAATCTTCAAAAAAAAAAAAATGTGATGAAGACACAATACTCTGGGACTAGGTGTGAATGTCCTTGTCCCAAGCTCCTCCCATACAAAGGACCACCCTACTTGTCTCTTCAGGTTGCCCCACCTGTCTCCTTTTAGCCAGACGGATGATTCT…
n283216:4657076	3.85686	2.84331	2.41786	1.71182	2.44621	4657076	423	NONMMUT020409	5092	| AK138199 | mRNAlike lncRNA | Mus musculus | Mouse noncoding transcript | FANTOM3 | A230031I01 | http://fantom3.gsc.riken.jp/db/annotate/main.cgi?masterid=A230031I01 | -1.2685100 | -0.4209627	NOCODE4.0		chr14	38905956	38911047	-	CAAGCAAGTGTGTAGGGATAAAATTTAGGTTAGAATTTGGAAAGGAGTAAGATGTTGTGTAGCAAATGCATGTTTATGAGCACATGGTGCATTTATTTCTTTATTTAGTTTTATTTCTTTATTTATCTTTATTTATTTATATATTTATTTATTTATTTTGGAAGTCATATATTTTGGAAGTCATATAACACATTAACCTCTCTGCTAAAAGCTATACTCCTCAACACACTTGATAGTGCATTTTATGTAATGTAAACTATATTACAGTAGTGTTATAAAATTATTATATTATTTTATATTGTAATATAGCATATATTGCATATTTCTTTACCTTTAAATATTTGTGCATATATGTTATTATTCACAATGGCTTATAATATTTTTCAATCTCTTATAATA…
n283223:4406533	2.15038	4.16708	4.23511	4.33168	1.88299	4406533	119	NONMMUT054700	2063	| AK038536 | mRNAlike lncRNA | Mus musculus | Mouse noncoding transcript | FANTOM3 | A230029A02 | http://fantom3.gsc.riken.jp/db/annotate/main.cgi?masterid=A230029A02 | 1.8330100 | -0.1998792	NOCODE4.0		chr5	131475327	131537970	-	CACAGAGGAAAGTCAACTGAGTTGCTCAATGATGTCTGCAAAGAAGAAGAAGACAGGAGCCTCCAGGGTCTAGCTCCACCACTGTCCCCAGGCTCCATCTATGTTACTACCTTCCTTTT
n283253:5594408	3.99132	2.71135	2.95877	1.59034	3.15646	5594408	430	NONMMUT005188	2116	| AK038516 | mRNAlike lncRNA | Mus musculus | Mouse noncoding transcript | FANTOM3 | A230021N08 | http://fantom3.gsc.riken.jp/db/annotate/main.cgi?masterid=A230021N08 | 0.4079070 | -0.2850126	NOCODE4.0		chr10	32255883	32257997	-	GGACTCTGGTGTTACCTGGTCTTTCTGACTCTGACTGTGGCTTTTCCCTCCTGCAGGACTGTATCTCAGTACTCCTGGGAGACCAGTTTTCTCTGGGAGGAACTTGAATATGGAGAGCTGTAGCACAGGTCAACACTGGGGTGCAGACTGAAACCTGAAGGATCCTGTCCCTGGCTGTCCCTTGGTTCCTTTGTCTTGATGGCTCTGGGCAGGTCCCTCTTGGGTCAGAAATTTGAGCAGAAGTGGTGATTTTACCTGTGCTCACAGGTGTGTCAGCACTCCTGGGAGATTATCTATCTCCTGGTGGTGTTTGGGTATGGAGATCTGTAGCACAGAATCATCTCACAACTACGTCCTTAGTAAAATTGCTTTGTGAGATTCCCACAAAGTTACCTCGAG…
n283277:4913912	4.50433	3.5889	3.14628	1.85192	3.71101	4913912	195	NONMMUT055492	1742	| AK138160 | mRNAlike lncRNA | Mus musculus | Mouse noncoding transcript | FANTOM3 | A230018E09 | http://fantom3.gsc.riken.jp/db/annotate/main.cgi?masterid=A230018E09 | -1.2241800 | -0.3569611	NOCODE4.0		chr5	150568587	150570329	-	GCTGACCAGTAGGTGAAATCCTCTAACAAAACACACAAAAGAGGAGCCTATCATAATAAACACTTGTATATAAATAAATTAGAATTAACCTTTCATTAGAAAATACCTATATACACCAACAGGACACCTTTCCTTTCCAATTGCTAAAGGGTAAATAATGCCAAACATTCATGCTCTTATTCCTCACCCACAGGA
n283305:5031043	4.17068	4.27196	3.91196	1.9843	3.77716	5031043	430	NONMMUT021927	873	| AK038440 | mRNAlike lncRNA | Mus musculus | Mouse noncoding transcript | FANTOM3 | A230011M16 | http://fantom3.gsc.riken.jp/db/annotate/main.cgi?masterid=A230011M16 | -0.8011700 | -0.3625070	NOCODE4.0		chr14	93866334	93867207	-	GTTTTATCAGAATGCATCCAATGTAAGATTTAACCAAAAAAAAAATCTAATTTTAGTATATTTCTAGGATAGTATGTTGTAGATCTCTGAGGGATCTTATAAGTTCAATGTGTGACTGAAAAGAAATTTAGAACATGTTATTAAAATTATAGCAAGGGAAGAATAAGCAGCTGGTAATATTCTATTATAGAAATAGATGAAAGAAGCATTTTTTTTTTTAATTTTCAGGGATAAAGCTGGAAAAAATGCTCTAAGAAACTAAGAACTAAGAGGTTTGCGGAGGATAAACCGGTAATGGGGATAATATTTGAAATGTAAGTAAATAAAATAACCAATAAATAAAAGAAACTAAGAACTAACAATACTATAAAATAGTAAAATAAATTAGAATATATTGTG…
n283327:4732182	4.82698	4.64678	4.47662	2.50237	4.7899	4732182	1798	NONMMUT009364	4470	| AK038406 | mRNAlike lncRNA | Mus musculus | Mouse noncoding transcript | FANTOM3 | A230004M16 | http://fantom3.gsc.riken.jp/db/annotate/main.cgi?masterid=A230004M16 | -1.1719600 | -0.3950236	NOCODE4.0		chr11	41962891	41971111	+	ACGTTCTATTGAGTCCTGGCCTGGCCTTACAGTCCACCTCAATAGTCAGTCTGGACACATTGTCTATTTTTTAAGAGTTGCCCATTCTATCAATTCTTCTTGTAAAGATTGTTTTAATTGGGACAGTTTGAAGTACAATAAAAAATGATGTCAAAATCAATAGCAAAGCTCAGTGCCACTATGCAATTTCTCAGATTCACTGCATTAATTGACAAGGCAATTAGAGTGACTACAGGTGGCAGGGCACAATCTGGGGAGAATATTACTTACAACTGGAGAACTCCAGGGGGCAGGAGTGTTCATCCATTGGGAAGTTGTGTAATTGCAACTGGCACTCAGCATCAATTGTTAGCCTAATTAGAACAACAATAAACATACAGAGAAAAAATGCTAACATCA…
n283343:4525282	5.60947	3.39235	4.60721	3.54112	4.28029	4525282	123	NONMMUT029688	2760	| AK038392 | mRNAlike lncRNA | Mus musculus | Mouse noncoding transcript | FANTOM3 | A230002F15 | http://fantom3.gsc.riken.jp/db/annotate/main.cgi?masterid=A230002F15 | -1.0043000 | -0.3532166	NOCODE4.0		chr17	42508403	42511163	+	AGGATAGCTGTCTCTTCGCAAGTCAATAAACCATGGGCGTGACCACGGAAACCGAGTGCTCCATTTCCTTTCCTTTCCCAGAAGAAATGCCCACAAGTTCCTAATCCTGGTGCAGTGAGATGC
n283446:4778681	2.64274	2.48087	3.42385	5.06511	4.21905	4778681	371	NONMMUT007331	1496	| AK038260 | mRNAlike lncRNA | Mus musculus | Mouse noncoding transcript | FANTOM3 | A130090P07 | http://fantom3.gsc.riken.jp/db/annotate/main.cgi?masterid=A130090P07 | -0.2519180 | -0.3332567	NOCODE4.0		chr10	111235940	111237436	+	TGCGGTTGGCTCTTCTGTAGGACCTGAGTTCAAATCTTAGCATCTATGTCCAGCTGGCTTCTGGCTTCCTTGTGTACTGCTCCCATGCACAAATATCCCTTCCCACACAAGATTATAGTTTTGTAGCACATCATATTTTACTGAGTTTTAAAATCAGATCATATTCATAAAAAACACAGAAGAATGTGGTAGATAACTCCCCATAGTTGATATGATTATTGCACTAGTCATAACTATTTTGACAAAAATGGTCACTTTGGTTGAAGGTAATAGGCTCATTTAGAATTTTAGTATGAGGCTGGCTGGCCCAGTGCCTCAGTGGGTAATGTACTTCATGAACAAATTCGGCAGCCTGATTTTGAGCCTCAAGA
n283446:5443197	1.61368	4.01977	4.23962	4.11854	1.9709	5443197	251	NONMMUT007331	1496	| AK038260 | mRNAlike lncRNA | Mus musculus | Mouse noncoding transcript | FANTOM3 | A130090P07 | http://fantom3.gsc.riken.jp/db/annotate/main.cgi?masterid=A130090P07 | -0.2519180 | -0.3332567	NOCODE4.0		chr10	111235940	111237436	+	CAGACGAGTGCAACTTGAGTCTATAACTCATCTGCATGTCCCCACTAGTAGGACAACCAGAAACCAAGTGACTCCTCACATGCGATGGAACATGTTATAGAACACCTTCCTTATAAAAACTATTGTTCAAAAATGATGAAAATTAATATAATCAAACCTTGACGTTCTCCCATTTATAGGAAATACCAGAAGGTACAGAAACAAATTAAGGGCTGGAGCGATGGCTCAGCGGTTAAGAATTCCGGTTTCTG
n283504:4351039	2.07417	3.3969	4.49083	4.93009	2.80031	4351039	220	NONMMUT035745	2103	| AK038194 | mRNAlike lncRNA | Mus musculus | Mouse noncoding transcript | FANTOM3 | A130085L24 | http://fantom3.gsc.riken.jp/db/annotate/main.cgi?masterid=A130085L24 | 0.2732190 | -0.3348019	NOCODE4.0		chr2	11532595	11534694	-	AAGGCAAGATCTCACGTAGCCCAGCCTGGTCTCTAACTTGCTATGAAGCTAAGACTGGCCTTGAATTCCTGATCTCTTGACTACCTGCTAGGATTATACATATATACGATCATACCCAGATATCCCTAGGGTAATACCAAACCAAAACCCAGGGACCACAGAGCTGATGCAGACCAGCATCTCTCTCCTGACTTTTCAGGGAAGTAGACTCTGTGTTATC
n283789:4344708	4.60099	2.74958	2.36594	1.87286	3.73534	4344708	75	NONMMUT020189	2912	| AK037870 | mRNAlike lncRNA | Mus musculus | Mouse noncoding transcript | FANTOM3 | A130057H05 | http://fantom3.gsc.riken.jp/db/annotate/main.cgi?masterid=A130057H05 | -0.8801940 | -0.2704702	NOCODE4.0		chr14	30011274	30014185	+	CAGGGGAGGTACTAGGGACCCACATCCCACTCTCATTAGACTTGGAGGTGGCTCGGTGCGCAATGGAAGATAGTA
n283917:5124671	2.16409	2.77115	3.69763	4.20709	2.45575	5124671	196	NONMMUT015631	3216	| AK137939 | mRNAlike lncRNA | Mus musculus | Mouse noncoding transcript | FANTOM3 | A130041K14 | http://fantom3.gsc.riken.jp/db/annotate/main.cgi?masterid=A130041K14 | -0.7997780 | -0.2417856	NOCODE4.0		chr12	107975564	107978782	-	GGTACTTGCCGAATTCTTTCTCTGAGGTACCAGTAAGGAATGTCACCCTGGGCCCGGGGTGGGAGCCTGTCTGCACCCAACTTGACAGTCAGTGGTTCTGTACAGCATGAGGTACGCAAGCCTCCCGCCTCTGCCTTTAACCCGTGATGCTGTTTTAGGGGCATGTGAAAAAGTCACTCTCGTGATGGGTCCTGTC
n283967:4353162	2.66541	4.11948	4.4244	5.33309	3.38802	4353162	52	NONMMUT065238	3253	| AK037687 | mRNAlike lncRNA | Mus musculus | Mouse noncoding transcript | FANTOM3 | A130037M21 | http://fantom3.gsc.riken.jp/db/annotate/main.cgi?masterid=A130037M21 | -0.8457120 | -0.3231214	NOCODE4.0		chr8	35478155	35481408	-	GCTGGATTTGTTGAGTGTGCATGTCATGTACTGTAGTCAGGTGAAACACATG
n283992:4712584	5.15629	3.68998	5.37275	2.98899	4.76214	4712584	70	NONMMUT029331	2189	| AK137892 | mRNAlike lncRNA | Mus musculus | Mouse noncoding transcript | FANTOM3 | A130035H13 | http://fantom3.gsc.riken.jp/db/annotate/main.cgi?masterid=A130035H13 | -0.8916990 | -0.2212133	NOCODE4.0		chr17	34632951	34635138	+	GCAGTTCCAAAGACCACAGCTCAGAGAACACCCAGCGTTCTGTTCCCGGTTCACTTTTCATCTTGTCGTC
n284043:4415088	5.02345	3.63743	3.88044	2.58434	4.40659	4415088	188	NONMMUT007967	3659	| AK037621 | mRNAlike lncRNA | Mus musculus | Mouse noncoding transcript | FANTOM3 | A130030B15 | http://fantom3.gsc.riken.jp/db/annotate/main.cgi?masterid=A130030B15 | 1.2863000 | -0.2920747	NOCODE4.0		chr10	122749353	122753009	+	ACATACCAGGTGCTAAAGTTAAAAGAGGATCAGATAGACCATCTAAACAGACCCATAACCCCTAAAGAAATAGAAGTCGTTAATAGTTTCCCAACCAAAAAAGGCCCAGGACCAGATGGGTTTAGTGCAGAATTTTATCATACCTTCAAAGAAGACCTATACTCTTCAAACAATTATCCCAAAGAGAA
n284078:4509107	2.17158	3.02881	2.89664	4.53836	3.51363	4509107	78	NONMMUT055607	2834	| AK037585 | mRNAlike lncRNA | Mus musculus | Mouse noncoding transcript | FANTOM3 | A130027P21 | http://fantom3.gsc.riken.jp/db/annotate/main.cgi?masterid=A130027P21 | -1.2476200 | -0.3704858	NOCODE4.0		chr6	5277500	5280334	-	CTTAGCTATGACCTTTGGAGTGGTCTTAAGGAGGAAGATTGAATCTTGTGGACTGAAAGAATGTGCAATGATTTAGCT
n284167:4675874	3.22896	6.09992	6.64157	6.65001	2.60612	4675874	70	NONMMUT019864	2502	| AK037495 | mRNAlike lncRNA | Mus musculus | Mouse noncoding transcript | FANTOM3 | A130021I08 | http://fantom3.gsc.riken.jp/db/annotate/main.cgi?masterid=A130021I08 | -0.0979388 | -0.3529068	NOCODE4.0		chr14	20566548	20569049	+	CTGCAAGATTGAAATGTCAAGCCAGGTATGACGGCACATGCCTGTTATCCCCATTACTCTGGAGGTGGAA
n284221:4324657	2.7815	4.85782	4.70421	4.87715	2.27458	4324657	90	NONMMUT003816	1624	| AK037426 | mRNAlike lncRNA | Mus musculus | Mouse noncoding transcript | FANTOM3 | A130018A01 | http://fantom3.gsc.riken.jp/db/annotate/main.cgi?masterid=A130018A01 | -0.9576730 | -0.3134091	NOCODE4.0		chr1	171909956	171919356	-	GGACCGAGCCCGATATGTCACAGTCTTGTTAAAAGAAGAATCCTCAGAGATGTGGAGGAGGGACACCCAGAAATTATCCAGCTTTATAGA
n284296:5568450	5.21124	2.37363	2.90832	2.77594	2.9218	5568450	531	NONMMUT068392	2376	| AK037343 | mRNAlike lncRNA | Mus musculus | Mouse noncoding transcript | FANTOM3 | A130008O04 | http://fantom3.gsc.riken.jp/db/annotate/main.cgi?masterid=A130008O04 | -1.5906100 | -0.4130303	NOCODE4.0		chr9	25259455	25261834	+	GGCTTGCATATATTTCTGGTGGACAAAGTGTCCATCTGTCCTGTGTTAGAACCTCACTACTCTCTGAGAAAGTTGTGCTGTCGCTGTTACATAGCTGAATGCTGGTATTCAGAGGTGCTCATTTATTCTTCTTCAGTATTACACAACCCTCTGGAGGCAGTCCTGCGGCTTTCCTGAAGTTTCGGAGTTTGTTTTCCATTTCTTTTAATAGTGTTTATGAGGCAGAGAACCAGAATTTTTGTATCATTGTTGCTACTTTCCTCTGAACTTAATTTTGTACATAGCCTTTTCTGGGGCTACATTCTAGAGAAATAAGCTAATGAATCTTAAATAACCTTTTAGGAGAATCTTATTTTCTTACTGATTATGTTGTCAACTAAGGTATTGTTATCTTTTCTT…
n284303:5476879	5.29176	3.8821	3.21003	2.81855	4.12812	5476879	316	NONMMUT042296	3725	| AK037334 | mRNAlike lncRNA | Mus musculus | Mouse noncoding transcript | FANTOM3 | A130007K15 | http://fantom3.gsc.riken.jp/db/annotate/main.cgi?masterid=A130007K15 | -1.0489800 | -0.3850554	NOCODE4.0		chr3	25854087	25857809	-	GGTCCAATTTGTCTCACCCATAGTTTCATTGGAACATGGTCATACTCCCAGAGAACAGCTCCTTAAAGAAAATGAGTGCTTCCCCACCCCCTCACCAGAAGCCATCAACTATGAAGAGCTTTAGCAACTTTCTCCCATTGTTGAGAAACTGTTCAACAGCAGCTTCCTGTCTGGACTGTTCCTTGGGAGGAGGGAACTGTCACAGAAATATACAATGTCTCTCATTCTCAGTCATGAGTAGAGTACTCTGCACCACTGCAAGAGAAGCTTGCCTGCCAATAGCAGCCAGCTCTGGTAGCTGCAGCATTGGATTGGA
n284350:4815216	2.36453	4.4861	5.16603	4.58245	3.03807	4815216	530	NONMMUT025661	1974	| AK037285 | mRNAlike lncRNA | Mus musculus | Mouse noncoding transcript | FANTOM3 | A130003H23 | http://fantom3.gsc.riken.jp/db/annotate/main.cgi?masterid=A130003H23 | 0.0101947 | -0.2197380	NOCODE4.0		chr16	16930543	16932513	+	TGGCCATCCCATTGCTGTTAGACTATATTTTATGGGATGCAACATAACCTGCTGCTGTTGGGTCTGGGGCAGTGGGGACAGGGTTTCCGGGGCTGCAGAGTGGCAGAACCAGGCAAGAGGCAAATAGAGTCTGTTTTTTTTTTTTTTTAATTTGTCCTTTCACAATTTCACTCATGTACACAATGCATACCCTCCTACAACCCACCCTCTCACATCTCCCTACAACCTATAAACCATTCCTCTCCCCTACAAATATCTTTTCGCTGACTAGTGGGCTGATGCCTACCCTGTCCCCAGCACTCCCTGCCCCCAGGGGACACAGCTGCCCACTAGGCAACAAGCCCAGAAGAAGATAGTGCCAGCATGCAAATCTGGGGGTTTCTGATCAGGCCCTGCCCC…
n284412:5580243	6.15938	5.98192	5.14163	4.10065	5.6406	5580243	115	NONMMUT019004	2958	| AK137742 | mRNAlike lncRNA | Mus musculus | Mouse noncoding transcript | FANTOM3 | A030006E17 | http://fantom3.gsc.riken.jp/db/annotate/main.cgi?masterid=A030006E17 | 0.2366770 | -0.2179104	NOCODE4.0		chr13	104030528	104033486	-	TCTGAGCAGCAGTTCATACCCTGGCAAGCTGCACTGCAGAGGGCTCCTGCTCACGGGAAACCAAACCCAGCCGAGTCCGATGTCAGCCTGCAGCCTCTGAGTACGGAGCAGCAGT
n284425:5264654	5.83634	3.02079	3.63958	3.63897	4.17372	5264654	1222	NONMMUT061200	1536	| AK037147 | mRNAlike lncRNA | Mus musculus | Mouse noncoding transcript | FANTOM3 | A030001D20 | http://fantom3.gsc.riken.jp/db/annotate/main.cgi?masterid=A030001D20 | -1.2626700 | -0.2480874	NOCODE4.0		chr7	45635679	45638758	-	GGCCCGTCATGGTGTCTAAGTCATCTCACGGGCTGGAGATGACTCGGGGTCACAGAGAGGCTGAGTACACAGAGCCGGGATAGAGATTCAAAAGTCAAAGTCATACAAAGCCGACCAAGAGTCACCTTGAGCAGGGAGGTGCGGGGCACACATAGCAGGTTCACAGCAATGGAAAGTTTCCGGAAGAACTCAGTGGCAATGTCACCCAGCCCGGCCCCCTGAAGCCAATCCAACACAAGATCCAAGTTGGTTCTGATTTGGACGGCTCGAGACCATTGATAGAAAGGTCGGCCTTGACCTGTGTAGGAAGAAATGAGAGGCGTTGAATGAAGCTACTTCCCAGGCAAAGCCACCCAACGCTGAAGCCTGAAGCCTGGCTTATGTCTGCCTGGATTAGGT…
n284482:4688863	5.54667	3.43307	2.89615	2.88027	3.68711	4688863	286	NONMMUT017329	1871	| AK037054 | mRNAlike lncRNA | Mus musculus | Mouse noncoding transcript | FANTOM3 | 9930104M19 | http://fantom3.gsc.riken.jp/db/annotate/main.cgi?masterid=9930104M19 | -1.1282100 | -0.2459343	NOCODE4.0		chr13	45939168	45941038	-	CCTGGATTAAGTGAGGCCGAGTCTCAAAACAACATCAAAGTAATGGAGGAAGAAGAATAAAATATTCTTGAAATAAGAAAGAAACACACACACACACAAATGGAAGAGCAAACTAACACAAAGCAAAGAATGGAAATGAAATGTAAGACACACAACCCAGAGCCTGGGAATTAGAATACGGAGAAAAACCCGGCTGACATGATTGCTGCAGGATCTTGGTCAACAACCCTGAATGTTCTAAGCTTTCCTTTTTCTAAGTCCTCAACCTCCGTGAGAAGCCCGAGTC
n284605:4397110	3.44261	3.59752	4.84969	5.56117	5.59416	4397110	739	n284605	3667	| AK036840 | mRNAlike lncRNA | Mus musculus | Mouse noncoding transcript | FANTOM3 | 9930017F19 | http://fantom3.gsc.riken.jp/db/annotate/main.cgi?masterid=9930017F19 | 7.3620000 | -0.2309158	NOCODE3.0		chr17	33582602	33607764	+	TGTCAGGGCCAGTGATAATCACACTACTAACAAACATATAACACTTAGTGGAGCCAGATATGGTAACACACACCAGCACTCATGAGCCTGAGGCAGGAAGATTATGAATTGAAGGCCAGTTTAAGCTGCATAGAATGACCCTATGGTTTTCCATTTATTTGTTTGCTTATTATTTTGAGATAGGATCTCCCAACCTGGAGTTTTCTATGTAAGTCAGGTTGCCCTCAAACATACAGACATCGGCCCACCTCTGCCTCCTGATTTCTGGGAATAAAAGTGTGTACTACTGTGCCTACTATAAGTAGAGGTCTGGGGCAAGACCTCAGTTGATAAAGTGCTTGTTTTTCAAGCATGAGTATGTGAGTTCTGTCAACAGAACCCATATTTTAATTTTTATCA…
n284608:5038704	5.87138	5.20372	4.42352	2.82866	5.14135	5038704	836	NONMMUT056428	3495	| AK036830 | mRNAlike lncRNA | Mus musculus | Mouse noncoding transcript | FANTOM3 | 9930016K08 | http://fantom3.gsc.riken.jp/db/annotate/main.cgi?masterid=9930016K08 | 0.4729780 | -0.2861226	NOCODE4.0		chr6	38015119	38018611	-	TTCGTCTAGAGTGGTGGCATATACCTTTAATCCCAATGCTCAGGAGGTAGAGGCCAGAAGACTTATGTGAGTTCTAGGCCAGCCTGATCTACATAGTGAGTTCCAGGCTAGTCAGGGCTTTATAAGTAGTGAGACCTGGTCTCATACAAAAAAGTCCAGTTTTTGAGATCATAATATGAATCCCTTTCCTTCTCATGAACTCCACTCTCAAATTCATAGCCTCTGTTTTTGGTTTGGTTTGGTTTGTTTATTTATTTATTTACAGCAAACTTTCTCTCCTCCCCTCTCCCCCCAGCTCTTACAATCTTTCTGTCCCTCTTCCACAATGTTCCCTGAACTTTACATGCAGGAGTGTTTTGAAGATGGGACTAGGCTCCACAACTCTGGAGTTTGATTGGT…
n284657:5122581	1.93913	2.66929	4.53575	6.19952	4.72016	5122581	272	NONMMUT073256	3256	| AK036748 | mRNAlike lncRNA | Mus musculus | Mouse noncoding transcript | FANTOM3 | 9830169G21 | http://fantom3.gsc.riken.jp/db/annotate/main.cgi?masterid=9830169G21 | 1.4792300 | -0.3560966	NOCODE4.0		chrX	96239965	96243636	+	CTGCTTTAGGAGGACTGAGATACCAAGAAATAATGGGTATCCTGCAACTGAGGCAGGTGACTCTCCTTATATTGAAAAAAATCTGGATATTAAGACATGGTCCTGAGTACTTCTTTATCACCAAATATATTTTCTGATATGTGGCTTATTCTGGACATTTATAGATTTTTGGTAAAATCTTATACCTCTTTTACCAAGCTTATGCCTTTCAATTTGCGTCATGAAGACTGACTATGTAGTCATCTATGTCTTCATTCTTATGGGTCTGACTA
n284806:5584299	1.34113	3.15644	2.2262	3.45174	1.79235	5584299	468	NONMMUT071759	2195	| AK137490 | mRNAlike lncRNA | Mus musculus | Mouse noncoding transcript | FANTOM3 | 9830113N01 | http://fantom3.gsc.riken.jp/db/annotate/main.cgi?masterid=9830113N01 | -0.2735110 | -0.2622969	NOCODE4.0		chrX	8078145	8080340	-	ACTTGCTTATGGTCAAGGTGTTTTGTTGCAGCAATAGAAACCCTAAGTAGGACAGATCTATTCCTCAATTACTCTTTATTTTGTAAGATATTTTCTTGGTTTGTTTGTTTTGTTATTTTTTTTAAAGATTTATTTATTATTTTTTAAAAGATTTATTTATTTATTTATTTTATATGAGTACACTGTAGCTGCCTTCAGACACACTAGAAGAGGGCATTGGATCCCATTACAGATGGCTGTGAGCCACCATGTGGTTACTGGGAACTGAACTCAAGACTTTTGAAAGAACAGTCAGTGCCCTTAACCTCCAGCCCTTATTTATTTATTTTTATGTATGTGAGTACACTGTAGCTGTACAGATGATTGTGAACCTTCATGTGGTTGTTGGGAATTGAATTT…
n284829:4730552	2.9436	4.2584	4.12613	5.46864	5.41209	4730552	84	NONMMUT026929	3918	| AK036420 | mRNAlike lncRNA | Mus musculus | Mouse noncoding transcript | FANTOM3 | 9830104H24 | http://fantom3.gsc.riken.jp/db/annotate/main.cgi?masterid=9830104H24 | -1.0347700 | -0.3320461	NOCODE4.0		chr16	52440514	52444432	-	CATCCTGAAGTGACTGGACACAATAGAGCAGTCGGAATTGATGATAAAATAGTCCTGCACAGAAAGCTTATTCAATCCTGTTCC
n284836:4475041	1.35504	3.35626	4.02245	3.81595	2.08446	4475041	99	NONMMUT013262	1263	| AK137464 | mRNAlike lncRNA | Mus musculus | Mouse noncoding transcript | FANTOM3 | 9830006A05 | http://fantom3.gsc.riken.jp/db/annotate/main.cgi?masterid=9830006A05 | -0.1193430 | -0.3621610	NOCODE4.0		chr12	4222101	4223361	-	GAGCACCTTACCAGGGTCTACGTTCTCTCAGTCATTGTGAATAATCCTTAGGAGGGTTAGGAACCCGTGAGCCCTTTTCCTTCCATTATATGATAGTTC
n284881:4609467	3.53973	5.73562	4.95993	6.24577	4.91463	4609467	174	NONMMUT069085	3166	| AK036323 | mRNAlike lncRNA | Mus musculus | Mouse noncoding transcript | FANTOM3 | 9630056M11 | http://fantom3.gsc.riken.jp/db/annotate/main.cgi?masterid=9630056M11 | -0.2429400 | -0.3191281	NOCODE4.0		chr9	50927448	50930613	-	CAAGGGTGTAACTATGTCCCAAGTAGGACAGGAACATAAGGAGGGACCATCAGTCACTCTGAGAAGCCAGGGAAGCATCACCAATCAGGAAGTGTTTGAGCTCATTCTTCATGGGGTCAATACTGCTGATATAGCAAAACTTAAATATTTGGTGCTGGCAAGAATCTCTAGTGA
n284914:5300735	5.67334	4.73664	4.316	3.12564	4.99405	5300735	416	NONMMUT057237	3666	| AK137420 | mRNAlike lncRNA | Mus musculus | Mouse noncoding transcript | FANTOM3 | 9630053C23 | http://fantom3.gsc.riken.jp/db/annotate/main.cgi?masterid=9630053C23 | -1.5906100 | -0.3555869	NOCODE4.0		chr6	63763855	63767518	+	GCGAATCTGGGTGTCATTACTGGTAGGAAAAGAAAAAAAATTAAATGAAGCCTTTGTAGTCCTGTTGCTCTGTCAGTGTTTGTAAACACACACCATCATCTTAAACTGTGGGAAACAAAACACGCAAAAAAATGATGAATCTCTTATGATCACATACACGTGGATTATAATAACTCTGCGCATGACACACATAGTCTATGAGGGATTAGGATGTGAAACAATGTCTGTACAAAGTAATGTACTGTTTAGCTTAGGAAGAGACTTACCAATGCAGCTATGAGCAGAATACCTCTTCAGTTTCTTATATACTTCATCAAAAAATCTTATAAATTTAAAGGATAAAATATCTAGTTTACTTATATAAATACAAGACAAGATCTGGGCAACACTTGTGTCCTC…
n284941:5556337	5.31805	4.37442	3.8659	3.08999	4.60666	5556337	384	NONMMUT021919	3895	| AK137405 | mRNAlike lncRNA | Mus musculus | Mouse noncoding transcript | FANTOM3 | 9630047D11 | http://fantom3.gsc.riken.jp/db/annotate/main.cgi?masterid=9630047D11 | -1.2889000 | -0.4538985	NOCODE4.0		chr14	93723294	93727188	-	TTAGTCACGGTTACACAAAGCTCTGACTTGTACCTTGACATTGTGACTCCAAATGGGTTGCCTCTTACTAAGAGCAAGGAAGTAGAAGTATTATTTACATTTTACACTGAAGACACACCACACTTCTATTTACTAAAAGTGCTTATATTCTGCAATATTGAGCATCTGTCCATTTCTAGTTGGGATATTTAATTATTTACTGTGCATTTTATTGGGATCAGGAAATCAAACAGAGTGATACAAAAATAACCCGTAAATGGACAGTTATAGATGCTATCTTCCCCACTGGCTGAATAAACTAGATGTAGCAAATGTATCCGGAAATAATGAGTTTTATCAATTAACCCTTCAATGCTGCTTTCTGTGTGCCATCCATTCTTCTGA
n284989:5601943	5.37816	4.32112	4.05925	3.18245	4.90222	5601943	698	NONMMUT037072	2544	| AK079359 | mRNAlike lncRNA | Mus musculus | Mouse noncoding transcript | FANTOM3 | 9630042G05 | http://fantom3.gsc.riken.jp/db/annotate/main.cgi?masterid=9630042G05 | -1.5906100 | -0.3986788	NOCODE4.0		chr2	42321694	42653256	-	TGTCAATTGCTTTCACGGATCACTGCACTTCTAGTTGATTCTATTTTTATTTCTTTTTAAACATTACCAGAGAAATGGGAAGCCTTTTGTTTCTGACTTCTTTAAAGTGGGTATGTGAAGGGGAGAGTGAAGTGCAGTTGTAGAGTATGAAGTAACTTATAAAAGGGAAAGGATGCAAGGTTAATGCTTACATTGCAATTTGGGCTGATATTAGGAAATTTATTTGAACTGAATGAGAAATACAGCATAGCAACACAGGGTCTTTCCTCCAATTTGACTTGCACAGGTTTTGAGAAAAAGCCTCATGTAGAAGGATCATTAAGCAAATCAACCCGTAGCTTACATATCATTTATATTAACCCTTAGAAGTTCACAACTGCAGAACATAATTTCTTTAGA…
n285054:4847419	3.28401	1.73634	1.62407	1.24159	2.98031	4847419	558	NONMMUT014960	2130	| AK036065 | mRNAlike lncRNA | Mus musculus | Mouse noncoding transcript | FANTOM3 | 9630032A21 | http://fantom3.gsc.riken.jp/db/annotate/main.cgi?masterid=9630032A21 | -1.0027900 | -0.3346034	NOCODE4.0		chr12	83395872	83398001	-	TGCCAGGCATGGACTATACCCACTGACCTATACCACCAGACCAAAAAGTAGACTTTAACATTAAGTATTAGTAACCTAATCTAAAAGTGTTCCTTAGTATTAACAAAGTATCTCAGGGCTAGCAAGATGGCTCAGTGGGTAAAGGCGCTTGCTGCCAACCTGAGTTGGCTCCCTAGAATTCATGGTGGATGGAGAGAAGCCACTTAGGCATGTTGTCTTCTGACTTCCATGTGCATAAACATAAAAAAAAAGTAAAAAAAAAAAAAAGACCTATAAACAACCAAAGTGTCTCAATAGAATTTTGCAATGTAGCCTAATTCCTGCCTTCCAAAGTACACGCTATTCTTTAATTTACATCATTATTGATGCCATGAAGATTCATGAGATACTTATGTAACT…
n285108:4966401	5.22454	4.46073	3.92563	3.20882	3.76384	4966401	272	NONMMUT019465	1798	| AK035976 | mRNAlike lncRNA | Mus musculus | Mouse noncoding transcript | FANTOM3 | 9630023E18 | http://fantom3.gsc.riken.jp/db/annotate/main.cgi?masterid=9630023E18 | -1.1041200 | -0.4080258	NOCODE4.0		chr13	117940539	117942321	+	ATGTGTGCATTCTCCTGATTGTGTTTACCTAAACGTGGTAGCACTGAAACACAGCCTAAGTCAATGTGCACAGTCGAGGATGGGCTGTGTGGAAGGAATAAGTAATCTTAAAGGATTTTCAACTGAAATACAGCTTCAATCTTTTAAATTATATTCACTTCACTACATGCACATATAAACACACACACAAATATATATGAACTGATATTCTAGAGTTTTATGAAATCAATATTCTCTAAATAACTAGTCTTAAGGTTCCAGGTGTGATGCTA
n285209:5206702	2.81246	3.52711	4.67745	5.01556	2.89525	5206702	439	NONMMUT027610	3219	| AK035820 | mRNAlike lncRNA | Mus musculus | Mouse noncoding transcript | FANTOM3 | 9630008B05 | http://fantom3.gsc.riken.jp/db/annotate/main.cgi?masterid=9630008B05 | -1.0189900 | -0.3065617	NOCODE4.0		chr16	89899158	89902378	-	AGAGCGCAAGTAGGCCCTTAAGATAGGCCAGGAAAGCCCAAATACCGCTGGGATTTTAGTATTAAAAGCTATACTCCCTCCAGTTACCTCCTGGATGCAAAGCTGTCTAGATCCAAGTGAGCGTGCCCCTGAAAATGAAGAAGGAATCAGTGTTGGTTTCCCAGCTGGGAGGCAGACACAGCTCTCATAGCTTGTCACCAAATGCTAGGGACTGGAAGTGGCTGAGAGTTCACATTTAAGATACCTGAGATAGTTTGGGGAGGGGACCCAAGTGTAAATGCATAATTCCTTTATATTTCATATACATCTCCCACATAGGCTGAAGCTGGCTTCACCTGATATCTTTAAGGCATCTGTGTTTTTCATACAACCTGTTGTGTTGAGGGGAAGTTGAGTGTT…
n285269:5166395	3.32304	3.3108	3.33154	5.52595	3.75112	5166395	456	NONMMUT069561	1594	| AK137293 | mRNAlike lncRNA | Mus musculus | Mouse noncoding transcript | FANTOM3 | 9530098G20 | http://fantom3.gsc.riken.jp/db/annotate/main.cgi?masterid=9530098G20 | -0.9752870 | -0.2566411	NOCODE4.0		chr9	64347609	64349195	-	GTTCAGGATCCTGGTCAAGTATTCCTTGTTTTCTTTCCCATTTCTCCTTAAACTTTGTTGTATTTCTATTGATTTCAGAACTCTTAGTCTATTGACACAGATGTAAAATGGGATTTGCCCACCCCCAACTCAGATCTGTGCAGTAACAAAGCAGAGTAAACAGGAAAGCTCTGTGTGATGAATTTATCCAGCGGGAAAAAAAATATTTATCAAGACCTGCTGAAACATCCCTACAAGATGGACAAAAACTTAATCTCATCAAAGAAAATCAATCAAAAAAATTAAACCACAAGAGCAATGTTTCTATTTTTGAATTGTAATTGGCGAGCCAGATGACTGAATTTTCTTCTACTCCGCCTCAAGACTCAGGAATTTATTTTCTTTTTTTGGTGTTAATCA…
n285424:4309548	3.25761	3.61943	4.51306	5.49567	4.53412	4309548	54	NONMMUT005432	541	| AK035573 | mRNAlike lncRNA | Mus musculus | Mouse noncoding transcript | FANTOM3 | 9530068M01 | http://fantom3.gsc.riken.jp/db/annotate/main.cgi?masterid=9530068M01 | -0.0989291 | -0.1684125	NOCODE4.0		chr10	42740538	42758660	-	AGGTGGAGGCTAGTAGATCTCTGAGTTTCAGGACAGTCTGATCTAAAAGCAAGT
n285475:5221729	2.33365	3.63786	3.86468	5.11881	2.57946	5221729	473	NONMMUT074111	2476	| AK035510 | mRNAlike lncRNA | Mus musculus | Mouse noncoding transcript | FANTOM3 | 9530058H24 | http://fantom3.gsc.riken.jp/db/annotate/main.cgi?masterid=9530058H24 | -0.7420580 | -0.3343950	NOCODE4.0		chrX	141316304	141318780	-	GGCCACATATTTGGTGAGCAACATTTGTTTTTCTTAAAAACCTATTTAGGCACTCTGTGAACTAAAATATGTTCCCAAACCTGTCTAGCCACATAGATACTAATATTACTCTCCCAAGCCACAGAGGTACCCAAAAGAACTCAGGAAAAAGTAGAGGGAAGCTAAGCAGTGGGAAATCCCACAGAGGCTCAAAGTACCTAACATGGGCTGCTTTTTGAAGCATGTGACAGGGAGTTGAGTGACCTAGTAAAATTTATTATCAAAAACGCAGAAGTTGTGGCTCTAGTTACTTGTCCAGAATAATTTAACTTCTTCCTGAGTTTCATGCTTTAAATAAAATTTAAAGAAGATTGAGCTCCAATAACAGAAGGATCTTCCCAGCTCCACTCCTCTAAGGAT…
n285506:5475503	4.57562	2.35097	2.06084	1.49796	2.51276	5475503	221	NONMMUT056384	2317	| AK035469 | mRNAlike lncRNA | Mus musculus | Mouse noncoding transcript | FANTOM3 | 9530052J19 | http://fantom3.gsc.riken.jp/db/annotate/main.cgi?masterid=9530052J19 | -0.1527190 | -0.3869883	NOCODE4.0		chr6	36445274	36447585	+	GTCCCTGATGCTGAAACACTTGCCCACTATTTACTGATCTCTTATCTCCTGGTGTTGATAGACAAGGATTCATATATCATGAGCACCAGTTCCACATTTTCACTCAAACCAAGTAACTCCAAATTCTCAGTGCAAAACAAAACCATAAAAATCCAAGAAAACATGCCTCCTCCAAAAATTAATAATTCCATAATAATTGGCCCAATGAGAATGACCTCTCT
n285608:4485041	1.38727	2.91547	2.49209	3.50831	2.08603	4485041	452	n285608	3636	| AK035402 | mRNAlike lncRNA | Mus musculus | Mouse noncoding transcript | FANTOM3 | 9530031O10 | http://fantom3.gsc.riken.jp/db/annotate/main.cgi?masterid=9530031O10 | 1.2970700 | -0.3284714	NOCODE3.0		chr10	24668485	24674258	-	CCGTAGGAATTTCGGCAAACTGTTGCAGGCGACTGTTGACTGTCTCATATGTATGTATGACTACGCAGTTTACTCTAGAGATAGATTTGGGTTGTACCAAGGCTCTTTTTTTCCCTCAGCCTGAGACTTTTCTCCTGAAGTTCTAGTTGTTTGGCATGGTAGTTTTTTTTCTTATTATTTACCTTTATATGCTTATGGTGCATAGTGTTATAATTTGATGTGGGTGCATGCTGCATAATTATCACATTATTGTGCTTTATATTTTCATCTTAGATATTTAATTTTTTAAAATAATATGAAGTAATACTAAGGGGATTTAAATGTTAATTACCATGATCTGATAGCATACCTCATATACAGGGTTATTGTAGCCTAACTGTTGGAACTTGAAATTCCTGT…
[truncated: 682 more rows]
