# Supplementary material for: Aberrant LncRNA Expression Profile in a Contusion Spinal Cord Injury Mouse Model
Source: Biomed Res Int. 2016 Sep 4;2016:9249401. doi: 10.1155/2016/9249401 (PMC5027055; doi:10.1155/2016/9249401)
Supplement: Supplementary file 1 — S1 license pdf: The License Awarded by Soochow University. Table S1: Differential Expression of LncRNAs and Annotation. Table S2: Differential Expression of mRNAs and Annotation. Table S3: mRNAs STC Increase or Decrease. Table S4: LncRNAs STC Increase or Decrease. Table S5: The Significant GO Terms for Differentially Expressed. Table S6: The Significant Pathways of Differentially Expressed Genes. Table S7: The Quantity of the mRNA and LncRNA Network. S1 Fig: The dynamic network between LncRNAs and mRNAs. In this map, the circles with a green line represented LncRNAs, and the other circles represented mRNA. The lines between circles indicated regulation between these genes. The size of the circles indicated the ability of interaction between the genes. This ability was quantified by the degree, which was defined as the connective number between genes. The color was in accordance with the results of the clustering analysis, which was defined as the K-core. The same K-core indicated the similarity and correlation of function between genes. The red color representing the maximal K-core indicated the strongest regulation level in this network. [file 9249401.f1.zip › S2 Table.xls]

## Sheet: The description of sheet 1
The name of table	Header	The description of header
Differential expression of mRNAs and annotation	Probe Set ID	mRNA ID at microarray
	Gene Symbol	The gene name of corresponding probe ID
	Gene description	The description of gene
	xiaoshujisuiRNA-od_(MoEx-1_0-st-v1).rma-gene-core-Signal	Signal value of control group by log2 transformation
	xiaoshujisuiRNA-1d_(MoEx-1_0-st-v1).rma-gene-core-Signal	Signal value of 1 day post-injured group by log2 transformation
	xiaoshujisuiRNA-3d_(MoEx-1_0-st-v1).rma-gene-core-Signal	Signal value of 3 days post-injured group by log2 transformation
	xiaoshujisuiRNA-1w_(MoEx-1_0-st-v1).rma-gene-core-Signal	Signal value of 1 week post-injured group by log2 transformation
	xiaoshujisuiRNA-3w_(MoEx-1_0-st-v1).rma-gene-core-Signal	Signal value of 3 weeks post-injured group by log2 transformation
	mRNA Accession	The accession number of mRNA corresponding differential probe in Genebank
	mRNA Source	The source database of mRNA
	mRNA Description	The description of mRNA
	chromosome	The name of chromosome corresponding mRNA
	strand	Positive-sense strand and negative-sense strand
	start	Start point
	Stop	End point
	GO Biological Process ID\Term\Evidence	Biological process in the GO including GO ID, name and evidence
	GO Cellular Component ID\Term\Evidence	Cellular Component in the GO including GO ID, name and evidence
	GO Molecular Function ID\Term\Evidence	Molecular function in the GO including GO ID, name and evidence
	Pathway Source	The source of pathway
	Pathway Name	The pathway name corresponding differential expression mRNA

## Sheet: sheet 1
Probe Set ID	Gene Symbol	xiaoshujisuiRNA-od_(MoEx-1_0-st-v1).rma-gene-core-Signal	xiaoshujisuiRNA-1d_(MoEx-1_0-st-v1).rma-gene-core-Signal	xiaoshujisuiRNA-3d_(MoEx-1_0-st-v1).rma-gene-core-Signal	xiaoshujisuiRNA-1w_(MoEx-1_0-st-v1).rma-gene-core-Signal	xiaoshujisuiRNA-3w_(MoEx-1_0-st-v1).rma-gene-core-Signal
6748174	B3gat2	5.88919	4.5397	4.47719	4.12725	5.2631
6748884	Il1r1	3.93536	6.25424	6.25424	6.9066	6.39762
6749736	Casp8	6.01776	7.57171	8.59091	9.47881	8.06617
6750519	Cxcr2	3.28774	6.508	5.58804	5.37562	4.3664
6750625	Des	4.00709	6.38908	6.98161	5.60202	4.2465
6750848	Sgpp2	8.25389	6.76853	5.59519	5.06576	6.76853
6751620	Olfr1410	4.84121	2.95876	3.87074	3.68107	3.58514
6752026	Cdh20	7.78909	6.28917	6.68565	6.56452	6.96114
6753397	Tnni1	3.8678	5.47101	4.22653	3.92095	3.74906
6753700	B3galt2	7.2965	5.39832	5.18927	4.95423	6.70008
6753917	Ptgs2	2.87189	5.6458	5.08792	6.38458	6.53806
6755055	Rgs5	6.27089	4.88938	6.23139	7.11175	6.55373
6755146	Fcgr4	2.84332	5.07581	5.95399	8.4244	5.31634
6755197	Cd48	3.13398	4.51061	5.78583	7.68058	6.26175
6755242	Ccdc19	6.19839	8.68122	9.06903	9.80627	8.58132
6756637	Rgs20	5.6974	7.3086	6.31133	5.69189	5.72655
6757282	Mcm3	3.73431	5.0907	5.83906	6.2455	5.03068
6757927	Ankrd23	4.74472	6.60165	5.46693	4.83764	4.43116
6758435	Slc40a1	5.35102	3.54486	4.76093	6.32234	6.19234
6759466	Myl1	3.12694	7.99067	6.33897	4.30527	2.7099
6759621	Fn1	6.62672	8.61754	9.74798	10.6767	10.3686
6760232	Slc19a3	4.79425	3.17697	3.63629	3.5656	4.36635
6762328	Prelp	6.82393	5.48017	6.05172	7.93564	9.59547
6762796	Rgs1	2.17188	4.814	5.28406	7.77597	5.65695
6762967	Prg4	3.83189	5.774	7.54425	7.05796	9.3463
6763062	1700025G04Rik	5.59251	4.26319	4.01289	4.21324	4.26319
6763146	Npl	5.33586	6.79338	8.29878	9.00399	7.58542
6764038	Fcgr2b	4.34051	7.51444	8.45979	9.53467	7.85836
6764040	Fcgr3	4.9216	6.66851	7.64683	9.1126	7.61635
6764049	Fcer1g	7.87927	9.49576	10.9031	11.7379	10.8538
6764134	Casq1	4.03685	7.12772	5.41008	4.3692	4.26139
6764246	Ifi204	2.36088	5.5007	5.80978	6.11362	5.35262
6764289	Ifi202b	2.48642	5.71401	5.46621	4.82	4.12896
6765218	Atf3	3.33741	8.38756	8.25414	8.29885	7.15261
6766455	Sgk1	5.73351	7.26068	7.44224	7.8129	7.0373
6767057	Trdn	2.16176	5.02443	3.49646	2.3073	1.98569
6767782	Lilrb4	2.96577	9.50919	10.7957	10.7752	9.8106
6769255	Gadd45b	5.72058	8.84488	8.08949	6.85352	6.59995
6769878	Hal	3.64296	6.42677	8.66707	9.35975	6.98973
6771703	Mmp19	4.00586	6.24707	6.24707	6.95008	6.24707
6771723	Olfr763	2.46053	3.92265	3.63417	4.20497	2.43635
6771729	Olfr776	1.78126	4.28591	3.2667	3.45977	1.81515
6772550	Pde7b	7.63579	6.07841	6.50934	7.4212	8.34168
6772802	Enpp1	7.17542	5.61986	7.01326	8.77009	7.57253
6772815	Arg1	3.83514	8.02982	9.60921	8.31775	3.81337
6774400	Srgn	8.51718	10.5774	10.7712	10.8608	10.2474
6774404	Ddx21	5.69947	7.24918	6.92473	6.80052	6.38218
6775136	AI646023	6.32083	4.57913	5.07292	5.29197	5.98172
6775146	Susd2	8.04623	6.55818	5.75502	5.76593	7.42307
6775413	Diras1	7.01997	5.21054	5.08061	4.19815	4.96249
6775854	Mybpc1	3.80213	6.09116	6.13991	5.11464	4.27755
6776185	Socs2	6.05408	7.78908	6.88586	7.37799	7.43768
6777190	Lgr5	6.30934	4.90951	4.37393	4.6684	4.94335
6777309	Lyz2	4.66974	7.34702	10.6615	11.9011	11.1934
6780331	Gabrb2	6.81942	5.27923	4.6508	4.04323	5.54725
6780332	Gabrb2	7.54888	5.41644	5.43361	3.26329	6.27061
6780551	Havcr2	4.60538	5.94925	8.22296	9.31594	7.64637
6781840	Myh2	3.59232	6.46123	6.23313	4.31	4.11235
6781846	Myh4	1.9892	6.28212	4.56633	2.97841	1.96502
6782141	Eno3	5.29557	8.40437	6.55726	5.94307	5.43614
6782422	Rtn4rl1	5.61731	4.08284	4.01685	4.68623	5.53258
6782679	Tlcd1	8.11595	6.51642	5.96162	5.90128	6.7233
6782702	Vtn	8.18018	6.52899	6.91862	8.5287	10.3585
6782915	Ccl2	4.47796	8.10057	8.61121	7.01372	5.33441
6782916	Ccl7	4.62326	7.818	7.85086	6.67595	5.56223
6782917	Ccl11	4.74142	7.79185	6.84397	7.13846	6.90304
6782918	Ccl12	3.61491	7.01566	7.14595	5.29534	4.7528
6782988	Slfn2	2.89752	6.21355	7.08534	7.69693	5.58716
6783035	Ccl4	3.21478	5.37857	4.20103	4.28097	4.28097
6783040	Gm11428	2.39978	6.23914	8.45608	9.34708	6.69565
6783144	Car4	6.47243	5.12405	5.13575	3.84688	5.13575
6784003	Tcap	3.47687	5.92412	4.37796	3.79903	3.81251
6784280	Tmem106a	4.1667	5.69593	6.85898	8.57757	7.01247
6785283	Tnrc6c	6.67621	4.86585	5.06428	6.63324	6.69404
6785508	Slc16a3	4.14476	5.97013	6.39922	6.56201	4.53954
6785865	Igfbp3	5.66999	7.93792	8.32294	7.92721	7.16728
6786249	Plek	6.30627	9.17282	10.4808	10.9974	9.43867
6787174	Fgf18	7.41488	5.65014	5.4342	6.08847	6.22444
6787896	Irgm1	4.58003	7.08017	6.5691	6.49196	5.77002
6789325	Cd68	5.51212	8.10627	9.89598	11.0108	10.155
6789344	Fgf11	7.10591	5.5007	5.01667	4.38749	5.60463
6789597	Aspa	8.23482	6.57016	6.86499	6.75901	7.70577
6790290	Ccl6	3.91324	8.12511	8.47946	8.44527	7.06217
6790291	Ccl9	4.73916	8.5026	9.24016	8.99774	7.09445
6790294	Ccl3	4.49654	9.67345	8.98221	9.1174	8.35581
6790670	Nog	3.48882	1.68685	2.66189	3.25176	2.96138
6791015	Pdk2	8.61461	7.14118	7.45721	7.09051	8.11302
6791347	Krtap1-5	2.41438	4.19148	2.11593	1.59034	2.23861
6792122	Abca9	4.70385	3.33733	4.51117	5.92096	7.07842
6792614	Socs3	5.00406	7.05649	6.71769	6.45751	6.0284
6794568	Dgkb	8.10092	6.66027	5.83742	5.28463	7.1306
6796121	Rhoj	5.4582	8.27819	7.93843	8.34112	7.56261
6796691	Fos	4.96884	7.1358	6.75618	6.66025	6.07504
6797196	Gpr65	3.84694	5.18612	6.29495	7.94557	6.81186
6797579	Serpina3n	9.32811	11.6263	11.6201	11.0689	11.1567
6797742	Bdkrb2	4.43608	5.76112	4.64792	4.00805	4.5698
6798314	Crip1	4.58502	6.6025	7.32867	9.28019	7.66661
6798418	Rapgef5	8.18153	6.84268	6.88309	6.39656	7.41826
6798634	Fkbp1b	7.03481	5.66631	5.18315	5.59059	5.48855
6800233	Ifrd1	6.24287	8.03191	7.05276	6.8231	6.54701
6803210	Ifi27l2a	3.59674	5.2248	5.90495	6.49579	5.48595
6803319	Clmn	6.95372	5.62313	4.97922	5.34707	6.57873
6804582	Klf6	6.30214	8.22902	7.99852	7.988	7.58916
6805058	2810021B07Rik	4.93738	3.42943	4.8918	5.42147	4.8918
6805380	Hist1h2bb	3.51973	1.91145	6.7589	7.36728	4.19752
6806435	Gcnt2	4.13532	6.02073	5.78021	5.76048	5.47904
6806566	Edn1	4.10524	5.44367	4.94468	4.24977	4.54606
6806956	Ecm2	4.98247	3.59798	4.14025	5.98666	7.77944
6807007	S1pr3	4.1969	7.43487	6.11934	6.41303	6.86594
6807041	Gadd45g	5.77257	8.37777	7.22289	7.03045	6.73093
6807336	Tgfbi	6.13881	8.88371	9.54436	9.7249	9.62974
6809655	Cd180	5.60902	7.75119	9.44225	9.9271	8.37772
6811061	Actn2	4.15544	6.12871	5.34147	4.13973	4.2379
6811520	Olfr11	3.66705	5.7487	4.7234	4.32686	4.37047
6812386	F13a1	3.74416	6.95529	8.71748	9.63206	5.76053
6812642	Elovl2	6.83324	5.42049	5.15273	4.36631	5.57327
6813742	Ctla2b	2.90077	5.40091	5.6441	4.97705	3.95033
6813887	Ctsl	8.06419	9.41537	10.5321	11.6026	9.79004
6814055	Zfp87	4.635	3.29263	3.08123	4.29953	4.44585
6815022	Ckmt2	2.41308	4.9897	3.8446	2.43797	2.2215
6817381	Plau	3.55101	5.45283	6.35428	8.50458	6.74957
6817954	Mustn1	5.40541	7.02659	8.54533	7.1684	6.99981
6818696	Lgals3	4.38514	8.84095	10.0714	10.8458	9.48053
6819250	Fitm1	3.74785	5.325	4.28589	4.15436	3.56365
6819258	Irf9	5.31455	6.93267	6.64487	6.80049	6.65727
6820361	Kctd4	5.34886	4.02131	4.08923	4.10648	4.52951
6823114	Myoz1	3.25909	5.56621	3.65599	3.46201	3.38021
6823429	D14Ertd449e	9.76964	8.26693	8.69337	8.69337	8.69337
6824266	Bmp4	6.40777	4.9866	5.25421	7.09215	7.62814
6824838	Tgm1	3.87567	8.23416	7.05169	5.35562	5.30409
6825688	Slc39a14	5.96907	7.30697	7.14725	6.84521	6.84521
6828034	4931432E15Rik	3.9203	2.22161	2.63722	2.60551	2.34577
6828472	Dab2	5.77306	8.37431	8.56903	8.98114	8.55713
6830770	Trib1	4.66075	6.54525	6.14726	5.78583	5.44139
6830927	Myc	4.82242	7.78496	7.51431	7.14498	6.21834
6831800	Csf2rb	3.37179	5.3231	6.29007	7.65822	5.90341
6832259	Tspo	4.54129	6.12139	7.28433	7.52595	6.41127
6832923	Ano6	6.03145	7.3645	7.41445	7.95028	7.59357
6833183	Accn2	6.79377	5.21853	5.00165	4.44647	5.21853
6833185	Gpd1	8.84826	10.4744	9.9682	8.00233	7.75472
6833478	Hoxc6	5.98972	4.6084	4.89507	5.46282	6.52187
6833736	Osmr	4.60913	7.96759	7.3809	7.88155	7.72894
6833937	Il7r	3.72132	5.16647	6.59035	8.69309	5.97449
6833980	Rai14	5.15879	6.75051	6.94105	7.92662	6.92407
6835945	Klhl38	4.1895	6.18759	5.18074	6.06292	5.66761
6836260	Adcy8	6.63172	5.19587	4.66862	4.55771	5.97978
6836646	Sf3b4	3.54612	4.86827	4.28882	4.50618	4.28899
6836728	Ly6a	6.09229	8.56922	8.35307	7.9515	7.10336
6836887	Mb	4.59298	7.39514	6.86832	4.63845	4.44749
6837008	Csf2rb2	3.7681	5.25602	5.97286	7.29443	5.88254
6837013	Tst	6.6177	5.28451	5.69686	6.09885	6.67889
6837848	Syt10	7.31402	5.47155	5.44218	4.61283	6.65487
6838809	Itga5	4.69602	6.79259	6.77081	7.47266	6.09753
6840129	Rtp4	5.40299	6.88131	6.91853	6.49573	6.16998
6840261	Il1rap	7.32774	8.67565	7.41636	7.11773	7.05311
6842009	Pros1	5.58028	7.03241	7.65186	8.54669	8.0278
6842587	Chodl	7.04437	5.04134	3.78226	3.85032	5.27417
6843642	Srl	3.79865	5.38698	4.71443	4.12889	4.22544
6844409	Olfr171	3.24171	4.79031	4.60744	4.95848	2.24458
6844567	Dgkg	7.64807	6.23465	5.61048	4.76571	6.3191
6844952	Atp13a5	5.42592	3.687	3.9394	4.59326	7.30059
6845444	Slc15a2	6.69485	4.79596	5.23456	6.00617	6.83654
6846576	Epha6	5.99458	4.51278	4.14554	3.73634	4.73391
6847556	Adamts1	5.42199	7.6734	7.76115	7.56917	7.49373
6847559	Adamts5	5.0844	6.74455	6.39964	6.39964	6.36974
6848568	Ezr	6.42946	8.38376	8.37633	8.128	8.0716
6848813	Gm3435	6.68372	8.43442	7.15781	6.93415	6.91515
6849595	Cdkn1a	5.85623	8.87369	8.47572	7.67696	6.72917
6850097	Clic1	5.43848	7.90763	8.49833	8.92374	7.81218
6850191	Ier3	5.54059	7.18433	7.18793	6.54563	6.56115
6851177	St6gal2	6.30137	4.74826	4.72615	4.31865	4.92194
6851232	Uhrf1	3.42126	4.76962	6.08131	5.96681	4.5891
6853899	Thbs2	6.40701	7.78034	8.04882	10.2633	9.31739
6854260	Tnfrsf12a	5.96347	8.66365	8.19545	7.28158	6.80251
6854604	Fkbp5	5.74171	7.21056	7.05309	7.30281	6.90147
6854971	Angptl4	4.59536	6.59619	6.93536	7.46498	6.14392
6854990	H2-K1	4.28946	5.79625	5.79625	6.64603	6.27769
6855018	H2-Aa	4.3584	5.69609	7.21046	7.89899	8.46088
6855067	Hspa1a	3.42943	4.83472	4.42158	3.91389	3.91389
6855155	H2-T10	4.58032	3.17697	5.87003	6.89664	6.61102
6855833	Apobec2	3.99016	5.7266	4.63234	3.86898	3.8546
6856201	Plin4	4.41786	5.89028	5.23178	5.23178	5.23178
6857183	Xdh	3.86174	5.5007	6.08624	7.22729	6.32949
6857435	Eif2ak2	5.19934	6.52363	6.74293	6.82648	6.52363
6859304	Rnf125	3.9863	6.90344	6.85561	5.68313	5.28201
6860085	Psd2	8.16327	6.4564	7.08232	6.70523	7.92138
6860520	Myot	3.16217	6.69888	5.31253	3.67155	3.17553
6860576	Kcnn2	7.20116	5.40438	5.47649	5.38757	6.53538
6860635	Eif1a	5.74664	7.11122	6.80132	7.1234	6.28145
6861458	Apcdd1	4.90839	3.09004	4.65183	4.82941	4.97136
6861707	Tubb6	5.44143	8.36628	8.38501	8.22798	6.74941
6861776	Mc5r	5.8961	4.22567	4.32411	6.53613	6.42538
6862827	Cbln2	6.62397	5.25503	4.9464	3.81192	5.25503
6864368	Gpr17	8.1316	5.80991	7.11825	8.47153	7.72149
6864456	D0H4S114	7.92626	6.33113	6.52295	8.46646	8.33203
6864680	Hbegf	6.89046	9.21079	8.56747	7.18414	7.19481
6864700	Cd14	3.63614	7.5225	7.77441	7.9838	6.69746
6865039	Gpr151	5.08891	7.05688	5.43772	4.4862	4.69122
6865902	2010002N04Rik	6.20171	7.76238	7.48789	7.32927	6.95488
6867653	Clcf1	4.17564	6.22895	5.93968	4.47982	4.87063
6867755	Fosl1	4.53338	6.30347	5.89233	4.92277	5.14494
6867947	Slc22a8	7.06104	4.45531	4.87366	5.52377	8.21595
6868091	Ms4a4c	2.06581	3.63622	5.04023	4.19728	3.74136
6868098	Ms4a6c	3.17294	6.67546	8.73108	9.61888	7.86388
6868176	Fam111a	4.02784	5.94342	7.03777	7.1925	5.91327
6868243	Olfr1502	3.29166	5.04008	3.14815	3.42943	2.81767
6868809	E030010A14Rik	5.04813	6.39218	7.08905	6.00634	5.51448
6869032	Cd274	5.32011	6.68196	7.54903	6.97027	6.69745
6869068	Il33	7.80182	10.0696	9.54352	9.00062	8.9384
6869334	Ifit1	2.8746	6.63693	6.47856	4.86944	5.37728
6869547	Lgi1	9.09843	7.45275	7.7983	7.79907	9.06933
6869864	Cnnm1	7.73573	6.38914	5.59866	4.35814	6.40025
6870925	Gal	4.03008	6.10549	6.43316	6.33086	4.15825
6871057	Actn3	4.32349	6.99283	6.02136	4.86379	4.6357
6871566	Ms4a6d	2.09394	5.77389	7.36063	8.26383	5.70349
6872010	Anxa1	3.50018	5.44598	7.28123	9.45415	7.7659
6872462	Glis3	4.70435	6.07168	6.07168	6.51192	6.26654
6872646	Asah2	8.08719	6.63442	6.15594	6.06344	7.18124
6872781	Ch25h	2.49341	7.1945	8.36784	7.15448	6.45589
6872828	Htr7	6.96919	5.50497	5.55527	5.20471	5.55527
6874653	Ccdc3	7.30089	5.94563	6.81384	7.34829	8.23803
6874947	Itih5	6.94662	5.4247	6.30363	8.07809	9.1395
6875132	Vim	7.93708	10.5306	11.4279	11.558	11.1732
6875649	Il1rn	4.76612	7.26068	7.03532	8.68782	5.65839
6875698	Tmem203	5.26161	3.74391	3.91661	3.54296	4.6121
6876543	Nek6	6.08202	7.51141	7.67534	8.06135	7.36597
6877229	Kcnj3	7.90209	6.40383	5.43637	4.93598	6.89688
6878739	Aplnr	7.20889	5.01867	5.95529	6.96913	7.90182
6878840	Olfr153	2.69903	1.29963	2.5236	1.36802	1.06719
6880393	Thbs1	4.81166	8.26454	9.35617	10.099	9.11048
6885425	Gm996	6.3173	4.91953	4.46555	4.26254	5.17609
6885873	Lcn2	5.47622	11.4584	10.8478	8.22085	10.9527
6887205	Kcnh7	5.87171	4.49928	4.04098	3.60655	4.49928
6888593	Olfr1216	1.60223	4.36332	3.58321	3.92119	1.68276
6889258	Cd44	3.61118	6.20764	6.01494	5.91095	5.34251
6889660	Bbox1	6.67217	5.0797	5.21694	5.54923	6.69149
6890120	Gpr176	6.30207	4.97068	4.60744	5.1026	4.74136
6890838	Il1b	3.11069	4.75048	4.21863	4.12282	4.12282
6891295	Pak7	5.91426	4.50928	4.23948	4.04755	4.50928
6891879	Thbd	4.58768	6.65428	6.3542	6.85721	7.9574
6892306	Necab3	6.89632	5.52779	4.99237	4.10948	5.41137
6892579	Tgm2	4.80799	7.1135	7.22438	7.74619	7.1135
6892800	Jph2	5.09101	3.35631	4.41261	3.13055	5.08303
6892905	Sdc4	8.20241	9.87274	9.64629	8.90684	9.26623
6892955	Tnnc2	4.22292	8.66236	8.20325	5.89752	5.43134
6892964	Pltp	8.59082	6.53418	7.49834	9.6695	10.0097
6894253	Chrna4	7.47328	6.00892	5.13794	4.47824	6.06959
6895838	Car13	5.11912	6.57397	6.62914	7.27741	7.75069
6895855	Car3	5.90559	8.98214	7.08905	6.20263	6.94322
6896032	Cp	5.49224	7.53708	7.10905	8.68817	9.87485
6897503	Stoml3	4.37684	2.77442	2.84127	3.16208	5.05398
6898076	Tiparp	4.98052	6.34603	6.0027	6.0027	5.88052
6898138	Ptx3	3.89459	6.82465	4.44419	4.44419	4.29031
6898161	Mlf1	3.92713	5.4214	4.51072	3.87278	4.40165
6899039	Nes	3.96873	6.72891	7.57382	5.74971	5.33125
6899315	Tpm3	6.6699	8.13589	7.46501	7.24237	7.10109
6899374	S100a6	5.71759	7.88819	9.29326	8.82075	8.55293
6899378	S100a8	4.97344	7.13204	7.94979	7.53752	8.07232
6899520	S100a10	7.43255	9.43589	9.46501	9.55409	8.70745
6899651	Lysmd1	3.82977	5.31414	4.74959	3.36784	4.93054
6899760	Txnip	6.05769	7.84718	8.05603	8.75739	9.07622
6900193	Rhoc	6.7204	8.14262	8.58986	8.86906	8.08593
6901055	Sec24d	5.08482	6.45905	6.48671	7.51549	6.67447
6901119	Ndst4	6.20474	4.51011	3.53793	3.4127	4.51011
6901950	Gbp7	6.0318	7.75003	7.00223	7.12602	7.58033
6901953	Gbp3	4.52658	6.39193	5.84438	5.67078	6.00888
6901957	Gbp2	3.64083	6.27767	6.06355	6.47934	7.0549
6905289	Tm4sf1	6.39171	10.1933	9.54263	9.07017	9.10038
6905296	Wwtr1	6.30353	7.63027	7.23864	7.53217	7.58578
6905422	P2ry13	6.70975	5.015	7.4359	7.68354	7.9841
6905424	P2ry12	7.30968	5.33015	7.33771	7.35806	7.66786
6905912	1110032A04Rik	5.09487	3.59782	2.77145	3.39224	4.957
6906042	Slitrk3	8.1225	6.52277	5.8576	5.3442	6.59708
6906620	Mab21l2	7.47293	6.13915	5.39687	4.23116	6.23962
6906912	S100a9	3.57734	6.50679	7.3692	6.5093	7.66648
6906967	Sprr1a	3.84172	9.34899	10.0482	9.79601	9.16366
6907945	Chi3l3	2.17954	4.4522	7.8017	7.98739	4.12106
6907971	Cd53	5.93181	8.33966	9.59199	10.7857	8.94633
6908068	4933431E20Rik	8.88355	7.39655	7.16236	6.50443	7.85906
6908924	Myoz2	2.85792	4.5764	4.31256	3.74402	2.81767
6910173	Cyr61	5.02964	9.07229	8.65902	8.28736	7.80578
6910592	Ifi44	4.69807	6.83594	6.5691	6.05126	6.05126
6913042	Glipr2	5.17625	6.9502	7.0129	7.2388	6.77289
6913348	Tmeff1	8.68773	7.27022	7.36014	7.50307	7.69875
6914190	Tlr4	3.64875	5.39717	5.64341	6.96337	5.59693
6917656	Paqr7	7.28644	5.83222	5.65007	6.41335	7.47563
6918167	Hspb7	3.9637	6.96066	6.02034	5.07548	4.69776
6919612	Naip3	3.34741	1.74257	1.89388	1.72089	2.56956
6920056	Atp6v0d2	2.70889	4.46683	6.78553	10.489	8.76116
6920754	Mob3b	8.11448	6.66163	6.51372	6.93794	7.43892
6920990	B4galt1	5.12529	6.47051	7.64061	8.82967	7.61387
6922335	Tnc	5.15478	8.10542	8.33295	8.55883	7.07485
6923059	Plin2	6.26977	8.28174	9.64208	10.8824	8.40953
6924515	Elavl4	8.243	6.76639	6.05709	5.08025	6.76639
6925984	Cd52	4.86736	6.68514	8.32662	9.23391	8.46332
6926376	Klhdc7a	5.5513	4.10391	4.0558	3.49744	5.13468
6926564	Pdpn	6.01603	7.58014	7.77571	8.15115	8.28603
6928457	Cdk6	4.10093	6.45414	6.08489	6.79602	6.08489
6928716	Steap4	2.59484	6.62559	3.68327	4.31865	7.10443
6928740	Abcb1a	6.52343	4.99556	5.96226	6.62484	8.25526
6929119	Fgl2	3.62091	5.27652	5.87067	6.3667	6.80879
6932379	Cxcl2	2.89335	4.47884	4.70693	3.85064	3.1433
6932603	Anxa3	4.91285	7.48328	8.26502	8.90005	8.07731
6933072	Spp1	8.17745	11.0069	12.0793	12.3356	10.6059
6933625	Oasl2	4.23496	6.49679	5.90414	6.01131	6.01131
6934116	Myl2	2.29001	4.84441	3.47061	3.14258	2.63648
6935197	Gpr146	6.41294	4.94724	5.61838	6.59415	7.2107
6935275	Chst12	6.10519	4.67501	4.82815	6.50389	6.27399
6935490	Arpc1b	7.5752	8.9381	9.89289	10.3387	9.36457
6936140	Grm3	7.47044	5.63011	5.15134	4.78013	6.44149
6936406	Cd36	2.32759	6.20206	7.06699	9.68966	5.37751
6938167	Ccdc149	5.88571	4.39452	4.09554	3.31086	4.34655
6939990	Cxcl10	3.61969	7.40727	7.16857	5.0548	6.0935
6941182	Tmem119	5.24834	3.14414	5.28587	6.32093	6.09424
6941344	Cit	6.65263	5.24475	5.00107	4.08722	5.53391
6942524	Serpine1	4.35126	8.61526	8.59427	7.00984	5.47855
6944380	Met	4.08647	5.49377	5.45596	5.42985	5.50286
6945308	Akr1b8	3.10127	6.21687	6.88801	7.47249	6.21067
6946055	Gpnmb	3.77794	6.24707	10.0799	11.9987	10.6625
6946339	Chn2	8.57247	6.86738	6.67306	7.87237	7.94802
6946750	A930038C07Rik	5.76584	4.13225	4.45718	5.58194	6.9172
6948797	Cntn4	7.0808	5.51532	4.66637	3.51121	5.51532
6949007	Lmcd1	4.37998	5.89881	4.95927	4.60489	4.78049
6949526	Ninj2	6.82578	4.71687	4.59131	5.19081	5.45057
6949613	A2m	7.04821	5.17279	6.70698	8.22263	9.42399
6949744	Clec4n	3.06882	4.98052	4.98052	7.11926	4.08626
6949746	Clec4d	2.93204	4.64104	5.98282	6.65396	3.72528
6949865	Tnfrsf1a	5.77098	7.32852	7.37762	8.06172	7.69304
6950413	Emp1	5.49076	9.13551	9.40877	9.84553	8.30871
6950725	Slco1c1	7.48431	5.00444	5.87003	6.04222	7.15503
6951180	Far2	6.54512	5.15434	4.90359	3.9105	5.54764
6951412	Pdk4	5.31772	8.39625	6.99128	6.0474	6.10337
6953059	Clec5a	2.9227	5.22316	6.73412	8.59155	6.3935
6953130	Olfr458	2.83539	4.76917	2.87103	3.00608	2.55912
6957044	Apobec1	4.04065	6.19808	8.1686	9.62166	8.31118
6957059	C3ar1	5.17177	9.02681	10.6557	11.2257	9.80716
6957083	Clec4e	3.14718	4.55767	5.38622	6.69697	3.43023
6957304	Prmt8	5.82266	4.34551	3.63784	3.50058	4.63642
6957410	Clec7a	3.90364	5.79788	7.05386	9.42695	8.66778
6957518	Tas2r109	2.72626	4.27012	2.98115	3.39213	3.27496
6957759	Mgp	4.86475	6.55771	7.83401	9.84948	10.0433
6958031	Slco1a4	6.90047	4.7941	5.61078	5.37014	7.10591
6958071	St8sia1	4.98516	3.47415	3.60171	2.46836	3.73332
6958765	Vmn1r82	1.86092	3.52372	3.70658	3.47681	2.27906
6959011	Ckm	4.55934	7.54669	7.01281	5.23014	4.98572
6959085	Vmn1r183	3.67369	2.29235	2.90569	3.13294	4.46723
6959124	Plaur	4.00521	5.61922	5.74041	6.38093	4.93483
6959800	Slc7a10	8.57273	6.62826	6.30755	5.72263	7.09271
6960177	Klk9	3.69304	6.40337	4.86762	5.24825	3.9265
6960178	Klk8	4.30366	6.3102	6.43067	6.24619	4.47887
6960404	Dbp	8.70103	7.02417	7.31243	7.3697	8.31179
6962086	Fam103a1	5.9337	3.64736	3.71041	4.26608	5.25474
6962376	Ctsc	4.787	7.19584	8.71724	9.1498	7.93574
6963075	Olfr572	2.91882	1.48526	1.56583	2.28666	2.87819
6963442	Adm	3.08275	6.89966	6.14289	5.09757	5.52771
6963548	Tead1	5.90391	7.26787	7.04058	7.00527	7.17362
6964160	Il4ra	5.15442	7.21736	7.72597	7.69254	6.44777
6964285	Mylpf	3.96346	7.72854	6.95238	5.29104	4.05591
6964380	Itgam	5.95203	7.45497	8.38276	9.18116	8.1897
6965206	Tspan4	5.42195	7.16742	7.23604	7.15992	6.48864
6965264	Tnni2	4.85815	8.41649	7.29435	5.50269	5.45614
6965269	Tnnt3	4.9302	8.81912	7.9283	5.85065	5.50706
6966327	Hamp	1.5164	2.89812	1.68456	1.84977	1.66237
6966337	Fxyd5	6.133	8.90857	9.73479	10.5839	9.91893
6966873	Mybpc2	3.73019	5.57467	4.87021	4.02591	3.92082
6967017	Emp3	6.23607	8.46539	9.62671	10.4125	9.5498
6967059	Saa3	3.82288	6.38239	7.57403	5.35031	7.64482
6967061	Saa1	1.55163	3.5458	1.89392	1.89392	1.78336
6967971	Aldh1a3	4.56131	6.83913	6.45024	5.67598	5.05391
6969207	Prss23	4.44417	6.76027	6.85601	6.93051	7.54632
6969612	Thrsp	7.23233	5.82226	5.3582	5.28623	6.24952
6969910	Art1	3.62115	1.97483	3.18595	2.61036	3.14525
6969997	Hbb-b1	8.28915	6.46099	6.72553	4.69919	6.34913
6970065	Trim30a	3.26061	6.03286	6.37766	7.25323	5.89392
6970340	Olfr519	3.95922	2.56211	2.10627	2.19324	2.60411
6970445	Lyve1	3.58231	6.72038	5.34655	5.37055	4.36217
6970952	Igsf6	3.98227	6.40531	8.23687	9.18623	7.77841
6971266	Atp2a1	4.06853	8.5284	6.68735	4.4379	4.63598
6971277	Nupr1	4.95949	6.40272	6.50802	7.5317	7.66859
6971316	Mvp	4.74641	6.87884	6.82413	6.48642	6.24273
6971424	Cox6a2	6.05299	8.13695	7.2723	6.60669	6.48171
6972106	Adam8	4.12376	6.74924	8.07831	8.88842	5.7587
6972159	Cox8b	4.75794	6.69662	5.18425	4.64369	4.50604
6972168	Ifitm3	7.71368	9.31681	9.83805	10.4014	10.1799
6972178	Rnh1	6.42331	7.74653	8.44676	8.9846	7.68024
6972314	H19	4.41968	7.5753	7.8282	10.6116	8.54595
6972415	Tnfrsf23	3.56117	4.90185	5.23402	6.34251	4.451
6972491	Ccnd1	7.44862	8.9744	9.4362	8.8679	8.17654
6973169	Bcl3	5.30264	7.00205	6.75594	6.70922	6.52906
6973527	Lair1	5.2672	3.69021	5.42213	6.32938	5.86627
6974129	F10	3.60499	5.2172	5.99423	5.71147	4.29043
6976237	Hpgd	6.63154	8.00671	9.2265	8.91202	8.30827
6976901	Lpl	4.81176	7.58303	6.80929	8.77178	8.00613
6977139	Tpm4	8.11072	9.4427	9.63128	10.3077	9.18592
6977260	Hmox1	4.95371	10.6996	10.8906	10.2155	6.88506
6978695	Cdh5	6.32184	7.68023	7.79669	8.37395	8.56084
6979691	Cdk10	4.85183	3.35752	3.56985	2.703	4.07619
6979919	Slc35f3	6.90007	5.5655	5.01303	4.33216	5.59435
6980871	Angpt2	4.05566	6.38759	6.31963	7.23578	6.39099
6981091	1810011O10Rik	3.86895	5.19094	5.24245	5.19094	5.9583
6981823	Msr1	2.40208	7.77446	9.15533	9.47813	7.14184
6982289	Odz3	7.33272	6.01072	5.98866	6.76752	7.47889
6982999	1810029B16Rik	6.23565	8.01095	7.19525	5.90822	5.44213
6983056	Psd3	5.65237	4.211	4.40038	4.43675	4.73857
6983265	Bst2	4.79533	6.14435	6.09251	6.64133	6.63445
6983639	Hhip	6.81688	4.80797	4.05531	5.09626	6.61738
6983782	Scoc	4.47687	6.55185	4.12746	4.25212	4.32146
6983890	Mast1	8.03378	6.68559	6.33633	5.03492	6.6253
6983894	Junb	5.37338	6.92582	6.64688	6.64688	6.55925
6984684	Cdh8	6.4698	5.08782	4.86585	3.85766	5.30349
6984824	Cdh11	8.11235	6.38909	6.77276	9.32555	9.44904
6985005	Lcat	7.79049	6.45621	7.00316	7.4675	8.38465
6985252	Hp	3.50149	8.3744	6.08269	5.78792	5.67957
6985363	Fa2h	10.4557	8.82321	8.55064	7.72046	8.75771
6985925	Mvd	7.50328	6.12469	6.05208	5.65219	5.83719
6986031	Acta1	5.25194	9.94591	9.33173	6.83479	6.08032
6986648	Casp1	3.54155	5.09278	5.41877	6.47435	5.44996
6986649	Casp4	2.70951	5.19826	5.10639	6.10521	5.46377
6987384	AB124611	2.69714	4.72812	5.72853	7.38988	5.87098
6988230	Siae	6.60091	5.24132	5.70547	6.85217	6.75802
6988976	Drd2	7.1464	5.66011	5.56603	4.45243	5.66011
6989195	Gldn	5.03805	6.68669	8.67033	5.60279	6.72981
6989974	2810417H13Rik	3.85511	5.58203	5.56498	6.24135	4.09174
6990067	Rps27l	5.55136	7.27459	7.56003	7.97431	7.1236
6990216	Anxa2	6.30492	8.55209	9.0004	9.42666	8.56305
6990715	Cd109	3.13404	6.66567	7.37288	8.47472	7.13954
6991192	Nt5e	4.7306	6.5436	5.96059	6.01519	5.68353
6992379	Ucn2	3.12198	6.06444	5.72446	4.14832	3.87251
6992946	Entpd3	6.52158	5.19294	4.70106	3.57938	5.20066
6994742	Olfr915	3.08937	4.76254	5.17331	3.24764	3.33073
6995258	Tagln	4.38593	6.76901	7.85212	7.83214	6.93306
6997197	Col12a1	4.25839	5.74414	6.34964	9.38211	8.74343
6997634	Snhg5	4.10149	6.08158	5.93317	5.51946	4.88497
6997672	Ankrd34c	5.21084	3.56501	2.78603	2.82798	3.58893
6999416	Myd88	5.1272	7.12395	7.33247	7.85381	7.39493
6999674	Slc6a20a	5.60318	3.73904	4.39496	5.96712	8.9462
6999688	Ccr1	2.67887	4.66699	5.76202	6.06856	3.49467
7004010	Retnlg	3.87251	7.12851	6.42134	6.13423	6.0192
7009748	Dgkk	5.68276	4.05755	3.83039	3.31102	4.05755
7010355	Timp1	3.58782	8.8416	9.23399	8.77242	7.42999
7010645	Il13ra1	4.45835	5.90354	6.36342	7.61276	6.9093
7011382	Ncrna00086	6.00889	4.53085	4.29923	3.99481	4.61444
7012681	Msn	7.72076	9.483	9.90482	10.0142	9.30235
7013185	Tlr13	4.16445	6.47133	8.35141	9.25316	7.34572
7013201	Lpar4	5.65448	4.29576	4.90338	6.11544	6.51507
7013294	Pou3f4	6.41142	4.48996	5.14179	5.91185	5.77808
7013982	Arxes1	7.28898	5.91984	5.67013	5.20214	5.94628
7014503	Alas2	7.64316	6.27712	6.38014	5.13618	5.67272
7017155	Mcf2	6.21774	4.73391	4.35114	3.29196	4.73391
7018366	Eda2r	3.03657	4.39407	4.63217	4.54233	4.06424
7018847	Itm2a	8.00857	6.40543	7.36397	10.1257	9.73041
7020772	Egfl6	6.76415	4.86585	4.60226	4.37289	4.86585
7020802	Tlr7	3.8437	5.50513	7.70884	8.9847	7.49936
6747326	Oprk1	3.63321	2.48333	2.60237	2.01673	2.62087
6747354	St18	6.64485	6.64914	5.6599	5.22328	5.97622
6747577	A830018L16Rik	6.28261	5.23943	5.09185	4.29389	5.23943
6747641	Sulf1	5.10307	5.15434	5.64494	7.71863	7.59875
6747805	Rdh10	5.6975	6.79085	7.10591	7.1607	6.61113
6747850	Gdap1	7.74088	7.01148	6.28823	5.23546	6.75519
6747861	Pi15	4.1985	3.97288	4.12282	6.17865	5.87028
6747871	Crispld1	3.86435	3.54444	3.54835	5.30403	5.63075
6748546	Fam123c	5.75724	5.00548	4.71364	4.25323	5.00548
6748553	Arhgef4	8.80164	8.02963	7.1488	6.8048	7.99058
6748886	Il1rl2	3.0191	3.16465	3.73631	4.34488	4.07253
6749034	Gpr45	4.08459	2.98644	2.74869	2.46067	2.87606
6749073	1500015O10Rik	4.84929	4.47788	5.09707	7.46601	8.08547
6749115	Gulp1	4.46851	3.82531	4.38677	5.79916	6.21519
6749142	Col3a1	5.71098	5.55978	6.89664	10.2853	9.5799
6749346	Tmeff2	9.46687	8.75435	8.03001	7.65315	8.43192
6749376	Stat1	6.33542	7.03108	6.91496	7.70357	7.10717
6749701	Sgol2	4.17763	4.02566	5.18379	5.6185	4.37386
6749734	Cflar	5.21052	6.00891	6.35878	6.78825	6.66096
6749735	Cflar	4.96462	6.01897	6.16322	6.79189	6.29294
6749763	Fzd7	4.44703	4.96345	5.217	6.67084	7.33985
6749835	Cd28	2.68935	2.94244	3.15862	5.30322	3.30088
6749911	Nrp2	7.20724	7.3117	7.80875	8.53134	7.76949
6749933	Adam23	9.4962	8.77475	7.97213	7.1205	8.42851
6749935	Adam23	10.0635	9.39694	8.81067	7.76184	9.10295
6750105	Mtap2	10.2869	9.8905	9.61784	8.50229	9.60509
6750143	Unc80	9.18638	8.37373	7.7543	6.4304	8.15708
6750314	Vwc2l	5.31957	4.08114	3.86015	3.60537	4.10946
6750532	Pnkd	9.32138	8.70195	7.77792	6.7996	8.16074
6750546	Slc11a1	4.80887	5.9199	7.69913	9.14863	8.21413
6750570	Cdk5r2	7.16252	6.90845	6.49062	5.83798	6.60967
6750643	Slc4a3	7.43525	6.5462	6.24851	5.64632	6.5462
6750868	Acsl3	9.4916	8.24663	7.88815	7.84082	8.57422
6751011	9430031J16Rik	5.64745	4.68858	4.41748	3.95892	4.68858
6751219	Sp100	3.90331	4.2959	5.39538	6.53992	6.56724
6751337	Efhd1	8.33448	7.27285	7.18465	6.24513	7.87526
6751344	Inpp5d	4.71497	5.20083	6.95594	8.04045	7.08304
6751362	Ugt1a10	2.63911	3.65087	3.85585	4.61604	3.85585
6751613	Olfr1413	4.62734	3.4582	4.20371	2.85268	4.31879
6751617	Olfr1411	4.9651	4.29392	3.68746	3.21358	4.41341
6751623	Gpr35	5.30041	6.24727	6.79624	7.32117	6.12181
6752165	Serpinb8	3.3348	3.88582	4.01198	5.06325	4.24296
6752222	Cdh7	6.50443	5.40438	4.47911	3.716	5.0378
6753067	Ctse	4.65258	4.79852	4.07496	7.43421	5.05741
6753068	5430435G22Rik	6.93966	6.54812	7.37434	8.91152	7.41387
6753084	Rab7l1	5.2284	5.3549	5.63718	6.75878	6.39928
6753108	Klhdc8a	6.06142	5.29684	5.01908	4.27007	5.29684
6753157	Lrrn2	6.35578	5.42747	5.42747	5.00197	5.42747
6753185	Plekha6	7.46098	6.40385	6.02953	5.4704	6.47954
6753295	Syt2	8.36972	7.55267	6.58084	5.17166	7.02716
6753592	Aspm	2.64649	2.85647	3.76651	4.39837	3.08528
6754086	Arpc5	7.56903	8.1804	8.98356	9.6107	8.56687
6754102	Nmnat2	8.7944	8.8566	8.25904	7.08234	8.04491
6754143	Rnasel	4.74424	4.87141	5.35558	6.09909	5.57003
6754325	Angptl1	2.88191	3.05706	2.94774	4.69687	4.17146
6754526	Ankrd45	5.86713	4.86585	4.51083	4.24421	5.27767
6754578	Dnm3os	2.25843	2.37916	2.4705	3.69092	2.88339
6754696	Slc19a2	7.02262	6.20104	5.80098	5.57347	6.15402
6754735	Dpt	3.74617	3.12763	3.24197	6.1269	6.31014
6754798	Creg1	8.0801	7.95156	9.14943	10.582	9.70155
6755125	Olfml2b	5.67171	4.55622	5.3995	7.00683	6.98286
6755176	Arhgap30	3.98457	4.7608	5.4973	6.68687	5.6373
6755210	Cd84	4.02474	5.26965	7.68068	9.68185	8.0868
6755216	Slamf6	2.58561	2.80058	3.26968	4.12282	3.28071
6755240	Slamf9	4.34992	3.57903	4.47989	6.01862	5.37751
6755282	Aim2	3.56013	3.43565	5.005	5.97634	5.2077
6755323	Fmn2	7.40225	6.5587	6.59578	5.9178	6.90147
6755559	Efcab2	5.35351	4.76216	4.44758	3.76846	5.32341
6755630	Sccpdh	10.0347	9.32221	9.18244	8.69749	9.25292
6755757	Cnih3	6.11276	5.87228	5.45275	4.31924	5.45275
6755856	Susd4	8.46577	7.43017	6.50321	5.70389	7.35748
6756419	Kcnh1	5.87026	5.36411	4.87654	4.28988	5.11106
6756985	Tram1	7.3013	7.78496	8.28682	9.19594	8.41485
6757120	Stau2	8.26468	7.37575	6.90835	6.09848	7.37575
6757157	Jph1	6.17662	5.25142	5.21899	4.7096	5.31117
6757301	Tram2	4.74884	5.67575	5.77921	6.72353	5.90701
6757357	Rims1	7.83004	6.86093	6.01617	4.98278	6.61253
6757479	Bai3	7.2127	5.94742	5.62961	5.24707	6.43345
6757750	Bend6	9.95183	8.94233	7.54805	7.35127	8.94227
6758036	Creg2	6.65592	5.48988	4.90507	4.55631	5.48988
6758223	2610017I09Rik	5.18501	4.22533	4.22533	3.66154	4.22533
6758261	Fhl2	5.05949	4.66219	5.07761	6.99726	7.29891
6758414	Col5a2	4.59645	4.62528	5.59739	8.06074	7.15958
6758633	Mfsd6	8.3157	7.62213	7.30949	6.60159	7.53801
6758654	1700019D03Rik	4.94741	3.84385	4.02642	3.35178	4.44165
6758691	Stk17b	4.36072	4.90128	5.99969	7.05602	6.63534
6758694	Hecw2	6.45847	5.62539	5.32939	4.86328	5.68992
6758958	Fam126b	7.5388	6.605	6.18894	5.86202	6.61698
6759391	D630023F18Rik	6.03613	4.75598	4.54702	4.22536	4.98052
6759468	Lancl1	8.33779	7.6981	7.2065	6.84286	7.62637
6759664	Igfbp5	6.70597	6.06194	7.87468	9.55897	9.48825
6759782	Tuba4a	10.0934	9.39883	8.99228	7.68844	9.10444
6759789	Ptprn	8.86403	8.67754	8.27403	7.41659	8.04973
6759792	Resp18	8.55836	7.68615	6.82125	5.45315	7.46091
6759905	Epha4	6.769	5.54431	4.82822	5.14073	6.35217
6759997	Scg2	8.27113	8.55963	7.9306	6.53963	7.72417
6760251	Sphkap	7.67652	6.89664	6.10843	5.00552	6.82695
6760292	Dner	8.00501	7.30042	6.92216	6.40385	7.4106
6760339	Zfp617	1.7196	1.78546	1.83108	3.0533	1.59639
6760347	Htr2b	2.57353	3.80621	5.68607	7.96221	5.19734
6760642	Col6a3	4.793	4.76065	5.46621	7.79631	6.48506
6760754	Kif1a	10.1542	9.91636	9.48795	8.39414	9.43804
6761692	Steap3	5.22191	6.51991	6.17315	7.20405	7.04889
6761825	Dpp10	7.25491	6.15709	5.41142	4.41872	6.05025
6761914	Lypd1	6.54997	5.71131	5.40867	4.78073	5.82242
6761964	Tmem163	8.43162	7.86846	7.02075	7.06759	7.47823
6761998	Zranb3	4.0491	3.86806	5.09477	6.92764	4.44328
6762017	Mcm6	4.21189	5.0958	6.23804	6.8421	5.14621
6762132	Mapkapk2	6.52236	7.41275	7.58522	7.89587	7.37798
6762151	Ikbke	3.70027	3.89696	4.1202	5.09237	4.1202
6762217	Tmcc2	8.63832	7.69817	7.37435	6.55136	7.59149
6762234	Cntn2	8.36498	7.88113	7.37525	6.49377	7.58502
6762353	Adora1	8.20186	7.7303	7.32825	6.57289	7.57217
6762423	Shisa4	9.62547	8.87622	8.78837	7.99932	8.57009
6762603	Ptprc	3.80343	4.90354	6.22267	7.55769	6.72773
6763132	Lamc1	6.51793	6.88746	7.24761	8.02069	8.09603
6763196	Cacna1e	6.41194	5.18241	4.72491	4.03174	5.18241
6763208	Mr1	6.74618	6.19928	7.40692	9.12514	8.34961
6763259	Soat1	6.98202	6.88075	8.07874	9.46074	8.72863
6763585	Dnm3	9.21555	8.46659	8.18685	7.11459	8.32631
6763623	Fmo1	5.67725	5.1457	5.48849	7.09634	7.71297
6763646	Prrx1	5.26252	6.07254	6.51318	7.73383	7.56033
6763706	Atp1b1	11.4386	10.9281	10.4152	9.54608	10.7998
6763903	Mgst3	8.99878	8.48471	7.83918	7.54875	8.02293
6763972	Nuf2	3.2867	3.21604	4.7363	5.19743	3.69397
6763991	Rgs4	7.61246	7.37785	6.59645	6.0014	6.85727
6764007	Hsd17b7	8.02904	8.34926	7.59538	6.1991	6.54889
6764010	Ddr2	3.96447	4.26034	4.9784	6.54895	7.44115
6764046	Pcp4l1	9.47712	9.04106	8.52747	7.27856	8.64032
6764089	Ly9	3.95655	3.95947	5.57809	7.87372	6.4388
6764093	Slamf7	2.58393	3.33986	4.02456	5.46577	4.49897
6764140	Kcnj9	5.42523	4.47724	4.15931	3.44654	4.61836
6764211	Cadm3	8.77514	8.15876	8.0806	7.05551	8.04084
6764349	Rgs7	7.63859	7.4475	6.40084	5.36504	6.87654
6764694	Enah	8.52484	8.10686	7.87204	7.16002	7.88809
6764841	Mark1	7.70287	6.79219	6.56645	5.93216	6.79219
6765153	Smyd2	8.21634	7.80777	7.18925	6.72178	7.43624
6765276	Gstp2	4.58032	5.71401	5.74486	6.54767	6.26967
6765313	Syt14	4.81891	4.54936	3.7517	3.29748	4.14005
6765332	Camk1g	6.78741	5.7648	4.8416	3.74291	5.68655
6765459	Cr1l	5.22855	5.25064	5.61048	6.62571	6.33588
6765504	Rgs17	8.57761	8.33222	7.38625	5.9998	7.61267
6765533	Syne1	7.10415	6.11845	5.5046	4.85626	6.35048
6765716	Lrp11	8.40546	7.85615	7.74239	6.61388	7.80952
6766301	Perp	4.70952	4.38232	5.74026	6.60175	7.10973
6766350	Ifngr1	6.74223	6.75537	7.30404	8.45843	8.23936
6766409	Ahi1	8.0756	7.47769	7.24064	6.5294	7.54719
6766470	Raet1e	1.76653	2.04726	2.04726	3.62608	1.99078
6766605	Moxd1	3.90717	3.52035	3.92272	6.42894	6.94459
6766623	Ctgf	5.67591	6.534	7.82839	7.61796	8.31204
6766862	6330407J23Rik	7.63988	7.4631	6.96396	6.09523	6.8169
6766863	Echdc1	7.91051	6.99955	6.41889	6.50803	7.00913
6767088	Tspyl4	9.55003	9.00992	8.20589	7.29266	8.73371
6767089	Col10a1	2.64158	2.94023	2.44227	7.69768	2.62923
6767231	Lama4	4.81484	5.08856	6.16211	7.43224	7.38217
6768076	Smpdl3a	6.79553	6.20463	7.08181	9.05411	7.71143
6768092	Lims1	7.12161	7.4128	7.86337	8.53102	7.77989
6768151	Spock2	9.79984	8.81994	8.37631	7.34743	8.75095
6768155	Psap	10.5163	10.3175	10.8829	11.9233	11.3622
6768157	4632428N05Rik	5.5398	5.2346	6.49705	8.1305	7.0853
6768479	Egr2	4.01061	5.28387	5.5061	6.05217	6.34896
6768609	Ank3	9.58997	9.2916	8.76356	7.73595	8.79261
6768783	Zwint	9.5318	9.51201	9.06914	8.09539	8.99438
6768843	Gnaz	7.76675	7.09647	6.77239	6.34533	6.95886
6768897	Chchd10	8.93019	8.45928	8.32809	7.59014	8.36586
6768928	Lss	7.95106	7.10171	5.91972	5.2652	6.13512
6768985	Itgb2	4.78137	5.85432	7.72201	9.35222	8.14834
6769080	Cstb	7.27183	8.31796	8.70506	9.26256	8.09174
6769105	Slc1a6	5.23103	4.2297	3.88195	3.4892	4.2297
6769139	Hcn2	9.45175	8.87804	8.5273	7.48936	8.34063
6769150	Ptbp1	6.54203	6.72154	7.28123	7.88913	7.39589
6769179	Cnn2	5.35199	6.08512	7.15475	8.53077	7.35446
6769181	Hmha1	4.63431	4.53972	5.20285	6.01852	5.36855
6769209	Apc2	6.90789	6.05275	6.05275	5.13972	6.05275
6769212	Reep6	7.10729	6.06149	5.89723	5.13551	6.11707
6769343	Tdg	1.71325	1.86724	1.76042	3.08479	1.73317
6769481	Btbd11	6.38615	5.73816	5.12187	4.09889	5.54494
6769597	Igf1	4.95644	4.68541	5.70298	7.79702	7.93225
6769996	Ube2n	7.31758	6.58353	5.69531	4.9159	6.11982
6770030	Btg1	6.97881	7.68472	8.04768	8.60787	8.14777
6770064	Dcn	7.64089	8.56604	9.23141	11.239	11.5842
6770072	Lum	3.81801	4.32874	6.01837	9.59569	8.96645
6770325	Slc6a15	7.24428	6.16986	5.73985	5.25005	6.18966
6770465	Ppfia2	6.55386	5.61864	5.38972	4.42455	5.61864
6770661	Csrp2	5.77708	5.23914	5.98541	7.58737	6.814
6770693	Osbpl8	7.00033	6.66485	7.40557	8.67137	7.60829
6771224	Gns	7.77014	7.75054	8.65589	9.869	9.23357
6771538	Cdk4	8.41784	9.10431	9.33362	9.99741	9.20329
6771575	Stat6	4.36605	5.02793	6.1149	7.25565	6.53519
6771581	Tac2	6.99912	5.87003	5.28451	4.78647	6.35824
6771974	BC013529	6.06446	6.92623	6.95212	7.61158	7.5061
6772104	Rab32	3.65844	4.64475	5.05861	6.30663	4.82028
6772906	Lama2	5.35451	4.64174	5.21832	6.76895	7.84296
6773069	Ncoa7	6.9366	6.3783	6.27969	5.61436	6.33657
6773080	Tpd52l1	7.51816	6.9547	6.75519	5.81067	6.91289
6773147	Clvs2	7.02245	5.98972	5.78521	4.12546	5.85998
6773174	Dse	3.61517	3.45432	4.42377	6.69378	6.20264
6773432	Slc16a10	3.48273	3.81948	3.97127	5.09973	4.06962
6773802	Grik2	6.76337	6.24059	5.69508	5.30757	6.2382
6774311	Unc5b	7.36828	6.81304	6.29304	5.8266	5.94613
6774336	Sgpl1	6.44061	7.65992	8.40404	9.45902	8.30946
6774704	Zfp365	8.07157	7.89435	7.48554	6.72862	7.46606
6774794	Cdk1	3.81173	4.33244	5.35068	6.10047	4.47056
6774907	Bicc1	5.50706	5.59085	6.61367	8.27066	8.24742
6775160	Mmp11	4.12661	3.99479	4.58344	6.65902	5.72113
6775182	Col6a2	6.0102	5.74471	6.10765	8.14795	8.33217
6775185	Col6a1	5.43331	5.4443	6.12179	8.81914	8.97015
6775201	Col18a1	4.5694	4.94693	5.41794	6.8589	6.17019
6775441	Atcay	8.1374	7.23268	6.51161	5.94936	6.94078
6775472	Gna15	4.13065	3.38896	5.07709	6.20355	5.26683
6775750	Syn3	8.31457	7.05232	6.43739	5.02409	6.98433
6775838	Dram1	4.29971	4.48619	4.58523	6.2015	4.86585
6775876	Ano4	7.29621	6.38511	5.76169	4.66113	6.225
6775984	Tmpo	5.58905	6.10041	6.66055	7.31733	6.53269
6776049	Elk3	5.82279	6.54113	7.35976	8.28578	7.43014
6776156	Plxnc1	5.22027	4.16438	5.56057	7.42742	6.6073
6776978	Zdhhc17	7.31482	6.61817	6.1439	5.8304	6.76326
6777073	Glipr1	3.67551	4.67791	6.96957	8.93413	6.46189
6777310	Lyz1	3.68808	3.94472	5.99542	7.95859	7.45494
6777355	Rap1b	8.03796	9.08941	9.77008	10.1136	9.26663
6777510	Irak3	4.73064	5.51192	5.71949	6.29486	6.09557
6777921	Kif5a	10.2366	9.94124	9.33929	7.69667	9.03274
6777956	Nxph4	6.15304	5.53359	5.18256	4.21608	5.07981
6777994	Rbms2	6.61066	6.69464	6.83728	8.06096	7.68194
6778055	Cdk2	3.98057	4.59059	5.41763	6.05423	5.20542
6778077	Rdh5	5.88735	4.74196	4.6585	4.39011	5.83571
6778355	Gal3st1	8.10346	7.00145	6.88802	6.42715	6.90756
6778521	Aebp1	6.1462	6.12947	7.26444	8.84634	9.94303
6778784	Ikzf1	4.79563	4.20752	5.60453	6.54448	5.82394
6778939	Vstm2a	9.26043	8.14945	7.08993	5.97706	8.26642
6779672	Efemp1	4.13096	4.13807	3.94717	6.35242	8.38969
6779790	Gpr75	5.9253	5.30718	4.72942	3.91184	5.22746
6779827	Nsg2	8.46878	7.57598	7.11957	6.2463	7.85764
6779843	Sh3pxd2b	5.81327	6.36643	6.46515	7.15642	6.83939
6779961	Lcp2	4.88687	5.25479	6.61985	7.32042	6.49925
6780443	Ebf1	7.87207	7.09127	6.52899	6.43584	7.78537
6780694	Gnb2l1	9.26349	10.3248	10.4085	10.7864	10.1579
6780771	Mapk9	9.43786	8.85955	8.4731	7.95732	8.72864
6780945	Fstl4	6.01273	4.95833	4.95833	4.33141	4.95833
6780986	Kif3a	8.64296	7.88705	7.62086	7.29996	7.84396
6780996	Irf1	4.28567	4.98431	4.98431	5.73966	5.74009
6781029	Acsl6	8.42473	7.83142	7.34826	6.28211	7.58653
6781090	Gpx3	6.95273	7.4085	7.6623	9.17146	8.3976
6781201	Gria1	7.59989	6.96449	6.47416	5.53749	7.11128
6781303	Hist3h2ba	4.21237	3.03936	3.67739	1.89392	3.30634
6781515	Mfap4	6.78333	5.66157	5.75485	10.3614	9.97912
6781925	Pik3r5	5.69623	5.80952	6.50377	7.94216	6.5614
6781982	Vamp2	9.39999	8.9198	8.65834	7.93261	8.84746
6782002	Kcnab3	7.16242	6.07795	5.23096	4.49513	5.71477
6782005	A030009H04Rik	8.12898	7.58409	6.96951	5.76058	7.52383
6782093	Dlg4	8.73437	8.15582	7.60992	6.91588	7.83725
6782201	Wscd1	8.63118	8.60324	8.15019	7.09227	7.72516
6782277	Camkk1	7.32433	6.27712	5.61671	4.68635	6.17609
6782288	P2rx5	5.89335	4.98566	4.63223	4.26401	4.98566
6782443	Tlcd2	4.49871	4.4336	5.05316	5.90411	6.26026
6782457	Myo1c	5.68629	6.12821	6.64253	7.31009	6.74117
6782569	Coro6	7.42179	6.29669	5.70575	4.8063	6.1513
6782626	Sez6	6.24041	5.40152	5.23605	4.90182	5.40152
6782808	Adap2	5.04558	4.96304	6.72053	8.32506	7.00813
6782830	Cdk5r1	6.75445	5.89717	5.57621	5.12016	5.8873
6782979	Slfn5	4.06102	4.54022	5.28569	6.51623	5.54955
6783297	Trim37	9.64165	9.03713	8.41606	7.61251	8.79921
6783321	Sept4	10.4142	9.74274	9.20624	8.98255	9.78578
6783439	Trim25	3.97899	4.64731	4.64731	5.46719	4.76652
6783685	Col1a1	6.9401	6.27712	8.77976	10.9858	10.7171
6783784	Phospho1	6.96288	5.94088	5.94088	4.98963	5.94088
6783785	Gngt2	2.73384	2.87365	3.4864	5.45534	3.66195
6783838	Hoxb9	7.44918	6.91322	6.23471	5.97508	6.73897
6783840	Hoxb8	8.32762	7.17225	6.74229	6.1209	7.33152
6783844	Hoxb5	6.05973	5.09663	4.79072	4.5081	5.72899
6783873	Copz2	5.65967	5.42215	6.23618	7.97983	7.33328
6784062	Igfbp4	6.75016	6.85982	7.13241	8.53105	9.02952
6784187	Fkbp10	4.99544	5.22993	5.96213	7.59197	7.04766
6784237	Naglu	4.70236	4.69983	6.10782	8.15003	6.99492
6784245	Tubg2	7.68452	6.72513	6.49105	5.717	6.72513
6784246	Cntnap1	8.53893	7.71012	6.7041	5.39645	7.21299
6784343	Rundc3a	8.57792	8.44759	8.02312	6.92926	7.87549
6784345	Grn	7.41376	7.98271	9.90254	10.9873	9.76898
6784363	Adam11	6.759	5.99153	5.73328	5.34543	5.99153
6784498	Mapt	8.13746	7.30697	6.73156	6.21311	7.2848
6784564	Mrc2	4.81457	4.35693	4.78847	6.64393	7.14033
6784594	Map3k3	6.00095	5.98323	6.53739	7.38514	6.82718
6784787	Arsg	7.54222	6.485	6.49625	6.18588	6.79737
6784844	Kcnj16	8.45195	7.51537	7.60015	6.78782	7.74258
6784845	Kcnj2	5.18751	4.94638	5.0121	6.59465	7.63008
6785111	Cd300a	3.71459	4.00891	4.74989	7.23551	5.72905
6785114	Rab37	7.86437	6.55777	6.86593	5.55708	6.29391
6785251	Mgat5b	6.15771	5.04882	4.78745	4.37347	5.04882
6785307	Birc5	3.57457	4.2254	5.01753	5.5398	4.48908
6785384	Rnf213	5.41869	6.62814	6.98726	7.81599	7.08435
6785608	Inpp5j	6.60759	5.34861	5.19828	4.51848	5.41702
6785632	Tcn2	7.70103	6.99884	8.13079	9.50529	9.21797
6785641	Mtfp1	5.70547	4.73869	4.54688	4.21668	4.90605
6785642	Sec14l2	6.71905	5.70676	5.61351	5.28994	6.05382
6785669	Cabp7	8.05639	7.62801	7.01327	5.97398	7.32221
6785684	Nefh	10.0713	9.48539	8.84915	7.74754	9.05531
6785758	Camk2b	9.62915	8.83542	8.08393	7.22034	8.68379
6785799	Myo1g	4.22134	4.31424	4.77452	5.55935	4.77452
6786044	Fignl1	3.82486	4.37781	5.28202	5.54182	4.32294
6786673	Rel	5.06136	5.29079	5.54284	6.53639	6.34254
6786914	Ccdc85a	6.60046	5.5831	5.31923	5.13474	6.0492
6787197	Kcnip1	7.3731	6.47125	5.77014	4.40193	6.24185
6787469	Hmmr	1.96431	2.30171	4.47027	5.06108	2.49062
6787525	Gabrg2	8.46314	7.57747	6.72722	5.75133	7.38878
6787527	Gabra1	8.00448	6.92553	6.20714	5.11068	6.80548
6787741	Nipal4	7.95492	7.04614	6.90253	5.45563	6.54164
6787743	Cyfip2	9.94443	9.33126	8.93296	8.48986	9.25133
6787918	Psme2	2.35165	3.06486	4.02456	6.32467	6.51649
6788064	Zfp454	5.77832	4.56331	4.0534	4.09218	4.9145
6788423	Glra1	10.0953	9.23306	8.33638	6.89532	8.89446
6788655	Gjc2	5.93347	5.1195	4.8618	3.68191	4.94414
6788657	Guk1	8.5265	8.20629	7.92819	7.15803	7.8934
6788672	Snap47	9.66493	9.09994	8.62186	8.06562	9.0114
6788741	Tom1l2	8.55399	7.91015	7.4574	7.122	8.16264
6788836	Rnf112	6.28232	5.23986	5.23986	4.83539	5.23986
6789047	Arhgap44	7.98525	7.13524	6.53161	5.53364	6.94487
6789066	Map2k4	9.09946	8.52258	8.13978	7.75884	8.35778
6789268	Alox8	6.99289	5.93381	5.42781	5.08109	5.97065
6789309	Efnb3	8.20769	7.4177	7.4177	6.43086	7.30388
6789329	Tnfsf13	4.50961	4.32806	5.68186	7.61392	6.1857
6789331	Tnfsf12	5.8432	5.76267	6.70457	7.82572	6.71394
6789420	Cxcl16	4.0174	4.70149	6.50269	8.01179	8.1492
6789448	Camta2	8.08519	7.2702	6.79708	6.68332	7.25634
6789609	Olfr380	2.97092	2.43888	3.83039	4.48149	1.98529
6789613	Olfr385	1.75826	2.79499	2.86561	3.22985	1.88294
6789741	Serpinf1	5.70841	4.78659	5.57162	7.95246	7.79693
6789969	Sarm1	5.43966	4.65712	4.65183	4.11113	4.65712
6790012	Lgals9	7.38279	8.29531	8.92857	9.77264	9.24987
6790244	Slfn8	2.39261	2.68843	3.06722	3.73401	3.38151
6790538	Prr11	3.59608	3.26974	4.93312	5.48159	3.92447
6790547	Ppm1e	7.58582	6.36371	5.51262	5.14876	6.36371
6790579	Lpo	5.30565	5.50493	5.07306	3.95995	4.97829
6790655	Scpep1	6.11407	6.23652	7.30314	8.94173	8.33741
6790664	Dgke	6.68853	5.98447	5.57136	4.9873	5.78015
6790699	Hlf	6.89343	5.73434	5.46758	5.32148	7.02568
6790944	Abcc3	4.06917	4.37908	5.75802	7.54342	5.99001
6791063	Abi3	5.08371	4.65374	5.78748	7.02759	6.10037
6791236	Stac2	6.90677	6.07674	5.46174	5.30225	5.86013
6791298	Top2a	3.25701	3.7724	6.66538	7.24775	4.71765
6791317	Krt222	7.36144	6.45689	5.7717	4.63275	6.12108
6791418	Hap1	7.00572	6.47498	6.17578	4.98051	6.285
6791428	Acly	9.28997	8.81717	8.6309	7.90531	8.49448
6791453	Ptrf	5.21579	5.79955	7.28123	7.82464	8.08146
6791501	Vat1	7.59485	7.76857	8.36005	9.16324	8.21795
6791532	Mpp2	6.60747	5.50774	5.41794	4.50472	5.50774
6791765	Nsf	10.1198	9.62723	9.05919	8.15421	9.33715
6791856	Cyb561	5.69372	5.48019	5.1421	4.36137	5.08882
6792030	Cacng5	6.26968	6.33417	5.79253	4.74187	5.64546
6792367	Cd300lb	3.23221	3.86442	4.71012	7.00451	5.36741
6792371	Cd300ld	2.25255	3.19097	3.98955	6.29926	3.98955
6792373	AF251705	2.37059	2.50708	3.88424	5.43258	4.32052
6792406	Cd300lf	3.6631	4.73392	5.18463	6.52744	4.74807
6792427	C630004H02Rik	7.50093	7.19475	7.18975	5.96654	7.18975
6792442	Hn1	6.83653	7.52054	7.63537	8.58388	7.22616
6792527	Ube2o	7.91336	7.22026	6.83671	6.31506	7.02944
6792601	Tk1	2.40515	2.45313	3.26434	4.56802	2.42483
6792657	Lgals3bp	5.86804	7.12867	7.57486	8.95687	8.63282
6792666	Rbfox3	8.44888	7.49779	6.8892	5.63392	7.27566
6792708	Nptx1	7.87671	7.36486	6.66861	5.32024	6.66861
6792733	Aatk	8.47221	7.87744	7.83989	6.90988	7.80656
6792779	P4hb	8.27324	9.15431	9.58126	10.1403	9.31254
6792786	Pcyt2	8.02817	7.7316	7.1163	6.49746	7.09325
6792814	Cbr2	4.87956	4.79249	7.83114	8.25453	7.70876
6792822	Fasn	9.05425	8.18498	7.66032	7.61982	8.18981
6792931	Kif3c	8.58264	8.00276	7.58805	7.0384	7.81086
6792965	Dnajc27	8.09777	7.15273	6.22597	5.32831	6.9028
6793226	Sdc1	5.39747	6.52278	6.52884	7.487	6.52278
6793283	Osr1	4.59319	4.1881	4.52087	7.10256	8.30865
6793639	Ntsr2	10.1173	9.49935	8.55745	8.33106	9.48967
6794104	Myt1l	7.48716	6.71356	6.1764	4.89595	6.4796
6794202	Lamb1	4.7373	5.19752	6.20685	6.85902	6.85206
6794360	Twist1	3.84277	4.3456	4.39763	5.52244	4.39763
6794550	Meox2	3.41729	3.50424	3.27495	4.7944	5.17307
6795078	Akap6	9.12083	8.69928	8.36158	7.02624	8.34675
6795522	Lrfn5	5.72527	4.71853	4.26446	3.65241	4.68706
6795811	Atl1	7.76653	6.85768	6.46989	5.58108	6.78038
6795881	Frmd6	5.47367	5.84907	6.03036	6.8224	7.05415
6795904	Dact1	4.76416	4.12177	3.83997	6.11167	6.58654
6796060	Dbpht2	7.37273	6.93739	6.56	4.7618	6.87517
6796299	Gphn	7.8584	7.0677	6.75124	6.42363	7.04455
6796403	Galntl1	8.02902	7.46497	7.45576	6.09664	7.33969
6796707	Ttll5	8.17168	7.39425	6.91719	6.5282	7.2874
6796773	Tmem63c	6.82137	5.92021	5.36733	4.41586	5.73854
6797090	Flrt2	7.65748	6.43377	6.7926	9.02056	9.00763
6797478	Rin3	4.46031	4.73748	5.33034	6.72387	5.90392
6797496	Chga	9.21707	8.40071	7.511	6.15049	7.87388
6797538	Otub2	5.33649	4.40573	4.35552	3.82191	4.44326
6797551	Ppp4r4	5.49227	5.01372	4.89311	4.15839	4.89311
6797893	Cyp46a1	6.44333	5.67256	5.36821	5.01608	5.67256
6797969	Meg3	9.19205	8.24225	7.99806	7.28925	8.24225
6797978	Dlk1	6.98812	6.59135	6.16281	5.60024	6.23173
6798180	Traf3	7.09242	6.22964	5.77505	5.45967	6.083
6798281	AW555464	8.2522	7.74101	7.36315	6.37349	7.37428
6798285	Pld4	5.91761	4.81674	8.17698	9.76996	8.13226
6798404	Ptprn2	7.73573	6.88189	6.38723	5.57586	6.8928
6798429	Cdca7l	3.85732	4.21273	4.52034	5.23423	4.4764
6799224	Pqlc3	4.58901	5.71401	7.07618	8.65973	7.56948
6799525	Rsad2	5.46774	6.72708	7.72155	6.84143	5.16334
6799857	Gpr22	6.19695	5.43785	4.71906	4.28484	5.12334
6799874	Hbp1	6.28418	5.78878	6.02636	7.74831	7.11426
6799897	Pik3cg	4.40066	3.95531	5.78792	6.97551	6.18603
6800079	Tspan13	9.09722	8.51988	8.18792	7.66063	8.97627
6801076	Clec14a	4.39884	5.1331	5.58655	5.86295	5.83565
6801335	Mis18bp1	2.2807	2.44307	3.38151	4.53473	2.6902
6801395	Mdga2	6.99652	6.02162	5.85632	5.19576	6.11318
6801491	Cdkl1	5.91477	4.82495	4.64155	3.51957	4.82495
6801499	Sav1	5.68482	5.99198	6.31574	7.08552	6.79675
6801507	Trim9	7.74767	7.38865	7.014	6.15677	7.08481
6801636	Rtn1	10.1276	9.41859	9.00288	8.59523	9.3332
6801807	Kcnh5	6.85152	5.8178	5.16257	4.41586	5.67235
6801902	Spnb1	8.02394	7.1439	6.68149	5.89135	7.1205
6802098	Actn1	5.8044	7.01968	7.09022	8.04068	7.0067
6802180	Slc8a3	7.44298	6.70179	6.02959	5.28757	6.52006
6802197	Map3k9	5.89009	4.87222	4.47128	3.97392	4.59645
6802349	Npc2	8.80268	8.89356	9.329	10.3164	9.35256
6802989	Galc	5.81049	5.13007	5.87481	7.29735	6.5487
6803133	Fbln5	4.96152	5.31028	6.02772	6.61387	6.99581
6803161	Lgmn	9.60611	9.94625	10.6046	11.1634	10.3043
6803862	Xrcc3	7.24757	6.63617	6.49105	5.88022	6.32426
6803863	Ppp1r13b	7.08231	6.48421	6.06142	5.75288	6.44869
6803891	Tmem179	7.46278	6.72905	6.35867	5.12009	6.51983
6804497	Asb13	8.84442	8.22435	7.11545	6.98086	7.98448
6804670	Adarb2	5.42982	4.30942	4.24909	3.84278	4.3131
6804900	Gng4	8.0734	7.8322	6.87579	6.55398	7.14121
6805103	Amph	8.97535	8.04245	7.31243	6.23444	7.8867
6805134	Sfrp4	4.45896	3.92156	4.75638	9.86588	10.2917
6805270	Hist1h2bk	2.762	3.29166	6.89664	7.37808	4.93812
6805357	Hist1h3d	2.25334	2.95966	3.42556	3.67091	2.2076
6805359	Hist1h1d	1.89922	2.42793	3.10284	3.51154	2.17472
6805382	Hist1h2ab	3.83941	3.21335	7.86932	7.91464	6.01312
6806034	Serpinb6b	3.7112	3.62067	4.86807	6.32449	5.37108
6806036	Serpinb9	4.07953	4.03592	3.99914	5.6574	5.49808
6806039	Serpinb1b	7.92539	7.78908	7.09724	5.39499	7.48837
6806078	Ripk1	4.67736	5.5459	6.08848	7.03604	6.1517
6806245	Ly86	7.81151	9.03771	10.1349	10.4652	9.81005
6806581	Phactr1	7.83687	7.17847	6.73566	6.18741	7.13694
6806701	Mylip	5.70683	5.71155	6.5141	8.03865	7.97695
6806791	Cap2	7.95621	6.95594	6.73847	5.7653	6.95594
6806933	Ninj1	7.06472	7.01147	8.01332	9.11045	7.85971
6806958	Aspn	3.29801	2.79099	3.11183	8.26733	5.35451
6806959	Omd	2.18105	2.31489	2.29311	4.45165	6.88786
6806960	Ogn	6.26393	7.41452	7.74539	9.87322	10.2931
6807074	Syk	3.74584	3.97326	4.82954	6.49787	5.03491
6807158	Cplx2	7.65391	6.81835	6.13816	5.92897	6.64162
6807201	Unc5a	6.62612	5.63741	5.51385	4.76497	5.63741
6807328	Fbxl21	4.30506	3.67889	3.08128	2.87401	3.89319
6807687	Habp4	9.03917	8.55012	8.31747	7.4073	8.41407
6808237	Tppp	9.26931	8.93294	8.39982	7.84151	8.53909
6808271	Erap1	5.03856	5.40688	5.76389	6.5402	6.60597
6808279	Pcsk1	5.38482	4.90943	4.44891	3.87744	4.83592
6808876	Ssbp2	8.86413	8.0107	7.66729	7.50075	8.56617
6808957	Ankrd34b	8.24166	7.21344	6.52229	5.5217	7.01395
6809032	Arsb	5.59629	4.88978	5.99087	7.01775	6.569
6809047	Lhfpl2	6.59509	6.21325	7.41876	8.91028	8.16165
6809148	F2rl2	6.28503	6.67379	4.99633	4.3564	5.66903
6809806	Sgtb	8.05333	7.58813	6.99648	5.87216	7.2794
6810063	Elovl7	9.143	8.01536	7.78537	7.14507	7.87138
6810255	Ankrd55	8.17692	7.4177	6.28684	5.36962	6.89222
6810563	Hcn1	7.83901	7.84017	7.17675	5.62831	7.03955
6810592	Fgf10	4.73703	3.61834	3.51402	2.99892	3.61834
6810782	Pfkp	8.84095	8.5141	8.15518	7.45897	8.38833
6811046	Ryr2	7.35447	6.3102	5.85164	4.61443	6.16352
6811074	Gpr137b-ps	6.68999	5.83098	6.83801	8.53695	7.59014
6811136	Hecw1	7.99304	6.72027	5.70213	4.45877	6.5209
6811530	Hist1h1b	5.33012	5.62524	6.71991	7.4208	6.0747
6811694	Hfe	5.08301	4.97093	6.2968	7.37948	7.48288
6811776	Aldh5a1	7.39666	6.44212	6.21437	5.94332	6.44695
6811806	Nrsn1	9.66104	9.3422	8.65078	7.32489	9.06809
6812212	Serpinb6a	5.7705	6.50826	7.02818	8.01345	6.91197
6812375	Nrn1	9.29138	8.48904	7.16649	5.74708	7.85408
6812505	Txndc5	7.50432	7.41004	7.90072	8.85731	8.44434
6813084	Wnk2	5.84751	4.90667	4.86083	4.36196	4.91372
6813172	Shc3	8.56365	8.4671	7.65291	6.81251	7.79872
6813229	Diras2	8.45012	7.41789	6.77171	5.74594	7.42776
6813242	Auh	8.09118	7.2653	6.98715	6.6507	7.2653
6813348	Sncb	9.21496	8.55994	7.90394	6.45781	7.95988
6813474	Tifab	4.00466	3.87763	4.77612	5.59982	5.16101
6813518	Trpc7	4.12266	3.26669	2.95635	2.68432	3.26669
6813664	Agtpbp1	9.06808	8.43183	8.20824	7.62237	8.40875
6813876	Slc35d2	2.49129	2.61594	3.11035	3.9858	2.96714
6814128	Adcy2	6.80648	5.83098	5.50627	5.16177	5.87199
6814157	Srd5a1	7.76013	6.77221	6.45736	6.02226	6.71585
6814956	Vcan	6.64396	7.44246	8.13847	9.37246	7.35822
6815027	Rasgrf2	7.46614	7.35082	7.01571	5.80246	6.88711
6815058	Thbs4	4.34561	4.37807	4.37807	5.68131	4.1644
6815248	Pde8b	7.05767	6.31692	6.12756	5.62926	6.16864
6815305	Hmgcr	9.01571	8.25996	7.31299	6.69842	7.4164
6815345	Hexb	8.12285	7.74077	9.63135	10.8715	10.2699
6815382	Rgnef	7.62511	7.02802	6.84876	6.26602	7.29475
6815522	Naip2	3.0137	3.21947	4.05992	5.55009	4.14864
6815523	Naip5	3.06272	3.15546	3.70108	5.53955	3.90696
6815529	Naip7	2.72152	2.76672	3.47177	5.16968	3.70329
6815739	Rgs7bp	8.86218	8.2195	7.52615	6.99089	8.05456
6816018	Rab3c	7.78997	6.81933	6.01692	4.22225	6.81819
6816158	Gpx8	6.04109	6.91827	7.54805	9.05161	8.56492
6817229	Nkiras1	8.42423	7.69489	6.83633	5.86521	7.42049
6817287	Nid2	5.2775	5.26599	5.94557	7.08361	7.89649
6817393	Vcl	6.48322	6.86942	7.2314	7.90057	8.02073
6817637	Anxa11	5.78585	5.73777	6.80713	7.26171	7.00572
6817970	Nt5dc2	5.38976	5.1351	6.70415	8.30715	6.5128
6818249	Grid1	7.52943	6.68899	6.37168	5.29786	6.51649
6818647	Cdkn3	3.61482	3.70709	4.62966	5.07081	3.72305
6818686	Socs4	3.59542	4.00505	4.07221	4.9284	4.48036
6818956	Rnase4	6.53302	6.31373	8.52413	9.92008	8.77519
6819153	Mmp14	6.06334	6.32491	6.93426	9.19274	8.41937
6819244	Cpne6	7.74398	6.62621	6.22316	5.54047	6.69697
6819442	Fgf9	8.26887	6.99004	5.80913	4.50626	6.77077
6819549	Fam123a	6.46798	5.50398	5.18831	4.8116	5.50705
6819591	Sacs	6.44183	5.32937	4.77803	4.57966	5.28367
6819596	Sacs	8.40257	7.25296	6.71297	6.16208	7.20478
6819602	Arl11	3.88507	4.6593	6.39881	8.57251	6.4219
6819694	Ctsb	10.6765	11.1049	11.6493	12.149	11.7578
6819860	Fbxo16	4.76077	3.78905	3.72984	3.43059	3.84148
6819883	Pbk	2.44531	2.74234	4.25126	4.31596	3.43003
6819907	Stmn4	9.0374	8.45497	8.39968	7.46774	8.29564
6819910	Adra1a	5.70998	5.17966	4.89075	4.33039	5.17413
6819928	Pnma2	6.10615	5.50922	4.87568	3.97427	5.45121
6819957	Kctd9	7.76785	7.01929	6.89532	6.12735	7.04397
6819974	Nefl	11.6668	11.2873	10.8399	9.24747	10.8519
6820040	Loxl2	4.40152	4.73793	5.39325	7.10381	6.06647
6820081	Phyhip	7.89792	6.96424	6.26886	5.29105	6.90535
6820083	Lgi3	9.75821	9.06861	8.33489	7.55309	8.64434
6820216	Rcbtb2	5.23719	4.57836	5.72164	7.31787	6.52104
6820219	Lpar6	5.53959	6.0458	6.38458	7.41219	6.99248
6820282	Htr2a	7.03351	6.87573	6.15804	4.91447	6.34203
6820325	Lcp1	6.43394	7.33762	8.36912	9.50201	8.00879
6820472	Epsti1	2.86706	3.61834	3.85611	5.02412	4.39549
6820573	Elf1	4.90286	4.85049	5.72008	6.92114	6.27061
6820752	Pcdh17	7.87296	7.21466	6.94771	6.26152	7.02901
6822367	Itgbl1	3.58155	3.05902	3.19416	6.97671	7.88478
6822731	Cadps	9.19789	8.46803	7.62941	6.3788	8.29163
6823041	Camk2g	9.32467	8.52739	7.99822	7.57611	8.64864
6823100	Usp54	8.86818	8.60445	8.33267	7.07733	8.14278
6823284	Kcnma1	7.72699	7.21393	6.64455	6.09486	6.92028
6823666	Prkcd	5.89676	5.82608	6.76373	8.0716	7.42585
6823690	Itih3	8.48569	7.8876	6.42118	6.60322	7.71096
6823709	Stab1	4.72673	5.12208	6.83107	8.08578	6.49223
6823797	Chat	5.34843	4.4494	4.03064	3.80614	4.41775
6823798	Slc18a3	6.57557	5.84606	5.90552	3.8238	5.58775
6823887	Sncg	9.85535	9.2256	8.74773	8.02375	9.10235
6824346	Dlgap5	3.21298	3.06343	4.40144	5.14623	3.48286
6824574	Rnase1	5.20394	4.01233	3.32438	3.65156	5.23581
6824581	Ear11	2.47939	3.22825	4.75448	4.25061	2.72082
6824633	Sall2	7.2031	6.03149	5.69	5.49234	6.55885
6824728	Slc7a7	3.66287	4.32701	5.57699	7.13904	6.0276
6824763	Slc7a8	5.93662	6.49807	7.77286	8.52519	7.1013
6824779	Slc22a17	9.91106	9.21341	8.56809	8.0879	9.01068
6824842	2610027L16Rik	7.02025	6.01436	5.35276	5.37186	6.96273
6824850	Sdr39u1	7.75727	6.76429	6.11644	5.46247	6.70719
6824942	Cryl1	4.67055	4.33007	5.06736	6.10192	5.7085
6825132	Atp8a2	8.12179	7.04818	6.18429	5.2177	6.78544
6825302	Fdft1	9.92028	9.89823	9.26436	7.7824	8.73866
6825439	Scara3	4.66219	5.02439	5.24665	7.1162	8.58134
6825445	Ptk2b	5.11662	5.30343	5.95728	7.10209	6.13283
6825573	Nefm	10.8634	10.4645	10.0672	8.69226	9.89993
6825704	Bmp1	6.5398	7.7477	7.83928	8.29128	7.61479
6825713	Epb4.9	8.58286	7.65056	7.18041	6.09538	7.53766
6826081	Serp2	7.3445	7.04033	6.46189	5.47303	6.37418
6827410	Slitrk1	9.09998	7.82543	6.95333	6.13821	7.90899
6827820	Dzip1	8.62599	7.71939	7.08138	6.88438	7.8101
6827944	Gpr183	5.3903	5.86148	7.47035	8.73207	7.468
6828016	Nalcn	7.54411	6.43664	5.78583	5.40613	6.94753
6828480	Fyb	3.83598	5.06593	6.44007	7.36089	6.79113
6828741	C1qtnf3	4.31865	3.59816	3.7265	8.83363	6.57862
6829068	Cdh10	7.48663	6.27104	5.92465	5.90141	6.45328
6829123	Cdh12	7.38959	6.09116	4.86703	4.39588	5.62691
6829504	Dap	6.05006	6.53479	7.97406	9.18101	7.77077
6829659	Matn2	5.30049	5.82774	6.2917	7.88017	8.07851
6829947	Baalc	9.82852	9.27368	8.72611	7.28733	9.07618
6829967	Rims2	7.72902	7.16886	6.6487	5.38969	6.84737
6830154	Trhr	5.26429	4.04964	3.58263	3.16169	4.04964
6830174	A930017M01Rik	6.1413	5.52139	5.04882	4.20709	5.44761
6830480	Mal2	6.39049	5.54182	4.83113	3.69995	5.74354
6830481	Nov	4.20935	4.9669	6.37506	7.20234	8.22573
6830506	Col14a1	3.70722	3.42868	4.04695	7.27349	6.46189
6830761	Sqle	8.60862	8.05879	7.24131	5.72273	6.67117
6831164	Wisp1	4.42859	4.73391	4.73391	5.96498	4.80402
6831511	Bai1	7.31625	6.28083	6.14687	5.4611	6.28083
6831528	4930572J05Rik	7.56999	7.03515	6.08482	5.02628	6.30496
6831606	Gsdmd	3.86802	4.13521	4.98052	6.54498	5.86129
6831687	Kifc2	6.98799	5.95025	5.40176	4.8124	5.95336
6831775	Apol9b	4.075	3.24213	3.26968	2.55246	3.35485
6831798	Ncf4	3.96761	5.1085	6.17496	7.56684	5.89231
6831821	Cyth4	5.7149	6.22025	7.60821	8.75174	7.85128
6831919	Kdelr3	4.40808	4.65244	5.37058	7.37621	5.96566
6831959	Apobec3	3.82735	4.21584	4.80944	5.73186	5.17668
6831990	Mgat3	7.65102	6.8378	6.54991	6.11132	7.15532
6832092	Mchr1	4.65565	5.22704	4.16063	2.901	3.79828
6832146	Csdc2	8.08871	7.60251	7.31619	6.59203	7.42108
6832182	Sept3	8.63886	7.81523	7.5223	6.44681	8.01055
6832276	Mpped1	7.47537	6.34827	6.19296	5.31941	6.33464
6832302	Parvg	4.54225	4.50941	5.9821	6.98674	6.01765
6832351	Fbln1	5.87236	4.97105	5.29134	8.10479	8.19805
6832538	Panx2	7.92546	7.04891	6.82445	5.41917	6.86428
6832585	Mapk8ip2	8.41544	7.81007	7.40156	5.88619	7.3496
6832719	Cntn1	10.0607	9.3506	8.79394	8.64049	9.83628
6832848	Irak4	4.74944	4.92251	5.60576	6.54355	6.01975
6833057	Pfkm	8.89631	8.41931	8.20709	7.53084	8.43247
6833061	AI836003	6.60876	5.77811	5.07169	5.01501	5.67958
6833146	Prph	7.34006	6.95431	6.12891	5.81941	6.55306
6833176	Aqp6	4.96177	4.25951	3.73631	3.61395	3.50338
6833223	Atf1	6.61592	7.04626	7.82129	8.03559	7.3955
6833276	Slc4a8	6.90523	6.73446	6.33126	5.34753	6.39219
6833286	Scn8a	8.41642	7.38554	6.30372	5.16501	6.987
6833393	Igfbp6	4.11159	3.8533	4.62099	6.5321	7.72076
6833513	Nckap1l	4.99827	6.07414	7.62487	8.99359	7.88994
6834560	Fam105a	3.86224	3.86219	5.53411	7.28395	5.98604
6835692	Ext1	6.32435	6.37151	6.81964	7.66063	7.37606
6835759	Enpp2	10.8285	9.86596	9.39961	9.38855	10.0812
6835934	Atad2	3.60457	3.72165	4.74073	5.67494	4.27323
6836305	Kcnq3	7.11158	6.01435	5.60469	5.30753	6.36034
6836341	Sla	4.46851	5.36189	6.86635	7.61894	7.02901
6836558	Fam135b	7.29252	6.25551	5.43843	3.96692	6.0463
6836560	Fam135b	7.35895	6.40272	5.5693	4.61112	6.28044
6836691	Arc	6.40113	5.83248	5.56797	4.66363	5.59349
6836699	Lynx1	9.86125	9.17346	8.3423	7.45481	8.71155
6836830	Scrt1	7.73194	6.62196	6.19465	5.49548	6.38803
6836851	Lrrc24	6.25054	5.26961	5.17247	4.69455	5.26961
6836973	Myh9	6.67615	7.75559	8.34612	8.72938	8.05984
6836991	Cacng2	9.55407	8.74995	7.7111	5.9183	8.13659
6837006	Pvalb	7.18554	7.56768	6.21196	4.51206	6.34254
6837022	C1qtnf6	3.17622	3.24775	3.54784	5.30114	3.866
6837028	Rac2	5.34106	6.63167	7.83409	9.29061	7.80187
6837041	Elfn2	6.68806	5.88227	5.44498	5.21405	5.62137
6837335	Pppde2	9.30835	8.72569	8.27992	7.89087	8.49416
6837415	Nfam1	4.28946	4.25544	4.94656	6.24665	5.01147
6837435	A4galt	4.5978	4.56337	5.3919	7.01337	7.11148
6837447	Ttll1	8.86735	7.98577	7.54715	7.52252	7.94298
6837470	Sult4a1	9.18326	8.50522	7.85639	6.29825	8.18491
6837507	Ldoc1l	6.72791	5.97725	5.62194	5.04796	6.10888
6837785	Mapk11	6.22498	6.1426	5.57162	4.75847	5.31169
6837787	Plxnb2	6.5902	6.47914	7.67311	8.73118	8.33038
6837791	Fam116b	6.52278	5.53501	5.33156	4.55995	5.53501
6837925	Kif21a	9.04638	8.73248	8.36335	7.13353	8.38144
6838171	Nell2	8.54951	7.67739	7.06625	6.45367	7.74085
6838392	Rnd1	6.93576	7.47981	7.02345	5.3433	6.18689
6838450	Fmnl3	5.0046	4.61568	5.54939	6.38144	6.00005
6838460	Faim2	10.6041	9.91092	8.73927	7.53592	9.41789
6838492	Lima1	5.67277	5.62266	6.21018	7.62849	7.53451
6838746	Map3k12	7.47527	6.3762	6.03629	5.81467	6.52097
6839231	Abat	10.0241	9.49413	8.83709	8.3024	9.57536
6839557	2900011O08Rik	9.21163	8.6444	8.18775	6.92299	8.39257
6839624	Snai2	5.36095	5.08979	4.95842	7.36896	6.94136
6839744	Aifm3	5.93415	5.18391	4.98052	4.5472	5.64794
6839751	P2rx6	5.7811	5.07146	4.7829	4.32385	5.16242
6839943	Vwa5b2	5.78602	4.87899	4.63712	4.43657	4.87899
6839944	Vwa5b2	7.11724	6.58555	5.8039	4.82887	5.90506
6840101	Kng1	2.03794	2.3235	2.34187	3.73772	2.53971
6840357	Hrasls	5.69787	5.08096	4.69915	4.29664	5.09231
6840516	Pigz	7.70878	6.42211	5.96603	6.14607	7.07658
6840586	Tnk2	7.69019	6.83734	6.4973	5.92868	6.82355
6840637	Itgb5	7.06062	6.42156	8.19961	9.44593	9.05057
6840705	Adcy5	7.54131	6.72418	6.6392	5.7862	6.75779
6840734	Parp9	4.16196	4.98052	5.33874	6.01756	5.36072
6840778	Hcls1	5.01343	5.78105	6.59321	7.26223	6.52914
6840818	Fstl1	7.83879	7.88413	7.98398	10.0838	9.42053
6840849	Cd80	3.16598	3.55512	3.86548	5.03433	5.04357
6840981	D930030D11Rik	3.75208	2.8376	2.09638	2.34929	2.74315
6841136	Cd200r1	2.49129	2.74176	3.29481	4.94316	3.0544
6841140	Cd200r4	1.82983	1.8322	1.8322	3.91072	1.75718
6841160	Ccdc80	5.29095	6.20425	6.57297	8.26405	7.63163
6841372	C330027C09Rik	2.61245	2.71161	3.31062	4.40193	2.70496
6841712	Abi3bp	4.79511	4.20098	3.73375	6.67554	8.12332
6841862	Cpox	8.05047	7.18971	6.85327	6.59413	7.26951
6842682	Ncam2	8.77066	8.06699	7.66082	7.38893	7.95484
6843177	Ifnar2	6.7279	6.96127	7.53274	8.39326	8.02344
6843178	Il10rb	6.51124	6.78294	8.29666	9.57998	8.76132
6843384	Ttc3	9.88059	9.29793	8.87358	8.54586	9.30883
6843419	Kcnj15	3.42599	3.39482	3.40395	4.87263	3.76765
6843491	B3galt5	7.02595	7.26535	6.42488	5.14532	6.10295
6843500	Pcp4	9.87276	9.49497	8.69957	7.65228	8.80366
6843634	Adcy9	6.15653	5.2518	4.4727	4.77198	5.53028
6843663	5730403B10Rik	8.76103	8.00309	7.3583	6.86964	7.97485
6843680	Rogdi	8.15677	7.36852	6.96108	6.55168	7.39794
6843861	Grin2a	6.53133	5.2731	4.90166	4.24617	5.2731
6843889	Dexi	9.10983	8.67194	7.95012	7.69839	8.10251
6844176	Ube2v2	8.36588	8.01536	7.12522	6.90626	7.82511
6844187	2310008H04Rik	4.33614	5.14007	5.30464	5.67819	5.1643
6844253	Sdf2l1	6.29012	6.95559	7.42833	7.69132	6.60833
6844321	D16H22S680E	7.74627	6.88858	6.70373	6.27447	6.8472
6844442	Map6d1	7.53453	6.44686	6.14693	5.82791	6.40331
6844649	Sst	9.79894	9.16973	8.70882	7.00402	9.01226
6844806	Leprel1	5.75548	6.36371	6.71185	7.54143	7.24678
6844955	Atp13a4	5.8408	6.3815	5.38139	4.08862	5.44866
6845025	Lrrc15	2.62794	2.70503	2.65615	4.52507	2.58667
6845154	Lrrc33	3.33659	3.65648	4.22117	4.99543	4.06626
6845375	Parp14	3.88163	4.65599	5.68522	6.53854	6.20018
6845377	Dtx3l	4.64107	5.84781	6.12155	6.95447	6.14039
6845416	Stfa3	1.52958	2.21336	2.93364	3.68653	1.67717
6845435	Cd86	2.5187	3.28261	4.11558	5.36519	4.19954
6845459	Stxbp5l	6.83143	5.80351	5.17008	4.24217	5.74792
6846006	Phldb2	4.0382	4.16163	4.73838	6.73161	7.07565
6846440	Tmem45a	2.90259	2.77482	2.93175	4.69755	3.84325
6846468	Col8a1	3.58977	3.91135	4.86585	8.5295	7.13308
6846670	Epha3	3.8439	3.2896	3.54205	6.79116	6.38714
6846799	9330155M09Rik	3.36003	2.39806	2.31443	1.95819	2.36752
6847090	Robo2	7.71717	6.67837	6.17351	5.90419	7.25338
6847190	Samsn1	3.69629	4.1805	4.67974	5.13118	4.54693
6847659	Grik1	4.80098	3.74623	3.43132	3.31904	3.74623
6847805	2610039C10Rik	3.95397	4.18795	4.73838	5.73507	4.59447
6847972	Runx1	5.11039	6.09788	6.38757	7.30461	6.41421
6848179	Dscam	7.42544	6.23564	5.68445	5.46677	6.23564
6848504	Snx9	6.23649	6.60097	6.87013	7.66245	7.06695
6848583	Prr18	7.23432	6.86118	6.37238	4.78489	6.41395
6848594	Pde10a	6.18597	5.35445	5.35445	4.72208	5.35445
6848737	Rps6ka2	4.99429	4.04736	3.79283	2.94542	3.82768
6848761	Smoc2	4.35107	4.29321	4.39769	7.09431	7.1364
6848854	Fam120b	7.31069	6.46023	6.20539	5.98666	6.80262
6849091	Zfp52	2.68793	3.7437	4.29582	4.40788	3.93866
6849297	Caskin1	7.71366	6.44212	6.13016	5.35696	6.44212
6849316	Sepx1	7.89275	8.2731	9.13241	9.83088	8.60936
6849386	Gng13	5.22992	4.80993	3.58587	3.7623	4.44945
6849458	Atp6v0e	7.02716	7.72267	7.96734	9.08331	7.84895
6849515	Pacsin1	8.37443	7.67686	6.94669	5.67	7.21651
6849543	Rpl10a	5.93374	6.784	7.02172	7.25864	6.41033
6849762	Glp1r	7.80838	6.84804	6.09615	4.96582	6.48628
6849766	Abcg1	6.87221	5.748	6.84905	8.6559	7.79807
6849951	Myo1f	4.86988	5.21907	6.3328	7.94587	6.71905
6850019	Tap1	4.21973	5.47602	5.86158	5.6796	5.82953
6850021	Psmb8	4.35781	5.59612	6.7789	7.55921	6.95879
6850033	H2-Ab1	4.57085	5.25658	5.92411	6.37437	7.89289
6850062	Prrt1	6.54831	5.7187	5.62459	5.05178	5.789
6850131	Atp6v1g2	10.0439	9.55321	8.91152	7.67115	8.73026
6850135	H2-D1	7.61139	8.55209	10.1601	10.7564	1.81538
6850271	Gabbr1	9.66792	9.0402	8.72566	7.51945	8.87117
6850308	Olfr111	2.9907	1.98771	2.96569	5.73485	5.29731
6850540	Rcan2	8.8841	8.69843	8.27254	7.50941	8.3876
6850552	Enpp5	9.5137	8.79964	8.51645	7.84635	9.07669
6850831	A530064D06Rik	2.70366	2.95129	3.31887	4.89121	3.57153
6850834	Trem2	5.1916	4.87723	7.85895	9.3248	8.38046
6851193	Shd	7.54959	6.49105	6.00251	5.54233	6.49105
6851198	Fsd1	7.96247	6.97113	6.61939	5.89691	6.92823
6851322	Vav1	3.59681	4.18823	5.32911	6.40352	5.32911
6851324	Emr1	4.25666	5.06476	7.50581	9.18186	7.47543
6851669	Man2a1	5.01854	5.24448	6.65544	8.19782	6.43769
6851897	Epb4.1l3	10.1681	9.65099	8.96923	8.61989	9.31427
6851927	Dlgap1	7.78302	7.00707	6.69139	6.14635	7.02229
6852068	Clip4	8.33835	7.8446	7.22354	6.90706	8.01166
6853533	Tcp10a	1.6888	2.66895	3.14815	3.12597	1.06719
6853780	Igf2r	5.94014	5.50602	5.87727	7.44218	6.13961
6854273	Flywch1	7.88143	7.49407	6.86413	6.22167	6.96058
6854383	Syngr3	8.43352	7.40074	6.92397	5.76088	7.32774
6854400	Mapk8ip3	8.75685	8.50933	8.02563	6.89663	8.01597
6854446	Rhbdl1	7.45913	6.45527	6.06941	5.34341	6.42869
6854467	Arhgdig	6.90908	6.34014	6.16549	5.32854	6.26068
6854514	Bak1	5.5796	6.5485	6.99814	7.26545	6.39404
6854537	Grm4	5.95898	5.05317	5.05317	4.29773	5.05317
6854962	Rab11b	3.66834	3.79278	3.4316	5.16615	5.04716
6855013	Psmb9	4.71404	4.7754	5.47821	6.37612	5.97492
6855040	Egfl8	5.24283	5.85925	6.99893	6.85348	7.98687
6855068	D17H6S56E-5	3.54156	3.95134	5.00654	5.21872	3.79464
6855084	Aif1	4.53264	4.81716	5.78663	6.61802	6.03059
6855225	Mog	10.671	10.6793	9.88289	8.83587	9.56232
6855478	Slc25a27	7.07187	5.96735	5.59475	5.38738	6.12834
6855608	Tmem151b	6.57816	6.06844	5.86888	4.97493	5.93777
6855701	Ttbk1	6.53828	5.44192	4.91726	4.15014	5.15551
6855829	Nfya	6.77469	7.0974	7.57299	8.34813	7.44647
6855981	Satb1	7.76383	6.97396	6.3691	6.12802	7.12076
6856133	Slc5a7	7.43942	6.40134	5.4324	4.69298	5.98089
6856584	Pja2	9.95882	9.51586	9.06657	8.56517	9.4587
6857078	Ndc80	3.28557	3.61834	4.43879	4.79448	2.63271
6857433	Heatr5b	5.25321	4.11986	3.73284	3.7062	3.84285
6857483	Cyp1b1	3.62711	4.70207	5.37003	7.92301	7.52008
6857645	Slc8a1	6.52921	5.46324	3.78335	4.04237	5.68355
6857834	Prepl	10.2087	9.75714	9.04964	8.21247	9.54361
6858563	Svil	4.80944	4.97206	5.29489	6.30602	6.12654
6858773	Colec12	5.0436	4.72202	6.31008	8.25144	8.36486
6858936	Impact	9.51689	9.08884	8.64056	8.16781	9.16044
6859953	Kif20a	3.66836	3.63374	5.0347	5.79662	3.94854
6859971	Reep2	8.19926	7.6566	7.22041	5.97101	7.03916
6860165	Pcdhb3	5.71451	4.86032	4.41909	4.0459	5.3586
6860176	Pcdhb8	5.31401	4.49225	3.97255	3.06055	4.30264
6860195	Pcdhb15	5.98117	5.17674	4.69115	3.97226	5.41176
6860224	Rell2	8.44688	7.79919	7.23789	5.45051	7.30083
6860259	Arhgap26	6.81826	6.15777	5.76765	5.27268	6.31148
6860780	Tnfaip8	4.27812	4.32173	5.13934	7.07512	5.40825
6861278	A730017C20Rik	8.32754	7.44928	6.74241	6.10017	7.44928
6861341	Cd74	4.46002	5.66891	7.33876	7.90057	9.84272
6861350	Camk2a	8.10946	7.42916	6.92363	5.48291	7.30035
6861354	Pdgfrb	5.88296	5.50351	6.33051	7.7094	8.12809
6861358	Csf1r	7.71309	6.53774	8.5487	9.42437	9.35222
6861437	Htr4	5.56889	4.56363	3.92998	4.13168	4.33394
6861441	Spink10	4.11109	3.16799	3.14815	2.62562	3.14815
6861468	Napg	8.56127	7.9545	7.61182	7.08481	7.88478
6861547	St8sia3	8.34013	8.04288	6.95818	5.42899	7.25688
6861639	Grp	5.3922	5.86281	5.26769	3.96668	4.88333
6861688	Gnal	8.01189	7.4208	7.07058	5.48694	7.07058
6861711	Slmo1	7.10463	6.26366	5.86885	5.26614	6.18977
6862102	Acaa2	5.90608	5.7601	6.14155	7.41425	6.54813
6862281	St8sia5	7.74223	7.46167	7.17604	5.8342	6.68867
6862816	Neto1	7.09052	6.60931	6.3423	5.51108	6.21635
6863048	Map3k8	3.35269	4.06915	4.29194	4.86746	4.493
6863326	Abhd3	8.64006	7.9055	7.11219	7.04544	8.20847
6863857	Nol4	5.91182	5.22669	5.03926	4.51047	5.22669
6863965	Rprd1a	8.18753	7.38831	7.18517	6.68905	7.46395
6864404	Gypc	3.89195	3.73943	4.53534	5.60632	5.97453
6864444	Stard4	6.5387	6.26899	5.37281	5.11273	5.90499
6864609	Tmem173	5.76539	5.87305	6.3371	7.35842	6.96847
6864789	Gnpda1	6.26541	6.35814	6.9208	7.96638	7.22688
6864837	Fgf1	9.30727	8.69719	8.11443	7.17653	8.70188
6865221	Trim36	6.00472	4.91917	4.91917	4.1523	4.91917
6865238	Cdo1	6.38147	6.93408	6.85487	7.88979	7.21315
6865267	Sema6a	8.7027	7.86054	7.79869	7.32723	7.66574
6865551	Ppic	5.64336	5.68789	6.8002	9.55903	8.70528
6865792	Fbn2	3.9776	3.66516	3.74991	5.45967	4.55968
6865971	Slc26a2	5.45442	5.04662	6.05666	7.19282	7.75001
6866054	Fam38b	3.72568	3.94628	3.53773	5.35692	4.78342
6866233	Lman1	7.28578	7.48485	8.0023	8.84998	8.30355
6866364	Mc2r	2.90742	3.07113	3.07113	5.33923	3.04851
6866545	Dcc	5.62682	4.45089	4.36177	3.78675	4.45089
6867197	Cndp2	6.07342	6.68775	7.14143	7.46144	6.57436
6867363	Socs6	6.52789	7.07206	6.7596	7.91751	7.42889
6867379	9330132A10Rik	7.89846	7.50964	6.69574	6.02858	7.3085
6867615	Unc93b1	5.70251	5.35335	7.21275	8.84858	8.1172
6867618	Aldh3b2	3.82892	4.86585	3.57978	5.37482	4.74807
6867638	Pitpnm1	7.73634	6.89664	6.63175	6.30519	6.89664
6867677	Pcx	7.09359	6.17439	5.98487	5.41348	6.17714
6867685	Spnb3	6.86217	6.89226	6.16058	4.99352	6.24697
6867720	Cd248	4.63858	4.20924	4.59548	6.18039	5.38654
6867761	Efemp2	5.7501	6.7763	7.29431	7.94366	7.57034
6867853	Map4k2	7.20717	6.33542	5.81534	5.51971	6.30098
6867859	Pygm	8.69718	8.73061	7.91746	7.1042	8.29697
6867861	Nrxn2	8.55108	7.78496	7.51997	6.92341	7.78496
6868017	Rab3il1	5.08268	4.96536	6.16382	7.11202	6.2987
6868032	Syt7	7.13058	6.09702	5.50931	4.80242	5.83792
6868058	Slc15a3	4.82926	5.65385	6.43771	7.77792	6.48474
6868105	Ms4a6b	2.76584	3.93471	6.00372	6.60087	5.03503
6868193	Lpxn	4.39298	5.17745	5.92644	7.04672	5.70542
6868728	Apba1	8.08258	7.30814	7.25912	6.56369	7.30814
6868830	Dock8	4.69707	4.73324	5.72684	6.74926	6.10083
6868899	Vldlr	7.69218	7.13494	7.13494	6.07701	7.11858
6869013	Slc1a1	7.42037	6.7859	6.10212	5.96084	6.43618
6869370	Kif20b	2.55891	3.1147	3.73631	4.40543	2.84973
6869503	Kif11	3.28724	3.32697	4.94543	5.72356	3.97904
6869509	Hhex	4.00918	3.95563	4.52451	5.5586	4.68454
6869537	Cep55	2.97466	3.30882	4.67577	5.09333	3.40359
6869635	Entpd1	6.22093	6.53244	6.89969	8.00842	7.81122
6869801	Golga7b	7.05527	7.1042	6.4124	5.48822	6.59917
6869918	Scd3	7.18063	6.61653	5.92549	5.51917	6.56083
6870125	Ina	10.335	9.47459	8.55292	7.16584	9.12598
6870181	Gsto1	6.68034	6.5943	7.04544	8.1475	7.04025
6870193	Sorcs3	5.72501	5.17827	4.98094	4.16141	5.04882
6870614	Casp7	4.99782	5.24884	5.66545	6.32742	5.65499
6870956	Tcirg1	5.53773	5.28024	6.70443	8.22666	6.9743
6870958	Aldh3b1	5.44938	5.3705	6.05237	6.90644	6.05639
6870979	Carns1	7.11046	5.92877	6.11161	5.54611	6.55224
6870991	Ankrd13d	6.1198	5.1423	4.83479	4.75622	5.1423
6871060	Peli3	7.04565	6.2041	5.97407	5.03762	6.08739
6871074	Tmem151a	8.06932	7.68502	7.22133	6.68067	7.2154
6871076	Cnih2	7.58716	7.09697	6.95535	6.21084	6.81594
6871078	Klc2	8.54397	7.70027	7.03134	6.18227	7.33241
6871121	Snx32	7.85551	6.64314	6.09521	6.14093	6.98113
6871181	Tm7sf2	7.04126	6.02926	5.64328	4.89484	5.64328
6871264	Kcnk4	5.80123	4.93002	4.89343	4.45598	4.9929
6871265	Gpr137	8.39745	7.72181	7.34637	6.90289	7.58599
6871276	Fermt3	4.54541	4.56909	5.75665	6.83556	5.75665
6871283	Flrt1	7.01649	5.8184	5.58408	5.2225	6.34796
6871372	Tmem179b	6.56474	6.835	7.11423	7.8988	7.3077
6871386	Gng3	10.1158	9.47523	8.73323	8.0354	9.20701
6871425	Scgb1a1	1.68082	2.16694	1.8508	5.12911	3.6638
6871545	Ms4a7	1.90158	2.83249	4.77586	7.15721	6.20474
6871874	Gcnt1	3.77983	4.70041	5.31015	6.4746	5.02088
6871903	Ostf1	6.28228	6.66889	7.64927	8.42357	7.29403
6871929	Rorb	6.86157	6.11281	5.92009	5.51245	6.39277
6872051	Gda	3.95547	4.50831	5.37872	6.19491	4.24541
6872262	Pip5k1b	6.21142	5.29454	4.55258	4.06333	5.07353
6872530	5033414D02Rik	5.6595	5.85645	6.33993	7.33679	6.33652
6872551	Ranbp6	6.93109	6.37138	5.91064	5.13849	6.27503
6872739	Lipo1	4.06871	4.31526	4.18242	5.64109	5.11505
6872765	Acta2	6.6803	5.84511	6.90579	9.88714	8.76262
6872783	Lipa	7.62688	7.31559	9.01455	10.6551	9.21402
6872888	Cpeb3	6.93459	5.81281	5.04072	4.49904	5.8179
6873111	Blnk	4.21042	4.01708	5.26459	7.03287	5.9182
6873127	Opalin	7.98746	7.9634	7.11939	6.43448	7.04521
6873133	Pik3ap1	5.06311	5.67582	6.63644	7.57787	6.63403
6873149	Slit1	6.0831	5.15311	5.04982	4.37062	5.15311
6873150	Arhgap19	4.19712	5.13092	5.7648	5.67687	6.04394
6873187	Crtac1	6.26236	5.20397	4.78942	3.99328	4.93065
6873217	Got1	10.3985	9.74071	9.17149	8.75392	9.59816
6873271	Scd1	11.055	10.5005	10.0453	9.63627	10.5374
6873333	Lbx1	4.46389	3.86905	3.54234	3.07649	4.09547
6873368	Kcnip2	4.98052	4.11251	3.79453	3.38558	4.13972
6873407	Psd	6.51977	5.83366	5.79194	5.05931	5.79194
6874080	Hspa12a	7.66924	6.90929	6.6497	5.98511	7.02129
6874610	Bend7	5.02036	4.34033	4.32803	3.56046	4.34033
6875181	Mrc1	3.99097	4.58967	5.58483	7.7352	7.10379
6875182	Slc39a12	8.85452	7.74761	7.10823	7.38786	8.69443
6875191	Cacnb2	7.26682	6.24781	5.93983	5.40088	6.67655
6875564	Gpr158	8.24346	8.25064	7.54075	5.92584	7.38076
6875582	Gad2	7.80143	7.48985	6.58151	5.25138	7.03947
6875592	Apbb1ip	4.83981	5.60236	6.3505	7.28155	6.35317
6875666	Pnpla7	5.2689	4.94516	5.60385	6.80995	6.35317
6875722	Abca2	9.65025	8.71139	8.28713	8.02984	8.80615
6875836	Cacfd1	4.3209	3.17734	2.86138	2.33446	3.4832
6875920	Col5a1	4.74108	4.52119	5.18854	6.74227	6.10694
6876044	Slc39a1	3.41173	4.47166	4.89561	5.85621	5.12928
6876109	Ncs1	8.83716	8.40588	7.5859	6.5466	7.73289
6876207	Pip5kl1	5.41152	5.07424	4.98052	4.07135	4.98052
6876226	Fam129b	5.72067	6.97461	7.61623	7.80031	7.12182
6876238	Angptl2	5.9484	6.39119	7.17568	8.26423	8.05344
6876943	Kif5c	9.33298	9.11224	8.59073	6.96581	8.37982
6876944	Lypd6b	5.60611	4.90278	4.5695	4.18551	4.74807
6877215	Galnt13	6.28823	5.20503	4.58847	4.1159	5.79356
6877740	Csrnp3	6.60511	5.875	4.87557	4.21896	5.72126
6877909	Dhrs9	3.50388	3.59287	4.14831	6.14812	3.81817
6877963	Gad1	8.6616	7.67461	7.2295	6.55185	7.67461
6878038	Rapgef4	8.04459	7.64825	7.19662	5.6007	7.20506
6878265	Hoxd10	6.09162	6.21443	5.79344	4.70996	5.73517
6878344	Osbpl6	7.91142	7.10541	6.00333	5.20295	6.76657
6878406	Gm14461	2.13572	2.30009	2.15756	3.97538	2.68425
6878448	Itga4	4.19616	3.65415	4.41138	6.37872	5.08954
6878702	Ypel4	7.9465	7.34471	6.73436	5.66748	7.13323
6878713	Slc43a3	4.22944	5.49651	6.93723	7.85592	7.80211
6878871	Olfr1161	2.65519	3.83451	4.10232	4.53667	3.15655
6879020	Sfpi1	5.08176	6.3544	7.74608	8.86766	7.70556
6879833	Kcna4	4.78336	4.15728	4.01068	3.381	4.13582
6880033	Lpcat4	8.06259	6.90355	5.89721	5.54069	6.54799
6880451	Bub1b	3.32738	3.52876	4.49818	4.74349	3.75921
6880467	Disp2	9.27283	8.55328	7.74492	6.15412	8.04787
6880468	D2Ertd750e	4.43113	4.48777	6.00235	6.73589	5.0228
6880492	Casc5	2.55497	3.11524	4.16085	4.43454	3.20965
6880529	Nusap1	3.2612	3.26469	5.28548	5.39667	3.78479
6880544	Tyro3	6.99797	6.15709	6.09457	5.60463	6.15709
6880583	Snap23	8.24593	8.85346	9.20833	9.76267	8.92983
6880639	Ckmt1	9.948	9.06857	8.32023	6.95391	8.75047
6880670	B2m	9.60608	10.5056	11.2999	11.8352	11.4498
6880842	Slc24a5	3.25273	3.04264	3.30223	5.48776	4.01735
6880931	Slc27a2	5.28247	4.02456	3.95391	3.34025	4.02456
6881031	Bcl2l11	3.88298	4.25776	4.49994	5.62888	5.33797
6881087	Mertk	5.35107	6.12932	7.0215	8.47525	7.34546
6881139	Sirpa	7.92896	7.47053	8.36523	9.3111	8.99421
6881337	Chgb	8.5137	7.87944	7.16939	6.58275	8.39358
6881455	Plcb4	8.37295	7.54668	6.98272	6.38973	7.56893
6881459	6330527O06Rik	9.7744	9.42457	8.16442	6.17353	8.58463
6881488	Snap25	12.35	12.1506	11.7778	10.8552	11.9526
6881556	Btbd3	6.82545	5.96071	5.22627	5.42415	6.16917
6881652	Macrod2	4.71909	3.82647	3.82647	2.89541	3.82647
6881771	Pcsk2	8.50464	7.6979	6.67327	5.14115	7.31865
6881870	Slc24a3	8.08889	7.40727	6.49952	6.44294	8.01088
6882333	Tpx2	4.32512	4.41262	6.66053	6.97107	5.08954
6882538	Acss2	8.16815	7.04057	6.27259	5.62734	6.51036
6882556	Mmp24	5.79241	4.91917	4.82472	4.32355	4.91917
6882615	Epb4.1l1	8.72	8.33477	7.88844	6.98697	7.99717
6882730	Lbp	4.74424	4.64451	6.05709	9.69461	10.2479
6882738	Snhg11	7.83726	6.78231	6.58326	5.54634	6.70707
6882762	Slc32a1	8.54064	7.80537	7.07138	5.88626	7.41576
6883013	Gdap1l1	7.82849	7.4367	7.37635	6.0389	6.89065
6883120	Ctsa	9.30623	9.1998	9.97974	11.069	10.6169
6883127	Slc12a5	9.2516	8.37814	7.47334	6.17471	7.96346
6883261	Trp53rk	3.12606	4.20608	3.09506	5.02914	3.52806
6883344	Ptpn1	5.52454	6.19458	6.3369	7.2346	6.30931
6884019	Phactr3	7.66126	6.85592	6.69139	6.29802	6.85115
6884129	Ss18l1	6.94844	6.34756	5.96019	5.60924	6.2466
6884295	Oprl1	6.62393	5.69645	4.91776	4.40377	5.48988
6884646	Itih2	3.90753	3.09177	3.51493	5.89224	7.95387
6885015	H2afb1	6.07128	5.94562	6.16113	4.40292	6.65583
6885287	Mastl	3.136	3.07613	3.95906	4.66338	3.22093
6885345	Cacna1b	6.608	5.65043	5.35325	4.57203	5.48988
6885399	Grin1	8.55235	7.82929	6.66866	5.44349	7.18575
6885409	Dpp7	6.12756	5.4624	6.56737	8.11972	7.02972
6885489	Agpat2	4.47115	5.08648	5.57476	6.57516	6.38599
6885506	Surf4	6.27676	6.60382	6.99284	7.78777	7.03043
6885522	Fam163b	7.04598	6.03789	5.94486	5.12681	6.03789
6885734	Zer1	7.34173	6.55149	6.22468	6.0056	6.57379
6885871	Dnm1	9.67494	9.14445	8.34743	7.32462	8.7184
6885879	Slc25a25	6.72403	6.60279	6.15614	5.30664	6.26861
6885912	Stxbp1	10.5745	10.1059	9.37834	8.10198	9.60192
6885924	Garnl3	6.72996	6.20474	6.20474	5.26067	6.20474
6886039	Stom	4.89034	5.10611	6.10899	7.48001	6.65148
6886045	Ggta1	3.73631	4.533	5.04991	5.93246	5.0274
6886117	Strbp	7.96398	7.3047	6.89664	6.14351	7.18963
6886118	Strbp	8.40451	7.16512	6.56298	5.8607	7.56417
6886244	Lrp1b	6.49042	5.46868	5.04775	4.64258	5.64277
6886732	Cacnb4	8.66257	8.04797	7.26584	6.44423	7.64777
6886947	Ermn	10.3392	9.88588	9.73139	8.98004	9.67882
6886953	Cytip	2.93829	3.31462	3.82835	4.56536	3.90198
6887079	Cd302	4.87566	5.59008	6.12617	7.46762	6.98255
6887191	Fap	1.82983	2.20971	2.33452	4.52514	3.36994
6887196	Ifih1	3.7212	4.99632	5.03265	5.34995	5.36304
6887234	Fign	4.83907	4.11015	3.40038	3.34636	4.87539
6887327	Scn1a	9.10504	7.95421	6.52519	5.10258	7.81858
6887374	Scn9a	2.84952	4.153	4.65339	4.51759	3.14743
6887380	Scn7a	3.42943	3.14319	3.25571	5.09212	6.58386
6887520	Spc25	3.03029	3.4119	4.16045	4.82867	3.41132
6887703	Slc25a12	10.0826	9.73886	9.17445	8.72792	9.49375
6887854	Chn1	9.08369	8.22754	7.64583	6.89529	8.21355
6887901	Lnp	6.28291	5.40084	5.37281	4.69218	5.37281
6887958	Nfe2l2	7.6395	7.7316	8.29301	9.03371	8.98572
6888003	Fkbp7	5.52149	5.57036	6.46253	8.56816	8.0264
6888016	Zfp385b	5.7024	4.98363	4.68012	4.22916	5.13462
6888299	Tfpi	3.52229	3.44631	4.22853	5.76895	6.02989
6888310	Tmx2	9.43996	9.04472	8.80929	7.80053	8.74272
6888324	Serping1	6.04656	6.91883	7.26238	9.70606	10.9321
6888751	Madd	6.88935	5.96944	5.9176	5.50857	5.96944
6888763	1110051M20Rik	7.55525	6.90841	6.52218	6.16821	6.90841
6888797	Creb3l1	4.98229	6.05709	5.89913	7.3113	6.72996
6888834	Mapk8ip1	8.95314	8.67612	8.32155	7.54845	8.359
6889350	Tcp11l1	7.99789	7.37668	6.74847	6.65798	7.07842
6889357	Prrg4	3.12077	3.92665	4.64886	4.51103	5.25752
6889413	Rcn1	5.48806	5.46451	5.70298	7.68177	7.03884
6889894	Arhgap11a	3.60196	3.37783	4.77292	5.74486	4.51738
6889978	Meis2	7.9836	7.05892	6.33843	6.16751	7.01228
6890288	Ehd4	5.87003	6.51418	6.87045	7.25467	6.47132
6890312	Ttbk2	8.43942	7.69021	7.34744	6.60342	7.61059
6890382	Ppip5k1	7.30189	6.27813	5.77254	5.56668	6.37866
6890402	Frmd5	7.22255	6.10692	5.64371	5.28689	6.17449
6890597	Fbn1	4.1716	4.41317	5.94219	7.91019	7.50506
6890658	Ncaph	3.85795	4.13065	5.09187	5.84676	4.40193
6890699	Kcnip3	9.28219	8.54221	8.47487	7.67435	8.53184
6890710	Mal	11.4641	11.1827	10.5352	9.55887	10.4595
6890715	Bub1	2.05972	2.35765	3.78459	4.45557	2.46547
6890835	Ckap2l	2.65938	2.66895	4.03977	4.66374	3.08979
6890837	Il1a	3.16249	4.41972	4.40503	6.29926	5.40245
6890903	Cpxm1	4.67401	4.03172	4.64161	6.74099	7.52513
6890981	Siglec1	4.98243	4.93488	5.91326	7.95228	6.3967
6891675	Snx5	8.18405	8.37364	8.92179	9.77839	8.92179
6891689	6330439K17Rik	8.22854	7.56602	6.72959	5.85146	7.24935
6891880	Cd93	4.49013	5.77346	6.81381	8.24739	6.12809
6891898	Napb	10.1919	10.0626	9.33816	7.67517	9.61646
6892090	Snph	8.15332	7.54797	7.05365	6.69732	7.30951
6892143	Nrsn2	8.30887	7.43745	6.49524	5.42897	7.09589
6892190	Dusp15	7.90354	7.07145	6.52755	6.48354	7.11631
6892374	Ggt7	7.3936	6.73673	6.43765	5.64234	6.5726
6892493	Ndrg3	10.2569	9.63819	9.09786	8.83979	9.67356
6892504	Samhd1	5.85739	6.30379	7.01628	7.99265	7.21438
6892505	Rbl1	3.99025	3.78932	4.51488	5.45967	4.45937
6892699	Mafb	6.0244	6.64567	7.72623	8.66365	7.63857
6892747	Ptprt	6.95341	5.99692	5.64955	5.0379	6.10475
6892852	Ada	4.13565	4.77426	5.47904	7.56266	5.47904
6893131	Kcnb1	6.88022	6.3038	6.20152	5.08703	6.4763
6893288	Atp9a	8.38968	7.95114	7.43713	6.81999	7.52227
6893556	Zbp1	3.78344	4.63203	4.45726	5.50199	4.63203
6893630	Ctsz	7.06811	7.93634	9.55135	10.7011	9.81226
6894265	Kcnq2	6.81116	5.91302	5.7383	4.82354	5.84108
6894268	Eef1a2	9.92615	9.44659	9.08175	7.92237	9.10967
6894281	Stmn3	10.4303	10.1333	9.31764	7.95681	9.59082
6894311	Rgs19	6.35277	5.91286	7.00503	8.12367	7.10332
6895589	Stmn2	10.8403	10.7526	10.386	9.34806	10.0895
6895672	Fabp5	4.1401	4.63964	4.86533	6.30871	4.73992
6896431	Eif5a2	8.50542	7.83619	7.33338	6.52143	7.53205
6896615	Usp13	5.6324	5.06977	4.73391	4.10386	4.92809
6896997	Hspa4l	6.23332	5.71138	5.33172	4.88427	5.75566
6897486	Lhfp	6.75849	7.21799	7.31923	8.31334	8.22197
6897557	Postn	3.57768	4.54404	6.09085	10.6816	9.13537
6897579	Smad9	6.83269	5.5823	5.02114	4.75788	6.27517
6897627	Mab21l1	5.32619	4.5291	4.46396	3.75088	4.61384
6897923	Rap2b	5.46306	5.86095	6.03416	6.88272	6.1228
6898171	Mfsd1	7.59768	7.66202	8.5564	9.37857	8.44891
6898241	Smc4	4.98942	4.98177	6.32106	6.95695	5.86807
6898477	Serpini1	7.65362	6.96917	6.54821	5.66409	6.80426
6898502	Fstl5	6.80352	5.72814	5.43446	4.09462	5.663
6898630	Fam198b	4.90092	5.50627	6.27715	7.48638	6.67341
6898686	Pdgfc	4.92635	4.71691	4.98052	6.54511	5.93069
6898873	Fbxw7	7.56471	6.65281	6.13584	5.62929	6.5033
6898995	Cd5l	2.79744	2.70379	4.22413	4.85472	2.76031
6899034	Crabp2	4.31034	3.47677	4.93176	6.71324	6.65247
6899106	0610031J06Rik	7.34441	7.06758	7.58864	8.67281	7.99381
6899111	Paqr6	8.97464	7.78496	7.42931	7.51688	8.48095
6899213	Gba	7.13056	7.49858	8.04506	8.57532	7.58185
6899249	Shc1	4.80076	4.87929	6.09116	7.27751	6.89147
6899372	S100a4	3.88786	4.49831	6.07743	7.19024	6.09187
6899429	Sprr2e	3.72433	3.14164	3.12801	2.29722	3.46594
6899574	Lingo4	8.10896	6.84681	6.16673	5.84865	6.81691
6899578	Tdrkh	6.35104	5.46536	5.17734	4.85451	5.46464
6899682	Ctsk	5.03881	4.43391	5.36071	7.95814	6.14379
6899683	Ctss	8.2184	8.46612	10.5933	11.5268	11.0206
6899743	Sv2a	9.05498	8.70722	8.15023	6.9874	8.05014
6899750	Hist2h3c1	5.47555	6.35929	6.60779	6.9924	5.39336
6899861	Notch2	5.92062	5.86061	6.389	7.47161	7.89813
6900082	Tspan2	10.5045	10.2419	9.40481	9.11399	9.59434
6900214	Kcnd3	6.0346	5.5396	5.13861	4.55318	5.54347
6900287	Kcna2	9.07082	7.96829	7.08706	6.80164	8.04292
6900369	Amigo1	6.18489	5.28462	5.1822	4.59202	5.34417
6900407	Wdr47	7.74372	6.85985	6.32231	5.87479	6.92827
6900450	Slc25a24	4.42252	5.62612	6.80202	8.0298	6.5987
6900584	Col11a1	4.31865	3.90072	4.35453	6.638	5.71992
6900608	Olfm3	6.7253	5.63265	4.56893	4.34703	5.41752
6900659	Extl2	8.12789	7.55023	6.87542	6.79116	7.43148
6900734	Frrs1	4.15131	5.19777	5.87751	7.31023	5.9323
6900768	4833424O15Rik	7.18001	6.10759	5.60036	5.55413	5.94996
6901084	Tram1l1	8.4	8.18369	7.02099	6.61775	7.55485
6901316	Elovl6	8.95645	8.01095	6.90098	6.39018	7.40983
6901335	Casp6	4.60744	4.86011	5.99139	7.4333	6.05773
6901551	Cxxc4	5.93079	4.85842	4.58894	4.1333	5.05169
6901573	Tacr3	5.4989	4.21915	3.94224	3.74695	4.83223
6901592	Cenpe	2.82148	3.15786	4.70459	5.31073	3.46921
6901671	Emcn	6.19137	7.20114	7.33043	7.99067	6.72332
6901737	Adh1	5.10364	5.24603	5.25164	6.74967	7.57294
6902179	Mcoln3	2.92295	3.32807	3.11858	6.73657	4.24098
6902183	Mcoln2	3.35151	3.68792	3.86772	4.89282	4.19573
6902880	Wls	6.98256	5.94248	6.67188	8.3452	8.25828
6903753	Ect2	3.59429	3.60789	5.40571	6.06142	4.26964
6903779	Fndc3b	5.60991	6.36584	6.89137	7.96291	7.33148
6903983	Slc7a14	8.50631	8.24047	7.68363	5.90123	7.46687
6904100	Pex5l	8.93692	8.97949	8.16021	6.8971	8.05067
6904300	Ccna2	4.47983	4.4299	8.21341	8.87145	5.84835
6905129	Nhlrc3	4.65302	4.98656	5.39729	6.31089	5.39729
6905321	Pfn2	9.31354	8.75128	8.42754	7.91531	8.70032
6905356	Serp1	6.90025	7.48985	7.8293	8.55977	7.63033
6905408	P2ry14	3.97083	3.09543	3.56664	5.71363	5.34064
6905530	Gpr149	4.01347	3.47678	3.29314	2.58658	3.56909
6905570	Plch1	5.36935	4.65662	4.45182	4.03626	4.65662
6906261	Gria2	8.26974	7.13315	6.48759	6.05325	7.18804
6906267	Glrb	9.71852	8.94295	8.33482	7.67563	8.91122
6906325	Gucy1b3	7.76865	6.82333	6.48833	6.09861	7.04821
6906427	Tlr2	4.18734	5.38919	6.12385	6.87826	6.11799
6906441	Trim2	8.44976	7.90765	7.48304	6.78831	7.73975
6906634	Dclk2	6.96796	6.08973	6.01782	5.56117	6.40163
6906642	Kirrel	2.95228	3.28703	3.66994	4.84971	5.10542
6906652	Fcrls	5.54511	6.83118	6.23597	8.2276	6.89858
6906694	Bcan	8.34545	7.4692	6.67693	7.00727	7.46446
6906698	Hapln2	7.94619	7.9385	7.5877	6.39799	6.99443
6906753	Lmna	5.51391	6.5954	6.73247	6.89236	6.4586
6906846	Chrnb2	6.12897	5.55277	4.86483	4.05009	5.08867
6907137	Tnfaip8l2	6.02241	5.98281	7.73864	9.21182	7.65368
6907148	Mllt11	10.0814	9.93658	9.21992	8.09253	9.26663
6907204	Ecm1	4.92151	6.03719	7.39147	8.29671	6.81861
6907222	C920021L13Rik	3.53819	3.27965	4.32646	5.60222	4.2465
6907224	Car14	7.88974	7.51267	6.67432	6.3502	7.40991
6907226	Plekho1	6.51042	7.17745	8.11705	8.67572	7.72076
6907255	Hist2h4	5.71879	5.65691	6.5668	7.58158	5.72865
6907262	Fcgr1	4.45293	5.30645	5.8511	5.79594	5.41134
6907623	Ptgfrn	5.88767	6.38359	6.87854	7.74697	7.26928
6907784	Olfml3	7.1559	7.71509	9.08427	10.2574	9.81092
6908029	Kcnc4	6.82514	5.90546	5.7406	4.67141	5.90546
6908031	Slc6a17	7.62865	6.75116	6.039	5.21452	6.49812
6908073	Gstm7	8.80062	8.41481	8.25239	7.15156	7.99746
6908095	Gnai3	6.87958	7.56455	7.64048	8.33598	7.75097
6908551	D3Bwg0562e	6.67598	6.11921	5.46449	4.9595	5.95589
6908569	Snx7	5.44933	5.82811	6.35329	7.40271	6.16932
6908748	Tmem56	7.80021	7.45103	6.8661	5.36449	7.05535
6909083	Ugt8a	11.2449	10.0609	9.32383	9.35348	9.83917
6910622	Fam73a	7.76517	7.12551	6.62949	6.43072	7.2019
6910642	Ak5	6.82236	6.01782	5.61658	4.79522	6.38841
6911212	Rusc1	7.14044	6.35666	6.08398	5.40438	6.27868
6911337	Lyn	5.85478	6.71862	8.16101	9.12774	8.11347
6911439	Sdcbp	8.24786	9.05822	9.41989	10.1073	9.04477
6911575	Clvs1	9.46612	9.3526	8.08398	6.83713	8.24535
6911833	Runx1t1	6.98797	6.02158	5.69378	5.58803	6.29663
6911914	Calb1	7.05257	6.06309	5.81881	4.74362	6.12978
6912040	Ttpa	4.49823	3.50451	3.3798	3.16531	3.50668
6912042	Ggh	5.55697	5.37921	6.20854	7.33649	6.5946
6912524	Srsf12	6.122	5.3358	4.82453	4.72566	5.5059
6912565	Cnr1	7.63227	6.79677	6.18313	5.68345	6.64558
6912987	N28178	7.54451	6.23369	5.79695	4.57168	6.23369
6913128	Grhpr	7.93391	7.11951	6.98003	6.60776	7.14275
6913193	1300002K09Rik	4.18874	4.40701	4.77734	6.55629	4.93181
6913270	Tgfbr1	5.87303	5.41794	6.43622	8.31482	7.86579
6913371	E130309F12Rik	6.03955	5.36008	4.8443	4.48614	5.44869
6913499	Smc2	3.84435	3.87196	5.16643	5.79437	4.34894
6913774	Palm2	7.87762	7.47142	6.5257	5.99461	6.80506
6914007	Orm1	2.0758	2.21082	2.25703	4.5692	2.42254
6914129	Trim32	7.86204	7.14869	6.40479	6.30671	7.0895
6915070	Sh3gl2	9.60058	8.66089	7.75363	6.47994	8.3628
6915843	Ak4	4.93112	3.61553	3.33642	3.2777	5.12902
6915844	Dnajc6	8.28679	7.22017	6.71631	5.65002	7.21767
6915871	Sgip1	8.12903	7.33787	6.93126	5.95031	7.2662
6915993	Dab1	8.32341	7.3558	5.91137	5.37582	7.0795
6916089	Dhcr24	10.3579	9.82518	8.7186	7.03197	8.49379
6916220	Rab3b	7.01465	6.33164	5.38593	4.96699	6.06519
6916358	Skint7	1.35793	2.04347	1.67221	2.85814	1.50931
6916504	Atpaf1	6.94144	6.21944	5.47158	4.64231	5.94796
6916663	Slc6a9	10.5157	9.57815	9.18065	8.452	9.51936
6916762	Lepre1	5.06059	4.85184	5.59647	6.66132	6.06824
6916836	Rims3	7.11116	6.18107	5.96066	5.55883	6.18107
6916947	Hpcal4	7.01199	5.99687	5.85981	4.88886	6.04186
6917120	Csf3r	4.38182	5.36123	5.90822	6.70847	6.54665
6917125	Oscp1	6.79532	5.89802	5.75761	5.21009	6.36946
6917217	Dlgap3	6.56523	5.74172	5.66015	5.20914	5.66015
6917277	Fndc5	8.82686	7.91403	6.98628	6.13558	7.5832
6917393	Laptm5	7.89193	7.80676	9.79313	11.1961	10.3914
6917809	Id3	6.19072	6.83602	6.65882	7.86232	7.86451
6917933	Hspg2	6.01592	5.89391	6.64655	7.35897	8.10134
6917963	Rap1gap	8.43292	7.15421	6.6169	6.40618	7.15421
6917997	Camk2n1	9.41451	8.98155	8.5668	7.55014	8.76182
6918131	Mfap2	5.13414	4.45085	4.92828	7.41273	7.28686
6918705	Fbxo2	8.5279	7.66356	7.62972	6.97671	7.84849
6918814	Clstn1	9.64449	9.04655	8.65175	7.90664	8.97005
6918852	Gpr157	4.84741	4.33544	5.16714	6.67824	5.35243
6918858	Slc2a5	4.54541	3.3943	3.78022	3.18703	4.29077
6918901	Uts2	7.13231	6.87407	6.77346	4.65844	6.22648
6919012	Acot7	9.46986	9.35645	8.9311	8.05047	8.74616
6919190	Mxra8	4.83687	5.16617	6.66889	8.58772	8.40905
6919296	Rps20	8.27123	9.30686	9.76379	9.98947	8.82512
6919417	Tox	5.9701	5.04558	4.85743	4.33049	5.43588
6919895	Necab1	7.60149	6.8449	6.2193	5.06516	6.81218
6920033	Cpne3	6.06841	6.20046	6.97021	7.96532	7.53738
6920256	Fhl5	2.16487	2.41088	2.46719	4.97424	3.23698
6920954	Ddx58	4.97099	6.20122	6.20122	6.58263	6.58813
6921058	Cntfr	9.0424	8.11695	7.70587	7.34829	8.27171
6921162	Tln1	6.42733	6.90429	7.5793	8.29866	7.81253
6921163	Gba2	7.26881	6.4075	5.76636	5.48348	6.26334
6921379	Trim14	4.6648	4.91838	5.37281	6.17813	5.46694
6921562	Tmem246	6.77364	5.89191	5.74248	5.17051	5.90341
6921670	Abca1	5.95273	6.59935	8.55674	10.2009	9.6539
6921986	Txn1	1.84192	2.08376	2.85594	3.26026	2.60775
6922026	Ptgr1	3.20775	3.16947	3.61834	5.02553	3.61834
6922063	Rod1	6.59378	7.89037	8.57638	9.36622	8.04946
6922165	Mup5	2.52147	3.42943	4.09602	4.06731	2.69206
6922471	Dbc1	8.03446	7.20306	6.72275	6.26007	7.28888
6922895	Ttc39b	6.73686	6.47225	5.77636	5.11353	6.07644
6923142	Ptplad2	3.39718	3.76347	5.6224	7.95751	6.60806
6923284	Elavl2	8.68332	7.74018	7.26466	6.32584	7.53059
6924181	Prkaa2	7.31567	6.8288	6.72971	5.97839	6.8288
6924382	Gpx7	5.60371	5.69877	5.98044	7.54483	6.35785
6924466	Cdkn2c	2.75416	2.89154	5.27802	5.86536	4.89003
6924706	Cyp4x1	4.83884	3.56466	3.3256	3.19115	3.56466
6924750	Faah	6.1781	4.88304	4.73059	4.38661	4.90742
6924834	Kif2c	3.6874	3.1242	5.56083	5.96787	3.95222
6924927	Olfr1333	4.6507	3.87465	4.26704	3.29057	4.13808
6924968	Rimkla	8.27923	7.12194	6.31553	5.42587	6.9818
6925247	Maneal	7.78287	6.8597	6.25875	5.67297	6.5416
6925381	Ncdn	9.597	9.07286	8.65311	7.40789	8.68564
6925547	Hpca	8.47619	7.60648	7.45055	6.37143	7.58834
6925777	Oprd1	5.94202	5.06149	5.01653	4.10561	5.06149
6925872	Gpr3	5.85226	5.81185	4.95056	4.5063	4.79085
6925904	Trnp1	9.06167	8.30253	7.70179	6.82415	8.02423
6926023	Man1c1	7.17268	6.65462	7.46417	8.64874	8.32392
6926165	C1qb	6.74739	7.64752	9.36773	10.5071	9.77371
6926166	C1qc	6.00016	6.7331	9.26016	10.3582	9.65885
6926167	C1qa	6.77149	7.35486	9.61337	10.8537	10.3358
6926329	Nbl1	5.64874	6.28477	6.27777	7.15929	7.71347
6926344	Mrto4	4.73701	3.91991	3.72716	3.17419	4.2191
6926457	Fblim1	4.81626	6.03512	6.97626	8.35659	6.65997
6926504	Tmem51	3.07743	3.33758	3.33758	4.70261	3.31362
6926654	Tnfrsf1b	4.6147	5.4141	6.5691	8.24505	6.98754
6926702	Ppp2r5a	3.06423	3.08697	4.316	5.11069	4.04858
6926864	Clcn6	8.55627	7.96232	7.66048	6.89624	7.87989
6926882	Fbxo44	8.38487	7.65069	7.11024	6.09587	7.39621
6926936	Pgd	6.71651	7.1215	7.67646	8.14542	7.49864
6926938	Kif1b	10.2381	9.70548	9.34434	8.72724	9.5836
6926976	Slc25a33	6.47705	6.20654	5.7683	4.71814	5.80686
6926988	H6pd	5.09495	5.5406	5.7834	6.70379	5.86256
6927060	Slc45a1	7.03685	6.62343	5.99407	4.81166	6.0401
6927145	Kcnab2	9.71444	9.0911	8.3672	7.64408	8.52626
6927248	Prkcz	7.30657	6.47799	5.79886	3.99438	6.24436
6928759	9330182L06Rik	6.40109	6.34042	5.70298	4.70913	5.5771
6928846	Sema3d	5.53299	5.123	5.68177	6.95237	6.54148
6928889	Pclo	8.07874	6.82187	6.32249	5.24498	6.82238
6928939	Hgf	2.87744	3.71938	3.95945	5.97656	5.08915
6929109	Pion	4.15414	4.66463	5.34645	6.10664	5.60463
6929132	Lrrc17	3.7134	3.43806	3.27942	5.34063	4.6951
6929407	Actr3b	6.08072	5.06655	4.4565	4.64043	4.96711
6929457	Dpp6	8.77871	8.05205	7.49109	6.44186	7.89848
6929510	Insig1	9.5073	8.91276	7.93981	7.05118	8.17736
6929550	Rnf32	4.72679	3.61834	3.54414	3.17369	3.61834
6929632	Cenpa	3.42523	3.8786	4.62127	5.49708	4.13116
6929644	Dpysl5	7.19767	5.9821	5.9821	5.47616	5.9821
6929647	Mapre3	8.72187	8.1352	7.82864	7.05239	7.992
6929653	Emilin1	4.73847	4.55119	5.11198	6.28226	5.77262
6929660	Preb	5.2402	4.92338	4.25198	3.83974	4.61845
6929816	Tacc3	4.00305	4.30171	5.34559	5.60463	4.54541
6929828	Nat8l	9.66217	8.9753	7.6843	6.6421	8.15962
6929849	Sh3bp2	4.41733	4.94957	5.26272	6.06722	5.4119
6929919	Ablim2	7.92213	7.20233	6.62632	6.45657	7.46201
6929995	Ppp2r2c	9.08436	8.6151	7.97343	6.94461	8.20247
6930022	Crmp1	7.18234	6.6618	6.4261	5.4446	6.41968
6930371	Bst1	3.84247	5.01941	5.64194	6.52728	4.76209
6930838	Pi4k2b	3.36604	4.01139	4.03131	5.14055	4.03131
6931181	Pgm1	5.98719	7.12946	7.05257	7.41905	6.68163
6931227	Fam114a1	5.01852	5.25467	5.81583	7.61937	7.06476
6931355	Uchl1	9.97202	9.47992	9.28132	8.25284	9.11208
6931603	Slc10a4	5.8144	5.31431	4.50793	3.93433	5.18557
6931961	Lphn3	8.57969	7.91737	7.51858	7.12486	7.91737
6932224	Rufy3	8.61446	8.11638	7.4798	6.70157	7.85514
6932368	Pf4	3.76753	4.54591	6.54604	6.18547	4.06659
6932409	Parm1	7.60147	6.76361	6.55833	6.09323	6.95803
6932517	Sept11	7.4203	8.11394	8.37312	9.06799	8.63609
6932930	Cds1	7.7412	6.83938	6.04323	5.2252	6.5892
6933065	Ibsp	3.03828	3.15115	5.85138	7.0129	4.46851
6933447	Galnt9	7.17787	6.6105	5.7627	5.47027	6.26551
6933602	Mvk	7.46072	6.64327	6.45725	5.78539	6.33558
6933697	Cit	7.65316	6.54767	6.34358	5.71868	6.50185
6933800	Nos1	5.75547	5.03491	4.79207	4.35586	5.36252
6933812	Tesc	6.10078	5.28234	5.05482	4.42645	5.27183
6934024	Gm15800	7.91502	6.98938	6.47205	6.10499	6.87873
6934119	Hvcn1	3.87347	3.81024	4.81893	7.03371	5.9688
6934130	Arpc3	7.25273	7.68881	8.17472	8.6811	7.82443
6934162	P2rx7	6.09979	5.96907	7.18864	7.9408	7.73707
6934164	P2rx4	6.78479	6.78358	7.65498	9.47677	8.38264
6934401	Aacs	7.4706	6.50148	6.17353	5.78583	6.20588
6934933	Rhbdd2	8.37568	7.73477	7.63603	7.00962	7.87678
6935059	Ache	8.36775	7.32383	6.57122	5.31203	7.04031
6935060	Ufsp1	6.39999	5.89891	5.18929	4.98428	5.70544
6935073	Actl6b	7.15548	6.2089	5.71183	5.03789	6.13329
6935150	Fam20c	6.76095	6.14972	6.95594	8.30622	7.43241
6935235	Elfn1	7.6012	6.73593	6.73593	5.99272	6.39165
6935534	Wasf3	8.33412	7.45106	7.27994	6.14924	7.39235
6935630	Mtus2	5.97084	4.95173	4.22715	4.31268	4.96882
6935701	Alox5ap	5.00768	6.20376	8.07555	8.55161	7.1514
6935927	Cyp51	9.58449	9.05238	7.94637	6.75031	7.66041
6936076	Adam22	8.63753	7.72336	7.23426	6.67135	7.75091
6936082	Dbf4	3.52209	4.02616	4.49777	5.76936	3.94312
6936088	Rundc3b	6.63913	5.95163	5.36163	5.1627	5.67315
6936719	Kcnh2	6.84408	5.95974	5.51234	4.49483	5.60389
6936750	Smarcd3	6.80537	6.06779	5.66557	5.19199	6.06779
6936791	5031410I06Rik	6.33263	5.45526	5.73638	4.48665	6.25914
6937061	Slc30a3	7.5465	6.91347	6.33479	5.54672	6.53464
6937084	Fndc4	7.95216	8.52559	7.70425	6.27783	7.16742
6937438	Htra3	5.26411	4.87822	5.57162	7.08179	6.80093
6937512	Man2b2	7.05207	6.52237	7.35296	8.50442	8.21095
6937585	Nsg1	9.4306	8.91088	8.46923	7.41618	8.56982
6938093	Ppargc1a	8.7556	7.77446	7.06826	6.44753	8.08593
6938171	Lgi2	8.23789	7.31966	6.43547	5.72959	7.14617
6938631	Rell1	6.27965	6.95092	7.1056	7.70991	7.57519
6938678	Tlr1	3.80309	4.73789	5.16332	6.14371	5.47036
6938679	Tlr6	3.47802	4.41543	4.41543	5.21006	4.5723
6939005	Gabra2	9.63903	8.81274	8.81902	8.15456	8.88397
6939077	Tec	3.741	4.4004	5.57343	6.5762	6.27323
6939358	Igfbp7	8.43021	9.63027	9.87981	11.0163	10.9603
6939604	Epha5	6.9421	5.9771	5.64537	5.52653	6.18371
6940236	Antxr2	3.78396	4.68403	5.61048	7.02323	6.82073
6940333	Tmem150c	8.2693	7.33555	6.8504	5.8095	7.2296
6940358	Plac8	2.76232	3.21372	3.90264	5.53055	4.06141
6940363	Hpse	3.80074	3.93194	5.82615	9.47727	7.65287
6940534	Mapk10	5.14814	4.15174	4.11076	3.6186	4.34364
6940535	Mapk10	10.9457	10.354	9.66023	8.41314	10.0651
6940928	Cplx1	10.5747	9.95853	9.29256	7.76344	9.50567
6941128	Asphd2	6.33533	5.38732	5.14795	4.40285	5.38732
6941130	Sez6l	7.19555	7.2736	6.68135	5.56875	6.2919
6941157	Sgsm1	6.77311	6.14438	5.85786	4.52213	5.83806
6941173	Cmklr1	5.53732	5.31783	6.5691	8.01944	6.74772
6941183	Selplg	6.34413	5.11024	6.46252	7.69092	6.88006
6941189	Svop	6.11511	5.175	5.05004	4.52052	5.13026
6941266	Cabp1	7.54039	7.00325	6.65794	5.6695	6.49598
6941423	Rfc5	4.63641	4.49823	5.75178	6.16597	5.25796
6941645	Dtx1	7.72998	6.92749	6.83226	6.27746	6.92749
6941661	Rph3a	9.89123	9.28552	8.47274	6.93161	8.62032
6941780	Rhof	6.41803	5.68746	5.01897	5.04644	5.38568
6941857	Abcb9	6.52077	5.63487	5.31948	4.71206	5.60705
6941883	Rilpl2	5.07205	4.49641	5.41794	7.3995	5.41794
6941913	Ccdc92	7.28687	7.14659	6.84608	5.6716	6.58606
6942192	Gusb	5.24778	5.43354	7.43475	9.33661	7.57896
6942376	Ncf1	5.17437	5.77492	8.10956	8.66259	7.51374
6942379	Limk1	9.16884	8.49326	7.72565	7.13936	8.1024
6942380	Eln	5.06883	4.65065	5.00033	8.26009	6.89949
6942558	Pcolce	5.39478	4.62427	5.10568	8.12637	8.44599
6942579	Pilra	3.25606	3.99079	4.20901	4.65513	4.21016
6942655	Prkar1b	10.018	9.71007	9.12403	7.88836	9.26845
6942973	Tmem130	9.32577	8.46005	7.75279	5.99747	8.19037
6943142	Flt3	5.45275	4.21151	4.20346	3.66628	4.34432
6943230	Katnal1	8.09073	7.81733	7.13158	6.72444	7.56915
6943310	Hsph1	8.81756	8.58259	8.02919	7.38265	8.07869
6943476	Rbm47	3.48145	4.31338	5.13196	6.76462	5.37126
6943818	Col1a2	6.80829	6.03152	8.18295	10.5655	10.4337
6943862	Ppp1r9a	7.01559	6.29513	5.92756	5.61786	6.4101
6943889	Dync1i1	7.59462	6.87396	6.06555	4.44428	6.45858
6943974	Tac1	6.75246	7.73041	7.2375	5.29639	6.34709
6944039	Nxph1	6.69801	5.63757	5.39694	4.96896	5.69582
6944293	Mdfic	4.14377	5.3319	6.83226	7.83842	7.15237
6944372	Cav1	7.32293	8.36785	8.56093	8.88314	8.53536
6944997	Calu	7.89683	8.61011	8.90011	9.69077	9.06677
6945011	Irf5	4.45173	4.98922	5.75923	6.59513	5.99634
6945066	Fam40b	5.33405	4.07823	3.83039	3.48477	4.07823
6945335	Cald1	6.35772	6.64684	7.40557	8.74205	8.26047
6945339	Tmem140	3.49462	3.85048	4.08834	5.94352	5.32095
6945419	Chrm2	9.17188	8.05568	7.15864	5.68844	8.00468
6945584	Tbxas1	3.79438	3.92546	5.45877	7.16016	5.57906
6945664	Gm5567	8.32109	7.34473	6.74563	5.88826	7.03217
6945824	Olfr444	2.0822	2.30171	3.08812	3.78353	1.65355
6945831	Olfr441	2.05972	2.55246	3.51493	5.35031	2.06424
6946004	Atp6v0e2	9.20195	8.68404	8.24112	7.83	8.59131
6946018	AI854703	5.34367	4.74809	4.34613	3.96081	4.64667
6946028	Gimap4	2.99528	3.46189	4.23733	4.41097	4.1429
6946038	Tmem176a	7.01067	6.60321	7.47466	8.42295	8.89876
6946119	Npy	6.7148	7.27566	7.28176	8.05287	7.20617
6946406	Aqp1	3.87788	4.70982	4.54368	5.34159	5.99468
6946412	Adcyap1r1	8.43488	7.82294	7.29718	6.74002	7.98941
6946475	Fkbp9	6.12837	5.71887	6.58932	7.82492	8.007
6946554	Abcg2	5.411	5.91685	6.38892	6.94486	7.08905
6946558	Herc3	7.63626	6.54837	6.19445	5.54424	6.56018
6946778	Mad2l1	5.10998	5.05629	6.49121	7.26605	5.51761
6946945	Reep1	8.0164	7.45382	7.14806	6.22657	7.1986
6946971	Tmem150a	5.44313	5.42321	5.91732	6.91588	6.69138
6946993	Capg	4.42302	5.5922	7.10195	8.10318	6.57085
6947400	Mob1a	6.73191	7.43757	8.1397	9.10099	8.20908
6947401	Mob1a	3.09131	3.75362	3.69109	5.19288	4.12649
6947586	Add2	7.61397	7.29561	6.94193	5.71109	6.94193
6947985	Hdac11	8.21042	7.4183	7.14954	6.39758	7.57489
6947987	Fbln2	4.9605	5.77321	7.85375	8.19132	6.57516
6948773	Cntn6	5.31525	4.1132	3.62664	3.68715	4.19381
6948878	Lrrn1	10.1851	9.36542	9.00628	8.3975	8.96556
6948918	Edem1	5.31627	5.78319	7.17248	8.11122	6.53216
6949075	Cpne9	6.36021	5.18823	4.74978	4.66901	5.18823
6949152	Slc6a11	10.2645	9.38777	8.00197	7.66391	9.1748
6949153	Slc6a1	9.61541	8.96742	8.19377	7.51954	8.86341
6949191	Syn2	8.79644	7.91737	7.55697	6.69861	7.91737
6949367	Zfp239	5.95025	5.463	4.92506	4.34504	5.3056
6949586	Tuba8	5.70772	4.91224	4.79147	4.07165	4.91224
6949694	Mfap5	4.0094	5.20525	6.29431	9.4939	8.35927
6949717	Necap1	9.63734	9.047	8.62252	8.06591	8.89829
6949722	Clec4a1	2.75315	3.27917	3.4643	4.4303	3.50792
6949727	Clec4a3	2.85324	3.19516	4.08278	5.46479	4.71359
6949814	Cdca3	3.56071	3.69347	5.90986	6.16057	4.08028
6949853	Mrpl51	5.98366	5.13891	3.21144	3.68221	5.27636
6949856	Vamp1	10.578	10.0811	9.32188	7.96444	9.76016
6950072	Nrip2	7.02276	6.12979	5.55729	5.05042	6.33751
6950103	Clec2i	2.6069	2.86213	3.7097	4.70001	3.10363
6950125	Clec2d	5.36825	6.01181	6.59198	8.23819	7.7689
6950137	Clec12a	2.42949	3.09305	4.73838	6.77552	5.59159
6950160	Gabarapl1	9.07633	8.75112	8.50519	7.74983	8.65395
6950397	8430419L09Rik	8.0988	7.32149	6.83226	6.41394	7.15791
6950558	Dera	4.93868	5.40438	5.49256	6.26593	5.49256
6950582	Mgst1	6.67025	7.33639	7.45941	8.77682	8.16802
6951118	Ppfibp1	5.63566	5.97142	6.60813	7.22954	6.72112
6951276	Bicd1	6.77541	6.05473	5.53371	4.85457	6.00208
6951302	Tfpi2	4.38355	5.58821	6.26804	7.00604	5.71801
6951401	Pon3	5.17726	5.06884	6.77212	8.32603	7.2802
6951525	Asns	8.58597	8.42311	7.96222	6.73111	7.71595
6951882	Tfec	3.11463	3.81825	3.95043	5.02048	3.80158
6952194	Tmem229a	6.72725	5.79427	5.83379	5.23889	6.14851
6952227	Gpr37	9.42969	8.27486	7.93016	7.27108	8.41469
6952298	Lrrc4	5.35831	4.11745	3.86533	3.5346	4.43228
6952523	Plxna4	7.45755	6.95259	6.47573	6.01864	6.99492
6952680	Fam180a	4.20696	3.85526	3.73974	5.95617	6.88069
6952873	Zc3hav1	4.08718	5.17967	5.46468	6.30996	5.82239
6952926	Parp12	4.76471	5.91384	6.22568	6.95702	6.29984
6953126	Fam131b	6.90429	6.44588	6.51649	5.28194	6.12872
6953587	Skap2	6.27628	6.7825	7.07407	8.07828	7.23724
6953762	Scrn1	9.46062	8.92272	8.58843	8.03619	8.94197
6953763	Fkbp14	5.39774	5.43531	5.54749	7.01204	6.57188
6953920	Ppm1k	6.15372	5.46358	5.18985	4.65228	5.85015
6953993	Nap1l5	10.2726	9.99569	9.37669	8.07766	9.6282
6954000	Fam13a	6.88983	5.64499	5.29939	5.03339	6.07456
6954035	Snca	7.01484	6.00134	5.88806	4.86683	6.04974
6954269	Hpgds	4.91816	5.44284	7.55472	9.03079	8.00297
6954350	Vmn1r35	1.4433	2.21614	2.40085	2.98234	1.3924
6954385	Gadd45a	6.21916	7.51531	7.83983	7.65814	7.19479
6954619	Vamp8	4.4992	4.9301	6.40382	6.96137	6.52701
6954982	Hk2	4.08	5.37082	5.83098	6.18371	5.46474
6955019	Wdr54	6.22025	5.3636	5.07281	4.6917	5.49554
6955035	Actg2	2.71544	2.91722	2.87361	5.52236	3.12597
6955171	Cml1	2.57211	2.97275	3.12966	4.14743	2.38752
6955228	Anxa4	5.30227	6.26923	8.03686	9.64174	8.35863
6955268	Arhgap25	4.70369	4.97454	6.40855	8.22792	7.22552
6955347	Sec61a1	8.05014	9.01971	9.01869	9.51312	8.95541
6955377	Podxl2	8.17788	7.65069	7.02685	6.65979	7.72056
6955653	Magi1	7.69595	6.97273	6.89527	6.19256	7.08829
6956045	Cntn3	4.7015	3.99288	3.38909	3.23986	3.83039
6956507	Srgap3	7.72655	6.62564	6.15391	5.86304	6.92323
6956509	Srgap3	8.10576	7.22975	6.68347	6.06676	7.25844
6956537	Lhfpl4	6.56707	6.01976	5.98953	5.23668	5.98953
6956592	Atp2b2	9.45189	8.75806	7.67653	6.5703	8.19332
6956748	Plxnd1	5.52005	5.81021	6.9261	7.93428	7.19525
6956891	Zfp248	5.67772	4.90425	4.40895	4.20271	4.99544
6957033	Rimklb	7.37626	6.24156	6.57757	5.95224	7.17361
6957051	Slc2a3	7.53541	7.1345	6.47082	5.95427	6.44833
6957107	Clstn3	8.95215	8.42738	7.42272	6.1315	7.80941
6957122	Ptpn6	4.6059	5.61728	7.12128	8.32921	7.34077
6957125	Eno2	10.2312	9.69655	8.99534	7.75959	9.18331
6957140	Gpr162	7.51082	6.62281	6.11756	5.66548	6.5408
6957141	Cd4	3.17163	3.17697	3.11101	4.62508	4.20841
6957185	Cd9	8.41522	9.33792	9.49321	10.329	9.5983
6957246	Kcna1	8.61145	8.11244	7.88086	6.97896	8.00153
6957352	BC048546	6.48659	5.44708	5.29503	3.16672	5.40838
6957412	Olr1	2.68615	3.41164	3.56107	4.71206	3.52365
6957715	Grin2b	7.02667	5.80347	4.9809	4.48149	5.63779
6957744	Plbd1	3.49012	4.48454	5.32177	7.01013	5.66489
6957763	Arhgdib	5.19577	6.09116	7.90177	9.07459	8.08293
6957844	Lmo3	6.79441	5.71165	5.38335	4.84333	5.82761
6958078	St8sia1	7.42629	6.16022	6.09148	5.69386	6.32671
6958407	Tmtc1	7.68163	6.79927	6.0648	6.16202	7.84719
6958439	Dennd5b	7.23442	6.39273	6.10307	5.70076	6.39273
6958905	Slc1a5	4.21774	5.13036	5.13036	5.69347	6.0307
6958927	Ccdc8	6.2656	5.31608	5.28481	4.50945	5.31608
6959000	Rtn2	7.40755	7.00922	6.69955	5.58115	6.67028
6959208	Tmem145	6.33076	5.41794	5.41794	4.67699	5.41794
6959236	Tgfb1	5.37618	6.53646	7.74761	8.85807	7.75295
6959317	Ttc9b	6.62807	5.68661	5.35771	4.87111	5.55954
6959584	Tyrobp	5.6283	6.54084	8.76263	10.2795	8.75137
6959793	Cebpa	5.7338	5.98286	6.29436	7.13087	6.48452
6960061	Vstm2b	6.94073	6.24707	5.30559	5.18962	6.08801
6960266	Syt3	7.55942	6.61482	5.68094	5.02881	6.30434
6960270	Lrrc4b	8.41002	7.50319	7.46021	6.89946	7.56134
6960291	Kcnc3	7.46942	6.31918	5.73365	4.76912	5.87556
6960403	Car11	7.56039	6.60812	6.32106	6.22295	7.12263
6960456	Kcnc1	7.7572	6.87565	5.63788	4.59687	6.46901
6960457	Kcnc1	4.87193	4.23096	3.86549	2.9968	3.86549
6960516	Tmem86a	6.0974	5.59038	7.14124	8.89645	8.4588
6960627	Slc6a5	9.15576	8.48012	7.3078	6.13273	7.84003
6960692	Slc17a6	8.7113	8.20664	7.31916	5.71423	7.62742
6961010	Ndn	9.18243	8.7259	8.36027	7.65636	8.63764
6961110	Apba2	7.88385	6.99164	6.51091	5.92874	6.84269
6961987	Prc1	3.12053	4.22085	6.72812	6.92132	4.60424
6962094	Tm6sf1	6.90067	6.39449	7.19551	8.55874	7.36856
6962107	Sh3gl3	7.74766	7.2254	6.64221	6.08274	6.8198
6962343	Nox4	2.8655	3.24433	3.07018	4.44226	3.40356
6962467	Me3	7.12321	6.13353	5.68264	5.31807	6.56299
6962577	Rab30	6.8478	5.78137	5.39857	5.23972	6.59281
6962580	Prcp	7.22717	6.7138	7.46915	8.79618	8.23061
6962736	Odz4	7.19906	6.02828	5.69111	5.29197	6.02828
6962779	Pak1	10.148	9.65219	8.88429	8.41422	9.37134
6962873	Mtap6	6.74104	6.52033	6.12204	5.13956	6.06515
6962925	Pgm2l1	5.87355	5.09988	4.53048	4.32626	4.85843
6962935	Ucp2	7.62491	8.43084	9.59399	10.4437	9.62297
6963003	Stard10	8.73502	8.31677	8.06423	7.40557	8.18279
6963004	Arap1	5.84165	5.90156	6.41446	7.26132	6.81456
6963130	Olfr641	1.73541	2.61305	3.0202	3.6671	2.04935
6963197	Cckbr	6.08374	5.30434	5.22474	4.60406	5.22474
6963252	Olfr713	2.81797	3.61834	3.61834	4.3563	3.61834
6963264	Syt9	5.698	4.98052	4.88948	4.31865	5.08704
6963384	D930014E17Rik	4.63588	5.20527	5.60782	6.72176	5.64629
6963623	Calcb	6.36489	5.83662	4.25242	3.83631	5.31776
6963744	Nucb2	6.11502	6.34732	6.6612	7.55386	6.89354
6963856	6330503K22Rik	7.29988	6.25198	5.68613	5.40891	6.36021
6964033	Plk1	3.97938	4.24057	5.88828	6.81916	4.81434
6964250	Fam57b	7.87797	6.89886	5.98607	5.39843	6.33249
6964259	Sez6l2	9.5376	9.06967	8.5747	7.3167	8.64689
6964382	Itgax	3.42126	3.87878	4.37453	8.13434	7.51992
6964394	Tgfb1i1	5.73549	6.26083	6.13195	7.20555	7.15006
6965233	Brsk2	7.88955	7.10171	6.62202	5.68405	6.918
6965268	Lsp1	5.23019	5.42004	6.6047	8.51788	7.13777
6965348	Dhcr7	8.60878	7.649	7.16	7.19248	7.31806
6965597	Gltscr2	4.50967	5.31729	4.60106	5.84706	5.09247
6965598	Ehd2	4.87954	6.06187	6.06187	6.75188	6.64999
6965901	Atp1a3	11.1733	10.6242	10.0828	9.217	10.199
6965970	Tmem91	7.18389	6.61985	6.09731	5.03302	6.30678
6965982	Axl	7.69168	7.94664	8.15158	9.14912	9.31804
6966284	Aplp1	10.8123	10.403	9.98903	9.32876	10.0445
6966322	Cd22	3.56025	4.16001	4.31513	6.14147	5.8157
6966324	Mag	10.794	10.5959	10.2957	9.18789	9.72433
6966338	Fxyd7	8.90862	8.13297	7.7046	7.29411	8.25345
6966808	Cd33	5.92323	6.24621	7.5604	8.90077	8.21116
6966857	Clec11a	4.27454	4.70437	4.02973	5.80095	6.07332
6966934	Rcn3	5.25489	5.26154	6.098	8.76153	8.42243
6966935	Fcgrt	8.15889	6.9624	7.72559	9.65877	9.94083
6966960	Cd37	5.52684	5.45109	6.75731	8.18173	7.41448
6966967	Ppfia3	6.34964	5.72043	5.21192	4.16577	5.36069
6966972	Lin7b	7.29335	6.15709	5.98385	5.59722	6.15709
6967026	Kcnj11	4.72541	3.54061	3.27061	3.008	3.66055
6967109	Ptpn5	7.1015	6.93448	6.28338	5.29624	6.14548
6967211	E2f8	4.31567	4.39956	5.10639	5.69089	4.69396
6967542	Nipa1	8.14276	7.26672	6.73133	6.39421	7.16399
6967584	Gabrg3	6.40088	6.32447	5.54569	4.6464	5.70973
6967593	Gabra5	8.82271	7.65979	6.56539	4.97962	7.46092
6967726	Snrpn	10.7854	10.2443	9.64034	8.41324	9.89451
6967837	Chrna7	6.71332	5.97169	5.10966	4.99876	5.73438
6967908	Fam189a1	6.29943	5.2468	4.58549	4.59384	5.12941
6968126	Arrdc4	4.88506	6.19565	6.61923	6.50902	6.04359
6968426	Slco3a1	8.65681	8.0974	7.49564	6.96439	7.86409
6968453	Sv2b	8.16445	7.03832	6.31476	5.10263	6.86922
6968643	Ntrk3	7.84709	7.14995	6.67894	6.51112	7.65462
6968683	Mfge8	6.993	6.49746	7.08694	8.71197	7.26484
6968735	Anpep	4.37013	4.07559	6.32106	9.52641	8.56026
6968781	Furin	6.36082	7.25351	7.77883	8.24143	7.52136
6968799	Iqgap1	5.74031	6.99256	8.17723	9.60961	8.24885
[truncated: 527 more rows]
