# Supplementary material for: Aberrant LncRNA Expression Profile in a Contusion Spinal Cord Injury Mouse Model
Source: Biomed Res Int. 2016 Sep 4;2016:9249401. doi: 10.1155/2016/9249401 (PMC5027055; doi:10.1155/2016/9249401)
Supplement: Supplementary file 1 — S1 license pdf: The License Awarded by Soochow University. Table S1: Differential Expression of LncRNAs and Annotation. Table S2: Differential Expression of mRNAs and Annotation. Table S3: mRNAs STC Increase or Decrease. Table S4: LncRNAs STC Increase or Decrease. Table S5: The Significant GO Terms for Differentially Expressed. Table S6: The Significant Pathways of Differentially Expressed Genes. Table S7: The Quantity of the mRNA and LncRNA Network. S1 Fig: The dynamic network between LncRNAs and mRNAs. In this map, the circles with a green line represented LncRNAs, and the other circles represented mRNA. The lines between circles indicated regulation between these genes. The size of the circles indicated the ability of interaction between the genes. This ability was quantified by the degree, which was defined as the connective number between genes. The color was in accordance with the results of the clustering analysis, which was defined as the K-core. The same K-core indicated the similarity and correlation of function between genes. The red color representing the maximal K-core indicated the strongest regulation level in this network. [file 9249401.f1.zip › S3 Table.xls]

## Sheet: the description of sheet 1
The name of table	Header	The description of header
genemodelfile	Probe Set ID	Probe ID
	Gene Symbol	Gene name corresponding NCBI GenBank
	od	The standardization of the contrl group logical expression value
	1d	The standardization of the 1 day post-injured group logical expression value
	3d	The standardization of the 3 day post-injured logical expression value
	1w	The standardization of the 1 week post-injured logical expression value
	3w	The standardization of the 3 weeks logical expression value
	Profiles	Trend profile ID

## Sheet: sheet 1
Probe Set ID	Gene Symbol	od	1d	3d	1w	3w	modelnumber
6774311	Unc5b	0	-0.11303	-0.227572	-0.338675	-0.309378	2
7011907	Nsdhl	0	-0.0582821	-0.165768	-0.264111	-0.231042	2
6749034	Gpr45	0	-0.451762	-0.571447	-0.73114	-0.506098	3
6749346	Tmeff2	0	-0.112887	-0.237485	-0.306832	-0.167026	3
6749933	Adam23	0	-0.113992	-0.252385	-0.415373	-0.172073	3
6752222	Cdh7	0	-0.267294	-0.53821	-0.807673	-0.368629	3
6756419	Kcnh1	0	-0.130085	-0.267566	-0.452486	-0.199803	3
6763903	Mgst3	0	-0.0848642	-0.199027	-0.253492	-0.1656	3
6765153	Smyd2	0	-0.0735852	-0.192655	-0.289651	-0.143922	3
6768843	Gnaz	0	-0.130211	-0.197647	-0.291616	-0.158461	3
6768928	Lss	0	-0.16298	-0.425617	-0.59466	-0.374055	3
6769139	Hcn2	0	-0.0903409	-0.148492	-0.33574	-0.180425	3
6769996	Ube2n	0	-0.152505	-0.361592	-0.573912	-0.257878	3
6775441	Atcay	0	-0.170039	-0.321553	-0.451835	-0.22947	3
6777956	Nxph4	0	-0.153085	-0.247636	-0.545398	-0.276526	3
6780771	Mapk9	0	-0.0912262	-0.15557	-0.246177	-0.112702	3
6782002	Kcnab3	0	-0.236864	-0.453373	-0.672085	-0.325752	3
6782093	Dlg4	0	-0.0988746	-0.198823	-0.336791	-0.156356	3
6783297	Trim37	0	-0.0934141	-0.196135	-0.340907	-0.131905	3
6787743	Cyfip2	0	-0.0918173	-0.154751	-0.228148	-0.104228	3
6789066	Map2k4	0	-0.0944918	-0.160791	-0.229941	-0.122661	3
6790664	Dgke	0	-0.160465	-0.26366	-0.423429	-0.210582	3
6792527	Ube2o	0	-0.132238	-0.210989	-0.325494	-0.17088	3
6792931	Kif3c	0	-0.100924	-0.177693	-0.286174	-0.135941	3
6792965	Dnajc27	0	-0.179032	-0.379226	-0.603847	-0.230343	3
6797978	Dlk1	0	-0.0843312	-0.181317	-0.319417	-0.165271	3
6798180	Traf3	0	-0.187131	-0.296445	-0.377465	-0.221496	3
6799857	Gpr22	0	-0.188522	-0.393059	-0.532316	-0.274473	3
6801636	Rtn1	0	-0.104716	-0.169841	-0.236691	-0.117855	3
6802180	Slc8a3	0	-0.151334	-0.303821	-0.493276	-0.190994	3
6802197	Map3k9	0	-0.27371	-0.397601	-0.567729	-0.357771	3
6803862	Xrcc3	0	-0.127145	-0.159044	-0.301627	-0.196599	3
6804900	Gng4	0	-0.0437599	-0.231652	-0.300806	-0.177008	3
6808237	Tppp	0	-0.0533275	-0.142104	-0.241331	-0.11838	3
6810255	Ankrd55	0	-0.140586	-0.379224	-0.606738	-0.246588	3
6815305	Hmgcr	0	-0.126307	-0.30198	-0.42862	-0.281722	3
6815739	Rgs7bp	0	-0.108611	-0.23575	-0.342186	-0.137856	3
6817229	Nkiras1	0	-0.130644	-0.301324	-0.522362	-0.183032	3
6820083	Lgi3	0	-0.105734	-0.227453	-0.36955	-0.17486	3
6823284	Kcnma1	0	-0.0991205	-0.217736	-0.342314	-0.159076	3
6824779	Slc22a17	0	-0.105305	-0.210066	-0.293275	-0.137403	3
6825132	Atp8a2	0	-0.204548	-0.39319	-0.638383	-0.259356	3
6833146	Prph	0	-0.0778843	-0.26016	-0.33492	-0.163624	3
6833286	Scn8a	0	-0.188504	-0.417004	-0.704435	-0.268533	3
6836699	Lynx1	0	-0.104304	-0.241326	-0.403599	-0.178841	3
6837041	Elfn2	0	-0.185215	-0.29666	-0.359184	-0.250665	3
6837335	Pppde2	0	-0.0932574	-0.16891	-0.238341	-0.132055	3
6843889	Dexi	0	-0.0710693	-0.196447	-0.242867	-0.169056	3
6851897	Epb4.1l3	0	-0.0753024	-0.180995	-0.23831	-0.126537	3
6854273	Flywch1	0	-0.0727079	-0.19938	-0.341156	-0.17925	3
6855701	Ttbk1	0	-0.264797	-0.411057	-0.655753	-0.342798	3
6856133	Slc5a7	0	-0.216816	-0.4536	-0.664686	-0.31483	3
6862816	Neto1	0	-0.101391	-0.160885	-0.363557	-0.189824	3
6868032	Syt7	0	-0.225914	-0.372147	-0.570257	-0.288566	3
6871074	Tmem151a	0	-0.0703975	-0.160182	-0.272454	-0.161368	3
6871078	Klc2	0	-0.149997	-0.281107	-0.466769	-0.22062	3
6871181	Tm7sf2	0	-0.223853	-0.319298	-0.524571	-0.319298	3
6871265	Gpr137	0	-0.121012	-0.19292	-0.28275	-0.146614	3
6871386	Gng3	0	-0.094381	-0.212025	-0.332172	-0.135809	3
6872262	Pip5k1b	0	-0.230419	-0.448239	-0.61226	-0.291935	3
6876944	Lypd6b	0	-0.193401	-0.294966	-0.421599	-0.239661	3
6878344	Osbpl6	0	-0.155019	-0.398174	-0.604607	-0.225514	3
6882538	Acss2	0	-0.214318	-0.380948	-0.537557	-0.327273	3
6884129	Ss18l1	0	-0.130486	-0.221331	-0.308882	-0.153616	3
6886732	Cacnb4	0	-0.10617	-0.253665	-0.426787	-0.179756	3
6887703	Slc25a12	0	-0.0500442	-0.136176	-0.208159	-0.0868195	3
6891689	6330439K17Rik	0	-0.121102	-0.290119	-0.491841	-0.182785	3
6892090	Snph	0	-0.111298	-0.209017	-0.283803	-0.157612	3
6892143	Nrsn2	0	-0.159845	-0.35527	-0.613973	-0.227669	3
6893288	Atp9a	0	-0.0774539	-0.17387	-0.298845	-0.157446	3
6896431	Eif5a2	0	-0.118231	-0.213904	-0.383194	-0.175339	3
6898873	Fbxw7	0	-0.18532	-0.302023	-0.426333	-0.218112	3
6900082	Tspan2	0	-0.0365228	-0.159534	-0.204849	-0.130749	3
6901316	Elovl6	0	-0.160954	-0.376125	-0.487069	-0.273486	3
6906846	Chrnb2	0	-0.142438	-0.333256	-0.597693	-0.268358	3
6908031	Slc6a17	0	-0.176293	-0.337118	-0.548894	-0.231404	3
6908551	D3Bwg0562e	0	-0.125635	-0.288892	-0.428785	-0.164662	3
6912565	Cnr1	0	-0.167263	-0.303777	-0.425346	-0.199718	3
6913774	Palm2	0	-0.0763791	-0.271628	-0.394094	-0.211153	3
6916504	Atpaf1	0	-0.158448	-0.343277	-0.58039	-0.222839	3
6917277	Fndc5	0	-0.157488	-0.337377	-0.524701	-0.219094	3
6925247	Maneal	0	-0.182156	-0.314428	-0.456197	-0.25066	3
6925904	Trnp1	0	-0.126226	-0.234584	-0.409128	-0.175414	3
6927145	Kcnab2	0	-0.0956758	-0.215386	-0.345787	-0.188218	3
6929510	Insig1	0	-0.0931639	-0.25993	-0.431171	-0.2174	3
6929660	Preb	0	-0.0899714	-0.301487	-0.448612	-0.182212	3
6932930	Cds1	0	-0.178691	-0.357236	-0.567071	-0.232452	3
6934401	Aacs	0	-0.200454	-0.275129	-0.368699	-0.267588	3
6936088	Rundc3b	0	-0.157709	-0.308323	-0.362869	-0.226844	3
6937061	Slc30a3	0	-0.126398	-0.252511	-0.444173	-0.207701	3
6941266	Cabp1	0	-0.106614	-0.179563	-0.411418	-0.215093	3
6942379	Limk1	0	-0.110421	-0.247083	-0.360945	-0.178389	3
6945664	Gm5567	0	-0.180063	-0.302819	-0.498933	-0.242803	3
6946004	Atp6v0e2	0	-0.0835737	-0.1591	-0.232928	-0.0990613	3
6946018	AI854703	0	-0.170483	-0.298099	-0.432034	-0.201632	3
6948878	Lrrn1	0	-0.121044	-0.177456	-0.278429	-0.183994	3
6949367	Zfp239	0	-0.123257	-0.272809	-0.453579	-0.165433	3
6949717	Necap1	0	-0.0911946	-0.160525	-0.256798	-0.115107	3
6950397	8430419L09Rik	0	-0.14557	-0.245345	-0.336496	-0.178169	3
6957051	Slc2a3	0	-0.0788745	-0.219738	-0.339763	-0.224762	3
6960266	Syt3	0	-0.192573	-0.412146	-0.58806	-0.261929	3
6960291	Kcnc3	0	-0.241259	-0.381541	-0.647272	-0.34627	3
6961110	Apba2	0	-0.173269	-0.276041	-0.411176	-0.204337	3
6962107	Sh3gl3	0	-0.100682	-0.222097	-0.349039	-0.184031	3
6962779	Pak1	0	-0.0722713	-0.191871	-0.270299	-0.114873	3
6964250	Fam57b	0	-0.191466	-0.396214	-0.545283	-0.31505	3
6965901	Atp1a3	0	-0.0726931	-0.148165	-0.277685	-0.131622	3
6966284	Aplp1	0	-0.0556727	-0.11425	-0.21291	-0.106261	3
6968426	Slco3a1	0	-0.0963752	-0.207784	-0.313837	-0.138555	3
6972750	Peg3	0	-0.0956214	-0.188792	-0.279378	-0.11912	3
6979704	Tubb3	0	-0.138917	-0.233879	-0.447297	-0.261326	3
6980289	Fam155a	0	-0.111213	-0.217324	-0.419766	-0.191177	3
6981387	Unc5d	0	-0.132421	-0.274804	-0.459169	-0.192112	3
6981870	Mtmr7	0	-0.131019	-0.245022	-0.364961	-0.176622	3
6983277	Unc13a	0	-0.16628	-0.427935	-0.558133	-0.313984	3
6985877	Fbxo31	0	-0.103854	-0.202475	-0.318302	-0.17942	3
6986056	Pgbd5	0	-0.115727	-0.197656	-0.411047	-0.206203	3
6989556	Parp6	0	-0.167252	-0.277237	-0.386211	-0.194026	3
6993854	Elavl3	0	-0.0780373	-0.11841	-0.285284	-0.163606	3
6996038	Bbs4	0	-0.0832761	-0.205517	-0.344883	-0.142893	3
6997077	Fbxo9	0	-0.0765264	-0.222888	-0.342306	-0.157377	3
6997398	Elovl4	0	-0.0877735	-0.284345	-0.409756	-0.184189	3
6999522	Cck	0	-0.125352	-0.280638	-0.38795	-0.176055	3
7005797	Hmgcs1	0	-0.0833673	-0.205627	-0.391118	-0.244047	3
7009941	Tspan7	0	-0.126381	-0.320366	-0.433134	-0.206538	3
7013389	Klhl4	0	-0.17469	-0.391161	-0.531973	-0.267202	3
7015988	Syn1	0	-0.0994141	-0.226352	-0.423166	-0.176597	3
7019615	Tceal5	0	-0.101178	-0.225064	-0.373766	-0.192865	3
6833176	Aqp6	0	-0.220168	-0.40924	-0.457279	-0.502108	5
6857433	Heatr5b	0	-0.350603	-0.492925	-0.503257	-0.451021	5
6861437	Htr4	0	-0.287208	-0.50287	-0.430663	-0.361713	5
6965348	Dhcr7	0	-0.170537	-0.26585	-0.259319	-0.234347	5
7011050	Rab33a	0	-0.116807	-0.479256	-0.342996	-0.310381	5
6796211	Fntb	0	-0.203587	-0.296542	-0.279093	-0.239863	5
6833468	Hoxc10	0	-0.112287	-0.29054	-0.200211	-0.199236	5
6750848	Sgpp2	0	-0.286233	-0.560888	-0.704297	-0.286233	6
6775146	Susd2	0	-0.295018	-0.483493	-0.48076	-0.116297	6
6777190	Lgr5	0	-0.361912	-0.528561	-0.434561	-0.352002	6
6780331	Gabrb2	0	-0.369321	-0.552171	-0.754141	-0.297876	6
6782679	Tlcd1	0	-0.316681	-0.445055	-0.459732	-0.27159	6
6794568	Dgkb	0	-0.282507	-0.472756	-0.616285	-0.184063	6
6836260	Adcy8	0	-0.352018	-0.506386	-0.541073	-0.14929	6
6842587	Chodl	0	-0.482663	-0.897223	-0.871491	-0.417527	6
6846576	Epha6	0	-0.409643	-0.532098	-0.682033	-0.340626	6
6872646	Asah2	0	-0.285668	-0.39366	-0.415503	-0.171406	6
6877229	Kcnj3	0	-0.3033	-0.539591	-0.678898	-0.196291	6
6885425	Gm996	0	-0.360787	-0.50047	-0.567596	-0.287445	6
6887205	Kcnh7	0	-0.384088	-0.539076	-0.703161	-0.384088	6
6894253	Chrna4	0	-0.314635	-0.54055	-0.738809	-0.300142	6
6901119	Ndst4	0	-0.460209	-0.810467	-0.862457	-0.460209	6
6906042	Slitrk3	0	-0.31644	-0.471614	-0.603949	-0.300097	6
6936140	Grm3	0	-0.408029	-0.536244	-0.644142	-0.213798	6
6957304	Prmt8	0	-0.422153	-0.678597	-0.734086	-0.328668	6
6959800	Slc7a10	0	-0.371125	-0.442674	-0.583076	-0.273417	6
6969612	Thrsp	0	-0.312882	-0.432711	-0.45222	-0.210715	6
6970340	Olfr519	0	-0.627884	-0.910524	-0.852152	-0.604426	6
6997672	Ankrd34c	0	-0.547608	-0.903307	-0.881743	-0.537963	6
7011382	Ncrna00086	0	-0.407316	-0.483022	-0.588972	-0.380945	6
6748553	Arhgef4	0	-0.132438	-0.300071	-0.371219	-0.139471	6
6750314	Vwc2l	0	-0.382336	-0.462652	-0.561163	-0.372361	6
6750868	Acsl3	0	-0.202845	-0.266964	-0.275647	-0.146646	6
6751617	Olfr1411	0	-0.209527	-0.429197	-0.627644	-0.16993	6
6754526	Ankrd45	0	-0.269964	-0.379262	-0.467157	-0.152753	6
6754696	Slc19a2	0	-0.179499	-0.275712	-0.333435	-0.19048	6
6755856	Susd4	0	-0.188245	-0.380489	-0.569695	-0.202429	6
6757479	Bai3	0	-0.278274	-0.357504	-0.459027	-0.164947	6
6757750	Bend6	0	-0.154311	-0.398858	-0.436969	-0.154321	6
6758036	Creg2	0	-0.277863	-0.440365	-0.546774	-0.277863	6
6758958	Fam126b	0	-0.190776	-0.284643	-0.362938	-0.188162	6
6759391	D630023F18Rik	0	-0.343882	-0.408704	-0.514552	-0.277329	6
6759468	Lancl1	0	-0.115162	-0.210366	-0.285066	-0.128668	6
6761964	Tmem163	0	-0.0997286	-0.264183	-0.254591	-0.173113	6
6765533	Syne1	0	-0.215497	-0.368025	-0.548815	-0.161797	6
6766863	Echdc1	0	-0.176509	-0.301448	-0.281549	-0.174535	6
6771581	Tac2	0	-0.253805	-0.405405	-0.548211	-0.138545	6
6773802	Grik2	0	-0.116061	-0.248026	-0.349693	-0.116614	6
6776978	Zdhhc17	0	-0.14439	-0.251668	-0.327229	-0.113104	6
6782288	P2rx5	0	-0.241305	-0.347382	-0.466876	-0.241305	6
6783321	2014-09-04	0	-0.0961566	-0.177871	-0.21336	-0.0897971	6
6783838	Hoxb9	0	-0.107722	-0.256757	-0.318124	-0.144554	6
6783844	Hoxb5	0	-0.24971	-0.339011	-0.426734	-0.0809727	6
6784498	Mapt	0	-0.155305	-0.273638	-0.389263	-0.159689	6
6786914	Ccdc85a	0	-0.241501	-0.311349	-0.362276	-0.125822	6
6788064	Zfp454	0	-0.34057	-0.511515	-0.497778	-0.233604	6
6788741	Tom1l2	0	-0.112891	-0.197924	-0.264314	-0.0675605	6
6789268	Alox8	0	-0.23693	-0.365516	-0.460749	-0.227999	6
6789448	Camta2	0	-0.153285	-0.250367	-0.274716	-0.15604	6
6790547	Ppm1e	0	-0.253437	-0.460568	-0.559082	-0.253437	6
6791236	Stac2	0	-0.184714	-0.338652	-0.381406	-0.237079	6
6792822	Fasn	0	-0.145615	-0.241191	-0.248839	-0.144765	6
6793639	Ntsr2	0	-0.0909211	-0.241568	-0.28025	-0.0923912	6
6796299	Gphn	0	-0.152994	-0.219084	-0.290848	-0.157728	6
6796707	Ttll5	0	-0.144229	-0.240447	-0.323947	-0.165228	6
6800079	Tspan13	0	-0.0945933	-0.151929	-0.247963	-0.0193101	6
6803863	Ppp1r13b	0	-0.12729	-0.224565	-0.299935	-0.135214	6
6804497	Asb13	0	-0.104866	-0.313813	-0.341362	-0.147568	6
6807158	Cplx2	0	-0.166775	-0.318392	-0.368415	-0.204662	6
6807328	Fbxl21	0	-0.226764	-0.482504	-0.582965	-0.14508	6
6808876	Ssbp2	0	-0.146052	-0.209262	-0.240944	-0.0493287	6
6811776	Aldh5a1	0	-0.199339	-0.251267	-0.315605	-0.198257	6
6813518	Trpc7	0	-0.335748	-0.479758	-0.619019	-0.335748	6
6814128	Adcy2	0	-0.223171	-0.305833	-0.399042	-0.21306	6
6819591	Sacs	0	-0.273504	-0.431054	-0.492231	-0.285929	6
6819596	Sacs	0	-0.21226	-0.323879	-0.447413	-0.221876	6
6823041	Camk2g	0	-0.128948	-0.221373	-0.299595	-0.108578	6
6823690	Itih3	0	-0.105445	-0.402193	-0.361863	-0.138121	6
6823797	Chat	0	-0.265504	-0.408104	-0.490785	-0.275803	6
6824633	Sall2	0	-0.256105	-0.34019	-0.391198	-0.135175	6
6827410	Slitrk1	0	-0.217692	-0.388158	-0.568044	-0.202369	6
6827820	Dzip1	0	-0.160203	-0.284659	-0.325362	-0.143348	6
6828016	Nalcn	0	-0.229043	-0.382827	-0.480756	-0.11885	6
6829068	Cdh10	0	-0.255613	-0.337587	-0.343257	-0.214285	6
6829123	Cdh12	0	-0.278777	-0.602451	-0.749341	-0.39315	6
6830154	Trhr	0	-0.378446	-0.555222	-0.735542	-0.378446	6
6831990	Mgat3	0	-0.162118	-0.224177	-0.324167	-0.0966342	6
6832719	Cntn1	0	-0.105595	-0.194145	-0.219541	-0.0325414	6
6833061	AI836003	0	-0.193782	-0.381915	-0.398127	-0.218596	6
6835759	Enpp2	0	-0.134302	-0.204161	-0.205859	-0.103169	6
6836305	Kcnq3	0	-0.241761	-0.343535	-0.42213	-0.161068	6
6837447	Ttll1	0	-0.15107	-0.23257	-0.237287	-0.158821	6
6838171	Nell2	0	-0.155226	-0.274898	-0.405723	-0.14335	6
6838746	Map3k12	0	-0.229428	-0.308462	-0.362427	-0.197039	6
6839231	Abat	0	-0.0783679	-0.181833	-0.271875	-0.0660777	6
6839744	Aifm3	0	-0.195002	-0.252747	-0.384066	-0.0713168	6
6839943	Vwa5b2	0	-0.245989	-0.319344	-0.383128	-0.245989	6
6840357	Hrasls	0	-0.165323	-0.278025	-0.407216	-0.162103	6
6840516	Pigz	0	-0.263454	-0.369732	-0.326839	-0.12345	6
6840981	D930030D11Rik	0	-0.403017	-0.83979	-0.675463	-0.451857	6
6841862	Cpox	0	-0.16314	-0.23228	-0.28789	-0.147216	6
6842682	Ncam2	0	-0.120655	-0.195188	-0.247321	-0.140854	6
6843384	Ttc3	0	-0.0876877	-0.155082	-0.209371	-0.0859979	6
6843634	Adcy9	0	-0.229307	-0.460972	-0.367529	-0.154766	6
6843663	5730403B10Rik	0	-0.130544	-0.251728	-0.350867	-0.135644	6
6843680	Rogdi	0	-0.146624	-0.228687	-0.316133	-0.140875	6
6844176	Ube2v2	0	-0.0617503	-0.231583	-0.276614	-0.0964073	6
6844442	Map6d1	0	-0.22492	-0.293651	-0.370539	-0.2347	6
6847090	Robo2	0	-0.208577	-0.32198	-0.386332	-0.0894183	6
6847659	Grik1	0	-0.35789	-0.484566	-0.532565	-0.35789	6
6848179	Dscam	0	-0.251939	-0.385455	-0.441787	-0.251939	6
6848854	Fam120b	0	-0.178423	-0.236485	-0.288258	-0.103917	6
6849386	Gng13	0	-0.120773	-0.544468	-0.475177	-0.233163	6
6851193	Shd	0	-0.217946	-0.330833	-0.445905	-0.217946	6
6852068	Clip4	0	-0.0880617	-0.207056	-0.27169	-0.0576611	6
6855478	Slc25a27	0	-0.245001	-0.338018	-0.392509	-0.206595	6
6855981	Satb1	0	-0.154792	-0.28568	-0.341348	-0.124737	6
6857645	Slc8a1	0	-0.257151	-0.787244	-0.691709	-0.200116	6
6858936	Impact	0	-0.0663942	-0.139365	-0.220542	-0.0550731	6
6860165	Pcdhb3	0	-0.233577	-0.370881	-0.49817	-0.0927726	6
6861278	A730017C20Rik	0	-0.16079	-0.304626	-0.44904	-0.16079	6
6863326	Abhd3	0	-0.128185	-0.280748	-0.294352	-0.0739278	6
6864444	Stard4	0	-0.0607719	-0.283327	-0.35491	-0.14707	6
6867853	Map4k2	0	-0.185994	-0.309569	-0.384842	-0.193857	6
6869013	Slc1a1	0	-0.128953	-0.282181	-0.315978	-0.205287	6
6869918	Scd3	0	-0.118035	-0.277175	-0.379659	-0.13023	6
6870991	Ankrd13d	0	-0.251071	-0.34003	-0.363671	-0.251071	6
6871121	Snx32	0	-0.24184	-0.366029	-0.355248	-0.170244	6
6871283	Flrt1	0	-0.270129	-0.329431	-0.42601	-0.144457	6
6872888	Cpeb3	0	-0.254576	-0.460181	-0.624194	-0.253312	6
6873217	Got1	0	-0.0942801	-0.18115	-0.248377	-0.115548	6
6873271	Scd1	0	-0.0742423	-0.138185	-0.198153	-0.0691869	6
6875191	Cacnb2	0	-0.217975	-0.290904	-0.42813	-0.122223	6
6875722	Abca2	0	-0.147663	-0.219693	-0.265195	-0.132055	6
6877215	Galnt13	0	-0.272747	-0.45464	-0.611445	-0.118202	6
6877740	Csrnp3	0	-0.168995	-0.438013	-0.646695	-0.20725	6
6880033	Lpcat4	0	-0.223905	-0.451209	-0.541176	-0.300191	6
6881455	Plcb4	0	-0.149894	-0.261946	-0.389981	-0.145647	6
6881556	Btbd3	0	-0.195439	-0.385142	-0.331528	-0.145847	6
6884295	Oprl1	0	-0.217624	-0.429688	-0.588949	-0.270913	6
6885734	Zer1	0	-0.164297	-0.23812	-0.289811	-0.159395	6
6886118	Strbp	0	-0.230173	-0.356813	-0.52009	-0.151981	6
6886244	Lrp1b	0	-0.247117	-0.36267	-0.483386	-0.201908	6
6888763	1110051M20Rik	0	-0.129127	-0.212127	-0.292628	-0.129127	6
6889350	Tcp11l1	0	-0.116648	-0.24506	-0.264534	-0.176192	6
6889978	Meis2	0	-0.177592	-0.332915	-0.372351	-0.187156	6
6890382	Ppip5k1	0	-0.217934	-0.339063	-0.391452	-0.195016	6
6890402	Frmd5	0	-0.242065	-0.355864	-0.45009	-0.22619	6
6892190	Dusp15	0	-0.160493	-0.275957	-0.285716	-0.151369	6
6892493	Ndrg3	0	-0.0897628	-0.172997	-0.214513	-0.0844778	6
6897579	Smad9	0	-0.291595	-0.444438	-0.522136	-0.122799	6
6899574	Lingo4	0	-0.244084	-0.39501	-0.471412	-0.250399	6
6899578	Tdrkh	0	-0.216677	-0.294783	-0.387668	-0.216867	6
6900287	Kcna2	0	-0.186964	-0.356047	-0.415351	-0.173515	6
6900407	Wdr47	0	-0.17485	-0.292574	-0.398488	-0.160532	6
6900608	Olfm3	0	-0.255785	-0.557743	-0.629569	-0.311966	6
6900659	Extl2	0	-0.106361	-0.241433	-0.259223	-0.129232	6
6900768	4833424O15Rik	0	-0.233383	-0.358465	-0.370425	-0.271106	6
6901573	Tacr3	0	-0.382189	-0.480127	-0.553427	-0.186454	6
6906261	Gria2	0	-0.213302	-0.35016	-0.450132	-0.202244	6
6906325	Gucy1b3	0	-0.187188	-0.259818	-0.349185	-0.140407	6
6906694	Bcan	0	-0.160037	-0.321806	-0.252139	-0.160952	6
6907224	Car14	0	-0.0706528	-0.241357	-0.313176	-0.0905233	6
6909083	Ugt8a	0	-0.160512	-0.27028	-0.265699	-0.192666	6
6910622	Fam73a	0	-0.124024	-0.228119	-0.272036	-0.108639	6
6911833	Runx1t1	0	-0.214731	-0.295486	-0.322533	-0.150294	6
6912524	Srsf12	0	-0.198297	-0.343616	-0.373487	-0.153024	6
6913371	E130309F12Rik	0	-0.172187	-0.318153	-0.428965	-0.148531	6
6914129	Trim32	0	-0.137226	-0.295752	-0.318016	-0.14922	6
6915993	Dab1	0	-0.178293	-0.493683	-0.630691	-0.233528	6
6916220	Rab3b	0	-0.147791	-0.381176	-0.498001	-0.209819	6
6917963	Rap1gap	0	-0.23724	-0.349878	-0.396569	-0.23724	6
6921058	Cntfr	0	-0.155768	-0.230748	-0.299298	-0.128521	6
6921163	Gba2	0	-0.181957	-0.334058	-0.406628	-0.214786	6
6922471	Dbc1	0	-0.157592	-0.25715	-0.360023	-0.140505	6
6929407	Actr3b	0	-0.263238	-0.44833	-0.389985	-0.291835	6
6929919	Ablim2	0	-0.137425	-0.25768	-0.29512	-0.0863245	6
6931603	Slc10a4	0	-0.129746	-0.367164	-0.563511	-0.165128	6
6931961	Lphn3	0	-0.115904	-0.190464	-0.268064	-0.115904	6
6933447	Galnt9	0	-0.118796	-0.316811	-0.391943	-0.196125	6
6934024	Gm15800	0	-0.179429	-0.29037	-0.374603	-0.20245	6
6935060	Ufsp1	0	-0.117622	-0.302531	-0.360685	-0.165731	6
6935630	Mtus2	0	-0.27	-0.498247	-0.46935	-0.26503	6
6938093	Ppargc1a	0	-0.171464	-0.308851	-0.441459	-0.114794	6
6938171	Lgi2	0	-0.170499	-0.35623	-0.523843	-0.205104	6
6939604	Epha5	0	-0.215926	-0.298303	-0.328997	-0.166898	6
6941780	Rhof	0	-0.174346	-0.35474	-0.346865	-0.253002	6
6943862	Ppp1r9a	0	-0.156328	-0.243125	-0.320544	-0.130217	6
6946412	Adcyap1r1	0	-0.108656	-0.209028	-0.323615	-0.0782784	6
6948773	Cntn6	0	-0.369874	-0.551501	-0.527632	-0.341876	6
6949075	Cpne9	0	-0.293833	-0.421215	-0.445959	-0.293833	6
6949152	Slc6a11	0	-0.128806	-0.359233	-0.421509	-0.161912	6
6949153	Slc6a1	0	-0.100656	-0.230821	-0.354704	-0.117486	6
6950072	Nrip2	0	-0.196202	-0.337658	-0.475635	-0.148124	6
6952298	Lrrc4	0	-0.380028	-0.471185	-0.600229	-0.27373	6
6952523	Plxna4	0	-0.101151	-0.20366	-0.309264	-0.092394	6
6954000	Fam13a	0	-0.287499	-0.378642	-0.452939	-0.18169	6
6955019	Wdr54	0	-0.21377	-0.294188	-0.406861	-0.178711	6
6955377	Podxl2	0	-0.0961373	-0.218849	-0.29625	-0.0830227	6
6956045	Cntn3	0	-0.235692	-0.472224	-0.537192	-0.295631	6
6956507	Srgap3	0	-0.221765	-0.328322	-0.398174	-0.158379	6
6956891	Zfp248	0	-0.21128	-0.364877	-0.43399	-0.184699	6
6957140	Gpr162	0	-0.181527	-0.296014	-0.406773	-0.199504	6
6957715	Grin2b	0	-0.275927	-0.496435	-0.648863	-0.317712	6
6960061	Vstm2b	0	-0.151907	-0.387574	-0.419458	-0.189117	6
6960403	Car11	0	-0.194222	-0.258294	-0.280863	-0.0860504	6
6962467	Me3	0	-0.215809	-0.325965	-0.421624	-0.118173	6
6962925	Pgm2l1	0	-0.203768	-0.374569	-0.441111	-0.273743	6
6963623	Calcb	0	-0.125002	-0.581852	-0.730416	-0.259317	6
6963856	6330503K22Rik	0	-0.223561	-0.360426	-0.432535	-0.198799	6
6966338	Fxyd7	0	-0.13142	-0.209483	-0.288471	-0.110204	6
6967026	Kcnj11	0	-0.416444	-0.530879	-0.651636	-0.368381	6
6967542	Nipa1	0	-0.164214	-0.274625	-0.348751	-0.184755	6
6967837	Chrna7	0	-0.168886	-0.393799	-0.425457	-0.227389	6
6967908	Fam189a1	0	-0.263783	-0.458145	-0.455522	-0.29643	6
6968643	Ntrk3	0	-0.134225	-0.23254	-0.269252	-0.0358268	6
6970857	Gprc5b	0	-0.151605	-0.187471	-0.255751	-0.0655801	6
6972120	Sprn	0	-0.29463	-0.493451	-0.640964	-0.268438	6
6977692	Lphn1	0	-0.147714	-0.242912	-0.260844	-0.146098	6
6977993	Nkd1	0	-0.177533	-0.275722	-0.305215	-0.146745	6
6978335	Cx3cl1	0	-0.177208	-0.336997	-0.417948	-0.0941748	6
6979224	Cntnap4	0	-0.332871	-0.458376	-0.575577	-0.332871	6
6983255	Abhd8	0	-0.106125	-0.247253	-0.301135	-0.160504	6
6983788	Tecr	0	-0.0933377	-0.163766	-0.226217	-0.083797	6
6985813	Kcng4	0	-0.247301	-0.437381	-0.543877	-0.292197	6
6987109	Gpr83	0	-0.267214	-0.400136	-0.533797	-0.258923	6
6987632	B3gat1	0	-0.205157	-0.327272	-0.419204	-0.239345	6
6987924	Arhgap32	0	-0.124141	-0.231201	-0.283126	-0.0766432	6
6988033	Kirrel3	0	-0.205177	-0.353099	-0.354564	-0.216574	6
6989452	Stoml1	0	-0.168261	-0.2486	-0.333374	-0.171437	6
6992490	Epm2aip1	0	-0.164333	-0.255975	-0.317713	-0.144329	6
6992492	Trank1	0	-0.283109	-0.487044	-0.617978	-0.283109	6
6993204	Gria4	0	-0.178397	-0.307165	-0.365192	-0.190699	6
6994927	Sorl1	0	-0.149725	-0.261982	-0.249754	-0.0764414	6
6995066	Abcg4	0	-0.248903	-0.373971	-0.47683	-0.236134	6
6997667	AF529169	0	-0.263164	-0.389103	-0.480675	-0.215823	6
6998327	Ephb1	0	-0.265457	-0.380423	-0.420553	-0.269945	6
7010835	Gria3	0	-0.157995	-0.300804	-0.298074	-0.140381	6
7011286	Cxx1c	0	-0.0782423	-0.17954	-0.257117	-0.0909356	6
7011776	Aff2	0	-0.111989	-0.314802	-0.403698	-0.132382	6
7012730	Ar	0	-0.261478	-0.427858	-0.522969	-0.180114	6
7012862	Nlgn3	0	-0.169157	-0.20689	-0.26343	-0.124346	6
7013015	Chic1	0	-0.190854	-0.409449	-0.544535	-0.221746	6
7013856	Tmem35	0	-0.205278	-0.344709	-0.410669	-0.205278	6
7013900	Armcx1	0	-0.193686	-0.308557	-0.386336	-0.180689	6
7013981	Arxes2	0	-0.135636	-0.246783	-0.270693	-0.09652	6
7014030	Tceal1	0	-0.197538	-0.267533	-0.359612	-0.0930208	6
7014048	Zcchc18	0	-0.147686	-0.301014	-0.423126	-0.162067	6
7015941	Slc9a7	0	-0.191639	-0.29511	-0.372302	-0.18593	6
7016317	Nkrf	0	-0.177608	-0.414026	-0.578268	-0.204511	6
7016409	Fam70a	0	-0.218316	-0.344182	-0.318077	-0.0764452	6
7016555	Odz1	0	-0.228612	-0.415116	-0.605826	-0.257628	6
7018857	2610002M06Rik	0	-0.20215	-0.29431	-0.314902	-0.179914	6
7019158	Nap1l3	0	-0.225149	-0.46749	-0.675947	-0.249217	6
7019616	Bex1	0	-0.103792	-0.246822	-0.329047	-0.0726596	6
7019994	Trpc5	0	-0.271207	-0.460658	-0.676573	-0.272537	6
6774684	Ado	0	-0.0964194	-0.308607	-0.233851	-0.142232	6
6783761	Phb	0	-0.110286	-0.38155	-0.340983	-0.173352	6
6796612	Vsx2	0	-0.296999	-0.470363	-0.411159	-0.296999	6
6811121	Ggps1	0	-0.133605	-0.302597	-0.21746	-0.0927633	6
6957766	Rerg	0	-0.282951	-0.42949	-0.363046	-0.208673	6
7015462	Porcn	0	-0.163695	-0.280474	-0.271902	-0.144475	6
6787174	Fgf18	0	-0.392138	-0.448356	-0.284344	-0.252481	8
7015339	Nudt10	0	-0.170201	-0.974474	-0.46846	-0.29343	8
6758003	Chst10	0	-0.251293	-0.39208	-0.289284	-0.234404	8
6763247	Fam163a	0	-0.352229	-0.480648	-0.362046	-0.196994	8
6775355	Gamt	0	-0.123382	-0.293981	-0.191252	-0.178223	8
6794063	Adi1	0	-0.0882878	-0.300621	-0.130915	-0.0937697	8
6796401	Exd2	0	-0.182166	-0.35996	-0.232488	-0.164343	8
6834877	Nipal2	0	-0.331932	-0.612694	-0.404773	-0.223306	8
6837835	Rabl2	0	-0.242883	-0.34125	-0.23821	-0.150961	8
6876947	Lypd6	0	-0.251053	-0.398018	-0.24627	-0.213809	8
6892208	Tspyl3	0	-0.217977	-0.376439	-0.297913	-0.263168	8
6893918	2210418O10Rik	0	-0.0972431	-0.513786	-0.207362	-0.207362	8
6899766	Rbm8a	0	-0.0909999	-0.331011	-0.119712	-0.11662	8
6906056	Bche	0	-0.178536	-0.465103	-0.178536	-0.194444	8
6925362	Eif2c3	0	-0.156083	-0.290662	-0.137749	-0.0915074	8
6953051	E330009J07Rik	0	-0.19109	-0.370854	-0.218901	-0.158966	8
6968842	Homer2	0	-0.520166	-0.793977	-0.54112	-0.495815	8
6975930	Enpp6	0	-0.114697	-0.241694	-0.126356	-0.159742	8
6980547	Dcun1d2	0	-0.199034	-0.324612	-0.225946	-0.17213	8
6803319	Clmn	0	-0.306413	-0.481864	-0.379037	-0.0799756	9
6905912	1110032A04Rik	0	-0.501922	-0.878403	-0.586808	-0.0395792	9
6917656	Paqr7	0	-0.321168	-0.366946	-0.184135	0.0369809	9
6983639	Hhip	0	-0.503682	-0.749297	-0.419672	-0.042851	9
6759905	Epha4	0	-0.287933	-0.487449	-0.396969	-0.0916924	9
6824574	Rnase1	0	-0.375165	-0.646519	-0.51109	0.00880869	9
6875182	Slc39a12	0	-0.192662	-0.316924	-0.261257	-0.0263215	9
6989086	Arhgap20	0	-0.181909	-0.354508	-0.314579	-0.0386542	9
6990177	9530091C08Rik	0	-0.263219	-0.489104	-0.371766	-0.0554006	9
6748217	Lmbrd1	0	-0.147357	-0.384647	-0.224312	-0.0701149	9
6765977	Epm2a	0	-0.185005	-0.431713	-0.27923	-0.10404	9
6782139	Rnf167	0	-0.16149	-0.292088	-0.19323	-0.0493504	9
6791282	Nr1d1	0	-0.135851	-0.332832	-0.221091	-0.0340836	9
6842326	Robo1	0	-0.143297	-0.315228	-0.184141	-0.00374398	9
6844447	Abcc5	0	-0.241533	-0.289454	-0.199746	-0.11565	9
6847878	Dnajc28	0	-0.257478	-0.44334	-0.193085	-0.0119667	9
6876072	Cstad	0	-0.140606	-0.529639	-0.249653	0.0766545	9
6889741	Olfr1311	0	-0.351818	-0.712042	-0.41618	-0.016801	9
6895460	Zfhx4	0	-0.23227	-0.364291	-0.282102	-0.0703378	9
6924924	Olfr1337	0	-0.160004	-0.683146	-0.388001	0.0764336	9
6938999	Gabrg1	0	-0.255444	-0.396558	-0.280115	-0.0241412	9
6959868	Tshz3	0	-0.206068	-0.381	-0.22637	-0.112132	9
6980298	Lig4	0	-0.305571	-0.487693	-0.340693	-0.0557452	9
7014503	Alas2	0	-0.284066	-0.260581	-0.573474	-0.430129	11
6775413	Diras1	0	-0.430032	-0.466462	-0.741709	-0.500401	12
6780332	Gabrb2	0	-0.478918	-0.474351	-1.20994	-0.267658	12
6783144	Car4	0	-0.337022	-0.33373	-0.750618	-0.33373	12
6789344	Fgf11	0	-0.369403	-0.50229	-0.695623	-0.342401	12
6798418	Rapgef5	0	-0.257809	-0.249315	-0.355074	-0.14129	12
6812642	Elovl2	0	-0.334145	-0.407232	-0.646155	-0.294045	12
6833183	Accn2	0	-0.380568	-0.441807	-0.611551	-0.380568	12
6844567	Dgkg	0	-0.294788	-0.44697	-0.682405	-0.275376	12
6862827	Cbln2	0	-0.333997	-0.421318	-0.797178	-0.333997	12
6869864	Cnnm1	0	-0.275915	-0.466456	-0.827825	-0.273408	12
6892306	Necab3	0	-0.319124	-0.466102	-0.746873	-0.349832	12
6906620	Mab21l2	0	-0.283634	-0.46955	-0.820619	-0.260215	12
6908068	4933431E20Rik	0	-0.264285	-0.310702	-0.449714	-0.17678	12
6924515	Elavl4	0	-0.284783	-0.444544	-0.69827	-0.284783	12
6938167	Ccdc149	0	-0.421511	-0.523164	-0.830011	-0.437346	12
6941344	Cit	0	-0.343051	-0.41169	-0.702806	-0.265626	12
6948797	Cntn4	0	-0.360469	-0.601611	-1.01195	-0.360469	12
6951180	Far2	0	-0.344632	-0.416581	-0.743064	-0.238545	12
6958071	St8sia1	0	-0.520978	-0.468957	-1.01409	-0.417179	12
6969997	Hbb-b1	0	-0.359467	-0.301576	-0.818812	-0.384666	12
6979691	Cdk10	0	-0.531134	-0.442668	-0.843971	-0.251309	12
6979919	Slc35f3	0	-0.310099	-0.460928	-0.671524	-0.30264	12
6983890	Mast1	0	-0.265023	-0.342431	-0.67411	-0.278093	12
6984684	Cdh8	0	-0.346673	-0.411029	-0.745994	-0.286779	12
6985363	Fa2h	0	-0.24491	-0.290182	-0.437526	-0.255659	12
6988976	Drd2	0	-0.336386	-0.360568	-0.682623	-0.336386	12
6992946	Entpd3	0	-0.328671	-0.472235	-0.865513	-0.326526	12
7009748	Dgkk	0	-0.485982	-0.569101	-0.779316	-0.485982	12
7013982	Arxes1	0	-0.300159	-0.362336	-0.486612	-0.293731	12
7017155	Mcf2	0	-0.393357	-0.514997	-0.917443	-0.393357	12
6747326	Oprk1	0	-0.548964	-0.481417	-0.849227	-0.471196	12
6747577	A830018L16Rik	0	-0.261953	-0.303175	-0.549079	-0.261953	12
6747850	Gdap1	0	-0.142779	-0.299845	-0.564181	-0.196502	12
6748546	Fam123c	0	-0.201869	-0.288537	-0.436817	-0.201869	12
6749935	Adam23	0	-0.0988727	-0.191812	-0.374664	-0.144729	12
6750105	Mtap2	0	-0.0566925	-0.0970229	-0.274885	-0.0989378	12
6750143	Unc80	0	-0.133626	-0.244501	-0.514589	-0.171444	12
6750643	Slc4a3	0	-0.183724	-0.25087	-0.397071	-0.183724	12
6751011	9430031J16Rik	0	-0.268449	-0.354376	-0.512493	-0.268449	12
6751337	Efhd1	0	-0.196571	-0.214174	-0.41636	-0.0817654	12
6753108	Klhdc8a	0	-0.194523	-0.272231	-0.505395	-0.194523	12
6753157	Lrrn2	0	-0.227789	-0.227789	-0.345571	-0.227789	12
6753185	Plekha6	0	-0.220427	-0.307321	-0.44772	-0.203474	12
6755323	Fmn2	0	-0.174555	-0.166421	-0.322904	-0.101061	12
6755630	Sccpdh	0	-0.106257	-0.12805	-0.20633	-0.11702	12
6757120	Stau2	0	-0.164169	-0.258617	-0.438509	-0.164169	12
6757157	Jph1	0	-0.23411	-0.243047	-0.391213	-0.217788	12
6757357	Rims1	0	-0.190614	-0.380174	-0.652067	-0.243818	12
6758223	2610017I09Rik	0	-0.295283	-0.295283	-0.501898	-0.295283	12
6758633	Mfsd6	0	-0.125643	-0.186067	-0.333023	-0.141655	12
6758654	1700019D03Rik	0	-0.364123	-0.297176	-0.561744	-0.155578	12
6758694	Hecw2	0	-0.199241	-0.277223	-0.409264	-0.182784	12
6759782	Tuba4a	0	-0.102863	-0.166657	-0.392653	-0.148774	12
6759792	Resp18	0	-0.155074	-0.327299	-0.650244	-0.197982	12
6760251	Sphkap	0	-0.154559	-0.32965	-0.616932	-0.16921	12
6760292	Dner	0	-0.132924	-0.209681	-0.321963	-0.111312	12
6761825	Dpp10	0	-0.236708	-0.422951	-0.715329	-0.261962	12
6761914	Lypd1	0	-0.197666	-0.276214	-0.454257	-0.169869	12
6762217	Tmcc2	0	-0.166236	-0.228235	-0.398957	-0.186367	12
6762353	Adora1	0	-0.0854258	-0.162482	-0.319423	-0.115243	12
6762423	Shisa4	0	-0.116912	-0.131262	-0.26698	-0.167548	12
6763196	Cacna1e	0	-0.30714	-0.440475	-0.669359	-0.30714	12
6763585	Dnm3	0	-0.12229	-0.170761	-0.373289	-0.146392	12
6763706	Atp1b1	0	-0.0658716	-0.135224	-0.260934	-0.0829123	12
6764140	Kcnj9	0	-0.277076	-0.38334	-0.654535	-0.232306	12
6764211	Cadm3	0	-0.105073	-0.11896	-0.314672	-0.126077	12
6764694	Enah	0	-0.072529	-0.114935	-0.251708	-0.111996	12
6764841	Mark1	0	-0.181518	-0.230283	-0.376837	-0.181518	12
6765332	Camk1g	0	-0.235589	-0.487376	-0.858701	-0.255307	12
6765716	Lrp11	0	-0.0975032	-0.118548	-0.345829	-0.106092	12
6766409	Ahi1	0	-0.110977	-0.157452	-0.306621	-0.0976311	12
6768151	Spock2	0	-0.15199	-0.226444	-0.415519	-0.163319	12
6768897	Chchd10	0	-0.0781556	-0.100705	-0.234564	-0.0941779	12
6769105	Slc1a6	0	-0.306542	-0.430315	-0.5842	-0.306542	12
6769209	Apc2	0	-0.190655	-0.190655	-0.426557	-0.190655	12
6769212	Reep6	0	-0.229629	-0.269264	-0.468793	-0.216459	12
6769481	Btbd11	0	-0.154358	-0.318277	-0.639715	-0.203774	12
6770325	Slc6a15	0	-0.231604	-0.335828	-0.46451	-0.226981	12
6770465	Ppfia2	0	-0.222125	-0.282135	-0.566813	-0.222125	12
6773069	Ncoa7	0	-0.121058	-0.143536	-0.305108	-0.130529	12
6773080	Tpd52l1	0	-0.112392	-0.154383	-0.371676	-0.12109	12
6773147	Clvs2	0	-0.229486	-0.279606	-0.767419	-0.26108	12
6775750	Syn3	0	-0.237544	-0.369166	-0.726779	-0.25152	12
6775876	Ano4	0	-0.192435	-0.340656	-0.646469	-0.229073	12
6778355	Gal3st1	0	-0.210884	-0.234449	-0.334358	-0.23036	12
6778939	Vstm2a	0	-0.184377	-0.385308	-0.631643	-0.163816	12
6779790	Gpr75	0	-0.158941	-0.325224	-0.599039	-0.180776	12
6779827	Nsg2	0	-0.160722	-0.250363	-0.439152	-0.108059	12
6780945	Fstl4	0	-0.278165	-0.278165	-0.473185	-0.278165	12
6780986	Kif3a	0	-0.132039	-0.181572	-0.243636	-0.139943	12
6781029	Acsl6	0	-0.105356	-0.197228	-0.423381	-0.15119	12
6781201	Gria1	0	-0.125961	-0.231286	-0.456748	-0.0958688	12
6781303	Hist3h2ba	0	-0.470865	-0.195948	-1.15326	-0.349394	12
6781982	Vamp2	0	-0.0756485	-0.118569	-0.244863	-0.0873961	12
6782005	A030009H04Rik	0	-0.100098	-0.222017	-0.496861	-0.111607	12
6782277	Camkk1	0	-0.222595	-0.382972	-0.644231	-0.246002	12
6782569	Coro6	0	-0.237175	-0.379352	-0.62684	-0.270876	12
6782626	Sez6	0	-0.208276	-0.253163	-0.348325	-0.208276	12
6782830	Cdk5r1	0	-0.195816	-0.276553	-0.399649	-0.198232	12
6783784	Phospho1	0	-0.229006	-0.229006	-0.48075	-0.229006	12
6783840	Hoxb8	0	-0.21548	-0.304666	-0.444162	-0.183793	12
6784245	Tubg2	0	-0.192394	-0.243502	-0.426696	-0.192394	12
6784363	Adam11	0	-0.173884	-0.237449	-0.338502	-0.173884	12
6784787	Arsg	0	-0.217884	-0.215381	-0.28601	-0.150013	12
6784844	Kcnj16	0	-0.16944	-0.153255	-0.316334	-0.12647	12
6785114	Rab37	0	-0.262126	-0.195876	-0.501004	-0.321374	12
6785251	Mgat5b	0	-0.286447	-0.363137	-0.493615	-0.286447	12
6785608	Inpp5j	0	-0.304961	-0.346091	-0.548287	-0.286626	12
6785641	Mtfp1	0	-0.267858	-0.327469	-0.436238	-0.217783	12
6785642	Sec14l2	0	-0.235584	-0.259354	-0.345004	-0.150412	12
6785758	Camk2b	0	-0.124109	-0.252351	-0.415341	-0.149084	12
6787197	Kcnip1	0	-0.188228	-0.353666	-0.744137	-0.240299	12
6787525	Gabrg2	0	-0.159477	-0.331183	-0.557298	-0.195857	12
6787527	Gabra1	0	-0.208883	-0.366878	-0.647292	-0.23411	12
6787741	Nipal4	0	-0.175015	-0.204722	-0.544101	-0.282195	12
6788423	Glra1	0	-0.128809	-0.276197	-0.550001	-0.18271	12
6788655	Gjc2	0	-0.212875	-0.287386	-0.688424	-0.263156	12
6788672	Snap47	0	-0.0869024	-0.16476	-0.260974	-0.101007	12
6788836	Rnf112	0	-0.26177	-0.26177	-0.377667	-0.26177	12
6789047	Arhgap44	0	-0.162376	-0.289899	-0.529109	-0.201391	12
6789309	Efnb3	0	-0.146005	-0.146005	-0.351964	-0.168314	12
6789969	Sarm1	0	-0.224078	-0.225717	-0.403979	-0.224078	12
6791317	Krt222	0	-0.18915	-0.350992	-0.66812	-0.266202	12
6791418	Hap1	0	-0.113659	-0.181913	-0.492239	-0.156622	12
6791428	Acly	0	-0.075358	-0.106163	-0.23285	-0.129148	12
6791532	Mpp2	0	-0.262638	-0.286352	-0.552661	-0.262638	12
6792666	Rbfox3	0	-0.172296	-0.294425	-0.584621	-0.215683	12
6792733	Aatk	0	-0.105012	-0.111905	-0.294078	-0.118052	12
6794104	Myt1l	0	-0.157341	-0.277651	-0.612828	-0.208514	12
6795522	Lrfn5	0	-0.279006	-0.424979	-0.648494	-0.288659	12
6795811	Atl1	0	-0.17955	-0.263529	-0.476727	-0.195904	12
6796403	Galntl1	0	-0.105088	-0.106869	-0.397209	-0.129505	12
6796773	Tmem63c	0	-0.204412	-0.345856	-0.627366	-0.249376	12
6797538	Otub2	0	-0.276512	-0.293046	-0.481598	-0.264272	12
6797551	Ppp4r4	0	-0.13152	-0.16665	-0.401376	-0.16665	12
6797893	Cyp46a1	0	-0.183805	-0.263365	-0.361246	-0.183805	12
6797969	Meg3	0	-0.157348	-0.200737	-0.334615	-0.157348	12
6798281	AW555464	0	-0.0922575	-0.164455	-0.372694	-0.162277	12
6798404	Ptprn2	0	-0.168732	-0.276345	-0.472343	-0.166446	12
6801395	Mdga2	0	-0.216485	-0.256644	-0.429303	-0.194714	12
6801491	Cdkl1	0	-0.293809	-0.349716	-0.748925	-0.293809	12
6801807	Kcnh5	0	-0.23595	-0.408336	-0.633729	-0.272478	12
6801902	Spnb1	0	-0.167599	-0.264141	-0.445711	-0.172332	12
6803891	Tmem179	0	-0.14931	-0.230989	-0.543544	-0.194879	12
6804670	Adarb2	0	-0.333411	-0.353749	-0.498755	-0.332179	12
6805103	Amph	0	-0.158332	-0.295617	-0.525709	-0.186546	12
6806581	Phactr1	0	-0.126601	-0.218458	-0.340942	-0.134972	12
6806791	Cap2	0	-0.193836	-0.239661	-0.464686	-0.193836	12
6807201	Unc5a	0	-0.233132	-0.265104	-0.475698	-0.233132	12
6807687	Habp4	0	-0.0802458	-0.120046	-0.287243	-0.103386	12
6808279	Pcsk1	0	-0.133344	-0.275446	-0.473793	-0.155109	12
6808957	Ankrd34b	0	-0.192247	-0.337556	-0.577823	-0.232709	12
6810063	Elovl7	0	-0.1899	-0.231903	-0.355719	-0.216051	12
6810592	Fgf10	0	-0.388654	-0.43086	-0.65954	-0.388654	12
6810782	Pfkp	0	-0.0543472	-0.116483	-0.245225	-0.0758173	12
6811046	Ryr2	0	-0.220937	-0.329781	-0.67247	-0.254869	12
6811136	Hecw1	0	-0.250225	-0.487243	-0.842099	-0.293674	12
6813084	Wnk2	0	-0.253079	-0.26662	-0.422846	-0.251007	12
6813229	Diras2	0	-0.187964	-0.319453	-0.556429	-0.186046	12
6813242	Auh	0	-0.155327	-0.211646	-0.282844	-0.155327	12
6813664	Agtpbp1	0	-0.104951	-0.143725	-0.250558	-0.108906	12
6814157	Srd5a1	0	-0.196455	-0.265138	-0.365776	-0.208512	12
6815248	Pde8b	0	-0.159972	-0.203879	-0.326247	-0.194239	12
6815382	Rgnef	0	-0.11764	-0.154916	-0.28321	-0.0639004	12
6816018	Rab3c	0	-0.191989	-0.372592	-0.883605	-0.192229	12
6818249	Grid1	0	-0.170753	-0.240867	-0.507131	-0.208446	12
6819244	Cpne6	0	-0.224892	-0.315428	-0.483067	-0.209568	12
6819442	Fgf9	0	-0.242388	-0.509366	-0.875757	-0.288369	12
6819549	Fam123a	0	-0.232839	-0.31805	-0.426797	-0.232036	12
6819860	Fbxo16	0	-0.32936	-0.352082	-0.472739	-0.309531	12
6819907	Stmn4	0	-0.0961075	-0.105574	-0.275236	-0.123555	12
6819910	Adra1a	0	-0.140628	-0.223431	-0.398991	-0.142172	12
6819928	Pnma2	0	-0.148415	-0.32466	-0.619574	-0.163687	12
6819957	Kctd9	0	-0.146189	-0.171897	-0.342253	-0.141127	12
6820081	Phyhip	0	-0.181506	-0.333268	-0.577919	-0.193757	12
6820752	Pcdh17	0	-0.125975	-0.180369	-0.330394	-0.163585	12
6822731	Cadps	0	-0.119276	-0.26973	-0.528016	-0.149647	12
6823887	Sncg	0	-0.0952638	-0.171998	-0.29663	-0.114669	12
6824850	Sdr39u1	0	-0.197611	-0.342857	-0.505995	-0.209841	12
6825713	Epb4.9	0	-0.165892	-0.257391	-0.493741	-0.18734	12
6829947	Baalc	0	-0.0838333	-0.171636	-0.431585	-0.114889	12
6830174	A930017M01Rik	0	-0.153513	-0.282597	-0.545721	-0.17292	12
6830480	Mal2	0	-0.205569	-0.403566	-0.788424	-0.153988	12
6831511	Bai1	0	-0.220149	-0.251253	-0.421914	-0.220149	12
6831687	Kifc2	0	-0.231928	-0.371449	-0.538123	-0.231173	12
6831775	Apol9b	0	-0.329856	-0.317651	-0.674911	-0.280553	12
6832146	Csdc2	0	-0.0894336	-0.144817	-0.295188	-0.124281	12
6832182	2014-09-03	0	-0.144553	-0.199668	-0.422255	-0.108941	12
6832276	Mpped1	0	-0.235781	-0.271517	-0.490878	-0.238883	12
6832538	Panx2	0	-0.169096	-0.215782	-0.548424	-0.207388	12
6832585	Mapk8ip2	0	-0.107703	-0.185209	-0.515704	-0.195372	12
6833057	Pfkm	0	-0.0795047	-0.116337	-0.240396	-0.0772518	12
6836558	Fam135b	0	-0.221291	-0.423228	-0.878398	-0.270367	12
6836560	Fam135b	0	-0.200814	-0.402003	-0.674382	-0.228633	12
6836691	Arc	0	-0.134217	-0.201174	-0.456873	-0.194577	12
6836830	Scrt1	0	-0.223571	-0.319807	-0.492584	-0.275458	12
6836851	Lrrc24	0	-0.246287	-0.273128	-0.412994	-0.246287	12
6837470	Sult4a1	0	-0.110659	-0.225141	-0.544056	-0.166041	12
6837507	Ldoc1l	0	-0.170676	-0.259091	-0.414457	-0.13925	12
6837791	Fam116b	0	-0.2369	-0.29093	-0.516469	-0.2369	12
6839557	2900011O08Rik	0	-0.0916918	-0.169991	-0.412061	-0.134344	12
6839751	P2rx6	0	-0.188943	-0.273457	-0.419027	-0.163298	12
6840586	Tnk2	0	-0.169584	-0.243179	-0.375308	-0.172496	12
6840705	Adcy5	0	-0.165458	-0.183805	-0.382199	-0.158263	12
6843861	Grin2a	0	-0.308725	-0.414107	-0.621216	-0.308725	12
6844321	D16H22S680E	0	-0.169296	-0.208538	-0.304008	-0.177986	12
6845459	Stxbp5l	0	-0.235261	-0.402	-0.687385	-0.249147	12
6846799	9330155M09Rik	0	-0.486606	-0.537815	-0.778957	-0.505099	12
6848594	Pde10a	0	-0.20826	-0.20826	-0.389577	-0.20826	12
6848737	Rps6ka2	0	-0.303299	-0.397005	-0.761807	-0.38381	12
6849297	Caskin1	0	-0.25988	-0.33149	-0.526	-0.25988	12
6849762	Glp1r	0	-0.189332	-0.357124	-0.652989	-0.267631	12
6850062	Prrt1	0	-0.195436	-0.219377	-0.374333	-0.177809	12
6850271	Gabbr1	0	-0.0968505	-0.14794	-0.362578	-0.124081	12
6850552	Enpp5	0	-0.112563	-0.159755	-0.277985	-0.0678407	12
6851198	Fsd1	0	-0.191822	-0.266517	-0.433256	-0.200729	12
6851927	Dlgap1	0	-0.151518	-0.218023	-0.340599	-0.148388	12
6854383	Syngr3	0	-0.188465	-0.284535	-0.549846	-0.202766	12
6854446	Rhbdl1	0	-0.20853	-0.297452	-0.481246	-0.214483	12
6854467	Arhgdig	0	-0.123979	-0.164277	-0.374753	-0.142175	12
6854537	Grm4	0	-0.237877	-0.237877	-0.471491	-0.237877	12
6855608	Tmem151b	0	-0.11636	-0.164599	-0.403009	-0.147765	12
6856584	Pja2	0	-0.0656406	-0.135418	-0.217493	-0.0743329	12
6860176	Pcdhb8	0	-0.242364	-0.419736	-0.796011	-0.30458	12
6860195	Pcdhb15	0	-0.208382	-0.350485	-0.590466	-0.144329	12
6860259	Arhgap26	0	-0.146995	-0.241422	-0.370869	-0.111427	12
6861350	Camk2a	0	-0.126406	-0.228078	-0.564664	-0.151641	12
6861441	Spink10	0	-0.375954	-0.385017	-0.646865	-0.385017	12
6861468	Napg	0	-0.106054	-0.169583	-0.273096	-0.118754	12
6861688	Gnal	0	-0.110567	-0.180314	-0.546141	-0.180314	12
6861711	Slmo1	0	-0.181751	-0.275681	-0.432013	-0.198872	12
6863857	Nol4	0	-0.177705	-0.230391	-0.390324	-0.177705	12
6863965	Rprd1a	0	-0.148184	-0.188405	-0.291627	-0.133488	12
6864837	Fgf1	0	-0.0978088	-0.197869	-0.375073	-0.0970316	12
6865221	Trim36	0	-0.287681	-0.287681	-0.532188	-0.287681	12
6865267	Sema6a	0	-0.146836	-0.158231	-0.248195	-0.183039	12
6866545	Dcc	0	-0.338225	-0.367404	-0.571358	-0.338225	12
6867638	Pitpnm1	0	-0.165757	-0.222261	-0.29511	-0.165757	12
6867677	Pcx	0	-0.20022	-0.245195	-0.389958	-0.199576	12
6867861	Nrxn2	0	-0.135417	-0.185381	-0.304625	-0.135417	12
6868728	Apba1	0	-0.145312	-0.155022	-0.300309	-0.145312	12
6868899	Vldlr	0	-0.108492	-0.108492	-0.340032	-0.111803	12
6870125	Ina	0	-0.125404	-0.273051	-0.528332	-0.179489	12
6870193	Sorcs3	0	-0.144808	-0.200859	-0.460206	-0.18133	12
6870979	Carns1	0	-0.262209	-0.21839	-0.358466	-0.117954	12
6871060	Peli3	0	-0.183512	-0.23802	-0.48399	-0.21091	12
6871076	Cnih2	0	-0.0963572	-0.125437	-0.28877	-0.154647	12
6871264	Kcnk4	0	-0.234766	-0.245512	-0.380615	-0.216481	12
6871929	Rorb	0	-0.166704	-0.21292	-0.315847	-0.102098	12
6872551	Ranbp6	0	-0.121476	-0.229768	-0.431736	-0.143458	12
6873149	Slit1	0	-0.239363	-0.268576	-0.47697	-0.239363	12
6873187	Crtac1	0	-0.267092	-0.386855	-0.649131	-0.344929	12
6873333	Lbx1	0	-0.206321	-0.333601	-0.537015	-0.124273	12
6873368	Kcnip2	0	-0.276277	-0.392373	-0.556892	-0.266762	12
6873407	Psd	0	-0.160418	-0.170774	-0.365879	-0.170774	12
6874080	Hspa12a	0	-0.150547	-0.205794	-0.357705	-0.127347	12
6874610	Bend7	0	-0.209988	-0.214082	-0.495726	-0.209988	12
6875836	Cacfd1	0	-0.443511	-0.594623	-0.888244	-0.31092	12
6877963	Gad1	0	-0.17454	-0.260738	-0.402732	-0.17454	12
6878702	Ypel4	0	-0.113614	-0.238777	-0.487612	-0.155764	12
6879833	Kcna4	0	-0.202382	-0.254177	-0.500575	-0.209852	12
6880544	Tyro3	0	-0.184688	-0.199413	-0.320319	-0.184688	12
6880639	Ckmt1	0	-0.133532	-0.257784	-0.516582	-0.185046	12
6880931	Slc27a2	0	-0.392379	-0.417931	-0.661256	-0.392379	12
6881652	Macrod2	0	-0.302492	-0.302492	-0.704737	-0.302492	12
6882556	Mmp24	0	-0.235748	-0.263719	-0.421949	-0.235748	12
6882738	Snhg11	0	-0.208574	-0.251549	-0.498815	-0.224668	12
6884019	Phactr3	0	-0.16023	-0.195274	-0.282684	-0.161236	12
6885345	Cacna1b	0	-0.225853	-0.303798	-0.531381	-0.267439	12
6885522	Fam163b	0	-0.222755	-0.245157	-0.458738	-0.222755	12
6885924	Garnl3	0	-0.117227	-0.117227	-0.355352	-0.117227	12
6886117	Strbp	0	-0.124665	-0.207597	-0.374428	-0.147573	12
6886947	Ermn	0	-0.0646861	-0.087409	-0.203333	-0.0952249	12
6887327	Scn1a	0	-0.194948	-0.480646	-0.835439	-0.219758	12
6887854	Chn1	0	-0.142818	-0.248606	-0.397668	-0.145272	12
6887901	Lnp	0	-0.218249	-0.225755	-0.421173	-0.225755	12
6888016	Zfp385b	0	-0.194372	-0.285024	-0.431198	-0.151312	12
6888310	Tmx2	0	-0.0617041	-0.0997549	-0.275207	-0.110698	12
6888751	Madd	0	-0.206772	-0.219355	-0.32269	-0.206772	12
6890312	Ttbk2	0	-0.13412	-0.199902	-0.35393	-0.149134	12
6890699	Kcnip3	0	-0.119856	-0.131274	-0.27442	-0.121608	12
6892374	Ggt7	0	-0.134229	-0.199743	-0.389984	-0.169813	12
6892747	Ptprt	0	-0.213499	-0.299585	-0.464899	-0.187787	12
6894265	Kcnq2	0	-0.204006	-0.247278	-0.497807	-0.221665	12
6894268	Eef1a2	0	-0.0714397	-0.128263	-0.325302	-0.123835	12
6896615	Usp13	0	-0.151828	-0.250716	-0.456769	-0.192721	12
6896997	Hspa4l	0	-0.126161	-0.2254	-0.351857	-0.11502	12
6897627	Mab21l1	0	-0.23388	-0.254779	-0.505876	-0.207136	12
6898477	Serpini1	0	-0.135154	-0.225042	-0.434298	-0.169704	12
6898502	Fstl5	0	-0.248214	-0.324143	-0.732551	-0.264714	12
6899429	Sprr2e	0	-0.245464	-0.251738	-0.697097	-0.103737	12
6900214	Kcnd3	0	-0.123476	-0.23188	-0.406385	-0.122469	12
6900369	Amigo1	0	-0.226947	-0.255182	-0.429616	-0.210782	12
6901551	Cxxc4	0	-0.287737	-0.370062	-0.520931	-0.231456	12
6905321	Pfn2	0	-0.0898349	-0.144218	-0.234684	-0.0982615	12
6905530	Gpr149	0	-0.207099	-0.285387	-0.633805	-0.169294	12
6905570	Plch1	0	-0.205464	-0.270352	-0.411728	-0.205464	12
6906267	Glrb	0	-0.119985	-0.221585	-0.340452	-0.125112	12
6906441	Trim2	0	-0.0956606	-0.175286	-0.315857	-0.126622	12
6906634	Dclk2	0	-0.194357	-0.211495	-0.325348	-0.122297	12
6908029	Kcnc4	0	-0.20881	-0.249658	-0.547001	-0.20881	12
6908073	Gstm7	0	-0.0646743	-0.0927928	-0.299347	-0.138064	12
6910642	Ak5	0	-0.18103	-0.280578	-0.508674	-0.0948127	12
6911212	Rusc1	0	-0.167744	-0.230998	-0.401883	-0.185553	12
6911914	Calb1	0	-0.218096	-0.277425	-0.572159	-0.202313	12
6912987	N28178	0	-0.275341	-0.380132	-0.722702	-0.275341	12
6913128	Grhpr	0	-0.156255	-0.1848	-0.263871	-0.151553	12
6915070	Sh3gl2	0	-0.148606	-0.308249	-0.56714	-0.199136	12
6915844	Dnajc6	0	-0.19878	-0.303145	-0.552556	-0.199281	12
6915871	Sgip1	0	-0.14772	-0.229964	-0.450117	-0.161881	12
6916663	Slc6a9	0	-0.134721	-0.195872	-0.315175	-0.143603	12
6916836	Rims3	0	-0.202228	-0.254613	-0.355303	-0.202228	12
6916947	Hpcal4	0	-0.225614	-0.258969	-0.520325	-0.214831	12
6917125	Oscp1	0	-0.204309	-0.239071	-0.383232	-0.0933691	12
6917217	Dlgap3	0	-0.193363	-0.214005	-0.333802	-0.214005	12
6917997	Camk2n1	0	-0.0679219	-0.13613	-0.318383	-0.103657	12
6918705	Fbxo2	0	-0.154177	-0.160562	-0.289645	-0.119775	12
6918814	Clstn1	0	-0.0923363	-0.156712	-0.28664	-0.104589	12
6919417	Tox	0	-0.242734	-0.297561	-0.463223	-0.13524	12
6919895	Necab1	0	-0.151252	-0.28953	-0.585675	-0.158165	12
6921562	Tmem246	0	-0.201198	-0.238258	-0.389625	-0.198383	12
6923284	Elavl2	0	-0.165879	-0.25735	-0.456989	-0.205484	12
6924181	Prkaa2	0	-0.0993583	-0.120446	-0.291232	-0.0993583	12
6924750	Faah	0	-0.339385	-0.385143	-0.494056	-0.332197	12
6924927	Olfr1333	0	-0.263381	-0.124211	-0.499108	-0.168486	12
6924968	Rimkla	0	-0.217227	-0.390593	-0.609642	-0.245898	12
6925547	Hpca	0	-0.156187	-0.186069	-0.411798	-0.159632	12
6925777	Oprd1	0	-0.231392	-0.244264	-0.533357	-0.231392	12
6926344	Mrto4	0	-0.273156	-0.345899	-0.577591	-0.167044	12
6926864	Clcn6	0	-0.103793	-0.159546	-0.311172	-0.118807	12
6926882	Fbxo44	0	-0.132198	-0.237891	-0.459956	-0.181003	12
6926938	Kif1b	0	-0.0770803	-0.131787	-0.230355	-0.0953125	12
6927248	Prkcz	0	-0.173647	-0.333425	-0.871223	-0.22664	12
6928889	Pclo	0	-0.243964	-0.353637	-0.623193	-0.243855	12
6929457	Dpp6	0	-0.124652	-0.228833	-0.446532	-0.152434	12
6929550	Rnf32	0	-0.385531	-0.415422	-0.574698	-0.385531	12
6929644	Dpysl5	0	-0.266878	-0.266878	-0.394365	-0.266878	12
6929647	Mapre3	0	-0.100461	-0.155876	-0.306525	-0.126081	12
6930022	Crmp1	0	-0.108541	-0.160509	-0.399627	-0.161952	12
6931355	Uchl1	0	-0.0730102	-0.103555	-0.272995	-0.130105	12
6932409	Parm1	0	-0.168484	-0.212949	-0.31907	-0.127599	12
6933602	Mvk	0	-0.167421	-0.208393	-0.366899	-0.235838	12
6933697	Cit	0	-0.225074	-0.270759	-0.420374	-0.235205	12
6933800	Nos1	0	-0.192966	-0.264283	-0.401975	-0.102022	12
6933812	Tesc	0	-0.207817	-0.271335	-0.462844	-0.210691	12
6934933	Rhbdd2	0	-0.114848	-0.133384	-0.256871	-0.0885999	12
6935059	Ache	0	-0.19224	-0.348677	-0.655574	-0.249201	12
6935073	Actl6b	0	-0.204711	-0.325094	-0.506228	-0.222387	12
6935235	Elfn1	0	-0.174348	-0.174348	-0.343015	-0.250037	12
6935534	Wasf3	0	-0.161585	-0.195103	-0.438622	-0.172997	12
6936076	Adam22	0	-0.16139	-0.255772	-0.372639	-0.156254	12
6936719	Kcnh2	0	-0.199607	-0.312191	-0.606589	-0.288428	12
6936750	Smarcd3	0	-0.165503	-0.264453	-0.390387	-0.165503	12
6937585	Nsg1	0	-0.081781	-0.155119	-0.346674	-0.138084	12
6939005	Gabra2	0	-0.129297	-0.12827	-0.24128	-0.117684	12
6940333	Tmem150c	0	-0.17286	-0.271578	-0.509352	-0.193851	12
6940534	Mapk10	0	-0.310335	-0.324645	-0.508619	-0.245146	12
6941128	Asphd2	0	-0.233853	-0.29942	-0.52498	-0.233853	12
6941157	Sgsm1	0	-0.140552	-0.209445	-0.582816	-0.21433	12
6941189	Svop	0	-0.240819	-0.276082	-0.43589	-0.253346	12
6941645	Dtx1	0	-0.158132	-0.178103	-0.300284	-0.158132	12
6941857	Abcb9	0	-0.210659	-0.293757	-0.468682	-0.2178	12
6942973	Tmem130	0	-0.140557	-0.266508	-0.636869	-0.187295	12
6943142	Flt3	0	-0.372647	-0.375406	-0.572665	-0.327853	12
6944039	Nxph1	0	-0.248659	-0.31159	-0.430789	-0.233829	12
6945066	Fam40b	0	-0.387288	-0.47774	-0.614166	-0.387288	12
6945419	Chrm2	0	-0.187212	-0.357533	-0.689185	-0.196374	12
6946558	Herc3	0	-0.22173	-0.301891	-0.461877	-0.219131	12
6946945	Reep1	0	-0.104974	-0.165402	-0.364517	-0.155238	12
6947985	Hdac11	0	-0.146366	-0.199605	-0.359929	-0.116232	12
6949191	Syn2	0	-0.151897	-0.219112	-0.393058	-0.151897	12
6949586	Tuba8	0	-0.216534	-0.252445	-0.4873	-0.216534	12
6950160	Gabarapl1	0	-0.0526422	-0.0937656	-0.227945	-0.0687496	12
6951276	Bicd1	0	-0.162248	-0.292061	-0.480967	-0.174847	12
6952194	Tmem229a	0	-0.215391	-0.205584	-0.360756	-0.129779	12
6952227	Gpr37	0	-0.188476	-0.249862	-0.375042	-0.164302	12
6953126	Fam131b	0	-0.0991168	-0.0833988	-0.386426	-0.171908	12
6953762	Scrn1	0	-0.0844506	-0.139539	-0.235423	-0.0813413	12
6953920	Ppm1k	0	-0.171613	-0.245767	-0.403522	-0.0729856	12
6954035	Snca	0	-0.225126	-0.252617	-0.527428	-0.213537	12
6955653	Magi1	0	-0.142375	-0.158492	-0.313562	-0.118661	12
6956509	Srgap3	0	-0.165001	-0.27835	-0.41802	-0.159288	12
6956537	Lhfpl4	0	-0.125546	-0.132809	-0.326598	-0.132809	12
6957246	Kcna1	0	-0.0861197	-0.127904	-0.303244	-0.10598	12
6957844	Lmo3	0	-0.250441	-0.335846	-0.48835	-0.221446	12
6958078	St8sia1	0	-0.269661	-0.285848	-0.383235	-0.231187	12
6958439	Dennd5b	0	-0.178445	-0.245342	-0.343721	-0.178445	12
6958927	Ccdc8	0	-0.237092	-0.245601	-0.474501	-0.237092	12
6959208	Tmem145	0	-0.224634	-0.224634	-0.436799	-0.224634	12
6959317	Ttc9b	0	-0.221022	-0.306974	-0.44434	-0.253625	12
6960270	Lrrc4b	0	-0.164605	-0.172892	-0.285626	-0.153466	12
6960457	Kcnc1	0	-0.203506	-0.333843	-0.701068	-0.333843	12
6961010	Ndn	0	-0.0735724	-0.135327	-0.262218	-0.0882381	12
6962736	Odz4	0	-0.256062	-0.339099	-0.444005	-0.256062	12
6963003	Stard10	0	-0.0707874	-0.115273	-0.2382	-0.0942184	12
6963197	Cckbr	0	-0.197785	-0.219601	-0.402053	-0.219601	12
6963264	Syt9	0	-0.19416	-0.220774	-0.399876	-0.163628	12
6965233	Brsk2	0	-0.151776	-0.252671	-0.473024	-0.189588	12
6965970	Tmem91	0	-0.117966	-0.236592	-0.51334	-0.187862	12
6966967	Ppfia3	0	-0.15055	-0.284859	-0.608091	-0.244255	12
6966972	Lin7b	0	-0.244332	-0.285508	-0.381871	-0.244332	12
6967593	Gabra5	0	-0.203917	-0.42634	-0.825186	-0.241869	12
6968453	Sv2b	0	-0.214123	-0.370627	-0.678113	-0.249208	12
6969814	Mrpl48	0	-0.244334	-0.228403	-0.516586	-0.130358	12
6970134	Apbb1	0	-0.11551	-0.14352	-0.283996	-0.14352	12
6970370	Trim66	0	-0.252354	-0.254708	-0.464341	-0.252354	12
6971899	Ebf3	0	-0.17457	-0.259715	-0.452785	-0.120547	12
6972114	Caly	0	-0.205762	-0.265094	-0.503945	-0.205762	12
6972149	Zfp941	0	-0.133984	-0.241361	-0.474504	-0.107551	12
6972260	Dusp8	0	-0.137196	-0.233808	-0.366539	-0.152163	12
6973201	Shisa7	0	-0.319369	-0.391344	-0.643424	-0.367124	12
6973435	Usp29	0	-0.240293	-0.422784	-0.821019	-0.263988	12
6973688	Camsap3	0	-0.272303	-0.312886	-0.493547	-0.272303	12
6973739	Ccl25	0	-0.210036	-0.113049	-0.545359	-0.303298	12
6974220	Dlgap2	0	-0.277838	-0.374335	-0.566366	-0.277838	12
6976233	Glra3	0	-0.167158	-0.265663	-0.628558	-0.243619	12
6976976	Hapln4	0	-0.23346	-0.412024	-0.77805	-0.277591	12
6977169	Nwd1	0	-0.251504	-0.253726	-0.458765	-0.169858	12
6977661	Clgn	0	-0.271482	-0.29494	-0.54408	-0.371638	12
6978274	Ogfod1	0	-0.146801	-0.224618	-0.343461	-0.152756	12
6979597	Jph3	0	-0.23341	-0.386154	-0.613299	-0.239322	12
6979699	Spire2	0	-0.176922	-0.188634	-0.466147	-0.176922	12
6979914	Kcnk1	0	-0.138546	-0.220722	-0.377782	-0.0843477	12
6980598	2410022L05Rik	0	-0.152167	-0.167341	-0.315795	-0.16746	12
6982585	Wdr17	0	-0.383632	-0.416675	-0.700764	-0.298006	12
6983999	Cbln1	0	-0.345596	-0.388033	-0.652156	-0.307563	12
6986150	Pcnxl2	0	-0.234999	-0.351477	-0.605116	-0.280557	12
6986602	Kbtbd3	0	-0.279535	-0.344225	-0.520027	-0.338289	12
6986781	Pgr	0	-0.305494	-0.356902	-0.660812	-0.305494	12
6987358	Pde4a	0	-0.171365	-0.255009	-0.391509	-0.192172	12
6987403	Ldlr	0	-0.167024	-0.222673	-0.604608	-0.22795	12
6987414	BC018242	0	-0.177603	-0.182137	-0.305481	-0.178597	12
6988209	Hepacam	0	-0.0788319	-0.140776	-0.252706	-0.0740533	12
6988366	Scn3b	0	-0.165955	-0.165955	-0.446062	-0.138655	12
6988713	Scn2b	0	-0.201384	-0.371162	-0.614379	-0.212763	12
6989403	Rpp25	0	-0.336205	-0.391867	-0.589174	-0.300135	12
6989473	6030419C18Rik	0	-0.151908	-0.186242	-0.290486	-0.153569	12
6992012	Rab6b	0	-0.114218	-0.19653	-0.419113	-0.158718	12
6992091	Cpne4	0	-0.328465	-0.439599	-0.70902	-0.328465	12
6992215	Cacna2d2	0	-0.22988	-0.370827	-0.673054	-0.287137	12
6992276	Camkv	0	-0.250619	-0.287379	-0.557135	-0.188282	12
6992372	Nckipsd	0	-0.152372	-0.208913	-0.319938	-0.183984	12
6992493	Dclk3	0	-0.206434	-0.207398	-0.44497	-0.156977	12
6992942	Myrip	0	-0.204201	-0.204201	-0.426928	-0.204201	12
6994623	Ddx25	0	-0.233184	-0.338404	-0.471675	-0.233184	12
6994704	Nrgn	0	-0.242537	-0.242537	-0.602057	-0.241082	12
6995123	Tmem25	0	-0.262984	-0.312768	-0.423434	-0.254088	12
6995661	AI593442	0	-0.216072	-0.270387	-0.571871	-0.240571	12
6995736	Elmod1	0	-0.137776	-0.300271	-0.610922	-0.169126	12
6995899	Scamp5	0	-0.147973	-0.168808	-0.260557	-0.15097	12
6996127	Lrrc49	0	-0.0783811	-0.152306	-0.276377	-0.104596	12
6996213	Coro2b	0	-0.182116	-0.218295	-0.3682	-0.182116	12
6996834	Unc13c	0	-0.163649	-0.237024	-0.641873	-0.154686	12
6997528	Snap91	0	-0.133825	-0.253192	-0.53453	-0.192951	12
6998020	Trpc1	0	-0.17498	-0.211656	-0.392185	-0.17498	12
6998125	Clstn2	0	-0.167067	-0.286591	-0.434404	-0.1855	12
6998603	Dock3	0	-0.170998	-0.271506	-0.597563	-0.217954	12
6998669	Bsn	0	-0.167542	-0.183738	-0.404328	-0.180246	12
6998987	Arpp21	0	-0.233657	-0.326398	-0.514436	-0.250845	12
7009716	Nudt10	0	-0.507859	-0.570357	-0.732739	-0.464041	12
7009800	Pcsk1n	0	-0.0895688	-0.144865	-0.369119	-0.144053	12
7009872	B630019K06Rik	0	-0.194893	-0.309657	-0.5061	-0.212233	12
7010647	Zcchc12	0	-0.207555	-0.367356	-0.593453	-0.12828	12
7011937	Atp2b3	0	-0.205404	-0.335276	-0.635257	-0.259189	12
7013139	Magee1	0	-0.230646	-0.28905	-0.482518	-0.196604	12
7013952	Gprasp1	0	-0.106773	-0.206528	-0.362971	-0.10719	12
7014142	Frmpd3	0	-0.245385	-0.399318	-0.756102	-0.368362	12
7014633	Rragb	0	-0.150913	-0.281849	-0.594178	-0.199385	12
7016584	Dcaf12l1	0	-0.210952	-0.199921	-0.4197	-0.147694	12
7017277	Slitrk4	0	-0.302192	-0.496745	-0.735021	-0.336599	12
7017520	Gabra3	0	-0.145862	-0.306007	-0.537943	-0.156224	12
7017585	Pnck	0	-0.199515	-0.302246	-0.463669	-0.185977	12
7018524	Slc7a3	0	-0.300636	-0.300636	-0.541564	-0.300636	12
7019652	Rab9b	0	-0.133828	-0.235832	-0.491091	-0.178656	12
7020425	Cnksr2	0	-0.157153	-0.250471	-0.561332	-0.064373	12
7020724	Glra2	0	-0.318898	-0.318898	-0.675865	-0.324456	12
7023908	Dcun1d4	0	-0.136216	-0.165723	-0.379098	-0.157418	12
6751620	Olfr1410	0	-0.710374	-0.322761	-0.395245	-0.433338	14
6752026	Cdh20	0	-0.308587	-0.220388	-0.246765	-0.162131	14
6763062	1700025G04Rik	0	-0.391563	-0.478855	-0.408564	-0.391563	14
6798634	Fkbp1b	0	-0.312101	-0.440684	-0.331511	-0.358086	14
6820361	Kctd4	0	-0.411567	-0.387403	-0.381331	-0.239877	14
6823429	D14Ertd449e	0	-0.240954	-0.16839	-0.16839	-0.16839	14
6828034	4931432E15Rik	0	-0.819359	-0.571948	-0.589399	-0.740904	14
6851177	St6gal2	0	-0.408267	-0.415001	-0.545087	-0.356439	14
6872828	Htr7	0	-0.340258	-0.327135	-0.421173	-0.327135	14
6890120	Gpr176	0	-0.342383	-0.451861	-0.304594	-0.410526	14
6891295	Pak7	0	-0.391299	-0.48031	-0.547149	-0.391299	14
6913348	Tmeff1	0	-0.256982	-0.239248	-0.211498	-0.174355	14
6949526	Ninj2	0	-0.533163	-0.572088	-0.395033	-0.324586	14
6983056	Psd3	0	-0.424693	-0.361228	-0.34935	-0.254403	14
6985925	Mvd	0	-0.292883	-0.310089	-0.40871	-0.362246	14
7020772	Egfl6	0	-0.475218	-0.555566	-0.629323	-0.475218	14
6912040	Ttpa	0	-0.360143	-0.412419	-0.507009	-0.359251	14
6924706	Cyp4x1	0	-0.440896	-0.541048	-0.600586	-0.440896	14
6983286	Fcho1	0	-0.239328	-0.239328	-0.331387	-0.239328	14
6808781	Hapln1	0	-0.445936	-0.590949	-0.445936	-0.445936	14
6748174	B3gat2	0	-0.375475	-0.395476	-0.512891	-0.162157	15
6753700	B3galt2	0	-0.434693	-0.491674	-0.558545	-0.123027	15
6760232	Slc19a3	0	-0.593656	-0.398841	-0.427161	-0.134879	15
6775136	AI646023	0	-0.465043	-0.317297	-0.256311	-0.0795543	15
6782422	Rtn4rl1	0	-0.460307	-0.483815	-0.26145	-0.0219278	15
6789597	Aspa	0	-0.325807	-0.262479	-0.284925	-0.0957977	15
6791015	Pdk2	0	-0.270623	-0.208149	-0.280895	-0.0865466	15
6837848	Syt10	0	-0.418716	-0.426481	-0.665012	-0.136253	15
6860085	Psd2	0	-0.338416	-0.204925	-0.28386	-0.0433956	15
6860576	Kcnn2	0	-0.414099	-0.394977	-0.418594	-0.139957	15
6869547	Lgi1	0	-0.287844	-0.222457	-0.222314	-0.00462069	15
6875698	Tmem203	0	-0.49096	-0.425897	-0.57055	-0.190082	15
6889660	Bbox1	0	-0.393411	-0.354951	-0.265869	0.00417253	15
6897503	Stoml3	0	-0.657702	-0.623355	-0.469015	0.207528	15
6919612	Naip3	0	-0.941833	-0.821703	-0.959891	-0.381524	15
6920754	Mob3b	0	-0.284623	-0.317017	-0.22599	-0.125404	15
6926376	Klhdc7a	0	-0.435828	-0.452839	-0.666526	-0.112551	15
6950725	Slco1c1	0	-0.580661	-0.350501	-0.30879	-0.0649113	15
6958031	Slco1a4	0	-0.525434	-0.298494	-0.361735	0.0423244	15
6960404	Dbp	0	-0.308858	-0.250836	-0.23958	-0.0660273	15
6962086	Fam103a1	0	-0.702078	-0.677354	-0.476021	-0.175312	15
6778077	Rdh5	0	-0.312135	-0.337752	-0.423361	-0.012709	15
6780443	Ebf1	0	-0.150698	-0.269882	-0.290614	-0.0159778	15
6790699	Hlf	0	-0.265594	-0.334319	-0.373396	0.0274163	15
6824842	2610027L16Rik	0	-0.223112	-0.391239	-0.3861	-0.0118695	15
6899111	Paqr6	0	-0.205164	-0.272626	-0.255719	-0.0816277	15
6915843	Ak4	0	-0.447708	-0.563616	-0.589229	0.056769	15
6918858	Slc2a5	0	-0.421294	-0.265939	-0.512197	-0.0831726	15
6957033	Rimklb	0	-0.240983	-0.165336	-0.309459	-0.0401914	15
6958407	Tmtc1	0	-0.176031	-0.340952	-0.318009	0.030765	15
6962577	Rab30	0	-0.244228	-0.343063	-0.386152	-0.0547469	15
6969964	Olfr586	0	-0.723011	-0.727543	-0.855662	-0.0531601	15
6971129	Zkscan2	0	-0.461851	-0.415973	-0.510245	0.0296697	15
6998643	Slc38a3	0	-0.174069	-0.195585	-0.240532	-0.0174339	15
6999545	Hhatl	0	-0.229589	-0.229589	-0.380565	-0.0439161	15
7010345	Usp11	0	-0.195175	-0.265394	-0.272583	-0.0657072	15
6813844	Ptch1	0	-0.201233	-0.265798	-0.221013	-0.0721286	15
6915745	Atg4c	0	-0.254754	-0.302802	-0.231462	-0.13057	15
6855227	Olfr90	0	-0.448097	-0.409664	-0.136332	-0.580532	16
6785283	Tnrc6c	0	-0.456339	-0.398672	-0.00931539	0.00384697	17
6814055	Zfp87	0	-0.493329	-0.589061	-0.108391	-0.0601097	17
6837013	Tst	0	-0.324559	-0.216164	-0.117792	0.0132778	17
6845444	Slc15a2	0	-0.481232	-0.354984	-0.156607	0.0302153	17
6861776	Mc5r	0	-0.480582	-0.447359	0.148676	0.124021	17
6864456	D0H4S114	0	-0.324178	-0.281115	0.0951193	0.0720272	17
6935275	Chst12	0	-0.385067	-0.338567	0.0912678	0.0393475	17
6946339	Chn2	0	-0.31995	-0.361361	-0.122912	-0.109115	17
6963075	Olfr572	0	-0.974667	-0.898459	-0.352144	-0.0202214	17
6982289	Odz3	0	-0.286812	-0.292116	-0.115721	0.0284761	17
6984824	Cdh11	0	-0.344509	-0.260377	0.201069	0.220048	17
6988230	Siae	0	-0.332733	-0.210319	0.0538971	0.0339376	17
7013294	Pou3f4	0	-0.513942	-0.318373	-0.117035	-0.150055	17
6772550	Pde7b	0	-0.329085	-0.230267	-0.0411251	0.12756	18
6782702	Vtn	0	-0.325273	-0.241648	0.0601929	0.340614	18
6824266	Bmp4	0	-0.361767	-0.28635	0.146401	0.251509	18
6833478	Hoxc6	0	-0.378223	-0.291159	-0.132842	0.122798	18
6844952	Atp13a5	0	-0.557422	-0.461893	-0.24035	0.428145	18
6867947	Slc22a8	0	-0.664356	-0.534876	-0.354227	0.218547	18
6878739	Aplnr	0	-0.522471	-0.275605	-0.048799	0.132408	18
6935197	Gpr146	0	-0.374362	-0.190831	0.0402006	0.169154	18
6946750	A930038C07Rik	0	-0.480601	-0.3714	-0.0467642	0.262659	18
6985005	Lcat	0	-0.271027	-0.153709	-0.0610895	0.106036	18
6999674	Slc6a20a	0	-0.583579	-0.350398	0.090787	0.675028	18
6755154	1700009P17Rik	0	-0.0767233	-0.22518	0.182312	0.348131	18
6757035	Eya1	0	-0.161506	-0.213004	0.0934978	0.476959	18
6780811	Adamts2	0	-0.227992	-0.185736	0.142778	0.309023	18
6818153	Gdf10	0	-0.154104	-0.145339	0.0245638	0.463093	18
6826205	AU021034	0	-0.248412	-0.124016	0.0567214	0.396091	18
6828642	Ranbp3l	0	-0.347243	-0.366164	0.318526	0.992179	18
6829612	Pgcp	0	-0.190339	-0.240242	0.20208	0.301429	18
6845943	Boc	0	-0.144514	-0.0985323	0.0961085	0.340672	18
6872980	Rbp4	0	-0.231604	-0.180644	0.110309	0.639271	18
6877990	Cybrd1	0	-0.164261	-0.088026	0.0429951	0.384059	18
6883186	Eya2	0	-0.111469	-0.107772	0.0512919	0.373206	18
6928965	Sema3c	0	-0.123177	-0.138789	-0.0203112	0.32127	18
6944262	Foxp2	0	-0.202154	-0.186123	0.107981	0.314449	18
6949591	Slc6a13	0	-0.237774	-0.228973	0.197524	0.603525	18
6952679	Slc13a4	0	-0.365736	-0.245313	0.168749	0.83706	18
6971649	Cpxm2	0	-0.354936	-0.24818	0.213163	0.47913	18
6997764	Zic1	0	-0.198882	-0.23921	0.159511	0.292257	18
6785463	Npb	0	-0.193192	-0.107619	-0.205627	-0.442464	19
6878840	Olfr153	0	-1.05435	-0.0969588	-0.980352	-1.33863	20
6892800	Jph2	0	-0.601077	-0.206321	-0.701536	-0.00226344	21
6969910	Art1	0	-0.874722	-0.184723	-0.472202	-0.203274	21
6751613	Olfr1413	0	-0.420161	-0.138518	-0.697863	-0.0995554	21
6790670	Nog	0	-1.04841	-0.390289	-0.101517	-0.236471	23
6805058	2810021B07Rik	0	-0.525776	-0.01338	0.134938	-0.01338	23
6861458	Apcdd1	0	-0.667624	-0.077452	-0.0234038	0.0183907	23
6864368	Gpr17	0	-0.485025	-0.192016	0.0590838	-0.0746611	23
6905422	P2ry13	0	-0.420009	0.148249	0.195513	0.250871	23
6905424	P2ry12	0	-0.455633	0.00552183	0.00951621	0.0690152	23
6941182	Tmem119	0	-0.739194	0.01028	0.268276	0.215585	23
6874653	Ccdc3	0	-0.296244	-0.0996036	0.00933504	0.174228	24
6928740	Abcb1a	0	-0.384984	-0.12977	0.0222566	0.339684	24
6959085	Vmn1r183	0	-0.680405	-0.338348	-0.229713	0.282152	24
6839737	Serpind1	0	-0.330588	-0.033095	0.0765555	0.573429	24
6954615	Vamp5	0	-0.688441	0.422062	0.21153	1.02217	24
6755055	Rgs5	0	-0.359019	-0.00911712	0.181534	0.0636458	25
6772802	Enpp1	0	-0.35253	-0.0329801	0.289527	0.0777107	25
6805380	Hist1h2bb	0	-0.880802	0.941323	1.06567	0.25407	25
6918852	Gpr157	0	-0.161037	0.0921507	0.462253	0.142978	25
6935150	Fam20c	0	-0.136706	0.0410201	0.296967	0.136605	25
6941183	Selplg	0	-0.312031	0.0266743	0.277733	0.116998	25
6941883	Rilpl2	0	-0.173793	0.0951771	0.544859	0.0951771	25
6962094	Tm6sf1	0	-0.109906	0.0603603	0.310662	0.0946473	25
6968683	Mfge8	0	-0.106036	0.0192524	0.317088	0.0550193	25
7013837	Srpx2	0	-0.257848	-0.102682	0.448783	0.145512	25
6758435	Slc40a1	0	-0.594087	-0.168572	0.240644	0.21067	26
6855155	H2-T10	0	-0.527798	0.357919	0.590444	0.529425	26
6892964	Pltp	0	-0.394791	-0.196226	0.170646	0.220526	26
6973527	Lair1	0	-0.513333	0.0418246	0.265029	0.155409	26
7013201	Lpar4	0	-0.396481	-0.205618	0.113062	0.204386	26
7018847	Itm2a	0	-0.322251	-0.121061	0.338407	0.280955	26
6755125	Olfml2b	0	-0.315945	-0.0709582	0.304978	0.300035	26
6755240	Slamf9	0	-0.281421	0.0424758	0.468446	0.30595	26
6770661	Csrp2	0	-0.141013	0.0511074	0.393258	0.238162	26
6776156	Plxnc1	0	-0.326022	0.0911092	0.508737	0.339937	26
6785632	Tcn2	0	-0.137936	0.0783437	0.303678	0.259398	26
6789741	Serpinf1	0	-0.254091	-0.0349931	0.478311	0.449816	26
6797090	Flrt2	0	-0.251206	-0.172905	0.236349	0.234279	26
6802989	Galc	0	-0.179679	0.0158843	0.328714	0.172549	26
6809032	Arsb	0	-0.194701	0.0982943	0.326538	0.231204	26
6811074	Gpr137b-ps	0	-0.198266	0.0315733	0.351716	0.182122	26
6820216	Rcbtb2	0	-0.193962	0.127634	0.482629	0.316307	26
6849766	Abcg1	0	-0.257716	-0.00486981	0.33291	0.182342	26
6850308	Olfr111	0	-0.58938	-0.0121178	0.939272	0.824775	26
6861358	Csf1r	0	-0.238518	0.148395	0.289088	0.278	26
6867720	Cd248	0	-0.140125	-0.013468	0.414013	0.215675	26
6872765	Acta2	0	-0.192684	0.0478936	0.565641	0.39145	26
6881139	Sirpa	0	-0.0859197	0.0772739	0.231821	0.181865	26
6899034	Crabp2	0	-0.310053	0.194301	0.639206	0.626087	26
6902880	Wls	0	-0.232691	-0.0656634	0.25719	0.242085	26
6905408	P2ry14	0	-0.359303	-0.154877	0.524965	0.427571	26
6926023	Man1c1	0	-0.108156	0.0574698	0.269978	0.214751	26
6928846	Sema3d	0	-0.111071	0.0382804	0.329445	0.241559	26
6937512	Man2b2	0	-0.112652	0.0602771	0.270165	0.219501	26
6962580	Prcp	0	-0.106301	0.0475131	0.283447	0.187569	26
6966935	Fcgrt	0	-0.228789	-0.078729	0.243466	0.284992	26
6977797	Man2b1	0	-0.199603	0.17237	0.521695	0.392998	26
6980016	Nrp1	0	-0.16551	0.13552	0.436409	0.41655	26
6983531	Ednra	0	-0.204967	0.0370445	0.332486	0.339569	26
6999456	Cx3cr1	0	-0.293027	0.184142	0.303615	0.347178	26
7010092	Gpr34	0	-0.649194	0.488085	0.7446	0.63691	26
7011936	Bgn	0	-0.157431	0.087845	0.484093	0.441892	26
6955259	Antxr1	0	-0.230286	-0.0401169	0.252212	0.301555	26
6762328	Prelp	0	-0.316383	-0.173257	0.217743	0.491751	27
6792122	Abca9	0	-0.495148	-0.0603429	0.331987	0.589583	27
6806956	Ecm2	0	-0.469676	-0.267143	0.264889	0.642804	27
6874947	Itih5	0	-0.356767	-0.140127	0.217704	0.395806	27
6949613	A2m	0	-0.446314	-0.0715948	0.222342	0.419079	27
6749115	Gulp1	0	-0.224219	-0.0266367	0.376048	0.476003	27
6763623	Fmo1	0	-0.141826	-0.0487832	0.321883	0.442093	27
6772906	Lama2	0	-0.206089	-0.03717	0.338178	0.550645	27
6884646	Itih2	0	-0.337825	-0.152759	0.59256	1.0254	27
6890903	Cpxm1	0	-0.213264	-0.0100371	0.5283	0.687056	27
6972317	Igf2	0	-0.242998	-0.184763	0.361032	0.521399	27
6751684	Sned1	0	-0.170233	-0.046266	0.148828	0.369774	27
6754027	Fam129a	0	-0.204333	0.0396426	0.282391	0.444936	27
6756238	Ptpn14	0	-0.0668318	0.0240454	0.220214	0.362434	27
6759781	Glb1l	0	-0.351504	-0.178577	0.251981	0.420739	27
6804893	Nid1	0	-0.170962	-0.0514894	0.195604	0.269119	27
6813699	Gas1	0	-0.10826	-0.0429133	0.204441	0.368099	27
6822317	Zic2	0	-0.163025	-0.0348268	0.112078	0.3247	27
6835353	Angpt1	0	-0.409958	-0.110204	0.294363	0.615699	27
6840694	Mylk	0	-0.127922	0.0847013	0.310728	0.380243	27
6852934	Ston1	0	-0.180896	0.0433496	0.232899	0.449787	27
6862448	Pard6g	0	-0.526395	-0.211489	0.157902	0.474247	27
6872791	Slc16a12	0	-0.164256	-0.0958509	0.303423	0.459191	27
6875964	Gbgt1	0	-0.206963	-0.0862358	0.207248	0.522734	27
6876081	Prrx2	0	-0.125926	0.0827024	0.296421	0.408527	27
6876567	Olfml2a	0	-0.212343	-0.0802836	0.14692	0.623741	27
6893139	Ptgis	0	-0.0621699	0.0474715	0.0915633	0.321059	27
6896353	Tnfsf10	0	-0.30577	-0.135074	0.0988346	0.579207	27
6900975	Arhgap29	0	-0.134158	0.0362588	0.237921	0.36542	27
6913039	Reck	0	-0.156429	-0.00971524	0.0733123	0.372006	27
6913269	Col15a1	0	-0.220835	-0.0835309	0.217624	0.405199	27
6968200	Nr2f2	0	-0.109196	-0.00421643	0.202974	0.261762	27
6977016	Isyna1	0	-0.252764	-0.0879888	0.191445	0.290458	27
6979575	Foxc2	0	-0.301984	-0.0580453	0.156029	0.501955	27
6990569	Bmp5	0	-0.279162	-0.0623953	0.421397	0.575582	27
6764007	Hsd17b7	0	0.056421	-0.0801053	-0.373169	-0.293978	29
6747354	St18	0	0.000930254	-0.231461	-0.34728	-0.153005	30
6750532	Pnkd	0	-0.0992051	-0.26116	-0.455095	-0.191845	30
6750570	Cdk5r2	0	-0.0521062	-0.142112	-0.294999	-0.11589	30
6753295	Syt2	0	-0.148193	-0.346908	-0.694551	-0.252238	30
6754102	Nmnat2	0	0.0101691	-0.0906107	-0.312358	-0.128508	30
6755757	Cnih3	0	-0.0579036	-0.164841	-0.501047	-0.164841	30
6759789	Ptprn	0	-0.0306775	-0.0993729	-0.257207	-0.139022	30
6759997	Scg2	0	0.0494631	-0.0606549	-0.338876	-0.0987049	30
6760754	Kif1a	0	-0.0341895	-0.0979045	-0.274617	-0.105513	30
6762234	Cntn2	0	-0.0859602	-0.18167	-0.365306	-0.141209	30
6763991	Rgs4	0	-0.0451632	-0.206674	-0.343065	-0.150729	30
6764046	Pcp4l1	0	-0.0679574	-0.152331	-0.380796	-0.133364	30
6764349	Rgs7	0	-0.0365505	-0.255046	-0.509716	-0.151623	30
6765313	Syt14	0	-0.0830439	-0.361162	-0.547342	-0.219057	30
6765504	Rgs17	0	-0.0418739	-0.215733	-0.515662	-0.172172	30
6766862	6330407J23Rik	0	-0.033774	-0.133641	-0.32587	-0.164434	30
6767088	Tspyl4	0	-0.0839916	-0.218847	-0.389061	-0.128911	30
6768609	Ank3	0	-0.0456003	-0.130009	-0.309948	-0.125235	30
6768783	Zwint	0	-0.00299739	-0.0717825	-0.235648	-0.0837239	30
6774704	Zfp365	0	-0.0320288	-0.108743	-0.262538	-0.112503	30
6777921	Kif5a	0	-0.0422409	-0.132353	-0.411432	-0.180503	30
6782201	Wscd1	0	-0.00467722	-0.0827236	-0.28331	-0.159992	30
6784246	Cntnap1	0	-0.1473	-0.34901	-0.662042	-0.243458	30
6784343	Rundc3a	0	-0.0220877	-0.0964636	-0.307927	-0.123258	30
6785669	Cabp7	0	-0.0788268	-0.200047	-0.431441	-0.137855	30
6785684	Nefh	0	-0.0864731	-0.186641	-0.378441	-0.153415	30
6788657	Guk1	0	-0.055224	-0.104963	-0.252391	-0.111307	30
6791765	Nsf	0	-0.0719897	-0.159728	-0.311565	-0.116128	30
6791856	Cyb561	0	-0.0551464	-0.147013	-0.38459	-0.16204	30
6792030	Cacng5	0	0.0147622	-0.114199	-0.402937	-0.151302	30
6792708	Nptx1	0	-0.0969366	-0.240208	-0.566104	-0.240208	30
6792786	Pcyt2	0	-0.0543049	-0.173943	-0.305197	-0.178625	30
6795078	Akap6	0	-0.0682685	-0.125389	-0.376411	-0.127949	30
6797496	Chga	0	-0.133798	-0.295304	-0.583607	-0.227234	30
6801507	Trim9	0	-0.0684517	-0.143525	-0.33159	-0.129033	30
6809148	F2rl2	0	0.0865864	-0.331052	-0.528783	-0.148819	30
6809806	Sgtb	0	-0.0858411	-0.202956	-0.455692	-0.145765	30
6810563	Hcn1	0	0.000213103	-0.127343	-0.477971	-0.15519	30
6811806	Nrsn1	0	-0.0484168	-0.159348	-0.399371	-0.0913798	30
6812375	Nrn1	0	-0.13029	-0.374625	-0.693064	-0.242451	30
6813172	Shc3	0	-0.0163574	-0.162217	-0.330038	-0.134987	30
6813348	Sncb	0	-0.106378	-0.221406	-0.512933	-0.211231	30
6815027	Rasgrf2	0	-0.0224572	-0.0897733	-0.363696	-0.116463	30
6819974	Nefl	0	-0.0477198	-0.106064	-0.335283	-0.104464	30
6820282	Htr2a	0	-0.0327319	-0.191775	-0.517208	-0.149301	30
6823100	Usp54	0	-0.0435566	-0.0898599	-0.325433	-0.123117	30
6825302	Fdft1	0	-0.00320998	-0.09869	-0.350165	-0.182968	30
6825573	Nefm	0	-0.0539765	-0.109807	-0.321672	-0.133986	30
6826081	Serp2	0	-0.061021	-0.184708	-0.424325	-0.204424	30
6829967	Rims2	0	-0.108541	-0.217212	-0.520082	-0.174735	30
6830761	Sqle	0	-0.0952196	-0.249531	-0.589078	-0.367842	30
6831528	4930572J05Rik	0	-0.105711	-0.315076	-0.590801	-0.263805	30
6832092	Mchr1	0	0.167013	-0.16218	-0.682432	-0.293636	30
6833276	Slc4a8	0	-0.0361287	-0.125198	-0.368817	-0.11138	30
6836991	Cacng2	0	-0.126842	-0.30918	-0.690932	-0.231692	30
6837006	Pvalb	0	0.0747535	-0.210049	-0.671311	-0.180036	30
6837785	Mapk11	0	-0.0192212	-0.159974	-0.387574	-0.2289	30
6837925	Kif21a	0	-0.0509484	-0.113259	-0.342723	-0.110141	30
6838460	Faim2	0	-0.0975305	-0.279035	-0.492765	-0.171145	30
6839944	Vwa5b2	0	-0.112013	-0.294296	-0.559632	-0.269365	30
6843491	B3galt5	0	0.0483406	-0.129024	-0.44943	-0.203185	30
6843500	Pcp4	0	-0.0562912	-0.18251	-0.367564	-0.165351	30
6844955	Atp13a4	0	0.12773	-0.118186	-0.514552	-0.100263	30
6849515	Pacsin1	0	-0.125475	-0.269666	-0.562643	-0.21469	30
6850131	Atp6v1g2	0	-0.072265	-0.172579	-0.388807	-0.202226	30
6850540	Rcan2	0	-0.0304705	-0.102894	-0.242526	-0.0829662	30
6854400	Mapk8ip3	0	-0.0413664	-0.125798	-0.34452	-0.127535	30
6855225	Mog	0	0.00112576	-0.110687	-0.272248	-0.15826	30
6857834	Prepl	0	-0.0652647	-0.173863	-0.313906	-0.0971875	30
6859971	Reep2	0	-0.0987894	-0.183414	-0.457519	-0.220091	30
6860224	Rell2	0	-0.115094	-0.22285	-0.632027	-0.210358	30
6861547	St8sia3	0	-0.0523582	-0.26136	-0.619388	-0.200721	30
6862281	St8sia5	0	-0.0532508	-0.109561	-0.408215	-0.211031	30
6867379	9330132A10Rik	0	-0.0728287	-0.238329	-0.389755	-0.111997	30
6867685	Spnb3	0	0.00631058	-0.1556	-0.45861	-0.135508	30
6867859	Pygm	0	0.00553576	-0.13551	-0.291875	-0.067963	30
6869801	Golga7b	0	0.00997253	-0.137837	-0.362362	-0.0964159	30
6873127	Opalin	0	-0.00435264	-0.165983	-0.311913	-0.181096	30
6875564	Gpr158	0	0.00125691	-0.128541	-0.47623	-0.15948	30
6875582	Gad2	0	-0.058802	-0.245319	-0.571043	-0.148272	30
6876109	Ncs1	0	-0.0721846	-0.220263	-0.432837	-0.192574	30
6876943	Kif5c	0	-0.0345322	-0.119558	-0.422046	-0.155418	30
6880467	Disp2	0	-0.116533	-0.259759	-0.591457	-0.204402	30
6881459	6330527O06Rik	0	-0.0525809	-0.259658	-0.662912	-0.187252	30
6881488	Snap25	0	-0.0234812	-0.0684326	-0.186123	-0.0471782	30
6881771	Pcsk2	0	-0.143785	-0.349856	-0.726159	-0.216671	30
6882615	Epb4.1l1	0	-0.0651853	-0.144587	-0.319661	-0.124838	30
6882762	Slc32a1	0	-0.129877	-0.272353	-0.536992	-0.20375	30
6883013	Gdap1l1	0	-0.0740709	-0.0858275	-0.37445	-0.184094	30
6883127	Slc12a5	0	-0.143073	-0.30795	-0.583331	-0.216308	30
6885399	Grin1	0	-0.12744	-0.358925	-0.65179	-0.251183	30
6885871	Dnm1	0	-0.0813554	-0.21292	-0.401498	-0.150189	30
6885879	Slc25a25	0	-0.0262517	-0.1273	-0.341528	-0.101181	30
6885912	Stxbp1	0	-0.0653915	-0.173187	-0.384246	-0.139197	30
6888834	Mapk8ip1	0	-0.0453429	-0.105541	-0.246214	-0.0990629	30
6890710	Mal	0	-0.0358482	-0.121907	-0.262207	-0.132312	30
6894281	Stmn3	0	-0.0416808	-0.162745	-0.390518	-0.121054	30
6895589	Stmn2	0	-0.0117231	-0.06177	-0.213669	-0.103554	30
6899743	Sv2a	0	-0.0564998	-0.151871	-0.373956	-0.169698	30
6901084	Tram1l1	0	-0.037638	-0.258716	-0.344048	-0.152986	30
6903983	Slc7a14	0	-0.0458075	-0.146745	-0.527519	-0.188029	30
6904100	Pex5l	0	0.00685499	-0.131172	-0.373788	-0.15067	30
6906698	Hapln2	0	-0.00139595	-0.0666008	-0.312643	-0.184056	30
6907148	Mllt11	0	-0.0208714	-0.128867	-0.31703	-0.121577	30
6908748	Tmem56	0	-0.0660737	-0.184022	-0.540071	-0.144795	30
6911575	Clvs1	0	-0.0174068	-0.227709	-0.469382	-0.199193	30
6916089	Dhcr24	0	-0.0761811	-0.248569	-0.558736	-0.286257	30
6919012	Acot7	0	-0.0173817	-0.0845049	-0.234269	-0.114693	30
6922895	Ttc39b	0	-0.0578087	-0.221917	-0.397756	-0.14885	30
6925381	Ncdn	0	-0.0810265	-0.149365	-0.373522	-0.143952	30
6925872	Gpr3	0	-0.00999566	-0.241402	-0.37705	-0.28871	30
6926976	Slc25a33	0	-0.0615475	-0.167189	-0.457117	-0.157579	30
6927060	Slc45a1	0	-0.0873519	-0.231393	-0.548395	-0.220356	30
6928759	9330182L06Rik	0	-0.0137392	-0.166603	-0.442857	-0.198802	30
6929828	Nat8l	0	-0.106386	-0.330433	-0.540707	-0.243845	30
6929995	Ppp2r2c	0	-0.0765172	-0.188184	-0.387492	-0.147326	30
6932224	Rufy3	0	-0.0859231	-0.20376	-0.36226	-0.133123	30
6935927	Cyp51	0	-0.0824043	-0.270407	-0.505748	-0.323281	30
6937084	Fndc4	0	0.100453	-0.0456914	-0.34108	-0.149892	30
6940535	Mapk10	0	-0.0801749	-0.180229	-0.379643	-0.121	30
6940928	Cplx1	0	-0.0866163	-0.186473	-0.445852	-0.153761	30
6941130	Sez6l	0	0.0155642	-0.106965	-0.369751	-0.193609	30
6941661	Rph3a	0	-0.0911673	-0.223322	-0.51296	-0.198408	30
6941913	Ccdc92	0	-0.0280446	-0.0900219	-0.361544	-0.145883	30
6942655	Prkar1b	0	-0.0450393	-0.13485	-0.344796	-0.112192	30
6943230	Katnal1	0	-0.0495941	-0.182049	-0.266856	-0.0961395	30
6943310	Hsph1	0	-0.0389657	-0.135126	-0.256241	-0.126259	30
6943889	Dync1i1	0	-0.143835	-0.324338	-0.773028	-0.233759	30
6947586	Add2	0	-0.0616207	-0.133312	-0.414883	-0.133312	30
6949856	Vamp1	0	-0.0694221	-0.182379	-0.409428	-0.116096	30
6951525	Asns	0	-0.0276283	-0.10881	-0.351136	-0.154138	30
6953993	Nap1l5	0	-0.0394274	-0.131655	-0.346797	-0.0934677	30
6956592	Atp2b2	0	-0.109992	-0.300149	-0.524643	-0.206155	30
6957107	Clstn3	0	-0.0871499	-0.270285	-0.545992	-0.19702	30
6957125	Eno2	0	-0.0774315	-0.185725	-0.398923	-0.155889	30
6959000	Rtn2	0	-0.0797438	-0.144932	-0.408434	-0.15125	30
6960456	Kcnc1	0	-0.17404	-0.460383	-0.754885	-0.261992	30
6960627	Slc6a5	0	-0.110594	-0.325243	-0.57815	-0.223821	30
6960692	Slc17a6	0	-0.0860979	-0.251212	-0.608329	-0.191694	30
6962873	Mtap6	0	-0.048026	-0.138957	-0.391325	-0.152428	30
6964259	Sez6l2	0	-0.0725762	-0.153541	-0.382433	-0.141445	30
6966324	Mag	0	-0.0267235	-0.0681836	-0.232422	-0.150557	30
6967109	Ptpn5	0	-0.0343365	-0.176582	-0.423156	-0.208599	30
6967584	Gabrg3	0	-0.0173261	-0.206905	-0.462159	-0.164848	30
6967726	Snrpn	0	-0.074254	-0.161925	-0.358348	-0.124381	30
6968829	Ap3b2	0	-0.115874	-0.240882	-0.504334	-0.210417	30
6971403	Stx1b	0	-0.064104	-0.162643	-0.453508	-0.15007	30
6972203	Cend1	0	-0.0698338	-0.18839	-0.409727	-0.145501	30
6973228	Syt5	0	-0.0861639	-0.22517	-0.523814	-0.139088	30
6974114	Mcf2l	0	-0.0734948	-0.141473	-0.367514	-0.141473	30
6974647	Ank1	0	-0.121488	-0.280745	-0.540498	-0.21025	30
6974682	Zmat4	0	-0.163463	-0.344922	-0.677954	-0.259584	30
6976645	Spock3	0	-0.122798	-0.281969	-0.551237	-0.176274	30
6977032	Rab3a	0	-0.0961217	-0.243391	-0.450606	-0.133603	30
6978263	Gnao1	0	-0.0332717	-0.0952844	-0.218609	-0.0824417	30
6978390	Ndrg4	0	-0.0856754	-0.212044	-0.461974	-0.14623	30
6979527	6430548M08Rik	0	-0.0556826	-0.134348	-0.313247	-0.1214	30
6982921	Sc4mol	0	-0.0598072	-0.197921	-0.447812	-0.254755	30
6983193	Tmem59l	0	-0.0769351	-0.224182	-0.451849	-0.14541	30
6988153	Fez1	0	-0.0654224	-0.184675	-0.327218	-0.138042	30
6988592	Pvrl1	0	-0.040693	-0.0553543	-0.303332	-0.162158	30
6988714	Scn4b	0	-0.203293	-0.421459	-1.16043	-0.336551	30
6991090	Rwdd2a	0	-0.065242	-0.33755	-0.629835	-0.140692	30
6991261	Rasgrf1	0	-0.0633768	-0.202013	-0.442625	-0.139938	30
6991531	Paqr9	0	-0.188595	-0.438948	-0.877312	-0.330319	30
6993756	S1pr5	0	-0.0817401	-0.159105	-0.408199	-0.180906	30
6994790	AW551984	0	0.0140125	-0.232195	-0.534018	-0.178594	30
6994935	Sc5d	0	-0.0316941	-0.186736	-0.381454	-0.222643	30
6997712	Morf4l1	0	-0.0291515	-0.099987	-0.235656	-0.0572792	30
7009774	Syp	0	-0.0982753	-0.208865	-0.441052	-0.170751	30
7011861	Gpr50	0	0.250433	-0.500222	-0.915758	-0.557851	30
7012561	Pcyt1b	0	-0.0864443	-0.200085	-0.501871	-0.235774	30
7012866	Gjb1	0	0.0214652	-0.0411878	-0.367583	-0.169727	30
7014268	Pak3	0	-0.0489292	-0.144329	-0.392716	-0.124474	30
7014406	Htr2c	0	-0.156959	-0.373568	-0.647209	-0.213727	30
7017690	Rab39b	0	-0.0531294	-0.156162	-0.37803	-0.156162	30
7018634	Nap1l2	0	-0.127971	-0.275211	-0.562237	-0.240119	30
7019607	Bex2	0	-0.0703035	-0.20097	-0.532872	-0.188396	30
7020154	Tro	0	-0.102182	-0.20772	-0.460548	-0.172438	30
7020162	Gnl3l	0	-0.0515071	-0.15457	-0.294487	-0.0954915	30
7020169	Tsr2	0	0.0291607	-0.131749	-0.305897	-0.0297312	30
7022815	Srebf2	0	-0.0267682	-0.116335	-0.264431	-0.117401	30
6755559	Efcab2	0	-0.168869	-0.267463	-0.506508	-0.00813523	33
6881337	Chgb	0	-0.111694	-0.247936	-0.371096	-0.0204991	33
6881870	Slc24a3	0	-0.127001	-0.315609	-0.328224	-0.0139806	33
6887234	Fign	0	-0.23554	-0.509035	-0.532138	0.010786	33
6949853	Mrpl51	0	-0.219566	-0.897811	-0.700456	-0.181486	33
6969811	Mrpl48	0	-0.128405	-0.537135	-0.908644	-0.0510633	33
7020664	Grpr	0	-0.240687	-0.529177	-0.631099	-0.0631397	33
6991976	Anapc13	0	0.012165	-0.190057	-0.0281884	-0.34287	34
6964245	Gdpd3	0	-0.133067	-0.788065	0.192043	0.083705	35
6802727	Dio2	0	0	-0.341914	0.0379033	0.159534	36
6877593	Slc4a10	0	-0.0961973	-0.274874	-0.147534	0.199596	36
6976790	Npy1r	0	-0.0996164	-0.405318	-0.243646	0.256955	36
6834025	Npr3	0	-0.00313058	-0.185248	-0.00313058	0.397954	36
6986000	Kcnma1	0	-0.0483972	-0.0866943	-0.407936	-0.4436	38
6790579	Lpo	0	0.0531942	-0.064673	-0.422048	-0.0918781	39
6792427	C630004H02Rik	0	-0.060124	-0.0611265	-0.330173	-0.0611265	39
6796060	Dbpht2	0	-0.0878055	-0.168504	-0.630691	-0.100804	39
6806039	Serpinb1b	0	-0.0250293	-0.159224	-0.554863	-0.0818317	39
6823798	Slc18a3	0	-0.169652	-0.155052	-0.78211	-0.234848	39
6844649	Sst	0	-0.0957469	-0.170149	-0.484443	-0.120737	39
6848583	Prr18	0	-0.0764009	-0.183025	-0.596373	-0.173643	39
6876207	Pip5kl1	0	-0.0928416	-0.119738	-0.410527	-0.119738	39
6878038	Rapgef4	0	-0.0728892	-0.160699	-0.522411	-0.159008	39
6878265	Hoxd10	0	0.0287968	-0.0724055	-0.371109	-0.0869873	39
6885015	H2afb1	0	-0.0301744	0.0211943	-0.463538	0.132617	39
6891898	Napb	0	-0.0184171	-0.12621	-0.409149	-0.0838428	39
6893131	Kcnb1	0	-0.126234	-0.149833	-0.435631	-0.0872851	39
6918901	Uts2	0	-0.0532055	-0.0744781	-0.614525	-0.195953	39
6936791	5031410I06Rik	0	-0.215157	-0.142664	-0.497166	-0.0168385	39
6957352	BC048546	0	-0.251976	-0.292821	-1.03447	-0.262265	39
6970384	Nrip3	0	-0.0807653	-0.170715	-0.526755	-0.155414	39
6979318	Vat1l	0	-0.015415	-0.0936885	-0.368303	-0.0757229	39
6998707	P4htm	0	-0.0939861	-0.133888	-0.432185	-0.133888	39
6850135	H2-D1	0	0.168117	0.416682	0.498967	-2.06789	40
6764864	9630028B13Rik	0	0.00858156	-0.0414271	0.0660573	0.593994	41
6766579	Vnn1	0	0.0684105	0.00474806	0.184846	0.68438	41
6770901	Tspan8	0	0.0888728	0.0888728	0.188086	0.915106	41
6773020	Rspo3	0	-0.113447	-0.223411	-0.0542658	0.413867	41
6783338	Mpo	0	0.0256192	0.118714	0.118714	0.482675	41
6792114	Abca8a	0	-0.141238	0.0158079	0.103545	0.919352	41
6794513	Sostdc1	0	-0.0555821	0.0269358	0.135965	0.643963	41
6833311	Nr4a1	0	0.00887871	-0.00620329	0.0874315	0.349852	41
6849968	H2-Eb1	0	0.244541	0.0195418	0.244541	0.938231	41
6856290	C3	0	-0.149148	-0.156539	0.0349452	0.579295	41
6867948	Slc22a6	0	0	-0.159387	-0.004484	0.549093	41
6868110	Ms4a4d	0	0.182888	-0.0115273	0.182888	0.983849	41
6871879	Pcsk5	0	-0.100307	-0.112166	0	0.419912	41
6874639	Ucma	0	-0.122142	-0.0515269	0.0874526	0.605168	41
6915096	Adamtsl1	0	0.0704536	0.0760109	0.138597	0.482919	41
6932487	Art3	0	0.0730667	0.00265675	0.0730667	0.545488	41
6932571	Cxcl13	0	0.0957721	0.154469	0.154469	1.02441	41
6937426	Cpz	0	0.0152877	-0.0441224	0.0764544	0.477774	41
6937812	Fgfbp1	0	0	-0.0982313	-0.00783765	0.630821	41
6949593	Slc6a12	0	-0.087904	-0.0809301	0	0.743433	41
6957111	C1s	0	0.0691948	0.0865391	0.308698	1.19706	41
6958232	Ifltd1	0	-0.0593469	-0.164412	0.087838	0.947417	41
6966039	Ltbp4	0	-0.117166	-0.0192904	0	0.343084	41
6992482	Ltf	0	0.0828814	0.137079	0.162934	0.537864	41
6996124	Thsd4	0	-0.185244	-0.121717	0.0942091	0.700958	41
7018664	Slc16a2	0	-0.0443703	-0.0186213	0.0408303	0.287939	41
7019944	Chrdl1	0	0.0184816	0.0631816	0.0635843	0.462513	41
6749835	Cd28	0	0.129758	0.232039	0.979613	0.295594	42
6753067	Ctse	0	0.0445586	-0.191246	0.676149	0.12037	42
6760339	Zfp617	0	0.0542204	0.0906219	0.828298	-0.107257	42
6766470	Raet1e	0	0.212776	0.212776	1.03749	0.172414	42
6767089	Col10a1	0	0.154526	-0.113182	1.54302	-0.00676239	42
6769343	Tdg	0	0.124172	0.0391782	0.848436	0.016675	42
6775838	Dram1	0	0.0612533	0.0927567	0.528379	0.178452	42
6815058	Thbs4	0	0.010736	0.010736	0.386666	-0.0614484	42
6831164	Wisp1	0	0.0961864	0.0961864	0.42967	0.117396	42
6840101	Kng1	0	0.189189	0.200554	0.875049	0.317553	42
6841140	Cd200r4	0	0.00186816	0.00186816	1.09573	-0.0584445	42
6841372	C330027C09Rik	0	0.0537446	0.341698	0.752729	0.0502011	42
6843419	Kcnj15	0	-0.0131825	-0.00930899	0.508183	0.137145	42
6845025	Lrrc15	0	0.0417129	0.015407	0.784011	-0.0228364	42
6853780	Igf2r	0	-0.109488	-0.0153503	0.325229	0.0476503	42
6866364	Mc2r	0	0.0790282	0.0790282	0.876892	0.0683643	42
6877909	Dhrs9	0	0.0361809	0.24357	0.81119	0.123927	42
6878406	Gm14461	0	0.106972	0.0146788	0.896371	0.329799	42
6902179	Mcoln3	0	0.18726	0.0934651	1.20459	0.536972	42
6914007	Orm1	0	0.0909087	0.120756	1.13827	0.222847	42
6926504	Tmem51	0	0.117076	0.117076	0.611735	0.106682	42
6955035	Actg2	0	0.103407	0.0816767	1.0241	0.203119	42
6955171	Cml1	0	0.208851	0.283057	0.68927	-0.107439	42
6962343	Nox4	0	0.179134	0.099534	0.632507	0.248255	42
7018328	Vsig4	0	0.0738583	0.0738583	0.778274	-0.00723673	42
7018819	Zcchc5	0	-0.0804931	-0.117016	0.800135	0.057108	42
6747641	Sulf1	0	0.0144214	0.145592	0.596979	0.574398	43
6747861	Pi15	0	-0.0796901	-0.0262425	0.557417	0.483553	43
6747871	Crispld1	0	-0.124668	-0.123079	0.456862	0.543101	43
6749073	1500015O10Rik	0	-0.11496	0.0718926	0.622563	0.737556	43
6754325	Angptl1	0	0.0851211	0.032584	0.704675	0.533529	43
6754735	Dpt	0	-0.260347	-0.208548	0.709741	0.752256	43
6758261	Fhl2	0	-0.117985	0.00515677	0.467797	0.52869	43
6766605	Moxd1	0	-0.150406	0.00573143	0.718456	0.829764	43
6775182	Col6a2	0	-0.0651782	0.0232049	0.439023	0.47128	43
6775185	Col6a1	0	0.00291467	0.172121	0.698805	0.7233	43
6777994	Rbms2	0	0.0182137	0.0486295	0.286158	0.216678	43
6781515	Mfap4	0	-0.260791	-0.237216	0.61115	0.556919	43
6784062	Igfbp4	0	0.0232494	0.079469	0.337802	0.419728	43
6784564	Mrc2	0	-0.144097	-0.0078443	0.46463	0.568583	43
6793283	Osr1	0	-0.133199	-0.0228948	0.628843	0.855117	43
6794550	Meox2	0	0.0362493	-0.0613794	0.488498	0.598169	43
6795904	Dact1	0	-0.208958	-0.311128	0.359345	0.467299	43
6799874	Hbp1	0	-0.118463	-0.0604358	0.302157	0.178991	43
6805134	Sfrp4	0	-0.18528	0.0931559	1.14574	1.2067	43
6806036	Serpinb9	0	-0.0155054	-0.0287142	0.471735	0.430523	43
6806958	Aspn	0	-0.240821	-0.0838348	1.32582	0.699157	43
6822367	Itgbl1	0	-0.227517	-0.165147	0.961961	1.13849	43
6828741	C1qtnf3	0	-0.263319	-0.212757	1.03243	0.607206	43
6830506	Col14a1	0	-0.112687	0.126498	0.97231	0.801619	43
6832351	Fbln1	0	-0.240388	-0.150308	0.464836	0.481342	43
6839624	Snai2	0	-0.0748834	-0.11261	0.458972	0.372729	43
6840818	Fstl1	0	0.00831967	0.0264771	0.363339	0.265177	43
6846440	Tmem45a	0	-0.0649496	0.0144213	0.694565	0.404982	43
6846670	Epha3	0	-0.224658	-0.117984	0.821088	0.732599	43
6848761	Smoc2	0	-0.0193135	0.015374	0.70529	0.713825	43
6854962	Rab11b	0	0.048128	-0.0962431	0.493963	0.460345	43
6865792	Fbn2	0	-0.118022	-0.0850433	0.456915	0.197033	43
6866054	Fam38b	0	0.0829926	-0.0746779	0.523901	0.36054	43
6871425	Scgb1a1	0	0.366492	0.138982	1.60954	1.12418	43
6872739	Lipo1	0	0.0848767	0.0397661	0.471402	0.330178	43
6889413	Rcn1	0	-0.00620491	0.0554182	0.485141	0.35904	43
6898686	Pdgfc	0	-0.0626785	0.0157752	0.409898	0.26768	43
6900584	Col11a1	0	-0.146839	0.0119393	0.62017	0.405416	43
6918131	Mfap2	0	-0.206042	-0.0590379	0.529883	0.505174	43
6929132	Lrrc17	0	-0.111145	-0.179298	0.524269	0.338417	43
6942380	Eln	0	-0.12422	-0.0196315	0.704505	0.444837	43
6942558	Pcolce	0	-0.22234	-0.0794604	0.591046	0.646702	43
6945339	Tmem140	0	0.139901	0.226377	0.76618	0.606547	43
6952680	Fam180a	0	-0.125952	-0.169841	0.501606	0.709774	43
6953763	Fkbp14	0	0.0100058	0.0394781	0.377478	0.283951	43
6957141	Cd4	0	0.00242836	-0.0278382	0.544255	0.408052	43
6964382	Itgax	0	0.181076	0.354601	1.2495	1.13619	43
6965982	Axl	0	0.0470464	0.0837806	0.250334	0.276727	43
6966857	Clec11a	0	0.138236	-0.0850832	0.440522	0.506718	43
6971410	Prss53	0	0.0249818	0.0363937	0.240686	0.139009	43
6975661	Pdgfrl	0	-0.0386267	0.0802664	0.59768	0.557942	43
6977093	Glt25d1	0	0.0649191	0.0433488	0.318463	0.175702	43
6986722	Mmp12	0	0.0998897	0.32304	1.46054	1.25428	43
6989442	Stra6	0	-0.0983329	0.0754708	0.406678	0.463561	43
6989752	Itga11	0	-0.000557333	-0.0166337	0.517059	0.308816	43
6991383	Plod2	0	-0.120496	0.0913372	0.661435	0.409032	43
6995956	Islr	0	-0.251912	-0.130817	0.554077	0.685419	43
6995968	Loxl1	0	0.0430141	0.154323	0.624694	0.591994	43
7002886	Hmgcs2	0	-0.244834	-0.446845	0.568059	0.626446	43
7013835	Tnmd	0	-0.146734	-0.155809	0.820296	0.475818	43
7014085	Nrk	0	0.0411197	0.061643	0.960813	0.820981	43
6779672	Efemp1	0	0.00247991	-0.0656591	0.620827	1.02214	44
6784845	Kcnj2	0	-0.0686674	-0.0496273	0.346255	0.556657	44
6806959	Omd	0	0.0859235	0.0722854	1.02932	1.65904	44
6841712	Abi3bp	0	-0.190837	-0.360937	0.477321	0.760505	44
6887380	Scn7a	0	-0.12574	-0.0749988	0.570297	0.940965	44
6901737	Adh1	0	0.0396981	0.0412414	0.40329	0.569326	44
6969016	9930013L23Rik	0	-0.178374	-0.163632	0.42145	0.671552	44
6768618	Slc16a9	0	0.0270955	-0.0809911	0.122996	0.376743	44
6770076	Epyc	0	0.181707	0.0368658	0.353866	0.998987	44
6773169	Fam26e	0	-0.00146032	-0.0905427	0.206427	0.674768	44
6778972	Egfr	0	-0.105185	-0.137633	0.179045	0.434398	44
6784260	Aoc3	0	0.0777859	0.0659836	0.175228	0.551798	44
6788822	Slc47a1	0	0.034929	-0.0795689	0.336254	1.0821	44
6792544	St6galnac2	0	0.059445	-0.0501621	0.142971	0.354986	44
6796430	Smoc1	0	-0.111246	-0.068525	0.0816488	0.396978	44
6821304	Klf5	0	0.0580413	0.0263133	0.135713	0.388277	44
6824932	Gjb2	0	-0.11261	-0.20904	0.292299	0.563276	44
6844819	Cldn1	0	0.00741785	-0.18343	0.350648	0.775756	44
6855051	C4b	0	0.0751667	0.192663	0.303655	0.749894	44
6855062	C2	0	0.087467	0.0338213	0.365665	0.805541	44
6872204	Mamdc2	0	-0.17007	-0.110567	0.157298	0.504897	44
6884750	Itga8	0	-0.105323	-0.0713683	0.111517	0.596747	44
6887179	Dpp4	0	-0.0899681	0.0156939	0.254521	0.847544	44
6910085	Lmo4	0	0.0585262	0.034356	0.117321	0.262323	44
6915847	Lepr	0	-0.110274	-0.117554	0.324627	0.498645	44
6917153	Col8a2	0	-0.0590225	-0.0910198	0.19127	0.37392	44
6918015	Pla2g2d	0	-0.0293137	-0.0972545	0.198213	0.468224	44
6919879	Slc26a7	0	0.0695199	0.100752	0.525398	1.23834	44
6921994	Svep1	0	-0.162948	-0.0937427	0.154167	0.63825	44
6924365	Podn	0	-0.0830734	-0.0549069	0.164624	0.533647	44
6926912	Angptl7	0	-0.0280992	0.0774697	0.235539	0.520479	44
6930346	C1qtnf7	0	0.0101576	-0.227821	0.274305	0.694606	44
6949790	C1rb	0	0.0549108	-0.0379073	0.189891	0.538909	44
6960139	Siglec5	0	0.0141286	0.066812	0.246618	0.434853	44
6965426	Mrgprf	0	-0.07825	-0.226143	0.203998	0.732895	44
6986725	Mmp3	0	0.182854	0.0663144	0.341484	0.982393	44
6991368	Plscr4	0	-0.0785251	-0.0281637	0.175019	0.375026	44
6861396	Il17b	0	0.0717938	0.438807	0.112897	0.112897	46
6872834	Ankrd1	0	0.131738	0.691551	0.109171	0.0266237	46
6933627	Oasl1	0	0.151519	0.432826	0.0551271	0.103607	46
7009879	Fthl17	0	0.0433516	0.793195	0.0500774	0.0317696	46
6749701	Sgol2	0	-0.0534597	0.311321	0.427501	0.0662216	48
6763972	Nuf2	0	-0.0313571	0.52712	0.661157	0.168532	48
6787469	Hmmr	0	0.228687	1.18634	1.36542	0.342486	48
6789609	Olfr380	0	-0.284689	0.366582	0.593069	-0.58156	48
6790538	Prr11	0	-0.13725	0.456075	0.60817	0.126074	48
6792601	Tk1	0	0.028498	0.440664	0.925445	0.0117591	48
6818647	Cdkn3	0	0.0363629	0.356982	0.488293	0.0425596	48
6824346	Dlgap5	0	-0.0687636	0.454061	0.679604	0.11636	48
6855068	D17H6S56E-5	0	0.157958	0.499429	0.55931	0.099578	48
6857078	Ndc80	0	0.139184	0.43402	0.54523	-0.319595	48
6859953	Kif20a	0	-0.0136792	0.456772	0.660077	0.106183	48
6869537	Cep55	0	0.15359	0.65248	0.775883	0.194331	48
6872051	Gda	0	0.188738	0.443414	0.647235	0.102054	48
6880451	Bub1b	0	0.0847764	0.434954	0.511562	0.176042	48
6880529	Nusap1	0	0.00154132	0.696633	0.726667	0.214811	48
6882333	Tpx2	0	0.0288977	0.622899	0.688641	0.234796	48
6885287	Mastl	0	-0.0278068	0.336235	0.572451	0.0385518	48
6890715	Bub1	0	0.194906	0.877691	1.11316	0.259414	48
6890835	Ckap2l	0	0.00518342	0.603184	0.810399	0.216418	48
6898995	Cd5l	0	-0.0491236	0.594548	0.795282	-0.0192748	48
6901592	Cenpe	0	0.162497	0.737618	0.912459	0.298157	48
6903753	Ect2	0	0.00545054	0.58878	0.75395	0.248409	48
6904300	Ccna2	0	-0.0161712	0.874537	0.985727	0.384587	48
6907255	Hist2h4	0	-0.0156972	0.19948	0.406788	0.00248502	48
6924834	Kif2c	0	-0.239118	0.592697	0.694612	0.100058	48
6932368	Pf4	0	0.27095	0.797004	0.715266	0.110202	48
6945824	Olfr444	0	0.144599	0.56862	0.861623	-0.332539	48
6945831	Olfr441	0	0.309443	0.77105	1.37718	0.00316039	48
6946778	Mad2l1	0	-0.015239	0.345167	0.507852	0.110724	48
6949814	Cdca3	0	0.0528123	0.730958	0.790899	0.196502	48
6969429	4632434I11Rik	0	0.14454	0.584577	0.717489	0.0802823	48
6974126	F7	0	0.26979	0.603661	0.965458	0.0996409	48
6977696	Asf1b	0	-0.0219018	0.624867	0.762114	0.14814	48
6980158	Shcbp1	0	0.19929	0.694435	0.651476	0.100002	48
6980944	Ckap2	0	-0.0692332	0.629381	0.651296	0.189438	48
6996267	Zwilch	0	0.0972318	0.491385	0.523683	0.0895045	48
6996646	Ccnb2	0	0.00509083	0.413759	0.553283	0.137955	48
7012842	Kif4	0	0.0854645	0.484969	0.581893	0.154381	48
6993833	Spc24	0	0.0639922	0.432824	0.231992	0.0784585	48
6792814	Cbr2	0	-0.0259765	0.682471	0.758434	0.659747	49
6805382	Hist1h2ab	0	-0.256807	1.03535	1.04364	0.647231	49
6817637	Anxa11	0	-0.0120388	0.234518	0.32778	0.276003	49
6850834	Trem2	0	-0.0901149	0.598159	0.844894	0.690852	49
6899683	Ctss	0	0.0428444	0.366227	0.48807	0.423273	49
6924466	Cdkn2c	0	0.0702216	0.938382	1.09061	0.828229	49
6926166	C1qc	0	0.166268	0.626035	0.787702	0.68685	49
6954619	Vamp8	0	0.13195	0.509265	0.629704	0.536754	49
6991264	Ctsh	0	-0.0505482	0.591494	0.845219	0.750971	49
6992436	Ngp	0	-0.213176	0.640269	0.489222	0.819826	49
6954617	Vamp5	0	0.0716243	0.34461	0.308198	0.391795	49
6769535	Timp3	0	0.0533999	0.149136	0.139183	0.300546	50
6880900	Fgf7	0	0.135854	0.250142	0.248215	0.586796	50
6893532	Bmp7	0	-0.0253826	0.0807462	0.0823998	0.316737	50
6904892	Slc7a11	0	0.0691021	0.214694	0.187662	0.469711	50
6940841	Tgfbr3	0	-0.0439547	0.0985874	0.176585	0.493655	50
6953395	Rarres2	0	0.00782439	0.130372	0.176316	0.402868	50
6995158	Cd3g	0	0.0668529	0.271886	0.386745	1.00638	50
6749911	Nrp2	0	0.020759	0.115644	0.243324	0.108372	51
6753068	5430435G22Rik	0	-0.0837853	0.0876493	0.360806	0.0953607	51
6753592	Aspm	0	0.110151	0.509148	0.732888	0.22132	51
6754143	Rnasel	0	0.038163	0.174867	0.362418	0.231507	51
6754578	Dnm3os	0	0.0751345	0.129481	0.708661	0.352443	51
6754798	Creg1	0	-0.0231356	0.179309	0.389166	0.263842	51
6755216	Slamf6	0	0.115221	0.338646	0.67313	0.343506	51
6755282	Aim2	0	-0.0513468	0.491439	0.747332	0.548715	51
6760642	Col6a3	0	-0.00976946	0.189612	0.701862	0.436191	51
6761998	Zranb3	0	-0.0659914	0.331415	0.77476	0.134021	51
6762151	Ikbke	0	0.0747185	0.155083	0.460705	0.155083	51
6764089	Ly9	0	0.00106434	0.495529	0.992802	0.702548	51
6768076	Smpdl3a	0	-0.13124	0.0595335	0.413988	0.182414	51
6768155	Psap	0	-0.0275435	0.0494278	0.181152	0.11161	51
6768157	4632428N05Rik	0	-0.0817536	0.229953	0.553511	0.354996	51
6769150	Ptbp1	0	0.039053	0.154444	0.270127	0.176985	51
6769181	Hmha1	0	-0.0297494	0.166949	0.377056	0.212178	51
6770693	Osbpl8	0	-0.0708508	0.0811877	0.308838	0.12015	51
6775472	Gna15	0	-0.285526	0.297635	0.586725	0.350567	51
6778784	Ikzf1	0	-0.188749	0.224875	0.448561	0.280277	51
6781925	Pik3r5	0	0.0284108	0.191268	0.479523	0.203996	51
6782808	Adap2	0	-0.0237975	0.413554	0.722439	0.474007	51
6783785	Gngt2	0	0.071956	0.350808	0.996739	0.421683	51
6784594	Map3k3	0	-0.00426711	0.123522	0.299434	0.186099	51
6785111	Cd300a	0	0.110005	0.354691	0.961891	0.625093	51
6785799	Myo1g	0	0.0314047	0.177655	0.397215	0.177655	51
6789329	Tnfsf13	0	-0.0592838	0.333361	0.755636	0.455935	51
6789331	Tnfsf12	0	-0.0200235	0.198385	0.421463	0.2004	51
6790944	Abcc3	0	0.105893	0.500839	0.890485	0.557824	51
6791063	Abi3	0	-0.12749	0.187054	0.467148	0.263016	51
6791501	Vat1	0	0.0326276	0.13849	0.270836	0.113757	51
6792373	AF251705	0	0.0807626	0.712391	1.1964	0.865963	51
6797478	Rin3	0	0.0869762	0.257084	0.59215	0.404529	51
6798285	Pld4	0	-0.296959	0.466553	0.723338	0.458641	51
6799897	Pik3cg	0	-0.153932	0.395324	0.664577	0.491292	51
6801335	Mis18bp1	0	0.0992154	0.56819	0.991539	0.238236	51
6802349	Npc2	0	0.0148185	0.0837799	0.228928	0.0874187	51
6806034	Serpinb6b	0	-0.0356271	0.391466	0.769066	0.533329	51
6806933	Ninj1	0	-0.0109163	0.181766	0.36689	0.153843	51
6807074	Syk	0	0.0850309	0.366596	0.794677	0.426674	51
6811530	Hist1h1b	0	0.0777464	0.334274	0.477407	0.188645	51
6813876	Slc35d2	0	0.0704398	0.320184	0.677976	0.252184	51
6815522	Naip2	0	0.0952832	0.429915	0.880972	0.4611	51
6815523	Naip5	0	0.043035	0.273132	0.854956	0.351234	51
6815529	Naip7	0	0.0237666	0.351258	0.925664	0.444397	51
6817970	Nt5dc2	0	-0.0698279	0.314834	0.624134	0.273058	51
6818956	Rnase4	0	-0.0492573	0.383804	0.602602	0.42568	51
6820040	Loxl2	0	0.106255	0.293154	0.690592	0.462855	51
6825445	Ptk2b	0	0.0517335	0.219461	0.473053	0.261362	51
6831919	Kdelr3	0	0.0778358	0.284926	0.742728	0.436531	51
6832302	Parvg	0	-0.0104678	0.397246	0.621214	0.405793	51
6834560	Fam105a	0	-1.79299e-05	0.518912	0.915282	0.632163	51
6835934	Atad2	0	0.0461188	0.395283	0.65478	0.2455	51
6837022	C1qtnf6	0	0.0321311	0.159633	0.738993	0.283533	51
6837415	Nfam1	0	-0.0114901	0.205628	0.542286	0.224438	51
6841136	Cd200r1	0	0.138211	0.403302	0.988541	0.293995	51
6843178	Il10rb	0	0.0589789	0.349599	0.557091	0.428218	51
6847805	2610039C10Rik	0	0.0829423	0.261091	0.536508	0.216597	51
6849951	Myo1f	0	0.0999068	0.378958	0.706319	0.464371	51
6850831	A530064D06Rik	0	0.126433	0.295778	0.855279	0.401628	51
6851669	Man2a1	0	0.0635306	0.407267	0.707972	0.359274	51
6855829	Nfya	0	0.0671348	0.160708	0.301297	0.136402	51
6860780	Tnfaip8	0	0.0146337	0.264606	0.725779	0.338187	51
6862102	Acaa2	0	-0.0361055	0.0564024	0.328099	0.148883	51
6864789	Gnpda1	0	0.0211968	0.14353	0.346517	0.205966	51
6866233	Lman1	0	0.038889	0.135331	0.28059	0.188645	51
6868017	Rab3il1	0	-0.0336888	0.278237	0.484671	0.309465	51
6868830	Dock8	0	0.0110682	0.285978	0.522968	0.377244	51
6869503	Kif11	0	0.0173325	0.589218	0.800036	0.275543	51
6869509	Hhex	0	-0.0194022	0.174455	0.471413	0.2246	51
6870181	Gsto1	0	-0.0187024	0.0767672	0.286436	0.0757055	51
6870956	Tcirg1	0	-0.0686907	0.275821	0.571013	0.332755	51
6870958	Aldh3b1	0	-0.0210376	0.151407	0.341849	0.152365	51
6871276	Fermt3	0	0.0074958	0.34082	0.58865	0.34082	51
6872530	5033414D02Rik	0	0.0493513	0.163793	0.374475	0.163017	51
6872783	Lipa	0	-0.0601182	0.241162	0.482382	0.272738	51
6873111	Blnk	0	-0.0678166	0.322356	0.74015	0.491194	51
6878448	Itga4	0	-0.199533	0.07216	0.604199	0.278465	51
6880468	D2Ertd750e	0	0.0183247	0.437855	0.604196	0.180817	51
6880842	Slc24a5	0	-0.0963277	0.021786	0.754565	0.304592	51
6885409	Dpp7	0	-0.165779	0.100004	0.406117	0.198155	51
6886039	Stom	0	0.0622901	0.320999	0.613106	0.443741	51
6889894	Arhgap11a	0	-0.0926862	0.406088	0.673489	0.326703	51
6890658	Ncaph	0	0.0985351	0.400362	0.599803	0.1903	51
6890981	Siglec1	0	-0.0138325	0.247106	0.67452	0.36048	51
6891675	Snx5	0	0.0330394	0.124518	0.256781	0.124518	51
6892505	Rbl1	0	-0.0745424	0.178206	0.452334	0.160361	51
6894311	Rgs19	0	-0.10353	0.141004	0.354746	0.161108	51
6898171	Mfsd1	0	0.0121658	0.171444	0.303809	0.153206	51
6898241	Smc4	0	-0.00221283	0.341294	0.479583	0.234014	51
6899106	0610031J06Rik	0	-0.0554295	0.0471961	0.239854	0.122237	51
6899682	Ctsk	0	-0.184504	0.0893394	0.659347	0.286046	51
6901335	Casp6	0	0.077023	0.378927	0.690038	0.394813	51
6907137	Tnfaip8l2	0	-0.00951745	0.36174	0.613146	0.345813	51
6907222	C920021L13Rik	0	-0.109469	0.290177	0.662988	0.263263	51
6908569	Snx7	0	0.0969483	0.221425	0.441974	0.179032	51
6912042	Ggh	0	-0.046906	0.159955	0.40079	0.246987	51
6913193	1300002K09Rik	0	0.0732835	0.189691	0.646364	0.235602	51
6913499	Smc2	0	0.0103232	0.426427	0.591913	0.177924	51
6916762	Lepre1	0	-0.060771	0.145213	0.396504	0.261973	51
6920256	Fhl5	0	0.155281	0.18859	1.2002	0.58037	51
6921379	Trim14	0	0.0763662	0.203861	0.405354	0.228919	51
6922026	Ptgr1	0	-0.0173174	0.173769	0.647716	0.173769	51
6924382	Gpx7	0	0.0242672	0.0938683	0.429104	0.182156	51
6926702	Ppp2r5a	0	0.0106678	0.494169	0.737993	0.401889	51
6933065	Ibsp	0	0.0526208	0.945521	1.20676	0.556538	51
6934164	P2rx4	0	-0.000258164	0.174095	0.482091	0.305099	51
6941173	Cmklr1	0	-0.0583492	0.246507	0.534314	0.285211	51
6941423	Rfc5	0	-0.0436504	0.311001	0.41132	0.181495	51
6942192	Gusb	0	0.0501844	0.502576	0.831191	0.530291	51
6945584	Tbxas1	0	0.0489975	0.52471	0.916126	0.556156	51
6950103	Clec2i	0	0.13475	0.508964	0.850326	0.251618	51
6951401	Pon3	0	-0.0305312	0.38742	0.68544	0.49179	51
6959793	Cebpa	0	0.0613435	0.134567	0.314586	0.177509	51
6963004	Arap1	0	0.0147217	0.134951	0.313857	0.222244	51
6963744	Nucb2	0	0.0537903	0.123425	0.304856	0.172888	51
6964033	Plk1	0	0.0917124	0.565301	0.777049	0.274792	51
6965268	Lsp1	0	0.0514412	0.336631	0.703631	0.448611	51
6967211	E2f8	0	0.0277757	0.24272	0.399072	0.121224	51
6969887	Folr2	0	0.162553	0.586586	0.918573	0.33017	51
6971121	Arhgap17	0	-0.00177205	0.123521	0.286871	0.169188	51
6971287	Coro1a	0	0.0301406	0.253674	0.310919	0.199926	51
6971848	Mki67	0	-0.397687	0.575156	0.83041	0.141105	51
6972411	Tnfrsf26	0	0.153263	0.272675	0.78668	0.318131	51
6972501	Tpcn2	0	0.069397	0.202946	0.475238	0.253585	51
6973689	Stxbp2	0	-0.148392	0.136122	0.358653	0.152559	51
6977019	Lrrc25	0	-0.0671721	0.53538	1.11574	0.59409	51
6977775	Dnase2a	0	0.0218989	0.263345	0.508047	0.266656	51
6979439	Plcg2	0	-0.0754452	0.224119	0.504514	0.257294	51
6981924	Asah1	0	0.00238612	0.130253	0.336159	0.183436	51
6983513	Arhgap10	0	0.074945	0.240422	0.502292	0.315109	51
6985943	Galns	0	0.08768	0.32699	0.730315	0.362918	51
6986719	Mmp13	0	0.228409	0.581293	1.53405	0.834883	51
6986733	Mmp8	0	0.101261	0.445123	0.754671	0.260429	51
6989769	Calml4	0	0.110743	0.184018	0.6388	0.345774	51
6989985	Ppib	0	0.0391095	0.101887	0.216438	0.115333	51
6994431	Fli1	0	0.0304203	0.346137	0.564313	0.367195	51
6994678	Slc37a2	0	0.186612	0.506396	1.0157	0.362136	51
6995999	Cd276	0	0.0448419	0.115958	0.418899	0.205631	51
6996186	Kif23	0	0.0732222	0.475839	0.763098	0.213397	51
6997671	Tmed3	0	0.0514616	0.160526	0.34683	0.173462	51
6998919	Ccrl2	0	-0.0325078	0.208906	0.714113	0.426379	51
6999147	Cmtm7	0	-0.165946	0.185098	0.473232	0.227417	51
7011035	Sash3	0	-0.00369358	0.228799	0.466509	0.228799	51
7013184	Atp7a	0	-0.00833588	0.180649	0.461146	0.282778	51
7013252	Sh3bgrl	0	0.0507325	0.09744	0.271211	0.124098	51
7015447	Was	0	0.0365635	0.194055	0.490322	0.331757	51
7017604	Renbp	0	0.0651314	0.439444	0.775387	0.518092	51
7017621	Dnase1l1	0	0.122525	0.460375	0.913719	0.552333	51
7017628	Slc10a3	0	0.0911536	0.161462	0.494754	0.33557	51
7017668	Mpp1	0	-0.0386444	0.0910368	0.242396	0.0622676	51
7019518	Btk	0	0.101655	0.656916	1.03915	0.614782	51
7019519	Gla	0	0.112217	0.271843	0.555488	0.189875	51
7020371	Prdx4	0	0.00953948	0.171941	0.361889	0.191496	51
6748886	Il1rl2	0	0.0679293	0.307499	0.525198	0.43181	52
6749142	Col3a1	0	-0.0387116	0.272155	0.848772	0.746273	52
6753084	Rab7l1	0	0.0344898	0.108605	0.370392	0.291539	52
6758414	Col5a2	0	0.00902159	0.284233	0.810391	0.639354	52
6759664	Igfbp5	0	-0.145665	0.231776	0.511409	0.500696	52
6763208	Mr1	0	-0.121971	0.134803	0.435776	0.307637	52
6763259	Soat1	0	-0.0210801	0.210485	0.438309	0.32211	52
6765459	Cr1l	0	0.00608237	0.101714	0.341664	0.277134	52
6766301	Perp	0	-0.103886	0.285536	0.48727	0.594216	52
6766350	Ifngr1	0	0.00280766	0.115468	0.327163	0.289306	52
6767231	Lama4	0	0.0797717	0.355937	0.626311	0.616559	52
6769597	Igf1	0	-0.0811305	0.20241	0.653618	0.678425	52
6770072	Lum	0	0.181124	0.656549	1.32956	1.23171	52
6771224	Gns	0	-0.00364395	0.155741	0.344963	0.248947	52
6773174	Dse	0	-0.0656626	0.291212	0.888758	0.778819	52
6774907	Bicc1	0	0.0217856	0.264169	0.58672	0.58266	52
6775160	Mmp11	0	-0.046836	0.151473	0.690353	0.471343	52
6777310	Lyz1	0	0.0970518	0.700988	1.10964	1.01533	52
6783685	Col1a1	0	-0.144855	0.339225	0.662614	0.626885	52
6783873	Copz2	0	-0.0618519	0.139946	0.49564	0.373741	52
6784187	Fkbp10	0	0.0661796	0.255216	0.603863	0.496532	52
6784237	Naglu	0	-0.000775498	0.377273	0.793421	0.572923	52
6786673	Rel	0	0.063957	0.1311	0.368969	0.325536	52
6790655	Scpep1	0	0.0286103	0.256386	0.548421	0.447468	52
6806701	Mylip	0	0.00119197	0.190876	0.494263	0.483148	52
6809047	Lhfpl2	0	-0.0860438	0.169786	0.43408	0.307469	52
6811694	Hfe	0	-0.032169	0.308936	0.537837	0.55791	52
6812505	Txndc5	0	-0.0182394	0.0742639	0.239148	0.170264	52
6813474	Tifab	0	-0.0465068	0.254159	0.4837	0.365974	52
6815345	Hexb	0	-0.0695087	0.245752	0.420488	0.338359	52
6819153	Mmp14	0	0.0609301	0.193628	0.600381	0.473599	52
6820573	Elf1	0	-0.015494	0.222411	0.497385	0.354982	52
6823666	Prkcd	0	-0.0173987	0.197896	0.452932	0.332632	52
6824942	Cryl1	0	-0.109202	0.117641	0.385671	0.28952	52
6831606	Gsdmd	0	0.0963639	0.364699	0.758793	0.599623	52
6832848	Irak4	0	0.0516359	0.239153	0.462318	0.341946	52
6835692	Ext1	0	0.0107174	0.108779	0.276545	0.221934	52
6837435	A4galt	0	-0.0108435	0.229851	0.609164	0.629208	52
6837787	Plxnb2	0	-0.0245197	0.21949	0.405855	0.338061	52
6838450	Fmnl3	0	-0.116713	0.149075	0.350626	0.26172	52
6838492	Lima1	0	-0.0128013	0.130581	0.427343	0.409461	52
6840637	Itgb5	0	-0.136871	0.215761	0.419899	0.358214	52
6843177	Ifnar2	0	0.049193	0.163018	0.319074	0.254065	52
6846006	Phldb2	0	0.0434371	0.230682	0.737241	0.809151	52
6846468	Col8a1	0	0.123777	0.438801	1.24857	0.990636	52
6855013	Psmb9	0	0.0186582	0.216742	0.435716	0.341957	52
6858563	Svil	0	0.0479763	0.138732	0.390862	0.349204	52
6858773	Colec12	0	-0.0950512	0.323203	0.710191	0.729888	52
6864404	Gypc	0	-0.057677	0.220716	0.52656	0.61833	52
6864609	Tmem173	0	0.0266902	0.136405	0.351978	0.273425	52
6865551	Ppic	0	0.0113397	0.269024	0.76031	0.625337	52
6867615	Unc93b1	0	-0.0911535	0.338954	0.63385	0.509385	52
6869635	Entpd1	0	0.0704915	0.149403	0.364388	0.328418	52
6875666	Pnpla7	0	-0.0914845	0.0889155	0.370142	0.269974	52
6875920	Col5a1	0	-0.0685128	0.130112	0.508017	0.365234	52
6882730	Lbp	0	-0.0306484	0.352449	1.03101	1.11108	52
6883120	Ctsa	0	-0.0165933	0.100806	0.250254	0.1901	52
6887958	Nfe2l2	0	0.0172878	0.118416	0.241839	0.234155	52
6888003	Fkbp7	0	0.012714	0.227042	0.633928	0.539695	52
6888299	Tfpi	0	-0.0314575	0.263643	0.711797	0.77562	52
6890597	Fbn1	0	0.0812134	0.510393	0.923111	0.847262	52
6899249	Shc1	0	0.0234099	0.343454	0.600183	0.521549	52
6913270	Tgfbr1	0	-0.11636	0.132109	0.50158	0.421486	52
6917393	Laptm5	0	-0.0156541	0.311393	0.504548	0.396945	52
6919190	Mxra8	0	0.0950225	0.463372	0.828201	0.797868	52
6920033	Cpne3	0	0.0310553	0.199882	0.392413	0.312744	52
6923142	Ptplad2	0	0.147725	0.726847	1.22798	0.959888	52
6929653	Emilin1	0	-0.0581771	0.109459	0.406861	0.284805	52
6931227	Fam114a1	0	0.0663371	0.212723	0.602409	0.493377	52
6934119	Hvcn1	0	-0.0237455	0.315085	0.860659	0.623815	52
6934162	P2rx7	0	-0.0312532	0.236961	0.380526	0.343028	52
6937438	Htra3	0	-0.109833	0.081907	0.427925	0.369542	52
6940363	Hpse	0	0.0489599	0.616262	1.31819	1.00972	52
6943818	Col1a2	0	-0.174771	0.265328	0.633996	0.615879	52
6945335	Cald1	0	0.0641593	0.2201	0.459461	0.377713	52
6946475	Fkbp9	0	-0.0997728	0.104625	0.352572	0.385757	52
6946971	Tmem150a	0	-0.00529052	0.120507	0.345477	0.297868	52
6955268	Arhgap25	0	0.0807698	0.446204	0.806734	0.619307	52
6960516	Tmem86a	0	-0.125249	0.22798	0.545036	0.472259	52
6966808	Cd33	0	0.0765969	0.352078	0.587546	0.471201	52
6966934	Rcn3	0	0.00182593	0.214676	0.737524	0.680576	52
6966960	Cd37	0	-0.0199125	0.289992	0.56595	0.42389	52
6968735	Anpep	0	-0.10067	0.532489	1.12425	0.969977	52
6970045	Trim12c	0	0.06463	0.546729	0.877543	0.723311	52
6973586	Apoc1	0	-0.0938138	0.219643	0.78659	0.802533	52
6978229	Mmp2	0	-0.112807	0.161693	0.67281	0.587898	52
6978883	Pla2g15	0	-0.0557099	0.192119	0.505262	0.351227	52
6983799	Cd97	0	0.0851438	0.140367	0.466859	0.319543	52
6989553	Hexa	0	-0.0599926	0.284618	0.537174	0.403355	52
6990327	Aldh1a2	0	-0.227714	0.172885	0.664018	0.724916	52
6995190	Il10ra	0	-0.133121	0.133535	0.561984	0.4467	52
6999114	Crtap	0	0.0796886	0.246138	0.504119	0.420736	52
7012769	Stard8	0	-0.123896	0.101191	0.39823	0.320954	52
7020800	Tlr8	0	0.189155	1.09208	1.79117	1.39303	52
6840115	St6gal1	0	-0.0225444	0.150232	0.286591	0.336235	52
6849990	Tapbp	0	-0.00372957	0.117957	0.235871	0.284064	52
6931740	Pdgfra	0	0.00779246	0.118036	0.246668	0.268606	52
6764010	Ddr2	0	0.103842	0.328554	0.724137	0.908398	53
6778521	Aebp1	0	-0.0039312	0.241158	0.525387	0.693991	53
6782443	Tlcd2	0	-0.0210315	0.167675	0.39221	0.476712	53
6817287	Nid2	0	-0.00314907	0.171961	0.42463	0.581357	53
6825439	Scara3	0	0.10794	0.170389	0.610099	0.880196	53
6833393	Igfbp6	0	-0.0936023	0.168505	0.667851	0.909046	53
6861354	Pdgfrb	0	-0.0961895	0.105779	0.390078	0.466376	53
6865971	Slc26a2	0	-0.112109	0.151096	0.399131	0.506772	53
6899861	Notch2	0	-0.0146979	0.109842	0.33567	0.415763	53
6917933	Hspg2	0	-0.0295606	0.143821	0.290718	0.429376	53
6946038	Tmem176a	0	-0.086385	0.0924568	0.264775	0.344052	53
6988706	Mpzl2	0	0.124	0.213538	0.616758	0.835682	53
6777968	Gpr182	0	-0.0796411	0.170097	0.392821	0.870921	53
6808221	Slc12a7	0	0.0234139	0.169492	0.30984	0.478203	53
6856689	Twsg1	0	-0.090722	0.0848236	0.305756	0.378027	53
6933073	Pkd2	0	0.0104028	0.144395	0.279357	0.340159	53
6940648	Gbp4	0	0.082513	0.228359	0.385896	0.668176	53
6953429	Tmem176b	0	-0.0401138	0.0780572	0.199252	0.251248	53
6993834	Kank2	0	-0.0088258	0.134647	0.258395	0.349606	53
6996942	Tmod3	0	0.0192737	0.106629	0.215991	0.274732	53
6833185	Gpd1	0	0.243406	0.171939	-0.144974	-0.190319	55
6855833	Apobec2	0	0.521231	0.215294	-0.0444944	-0.0498662	55
6865039	Gpr151	0	0.471676	0.0956474	-0.18186	-0.117392	55
6791347	Krtap1-5	0	0.795805	-0.190364	-0.602323	-0.109051	56
6797742	Bdkrb2	0	0.377064	0.0673011	-0.146385	0.042846	56
6898161	Mlf1	0	0.465189	0.199882	-0.0201062	0.16457	56
6838392	Rnd1	0	0.108948	0.0181261	-0.376323	-0.164839	56
6861639	Grp	0	0.120718	-0.0337044	-0.442941	-0.143009	56
6943974	Tac1	0	0.195133	0.10008	-0.350403	-0.0893173	56
6993465	Endod1	0	0.0735214	0.026979	-0.247893	-0.0975081	56
6757927	Ankrd23	0	0.476504	0.204408	0.0279805	-0.0986379	57
6819250	Fitm1	0	0.506717	0.193531	0.14856	-0.0727083	57
6753397	Tnni1	0	0.500296	0.127963	0.0196912	-0.0449809	58
6756637	Rgs20	0	0.359291	0.147639	-0.00139769	0.00736103	58
6782141	Eno3	0	0.666353	0.308307	0.166423	0.0377966	58
6784003	Tcap	0	0.76881	0.332468	0.127839	0.132952	58
6800233	Ifrd1	0	0.363534	0.175978	0.128217	0.0686268	58
6811520	Olfr11	0	0.648616	0.365207	0.2387	0.25317	58
6823114	Myoz1	0	0.772228	0.165795	0.0871416	0.052645	58
6840261	Il1rap	0	0.243603	0.0173431	-0.0419525	-0.0551087	58
6848813	Gm3435	0	0.335637	0.0988669	0.0530682	0.0491088	58
6868243	Olfr1502	0	0.61463	-0.0643105	0.059153	-0.224313	58
6895855	Car3	0	0.604979	0.263512	0.0707993	0.233524	58
6898138	Ptx3	0	0.809283	0.19045	0.19045	0.139612	58
6899315	Tpm3	0	0.286636	0.162479	0.118797	0.0903752	58
6934116	Myl2	0	1.08097	0.599836	0.456596	0.20326	58
6949007	Lmcd1	0	0.429499	0.179202	0.0722405	0.126235	58
6953130	Olfr458	0	0.750194	0.0180218	0.0843383	-0.147899	58
6957518	Tas2r109	0	0.647353	0.128945	0.315269	0.264555	58
6966327	Hamp	0	0.93447	0.151722	0.286697	0.132597	58
6967061	Saa1	0	1.19233	0.287592	0.287592	0.200813	58
6972159	Cox8b	0	0.493096	0.1238	-0.0350657	-0.0784773	58
6983782	Scoc	0	0.549412	-0.117237	-0.0743074	-0.050971	58
6928716	Steap4	0	1.3524	0.505345	0.734935	1.45308	59
6753247	Chi3l1	0	0.158172	0.00859133	-0.0342735	0.332164	59
6883261	Trp53rk	0	0.428131	-0.0143762	0.685968	0.174531	60
6867618	Aldh3b2	0	0.345753	-0.097069	0.489278	0.310402	61
6965597	Gltscr2	0	0.237669	0.0289447	0.374691	0.175346	61
6852229	Ltbp1	0	0.107375	0.0126417	0.138567	0.361679	62
6991362	Plscr2	0	0.198638	0.0528999	0.198638	0.632404	62
6759466	Myl1	0	1.35356	1.0195	0.461351	-0.206513	63
6982999	1810029B16Rik	0	0.361433	0.206504	-0.0778157	-0.196369	63
6764134	Casq1	0	0.820211	0.42242	0.114139	0.0780962	64
6767057	Trdn	0	1.21675	0.693687	0.0939991	-0.122566	64
6769255	Gadd45b	0	0.628681	0.499888	0.260684	0.206294	64
6781840	Myh2	0	0.846893	0.795042	0.262772	0.195046	64
6781846	Myh4	0	1.65906	1.19885	0.582357	-0.0176407	64
6782918	Ccl12	0	0.956619	0.983165	0.550762	0.394816	64
6806566	Edn1	0	0.407112	0.268409	0.0499161	0.14715	64
6811061	Actn2	0	0.560582	0.362235	-0.00546283	0.0283497	64
6815022	Ckmt2	0	1.04808	0.671961	0.014807	-0.119337	64
6824838	Tgm1	0	1.08718	0.863523	0.46661	0.452661	64
6836887	Mb	0	0.687147	0.580526	0.0142114	-0.0464398	64
6843642	Srl	0	0.503991	0.311598	0.120268	0.153618	64
6854260	Tnfrsf12a	0	0.538823	0.458672	0.2881	0.189916	64
6855067	Hspa1a	0	0.495464	0.366591	0.190635	0.190635	64
6860520	Myot	0	1.08301	0.748487	0.215475	0.00608566	64
6864680	Hbegf	0	0.418725	0.31427	0.0602154	0.0623569	64
6867653	Clcf1	0	0.576993	0.508388	0.101444	0.222113	64
6867755	Fosl1	0	0.47556	0.378251	0.118883	0.182567	64
6871057	Actn3	0	0.693679	0.477892	0.169884	0.100591	64
6892955	Tnnc2	0	1.03652	0.957954	0.481867	0.363066	64
6918167	Hspb7	0	0.812377	0.602997	0.356698	0.245127	64
6951412	Pdk4	0	0.658938	0.394748	0.185507	0.198799	64
6959011	Ckm	0	0.72702	0.621167	0.198025	0.128976	64
6964285	Mylpf	0	0.963436	0.810748	0.416793	0.0332677	64
6965264	Tnni2	0	0.792812	0.586372	0.179729	0.167473	64
6965269	Tnnt3	0	0.838987	0.685363	0.246948	0.159635	64
6966873	Mybpc2	0	0.579637	0.384735	0.110064	0.0719055	64
6971266	Atp2a1	0	1.06777	0.716926	0.125369	0.188366	64
6971424	Cox6a2	0	0.426841	0.264765	0.126279	0.0987272	64
6986031	Acta1	0	0.921254	0.829294	0.380046	0.211296	64
6992379	Ucn2	0	0.957911	0.874676	0.410063	0.310805	64
6994742	Olfr915	0	0.624415	0.743773	0.0720781	0.108525	64
6892905	Sdc4	0	0.267403	0.233926	0.118866	0.175934	65
6899651	Lysmd1	0	0.472579	0.310544	-0.185435	0.364488	65
6939990	Cxcl10	0	1.03308	0.985821	0.481791	0.751408	65
6750519	Cxcr2	0	0.985115	0.765243	0.709334	0.409346	66
6771723	Olfr763	0	0.672861	0.562659	0.773128	-0.0142453	66
6771729	Olfr776	0	1.2667	0.874936	0.957778	0.0271883	66
6772815	Arg1	0	1.06609	1.32514	1.11691	-0.00821311	66
6775854	Mybpc1	0	0.67991	0.691411	0.427825	0.169979	66
6782915	Ccl2	0	0.855183	0.943375	0.647339	0.252489	66
6782916	Ccl7	0	0.757889	0.763941	0.530064	0.266753	66
6785508	Slc16a3	0	0.526474	0.626606	0.662848	0.131258	66
6813742	Ctla2b	0	0.896766	0.960309	0.778856	0.445536	66
6836728	Ly6a	0	0.49218	0.455322	0.384243	0.221519	66
6844409	Olfr171	0	0.563365	0.50721	0.613143	-0.530306	66
6849595	Cdkn1a	0	0.599563	0.533363	0.390562	0.200457	66
6860635	Eif1a	0	0.307377	0.243094	0.309847	0.128377	66
6861707	Tubb6	0	0.6206	0.623826	0.596552	0.310776	66
6870925	Gal	0	0.599297	0.674717	0.651591	0.0451669	66
6888593	Olfr1216	0	1.44534	1.16117	1.29121	0.0707446	66
6908924	Myoz2	0	0.679245	0.593577	0.389619	-0.0204649	66
6932379	Cxcl2	0	0.630381	0.702042	0.412354	0.119538	66
6942524	Serpine1	0	0.985462	0.981943	0.687949	0.332362	66
6958765	Vmn1r82	0	0.921086	0.994078	0.901751	0.292425	66
6960177	Klk9	0	0.794021	0.398405	0.507027	0.0884338	66
6960178	Klk8	0	0.552121	0.579405	0.537413	0.057572	66
6967971	Aldh1a3	0	0.584364	0.499906	0.315422	0.147953	66
6970445	Lyve1	0	0.907653	0.577718	0.58418	0.284156	66
6977260	Hmox1	0	1.11097	1.1365	1.04417	0.474961	66
6989974	2810417H13Rik	0	0.534017	0.529603	0.695086	0.0859417	66
6997634	Snhg5	0	0.568299	0.532656	0.42838	0.252203	66
6789613	Olfr385	0	0.66869	0.704691	0.877319	0.0988377	66
6805357	Hist1h3d	0	0.393369	0.604276	0.704072	-0.0295882	66
6853533	Tcp10a	0	0.660274	0.898507	0.888307	-0.662189	66
6887374	Scn9a	0	0.543435	0.707564	0.664835	0.143456	66
6899750	Hist2h3c1	0	0.215861	0.271163	0.352784	-0.0218193	66
6922165	Mup5	0	0.443703	0.699957	0.689807	0.0944438	66
6954350	Vmn1r35	0	0.618677	0.734177	1.04708	-0.0517996	66
6973490	Vmn1r180	0	0.530221	0.709712	1.31982	-0.0304301	66
7007950	Olfr46	0	0.458401	0.880945	0.871549	-0.107642	66
7015971	Ndufb11	0	0.222497	0.297607	0.347504	0.00455784	66
6780863	Nhp2	0	0.310591	0.349619	0.267419	0.0494414	66
6748884	Il1r1	0	0.66834	0.66834	0.811481	0.70104	67
6753917	Ptgs2	0	0.97518	0.825077	1.15259	1.18686	67
6755242	Ccdc19	0	0.486005	0.549056	0.661811	0.469307	67
6764038	Fcgr2b	0	0.7918	0.962757	1.13532	0.856364	67
6764246	Ifi204	0	1.22029	1.29916	1.3727	1.18092	67
6764289	Ifi202b	0	1.20044	1.13647	0.954964	0.731712	67
6765218	Atf3	0	1.32952	1.30639	1.31418	1.09974	67
6766455	Sgk1	0	0.340688	0.376319	0.44644	0.295603	67
6767782	Lilrb4	0	1.68092	1.86397	1.86124	1.72594	67
6771703	Mmp19	0	0.641067	0.641067	0.794917	0.641067	67
6774400	Srgn	0	0.312542	0.338735	0.350681	0.266804	67
6774404	Ddx21	0	0.346991	0.28093	0.254818	0.163223	67
6776185	Socs2	0	0.363544	0.185729	0.285319	0.296945	67
6782917	Ccl11	0	0.716647	0.529514	0.590293	0.541911	67
6782988	Slfn2	0	1.1006	1.29002	1.40946	0.947295	67
6783035	Ccl4	0	0.742504	0.386026	0.413219	0.413219	67
6783040	Gm11428	0	1.37844	1.81709	1.96161	1.48032	67
6785865	Igfbp3	0	0.485415	0.553746	0.483466	0.338079	67
6787896	Irgm1	0	0.628428	0.520339	0.503299	0.33322	67
6790290	Ccl6	0	1.05402	1.11561	1.10978	0.851745	67
6790291	Ccl9	0	0.843274	0.963288	0.924933	0.58206	67
6790294	Ccl3	0	1.10522	0.998255	1.01981	0.893965	67
6792614	Socs3	0	0.495852	0.424867	0.367881	0.268676	67
6796121	Rhoj	0	0.600891	0.540429	0.611815	0.47046	67
6796691	Fos	0	0.522164	0.443298	0.422666	0.289984	67
6797579	Serpina3n	0	0.31773	0.316968	0.246851	0.258251	67
6804582	Klf6	0	0.384879	0.343891	0.341993	0.268099	67
6806435	Gcnt2	0	0.54194	0.483125	0.478191	0.405926	67
6807007	S1pr3	0	0.824981	0.544051	0.61168	0.710133	67
6807041	Gadd45g	0	0.537352	0.323361	0.284402	0.221591	67
6807336	Tgfbi	0	0.533204	0.63669	0.663724	0.649538	67
6818696	Lgals3	0	1.01158	1.19957	1.30644	1.11235	67
6819258	Irf9	0	0.383464	0.322294	0.355692	0.324984	67
6825688	Slc39a14	0	0.291768	0.259883	0.197589	0.197589	67
6828472	Dab2	0	0.536635	0.569798	0.637563	0.567792	67
6830770	Trib1	0	0.489887	0.399382	0.311962	0.223414	67
6830927	Myc	0	0.690932	0.639881	0.567171	0.366771	67
6832923	Ano6	0	0.288083	0.297835	0.398501	0.332274	67
6833736	Osmr	0	0.789649	0.679302	0.773984	0.745776	67
6835945	Klhl38	0	0.562599	0.306377	0.533232	0.435961	67
6836646	Sf3b4	0	0.457166	0.274339	0.345661	0.274397	67
6840129	Rtp4	0	0.348925	0.356707	0.265733	0.191507	67
6847556	Adamts1	0	0.501044	0.51745	0.481313	0.466863	67
6847559	Adamts5	0	0.407644	0.331914	0.331914	0.325155	67
6848568	Ezr	0	0.3829	0.381621	0.338202	0.328158	67
6850097	Clic1	0	0.540041	0.643976	0.714445	0.522521	67
6850191	Ier3	0	0.374815	0.375538	0.240494	0.243909	67
6854604	Fkbp5	0	0.32863	0.296776	0.346972	0.265424	67
6856201	Plin4	0	0.414989	0.243953	0.243953	0.243953	67
6857435	Eif2ak2	0	0.327348	0.375048	0.392814	0.327348	67
6859304	Rnf125	0	0.792263	0.782234	0.511633	0.406034	67
6864700	Cd14	0	1.0488	1.09633	1.13467	0.881206	67
6865902	2010002N04Rik	0	0.323832	0.271892	0.241003	0.165358	67
6869068	Il33	0	0.368124	0.290711	0.206215	0.196207	67
6869334	Ifit1	0	1.20715	1.17231	0.760393	0.903513	67
6871566	Ms4a6d	0	1.46333	1.81361	1.98059	1.44563	67
6872462	Glis3	0	0.3681	0.3681	0.469087	0.413673	67
6872781	Ch25h	0	1.52877	1.74673	1.52073	1.3725	67
6875132	Vim	0	0.407913	0.52588	0.542213	0.493365	67
6876543	Nek6	0	0.304533	0.335681	0.406472	0.276326	67
6880393	Thbs1	0	0.780398	0.959382	1.06961	0.920991	67
6885873	Lcn2	0	1.06516	0.98615	0.586108	1.00003	67
6889258	Cd44	0	0.781575	0.73608	0.71092	0.565048	67
6890838	Il1b	0	0.610841	0.439542	0.406401	0.406401	67
6892579	Tgm2	0	0.565126	0.587442	0.688054	0.565126	67
6898076	Tiparp	0	0.34956	0.269317	0.269317	0.239649	67
6899378	S100a8	0	0.520072	0.676673	0.599846	0.698741	67
6899520	S100a10	0	0.344302	0.348748	0.362262	0.228394	67
6901950	Gbp7	0	0.361614	0.215225	0.240509	0.329673	67
6901953	Gbp3	0	0.49783	0.368629	0.325127	0.408675	67
6901957	Gbp2	0	0.785963	0.735897	0.83158	0.954359	67
6905289	Tm4sf1	0	0.673351	0.578186	0.504928	0.509726	67
6905296	Wwtr1	0	0.275574	0.199559	0.256904	0.267136	67
6906912	S100a9	0	0.863061	1.04262	0.863616	1.09968	67
[truncated: 527 more rows]

## Sheet: the description shee 2
The name of table	Header	The description of header
Modelfile	modelnumber	The trend ID
	od	The number does not repersent the actual the value of expression level, but the rangeability of five groups which is Classification Mark
	1d
	3d
	1w
	3w
	genes_assigned	The actual gene number in this trend
	genes_expected	The theoretical gene number in this trend by replacement method
	p_value	The significant level
	adj_p-value	Adjusting sigificant level

## Sheet: Sheet2
modelnumber	od	1d	3d	1w	3w	genes_assigned	genes_expected	p-value	adj_p-value
1	0	-1	-2	-3	-4	0	2.56667	1	1
2	0	-1	-2	-3	-3	2	3.525	0.866914	1
3	0	-1	-2	-3	-2	126	7.41667	7.14854e-107	5.71883e-105
4	0	-1	-2	-2	-3	0	5.75833	1	1
5	0	-1	-2	-2	-2	7	6.35	0.4498	1
6	0	-1	-2	-2	-1	255	22.4	1.87879e-175	1.50303e-173
7	0	-1	-2	-1	-2	0	23.15	1	1
8	0	-1	-2	-1	-1	19	50.175	1	1
9	0	-1	-2	-1	0	23	23.4167	0.562454	1
10	0	-1	-1	-2	-3	0	11.5333	1	1
11	0	-1	-1	-2	-2	1	15.1167	1	1
12	0	-1	-1	-2	-1	477	49.05	8.20401e-305	6.56321e-303
13	0	-1	-1	-1	-2	0	38.8333	1	1
14	0	-1	-1	-1	-1	20	40.4667	0.999876	1
15	0	-1	-1	-1	0	38	38.8167	0.574487	1
16	0	-1	-1	0	-1	1	48.7333	1	1
17	0	-1	-1	0	0	13	37.6167	0.999999	1
18	0	-1	-1	0	1	28	22.4	0.140343	1
19	0	-1	0	-1	-2	1	21.1333	1	1
20	0	-1	0	-1	-1	1	43.1417	1	1
21	0	-1	0	-1	0	3	60.2333	1	1
22	0	-1	0	0	-1	0	51.8167	1	1
23	0	-1	0	0	0	7	89.7667	1	1
24	0	-1	0	0	1	5	49.05	1	1
25	0	-1	0	1	0	10	57.1583	1	1
26	0	-1	0	1	1	38	18.4083	3.92733e-05	0.00314186
27	0	-1	0	1	2	35	7.41667	1.80904e-13	1.44723e-11
28	0	0	-1	-2	-3	0	2.375	1	1
29	0	0	-1	-2	-2	1	5.56667	0.9962	1
30	0	0	-1	-2	-1	182	18.4083	1.27868e-114	1.02294e-112
31	0	0	-1	-1	-2	0	13.875	1	1
32	0	0	-1	-1	-1	0	22.2	1	1
33	0	0	-1	-1	0	7	37.6167	1	1
34	0	0	-1	0	-1	1	45.525	1	1
35	0	0	-1	0	0	1	89.7667	1	1
36	0	0	-1	0	1	4	50.175	1	1
37	0	0	0	-1	-2	0	6.85	1	1
38	0	0	0	-1	-1	1	19.5167	1	1
39	0	0	0	-1	0	19	89.7667	1	1
40	0	0	0	0	-1	1	58.25	1	1
41	0	0	0	0	1	27	40.4667	0.990193	1
42	0	0	0	1	0	26	62.7667	1	1
43	0	0	0	1	1	61	22.2	6.94258e-12	5.55407e-10
44	0	0	0	1	2	37	6.35	6.39665e-17	5.11732e-15
45	0	0	1	0	-1	0	50.025	1	1
46	0	0	1	0	0	4	62.7667	1	1
47	0	0	1	0	1	0	43.1417	1	1
48	0	0	1	1	0	39	38.8167	0.509989	1
49	0	0	1	1	1	11	19.5167	0.986282	1
50	0	0	1	1	2	7	15.1167	0.993036	1
51	0	0	1	2	1	154	18.3833	4.90637e-87	3.9251e-85
52	0	0	1	2	2	97	5.56667	1.68201e-83	1.34561e-81
53	0	0	1	2	3	20	3.525	1.21044e-09	9.68348e-08
54	0	1	0	-1	-2	0	12.7833	1	1
55	0	1	0	-1	-1	3	18.3833	0.999998	1
56	0	1	0	-1	0	7	57.1583	1	1
57	0	1	0	0	-1	2	46.3167	1	1
58	0	1	0	0	0	21	62.7667	1	1
59	0	1	0	0	1	2	48.7333	1	1
60	0	1	0	1	0	1	53.5333	1	1
61	0	1	0	1	1	2	45.525	1	1
62	0	1	0	1	2	2	23.15	1	1
63	0	1	1	0	-1	2	20.1917	1	1
64	0	1	1	0	0	32	38.8167	0.884184	1
65	0	1	1	0	1	3	51.8167	1	1
66	0	1	1	1	0	38	37.6167	0.497013	1
67	0	1	1	1	1	124	58.25	2.034e-14	1.6272e-12
68	0	1	1	1	2	8	38.8333	1	1
69	0	1	1	2	1	70	46.3167	0.000629149	0.0503319
70	0	1	1	2	2	35	13.875	1.28048e-06	0.000102438
71	0	1	1	2	3	7	5.75833	0.3549	1
72	0	1	2	1	0	6	24.7333	0.999998	1
73	0	1	2	1	1	12	50.025	1	1
74	0	1	2	1	2	2	21.1333	1	1
75	0	1	2	2	1	59	20.1917	1.38358e-12	1.10686e-10
76	0	1	2	2	2	22	6.85	3.09775e-06	0.00024782
77	0	1	2	2	3	10	11.5333	0.715032	1
78	0	1	2	3	2	188	12.7833	2.48419e-148	1.98735e-146
79	0	1	2	3	3	47	2.375	1.16251e-43	9.30008e-42
80	0	1	2	3	4	11	2.56667	7.65408e-05	0.00612327
