# Supplementary material for: Aberrant LncRNA Expression Profile in a Contusion Spinal Cord Injury Mouse Model
Source: Biomed Res Int. 2016 Sep 4;2016:9249401. doi: 10.1155/2016/9249401 (PMC5027055; doi:10.1155/2016/9249401)
Supplement: Supplementary file 1 — S1 license pdf: The License Awarded by Soochow University. Table S1: Differential Expression of LncRNAs and Annotation. Table S2: Differential Expression of mRNAs and Annotation. Table S3: mRNAs STC Increase or Decrease. Table S4: LncRNAs STC Increase or Decrease. Table S5: The Significant GO Terms for Differentially Expressed. Table S6: The Significant Pathways of Differentially Expressed Genes. Table S7: The Quantity of the mRNA and LncRNA Network. S1 Fig: The dynamic network between LncRNAs and mRNAs. In this map, the circles with a green line represented LncRNAs, and the other circles represented mRNA. The lines between circles indicated regulation between these genes. The size of the circles indicated the ability of interaction between the genes. This ability was quantified by the degree, which was defined as the connective number between genes. The color was in accordance with the results of the clustering analysis, which was defined as the K-core. The same K-core indicated the similarity and correlation of function between genes. The red color representing the maximal K-core indicated the strongest regulation level in this network. [file 9249401.f1.zip › S4 Table.xls]

## Sheet: the description of sheet 1
The name of table	Header	the description of header
lncRNAmodelfile	probeset_id	Probe ID
	lncRNA	The name of LncRNA
	od	The standardization of the contrl group logical expression value
	1d	The standardization of the 1 day post-injured group logical expression value
	3d	The standardization of the 3 day post-injured logical expression value
	1w	The standardization of the 1 week post-injured logical expression value
	3w	The standardization of the 3 weeks logical expression value
	modelnumber	Trend profile ID

## Sheet: sheet 1
probeset_id	lncRNA	od	1d	3d	1w	3w	modelnumber
ENSMUST00000128900:4422422	ENSMUST00000128900	0	-0.109875	-0.165862	-0.368172	-0.281908	2
ENSMUST00000134248:5345872	ENSMUST00000134248	0	-0.190974	-0.447466	-0.723648	-0.380447	3	akt
ENSMUST00000137153:5171671	ENSMUST00000137153	0	-0.389516	-0.893237	-1.37665	-0.688978	3
ENSMUST00000147410:5216089	ENSMUST00000147410	0	-0.304259	-0.693342	-0.874048	-0.504633	3
n274208:5078247	NONMMUT001318	0	-0.40706	-0.816964	-1.26152	-0.595248	3
n273908:4343856	NONMMUT009579	0	-0.126463	-0.271922	-0.581835	-0.360789	3
n277525:4743062	NONMMUT009850	0	-0.145566	-0.312285	-0.47089	-0.217357	3	akt not sig
n272567:5261686	NONMMUT014671	0	-0.148395	-0.342958	-0.566453	-0.259604	3
n285108:4966401	NONMMUT019465	0	-0.228024	-0.41238	-0.703261	-0.473099	3
n283216:4657076	NONMMUT020409	0	-0.439855	-0.673696	-1.1719	-0.656879	3
n294562:5502851	NONMMUT021734	0	-0.22791	-0.562922	-0.706622	-0.377516	3
n273424:5099335	NONMMUT021928	0	-0.128665	-0.43494	-0.53505	-0.352555	3
n279078:5106418	NONMMUT023864	0	-0.187273	-0.310781	-0.490373	-0.309227	3
n286960:4483380	NONMMUT024290	0	-0.255857	-0.597275	-1.0465	-0.434213	3
n280508:4323727	NONMMUT027272	0	-0.632763	-1.08	-1.31348	-0.886857	3	akt
n280508:4868527	NONMMUT027272	0	-0.591871	-0.706341	-1.0111	-0.760276	3	akt
n274856:5255614	NONMMUT031132	0	-0.486514	-0.570964	-0.811355	-0.598945	3
n263882:5143179	NONMMUT037649	0	-0.287101	-0.454903	-0.630131	-0.327585	3
n277074:5101627	NONMMUT041886	0	-0.14584	-0.23048	-0.578154	-0.368265	3
n281631:4805617	NONMMUT048860	0	-0.542271	-0.641566	-0.920401	-0.660999	3
n269256:5309914	NONMMUT051309	0	-0.228937	-0.76424	-1.04057	-0.678199	3
n277099:4398731	NONMMUT061411	0	-0.459149	-0.71886	-1.51185	-1.09133	3
n415242:5245141	NONMMUT061416	0	-0.200296	-0.260119	-0.570486	-0.399746	3
n277439:5473625	NONMMUT061434	0	-0.157191	-0.604036	-0.83299	-0.406939	3
n277704:4799360	NONMMUT061609	0	-0.399867	-0.795791	-1.31605	-0.81526	3
n277310:5413161	NONMMUT061714	0	-0.371858	-0.620255	-1.02137	-0.7054	3	akt
n277310:5543195	NONMMUT061714	0	-0.569066	-0.870734	-1.45205	-0.807998	3	akt
n282659:4903478	NONMMUT061936	0	-0.106174	-0.368795	-0.597201	-0.36367	3
n266210:5398493	NONMMUT063936	0	-0.535995	-0.673348	-1.1341	-0.763761	3
n288339:4474905	NONMMUT064537	0	-0.212373	-0.469363	-0.858861	-0.396885	3
n279641:5386136	NONMMUT067081	0	-0.575425	-0.780545	-1.1176	-0.73874	3
n289234:4746365	NONMMUT072615	0	-0.296595	-0.617592	-0.769586	-0.441027	3
n282477:4318261	NONMMUT074554	0	-0.192213	-0.391254	-0.567548	-0.252922	3
ENSMUST00000154953:5360880	ENSMUST00000154953	0	-0.432399	-0.833261	-0.795922	-0.643431	5
n269085:4712826	NONMMUT020424	0	-0.762833	-1.05117	-1.24553	-0.951336	5
n269620:4663520	NONMMUT022855	0	-0.391533	-0.639107	-0.704879	-0.512501	5
n291178:4777854	NONMMUT035967	0	-0.286967	-0.722099	-0.495705	-0.544921	5
n343790:4534756	NONMMUT041114	0	-0.602429	-0.916448	-0.980733	-0.87419	5
n265500:5386707	NONMMUT044959	0	-0.423577	-1.03695	-0.934865	-0.956699	5
n275619:5429639	NONMMUT046735	0	-0.336319	-1.00346	-0.750979	-0.880899	5
ENSMUST00000085979:5341133	ENSMUST00000085979	0	-0.541589	-0.601006	-0.77525	-0.346534	6
ENSMUST00000112256:5484392	ENSMUST00000112256	0	-0.30935	-0.755255	-0.626145	-0.363059	6
ENSMUST00000124186:5190544	ENSMUST00000124186	0	-0.615194	-0.81189	-0.887141	-0.619316	6
ENSMUST00000124689:4438110	ENSMUST00000124689	0	-0.601099	-0.722928	-0.64845	-0.405311	6
ENSMUST00000128109:4761655	ENSMUST00000128109	0	-0.618256	-0.906329	-0.871461	-0.438553	6
ENSMUST00000132806:5160655	ENSMUST00000132806	0	-0.274831	-0.764664	-0.595783	-0.34515	6
ENSMUST00000135488:4840930	ENSMUST00000135488	0	-0.468491	-0.634456	-0.799724	-0.164236	6
ENSMUST00000136119:4553833	ENSMUST00000136119	0	-0.32925	-0.918055	-0.739073	-0.251021	6	akt
ENSMUST00000136489:4748324	ENSMUST00000136489	0	-0.400331	-0.727301	-0.955149	-0.384408	6
ENSMUST00000138368:4551250	ENSMUST00000138368	0	-0.551985	-1.41117	-1.15464	-0.383896	6
ENSMUST00000143645:4568554	ENSMUST00000143645	0	-0.505082	-1.00746	-0.930567	-0.331047	6
ENSMUST00000145560:5559658	ENSMUST00000145560	0	-0.329321	-0.78311	-0.966835	-0.294825	6
ENSMUST00000145742:5601010	ENSMUST00000145742	0	-0.437603	-0.6949	-0.643289	-0.345131	6
ENSMUST00000145885:4921971	ENSMUST00000145885	0	-0.534602	-1.22623	-1.0615	-0.159347	6
ENSMUST00000146180:5193963	ENSMUST00000146180	0	-0.403291	-0.752596	-0.788967	-0.267942	6
ENSMUST00000146204:4797385	ENSMUST00000146204	0	-0.300071	-0.844668	-0.972688	-0.359472	6
ENSMUST00000149165:4590194	ENSMUST00000149165	0	-0.510653	-0.752555	-1.05176	-0.354044	6
ENSMUST00000151536:5044784	ENSMUST00000151536	0	-0.228966	-0.822434	-0.793419	-0.379417	6
ENSMUST00000154771:4322177	ENSMUST00000154771	0	-0.449402	-0.562845	-0.826205	-0.179904	6
ENSMUST00000155925:5068357	ENSMUST00000155925	0	-0.187038	-0.384171	-0.596256	-0.134729	6
ENSMUST00000161765:5226830	ENSMUST00000161765	0	-0.73542	-1.03952	-0.940622	-0.719913	6
ENSMUST00000172703:5163812	ENSMUST00000172703	0	-0.477205	-0.773367	-0.951076	-0.474998	6
ENSMUST00000173496:5049788	ENSMUST00000173496	0	-0.335593	-1.11204	-0.834335	-0.434904	6
ENSMUST00000176122:4620037	ENSMUST00000176122	0	-0.403749	-1.21221	-1.28071	-0.709773	6
ENSMUST00000179255:5341546	ENSMUST00000179255	0	-0.496712	-1.36866	-1.13172	-0.354646	6
n268066:5083846	n268066	0	-0.242604	-0.520194	-0.587552	-0.369768	6
n274811:5308936	n274811	0	-0.410592	-0.674955	-0.91268	-0.331836	6
n279396:4905240	n279396	0	-0.538378	-0.729712	-0.998252	-0.443127	6	akt
n282283:4380345	n282283	0	-0.19338	-1.0004	-1.05684	-0.513286	6
n279976:5245136	NONMMUT000399	0	-0.619093	-1.22671	-1.47647	-0.547601	6
n272822:4760690	NONMMUT001250	0	-0.540379	-0.911362	-1.00945	-0.371163	6
n275929:4490359	NONMMUT001312	0	-0.583386	-0.844284	-0.909968	-0.527561	6
n288825:4736388	NONMMUT002044	0	-0.337951	-0.55939	-0.581099	-0.180937	6
n275510:4921956	NONMMUT004432	0	-0.229059	-0.485505	-0.650439	-0.188071	6
n275947:5277545	NONMMUT004524	0	-0.404059	-0.525278	-0.687992	-0.33377	6
n280184:5158542	NONMMUT005549	0	-0.333892	-0.63533	-0.762134	-0.390895	6
n280107:4527312	NONMMUT006343	0	-0.578896	-0.961818	-0.947955	-0.365167	6
n270548:5003138	NONMMUT006523	0	-0.421942	-0.751845	-1.07196	-0.141515	6
n414006:4630862	NONMMUT008921	0	-0.249404	-0.763111	-0.687637	-0.361809	6
n268645:5608369	NONMMUT009036	0	-0.28412	-0.722866	-0.780285	-0.357995	6
n286091:4553890	NONMMUT009522	0	-0.600933	-0.952724	-1.07871	-0.497613	6
n273908:4810488	NONMMUT009579	0	-0.444457	-1.01863	-1.08947	-0.288235	6
n285975:5163059	NONMMUT010137	0	-0.31957	-0.884394	-0.621911	-0.19587	6
n277795:4476298	NONMMUT012808	0	-0.333677	-1.14359	-1.00372	-0.551707	6
n423126:5401809	NONMMUT013212	0	-0.595711	-0.67661	-0.746697	-0.367738	6
n277713:5550066	NONMMUT014604	0	-0.110003	-0.320616	-0.406827	-0.138152	6
n286616:4799225	NONMMUT014670	0	-0.544021	-0.984614	-0.865802	-0.395004	6
n276151:4567374	NONMMUT014958	0	-0.227575	-0.47763	-0.752366	-0.169558	6
n276728:5398013	NONMMUT015180	0	-0.182147	-0.791244	-0.872144	-0.363627	6
n417762:4655052	NONMMUT016061	0	-0.36158	-0.554014	-0.744361	-0.130613	6
n284482:4688863	NONMMUT017329	0	-0.692123	-0.937486	-0.945418	-0.589131	6
n287576:4431947	NONMMUT018743	0	-0.450809	-1.00877	-0.690038	-0.296512	6
n278342:4900220	NONMMUT019440	0	-0.171206	-0.554077	-0.432401	-0.212921	6
n277219:5237126	NONMMUT019841	0	-0.27274	-0.776392	-0.566046	-0.260743	6
n283789:4344708	NONMMUT020189	0	-0.742733	-0.959531	-1.2967	-0.300705	6	akt
n286436:5013905	NONMMUT020402	0	-0.775774	-0.864336	-1.11026	-0.49261	6
n283122:4478892	NONMMUT020412	0	-0.25653	-0.917444	-0.852046	-0.437017	6
n267830:5000364	NONMMUT020707	0	-0.749676	-0.958645	-1.15489	-0.676523	6
n294791:4501728	NONMMUT021120	0	-0.511095	-0.580304	-0.683381	-0.26465	6
n277408:4490466	NONMMUT021257	0	-0.140274	-0.869129	-0.85654	-0.394323	6
n289383:5555646	NONMMUT021733	0	-0.123187	-0.585835	-0.637599	-0.283689	6
n286445:4760316	NONMMUT022439	0	-0.832829	-1.28208	-1.19701	-0.823773	6
n271535:5528615	NONMMUT022718	0	-0.49771	-0.802073	-0.799484	-0.155498	6
n294462:4533377	NONMMUT023381	0	-0.56129	-0.820712	-1.28154	-0.18369	6
n295362:4312899	NONMMUT023388	0	-0.403038	-0.478903	-0.61107	-0.34023	6	akt not sig
n274343:5351838	NONMMUT023781	0	-0.490673	-0.661503	-0.840024	-0.218293	6
n413859:5465811	NONMMUT023869	0	-0.318844	-0.58433	-0.493915	-0.318844	6	akt not sig
n287700:5310510	NONMMUT024407	0	-0.47534	-0.781953	-1.09945	-0.31972	6
n276225:5125709	NONMMUT024677	0	-0.573571	-0.766669	-0.930731	-0.415043	6
n265475:4586447	NONMMUT025385	0	-0.44293	-0.695625	-0.966972	-0.336867	6
n277418:5215193	NONMMUT026612	0	-0.669748	-0.915174	-1.30797	-0.388278	6
n272047:4503631	NONMMUT026627	0	-0.592812	-0.994121	-1.00608	-0.712773	6
n269444:5222858	NONMMUT026642	0	-0.563352	-0.810285	-0.979672	-0.488117	6
n272134:4449087	NONMMUT026643	0	-0.499852	-0.663222	-0.927264	-0.187269	6
n289294:5176015	NONMMUT026644	0	-0.310363	-0.698871	-0.823635	-0.155749	6
n268464:4699268	NONMMUT027166	0	-0.317254	-0.7335	-0.779829	-0.372692	6
n268263:4342471	NONMMUT027269	0	-0.475896	-0.823054	-0.884767	-0.534434	6
n276049:4870251	NONMMUT030206	0	-0.246824	-0.293876	-0.389936	-0.149249	6
n274409:4317384	NONMMUT032196	0	-0.491362	-0.791436	-0.978415	-0.482237	6
n271849:4388970	NONMMUT032514	0	-0.298753	-1.14886	-0.736303	-0.352949	6
n282149:4809619	NONMMUT037278	0	-0.317607	-0.591731	-0.884363	-0.320883	6
n270579:4785239	NONMMUT038984	0	-0.579961	-0.823709	-0.719628	-0.409512	6
n277442:5395869	NONMMUT040153	0	-0.6937	-0.805529	-0.782856	-0.470497	6
n411932:5540335	NONMMUT040894	0	-0.728254	-1.02578	-1.03831	-0.282208	6
n411932:4757110	NONMMUT040894	0	-0.391905	-0.855357	-0.824199	-0.365271	6
n412792:5084298	NONMMUT040968	0	-0.588194	-0.905457	-1.33486	-0.467609	6
n271314:4847280	NONMMUT042282	0	-0.380651	-1.32079	-1.33237	-0.471112	6
n275121:5349129	NONMMUT042289	0	-0.661511	-0.931366	-1.30597	-0.492157	6	akt
n284303:5476879	NONMMUT042296	0	-0.44691	-0.721161	-0.908794	-0.358263	6
n289561:4325310	NONMMUT044108	0	-0.494013	-0.858425	-0.876031	-0.475087	6
n272152:4325491	NONMMUT044967	0	-0.346772	-0.521101	-0.641848	-0.221158	6
n289260:5515524	NONMMUT045163	0	-0.272798	-0.45778	-0.715497	-0.16345	6
n283061:5488487	NONMMUT045689	0	-0.806664	-0.936715	-1.1716	-0.541078	6
n286230:4661549	NONMMUT045799	0	-0.64127	-0.97682	-1.33122	-0.41267	6
n288347:4555582	NONMMUT046731	0	-0.182358	-0.819443	-0.817012	-0.322693	6
n276453:5105842	NONMMUT047865	0	-0.677407	-1.22985	-1.08965	-0.495438	6
n277753:4819482	NONMMUT048013	0	-0.650151	-1.04002	-0.972658	-0.707808	6
n275904:5501861	NONMMUT048391	0	-0.340945	-0.858341	-1.26599	-0.401543	6	akt
n274861:4473801	NONMMUT051223	0	-0.397533	-0.973963	-0.99541	-0.401346	6
n286718:4423459	NONMMUT051225	0	-0.40145	-0.856838	-1.02369	-0.177552	6
n274415:4784299	NONMMUT051283	0	-1.05199	-1.26228	-1.547	-0.627578	6
n273902:5412406	NONMMUT051351	0	-0.234407	-0.473942	-0.633591	-0.267726	6
n277049:4782633	NONMMUT051357	0	-0.769037	-1.13155	-0.980972	-0.5427	6
n270391:4539854	NONMMUT052085	0	-0.339423	-0.629924	-0.722721	-0.405779	6
n282951:4315277	NONMMUT052212	0	-0.52654	-0.749235	-1.08668	-0.201868	6
n272320:4305394	NONMMUT055173	0	-0.540372	-0.81533	-0.827957	-0.416021	6
n276036:4541078	NONMMUT055912	0	-0.544656	-0.891132	-0.962778	-0.667484	6
n292531:5383385	NONMMUT060079	0	-0.409135	-0.795396	-1.12814	-0.168193	6
n276145:4565882	NONMMUT061356	0	-0.664199	-1.0797	-0.810688	-0.45318	6
n5241:5456326	NONMMUT061607	0	-0.681066	-1.57181	-1.6894	-0.682125	6
n289382:5452073	NONMMUT062744	0	-0.325613	-1.1521	-0.958532	-0.451953	6
n289382:4755542	NONMMUT062744	0	-0.317391	-0.507306	-0.484213	-0.183583	6
n277192:4752694	NONMMUT063537	0	-0.484795	-0.643784	-0.704477	-0.409756	6
n288339:5576894	NONMMUT064537	0	-0.34153	-0.967472	-0.977941	-0.392015	6
n286427:5140642	NONMMUT065328	0	-0.178404	-0.758383	-1.03026	-0.330089	6
n279414:5250313	NONMMUT065659	0	-0.561393	-1.09639	-0.946559	-0.183455	6
n267863:4773558	NONMMUT065736	0	-0.464566	-0.940627	-0.99805	-0.455053	6
n274385:4925468	NONMMUT066531	0	-0.459188	-1.1734	-1.26506	-0.366491	6
n279641:5283884	NONMMUT067081	0	-0.294572	-0.773659	-0.588605	-0.450656	6
n422337:4389568	NONMMUT067432	0	-0.29769	-0.580313	-0.760694	-0.362397	6
n273764:5108796	NONMMUT067800	0	-0.703819	-0.92157	-1.36996	-0.202135	6
n268802:4373708	NONMMUT068245	0	-0.465464	-0.836125	-0.87093	-0.500757	6
n268802:5473654	NONMMUT068245	0	-0.666796	-0.712132	-0.941856	-0.338726	6
n274218:5223225	NONMMUT068282	0	-0.123543	-0.565293	-0.737251	-0.292128	6
n288177:4907641	NONMMUT069567	0	-0.562969	-1.14924	-1.29199	-0.529357	6
n282263:5038156	NONMMUT070203	0	-0.396064	-0.778964	-0.711302	-0.208499	6
n197566:4465506	NONMMUT071966	0	-0.125605	-0.345157	-0.549003	-0.146037	6
n278798:4804689	NONMMUT007158	0	-0.210442	-0.572668	-0.315966	-0.418202	7
n289111:4438132	NONMMUT019673	0	-0.461244	-0.961465	-0.365879	-0.808514	7
n286179:5534540	NONMMUT023652	0	-0.433473	-0.775518	-0.422849	-0.766373	7
n270337:4797717	NONMMUT025938	0	-0.881236	-1.11435	-0.650832	-0.990974	7
ENSMUST00000098027:5345182	ENSMUST00000098027	0	-0.416329	-0.951155	-0.568868	-0.422218	8
ENSMUST00000136118:5092919	ENSMUST00000136118	0	-0.779609	-1.12347	-0.755293	-0.493261	8
ENSMUST00000151527:4315044	ENSMUST00000151527	0	-0.195478	-0.908361	-0.410535	-0.221758	8
ENSMUST00000151604:5005808	ENSMUST00000151604	0	-0.41428	-0.752162	-0.501166	-0.308913	8
ENSMUST00000157032:5552604	ENSMUST00000157032	0	-0.357066	-0.610892	-0.357066	-0.344099	8
ENSMUST00000173527:4958502	ENSMUST00000173527	0	-0.507765	-0.650767	-0.352548	-0.311208	8
n269116:4565518	n269116	0	-0.395535	-1.25576	-0.585303	-0.28283	8
n276698:5093589	NONMMUT000339	0	-0.803031	-1.16735	-0.743468	-0.71669	8
n275606:5610170	NONMMUT000493	0	-0.6242	-0.823819	-0.640146	-0.516508	8
n269380:4698467	NONMMUT003485	0	-0.405119	-1.12085	-0.469138	-0.527409	8
n279538:5041413	NONMMUT003981	0	-0.479259	-0.769835	-0.361583	-0.39685	8
n278383:4756976	NONMMUT004277	0	-0.974445	-1.06376	-0.613955	-0.612931	8
n343119:4650166	NONMMUT004541	0	-0.163033	-0.529674	-0.174809	-0.115633	8
n294442:5146050	NONMMUT005187	0	-0.65538	-1.29379	-0.715481	-0.658757	8
n286162:5144684	NONMMUT009301	0	-0.588773	-0.835839	-0.509967	-0.420722	8
n283110:4355729	NONMMUT014417	0	-0.749327	-1.49607	-1.05031	-0.587953	8
n295571:5210845	NONMMUT020732	0	-0.767634	-1.29128	-0.819658	-0.794773	8
n286508:5043844	NONMMUT020733	0	-0.314686	-0.766273	-0.192347	-0.282372	8
n282752:4395709	NONMMUT022363	0	-0.199586	-1.08348	-0.494822	-0.468109	8
n264993:5423862	NONMMUT022544	0	-0.369205	-1.01709	-0.384181	-0.229841	8
n273886:5374724	NONMMUT023422	0	-0.401361	-0.89838	-0.595238	-0.602278	8
n289309:4789298	NONMMUT026646	0	-0.600288	-0.821034	-0.525677	-0.390034	8
n290767:5531531	NONMMUT032584	0	-0.49262	-0.646763	-0.426036	-0.260749	8
n274855:4859735	NONMMUT038925	0	-0.385623	-1.48546	-0.853992	-0.519723	8
n287558:4633261	NONMMUT041748	0	-0.130208	-0.526778	-0.126722	-0.194751	8
n277554:4439243	NONMMUT042291	0	-0.661995	-1.1277	-0.6812	-0.518678	8
n267083:5201901	NONMMUT046732	0	-0.767416	-1.1948	-0.782362	-0.622155	8
n285641:5024491	NONMMUT048718	0	-0.545403	-0.899912	-0.637918	-0.579849	8
n420866:4644799	NONMMUT052938	0	-0.523079	-0.911436	-0.286455	-0.269496	8
n277197:5371726	NONMMUT054957	0	-0.154098	-0.445473	-0.264863	-0.270987	8
n285923:5304097	NONMMUT057588	0	-0.394396	-0.505445	-0.362007	-0.253489	8
n269376:5123323	NONMMUT062353	0	-0.687183	-1.11831	-0.697185	-0.670756	8
n285102:5449749	NONMMUT064540	0	-0.554917	-0.985211	-0.664564	-0.568101	8
n281252:4752172	NONMMUT067838	0	-0.71383	-0.895469	-0.625511	-0.414866	8
n293935:5615631	NONMMUT072910	0	-0.714156	-1.17366	-0.722269	-0.555933	8
n276737:5609161	NONMMUT073095	0	-0.58125	-0.848483	-0.569634	-0.369965	8
n272713:4825644	NONMMUT073336	0	-0.254	-0.524986	-0.316228	-0.172494	8
n274308:5253028	NONMMUT073338	0	-0.297935	-0.51486	-0.368471	-0.210951	8
ENSMUST00000130394:4440831	ENSMUST00000130394	0	-0.864158	-1.08542	-0.604162	-0.157483	9
ENSMUST00000132774:4364526	ENSMUST00000132774	0	-0.290405	-1.04387	-0.469098	-0.168784	9
ENSMUST00000137372:4719475	ENSMUST00000137372	0	-0.504321	-1.13092	-0.206086	0.0182216	9
ENSMUST00000145950:4675114	ENSMUST00000145950	0	-0.296668	-0.935699	-0.680736	-0.0781628	9
ENSMUST00000147799:4554068	ENSMUST00000147799	0	-0.759565	-1.18777	-0.660363	-0.244305	9
n343129:5530046	n343129	0	-0.283591	-0.475496	-0.369319	-0.0478859	9
n281568:4793906	NONMMUT002930	0	-0.667268	-1.12633	-0.857367	-0.314083	9
n290772:5173298	NONMMUT005453	0	-0.867365	-1.15204	-0.63078	-0.0304748	9
n289106:5401335	NONMMUT008643	0	-0.803879	-1.18088	-0.579289	-0.339928	9
n274833:5086865	NONMMUT014879	0	-0.546584	-0.918873	-0.645701	-0.145883	9
n283961:4373927	NONMMUT017322	0	-0.778208	-0.941664	-0.615328	-0.319877	9
n266129:4877259	NONMMUT018143	0	-0.506074	-0.831763	-0.468254	-0.120559	9
n280113:4801786	NONMMUT020931	0	-0.35213	-0.703835	-0.414398	-0.16848	9
n284244:4422017	NONMMUT023555	0	-0.194393	-0.911856	-0.5404	-0.10173	9
n277744:5111533	NONMMUT026604	0	-0.651969	-1.08212	-0.372785	-0.151437	9
n411797:4365424	NONMMUT035995	0	-0.852308	-1.05679	-0.598248	-0.139616	9
n288268:4415584	NONMMUT037677	0	-0.574971	-1.01055	-0.355557	-0.0851106	9
n288045:5260281	NONMMUT040174	0	-1.19416	-1.638	-1.29298	-0.518628	9
n414189:5470428	NONMMUT040754	0	-0.471595	-0.902317	-0.361864	-0.0722292	9
n276799:5234276	NONMMUT043539	0	-0.357487	-0.779732	-0.449101	-0.0242806	9
n274883:4910681	NONMMUT056687	0	-0.45186	-0.776638	-0.310116	-0.168816	9
n344146:5121037	NONMMUT056939	0	-0.42866	-0.912902	-0.524241	-0.192844	9
n286392:5472309	NONMMUT057511	0	-0.27021	-1.05601	-0.556798	-0.0968134	9
n276145:5045698	NONMMUT061356	0	-0.501711	-0.671525	-0.244907	-0.10844	9
n277086:5375252	NONMMUT062865	0	-0.54205	-0.86556	-0.414775	-0.0730231	9
n268987:5398540	NONMMUT063766	0	-0.331407	-0.79524	-0.332948	-0.152219	9
n269133:4901054	NONMMUT067903	0	-0.991262	-1.24068	-0.891283	-0.476251	9
n270505:5248355	NONMMUT073548	0	-0.665252	-1.03672	-0.266293	0.0329521	9
n281115:5342510	NONMMUT009947	0	-0.439448	-0.286648	-0.573702	-0.734235	10
ENSMUST00000124751:5391601	ENSMUST00000124751	0	-0.460924	-0.384853	-0.819647	-0.652855	11
n285976:4581024	NONMMUT006789	0	-0.344416	-0.275813	-0.707781	-0.529674	11
n272739:5239822	NONMMUT014314	0	-0.415665	-0.367474	-0.826694	-0.78893	11
ENSMUST00000123200:4332377	ENSMUST00000123200	0	-0.848504	-0.76932	-1.37274	-1.04755	12
ENSMUST00000123548:5083963	ENSMUST00000123548	0	-0.353431	-0.40328	-0.644148	-0.256754	12
ENSMUST00000124047:4586921	ENSMUST00000124047	0	-0.38257	-0.522632	-0.882668	-0.199468	12
ENSMUST00000125782:5059927	ENSMUST00000125782	0	-0.333579	-0.358259	-0.868237	-0.25265	12
ENSMUST00000126791:4596463	ENSMUST00000126791	0	-0.266762	-0.424456	-0.712253	-0.160164	12
ENSMUST00000127164:5434523	ENSMUST00000127164	0	-0.348036	-0.41456	-0.60896	-0.1946	12
ENSMUST00000127344:5171184	ENSMUST00000127344	0	-0.459119	-0.43614	-0.810574	-0.335258	12
ENSMUST00000127731:4327623	ENSMUST00000127731	0	-0.721506	-0.488728	-1.02878	-0.721506	12
ENSMUST00000128197:4837814	ENSMUST00000128197	0	-0.658896	-0.57583	-0.951284	-0.389065	12
ENSMUST00000128702:4734565	ENSMUST00000128702	0	-0.164874	-0.277149	-0.649619	-0.27328	12
ENSMUST00000129877:5140099	ENSMUST00000129877	0	-0.473842	-0.328723	-0.624422	-0.204363	12
ENSMUST00000131086:5147703	ENSMUST00000131086	0	-0.298149	-0.318828	-0.781932	-0.318828	12
ENSMUST00000132477:5437617	ENSMUST00000132477	0	-0.173794	-0.34892	-0.772655	-0.24162	12
ENSMUST00000135559:4831015	ENSMUST00000135559	0	-0.506665	-0.55102	-1.00632	-0.323162	12
ENSMUST00000135943:5470717	ENSMUST00000135943	0	-0.505547	-0.408193	-1.11714	-0.27795	12
ENSMUST00000136736:4803322	ENSMUST00000136736	0	-0.262436	-0.458665	-0.788903	-0.157482	12
ENSMUST00000137153:5294772	ENSMUST00000137153	0	-0.168817	-0.24191	-0.643863	-0.279982	12
ENSMUST00000138093:4594265	ENSMUST00000138093	0	-0.200442	-0.471984	-1.00264	-0.204911	12
ENSMUST00000140047:5100480	ENSMUST00000140047	0	-0.384453	-0.387064	-1.16608	-0.328683	12
ENSMUST00000140605:4700481	ENSMUST00000140605	0	-0.564758	-0.615375	-0.943494	-0.338355	12
ENSMUST00000140705:5104877	ENSMUST00000140705	0	-0.483135	-0.379952	-0.747874	-0.526347	12
ENSMUST00000140911:5328096	ENSMUST00000140911	0	-0.758647	-0.439299	-1.09122	-0.511751	12
ENSMUST00000141330:5521400	ENSMUST00000141330	0	-0.129616	-0.15317	-0.462488	-0.255689	12
ENSMUST00000141677:5603173	ENSMUST00000141677	0	-0.384429	-0.438065	-0.640772	-0.153187	12
ENSMUST00000141770:5400294	ENSMUST00000141770	0	-0.457484	-0.210713	-0.780469	-0.362584	12
ENSMUST00000145363:4350253	ENSMUST00000145363	0	-0.28163	-0.406995	-0.619306	-0.288171	12
ENSMUST00000148870:5514359	ENSMUST00000148870	0	-0.454627	-0.308854	-0.926899	-0.127462	12
ENSMUST00000149165:4932821	ENSMUST00000149165	0	-0.297016	-0.547293	-0.838202	-0.305929	12
ENSMUST00000150347:4950638	ENSMUST00000150347	0	-0.295587	-0.266256	-1.01242	-0.364889	12
ENSMUST00000150952:4349770	ENSMUST00000150952	0	-0.507411	-0.438099	-0.892971	-0.224671	12
ENSMUST00000153025:5078817	ENSMUST00000153025	0	-0.709554	-0.665821	-1.18795	-0.650472	12
ENSMUST00000154612:4359984	ENSMUST00000154612	0	-0.463667	-0.538607	-0.839083	-0.265256	12
ENSMUST00000155544:4487456	ENSMUST00000155544	0	-0.42715	-0.315594	-0.626712	-0.315594	12
ENSMUST00000155823:5091107	ENSMUST00000155823	0	-0.439664	-0.606097	-1.15624	-0.474763	12
ENSMUST00000162716:4676999	ENSMUST00000162716	0	-0.58267	-0.303447	-1.04293	-0.519505	12
ENSMUST00000175979:4489682	ENSMUST00000175979	0	-0.309359	-0.405248	-0.720272	-0.303466	12
ENSMUST00000177011:5369670	ENSMUST00000177011	0	-0.76785	-0.444213	-0.87792	-0.461164	12
ENSMUST00000180470:5254009	ENSMUST00000180470	0	-0.418676	-0.252711	-0.638087	-0.178362	12
ENSMUST00000181926:4559970	ENSMUST00000181926	0	-0.442292	-0.227454	-1.09473	-0.460745	12
n275269:4778318	n275269	0	-0.329426	-0.500956	-0.824645	-0.421039	12
n276126:5523618	n276126	0	-0.306658	-0.133465	-0.656522	-0.111646	12
n286573:4968338	n286573	0	-0.284964	-0.283221	-0.772382	-0.173526	12
n344427:5010819	n344427	0	-0.296669	-0.240036	-0.794341	-0.221415	12
n274510:5183326	NONMMUT000228	0	-0.280465	-0.474543	-1.03817	-0.350661	12
n275066:4851889	NONMMUT000396	0	-0.48076	-0.498364	-1.05086	-0.230495	12
n282720:4885634	NONMMUT001319	0	-0.587683	-0.577057	-0.939973	-0.401845	12
n276052:4654776	NONMMUT004848	0	-0.196259	-0.27226	-0.474273	-0.132554	12
n276156:5122654	NONMMUT005138	0	-0.227869	-0.405913	-0.895893	-0.346448	12
n283253:5594408	NONMMUT005188	0	-0.557855	-0.431868	-1.32753	-0.338558	12
n277394:5039042	NONMMUT005544	0	-0.681912	-0.756016	-1.42252	-0.463169	12
n276429:4921781	NONMMUT005924	0	-0.257661	-0.421445	-1.05057	-0.368068	12
n284043:4415088	NONMMUT007967	0	-0.465759	-0.372458	-0.958883	-0.189016	12
n286779:4450804	NONMMUT009104	0	-0.157066	-0.260748	-0.60308	-0.157066	12
n273361:4505872	NONMMUT009312	0	-1.22763	-1.1494	-1.60476	-0.737374	12
n277525:5312989	NONMMUT009850	0	-0.298153	-0.511822	-1.04457	-0.29335	12
n285813:5170736	NONMMUT010478	0	-0.554547	-0.431943	-0.762967	-0.250194	12
n275976:5004572	NONMMUT011045	0	-0.468065	-0.492608	-1.10187	-0.404516	12
n283081:4621675	NONMMUT011837	0	-0.207264	-0.415889	-0.859115	-0.33289	12
n286547:5461595	NONMMUT014102	0	-0.626442	-0.794865	-1.05885	-0.552322	12
n269824:5429536	NONMMUT014202	0	-0.831241	-0.559385	-1.02724	-0.455973	12
n274866:5384620	NONMMUT014378	0	-0.414301	-0.659676	-1.02015	-0.418579	12
n279328:4780647	NONMMUT014665	0	-0.290708	-0.504249	-0.745273	-0.326699	12
n268455:5298235	NONMMUT014775	0	-0.645906	-0.685843	-1.43515	-0.645906	12
n276151:5264244	NONMMUT014958	0	-0.295083	-0.346357	-0.759158	-0.205216	12
n274427:5611627	NONMMUT015202	0	-0.253535	-0.341035	-0.979178	-0.267964	12
n282422:4350597	NONMMUT015392	0	-0.561514	-0.322759	-0.835404	-0.322759	12
n291019:4703935	NONMMUT015862	0	-0.521057	-0.439482	-0.694514	-0.479793	12
n278920:4802886	NONMMUT015920	0	-0.400877	-0.615508	-0.958576	-0.228078	12
n277380:4870676	NONMMUT015949	0	-0.424999	-0.439296	-0.853539	-0.101583	12
n279025:5270347	NONMMUT016268	0	-0.314828	-0.436096	-0.785551	-0.175458	12
n282504:5348421	NONMMUT019670	0	-0.351607	-0.396972	-0.862866	-0.412515	12
n286341:4520570	NONMMUT020411	0	-0.391194	-0.434525	-0.968371	-0.302843	12
n268339:4556881	NONMMUT020416	0	-0.853263	-0.615364	-1.09266	-0.357527	12
n275437:4542357	NONMMUT020425	0	-0.358649	-0.690047	-1.56281	-0.473215	12
n274548:4866882	NONMMUT020427	0	-0.859867	-0.833167	-1.28812	-0.669878	12	akt
n274548:5359178	NONMMUT020427	0	-0.569571	-0.724656	-1.04535	-0.505924	12	akt
n274105:5481554	NONMMUT021286	0	-0.268905	-0.382998	-0.557831	-0.233994	12
n279405:5085311	NONMMUT021906	0	-0.580525	-0.438124	-1.10638	-0.700438	12
n273896:5516246	NONMMUT021910	0	-0.346845	-0.219967	-0.560962	-0.282421	12
n286571:5290093	NONMMUT021913	0	-0.226604	-0.302281	-0.533881	-0.265732	12
n277423:5264747	NONMMUT021917	0	-0.517118	-0.675523	-0.961117	-0.596091	12
n279483:4435391	NONMMUT021918	0	-0.369287	-0.458297	-0.73461	-0.276564	12
n284941:5556337	NONMMUT021919	0	-0.281806	-0.460093	-0.783295	-0.207176	12
n279660:5341017	NONMMUT021921	0	-0.359	-0.344785	-0.572288	-0.403738	12
n274362:5540174	NONMMUT021924	0	-0.281606	-0.252197	-0.634775	-0.141984	12
n270022:5610898	NONMMUT021925	0	-0.668402	-0.559003	-1.1347	-0.48331	12
n286556:5229064	NONMMUT021926	0	-0.224991	-0.373927	-0.637014	-0.262977	12
n286556:5235367	NONMMUT021926	0	-0.207379	-0.307497	-0.570651	-0.283101	12
n273424:5269748	NONMMUT021928	0	-0.230552	-0.373324	-0.610883	-0.268457	12
n286490:5084286	NONMMUT022571	0	-0.522537	-0.581479	-1.20946	-0.359244	12
n289022:4639914	NONMMUT022574	0	-0.4419	-0.711606	-1.27082	-0.329509	12
n278689:4378588	NONMMUT022874	0	-0.350814	-0.62756	-0.946166	-0.35361	12
n286646:4981374	NONMMUT023382	0	-0.22917	-0.301994	-0.630974	-0.143293	12
n267174:5472835	NONMMUT023796	0	-0.647864	-0.466298	-1.15009	-0.28173	12
n282351:4721395	NONMMUT023865	0	-0.265682	-0.281628	-0.575242	-0.296498	12
n274413:5246743	NONMMUT024027	0	-0.544322	-0.609624	-0.780731	-0.402605	12
n277059:5301574	NONMMUT026613	0	-0.511637	-0.639989	-1.16084	-0.383417	12
n271475:4455090	NONMMUT026624	0	-0.830095	-0.490295	-0.990628	-0.412572	12
n274571:4310884	NONMMUT026640	0	-0.459491	-0.226905	-0.602665	-0.315573	12
n274571:4504926	NONMMUT026640	0	-0.7149	-0.685522	-1.04985	-0.41647	12
n277300:4967935	NONMMUT027143	0	-0.588186	-0.633562	-1.11375	-0.178996	12
n274767:4862312	NONMMUT027201	0	-0.679375	-0.753479	-1.16092	-0.837564	12	akt not sig
n279374:4430099	NONMMUT027273	0	-0.593635	-0.582232	-0.940536	-0.6657	12
n269298:4469492	NONMMUT027445	0	-0.577892	-0.599134	-1.17211	-0.350869	12	akt
n293470:5023375	NONMMUT027569	0	-0.136715	-0.259201	-0.591098	-0.196796	12
n294601:4325186	NONMMUT029067	0	-0.26386	-0.398203	-0.806333	-0.217809	12
n413580:5606317	NONMMUT029119	0	-0.257786	-0.43486	-0.925233	-0.287029	12
n276993:4735554	NONMMUT031587	0	-1.02177	-0.867688	-1.2643	-0.52713	12
n276860:4552979	NONMMUT032144	0	-0.769834	-0.714746	-1.34874	-0.569685	12
n286691:4550728	NONMMUT032391	0	-0.589072	-0.730926	-1.38239	-0.333227	12
n279544:5385526	NONMMUT032959	0	-0.356969	-0.564467	-1.14748	-0.229177	12
n282871:5040870	NONMMUT033152	0	-0.297024	-0.391168	-0.99867	-0.202024	12
n277889:4763464	NONMMUT033904	0	-0.469733	-0.526528	-0.809778	-0.22004	12
n265148:4906326	NONMMUT034449	0	-0.527399	-0.44753	-0.802808	-0.230119	12
n296787:5147405	NONMMUT035278	0	-0.428318	-0.332563	-0.999543	-0.117715	12
n284989:5601943	NONMMUT037072	0	-0.315707	-0.405899	-0.756975	-0.133677	12
n277474:5203163	NONMMUT037344	0	-0.554315	-0.363966	-0.625037	-0.307711	12
n276490:4429080	NONMMUT038059	0	-0.549388	-0.674622	-1.18569	-0.326688	12
n282779:5574933	NONMMUT038518	0	-0.691738	-0.637191	-0.958339	-0.474798	12	akt not sig
n286553:4939889	NONMMUT041904	0	-0.13888	-0.196498	-0.619873	-0.254173	12
n278445:4667511	NONMMUT041963	0	-0.307268	-0.364012	-0.904048	-0.254087	12
n277990:5439628	NONMMUT042185	0	-0.464481	-0.595498	-1.20622	-0.340285	12
n415306:4518039	NONMMUT042187	0	-0.192179	-0.27223	-0.587562	-0.202295	12
n277554:4395967	NONMMUT042291	0	-0.345948	-0.308762	-0.785731	-0.518625	12
n276558:5201884	NONMMUT042294	0	-0.430645	-0.0809938	-0.74913	-0.341041	12
n278881:4762961	NONMMUT042535	0	-0.529987	-0.32403	-0.796665	-0.590025	12
n267112:5436357	NONMMUT042906	0	-0.722649	-0.477824	-1.15373	-0.159341	12
n263557:4726960	NONMMUT043560	0	-1.12023	-0.694559	-1.45042	-0.427094	12
n294350:4888230	NONMMUT043579	0	-0.727893	-1.03569	-1.61528	-0.483411	12
n282231:4918028	NONMMUT045141	0	-0.403499	-0.596001	-0.918911	-0.301336	12
n267700:4611662	NONMMUT045184	0	-0.418069	-0.576151	-0.953133	-0.0982718	12
n278408:5482571	NONMMUT045895	0	-0.571516	-0.777178	-1.3638	-0.495585	12
n278714:4565573	NONMMUT047244	0	-0.606034	-0.288718	-1.16536	-0.493231	12
n276017:5448156	NONMMUT047992	0	-0.356087	-0.198587	-0.600777	-0.136869	12
n265094:4546462	NONMMUT048370	0	-0.207294	-0.234652	-0.807936	-0.349941	12
n286699:5120693	NONMMUT049810	0	-0.183543	-0.368094	-0.907809	-0.22198	12
n264637:5513185	NONMMUT050612	0	-0.34521	-0.202159	-0.592096	-0.189064	12
n274861:5514253	NONMMUT051223	0	-0.465093	-0.426826	-0.810113	-0.121826	12
n264806:5497083	NONMMUT051340	0	-0.462242	-0.236033	-0.927747	-0.100581	12
n276128:5072101	NONMMUT051355	0	-0.422749	-0.7031	-1.24391	-0.264814	12
n282951:5549942	NONMMUT052212	0	-0.722885	-0.766696	-1.04893	-0.427591	12
n275327:5354437	NONMMUT052917	0	-0.733973	-0.256125	-0.997754	-0.512852	12
n274484:5045810	NONMMUT054688	0	-0.187388	-0.310778	-0.519516	-0.217613	12
n274159:4595296	NONMMUT054824	0	-0.619676	-0.501424	-0.779507	-0.386693	12
n276255:5156841	NONMMUT055118	0	-0.819868	-0.811749	-1.40894	-0.348657	12
n283277:4913912	NONMMUT055492	0	-0.327771	-0.517665	-1.28229	-0.279501	12
n276036:4566864	NONMMUT055912	0	-0.45379	-0.667704	-1.0721	-0.412146	12
n283002:4482336	NONMMUT055914	0	-0.487448	-0.492792	-1.03219	-0.390183	12
n278616:5552363	NONMMUT056255	0	-0.968869	-0.544616	-1.22637	-0.616308	12
n285506:5475503	NONMMUT056384	0	-0.960711	-1.15073	-1.61097	-0.864694	12
n274817:4889971	NONMMUT056680	0	-0.752834	-0.713683	-1.17758	-0.734574	12
n289506:4487169	NONMMUT056685	0	-0.780803	-0.617348	-1.50176	-0.731566	12
n279696:4639201	NONMMUT057234	0	-0.291803	-0.327548	-0.765496	-0.381627	12
n284914:5300735	NONMMUT057237	0	-0.260334	-0.394503	-0.860047	-0.183988	12
n274540:5601977	NONMMUT057509	0	-0.468883	-0.503002	-1.11895	-0.583448	12
n286392:4420406	NONMMUT057511	0	-0.671779	-0.206379	-0.985013	-0.385937	12
n266649:4592328	NONMMUT057912	0	-0.404447	-0.262177	-0.694584	-0.312312	12
n286546:4910224	NONMMUT059598	0	-0.650852	-0.668278	-1.34062	-0.165304	12
n273570:4952907	NONMMUT059651	0	-0.713864	-0.591273	-1.27673	-0.116042	12
n267299:5459356	NONMMUT060134	0	-0.223169	-0.225077	-0.523805	-0.204513	12
n297388:4711202	NONMMUT061368	0	-0.369548	-0.463442	-0.832932	-0.219331	12
n277123:5530670	NONMMUT061402	0	-0.289689	-0.315747	-0.823845	-0.327798	12
n286542:4764857	NONMMUT061403	0	-0.276154	-0.314416	-0.715872	-0.277715	12
n277099:5388892	NONMMUT061411	0	-0.278676	-0.347783	-1.09172	-0.385439	12
n283057:4713980	NONMMUT061412	0	-0.769256	-0.557667	-1.15849	-0.544717	12
n274088:4990912	NONMMUT061423	0	-0.857767	-0.814643	-2.01345	-0.55769	12
n286165:4353652	NONMMUT061424	0	-0.281454	-0.276726	-0.831286	-0.257757	12
n264718:5133965	NONMMUT061426	0	-0.234779	-0.219587	-0.541779	-0.198493	12
n281597:5157655	NONMMUT061431	0	-0.351224	-0.152709	-1.07194	-0.454985	12
n421715:4533223	NONMMUT061719	0	-0.393609	-0.327819	-0.979141	-0.44247	12
n283154:5292620	NONMMUT061932	0	-0.543682	-0.601943	-1.16265	-0.520759	12
n276776:5245171	NONMMUT062345	0	-0.478914	-0.529968	-1.04875	-0.419831	12
n286427:5239413	NONMMUT065328	0	-0.926724	-0.809051	-1.17108	-0.620547	12
n274657:4376078	NONMMUT065501	0	-0.598092	-0.423456	-0.890688	-0.478244	12
n275779:5566482	NONMMUT066494	0	-0.45141	-0.5444	-1.17811	-0.250102	12
n276692:4966949	NONMMUT068327	0	-0.521924	-0.458279	-1.00158	-0.375134	12
n282223:5350589	NONMMUT068938	0	-0.545663	-0.260048	-0.944463	-0.364013	12
n274191:4494737	NONMMUT069032	0	-0.922432	-0.408203	-0.979823	-0.572853	12
n274191:5372885	NONMMUT069032	0	-0.652035	-0.449475	-1.16781	-0.328249	12
n282263:4362693	NONMMUT070203	0	-0.471081	-0.522042	-0.729732	-0.386348	12
n281645:4656842	NONMMUT071121	0	-0.515365	-0.369555	-0.980784	-0.326207	12
n289234:4862066	NONMMUT072615	0	-0.327886	-0.285176	-0.808816	-0.415593	12
n275850:4371210	NONMMUT072616	0	-0.254001	-0.239668	-0.658843	-0.396996	12
n289445:4372204	NONMMUT073591	0	-0.146416	-0.214617	-0.461711	-0.154659	12
n288180:4658790	NONMMUT074495	0	-0.335475	-0.581809	-1.01795	-0.195019	12
NR_075074:4445285	NR_075074	0	-0.25325	-0.372325	-0.596962	-0.134601	12
ENSMUST00000131715:5329612	ENSMUST00000131715	0	-0.478246	-0.536568	-0.374857	-1.07661	13
n277167:4358456	NONMMUT021282	0	-0.513436	-0.420648	-0.403555	-0.841029	13
n277267:5124388	NONMMUT026605	0	-0.414265	-0.462141	-0.52933	-0.800443	13
n290446:4818122	NONMMUT069862	0	-0.525078	-0.529438	-0.531958	-0.804812	13
n280878:5330199	NONMMUT070785	0	-0.743788	-0.541867	-0.18483	-1.08077	13
ENSMUST00000123905:5397459	ENSMUST00000123905	0	-0.927295	-0.819433	-1.03602	-0.539559	14
ENSMUST00000125047:5609983	ENSMUST00000125047	0	-0.742622	-0.880362	-0.763493	-0.588289	14
ENSMUST00000125559:5188342	ENSMUST00000125559	0	-0.527834	-0.618635	-0.379204	-0.506982	14
ENSMUST00000128197:4996491	ENSMUST00000128197	0	-0.664433	-0.664433	-0.906662	-0.712143	14
ENSMUST00000128272:5131377	ENSMUST00000128272	0	-0.993816	-0.471636	-0.748447	-0.524905	14
ENSMUST00000134014:5179595	ENSMUST00000134014	0	-0.683075	-0.34993	-0.419485	-0.272082	14
ENSMUST00000136164:4599126	ENSMUST00000136164	0	-0.738279	-0.552839	-0.504642	-0.344142	14
ENSMUST00000139744:4486327	ENSMUST00000139744	0	-1.35378	-1.08157	-1.64788	-1.19421	14
ENSMUST00000139766:4437128	ENSMUST00000139766	0	-0.862327	-0.561386	-0.610232	-0.627159	14
ENSMUST00000172394:4783132	ENSMUST00000172394	0	-0.681733	-0.417017	-0.590877	-0.457556	14
ENSMUST00000173219:5407106	ENSMUST00000173219	0	-1.25576	-0.8362	-0.775303	-0.581447	14
n266968:4430043	n266968	0	-0.842711	-1.005	-0.898344	-0.617168	14
n277325:5098267	n277325	0	-0.823578	-0.550153	-0.42051	-0.37636	14
n280892:5575795	n280892	0	-0.773834	-0.795694	-0.854992	-0.65653	14
n287643:5614309	n287643	0	-0.984569	-0.85634	-0.841673	-0.645481	14
n285121:4425265	NONMMUT000405	0	-0.652756	-0.893677	-0.768682	-0.626302	14
n283049:5365484	NONMMUT002194	0	-0.803871	-0.583049	-0.48574	-0.541299	14
n278927:5117431	NONMMUT002427	0	-0.852452	-0.875813	-1.06616	-0.80488	14
n269403:4467742	NONMMUT009089	0	-0.859159	-0.539017	-0.829011	-0.645227	14
n263595:5235432	NONMMUT009297	0	-0.627346	-0.706167	-0.905463	-0.629747	14
n286397:4339179	NONMMUT009304	0	-0.984235	-0.753433	-1.08414	-0.680627	14
n282235:5385315	NONMMUT011534	0	-0.470028	-0.59008	-0.669778	-0.596482	14
n268228:5538785	NONMMUT021904	0	-0.874313	-0.983123	-0.892941	-1.18877	14
n288548:4667624	NONMMUT021920	0	-1.03264	-1.03299	-0.88733	-0.592471	14
n282953:5041517	NONMMUT022365	0	-1.0668	-0.95323	-1.11162	-0.583115	14
n269620:5434877	NONMMUT022855	0	-0.701876	-0.593077	-0.637428	-0.629926	14
n270237:5341929	NONMMUT025941	0	-1.01033	-1.08729	-1.29135	-0.900225	14
n288981:4976675	NONMMUT026631	0	-0.78869	-0.835544	-0.782625	-0.592665	14
n277412:4718508	NONMMUT027204	0	-0.97957	-0.748431	-0.555473	-0.421856	14
n274903:4994014	NONMMUT027225	0	-1.27338	-0.936785	-1.09547	-0.97572	14
n268259:4756418	NONMMUT027268	0	-0.966187	-0.824639	-1.07715	-0.771334	14	akt not sig
n269298:5399090	NONMMUT027445	0	-0.50022	-0.592441	-0.613522	-0.560265	14	akt not sig
n279624:5604339	NONMMUT031134	0	-0.545318	-0.678968	-0.523602	-0.581725	14
n293415:5526052	NONMMUT032224	0	-0.821526	-0.9397	-0.880816	-1.075	14
n274432:4635693	NONMMUT037063	0	-0.706884	-0.701583	-0.770652	-0.626446	14
n285428:5302752	NONMMUT042451	0	-0.963783	-0.454723	-0.769645	-0.631807	14
n269564:4866795	NONMMUT044964	0	-1.0749	-0.747411	-0.957761	-0.782183	14
n268242:4829856	NONMMUT046725	0	-0.853576	-0.916728	-0.868465	-0.496998	14
n291550:4741528	NONMMUT047430	0	-1.1182	-0.891358	-0.740734	-0.590634	14
n416521:4402922	NONMMUT049701	0	-0.445852	-0.530543	-0.666416	-0.464741	14
n286699:5600564	NONMMUT049810	0	-0.687282	-0.875424	-0.756015	-0.728459	14
n264806:5606997	NONMMUT051340	0	-1.06403	-0.518002	-0.614173	-0.480937	14
n273902:4851059	NONMMUT051351	0	-0.712611	-0.436145	-0.324927	-0.411662	14
n277729:4920425	NONMMUT051642	0	-0.799212	-0.913608	-0.959121	-0.699772	14
n288200:5188793	NONMMUT052217	0	-0.845525	-0.534146	-0.512485	-0.672335	14
n279181:4475019	NONMMUT055908	0	-0.765716	-0.950469	-1.12539	-0.825849	14
n264784:5571359	NONMMUT055921	0	-0.913882	-0.615725	-0.836351	-0.437109	14
n287196:5429810	NONMMUT056777	0	-0.911808	-0.762798	-0.611442	-0.455382	14
n284425:5264654	NONMMUT061200	0	-0.950138	-0.681292	-0.681534	-0.48373	14
n277704:4924036	NONMMUT061609	0	-0.868732	-0.85327	-1.07926	-0.673767	14
n286396:5427136	NONMMUT065324	0	-0.898001	-0.601748	-0.876734	-0.692686	14
n271426:5556362	NONMMUT065327	0	-0.963461	-0.760052	-1.02895	-0.666611	14
n284296:5568450	NONMMUT068392	0	-1.13453	-0.841441	-0.90865	-0.834769	14
ENSMUST00000115992:4425655	ENSMUST00000115992	0	-0.787968	-0.528972	-0.736618	-0.354478	15
ENSMUST00000117124:4661614	ENSMUST00000117124	0	-0.967526	-0.592481	-0.942318	-0.329026	15
ENSMUST00000124672:4447198	ENSMUST00000124672	0	-0.772974	-0.553893	-1.23699	0.110374	15
ENSMUST00000126673:4700134	ENSMUST00000126673	0	-1.01081	-0.723215	-0.728904	-0.0823093	15
ENSMUST00000129720:5485533	ENSMUST00000129720	0	-0.961166	-0.516457	-0.746587	-0.306739	15
ENSMUST00000132013:4398395	ENSMUST00000132013	0	-0.72071	-0.450399	-0.941276	-0.0794576	15
ENSMUST00000140733:5119048	ENSMUST00000140733	0	-0.886963	-0.692924	-0.641176	-0.335393	15
ENSMUST00000142084:5072442	ENSMUST00000142084	0	-0.755057	-0.574352	-0.910814	0.0396276	15
ENSMUST00000143887:4441885	ENSMUST00000143887	0	-0.384721	-0.287989	-0.513913	-0.0213076	15
ENSMUST00000147943:4468847	ENSMUST00000147943	0	-0.42823	-0.515649	-0.620367	-0.121285	15
ENSMUST00000148845:4376628	ENSMUST00000148845	0	-0.72901	-0.753432	-0.626937	-0.28958	15
ENSMUST00000153095:4393093	ENSMUST00000153095	0	-0.96743	-0.680177	-0.970834	-0.390343	15
ENSMUST00000154262:5374179	ENSMUST00000154262	0	-0.779755	-0.773459	-1.02198	0.0261994	15
ENSMUST00000166302:4829950	ENSMUST00000166302	0	-1.1344	-0.770955	-0.931135	-0.104006	15
ENSMUST00000175820:5448162	ENSMUST00000175820	0	-0.61286	-0.491447	-0.43406	-0.153223	15
ENSMUST00000181622:5461817	ENSMUST00000181622	0	-1.10461	-1.00962	-1.24105	-0.496677	15
FR0325265:5442714	FR0325265	0	-0.893607	-0.454418	-0.677078	0.00984007	15
n263980:4542666	n263980	0	-0.54061	-0.493191	-1.05863	0.124643	15
n282058:5047640	n282058	0	-0.580628	-0.488113	-0.791948	-0.212253	15
n295660:5410745	n295660	0	-0.546695	-0.391156	-0.780442	-0.0332795	15
n267192:5136439	NONMMUT002765	0	-0.781632	-0.987728	-1.07823	-0.157962	15
n275737:5437150	NONMMUT004126	0	-0.805714	-0.718404	-0.82864	-0.218464	15	akt not sig
n269807:4470100	NONMMUT005937	0	-0.654076	-0.633174	-0.473952	-0.280889	15
n290856:4332972	NONMMUT007590	0	-0.767886	-0.429492	-0.359183	-0.111736	15
n277319:5370352	NONMMUT011340	0	-0.942311	-0.800211	-0.5358	-0.289264	15
n274554:4510475	NONMMUT011911	0	-1.10381	-0.857532	-0.66154	-0.198302	15
n275134:4722008	NONMMUT012317	0	-1.02633	-0.582778	-0.551811	-0.149617	15
n274710:4799801	NONMMUT012830	0	-0.677942	-0.533607	-0.479571	-0.14551	15
n289752:4644211	NONMMUT013293	0	-1.02605	-0.914355	-1.22018	-0.245307	15
n285054:4847419	NONMMUT014960	0	-0.919409	-1.01584	-1.40327	-0.139996	15
n278449:4455636	NONMMUT015450	0	-0.529981	-0.89307	-0.941165	0.0310591	15
n263537:4610943	NONMMUT015697	0	-0.618366	-0.474071	-0.510906	-0.161143	15
n263537:5520244	NONMMUT015697	0	-0.916925	-0.886315	-0.852915	-0.282683	15
n268430:4626056	NONMMUT019036	0	-0.661461	-0.769182	-1.1667	-0.0977306	15
n272348:4813496	NONMMUT020706	0	-0.777186	-0.804978	-0.806056	-0.306517	15
n276815:5089751	NONMMUT021670	0	-0.668496	-0.857521	-0.580853	-0.052118	15
n277879:4405829	NONMMUT022421	0	-0.856218	-0.66307	-0.763854	-0.276001	15
n289022:5601050	NONMMUT022574	0	-0.613419	-0.862283	-0.708596	-0.168139	15
n290035:4980664	NONMMUT022618	0	-0.506087	-0.686813	-0.56034	-0.0726304	15
n418664:5102270	NONMMUT024187	0	-0.550504	-0.356935	-0.703934	-0.152085	15
n274373:4678233	NONMMUT024618	0	-0.918307	-0.576582	-0.47978	-0.0715857	15
n277555:4591507	NONMMUT025300	0	-0.787738	-1.05077	-1.13706	-0.29122	15
n269917:4446787	NONMMUT025362	0	-0.750269	-0.896066	-0.86719	-0.305506	15
n274089:4426180	NONMMUT026641	0	-0.890707	-0.84309	-0.96478	-0.394065	15
n274089:4736953	NONMMUT026641	0	-1.11773	-0.980606	-1.15771	-0.515317	15
n271806:5540806	NONMMUT027374	0	-0.621303	-0.692064	-0.417505	0.0760655	15
n268620:5285801	NONMMUT027814	0	-0.596698	-0.551735	-0.412405	-0.0277768	15
n287971:5028739	NONMMUT028187	0	-0.65636	-0.51048	-0.808354	-0.0591728	15
n286691:5474240	NONMMUT032391	0	-0.741407	-0.663415	-0.772838	-0.31556	15
n275032:4387096	NONMMUT032957	0	-0.929184	-1.03406	-1.05893	-0.177315	15
n277818:5500028	NONMMUT034197	0	-0.266406	-0.252692	-0.401494	-0.0356936	15
n267500:5246985	NONMMUT034346	0	-0.581161	-0.310318	-0.348071	-0.069561	15
n275990:4608318	NONMMUT035505	0	-0.914719	-1.0635	-0.818111	-0.180347	15
n282353:5477227	NONMMUT037584	0	-0.959529	-1.20055	-0.889098	-0.295014	15
n279188:4887330	NONMMUT038127	0	-1.18977	-0.723219	-0.678117	-0.286558	15
n289613:4366247	NONMMUT038129	0	-0.44065	-0.425539	-0.599422	-0.198327	15
n289063:5235582	NONMMUT038985	0	-0.664458	-0.753838	-0.512884	-0.113137	15
n266171:4912772	NONMMUT039897	0	-0.589054	-0.43718	-0.312487	-0.129832	15
n267668:4457608	NONMMUT042271	0	-0.480647	-0.474795	-0.749735	-0.0175009	15
n289550:5012245	NONMMUT042540	0	-0.616511	-0.780561	-0.961504	-0.234712	15
n274684:5588510	NONMMUT046662	0	-0.592243	-0.651096	-0.978133	-0.113632	15
n286731:5055988	NONMMUT046713	0	-0.634539	-0.839745	-0.834378	-0.250017	15
n280896:5153843	NONMMUT046907	0	-0.442284	-0.292118	-0.323226	0.0240893	15
n280896:5424566	NONMMUT046907	0	-0.497541	-0.301869	-0.379043	0.0240163	15
n289262:4508539	NONMMUT047475	0	-0.74957	-0.980808	-1.58639	-0.160489	15
n282787:5524032	NONMMUT047715	0	-0.747633	-0.666608	-0.72194	-0.0698743	15
n286718:4880926	NONMMUT051225	0	-0.404996	-0.479301	-0.624979	-0.0359581	15
n286718:5562541	NONMMUT051225	0	-0.590324	-0.773605	-0.677297	-0.225046	15
n271551:5284389	NONMMUT052366	0	-0.659252	-0.382338	-0.72697	-0.113236	15
n277650:4373717	NONMMUT052661	0	-0.425826	-0.451529	-0.677187	0.131917	15
n277490:5336292	NONMMUT052664	0	-0.484982	-0.513145	-0.370152	0.0277019	15
n277015:5281981	NONMMUT054271	0	-0.732866	-0.92394	-0.788922	-0.249968	15
n283002:4760590	NONMMUT055914	0	-0.894047	-0.716843	-1.17916	-0.32328	15
n270973:5229720	NONMMUT056138	0	-0.780249	-0.872633	-0.813309	-0.370448	15
n287196:5214065	NONMMUT056777	0	-0.576959	-0.575648	-0.78631	-0.223501	15
n277196:4629324	NONMMUT061789	0	-0.913137	-0.723062	-1.15764	-0.180025	15
n277130:5003707	NONMMUT062123	0	-0.764681	-0.59607	-0.49594	-0.25544	15
n289373:5594167	NONMMUT066858	0	-0.95264	-0.540036	-0.804321	-0.401078	15
n287415:4772533	NONMMUT068902	0	-0.506879	-0.551623	-1.02069	0.0012291	15
n289328:5210762	NONMMUT070170	0	-0.54242	-0.683312	-1.15708	-0.0941597	15
n281645:5246393	NONMMUT071121	0	-1.18236	-1.67808	-1.73166	-0.407948	15
n287892:4869317	NONMMUT071181	0	-0.546315	-0.380352	-0.831746	-0.0631967	15
n293525:4524539	NONMMUT073501	0	-0.599281	-0.450151	-0.996035	-0.0448191	15
ENSMUST00000132997:5599290	ENSMUST00000132997	0	-1.26393	-1.15231	-0.548853	-0.8049	16
ENSMUST00000141928:5356404	ENSMUST00000141928	0	-0.980101	-0.726175	-0.302391	-0.628329	16
n272465:4938705	NONMMUT003979	0	-0.733668	-0.842727	-0.0686107	-0.592405	16
n285483:5440401	NONMMUT040677	0	-1.07374	-0.932354	-0.451508	-0.933922	16
n279196:5152773	NONMMUT065656	0	-0.727732	-0.608	-0.365516	-0.664649	16
ENSMUST00000126496:4941704	ENSMUST00000126496	0	-0.901056	-0.645316	-0.16169	0.182938	17
ENSMUST00000128978:4714391	ENSMUST00000128978	0	-0.611768	-0.673203	-0.242906	0.04159	17
ENSMUST00000133806:4668395	ENSMUST00000133806	0	-0.696212	-0.391375	-0.184778	-0.242562	17
ENSMUST00000147102:4725056	ENSMUST00000147102	0	-0.523425	-0.635339	-0.248112	-0.203179	17
ENSMUST00000159733:5280206	ENSMUST00000159733	0	-1.1348	-0.997117	-0.476731	-0.135453	17
n268092:4531418	NONMMUT004002	0	-0.65576	-0.674432	-0.194951	-0.113625	17
n285687:4567165	NONMMUT009433	0	-1.15963	-0.764703	-0.50694	-0.105965	17
n285975:4539917	NONMMUT010137	0	-0.938895	-0.519987	-0.0764655	0.0161421	17
n285490:5332973	NONMMUT023038	0	-1.09461	-0.963415	-0.219884	0.0836575	17
n272326:4307048	NONMMUT027251	0	-1.20571	-1.18581	-0.689166	-0.442753	17
n284402:4390104	NONMMUT052739	0	-0.942884	-0.890249	-0.486445	-0.339493	17
n279776:5070820	NONMMUT055874	0	-0.954448	-0.568952	-0.359029	-0.144464	17
n274182:4978600	NONMMUT061149	0	-1.25168	-0.840876	-0.468768	-0.196672	17
n277004:4553500	NONMMUT061759	0	-0.906163	-0.93978	-0.419751	-0.478997	17
n268442:4782431	NONMMUT062874	0	-0.995093	-0.688235	-0.459184	-0.392841	17
ENSMUST00000149527:4745131	ENSMUST00000149527	0	-0.327342	-0.312332	0.0647896	0.868274	18
ENSMUST00000174611:4529535	ENSMUST00000174611	0	-0.459249	-0.550834	0.292763	0.698459	18
n286610:4894660	NONMMUT027415	0	-0.411764	-0.676029	0.290503	0.588245	18
n286806:5541590	NONMMUT060110	0	-0.443729	-0.289517	0.216267	0.989297	18
ENSMUST00000129374:4309069	ENSMUST00000129374	0	-1.06729	-0.445175	-0.766485	-0.690027	20
ENSMUST00000148296:5264030	ENSMUST00000148296	0	-1.1353	-0.341073	-0.696889	-0.726488	20
n273244:4746628	NONMMUT011050	0	-1.43465	-0.366946	-1.13803	-0.811402	20
n279623:4515393	NONMMUT014424	0	-0.978309	-0.220082	-1.06932	-0.925241	20
ENSMUST00000125722:4734075	ENSMUST00000125722	0	-0.791186	-0.373294	-0.631563	-0.329408	21
ENSMUST00000132774:4473462	ENSMUST00000132774	0	-1.05579	-0.386807	-0.761956	-0.0721299	21
ENSMUST00000134671:4492943	ENSMUST00000134671	0	-0.58732	-0.275611	-0.570772	-0.170927	21
ENSMUST00000136073:4732384	ENSMUST00000136073	0	-0.966226	-0.481429	-0.859068	-0.380383	21
ENSMUST00000153526:4956201	ENSMUST00000153526	0	-0.629371	-0.277436	-0.664655	-0.297643	21
ENSMUST00000153636:4649486	ENSMUST00000153636	0	-1.00116	-0.398992	-0.991225	-0.0864244	21
ENSMUST00000155911:4876365	ENSMUST00000155911	0	-0.610324	-0.0792406	-0.333972	0.0937653	21
ENSMUST00000159385:4542101	ENSMUST00000159385	0	-1.15983	-0.407468	-0.95904	-0.60594	21
ENSMUST00000162463:5045253	ENSMUST00000162463	0	-1.19131	-0.0816773	-0.881469	-0.485885	21
ENSMUST00000172718:4639169	ENSMUST00000172718	0	-0.663104	-0.202443	-0.930025	-0.0184476	21
n344422:5350269	n344422	0	-0.713276	-0.216642	-1.05766	-0.085119	21
n277852:5447484	NONMMUT000203	0	-0.869512	-0.324342	-0.502133	-0.217535	21
n286623:5574776	NONMMUT000757	0	-1.15654	-0.590622	-1.25511	-0.0475523	21
n283832:4425299	NONMMUT002013	0	-0.720353	-0.294349	-0.563538	-0.329115	21
n297204:4692907	NONMMUT022692	0	-0.455057	-0.17436	-0.723756	-0.0954649	21
n278120:4721493	NONMMUT028368	0	-1.03952	-0.384222	-0.646254	-0.224222	21
n283992:4712584	NONMMUT029331	0	-0.48272	0.0593273	-0.786675	-0.114723	21
n283343:4525282	NONMMUT029688	0	-0.725579	-0.283971	-0.663659	-0.390156	21
n279644:4690549	NONMMUT031504	0	-0.904348	-0.287939	-1.13958	-0.0425862	21
n286350:5527159	NONMMUT032459	0	-0.732968	-0.361184	-0.81246	-0.0702369	21
n286350:4484926	NONMMUT032459	0	-0.872377	-0.221639	-0.565867	-0.221251	21
n277543:5134306	NONMMUT033713	0	-0.632578	-0.128531	-0.802219	-0.0566192	21
n269583:5094557	NONMMUT034186	0	-0.724294	-0.288471	-0.81348	-0.0957874	21
n287473:4835981	NONMMUT051622	0	-0.507776	0.134196	-0.610819	-0.0490126	21
n272320:4804386	NONMMUT055173	0	-0.87234	-0.423321	-0.650602	-0.220911	21
n275849:5398250	NONMMUT056400	0	-0.494205	0.0144932	-0.885606	-0.0279618	21
n270852:4388334	NONMMUT059457	0	-0.51448	-0.210614	-0.7202	-0.245547	21
n293561:4777883	NONMMUT073185	0	-1.29714	-0.475363	-1.34368	-0.517271	21
n269880:4885565	NONMMUT001375	0	-1.00625	-0.547116	-0.485283	-0.975662	22
n286657:4559715	NONMMUT003243	0	-1.01155	-0.417752	-0.230541	-0.620011	22
ENSMUST00000124424:5355286	ENSMUST00000124424	0	-1.13342	-0.238271	-0.28611	-0.0426059	23
ENSMUST00000132675:5592036	ENSMUST00000132675	0	-1.1611	-0.619207	-0.611379	-0.362357	23
ENSMUST00000134138:5542956	ENSMUST00000134138	0	-0.738935	-0.304781	-0.188857	0.0341143	23
ENSMUST00000142296:5320777	ENSMUST00000142296	0	-1.04199	-0.274336	-0.25317	-0.269782	23
ENSMUST00000144683:5112339	ENSMUST00000144683	0	-1.18752	-0.367257	-0.25347	0.105281	23
ENSMUST00000155183:5129151	ENSMUST00000155183	0	-0.891365	-0.214695	-0.231547	-0.248779	23
ENSMUST00000166352:4646508	ENSMUST00000166352	0	-0.879261	-0.188875	-0.34763	-0.0432194	23
ENSMUST00000169569:5166062	ENSMUST00000169569	0	-1.33964	-0.521799	-0.621463	-0.206758	23
ENSMUST00000172382:4989376	ENSMUST00000172382	0	-1.02143	-0.498058	-0.457901	-0.208168	23
ENSMUST00000180969:4761568	ENSMUST00000180969	0	-0.828581	-0.331712	-0.232936	0.0227996	23
n279429:4768303	NONMMUT002379	0	-1.18845	-0.432136	-0.528101	-0.677849	23
n414458:5436492	NONMMUT007463	0	-0.985512	-0.206182	-0.389068	-0.212689	23
n269589:4998820	NONMMUT009083	0	-0.922634	-0.527797	-0.425994	-0.38753	23
n278195:4442351	NONMMUT012622	0	-0.78953	-0.045049	-0.331694	-0.0976414	23
n284939:4721083	NONMMUT015664	0	-1.09973	-0.35184	-0.115162	0.125212	23
n283957:4563872	NONMMUT016544	0	-0.876021	-0.402761	-0.207942	-0.190725	23
n286863:4700377	NONMMUT017172	0	-1.09146	-0.21043	-0.266054	0.152436	23
n268509:5519547	NONMMUT017354	0	-1.12135	-0.224046	-0.295086	0.154022	23
n286846:5413436	NONMMUT022078	0	-1.0749	-0.293899	-0.464383	-0.0573473	23
n274999:4671897	NONMMUT022962	0	-1.10194	-0.387901	-0.190966	-0.0776192	23
n270648:4742541	NONMMUT023039	0	-1.07204	-0.228393	-0.29456	0.101449	23
n289229:5302022	NONMMUT031982	0	-0.817985	-0.409917	-0.300685	-0.131297	23
n266668:5597300	NONMMUT036068	0	-1.08764	-0.27941	-0.571251	-0.265157	23
n273418:5049618	NONMMUT043658	0	-1.54466	-0.329277	-0.507185	-0.171322	23
n265524:4398480	NONMMUT047734	0	-0.990797	-0.358482	-0.312305	-0.0100893	23
n288274:4675501	NONMMUT048447	0	-0.926716	-0.463815	-0.533144	-0.339372	23
n279626:4395706	NONMMUT055125	0	-0.760031	-0.0801367	-0.140217	-0.314298	23
n283806:4705778	NONMMUT055316	0	-1.22977	-0.466736	-0.318603	-0.143662	23
n274889:4773102	NONMMUT068718	0	-1.43748	-0.757376	-0.758391	-0.423975	23
ENSMUST00000128937:5190085	ENSMUST00000128937	0	-0.700992	-0.309316	-0.323031	0.0307351	24
ENSMUST00000144727:5495041	ENSMUST00000144727	0	-0.488032	-0.171602	-0.180882	0.212201	24
n421307:5227529	n421307	0	-0.610951	0.00789746	-0.0587013	0.591442	24
n415365:4819918	NONMMUT028645	0	-0.553811	-0.247949	0	0.696539	24
n289652:4977167	NONMMUT049233	0	-0.824526	-0.300109	-0.404816	0.0307874	24
n271994:5206563	NONMMUT057723	0	-0.717373	-0.363745	-0.28984	0.0458397	24
ENSMUST00000129526:5493808	ENSMUST00000129526	0	-0.711392	-0.0166683	0.926557	0.704464	26
ENSMUST00000164888:4766162	ENSMUST00000164888	0	-0.801253	-0.0736295	0.491689	0.732083	26
n267363:4787829	NONMMUT002944	0	-0.608863	-0.0635043	0.72775	0.661547	26
n266089:5196731	NONMMUT003003	0	-0.893534	0.513044	0.7241	1.02499	26
n283689:5186276	NONMMUT025983	0	-0.564732	0.348038	0.522407	0.730355	26
n287677:5232821	NONMMUT031096	0	-0.413864	0.0888752	0.496332	0.646018	26
n273720:4490477	NONMMUT034096	0	-0.371381	0.19877	1.05343	0.835621	26
n278740:4516115	NONMMUT038255	0	-0.286782	0.174398	0.745003	0.78532	26
n277916:4477839	NONMMUT067813	0	-0.636953	0.0845939	0.705644	0.856055	26
ENSMUST00000127842:5156716	ENSMUST00000127842	0	-0.381516	0.00891478	0.292668	0.789073	27
ENSMUST00000136187:4529956	ENSMUST00000136187	0	-0.752769	-0.382529	0.603112	1.50605	27
n266089:5564783	NONMMUT003003	0	-0.434411	0.0832664	0.435193	0.710078	27
n289378:5130350	NONMMUT021460	0	-0.172139	-0.0116971	0.345484	0.6048	27
n289912:4927125	NONMMUT047944	0	-0.275596	0.181984	0.732281	1.06381	27
n285318:5058627	NONMMUT058255	0	-0.535631	-0.136535	0.168364	1.0044	27
ENSMUST00000127358:4308838	ENSMUST00000127358	0	0.0520693	-0.318894	-0.554521	-0.580811	29
ENSMUST00000139975:5119572	ENSMUST00000139975	0	-0.107173	-0.338006	-0.765375	-0.159478	30
ENSMUST00000143161:4416668	ENSMUST00000143161	0	0.0556489	-0.563429	-1.12745	-0.193626	30
ENSMUST00000155361:4762731	ENSMUST00000155361	0	-0.0195436	-0.332574	-0.761463	-0.223123	30
ENSMUST00000155361:5339629	ENSMUST00000155361	0	-0.131665	-0.223295	-0.731368	-0.327829	30
n276210:4537098	n276210	0	-0.100158	-0.204913	-0.583374	-0.246324	30
n276210:5476181	n276210	0	-0.0374006	-0.177128	-0.383526	-0.151107	30
n414332:4767027	n414332	0	-0.0476455	-0.164048	-0.337915	-0.109131	30
n418068:4405839	n418068	0	0.00567252	-0.362072	-0.535017	-0.26995	30
n278835:4852123	NONMMUT002429	0	-0.13196	-0.409273	-0.941484	-0.238003	30
n277671:4651090	NONMMUT009847	0	-0.109364	-0.269402	-0.493069	-0.156828	30
n412832:4902715	NONMMUT015703	0	-0.133106	-0.272813	-0.65322	-0.301832	30
n289318:5545770	NONMMUT017496	0	-0.101562	-0.482541	-0.655804	-0.25316	30
n284412:5580243	NONMMUT019004	0	-0.0421765	-0.260559	-0.586933	-0.126937	30
n275810:5194297	NONMMUT019471	0	0.0806907	-0.415418	-0.72948	-0.406036	30
n269592:5508521	NONMMUT020400	0	0.218624	-0.52802	-1.11966	-0.115006	30
n278831:5352453	NONMMUT020404	0	-0.0420529	-0.288345	-0.66935	-0.20689	30
n275569:4546865	NONMMUT022695	0	-0.00841145	-0.406313	-0.948529	-0.383697	30
n268259:5110423	NONMMUT027268	0	-0.308628	-0.810789	-1.4011	-0.518171	30
n273348:4779376	NONMMUT032142	0	-0.0718111	-0.356771	-0.616393	-0.125751	30
n275518:4711610	NONMMUT032971	0	-0.304305	-0.414244	-1.48624	-0.852381	30
n291099:5409101	NONMMUT033050	0	-0.0123897	-0.317343	-0.949343	-0.278276	30
n285838:5469602	NONMMUT037585	0	-0.1837	-0.36445	-0.954583	-0.635934	30
n283133:4430788	NONMMUT043903	0	-0.0768003	-0.499886	-0.942611	-0.280392	30
n271812:4350076	NONMMUT054030	0	-0.0894297	-0.29173	-0.577623	-0.316803	30
n267366:5075378	NONMMUT055621	0	-0.131933	-0.403826	-0.739361	-0.366213	30
n270809:5050575	NONMMUT057235	0	-0.0758332	-0.629883	-0.977394	-0.405963	30
n275818:5424389	NONMMUT062609	0	-0.0913046	-0.203625	-0.562792	-0.235075	30
n422337:5462914	NONMMUT067432	0	-0.0553837	-0.232424	-0.49333	-0.136961	30
n277335:5276457	NONMMUT068540	0	-0.0928423	-0.429987	-0.629556	-0.368469	30
n269144:5354327	NONMMUT069566	0	-0.111524	-0.281946	-0.552282	-0.203669	30
n277660:5491993	NONMMUT070964	0	-0.111271	-0.264012	-0.791698	-0.312647	30
n281289:4537585	NONMMUT072610	0	-0.124387	-0.147832	-0.561116	-0.339913	30
n281289:4964861	NONMMUT072610	0	-0.0409603	-0.153577	-0.500585	-0.279135	30
n275412:5117752	NONMMUT072612	0	-0.138758	-0.195327	-0.772512	-0.329118	30
n274087:5595840	NONMMUT032970	0	-0.22527	-1.17877	-0.719661	-0.961778	32
n274855:4935893	NONMMUT038925	0	-0.238701	-1.34358	-0.835608	-0.788013	32
n288319:4525686	NONMMUT046717	0	-0.141126	-1.03359	-1.18912	-0.834758	32
ENSMUST00000124738:4983758	ENSMUST00000124738	0	-0.218254	-0.594962	-0.882965	-0.195048	33
ENSMUST00000127376:5205627	ENSMUST00000127376	0	-0.15198	-0.475977	-0.719638	-0.0996764	33
ENSMUST00000135943:5475238	ENSMUST00000135943	0	-0.152602	-0.724538	-1.16491	0.03115	33
ENSMUST00000137815:4910195	ENSMUST00000137815	0	-0.200605	-0.604605	-0.866029	-0.201375	33
ENSMUST00000142768:4835872	ENSMUST00000142768	0	-0.266673	-0.806833	-0.732499	-0.14693	33
ENSMUST00000149117:4636027	ENSMUST00000149117	0	-0.342286	-0.906336	-0.805654	0.0243875	33
n269452:5451086	n269452	0	-0.171205	-0.570675	-0.909291	-0.150436	33
n344237:4801708	n344237	0	-0.147895	-0.489323	-0.53748	-0.115508	33
n280271:4641824	NONMMUT000206	0	0.000781166	-0.494447	-0.753285	0.0280209	33
n286449:4335558	NONMMUT005779	0	-0.204911	-0.634844	-1.00381	-0.134495	33
n413462:5173379	NONMMUT006509	0	-0.102406	-0.363149	-0.722403	0.00484118	33
n268864:4388729	NONMMUT008321	0	-0.00810535	-0.991445	-0.596503	-0.00543459	33
n273557:4827495	NONMMUT015768	0	-0.132662	-0.399624	-0.605289	-0.134509	33
n279372:5205406	NONMMUT034181	0	-0.30543	-1.13924	-0.94963	-0.174098	33
n282622:4625049	NONMMUT040164	0	-0.350547	-0.989063	-1.07336	0.0804287	33
n283133:5422670	NONMMUT043903	0	-0.221634	-1.26421	-1.01524	-0.16729	33
n276663:4589084	NONMMUT057512	0	-0.322951	-0.994352	-1.05435	-0.211689	33
n273595:5395403	NONMMUT062718	0	-0.175086	-0.396567	-0.669483	-0.0403854	33
n281422:4312226	NONMMUT065909	0	-0.206217	-0.674334	-0.857121	-0.0743091	33
n282817:4694003	NONMMUT066749	0	-0.274467	-0.55346	-0.723707	0.0904533	33
n274342:4755633	NONMMUT067118	0	-0.144098	-0.54008	-0.826672	-0.162384	33
n289190:4576533	NONMMUT067764	0	-0.335266	-0.667933	-1.27474	-0.0363609	33
n274522:4692614	NONMMUT068321	0	-0.160514	-0.797147	-0.545569	-0.179702	33
n297103:4962867	NONMMUT070015	0	-0.125048	-0.709896	-1.15406	-0.238333	33
n288975:5078563	NONMMUT071050	0	-0.127747	-0.986574	-0.809634	-0.318183	33
n266130:5549985	NONMMUT071149	0	-0.115793	-0.667095	-0.970546	-0.147828	33
n282477:4600846	NONMMUT074554	0	-0.137273	-0.352677	-0.476483	-0.0734629	33
n282477:4636058	NONMMUT074554	0	-0.24658	-0.587659	-1.11978	-0.130234	33
ENSMUST00000142649:4831060	ENSMUST00000142649	0	-0.218789	-1.08407	0.0263507	0.244421	35
ENSMUST00000144349:5144813	ENSMUST00000144349	0	-0.0139225	-0.634413	-0.0967207	-0.0816878	35
ENSMUST00000147635:4656613	ENSMUST00000147635	0	-0.194854	-0.792182	-0.020856	0.0903913	35
ENSMUST00000152477:4882353	ENSMUST00000152477	0	-0.146457	-0.874426	-0.22233	-0.113683	35
n272465:5338789	NONMMUT003979	0	-0.33658	-0.962901	-0.207404	-0.145828	35
n267893:5589549	NONMMUT008164	0	-0.203356	-0.903981	-0.152332	0.0665993	35
n287134:4955247	NONMMUT012540	0	-0.0548097	-1.17485	-0.372764	-0.345749	35
n277248:4512748	NONMMUT014333	0	-0.215361	-0.909826	-0.312564	-0.202956	35
n270961:5231410	NONMMUT030315	0	-0.169399	-1.07031	-0.477329	-0.201335	35
n274855:5404569	NONMMUT038925	0	-0.0690181	-1.66798	-0.510065	-0.462383	35
n274207:5468956	NONMMUT068881	0	-0.158211	-1.01216	-0.396277	-0.0522085	35
n289952:4787319	NONMMUT027398	0	-0.263134	-0.949823	-0.149158	0.722083	36
n286841:4504945	NONMMUT044320	0	-0.164714	-0.131739	-0.963143	-0.601763	38
ENSMUST00000118407:5550881	ENSMUST00000118407	0	-0.407814	-0.339274	-1.03505	-0.109465	39
ENSMUST00000126631:4484841	ENSMUST00000126631	0	-0.44924	-0.559665	-1.42312	-0.0182149	39
ENSMUST00000129840:4841406	ENSMUST00000129840	0	-0.149471	-0.142754	-0.740323	-0.191823	39
ENSMUST00000131047:4672410	ENSMUST00000131047	0	-0.0991749	-0.358905	-0.790137	0.0460093	39
ENSMUST00000131529:5152210	ENSMUST00000131529	0	-0.134304	0.0339125	-0.862889	0.165234	39
ENSMUST00000131603:5471579	ENSMUST00000131603	0	-0.106314	-0.102956	-1.09203	-0.227666	39
ENSMUST00000132050:4370336	ENSMUST00000132050	0	-0.190621	-0.0792427	-0.632824	0.0580544	39
ENSMUST00000133312:4643294	ENSMUST00000133312	0	-0.0652454	-0.193691	-0.823223	-0.0757502	39
ENSMUST00000140130:5596476	ENSMUST00000140130	0	-0.168555	-0.204325	-0.797254	-0.114471	39
ENSMUST00000147107:5238812	ENSMUST00000147107	0	-0.391499	-0.317797	-1.37439	0.160462	39
ENSMUST00000148054:4997511	ENSMUST00000148054	0	-0.234502	-0.182947	-0.700541	-0.0677541	39
ENSMUST00000150238:5468908	ENSMUST00000150238	0	0.045251	-0.125824	-0.966601	-0.286957	39
ENSMUST00000160737:5556439	ENSMUST00000160737	0	-0.120199	-0.124468	-0.567586	-0.137817	39
ENSMUST00000161704:4808001	ENSMUST00000161704	0	-0.0244096	0.168763	-1.18005	-0.182938	39
ENSMUST00000166800:4898166	ENSMUST00000166800	0	-0.12155	-0.460624	-0.976181	-0.11189	39
ENSMUST00000174136:5087029	ENSMUST00000174136	0	-0.370894	-0.194052	-0.957141	-0.1101	39
n417932:4963918	n417932	0	-0.201531	-0.369625	-1.13994	-0.138879	39
n272008:5499685	NONMMUT000842	0	-0.218586	-0.502091	-1.69375	-0.367374	39
n290562:5502750	NONMMUT001961	0	-0.151797	0.0425903	-1.00178	-0.35711	39
n266841:4370310	NONMMUT005989	0	-0.350131	-0.252418	-1.12002	-0.230715	39
n285976:4619646	NONMMUT006789	0	0.0865249	0.173275	-0.692328	-0.219266	39
n283327:4732182	NONMMUT009364	0	-0.0548895	-0.108711	-0.947826	-0.0111253	39
n277319:4980019	NONMMUT011340	0	-0.189261	-0.473702	-1.01496	-0.000550171	39
n283028:4926071	NONMMUT012263	0	-0.297908	-0.281068	-0.784687	0.0132683	39
n289397:5456003	NONMMUT014203	0	-0.306426	-0.479934	-1.39294	-0.254044	39
n288936:4803283	NONMMUT014375	0	-0.155183	-0.368047	-1.1351	-0.210928	39
n292781:4333807	NONMMUT017099	0	-0.148532	-0.118396	-0.851391	-0.214364	39
n283305:5031043	NONMMUT021927	0	0.0346155	-0.092391	-1.07165	-0.142981	39
n272507:4681584	NONMMUT022094	0	-0.434642	-0.292597	-1.13291	-0.219086	39
n269509:4485506	NONMMUT023830	0	-0.192158	-0.122301	-1.11461	0.143758	39
n266088:4623161	NONMMUT023968	0	-0.016847	-0.202404	-1.20619	-0.0914671	39
n286067:5517879	NONMMUT034288	0	-0.268872	-0.221499	-1.30804	-0.0517529	39
n269715:4615457	NONMMUT034296	0	-0.248602	-0.242201	-1.09028	-0.245045	39
n276144:5391691	NONMMUT036703	0	-0.209729	-0.398162	-1.24006	-0.286599	39
n275102:4803842	NONMMUT037074	0	-0.304151	-0.160387	-1.28196	-0.109777	39
n281564:4325879	NONMMUT037208	0	-0.00607565	-0.154319	-0.62675	-0.10875	39
n268415:4696526	NONMMUT042285	0	-0.447243	-0.355293	-1.52774	-0.239019	39
n269564:5335136	NONMMUT044964	0	-0.25834	-0.353183	-1.09081	-0.149858	39
n271967:5416675	NONMMUT045271	0	-0.204042	-0.110961	-0.547051	-0.0549093	39
n265094:4688674	NONMMUT048370	0	-0.130166	-0.37334	-1.27155	-0.300776	39
n268068:4551654	NONMMUT053544	0	0.106025	-0.00175334	-0.661801	-0.181697	39
n421213:4320294	NONMMUT055497	0	-0.16417	-0.262908	-0.904692	-0.231155	39
n269640:4776204	NONMMUT055906	0	-0.0541722	-0.171704	-0.958203	-0.271106	39
n284608:5038704	NONMMUT056428	0	-0.174156	-0.408505	-1.05358	-0.191552	39
n274748:5152548	NONMMUT056556	0	-0.322594	-0.298345	-1.10833	-0.201711	39
n275392:5259745	NONMMUT056557	0	-0.0608618	-0.199407	-0.935224	-0.317298	39
n288130:4880598	NONMMUT056559	0	-0.41168	-0.210611	-1.67144	-0.338901	39
n271071:4995196	NONMMUT057488	0	-0.0492801	-0.214465	-0.77001	-0.131424	39
n294417:4553830	NONMMUT058116	0	-0.187041	-0.171365	-0.831914	-0.107217	39
n273570:5605391	NONMMUT059651	0	-0.233802	-0.159403	-0.778482	-0.220431	39
n278414:4877797	NONMMUT059979	0	-0.128146	-0.128146	-1.1139	0.0918089	39
n276397:5044851	NONMMUT063110	0	-0.248407	-0.108026	-1.16527	-0.560771	39
n297103:5526359	NONMMUT070015	0	-0.219272	-0.228425	-0.844415	-0.126992	39
ENSMUST00000148691:4935740	ENSMUST00000148691	0	0.153633	-0.228331	-0.385243	0.990748	41
ENSMUST00000156760:4927261	ENSMUST00000156760	0	0.163262	0.373803	0.0771301	0.877099	41
n266717:5184685	n266717	0	-0.155432	0.0455116	0.106479	0.942524	41
n286655:5195416	NONMMUT017972	0	-0.161164	-0.00785716	0.00854826	1.02213	41
n276317:5023542	NONMMUT024839	0	0.117307	0.132133	0.141387	0.710203	41
n274602:5243414	NONMMUT034179	0	-0.402398	-0.349836	-0.22525	1.07824	41
n277422:5540452	NONMMUT034180	0	-0.12493	-0.19266	-0.170871	0.802758	41
n280474:5426912	NONMMUT042115	0	0.154565	0.0621828	0.0486394	0.607596	41
n281765:5334477	NONMMUT049629	0	-0.259864	-0.521117	-0.133113	0.969412	41
n270796:4482184	NONMMUT054341	0	-0.0367618	0.102311	-0.0609661	0.715023	41
n290654:4705381	NONMMUT055533	0	-0.185776	0.0934355	0.174523	1.44533	41
n284073:4779379	NONMMUT069907	0	0.190764	0.136994	0.115484	1.07501	41
n279787:4794275	NONMMUT070406	0	-0.164313	0.144163	0.203261	1.12075	41
n269725:4796180	NONMMUT072578	0	0.204093	0.241109	-0.107414	0.965854	41
ENSMUST00000130419:4817916	ENSMUST00000130419	0	0.0359027	0.103294	0.87808	0.330692	42
ENSMUST00000150868:5538330	ENSMUST00000150868	0	-0.288679	0.0844838	0.979679	0.0669654	42
ENSMUST00000152866:4632554	ENSMUST00000152866	0	0.129945	0.0617858	1.32064	0.150088	42
n266670:5438004	NONMMUT004977	0	0.108915	-0.0912186	0.943477	-0.018509	42
n265849:5318301	NONMMUT026724	0	0.105677	0.316943	0.984542	0.186289	42
n268443:4475064	NONMMUT032370	0	0.136299	0.118977	0.884717	-0.0316378	42
n281813:4387856	NONMMUT040061	0	0.131344	0.384702	0.991391	0.113784	42
n297406:5534650	NONMMUT042155	0	0.132472	0.119032	0.877741	-0.0606385	42
n273517:4432829	NONMMUT044460	0	0.460789	0.27076	1.12345	0.182199	42
n275245:5469644	NONMMUT054214	0	0.230597	0.221234	0.807023	0.138565	42
n285269:5166395	NONMMUT069561	0	-0.0053238	0.00368556	0.733719	0.174818	42
ENSMUST00000131174:4560675	ENSMUST00000131174	0	-0.11576	0.0843293	0.540361	0.632804	43
ENSMUST00000132029:4587106	ENSMUST00000132029	0	-0.0921443	-0.320241	1.07869	0.911256	43
ENSMUST00000135968:5037415	ENSMUST00000135968	0	0.161978	0.304769	1.01221	1.15757	43
ENSMUST00000139201:4635774	ENSMUST00000139201	0	0.285352	0.258734	1.24715	1.0305	43
ENSMUST00000139492:5285939	ENSMUST00000139492	0	-0.0549374	0.174793	1.26191	1.23839	43
ENSMUST00000148593:5496380	ENSMUST00000148593	0	-0.231234	-0.376634	1.28287	0.866634	43
ENSMUST00000155687:5493896	ENSMUST00000155687	0	-0.296026	-0.311493	1.33209	1.19395	43
n266174:4636503	NONMMUT000801	0	0.306023	0.132993	1.1092	1.16092	43
n289827:4391195	NONMMUT000803	0	0.00902391	0.0950062	1.78796	1.28213	43
n289827:5489764	NONMMUT000803	0	0.14925	0.132299	1.57857	1.30109	43
n272030:5588738	NONMMUT026803	0	0.383846	0.0127976	1.09668	1.23567	43
n271638:5294470	NONMMUT027018	0	-0.188651	0.0955582	1.01772	0.882308	43
n271031:5538769	NONMMUT028255	0	-0.0507784	0.200875	0.847685	0.950086	43
n271153:5042378	NONMMUT043086	0	-0.431338	-0.177765	1.03301	0.565048	43
n271153:5070657	NONMMUT043086	0	-0.0925079	0.0540367	1.77363	1.17895	43
n293437:4740803	NONMMUT046367	0	0.227881	0.00284368	1.0156	0.956766	43
n293635:4835356	NONMMUT057251	0	0.086164	0.170979	0.838503	0.822306	43
n288428:4401751	NONMMUT064495	0	-0.175928	-0.0450905	0.536279	0.703568	43
ENSMUST00000134961:5185417	ENSMUST00000134961	0	-0.0732353	-0.318245	0.331086	1.0466	44
n279101:5236841	NONMMUT003203	0	-0.069093	-0.0248244	0.712443	1.25561	44
n294502:4463409	NONMMUT004483	0	-0.0195131	0.0391063	0.275415	0.825412	44
n291761:4351804	NONMMUT022537	0	-0.159879	-0.153485	0.350255	1.19605	44
n281275:4560407	NONMMUT026672	0	0	-0.367402	0.546817	1.20243	44
n275377:5118899	NONMMUT048762	0	0.114007	-0.185519	0.693864	1.48587	44
n280425:4458382	NONMMUT054375	0	-0.080425	-0.207692	0.1954	0.809972	44
n286822:5427865	NONMMUT058178	0	-0.108529	-0.0406883	0.362711	0.649514	44
n287981:5030296	NONMMUT068653	0	0.183429	0.0733514	0.286371	0.787693	44
n296911:4484596	NONMMUT010008	0	0.0497403	0.401221	0.0972252	-0.225685	45
ENSMUST00000121125:4884184	ENSMUST00000121125	0	0.114272	1.03679	-0.073033	-0.283273	46
ENSMUST00000124479:4834974	ENSMUST00000124479	0	0.273366	0.916418	0.135607	0.326359	46
ENSMUST00000127007:4424074	ENSMUST00000127007	0	0.103943	1.08137	0.10278	0.0648091	46
ENSMUST00000151079:5003927	ENSMUST00000151079	0	0.437492	1.00097	0.150346	0.109974	46
ENSMUST00000155626:5202101	ENSMUST00000155626	0	-0.0701536	1.39162	0.330996	-0.312394	46
n276333:5581904	NONMMUT004965	0	0.190998	1.09114	0.210633	-0.0373728	46
n264000:5206011	NONMMUT024966	0	0.3152	1.00144	0.153982	0.096703	46
ENSMUST00000121120:4667585	ENSMUST00000121120	0	-0.0543771	1.10355	0.960565	0.484813	48
ENSMUST00000124977:5146283	ENSMUST00000124977	0	0.0666435	0.525786	0.646187	0.000500072	48
ENSMUST00000128828:5363752	ENSMUST00000128828	0	-0.0520818	0.642907	1.21897	-0.150625	48
ENSMUST00000133230:5256359	ENSMUST00000133230	0	0.365939	0.586812	0.917378	0.0419299	48
ENSMUST00000139460:5334905	ENSMUST00000139460	0	0.0805287	0.681809	0.833411	0.135124	48
ENSMUST00000149991:4311069	ENSMUST00000149991	0	0.193143	0.510054	0.842453	0.156008	48
n296470:4423776	NONMMUT002122	0	0.162364	1.00198	1.03006	-0.309835	48
n280835:4823653	NONMMUT018968	0	0.173946	0.338491	0.701203	-0.0752123	48
n277848:5144490	NONMMUT020559	0	0.427116	0.80131	1.05246	0.0346964	48
n285209:5206702	NONMMUT027610	0	0.326654	0.73389	0.834578	0.0418554	48
n280727:4390946	NONMMUT032255	0	-0.0434125	0.723274	1.3866	0.0742271	48
n269487:4831380	NONMMUT047797	0	0.321273	0.690464	1.21892	-0.0477118	48
n289673:4366076	NONMMUT067134	0	-0.227289	0.55549	0.791483	0.156245	48
n287554:5452959	NONMMUT067884	0	0.21428	0.407903	0.844167	-0.171073	48
ENSMUST00000131400:4336817	ENSMUST00000131400	0	-0.440342	0.895356	1.10321	0.887069	49
ENSMUST00000133047:5465289	ENSMUST00000133047	0	-0.362118	0.799914	0.587122	0.792804	49
ENSMUST00000154339:5599096	ENSMUST00000154339	0	-0.00428089	0.713662	0.353767	0.394868	49
n288087:4367646	NONMMUT009486	0	-0.186129	0.416867	0.632336	0.496419	49
n273378:5301409	NONMMUT026201	0	-0.199239	0.868122	0.823582	1.066	49
n273378:5326131	NONMMUT026201	0	-0.383646	0.381002	0.38851	0.480904	49
n287022:5302894	NONMMUT027743	0	-0.226431	0.481455	0.573235	0.280346	49
n293670:4794271	NONMMUT046591	0	0.177199	1.17181	1.33184	1.04554	49
ENSMUST00000156456:5286986	ENSMUST00000156456	0	-0.0118893	0.235221	0.248018	0.437643	50
n267144:4589194	NONMMUT002943	0	-0.317461	0.491645	0.447993	0.788885	50
n267363:4724279	NONMMUT002944	0	0.18956	0.755164	0.46625	1.25654	50
n271871:4759721	NONMMUT022376	0	0.0703746	0.388217	0.330673	0.990404	50
n266763:4407808	NONMMUT042946	0	-0.171147	0.245521	0.058193	0.793782	50
ENSMUST00000127551:4382108	ENSMUST00000127551	0	0.0971251	0.465629	0.90707	0.392239	51
ENSMUST00000169740:5325055	ENSMUST00000169740	0	-0.159956	0.309469	0.618323	0.217117	51
n280030:5390018	NONMMUT000334	0	0.0124933	0.215894	0.878834	0.264501	51
n288759:4734675	NONMMUT000809	0	0.0409139	0.208539	1.22107	0.495869	51
n267144:4578311	NONMMUT002943	0	-0.0165272	0.378254	0.998691	0.620699	51
n287065:4637068	NONMMUT003914	0	0.0777549	0.378235	0.588148	0.330976	51
n266317:5426006	NONMMUT014029	0	0.184175	0.258587	1.40686	0.610642	51
n285650:5038808	NONMMUT034407	0	-0.29198	0.444067	0.84559	0.0760891	51
n271153:5543297	NONMMUT043086	0	0.165651	0.521412	1.37036	0.801378	51
n289475:5201032	NONMMUT054727	0	-0.00666942	0.489122	1.11516	0.275065	51
n289710:4423468	NONMMUT060480	0	0.12435	0.263178	0.767449	0.392877	51
n295691:5176438	NONMMUT063473	0	-0.0976304	0.682593	1.27401	0.388913	51
n293766:4350026	NONMMUT070157	0	0.175327	0.449709	1.11476	0.653102	51
n294811:4544341	NONMMUT070331	0	0.162189	0.493309	0.827777	0.376775	51
ENSMUST00000156107:4312296	ENSMUST00000156107	0	-0.0454359	0.439677	0.894362	1.06897	52
ENSMUST00000181224:4537638	ENSMUST00000181224	0	0.0301993	0.379321	0.702189	0.688561	52
n284605:4397110	n284605	0	0.0635	0.49439	0.691886	0.700419	52
n266089:4506254	NONMMUT003003	0	-0.286197	0.797943	1.18621	1.30088	52
n283446:4778681	NONMMUT007331	0	-0.0911884	0.373585	0.938559	0.674884	52
n270499:5187329	NONMMUT014805	0	-0.101066	0.394114	0.623717	0.767927	52
n271273:4865941	NONMMUT047279	0	0.0906951	0.386657	0.987199	0.827222	52
n268730:4971205	NONMMUT054792	0	0.0723688	0.372317	1.38677	1.163	52
n273194:4426922	NONMMUT060994	0	-0.0040278	0.246769	0.631543	0.480383	52
ENSMUST00000123962:5034160	ENSMUST00000123962	0	0.0401049	0.416211	0.580047	0.855182	53
ENSMUST00000151023:5111197	ENSMUST00000151023	0	-0.0865449	0.0994577	0.415632	0.674694	53
ENSMUST00000151061:4627163	ENSMUST00000151061	0	-0.169199	0.370462	0.703422	1.00776	53
n270523:4760191	NONMMUT027379	0	-0.149254	0.146089	0.542056	0.7692	53
n265014:5009809	NONMMUT048761	0	-0.274393	0.293568	0.680604	1.29364	53
n290018:5439318	NONMMUT052099	0	-0.00494456	0.173753	0.508408	0.722997	53
n272096:4689562	NONMMUT055527	0	-0.0667401	0.164672	0.402965	0.912628	53
n264932:5481896	NONMMUT056327	0	0.1307	0.227226	0.56995	0.752421	53
n265135:4816723	NONMMUT010867	0	0.843319	0.252698	0.326767	-0.0914797	57
n288104:5240946	NONMMUT037070	0	1.06696	0.128043	0.0524169	-0.609491	57
n279998:5459126	NONMMUT042385	0	0.876808	0.3221	0.59157	-0.242507	57
n281612:4424196	n281612	0	1.13469	0.589141	0.484	0.255719	58
n294614:5532971	n294614	0	0.755108	0.0921852	0.157704	0.201323	58
n268810:4922883	NONMMUT028345	0	0.731143	0.287619	0.127737	0.189026	58
n289320:5411497	NONMMUT028346	0	0.717091	0.261301	0.0812502	0.105778	58
n267060:5159512	NONMMUT028725	0	1.40561	0.374253	0.217672	0.652088	58
n293001:5084937	NONMMUT041757	0	1.05747	-0.00150742	0.163833	0.0795709	58
n279383:5564131	NONMMUT057880	0	0.890808	0.380994	0.28967	0.368041	58
n296741:4338274	NONMMUT063489	0	1.19009	0.573133	0.265915	0.124959	58
ENSMUST00000118647:5515776	ENSMUST00000118647	0	0.489912	0.14286	0.77255	0.227908	60
ENSMUST00000120761:4632765	ENSMUST00000120761	0	0.77779	0.372134	1.11229	0.259097	60
ENSMUST00000130340:5486531	ENSMUST00000130340	0	0.832728	0.308398	0.5564	0.311768	60
ENSMUST00000142448:4707290	ENSMUST00000142448	0	1.1626	0.148246	0.817882	-0.152309	60
ENSMUST00000160970:4635881	ENSMUST00000160970	0	0.726327	0.246955	0.911612	-0.287591	60
n284040:5187411	n284040	0	1.27969	0.341111	0.647888	-0.0360971	60
n288380:5412181	n288380	0	0.755827	0.435015	1.04769	0.16833	60
n273015:4978938	NONMMUT004764	0	0.885099	0.281976	0.9537	-0.209325	60
n278994:5421033	NONMMUT007249	0	0.710271	0.279976	1.03048	0.240131	60
n292194:5292435	NONMMUT029800	0	1.18298	0.171085	0.98966	0.214566	60
n296883:4906674	NONMMUT035791	0	0.526238	-0.123934	1.00789	0.128875	60
n273149:5262306	NONMMUT044377	0	0.913863	0.329728	1.01448	0.0420615	60
n264947:4855371	NONMMUT070566	0	1.01694	0.280826	0.991904	0.120159	60
n284806:5584299	NONMMUT071759	0	1.23485	0.731134	1.36387	0.418403	60
ENSMUST00000159935:5338869	ENSMUST00000159935	0	0.376979	0.0480504	0.690098	0.411427	61
ENSMUST00000162949:4346887	ENSMUST00000162949	0	0.569164	0.201517	0.865954	0.586069	61
ENSMUST00000172978:5439597	ENSMUST00000172978	0	0.826658	0.342233	0.876899	0.990497	61
n280291:4479393	NONMMUT040170	0	0.89315	0.158893	1.03028	0.529071	61
n267939:4354448	NONMMUT043742	0	0.835808	0.404878	0.970122	0.692093	61
n267678:4576112	NONMMUT016503	0	0.653119	0.232777	0.734276	1.00793	62
ENSMUST00000142991:5369932	ENSMUST00000142991	0	0.750578	0.663927	0.26467	-0.308958	63
n272009:4854360	n272009	0	0.752304	0.634055	0.324237	-0.0893545	63
n274682:5346844	NONMMUT007398	0	0.888271	0.747155	0.305465	-0.242393	63
n289958:4447346	NONMMUT073052	0	0.904661	0.938477	0.327539	-0.225579	63
ENSMUST00000137410:4468768	ENSMUST00000137410	0	0.836998	0.745927	-0.296701	0.0373345	64
ENSMUST00000137410:5096953	ENSMUST00000137410	0	0.910169	1.16917	0.249025	0.0348488	64
ENSMUST00000146758:4325666	ENSMUST00000146758	0	0.408148	0.540621	0.151783	0.144596	64
ENSMUST00000174209:4329995	ENSMUST00000174209	0	1.35073	1.12879	0.283929	0.0925889	64
n265901:4934614	NONMMUT000371	0	1.29867	1.30976	0.538184	0.0628944	64
n297276:4387530	NONMMUT000571	0	0.712158	0.493544	0.185278	0.189272	64
n280381:5224465	NONMMUT009278	0	1.15026	0.808706	0.47367	0.0122492	64
n293878:5515155	NONMMUT014674	0	0.944244	0.759336	0.452923	0.378174	64
n293151:4369990	NONMMUT015091	0	0.889098	0.964809	0.257176	0.285038	64
n292167:4493704	NONMMUT031613	0	0.8407	0.951066	0.414827	0.100954	64
n289161:5530779	NONMMUT031647	0	1.05367	0.943012	0.315251	-0.1172	64
n265989:5498839	NONMMUT047188	0	1.04241	1.22228	0.333451	0.231523	64
n272247:5284281	NONMMUT052717	0	1.23442	1.01712	0.405508	0.421495	64
n281366:4505458	NONMMUT062356	0	1.11838	1.05158	0.552155	0.287582	64
n269868:5438699	NONMMUT074304	0	0.944197	0.979502	0.503931	0.44116	64
ENSMUST00000154480:4344511	ENSMUST00000154480	0	0.532807	0.705936	0.0903418	0.627427	65
ENSMUST00000164248:5071528	ENSMUST00000164248	0	0.986427	0.7283	0.366547	0.614337	65
ENSMUST00000118146:5152799	ENSMUST00000118146	0	0.548287	0.648649	0.89685	0.139768	66	akt not sig
ENSMUST00000119046:5494626	ENSMUST00000119046	0	0.60464	0.683142	0.494447	0.10753	66
ENSMUST00000120039:5213680	ENSMUST00000120039	0	1.3193	1.0067	1.07612	0.188993	66
ENSMUST00000123268:5382773	ENSMUST00000123268	0	0.865326	0.622564	0.952514	0.152498	66
ENSMUST00000124426:4930660	ENSMUST00000124426	0	0.834085	1.01468	1.18268	0.239409	66
ENSMUST00000125238:5339127	ENSMUST00000125238	0	0.832974	0.854887	1.21301	-0.0809322	66
ENSMUST00000125375:5441280	ENSMUST00000125375	0	1.13272	1.07671	0.844274	0.407592	66
ENSMUST00000126228:5243409	ENSMUST00000126228	0	0.568168	0.383544	0.673873	0.144332	66
ENSMUST00000126429:5431552	ENSMUST00000126429	0	1.01512	1.31071	1.10314	-0.137431	66
ENSMUST00000127711:5150084	ENSMUST00000127711	0	0.834394	0.62269	0.979029	0.129696	66
ENSMUST00000130448:5374939	ENSMUST00000130448	0	0.428744	0.689901	0.867053	0.016304	66
ENSMUST00000130631:4396183	ENSMUST00000130631	0	0.910743	0.98115	0.600593	-0.042219	66
ENSMUST00000131726:5104282	ENSMUST00000131726	0	0.770184	1.01857	0.770184	0.0857598	66
ENSMUST00000132030:4814668	ENSMUST00000132030	0	0.970941	1.08646	0.937969	0.515744	66
ENSMUST00000132126:4698886	ENSMUST00000132126	0	0.907212	0.762104	0.53075	0.344304	66
ENSMUST00000133614:5311981	ENSMUST00000133614	0	0.902394	1.04247	1.12326	-0.0346566	66
ENSMUST00000134016:4857235	ENSMUST00000134016	0	0.751377	0.48408	0.38033	0.0575257	66
ENSMUST00000134094:4524902	ENSMUST00000134094	0	0.435488	0.44501	0.781015	0.0792975	66
ENSMUST00000134929:4424527	ENSMUST00000134929	0	1.13101	1.33062	1.13506	-0.0588234	66
ENSMUST00000135063:5337519	ENSMUST00000135063	0	0.66541	0.441379	1.06025	-0.0145886	66
ENSMUST00000136306:4638126	ENSMUST00000136306	0	1.16369	1.13279	1.17441	-0.190654	66
ENSMUST00000136365:4412532	ENSMUST00000136365	0	1.06107	1.34033	1.24089	0.201891	66
ENSMUST00000137509:5459469	ENSMUST00000137509	0	0.899538	0.450646	0.411129	0.0293775	66
ENSMUST00000138897:5593727	ENSMUST00000138897	0	0.788099	0.834113	0.426408	0.0371894	66
ENSMUST00000139852:4610164	ENSMUST00000139852	0	0.978385	0.98627	0.510037	-0.118658	66
ENSMUST00000140146:4850281	ENSMUST00000140146	0	0.90402	1.02177	0.620752	0.112546	66
ENSMUST00000140310:4641099	ENSMUST00000140310	0	1.08719	0.594064	0.880293	0.243863	66
ENSMUST00000141432:4923777	ENSMUST00000141432	0	0.859874	1.1173	1.25976	0.244969	66
ENSMUST00000143933:4527852	ENSMUST00000143933	0	1.48608	1.34798	1.41207	0.298823	66
ENSMUST00000146286:4883320	ENSMUST00000146286	0	0.790013	0.794067	0.708818	0.111469	66
ENSMUST00000148169:5097292	ENSMUST00000148169	0	0.909297	1.10073	0.92713	0.0625584	66
ENSMUST00000148481:4667665	ENSMUST00000148481	0	0.564577	0.502315	1.0075	0.057788	66
ENSMUST00000149758:4964027	ENSMUST00000149758	0	0.549129	0.445568	0.868047	0.0641334	66
ENSMUST00000150178:4512387	ENSMUST00000150178	0	0.983298	1.21581	1.25951	-0.148633	66
ENSMUST00000150380:5203110	ENSMUST00000150380	0	0.859083	1.17384	1.17008	0.26383	66
ENSMUST00000151207:4996570	ENSMUST00000151207	0	0.750078	0.693739	1.07099	0.0796211	66
ENSMUST00000151234:4360945	ENSMUST00000151234	0	0.875178	0.93319	0.798132	0.171733	66
ENSMUST00000151841:5204869	ENSMUST00000151841	0	1.19205	0.920777	0.708371	0.0783027	66
ENSMUST00000152898:4502279	ENSMUST00000152898	0	0.503111	0.457302	1.11938	-0.168332	66
ENSMUST00000152933:5284879	ENSMUST00000152933	0	0.673263	0.648457	0.68028	0.0610032	66
ENSMUST00000154490:4566496	ENSMUST00000154490	0	0.653434	0.822596	0.928598	0.0853155	66
ENSMUST00000156354:5414226	ENSMUST00000156354	0	1.12956	0.962768	1.08825	-0.321265	66
ENSMUST00000156407:4916915	ENSMUST00000156407	0	0.760638	0.840412	0.784451	-0.0250031	66
ENSMUST00000159885:5281071	ENSMUST00000159885	0	1.05251	0.801323	0.662937	-0.169497	66
ENSMUST00000169699:4677266	ENSMUST00000169699	0	1.02323	1.14938	0.858021	0.236094	66
ENSMUST00000171743:4372930	ENSMUST00000171743	0	0.681593	0.434017	0.360126	0.0238633	66
ENSMUST00000174877:4956615	ENSMUST00000174877	0	0.469538	0.634367	0.943176	-0.536576	66
ENSMUST00000177263:5278704	ENSMUST00000177263	0	0.705625	0.770147	1.16254	0.235935	66
FR0068816:5181451	FR0068816	0	0.912373	0.893641	1.01698	0.188243	66
n287280:4313870	n287280	0	0.924579	0.764166	0.630629	0.123207	66
n291615:5241061	n291615	0	0.861294	0.833221	0.688752	-0.342499	66
n293803:5335022	n293803	0	0.68671	0.670479	0.745445	0.0385453	66
n415345:4544817	n415345	0	0.813638	0.747339	1.03495	-0.00263202	66
n269570:4442272	NONMMUT000899	0	0.667396	0.530884	0.333482	0.0684172	66
n276484:4648052	NONMMUT000929	0	1.64386	1.57793	1.61443	0.138624	66
n265655:5220005	NONMMUT001413	0	0.564488	0.86064	1.11329	-0.220996	66
n279987:4799536	NONMMUT001721	0	0.852512	0.848054	0.790155	-0.0152653	66
n283868:5413876	NONMMUT002458	0	1.12847	0.990217	0.734816	0.28558	66
n267567:4360793	NONMMUT002577	0	1.00084	0.93525	1.13758	0.54505	66
n295159:5480653	NONMMUT002746	0	0.916048	0.762587	0.814979	0.369835	66
n266937:4511586	NONMMUT003582	0	1.14744	1.14661	0.879093	0.351239	66
n278102:5171978	NONMMUT003645	0	1.12287	1.231	1.17634	0.444607	66
n284221:4324657	NONMMUT003816	0	0.804446	0.758089	0.810175	-0.290263	66
n289458:5341676	NONMMUT004361	0	0.967153	0.642042	0.813867	-0.442	66
n281034:4682631	NONMMUT004639	0	1.11813	1.02624	0.942263	0.224736	66
n271040:4862990	NONMMUT005513	0	0.814137	0.866091	0.542243	0.253779	66
n293255:5048025	NONMMUT006337	0	0.630319	0.667108	0.655893	-0.379866	66
n284879:5485515	NONMMUT006663	0	0.559712	0.815065	0.735393	-0.260384	66
n270400:5345121	NONMMUT007135	0	0.554708	0.694559	0.494932	0.073955	66
n283446:5443197	NONMMUT007331	0	1.31676	1.39358	1.35178	0.2885	66
n268764:4802083	NONMMUT008131	0	0.573992	0.690951	0.705069	0.175695	66
n285090:4858018	NONMMUT009191	0	1.04702	0.620419	0.60857	0.14371	66
n271624:4799041	NONMMUT009193	0	0.918888	1.02627	1.13371	0.154932	66
n286162:4991347	NONMMUT009301	0	0.518141	0.401047	0.47248	-0.0367326	66
n266967:4913794	NONMMUT009492	0	0.613721	0.593554	0.847617	-0.301105	66
n268969:4393918	NONMMUT011033	0	0.661356	0.678235	1.03222	-0.447773	66
n284836:4475041	NONMMUT013262	0	1.30852	1.56974	1.49371	0.621338	66
n272029:4384856	NONMMUT014156	0	1.02506	0.863566	1.15571	0.316511	66
n268739:5149795	NONMMUT014303	0	1.04673	0.953636	1.30211	0.4781	66
n271620:5610793	NONMMUT014549	0	1.28944	1.24866	1.34461	-0.108144	66
n292195:5001464	NONMMUT015148	0	0.728408	0.746796	0.499507	0.292205	66
n284384:5152794	NONMMUT017109	0	0.659022	0.666512	0.603712	-0.0755433	66
n272214:5556286	NONMMUT018680	0	0.826652	0.827753	0.646998	-0.279824	66
n284167:4675874	NONMMUT019864	0	0.917721	1.04045	1.04229	-0.309166	66
n280113:4749907	NONMMUT020931	0	0.93317	0.831206	0.740576	-0.248115	66
n270732:4466452	NONMMUT021683	0	1.04221	0.754767	0.633107	-0.0846397	66
n265624:4361270	NONMMUT021932	0	0.79406	1.04064	1.23777	-0.067143	66
n263881:4518560	NONMMUT022606	0	0.975755	0.777875	0.971222	0.313412	66
n279755:4996924	NONMMUT022654	0	0.447336	0.738367	1.12116	-0.121317	66
n278689:4813497	NONMMUT022874	0	0.490083	0.675628	1.02028	-0.322861	66
n414244:4894570	NONMMUT022915	0	1.56158	0.812411	0.924775	0.0563035	66
n291515:5481196	NONMMUT023284	0	0.544223	0.528036	0.662635	0.157878	66
n289220:5280045	NONMMUT024036	0	1.03028	0.686095	0.820317	0.311695	66
n284350:4815216	NONMMUT025661	0	0.923908	1.1275	0.954566	0.361602	66
n415925:4822107	NONMMUT026031	0	0.534358	0.802529	0.652188	-0.282379	66
n287506:5201746	NONMMUT026386	0	0.72643	0.642021	0.949632	0.0792095	66
n271528:5457020	NONMMUT026568	0	0.832672	0.554284	1.12679	-0.298941	66
n280602:4840477	NONMMUT027960	0	0.77326	0.921154	0.83678	0.215383	66
n267652:4736098	NONMMUT030875	0	1.0276	1.02258	1.00232	-0.2886	66
n283369:5519249	NONMMUT031445	0	0.866443	0.431711	0.723691	-0.0483747	66
n412676:4458874	NONMMUT031656	0	1.25983	1.37592	1.51915	0.194067	66
n278456:5086425	NONMMUT031748	0	0.983478	0.755645	0.930283	0.00802382	66
n271192:4958419	NONMMUT031930	0	0.6189	0.541561	0.65144	0.255231	66
n271723:5138722	NONMMUT032112	0	0.836342	0.875973	0.806194	0.0451449	66
n274539:4847472	NONMMUT032664	0	1.01339	1.09162	1.07929	0.148443	66
n289930:4546201	NONMMUT033880	0	0.623034	0.697586	0.496222	0.0393516	66
n287211:5448240	NONMMUT034151	0	0.938382	0.952525	1.04803	-0.0558293	66
n294229:4357440	NONMMUT034670	0	1.36716	1.14627	1.07716	0.654964	66
n264005:5127966	NONMMUT034967	0	0.797022	0.361895	0.478468	0.0298402	66
n293867:5226690	NONMMUT035108	0	0.95447	1.06538	0.894992	-0.0151232	66
n293880:4810554	NONMMUT035776	0	0.754989	0.865621	0.939301	0.216322	66
n279563:5597455	NONMMUT035870	0	0.981719	1.08991	1.32964	-0.0507076	66
n272872:4339825	NONMMUT035945	0	1.22014	1.16328	1.07236	-0.238951	66
n269136:5354719	NONMMUT037648	0	0.663809	0.463915	0.791893	0.100184	66
n277365:4619119	NONMMUT038269	0	0.979614	1.20956	0.870475	0.0884323	66
n413796:4785080	NONMMUT038457	0	1.57131	1.16491	1.36556	0.246321	66
n282886:4828809	NONMMUT038725	0	0.903216	0.858045	0.731944	-0.0494882	66
n414555:5096656	NONMMUT039158	0	1.15918	1.42757	1.28681	0.135273	66
n414555:5502318	NONMMUT039158	0	1.18218	1.2779	1.38167	0.281594	66
n292546:4745885	NONMMUT039386	0	0.915935	1.12665	0.889689	-0.149491	66
n283872:4765490	NONMMUT039454	0	0.849631	0.827807	0.616311	-0.131785	66
n288095:5285111	NONMMUT039517	0	0.516886	0.582201	0.72829	0.0177498	66
n292806:5371517	NONMMUT041093	0	0.572568	0.550373	0.456243	0.0362527	66
n343886:5259322	NONMMUT042395	0	0.795675	0.631834	1.09293	-0.0986358	66
n284730:5024301	NONMMUT042419	0	0.942297	1.02379	0.840508	0.222996	66
n264594:4945727	NONMMUT043365	0	0.463978	0.426615	0.629441	0.0147346	66
n279111:5053107	NONMMUT046024	0	0.525194	0.863045	0.77448	-0.176151	66
n269936:4958241	NONMMUT046564	0	1.39768	1.34912	1.49656	0.214281	66
n289473:4529380	NONMMUT046763	0	1.47146	1.31636	1.37287	0.724258	66
n273615:4940396	NONMMUT048569	0	1.09482	1.03142	0.990431	0.336587	66
n280130:4323427	NONMMUT049621	0	0.525931	0.483803	0.409648	0.206798	66
n276420:4306288	NONMMUT052074	0	0.940405	0.808353	1.00231	-0.517573	66
n279955:4672031	NONMMUT052582	0	0.302719	0.23453	0.699175	-0.265444	66
n269950:4358600	NONMMUT052992	0	1.33707	1.40206	1.41364	-0.0254748	66
n278351:4467841	NONMMUT053587	0	1.02808	0.64509	0.91228	0.0306216	66
n283636:5190441	NONMMUT054491	0	0.82873	0.860706	0.593787	0.306952	66
n283223:4406533	NONMMUT054700	0	0.954445	0.977808	1.01034	-0.191566	66
n270582:5565607	NONMMUT055722	0	1.29674	0.688055	0.658922	0.103513	66
n297287:4933355	NONMMUT055988	0	1.2633	0.780079	0.914336	-0.259188	66
n268763:4422522	NONMMUT057050	0	0.623511	0.758533	0.556315	-0.16359	66
n286687:4419159	NONMMUT057220	0	1.0285	0.928417	1.13991	0.177196	66
n274926:4926295	NONMMUT058317	0	0.87067	0.691373	0.626959	0.255159	66
n289046:5305243	NONMMUT058739	0	0.884191	0.796842	0.840744	0.348857	66
n266080:4477492	NONMMUT059326	0	0.859188	0.666137	0.786894	0.363113	66
n286546:5492865	NONMMUT059598	0	1.12517	0.910334	1.18538	0.386352	66
n273259:5360122	NONMMUT060861	0	1.158	1.214	0.98176	0.40312	66
n273225:5476788	NONMMUT061978	0	0.87357	0.858114	0.614982	0.0919846	66
n287301:5014400	NONMMUT062247	0	0.852943	0.965486	0.932816	-0.486132	66
n274657:5457096	NONMMUT065501	0	0.785141	0.919675	0.9934	0.0433799	66
n265826:4926053	NONMMUT066370	0	0.783978	0.912676	0.803836	0.15816	66
n295095:5606473	NONMMUT066959	0	1.12349	1.03534	0.793111	0.359593	66
n276721:4951517	NONMMUT069134	0	1.32724	0.815231	0.76861	0.282308	66
n274102:5577680	NONMMUT069189	0	0.826567	1.05835	0.774019	-0.0247963	66
n297338:4916359	NONMMUT069537	0	0.819409	0.536896	0.562679	0.129167	66
n267206:4307325	NONMMUT069958	0	1.23282	0.728935	0.797052	0.427214	66
n289135:4355963	NONMMUT070055	0	0.981278	0.66614	0.643372	-0.285797	66
n294806:4434356	NONMMUT070333	0	0.781334	0.608729	0.497039	0.211379	66
n282369:5021694	NONMMUT070777	0	0.813583	1.00057	0.950237	0.0794123	66
n291233:4872173	NONMMUT070970	0	0.664546	0.753196	1.35575	0.0318378	66
n273167:4466821	NONMMUT071268	0	1.01285	0.468669	0.707571	0.00871249	66
n281740:4500928	NONMMUT072222	0	1.1014	1.43311	1.20038	0.0930259	66
n276570:4441066	NONMMUT072297	0	0.688942	0.706702	0.762972	-0.218412	66
n274945:5073135	NONMMUT073014	0	1.21987	1.14372	1.21987	0.583931	66
n276554:5377513	NONMMUT073089	0	1.03283	0.772898	0.550669	0.16088	66
n286861:4606724	NONMMUT073354	0	0.667772	0.699714	0.875848	-0.262136	66
n267237:5093162	NONMMUT074070	0	0.608714	0.729488	0.889039	0.157181	66
n285475:5221729	NONMMUT074111	0	0.640502	0.727761	1.13322	0.144481	66
n277936:5254693	NONMMUT074698	0	0.878773	0.721206	1.16035	0.288076	66
NR_073167:4408566	NR_073167	0	0.813131	0.482542	0.501776	0.0924092	66
ENSMUST00000124778:4844142	ENSMUST00000124778	0	1.05381	0.721048	0.860834	0.787615	67
ENSMUST00000130613:5231096	ENSMUST00000130613	0	0.712737	0.75173	0.826315	0.954916	67
ENSMUST00000135061:4707117	ENSMUST00000135061	0	0.962477	1.04882	1.12956	0.663144	67
ENSMUST00000136688:5338499	ENSMUST00000136688	0	1.00289	1.04305	0.587582	0.853237	67
ENSMUST00000137483:4338585	ENSMUST00000137483	0	0.903057	1.01307	1.16882	0.809427	67
ENSMUST00000138235:4614444	ENSMUST00000138235	0	1.0494	0.936387	1.08511	1.23709	67
ENSMUST00000139982:5367013	ENSMUST00000139982	0	1.83893	2.149	2.27201	2.08117	67
ENSMUST00000139982:5487201	ENSMUST00000139982	0	1.27782	1.67054	1.69245	1.58423	67
ENSMUST00000142142:5174530	ENSMUST00000142142	0	0.904079	0.882513	1.01399	0.96495	67
ENSMUST00000143281:5405575	ENSMUST00000143281	0	0.868719	1.10705	1.0219	0.745422	67
ENSMUST00000145846:4814884	ENSMUST00000145846	0	1.0987	1.10759	1.11277	0.9001	67
ENSMUST00000153033:5466582	ENSMUST00000153033	0	0.785798	0.803774	0.881065	0.691516	67
ENSMUST00000161492:4716232	ENSMUST00000161492	0	1.37416	1.16273	0.898582	1.02195	67
n272330:5593363	NONMMUT002503	0	1.19202	1.0346	0.798623	0.700205	67
n267232:4886528	NONMMUT003879	0	0.845798	0.843561	0.864076	0.78877	67
n267232:5374170	NONMMUT003879	0	0.831614	1.09462	1.04171	0.915387	67
n282201:4357239	NONMMUT005755	0	0.761162	0.813421	1.00961	0.794672	67
n270258:4318128	NONMMUT009988	0	1.2565	1.00047	1.05088	0.642053	67
n291973:4530811	NONMMUT011413	0	1.26123	1.06452	1.17198	0.797691	67
n343292:4607918	NONMMUT013947	0	1.52128	1.51403	0.855774	0.96811	67
n297173:5170465	NONMMUT016573	0	1.43398	1.37	1.19614	0.966752	67
n272637:4891506	NONMMUT022387	0	0.797967	0.666634	1.05213	0.817288	67
n277270:5204475	NONMMUT026923	0	0.957889	0.982389	1.28497	0.944353	67
n275484:4962611	NONMMUT027393	0	1.06134	0.748407	1.08582	0.73588	67
n281032:4333466	NONMMUT028350	0	0.527754	0.529062	0.379082	0.341983	67
n297653:4479173	NONMMUT028943	0	0.401292	0.402442	0.444304	0.260507	67
n283046:4408894	NONMMUT031926	0	1.03607	0.977457	0.921721	0.624474	67
n280495:5410705	NONMMUT036824	0	1.23173	1.22731	1.33527	1.2442	67
n272408:5455937	NONMMUT044092	0	1.01162	0.66869	0.719165	0.707355	67
n276227:4478944	NONMMUT049816	0	0.940364	1.08475	1.34311	0.993969	67
n412091:5325148	NONMMUT049837	0	0.528135	0.58846	0.543351	0.388244	67
n273430:5583907	NONMMUT053008	0	0.533576	0.542967	0.707015	0.554631	67
n268946:5532575	NONMMUT053376	0	1.18249	1.23429	1.41726	1.46157	67
n289721:4777230	NONMMUT054315	0	0.748959	0.802068	0.835012	0.756288	67
n282195:4324848	NONMMUT055421	0	1.09492	0.80252	1.2143	0.784168	67
n282214:4682925	NONMMUT063929	0	1.2825	1.21191	1.28115	0.963683	67
n269868:4948111	NONMMUT074304	0	1.17319	1.23014	0.906223	0.731124	67
n282915:4561669	NONMMUT074510	0	0.776179	0.45408	0.507886	0.393347	67
n285245:4704913	NONMMUT039114	0	0.494708	0.483301	0.575744	0.983094	68
n295394:5083875	NONMMUT041137	0	0.281149	0.330157	0.358458	0.791879	68
n295010:5453568	NONMMUT063826	0	0.493262	0.518142	0.428025	0.730822	68
ENSMUST00000120791:4309592	ENSMUST00000120791	0	0.363419	0.377515	0.722114	0.182234	69
ENSMUST00000129688:5036656	ENSMUST00000129688	0	0.410948	0.685427	1.08038	0.376573	69	akt
ENSMUST00000132029:5522814	ENSMUST00000132029	0	0.460312	0.470232	1.21543	0.808334	69
ENSMUST00000136149:5065907	ENSMUST00000136149	0	0.847179	0.924056	1.59112	0.668114	69
ENSMUST00000136843:5221846	ENSMUST00000136843	0	0.693964	0.673158	1.12168	0.307749	69
ENSMUST00000141569:4945390	ENSMUST00000141569	0	0.599967	0.481774	1.1022	0.371193	69
ENSMUST00000142751:5150717	ENSMUST00000142751	0	0.386358	0.306544	1.00221	0.46273	69
ENSMUST00000150114:4394640	ENSMUST00000150114	0	0.704376	0.946762	1.70855	0.417965	69
ENSMUST00000154145:5166972	ENSMUST00000154145	0	0.672458	0.537441	0.978998	0.298081	69
n285608:4485041	n285608	0	1.07148	0.845108	1.33853	0.588511	69
n269707:4538163	NONMMUT000884	0	0.4992	0.407055	0.917585	0.106266	69
n294733:5545260	NONMMUT001279	0	0.687061	0.699656	0.979808	0.564643	69
n267659:5450166	NONMMUT003922	0	0.576032	0.52451	1.23227	-0.0163694	69
n295417:4306082	NONMMUT006462	0	0.740324	0.28905	1.20049	0.693252	69
n275720:4550871	NONMMUT006571	0	0.789736	0.679594	1.07664	0.473405	69
n277289:4457481	NONMMUT010815	0	0.81795	0.792474	1.26169	0.393838	69
n280307:5494674	NONMMUT017064	0	0.561531	0.377137	1.01261	0.391647	69
n279042:5562045	NONMMUT018492	0	0.301297	0.401365	0.852142	0.310196	69
n276572:5088355	NONMMUT020229	0	0.182342	0.341086	0.698505	0.242729	69
n286225:4477476	NONMMUT022370	0	0.596871	0.644765	1.00937	0.622313	69
n269331:5286202	NONMMUT022745	0	0.486073	0.645083	1.60975	0.494668	69
n269177:4791057	NONMMUT028247	0	0.448906	0.360181	1.03316	0.534628	69
n293581:5146859	NONMMUT029762	0	0.726238	0.715198	1.19331	0.828456	69
n287209:5495526	NONMMUT033184	0	0.553532	0.735631	1.16864	0.544854	69
n287579:5289789	NONMMUT035908	0	0.854313	0.808006	1.44081	0.375753	69
n293669:5025488	NONMMUT037294	0	0.408429	0.408429	1.01774	0.337553	69
n279707:5036545	NONMMUT041037	0	0.495136	0.444451	1.05415	0.635919	69
n277833:5389495	NONMMUT043551	0	0.832717	0.947979	1.26832	0.833746	69	akt
n293437:4810310	NONMMUT046367	0	0.336913	0.340466	1.41894	0.846243	69
n420904:4940861	NONMMUT053804	0	0.675537	0.423722	1.12719	0.385871	69
n284078:4509107	NONMMUT055607	0	0.480006	0.415635	1.06343	0.694217	69
n278463:4352128	NONMMUT057428	0	0.525684	0.764496	1.23641	0.164816	69
n266649:4981690	NONMMUT057912	0	0.418697	0.30415	0.731192	0.218133	69
n287511:5297131	NONMMUT060587	0	0.92234	0.606325	1.26525	0.327195	69
n292743:5459120	NONMMUT067511	0	0.641488	0.654072	1.03032	0.441566	69
n284881:4609467	NONMMUT069085	0	0.69631	0.48668	0.81924	0.473443	69
n278035:5224679	NONMMUT072433	0	0.435807	0.491476	0.865514	0.140064	69
n267639:5026957	NONMMUT073155	0	1.1238	0.915038	1.55206	0.584129	69
n292936:5403945	NONMMUT074526	0	0.793374	0.813596	1.03791	0.590002	69	akt
ENSMUST00000126560:5431090	ENSMUST00000126560	0	0.366105	0.289578	0.845436	0.642636	70
ENSMUST00000131174:4805690	ENSMUST00000131174	0	0.501934	0.289424	0.784674	0.73258	70
ENSMUST00000137804:4904963	ENSMUST00000137804	0	0.512896	0.593696	0.941346	1.01309	70
ENSMUST00000143252:4922225	ENSMUST00000143252	0	0.565544	0.633698	0.769517	0.933335	70
ENSMUST00000153236:4797457	ENSMUST00000153236	0	0.249619	0.236141	0.810034	0.759595	70
ENSMUST00000175862:5033183	ENSMUST00000175862	0	0.83443	0.712391	1.2436	1.03862	70
FR0400905:4310273	FR0400905	0	0.810449	0.810449	1.30977	1.15233	70
n288759:5387347	NONMMUT000809	0	0.73349	0.668379	1.59212	1.46434	70
n291548:4449092	NONMMUT002725	0	0.650928	0.785382	1.4277	1.10824	70
n268297:4362355	NONMMUT016776	0	0.802006	0.644881	1.2765	0.987043	70
n284829:4730552	NONMMUT026929	0	0.53273	0.487208	0.8936	0.878604	70
n278699:5146837	NONMMUT039831	0	0.288081	0.187249	0.71174	0.520466	70
n267714:5553074	NONMMUT045354	0	0.39322	0.285634	0.855747	0.890758	70
n271536:4542271	NONMMUT055815	0	0.482748	0.38534	0.857691	0.644042	70
n295145:5105484	NONMMUT058932	0	0.640066	0.478473	1.17757	1.36295	70
n290485:5505396	NONMMUT065779	0	0.436522	0.425334	0.676697	0.589812	70
n266602:5142997	NONMMUT066376	0	0.53354	0.48838	0.758591	0.646553	70
ENSMUST00000124969:5108630	ENSMUST00000124969	0	0.378053	0.367489	0.54517	0.861929	71
ENSMUST00000128615:4432192	ENSMUST00000128615	0	0.777172	0.870467	1.21747	1.74659	71
ENSMUST00000132340:4524867	ENSMUST00000132340	0	0.262868	0.297405	0.60687	0.803702	71
ENSMUST00000149127:5074007	ENSMUST00000149127	0	0.248393	0.226888	0.412831	0.961447	71
n278336:4830868	n278336	0	0.310315	0.373164	0.573405	0.936441	71
n271473:4562051	NONMMUT016176	0	0.256155	0.351783	0.660213	0.961642	71
n289612:4486602	NONMMUT019426	0	0.219931	0.271787	0.592018	0.728949	71
n272049:4491333	NONMMUT062809	0	0.705432	0.388106	0.875902	1.11634	71
ENSMUST00000106665:4924038	ENSMUST00000106665	0	0.626983	0.698554	0.364185	-0.00614185	72
ENSMUST00000117938:4695196	ENSMUST00000117938	0	0.626988	0.862415	0.514013	0.00274011	72
ENSMUST00000121164:4704097	ENSMUST00000121164	0	0.773868	0.907731	0.507581	0.299808	72
ENSMUST00000127486:4612184	ENSMUST00000127486	0	0.381115	0.904822	0.404871	-0.168607	72
ENSMUST00000129118:4477460	ENSMUST00000129118	0	0.288958	0.656855	0.253195	0.130954	72
ENSMUST00000142244:4393954	ENSMUST00000142244	0	1.10122	1.61102	1.20205	0.130361	72
ENSMUST00000151378:4882915	ENSMUST00000151378	0	0.547336	1.05016	0.239444	-0.074674	72
ENSMUST00000174478:5248253	ENSMUST00000174478	0	0.699395	0.87514	0.504163	0.164025	72
n272968:5426937	NONMMUT012925	0	0.254399	1.26701	0.752678	0.0851315	72
n267347:5524592	NONMMUT014647	0	0.576511	0.791106	0.46397	0.255509	72
n273254:4458715	NONMMUT022865	0	0.832793	0.966494	0.402778	-0.0712308	72
n264474:4307010	NONMMUT025880	0	0.401616	0.895631	0.533051	-0.0718229	72
n416230:4637244	NONMMUT032236	0	1.03719	1.3365	0.874834	0.255443	72
n277401:4347230	NONMMUT036050	0	0.680874	1.03371	0.631867	0.0417161	72
n266237:4658466	NONMMUT045314	0	0.751984	0.990831	0.492614	0.197223	72
n290917:4890695	NONMMUT053491	0	0.497254	1.10308	0.635543	0.191649	72
n269233:5198343	NONMMUT053758	0	0.594379	1.0173	0.475968	-0.111109	72
n412915:4630673	NONMMUT054799	0	0.49252	0.780445	0.50048	-0.0828023	72
n269119:5357292	NONMMUT059540	0	0.861964	0.996442	0.596242	0.277956	72
n296573:4372435	NONMMUT063889	0	0.301283	0.889983	0.375273	0.0918193	72
n266443:5189586	NONMMUT065343	0	0.653053	1.48783	0.768097	0.327404	72
n275732:4794430	NONMMUT065732	0	0.597827	1.00631	0.646685	-0.0631832	72
n272691:4494452	NONMMUT066281	0	0.54863	0.984296	0.54587	-0.301349	72
ENSMUST00000129581:5337091	ENSMUST00000129581	0	0.596814	0.858228	0.562258	0.477004	73
ENSMUST00000133716:4978940	ENSMUST00000133716	0	0.349297	0.645801	0.430153	0.320018	73
ENSMUST00000137446:4711696	ENSMUST00000137446	0	0.507454	1.0264	0.697355	0.508369	73
ENSMUST00000137847:5504415	ENSMUST00000137847	0	0.700626	1.24336	0.685329	0.445888	73
ENSMUST00000142921:5210482	ENSMUST00000142921	0	0.53915	0.982486	0.4532	0.512637	73
ENSMUST00000146453:5493150	ENSMUST00000146453	0	0.642125	1.2914	0.59116	0.839496	73
n293216:4592201	NONMMUT002276	0	0.382886	1.07167	0.251898	0.339113	73
n277939:5200282	NONMMUT021135	0	0.65861	1.01088	0.519876	0.377993	73
n291008:4992047	NONMMUT021468	0	0.779469	1.19947	0.572912	0.77348	73
n280164:5391070	NONMMUT023167	0	0.339609	0.851231	0.463627	0.432617	73
n296938:5563591	NONMMUT028027	0	0.770725	1.01763	0.334297	0.616809	73
n268836:4814678	NONMMUT030429	0	0.941436	1.25756	0.790872	0.545855	73
n293249:5256000	NONMMUT031659	0	0.789929	1.04554	0.669451	0.520628	73
n414362:5014370	NONMMUT032025	0	0.310465	0.58132	0.357972	0.382864	73
n287209:4946556	NONMMUT033184	0	0.392923	1.04366	0.354693	0.383899	73
n268073:4724305	NONMMUT035573	0	0.696201	1.1412	0.787264	0.499869	73
n290060:4956999	NONMMUT038510	0	0.270731	0.780723	0.167602	0.219608	73
n412264:5509466	NONMMUT041572	0	0.538765	1.10613	0.791565	0.663128	73
n265278:5508487	NONMMUT045775	0	0.415986	0.813719	0.402776	0.341585	73
n288143:4623877	NONMMUT052139	0	0.67508	1.09718	0.690056	0.41801	73
n264821:4950446	NONMMUT060709	0	0.440667	0.893876	0.541271	0.477198	73
n281176:4570304	NONMMUT022766	0	0.690476	1.07713	0.33486	0.791063	74
ENSMUST00000117625:5434824	ENSMUST00000117625	0	0.708236	1.42401	1.57738	0.267726	75
ENSMUST00000126588:4871757	ENSMUST00000126588	0	0.420105	0.61865	0.636276	0.149433	75
ENSMUST00000131250:4722646	ENSMUST00000131250	0	0.497345	1.02167	1.24542	0.204933	75
ENSMUST00000131602:4775222	ENSMUST00000131602	0	0.64701	0.879232	1.07836	0.322728	75
ENSMUST00000133187:5522365	ENSMUST00000133187	0	0.610113	0.773679	0.77145	0.292671	75	akt
ENSMUST00000135195:4827503	ENSMUST00000135195	0	0.688214	1.00955	1.22724	0.430172	75
ENSMUST00000138813:4679636	ENSMUST00000138813	0	0.490364	0.553896	0.761139	0.260071	75
ENSMUST00000140857:4379426	ENSMUST00000140857	0	0.519684	0.988563	0.831569	0.267872	75
ENSMUST00000142219:4857281	ENSMUST00000142219	0	0.360591	0.88376	0.922484	0.241955	75
ENSMUST00000147162:5121850	ENSMUST00000147162	0	1.03425	1.12374	1.23699	0.712215	75
ENSMUST00000148824:5296003	ENSMUST00000148824	0	0.590761	1.08166	1.30678	0.439964	75
ENSMUST00000154476:4595924	ENSMUST00000154476	0	0.692308	0.901529	0.871083	0.504381	75
ENSMUST00000155155:5160776	ENSMUST00000155155	0	0.624449	1.15393	0.896083	0.588671	75
ENSMUST00000161798:4383899	ENSMUST00000161798	0	0.789845	0.963689	0.885395	0.530716	75
ENSMUST00000170597:5616639	ENSMUST00000170597	0	0.815435	1.1559	1.44994	0.318684	75
ENSMUST00000177009:4361394	ENSMUST00000177009	0	0.493921	0.682226	1.06245	0.157626	75
n264290:5583777	NONMMUT004908	0	0.662659	0.866287	0.73845	0.33612	75
n273505:4455737	NONMMUT010110	0	0.928627	1.03526	1.30252	0.464613	75
n275277:5481865	NONMMUT013797	0	0.788602	1.02128	1.31699	0.520996	75
n283917:5124671	NONMMUT015631	0	0.356724	0.77284	0.959062	0.182403	75
n279461:4742557	NONMMUT017621	0	0.735183	1.19597	1.12506	0.470182	75
n275695:4697379	NONMMUT019913	0	1.0126	1.32882	1.27479	0.500621	75
n290272:4326261	NONMMUT024525	0	0.51012	0.896868	0.680087	0.374274	75
n273220:4585579	NONMMUT026999	0	0.590933	0.867703	1.04697	0.497158	75
n283504:4351039	NONMMUT035745	0	0.711685	1.11445	1.24908	0.433052	75
n281960:5324354	NONMMUT041874	0	0.613085	0.863317	0.694446	0.364201	75
n291593:4355978	NONMMUT042051	0	0.288331	1.15335	1.21171	0.420201	75
n266732:4677276	NONMMUT053428	0	0.561466	1.06015	1.07199	0.559719	75
n266732:5230864	NONMMUT053428	0	0.772792	1.33592	1.69721	0.525113	75
n292034:4316608	NONMMUT054328	0	0.518492	0.92371	0.761686	0.635088	75
n285791:5025533	NONMMUT055807	0	0.653373	1.23472	1.47327	0.239545	75
n277132:4681079	NONMMUT057895	0	0.961765	1.04798	1.14419	0.511848	75
n275266:5082294	NONMMUT058179	0	0.483683	1.04017	0.912128	0.283953	75
n283967:4353162	NONMMUT065238	0	0.628105	0.731124	1.00061	0.346085	75
n278081:4875441	NONMMUT068903	0	0.724366	1.12799	1.25136	0.546943	75
n267052:5163471	NONMMUT071768	0	0.795885	1.17887	1.27541	0.659712	75
ENSMUST00000155605:4548463	ENSMUST00000155605	0	0.729808	1.09137	1.16344	1.01533	76
ENSMUST00000159465:4907334	ENSMUST00000159465	0	0.622407	0.995488	1.0583	0.823007	76
ENSMUST00000170252:4807209	ENSMUST00000170252	0	0.437963	0.888897	1.07824	1.00108	76
n271265:4361024	NONMMUT031424	0	0.733681	1.09362	1.08034	0.850706	76
n294782:5231190	NONMMUT042263	0	0.639294	0.863747	1.15746	0.999413	76
ENSMUST00000129854:5565724	ENSMUST00000129854	0	0.29533	0.589032	0.519138	0.880184	77
n290609:5009487	NONMMUT022640	0	0.326633	0.564601	0.606693	1.05508	77
n281133:5485413	NONMMUT032848	0	0.390712	0.661185	0.790357	0.951968	77
n268095:5340096	NONMMUT045553	0	0.36609	0.765147	0.813466	1.03029	77
ENSMUST00000110989:4569042	ENSMUST00000110989	0	0.557184	0.738885	1.08988	0.738354	78
ENSMUST00000128849:4654235	ENSMUST00000128849	0	0.126103	0.553439	0.776148	0.491054	78
ENSMUST00000129074:5551875	ENSMUST00000129074	0	0.208255	0.583794	0.863925	0.377045	78
ENSMUST00000137657:5238254	ENSMUST00000137657	0	0.347426	0.528651	1.12971	0.615051	78
ENSMUST00000154999:4310416	ENSMUST00000154999	0	0.38964	0.633174	0.804254	0.522416	78
ENSMUST00000161990:4648109	ENSMUST00000161990	0	0.413807	0.773851	1.07365	0.655953	78
ENSMUST00000167812:4443907	ENSMUST00000167812	0	0.607713	0.860825	1.97178	1.30723	78
n285424:4309548	NONMMUT005432	0	0.151949	0.470292	0.754481	0.477009	78
n272929:5575015	NONMMUT012277	0	0.39902	0.847348	1.22548	0.893944	78
n270982:4612662	NONMMUT012356	0	0.20207	0.509858	0.799829	0.572015	78
n296092:4812981	NONMMUT017411	0	0.369257	0.563965	1.00404	0.681384	78
n274746:4697794	NONMMUT020782	0	0.44993	0.60005	0.872946	0.698605	78
n287601:5287502	NONMMUT021181	0	0.261762	0.543082	0.78149	0.552568	78	akt
n290313:4351307	NONMMUT021585	0	0.359282	0.614903	1.16911	0.61693	78
n276349:5179715	NONMMUT026766	0	0.490766	0.709503	1.09094	0.754207	78
n290077:5366300	NONMMUT051735	0	0.571456	0.808284	1.1624	0.705013	78
n273194:5592802	NONMMUT060994	0	0.595898	1.05922	1.38171	1.1615	78
n272049:4710887	NONMMUT062809	0	0.369592	0.446716	0.595532	0.460102	78
n268927:4557496	NONMMUT068518	0	0.31639	0.518693	1.24082	0.804624	78
n265933:4435248	NONMMUT071922	0	0.305139	0.550288	0.860944	0.372279	78
n284657:5122581	NONMMUT073256	0	0.461047	1.22593	1.67675	1.28343	78
ENSMUST00000128763:4816952	ENSMUST00000128763	0	0.579091	0.858441	1.42245	1.21384	79
ENSMUST00000149507:4368055	ENSMUST00000149507	0	0.431792	0.879433	1.61653	1.30414	79
ENSMUST00000153404:4376920	ENSMUST00000153404	0	0.251354	0.566569	1.08573	1.05483	79
n268826:4877634	NONMMUT017930	0	0.25859	0.537498	0.87579	0.905102	79
n272424:5071146	NONMMUT023591	0	0.314552	0.492004	0.923427	0.918356	79
n273137:5078274	NONMMUT026928	0	0.227132	0.448919	0.997211	0.886468	79
n283833:4891654	NONMMUT037121	0	0.142701	0.56524	0.819276	0.942772	79
n282458:4823671	NONMMUT072173	0	0.147849	0.307273	0.653433	0.534069	79
ENSMUST00000126931:5217827	ENSMUST00000126931	0	0.200402	0.323633	0.546342	0.692173	80
ENSMUST00000127842:4470285	ENSMUST00000127842	0	0.253291	0.380958	1.02222	1.1017	80
ENSMUST00000164817:5499423	ENSMUST00000164817	0	0.207446	0.356769	0.477247	0.759618	80
n288586:5346442	NONMMUT026926	0	0.212483	0.328212	0.61252	0.713087	80
n278601:4917920	NONMMUT035533	0	0.299651	0.507398	0.650472	1.03171	80
n288720:4332740	NONMMUT053145	0	0.326484	0.577505	0.849358	1.14337	80
n272941:5299534	NONMMUT072988	0	0.285937	0.522862	0.609691	1.20183	80

## Sheet: the description of sheet 2
The name of table	Header	the description of header
modelfile	modelnumber	The trend ID
	od	The number does not repersent the actual the value of expression level, but the rangeability of five groups which is Classification Mark
	1d
	3d
	1w
	3w
	lncRNAs_assigned	The actual LncRNA number in this trend
	lncRNAs_expected	The theoretical LncRNA number in this trend by replacement method
	p_value	The significant level
	adj_p-value	Adjusting sigificant level

## Sheet: Sheet2
modelnumber	od	1d	3d	1w	3w	lncRNAs_assigned	lncRNAs_expected	p-value	adj_p-value
1	0	-1	-2	-3	-4	0	1.43333	1	1
2	0	-1	-2	-3	-3	1	1.55833	0.789699	1
3	0	-1	-2	-3	-2	32	4.475	2.55787e-17	2.04629e-15
4	0	-1	-2	-2	-3	0	3.59167	1	1
5	0	-1	-2	-2	-2	7	4	0.110371	1
6	0	-1	-2	-2	-1	127	11.6167	4.18808e-86	3.35046e-84
7	0	-1	-2	-1	-2	4	12.1667	0.998048	1
8	0	-1	-2	-1	-1	38	20.3167	0.000260012	0.020801
9	0	-1	-2	-1	0	28	12.9	0.000166635	0.0133308
10	0	-1	-1	-2	-3	1	4.50833	0.989064	1
11	0	-1	-1	-2	-2	3	7.725	0.98318	1
12	0	-1	-1	-2	-1	186	19.5833	2.26372e-116	1.81097e-114
13	0	-1	-1	-1	-2	5	15.525	0.999452	1
14	0	-1	-1	-1	-1	53	22.3	1.66653e-08	1.33322e-06
15	0	-1	-1	-1	0	83	21.1667	5.64295e-25	4.51436e-23
16	0	-1	-1	0	-1	5	27.3833	1	1
17	0	-1	-1	0	0	15	32.2333	0.999774	1
18	0	-1	-1	0	1	4	11.6167	0.997008	1
19	0	-1	0	-1	-2	0	11.4833	1	1
20	0	-1	0	-1	-1	4	23.9	1	1
21	0	-1	0	-1	0	28	43.6667	0.995829	1
22	0	-1	0	0	-1	2	40	1	1
23	0	-1	0	0	0	29	42.4667	0.988875	1
24	0	-1	0	0	1	6	19.5833	0.999909	1
25	0	-1	0	1	0	0	23.6833	1	1
26	0	-1	0	1	1	9	9.98333	0.666116	1
27	0	-1	0	1	2	6	4.475	0.292659	1
28	0	0	-1	-2	-3	0	1.99167	1	1
29	0	0	-1	-2	-2	1	3.25	0.961374	1
30	0	0	-1	-2	-1	34	9.98333	1.67436e-09	1.33948e-07
31	0	0	-1	-1	-2	0	7.625	1	1
32	0	0	-1	-1	-1	3	11.7667	0.999386	1
33	0	0	-1	-1	0	28	32.2333	0.798399	1
34	0	0	-1	0	-1	0	35.6167	1	1
35	0	0	-1	0	0	11	42.4667	1	1
36	0	0	-1	0	1	1	20.3167	1	1
37	0	0	0	-1	-2	0	5.98333	1	1
38	0	0	0	-1	-1	1	19.8667	1	1
39	0	0	0	-1	0	53	42.4667	0.062632	1
40	0	0	0	0	-1	0	29.45	1	1
41	0	0	0	0	1	14	22.3	0.976629	1
42	0	0	0	1	0	11	32.5	0.999997	1
43	0	0	0	1	1	18	11.7667	0.0536777	1
44	0	0	0	1	2	9	4	0.0211906	1
45	0	0	1	0	-1	1	20.2833	1	1
46	0	0	1	0	0	7	32.5	1	1
47	0	0	1	0	1	0	23.9	1	1
48	0	0	1	1	0	14	21.1667	0.960784	1
49	0	0	1	1	1	8	19.8667	0.9992	1
50	0	0	1	1	2	5	7.725	0.884189	1
51	0	0	1	2	1	14	9.76667	0.118345	1
52	0	0	1	2	2	9	3.25	0.00622418	0.497935
53	0	0	1	2	3	8	1.55833	0.000215819	0.0172655
54	0	1	0	-1	-2	0	5.28333	1	1
55	0	1	0	-1	-1	0	9.76667	1	1
56	0	1	0	-1	0	0	23.6833	1	1
57	0	1	0	0	-1	3	19.3833	0.999999	1
58	0	1	0	0	0	8	32.5	1	1
59	0	1	0	0	1	0	27.3833	1	1
60	0	1	0	1	0	14	30.3667	0.999708	1
61	0	1	0	1	1	5	35.6167	1	1
62	0	1	0	1	2	1	12.1667	0.999995	1
63	0	1	1	0	-1	4	11.0167	0.995262	1
64	0	1	1	0	0	15	21.1667	0.93447	1
65	0	1	1	0	1	2	40	1	1
66	0	1	1	1	0	169	32.2333	1.811e-67	1.4488e-65
67	0	1	1	1	1	38	29.45	0.0710698	1
68	0	1	1	1	2	3	15.525	0.999977	1
69	0	1	1	2	1	39	19.3833	5.01634e-05	0.00401307
70	0	1	1	2	2	17	7.625	0.00224438	0.17955
71	0	1	1	2	3	8	3.59167	0.0302494	1
72	0	1	2	1	0	23	12.9333	0.0069412	0.555296
73	0	1	2	1	1	21	20.2833	0.466246	1
74	0	1	2	1	2	1	11.4833	0.99999	1
75	0	1	2	2	1	36	11.0167	1.63318e-09	1.30654e-07
76	0	1	2	2	2	5	5.98333	0.713287	1
77	0	1	2	2	3	4	4.50833	0.659524	1
78	0	1	2	3	2	21	5.28333	1.81243e-07	1.44995e-05
79	0	1	2	3	3	8	1.99167	0.00105623	0.0844982
80	0	1	2	3	4	7	1.43333	0.000706303	0.0565042
