# Supplementary material for: Aberrant LncRNA Expression Profile in a Contusion Spinal Cord Injury Mouse Model
Source: Biomed Res Int. 2016 Sep 4;2016:9249401. doi: 10.1155/2016/9249401 (PMC5027055; doi:10.1155/2016/9249401)
Supplement: Supplementary file 1 — S1 license pdf: The License Awarded by Soochow University. Table S1: Differential Expression of LncRNAs and Annotation. Table S2: Differential Expression of mRNAs and Annotation. Table S3: mRNAs STC Increase or Decrease. Table S4: LncRNAs STC Increase or Decrease. Table S5: The Significant GO Terms for Differentially Expressed. Table S6: The Significant Pathways of Differentially Expressed Genes. Table S7: The Quantity of the mRNA and LncRNA Network. S1 Fig: The dynamic network between LncRNAs and mRNAs. In this map, the circles with a green line represented LncRNAs, and the other circles represented mRNA. The lines between circles indicated regulation between these genes. The size of the circles indicated the ability of interaction between the genes. This ability was quantified by the degree, which was defined as the connective number between genes. The color was in accordance with the results of the clustering analysis, which was defined as the K-core. The same K-core indicated the similarity and correlation of function between genes. The red color representing the maximal K-core indicated the strongest regulation level in this network. [file 9249401.f1.zip › S5 Table.xls]

## Sheet: the description of sheet 1 2
The name of table	Header	The description of header
The significant GO term of differential expression genes	go_id	GO ID corresponding with GO database access number
	go_name	GO name corresponding with GO database access name
	go_diffgene_count	The number of differential expression genes in one GO term
	go_gene_count	The number of genes in one GO term at GO database
	enrichment	Enrichment is define as evaluating the experiment effect at the same sigificance
	pvalue	Evaluating the sigificance level of GO (p<0.0001 with yellow color)
	FDR	False discovery rate
The differential expression genes of significant GO term	go_id	GO ID corresponding GO database access number
	go_name	GO name corresponding with GO database access name
	enrichment	Enrichment is define as evaluating the experiment effect at the same sigificance
	pvalue	Evaluating the sigificance level of GO (p<0.0001 with yellow color)
	FDR	False discovery rate
	gene_id	Gene ID corresponding with NCBI GenBank access number
	gene_name	Gene name corresponding with NCBI GenBank access name

## Sheet: sheet 1
go_id	go_name	go_diffgene_count	go_gene_count	enrichment	pvalue	FDR
GO:0006810	transport	253	1712	4.47815	4.49779e-91	1.65609e-87
GO:0007155	cell adhesion	119	500	7.21205	2.15592e-65	3.96904e-62
GO:0006811	ion transport	122	570	6.48584	1.85009e-61	2.27067e-58
GO:0008152	metabolic process	127	991	3.8834	1.82921e-38	1.68379e-35
GO:0045087	innate immune response	53	180	8.92247	1.60147e-34	1.17932e-31
GO:0034765	regulation of ion transmembrane transport	48	149	9.76195	2.22871e-33	1.36768e-30
GO:0006629	lipid metabolic process	75	409	5.55673	3.88301e-33	2.04247e-30
GO:0016310	phosphorylation	96	684	4.25301	2.50212e-32	1.1516e-29
GO:0006915	apoptotic process	82	540	4.60152	4.09265e-30	1.67435e-27
GO:0006468	protein phosphorylation	86	611	4.26519	4.13558e-29	1.52272e-26
GO:0055085	transmembrane transport	67	385	5.27346	2.8186e-28	9.43462e-26
GO:0007165	signal transduction	178	2212	2.43846	3.61765e-27	1.11002e-24
GO:0006813	potassium ion transport	38	129	8.92638	5.39212e-25	1.52721e-22
GO:0007268	synaptic transmission	36	114	9.56928	6.69722e-25	1.76137e-22
GO:0035556	intracellular signal transduction	49	244	6.08538	9.66327e-24	2.37201e-21
GO:0006954	inflammatory response	46	214	6.51367	1.19429e-23	2.74836e-21
GO:0043066	negative regulation of apoptotic process	67	480	4.22975	1.25313e-22	2.71413e-20
GO:0008285	negative regulation of cell proliferation	53	315	5.09855	7.87599e-22	1.61108e-19
GO:0043065	positive regulation of apoptotic process	47	258	5.52026	6.15452e-21	1.19268e-18
GO:0030198	extracellular matrix organization	29	88	9.98612	8.15711e-21	1.50172e-18
GO:0006955	immune response	38	171	6.73394	3.18645e-20	5.58692e-18
GO:0042391	regulation of membrane potential	25	64	11.837	3.65889e-20	6.12365e-18
GO:0007275	multicellular organismal development	93	954	2.95404	1.01719e-19	1.6252e-17
GO:0030335	positive regulation of cell migration	33	129	7.75186	1.05934e-19	1.6252e-17
GO:0008284	positive regulation of cell proliferation	55	382	4.36296	2.37703e-19	3.50088e-17
GO:0001525	angiogenesis	38	189	6.09261	1.26749e-18	1.79496e-16
GO:0055114	oxidation-reduction process	75	706	3.21913	4.14637e-18	5.65442e-16
GO:0006508	proteolysis	67	585	3.47057	6.10532e-18	8.02849e-16
GO:0008203	cholesterol metabolic process	25	80	9.4696	1.99402e-17	2.53172e-15
GO:0006816	calcium ion transport	31	132	7.11655	2.1456e-17	2.63337e-15
GO:0006935	chemotaxis	28	110	7.71342	8.74188e-17	1.03831e-14
GO:0071805	potassium ion transmembrane transport	24	83	8.76223	6.8123e-16	7.8384e-14
GO:0045944	positive regulation of transcription from RNA polymerase II promoter	73	745	2.96926	9.45419e-16	1.05486e-13
GO:0007399	nervous system development	44	307	4.34306	1.4128e-15	1.52998e-13
GO:0006897	endocytosis	30	143	6.35721	2.03692e-15	2.14283e-13
GO:0008202	steroid metabolic process	23	79	8.82231	2.44424e-15	2.49991e-13
GO:0030154	cell differentiation	65	636	3.09698	5.54761e-15	5.52062e-13
GO:0006633	fatty acid biosynthetic process	21	67	9.49787	8.43357e-15	8.17168e-13
GO:0007166	cell surface receptor signaling pathway	28	132	6.42785	1.41014e-14	1.33132e-12
GO:0019221	cytokine-mediated signaling pathway	22	79	8.43873	2.93623e-14	2.7028e-12
GO:0042981	regulation of apoptotic process	31	170	5.52579	4.06147e-14	3.6474e-12
GO:0034220	ion transmembrane transport	32	182	5.32795	4.44224e-14	3.89064e-12
GO:0006836	neurotransmitter transport	17	43	11.9801	4.54366e-14	3.89064e-12
GO:0030199	collagen fibril organization	16	37	13.1039	4.9732e-14	4.16167e-12
GO:0010811	positive regulation of cell-substrate adhesion	15	32	14.2044	7.57416e-14	6.19735e-12
GO:0007628	adult walking behavior	16	39	12.4319	1.36839e-13	1.09531e-11
GO:0046777	protein autophosphorylation	29	156	5.6332	1.73208e-13	1.35692e-11
GO:0035235	ionotropic glutamate receptor signaling pathway	13	23	17.1276	1.77805e-13	1.36391e-11
GO:0042493	response to drug	26	126	6.25294	2.6908e-13	2.02194e-11
GO:0009615	response to virus	18	59	9.2449	1.42404e-12	1.04332e-10
GO:0031175	neuron projection development	22	94	7.09212	1.47013e-12	1.04332e-10
GO:0016126	sterol biosynthetic process	13	26	15.1514	1.47346e-12	1.04332e-10
GO:0007411	axon guidance	24	115	6.32404	1.87858e-12	1.30508e-10
GO:0015031	protein transport	54	538	3.04154	2.82799e-12	1.92827e-10
GO:0019233	sensory perception of pain	18	62	8.79756	3.70136e-12	2.4779e-10
GO:0007613	memory	17	56	9.19904	7.03818e-12	4.6276e-10
GO:0045766	positive regulation of angiogenesis	21	92	6.91692	8.45454e-12	5.46134e-10
GO:0070374	positive regulation of ERK1 and ERK2 cascade	20	84	7.21493	1.21539e-11	7.71561e-10
GO:0007169	transmembrane receptor protein tyrosine kinase signaling pathway	18	67	8.14103	1.6026e-11	1.00013e-09
GO:0006874	cellular calcium ion homeostasis	19	76	7.57568	1.65805e-11	1.01749e-09
GO:0006631	fatty acid metabolic process	25	139	5.45013	2.05651e-11	1.24132e-09
GO:0007204	elevation of cytosolic calcium ion concentration	24	128	5.68176	2.15403e-11	1.27922e-09
GO:0007626	locomotory behavior	20	88	6.88698	3.06846e-11	1.79334e-09
GO:0006355	regulation of transcription, DNA-dependent	119	1852	1.9471	3.14764e-11	1.81088e-09
GO:0010976	positive regulation of neuron projection development	18	70	7.79213	3.61328e-11	2.04679e-09
GO:0008283	cell proliferation	28	179	4.74009	3.76903e-11	2.10266e-09
GO:0070588	calcium ion transmembrane transport	20	89	6.8096	3.83526e-11	2.10768e-09
GO:0006184	GTP catabolic process	26	155	5.08304	4.06009e-11	2.19842e-09
GO:0051607	defense response to virus	23	121	5.76002	4.41541e-11	2.33111e-09
GO:0006887	exocytosis	19	80	7.19689	4.43176e-11	2.33111e-09
GO:0051260	protein homooligomerization	26	158	4.98652	6.35488e-11	3.29559e-09
GO:0030593	neutrophil chemotaxis	13	33	11.9374	6.54344e-11	3.34624e-09
GO:0001666	response to hypoxia	21	102	6.23879	6.99516e-11	3.52144e-09
GO:0007229	integrin-mediated signaling pathway	19	82	7.02136	7.07731e-11	3.52144e-09
GO:0035725	sodium ion transmembrane transport	17	64	8.04916	7.71429e-11	3.7872e-09
GO:0019228	regulation of action potential in neuron	11	22	15.1514	9.91687e-11	4.80446e-09
GO:0007409	axonogenesis	20	94	6.44739	1.11666e-10	5.33966e-09
GO:0050728	negative regulation of inflammatory response	16	57	8.50602	1.19837e-10	5.59847e-09
GO:0048169	regulation of long-term neuronal synaptic plasticity	12	28	12.9869	1.20119e-10	5.59847e-09
GO:0030097	hemopoiesis	18	75	7.27265	1.27344e-10	5.86101e-09
GO:0007264	small GTPase mediated signal transduction	30	215	4.22829	1.33973e-10	6.08998e-09
GO:0050731	positive regulation of peptidyl-tyrosine phosphorylation	18	77	7.08375	2.04549e-10	9.18475e-09
GO:0006694	steroid biosynthetic process	16	60	8.08072	2.82007e-10	1.25102e-08
GO:0060079	regulation of excitatory postsynaptic membrane potential	12	30	12.1211	3.21206e-10	1.39563e-08
GO:0042060	wound healing	15	52	8.74117	3.22185e-10	1.39563e-08
GO:0016337	cell-cell adhesion	19	89	6.46912	3.26543e-10	1.39806e-08
GO:0030833	regulation of actin filament polymerization	10	19	15.9488	4.21313e-10	1.78307e-08
GO:0051897	positive regulation of protein kinase B signaling cascade	16	63	7.69593	6.29033e-10	2.63193e-08
GO:0007269	neurotransmitter secretion	10	20	15.1514	8.17529e-10	3.3446e-08
GO:0017157	regulation of exocytosis	10	20	15.1514	8.17529e-10	3.3446e-08
GO:0051092	positive regulation of NF-kappaB transcription factor activity	18	84	6.49344	9.55509e-10	3.8482e-08
GO:0006695	cholesterol biosynthetic process	11	26	12.8204	9.61527e-10	3.8482e-08
GO:0006351	transcription, DNA-dependent	109	1756	1.88098	1.68275e-09	6.62295e-08
GO:0006693	prostaglandin metabolic process	9	16	17.0453	1.69081e-09	6.62295e-08
GO:0006821	chloride transport	17	78	6.60444	2.26548e-09	8.78053e-08
GO:0006814	sodium ion transport	21	122	5.21604	2.35382e-09	9.0279e-08
GO:0051209	release of sequestered calcium ion into cytosol	11	28	11.9046	2.51461e-09	9.54516e-08
GO:0008360	regulation of cell shape	19	101	5.70051	3.22473e-09	1.21158e-07
GO:0006917	induction of apoptosis	24	162	4.48929	3.48916e-09	1.29769e-07
GO:0032760	positive regulation of tumor necrosis factor production	12	36	10.1009	3.8679e-09	1.41006e-07
GO:0045471	response to ethanol	12	36	10.1009	3.8679e-09	1.41006e-07
GO:0043524	negative regulation of neuron apoptotic process	20	114	5.31627	4.23807e-09	1.52986e-07
GO:0007160	cell-matrix adhesion	14	53	8.00449	4.98318e-09	1.78137e-07
GO:0007010	cytoskeleton organization	17	82	6.28227	5.16591e-09	1.82893e-07
GO:0001764	neuron migration	19	104	5.53607	5.41191e-09	1.89778e-07
GO:0007507	heart development	24	167	4.35488	6.53843e-09	2.27118e-07
GO:0006911	phagocytosis, engulfment	9	18	15.1514	6.76824e-09	2.32903e-07
GO:0045893	positive regulation of transcription, DNA-dependent	46	523	2.66525	1.02975e-08	3.51069e-07
GO:0048168	regulation of neuronal synaptic plasticity	9	19	14.3539	1.24805e-08	4.21588e-07
GO:0050715	positive regulation of cytokine secretion	11	32	10.4166	1.33775e-08	4.47615e-07
GO:0032496	response to lipopolysaccharide	17	87	5.92122	1.34941e-08	4.47615e-07
GO:0042742	defense response to bacterium	21	134	4.74893	1.37592e-08	4.52333e-07
GO:0048661	positive regulation of smooth muscle cell proliferation	14	57	7.44277	1.40964e-08	4.59317e-07
GO:0007612	learning	12	40	9.09081	1.52752e-08	4.93363e-07
GO:0010628	positive regulation of gene expression	25	188	4.02962	1.55134e-08	4.95494e-07
GO:0040008	regulation of growth	15	67	6.78419	1.56103e-08	4.95494e-07
GO:0006812	cation transport	19	111	5.18695	1.68495e-08	5.30256e-07
GO:0050830	defense response to Gram-positive bacterium	13	49	8.0395	1.83196e-08	5.71633e-07
GO:0035249	synaptic transmission, glutamatergic	10	26	11.6549	1.96076e-08	6.06684e-07
GO:0016477	cell migration	20	125	4.84843	2.23322e-08	6.85226e-07
GO:0010033	response to organic substance	13	50	7.87871	2.40068e-08	7.3052e-07
GO:0051291	protein heterooligomerization	16	80	6.06054	2.72728e-08	8.23101e-07
GO:0050806	positive regulation of synaptic transmission	9	21	12.9869	3.74043e-08	1.1197e-06
GO:0006898	receptor-mediated endocytosis	11	35	9.52371	3.9488e-08	1.17254e-06
GO:0016525	negative regulation of angiogenesis	13	55	7.16246	8.41947e-08	2.48004e-06
GO:0050896	response to stimulus	9	1142	0.238813	8.89481e-08	2.59926e-06
GO:0051899	membrane depolarization	9	23	11.8576	9.79564e-08	2.83997e-06
GO:0045807	positive regulation of endocytosis	8	17	14.2601	1.03306e-07	2.96749e-06
GO:0050766	positive regulation of phagocytosis	11	38	8.77184	1.03967e-07	2.96749e-06
GO:0001701	in utero embryonic development	29	270	3.25474	1.26868e-07	3.5933e-06
GO:0042110	T cell activation	10	31	9.77507	1.408e-07	3.95744e-06
GO:0045860	positive regulation of protein kinase activity	12	48	7.57568	1.49162e-07	4.12943e-06
GO:0048812	neuron projection morphogenesis	12	48	7.57568	1.49162e-07	4.12943e-06
GO:2000379	positive regulation of reactive oxygen species metabolic process	9	24	11.3635	1.52116e-07	4.17979e-06
GO:0042590	antigen processing and presentation of exogenous peptide antigen via MHC class I	5	5	30.3027	1.55761e-07	4.24824e-06
GO:0003333	amino acid transmembrane transport	11	40	8.33325	1.87971e-07	5.08904e-06
GO:0000187	activation of MAPK activity	14	69	6.14838	1.95597e-07	5.25685e-06
GO:0045907	positive regulation of vasoconstriction	10	32	9.4696	1.98719e-07	5.30205e-06
GO:0006950	response to stress	18	116	4.70215	2.07811e-07	5.50474e-06
GO:0032755	positive regulation of interleukin-6 production	11	41	8.13	2.49214e-07	6.55433e-06
GO:0006909	phagocytosis	10	33	9.18264	2.76655e-07	7.22443e-06
GO:0006919	activation of cysteine-type endopeptidase activity involved in apoptotic process	14	71	5.97518	2.86345e-07	7.4248e-06
GO:0007049	cell cycle	45	565	2.41349	3.13853e-07	8.08117e-06
GO:0001558	regulation of cell growth	11	42	7.93643	3.27553e-07	8.37535e-06
GO:0050808	synapse organization	9	26	10.4894	3.42434e-07	8.69545e-06
GO:0030324	lung development	17	108	4.76987	3.90684e-07	9.85273e-06
GO:0007214	gamma-aminobutyric acid signaling pathway	8	20	12.1211	4.89916e-07	1.22712e-05
GO:0018105	peptidyl-serine phosphorylation	14	74	5.73295	4.94552e-07	1.23036e-05
GO:0042127	regulation of cell proliferation	19	136	4.23347	5.0123e-07	1.23861e-05
GO:0010466	negative regulation of peptidase activity	18	123	4.43454	5.213e-07	1.27962e-05
GO:0008542	visual learning	11	44	7.57568	5.5232e-07	1.34678e-05
GO:0043086	negative regulation of catalytic activity	14	75	5.65651	5.89616e-07	1.42827e-05
GO:0001933	negative regulation of protein phosphorylation	11	45	7.40733	7.09179e-07	1.70494e-05
GO:0006665	sphingolipid metabolic process	9	28	9.74016	7.13092e-07	1.70494e-05
GO:0007159	leukocyte cell-cell adhesion	8	21	11.5439	7.68385e-07	1.82529e-05
GO:0048705	skeletal system morphogenesis	11	46	7.2463	9.04231e-07	2.13422e-05
GO:0001974	blood vessel remodeling	10	37	8.18992	9.2298e-07	2.16459e-05
GO:0000226	microtubule cytoskeleton organization	12	56	6.49344	9.36539e-07	2.18249e-05
GO:0045956	positive regulation of calcium ion-dependent exocytosis	6	10	18.1816	9.60397e-07	2.21011e-05
GO:0060080	regulation of inhibitory postsynaptic membrane potential	6	10	18.1816	9.60397e-07	2.21011e-05
GO:0009968	negative regulation of signal transduction	11	47	7.09212	1.14528e-06	2.60304e-05
GO:0034097	response to cytokine stimulus	11	47	7.09212	1.14528e-06	2.60304e-05
GO:0043410	positive regulation of MAPK cascade	14	79	5.3701	1.15691e-06	2.61333e-05
GO:0035458	cellular response to interferon-beta	8	22	11.0192	1.17236e-06	2.61613e-05
GO:0050804	regulation of synaptic transmission	8	22	11.0192	1.17236e-06	2.61613e-05
GO:0005975	carbohydrate metabolic process	22	188	3.54606	1.28322e-06	2.84627e-05
GO:0007608	sensory perception of smell	11	1141	0.292138	1.50737e-06	3.32344e-05
GO:0050729	positive regulation of inflammatory response	10	39	7.76993	1.58618e-06	3.47637e-05
GO:0006869	lipid transport	12	59	6.16326	1.71355e-06	3.73331e-05
GO:0050905	neuromuscular process	8	23	10.5401	1.74537e-06	3.78026e-05
GO:0007200	phospholipase C-activating G-protein coupled receptor signaling pathway	9	31	8.79756	1.90325e-06	4.09811e-05
GO:0007611	learning or memory	10	40	7.57568	2.05224e-06	4.29587e-05
GO:0031532	actin cytoskeleton reorganization	10	40	7.57568	2.05224e-06	4.29587e-05
GO:0014059	regulation of dopamine secretion	6	11	16.5288	2.05343e-06	4.29587e-05
GO:0045576	mast cell activation	6	11	16.5288	2.05343e-06	4.29587e-05
GO:0060402	calcium ion transport into cytosol	6	11	16.5288	2.05343e-06	4.29587e-05
GO:0045665	negative regulation of neuron differentiation	12	60	6.06054	2.07766e-06	4.322e-05
GO:0007218	neuropeptide signaling pathway	15	96	4.7348	2.40856e-06	4.9822e-05
GO:0007156	homophilic cell adhesion	13	72	5.47132	2.44272e-06	5.01465e-05
GO:0030574	collagen catabolic process	7	17	12.4776	2.45149e-06	5.01465e-05
GO:0050679	positive regulation of epithelial cell proliferation	12	61	5.96119	2.50887e-06	5.10368e-05
GO:0042832	defense response to protozoan	8	24	10.1009	2.542e-06	5.14265e-05
GO:0045429	positive regulation of nitric oxide biosynthetic process	9	32	8.52264	2.57024e-06	5.17138e-05
GO:0045740	positive regulation of DNA replication	10	41	7.39091	2.63387e-06	5.2706e-05
GO:0007154	cell communication	14	85	4.99104	2.93757e-06	5.84655e-05
GO:0006200	ATP catabolic process	16	111	4.36796	3.15482e-06	6.24519e-05
GO:0051592	response to calcium ion	10	42	7.21493	3.35459e-06	6.60514e-05
GO:0007616	long-term memory	8	25	9.69687	3.62967e-06	7.10875e-05
GO:0018149	peptide cross-linking	7	18	11.7844	3.89664e-06	7.59122e-05
GO:0002224	toll-like receptor signaling pathway	6	12	15.1514	3.99139e-06	7.7349e-05
GO:0007015	actin filament organization	10	43	7.04714	4.24174e-06	8.17701e-05
GO:0007254	JNK cascade	9	34	8.02131	4.52835e-06	8.59453e-05
GO:0016358	dendrite development	9	34	8.02131	4.52835e-06	8.59453e-05
GO:0043407	negative regulation of MAP kinase activity	9	34	8.02131	4.52835e-06	8.59453e-05
GO:0051450	myoblast proliferation	4	4	30.3027	4.72953e-06	8.93032e-05
GO:0006461	protein complex assembly	11	54	6.17278	5.09214e-06	9.51739e-05
GO:0048839	inner ear development	11	54	6.17278	5.09214e-06	9.51739e-05
GO:0000165	MAPK cascade	12	65	5.59435	5.13562e-06	9.55018e-05
GO:0043542	endothelial cell migration	7	19	11.1642	5.99306e-06	0.000110887
GO:0016192	vesicle-mediated transport	21	190	3.34925	6.02963e-06	0.000111005
GO:0007243	intracellular protein kinase cascade	13	78	5.05045	6.32198e-06	0.000115809
GO:0050829	defense response to Gram-negative bacterium	8	27	8.97858	7.02419e-06	0.00012678
GO:0050853	B cell receptor signaling pathway	8	27	8.97858	7.02419e-06	0.00012678
GO:0051928	positive regulation of calcium ion transport	8	27	8.97858	7.02419e-06	0.00012678
GO:0002755	MyD88-dependent toll-like receptor signaling pathway	6	13	13.9859	7.2043e-06	0.000128768
GO:0048488	synaptic vesicle endocytosis	6	13	13.9859	7.2043e-06	0.000128768
GO:0043123	positive regulation of I-kappaB kinase/NF-kappaB cascade	15	105	4.32896	7.76434e-06	0.000138108
GO:0002523	leukocyte migration involved in inflammatory response	5	8	18.9392	8.02486e-06	0.000140036
GO:0006013	mannose metabolic process	5	8	18.9392	8.02486e-06	0.000140036
GO:0019800	peptide cross-linking via chondroitin 4-sulfate glycosaminoglycan	5	8	18.9392	8.02486e-06	0.000140036
GO:0032229	negative regulation of synaptic transmission, GABAergic	5	8	18.9392	8.02486e-06	0.000140036
GO:0016064	immunoglobulin mediated immune response	7	20	10.6059	8.9563e-06	0.000155552
GO:0031623	receptor internalization	8	28	8.65792	9.54863e-06	0.00016429
GO:0051930	regulation of sensory perception of pain	8	28	8.65792	9.54863e-06	0.00016429
GO:0016049	cell growth	9	37	7.37093	9.82283e-06	0.000167443
GO:0023014	signal transduction by phosphorylation	9	37	7.37093	9.82283e-06	0.000167443
GO:0007271	synaptic transmission, cholinergic	6	14	12.9869	1.22535e-05	0.000204151
GO:0010524	positive regulation of calcium ion transport into cytosol	6	14	12.9869	1.22535e-05	0.000204151
GO:0016079	synaptic vesicle exocytosis	6	14	12.9869	1.22535e-05	0.000204151
GO:0019886	antigen processing and presentation of exogenous peptide antigen via MHC class II	6	14	12.9869	1.22535e-05	0.000204151
GO:0046328	regulation of JNK cascade	6	14	12.9869	1.22535e-05	0.000204151
GO:0048286	lung alveolus development	9	38	7.17696	1.24941e-05	0.000207221
GO:0018108	peptidyl-tyrosine phosphorylation	11	59	5.64966	1.27994e-05	0.000209528
GO:0009725	response to hormone stimulus	8	29	8.35937	1.28039e-05	0.000209528
GO:0043523	regulation of neuron apoptotic process	8	29	8.35937	1.28039e-05	0.000209528
GO:0007585	respiratory gaseous exchange	7	21	10.1009	1.30503e-05	0.000212615
GO:0008306	associative learning	8	30	8.08072	1.69538e-05	0.000274995
GO:0008088	axon cargo transport	5	9	16.8348	1.75618e-05	0.000278718
GO:0030212	hyaluronan metabolic process	5	9	16.8348	1.75618e-05	0.000278718
GO:0043568	positive regulation of insulin-like growth factor receptor signaling pathway	5	9	16.8348	1.75618e-05	0.000278718
GO:0048172	regulation of short-term neuronal synaptic plasticity	5	9	16.8348	1.75618e-05	0.000278718
GO:0051967	negative regulation of synaptic transmission, glutamatergic	5	9	16.8348	1.75618e-05	0.000278718
GO:0001934	positive regulation of protein phosphorylation	15	112	4.0584	1.76495e-05	0.000278908
GO:0050885	neuromuscular process controlling balance	10	50	6.06054	1.84191e-05	0.000289825
GO:0050776	regulation of immune response	7	22	9.64177	1.85933e-05	0.000290087
GO:0051965	positive regulation of synapse assembly	7	22	9.64177	1.85933e-05	0.000290087
GO:0008299	isoprenoid biosynthetic process	6	15	12.1211	1.98493e-05	0.000305796
GO:0035094	response to nicotine	6	15	12.1211	1.98493e-05	0.000305796
GO:0042220	response to cocaine	6	15	12.1211	1.98493e-05	0.000305796
GO:0001503	ossification	12	74	4.91395	2.12816e-05	0.000326496
GO:0014054	positive regulation of gamma-aminobutyric acid secretion	4	5	24.2422	2.30246e-05	0.000348875
GO:0060055	angiogenesis involved in wound healing	4	5	24.2422	2.30246e-05	0.000348875
GO:2000300	regulation of synaptic vesicle exocytosis	4	5	24.2422	2.30246e-05	0.000348875
GO:0001501	skeletal system development	13	88	4.47654	2.53625e-05	0.000382724
GO:0033344	cholesterol efflux	7	23	9.22257	2.59642e-05	0.000390205
GO:0008219	cell death	10	52	5.82744	2.67161e-05	0.000399873
GO:0010942	positive regulation of cell death	8	32	7.57568	2.87283e-05	0.000428249
GO:0006865	amino acid transport	9	42	6.49344	3.0345e-05	0.000447467
GO:0048146	positive regulation of fibroblast proliferation	9	42	6.49344	3.0345e-05	0.000447467
GO:0010460	positive regulation of heart rate	6	16	11.3635	3.08681e-05	0.000447467
GO:0010575	positive regulation vascular endothelial growth factor production	6	16	11.3635	3.08681e-05	0.000447467
GO:0033198	response to ATP	6	16	11.3635	3.08681e-05	0.000447467
GO:0050877	neurological system process	6	16	11.3635	3.08681e-05	0.000447467
GO:2000311	regulation of alpha-amino-3-hydroxy-5-methyl-4-isoxazole propionate selective glutamate receptor activity	6	16	11.3635	3.08681e-05	0.000447467
GO:0001822	kidney development	13	90	4.37706	3.26601e-05	0.000471586
GO:0001937	negative regulation of endothelial cell proliferation	7	24	8.83829	3.56087e-05	0.000502342
GO:0006928	cellular component movement	7	24	8.83829	3.56087e-05	0.000502342
GO:0007568	aging	7	24	8.83829	3.56087e-05	0.000502342
GO:0009617	response to bacterium	7	24	8.83829	3.56087e-05	0.000502342
GO:0042474	middle ear morphogenesis	7	24	8.83829	3.56087e-05	0.000502342
GO:0045071	negative regulation of viral genome replication	7	24	8.83829	3.56087e-05	0.000502342
GO:0019882	antigen processing and presentation	8	33	7.34611	3.68237e-05	0.000515531
GO:0045786	negative regulation of cell cycle	8	33	7.34611	3.68237e-05	0.000515531
GO:0001508	regulation of action potential	6	17	10.6951	4.63681e-05	0.000637043
GO:0001964	startle response	6	17	10.6951	4.63681e-05	0.000637043
GO:0002028	regulation of sodium ion transport	6	17	10.6951	4.63681e-05	0.000637043
GO:0019933	cAMP-mediated signaling	6	17	10.6951	4.63681e-05	0.000637043
GO:0030866	cortical actin cytoskeleton organization	6	17	10.6951	4.63681e-05	0.000637043
GO:0048015	phosphatidylinositol-mediated signaling	7	25	8.48476	4.8045e-05	0.000657627
GO:0051726	regulation of cell cycle	13	94	4.1908	5.29892e-05	0.000722616
GO:0060021	palate development	11	68	4.90191	5.34352e-05	0.000726009
GO:0042102	positive regulation of T cell proliferation	9	45	6.06054	5.51693e-05	0.000746813
GO:0007413	axonal fasciculation	5	11	13.774	6.09214e-05	0.000803988
GO:0010243	response to organic nitrogen	5	11	13.774	6.09214e-05	0.000803988
GO:0010952	positive regulation of peptidase activity	5	11	13.774	6.09214e-05	0.000803988
GO:0042535	positive regulation of tumor necrosis factor biosynthetic process	5	11	13.774	6.09214e-05	0.000803988
GO:0043278	response to morphine	5	11	13.774	6.09214e-05	0.000803988
GO:0050884	neuromuscular process controlling posture	5	11	13.774	6.09214e-05	0.000803988
GO:0070208	protein heterotrimerization	5	11	13.774	6.09214e-05	0.000803988
GO:0043085	positive regulation of catalytic activity	10	57	5.31627	6.27855e-05	0.000825629
GO:0016188	synaptic vesicle maturation	4	6	20.2018	6.72559e-05	0.000864297
GO:0032308	positive regulation of prostaglandin secretion	4	6	20.2018	6.72559e-05	0.000864297
GO:0036120	cellular response to platelet-derived growth factor stimulus	4	6	20.2018	6.72559e-05	0.000864297
GO:0042698	ovulation cycle	4	6	20.2018	6.72559e-05	0.000864297
GO:0051901	positive regulation of mitochondrial depolarization	4	6	20.2018	6.72559e-05	0.000864297
GO:0001916	positive regulation of T cell mediated cytotoxicity	6	18	10.1009	6.76039e-05	0.000864297
GO:0034341	response to interferon-gamma	6	18	10.1009	6.76039e-05	0.000864297
GO:0051480	cytosolic calcium ion homeostasis	6	18	10.1009	6.76039e-05	0.000864297
GO:0001889	liver development	10	58	5.22461	7.36298e-05	0.000934845
GO:0007018	microtubule-based movement	10	58	5.22461	7.36298e-05	0.000934845
GO:0034446	substrate adhesion-dependent cell spreading	7	27	7.85626	8.37663e-05	0.00105989
GO:0015807	L-amino acid transport	6	19	9.56928	9.60397e-05	0.00120689
GO:2001238	positive regulation of extrinsic apoptotic signaling pathway	6	19	9.56928	9.60397e-05	0.00120689
GO:0030595	leukocyte chemotaxis	5	12	12.6261	0.000101586	0.00125097
GO:0032695	negative regulation of interleukin-12 production	5	12	12.6261	0.000101586	0.00125097
GO:0035307	positive regulation of protein dephosphorylation	5	12	12.6261	0.000101586	0.00125097
GO:0045019	negative regulation of nitric oxide biosynthetic process	5	12	12.6261	0.000101586	0.00125097
GO:0071526	semaphorin-plexin signaling pathway	5	12	12.6261	0.000101586	0.00125097
GO:2000463	positive regulation of excitatory postsynaptic membrane potential	5	12	12.6261	0.000101586	0.00125097
GO:0009636	response to toxic substance	9	49	5.5658	0.0001136	0.00138962
GO:0051259	protein oligomerization	9	49	5.5658	0.0001136	0.00138962
GO:0033209	tumor necrosis factor-mediated signaling pathway	6	20	9.09081	0.000133361	0.00162058
GO:0071902	positive regulation of protein serine/threonine kinase activity	6	20	9.09081	0.000133361	0.00162058
GO:0007162	negative regulation of cell adhesion	7	29	7.31445	0.000138956	0.00166116
GO:0048008	platelet-derived growth factor receptor signaling pathway	7	29	7.31445	0.000138956	0.00166116
GO:0048013	ephrin receptor signaling pathway	7	29	7.31445	0.000138956	0.00166116
GO:0048701	embryonic cranial skeleton morphogenesis	7	29	7.31445	0.000138956	0.00166116
GO:0071310	cellular response to organic substance	7	29	7.31445	0.000138956	0.00166116
GO:0001805	positive regulation of type III hypersensitivity	3	3	30.3027	0.000143535	0.00166718
GO:0002283	neutrophil activation involved in immune response	3	3	30.3027	0.000143535	0.00166718
GO:0007208	phospholipase C-activating serotonin receptor signaling pathway	3	3	30.3027	0.000143535	0.00166718
GO:0014012	peripheral nervous system axon regeneration	3	3	30.3027	0.000143535	0.00166718
GO:0034154	toll-like receptor 7 signaling pathway	3	3	30.3027	0.000143535	0.00166718
GO:0034436	glycoprotein transport	3	3	30.3027	0.000143535	0.00166718
GO:0048002	antigen processing and presentation of peptide antigen	3	3	30.3027	0.000143535	0.00166718
GO:0051250	negative regulation of lymphocyte activation	3	3	30.3027	0.000143535	0.00166718
GO:1900482	positive regulation of diacylglycerol biosynthetic process	3	3	30.3027	0.000143535	0.00166718
GO:0000160	phosphorelay signal transduction system	4	7	17.3158	0.000152805	0.00172058
GO:0001919	regulation of receptor recycling	4	7	17.3158	0.000152805	0.00172058
GO:0010738	regulation of protein kinase A signaling cascade	4	7	17.3158	0.000152805	0.00172058
GO:0032026	response to magnesium ion	4	7	17.3158	0.000152805	0.00172058
GO:0042761	very long-chain fatty acid biosynthetic process	4	7	17.3158	0.000152805	0.00172058
GO:0045730	respiratory burst	4	7	17.3158	0.000152805	0.00172058
GO:0050688	regulation of defense response to virus	4	7	17.3158	0.000152805	0.00172058
GO:0050798	activated T cell proliferation	4	7	17.3158	0.000152805	0.00172058
GO:0051932	synaptic transmission, GABAergic	4	7	17.3158	0.000152805	0.00172058
GO:0090197	positive regulation of chemokine secretion	4	7	17.3158	0.000152805	0.00172058
GO:0000122	negative regulation of transcription from RNA polymerase II promoter	38	561	2.05259	0.000155128	0.00174141
GO:0030334	regulation of cell migration	9	51	5.34754	0.000158549	0.00176902
GO:0046330	positive regulation of JNK cascade	9	51	5.34754	0.000158549	0.00176902
GO:0006910	phagocytosis, recognition	5	13	11.6549	0.000160574	0.00177548
GO:0042417	dopamine metabolic process	5	13	11.6549	0.000160574	0.00177548
GO:0048268	clathrin coat assembly	5	13	11.6549	0.000160574	0.00177548
GO:0007528	neuromuscular junction development	7	30	7.07063	0.000176087	0.00192962
GO:0030838	positive regulation of actin filament polymerization	7	30	7.07063	0.000176087	0.00192962
GO:0032956	regulation of actin cytoskeleton organization	7	30	7.07063	0.000176087	0.00192962
GO:0032715	negative regulation of interleukin-6 production	6	21	8.65792	0.000181485	0.00197118
GO:0045453	bone resorption	6	21	8.65792	0.000181485	0.00197118
GO:0070371	ERK1 and ERK2 cascade	6	21	8.65792	0.000181485	0.00197118
GO:0008344	adult locomotory behavior	9	53	5.14574	0.00021768	0.00235043
GO:0033138	positive regulation of peptidyl-serine phosphorylation	9	53	5.14574	0.00021768	0.00235043
GO:0030879	mammary gland development	7	31	6.84255	0.000220974	0.0023652
GO:0032720	negative regulation of tumor necrosis factor production	7	31	6.84255	0.000220974	0.0023652
GO:0042327	positive regulation of phosphorylation	7	31	6.84255	0.000220974	0.0023652
GO:0009791	post-embryonic development	12	93	3.91003	0.000227154	0.00242429
GO:0001570	vasculogenesis	10	66	4.59132	0.000234425	0.00249467
GO:0030534	adult behavior	6	22	8.26438	0.00024257	0.00250597
GO:0042221	response to chemical stimulus	6	22	8.26438	0.00024257	0.00250597
GO:0048010	vascular endothelial growth factor receptor signaling pathway	6	22	8.26438	0.00024257	0.00250597
GO:0006661	phosphatidylinositol biosynthetic process	5	14	10.8224	0.000242974	0.00250597
GO:0006826	iron ion transport	5	14	10.8224	0.000242974	0.00250597
GO:0006939	smooth muscle contraction	5	14	10.8224	0.000242974	0.00250597
GO:0007212	dopamine receptor signaling pathway	5	14	10.8224	0.000242974	0.00250597
GO:0014032	neural crest cell development	5	14	10.8224	0.000242974	0.00250597
GO:0021702	cerebellar Purkinje cell differentiation	5	14	10.8224	0.000242974	0.00250597
GO:0050732	negative regulation of peptidyl-tyrosine phosphorylation	5	14	10.8224	0.000242974	0.00250597
GO:0070527	platelet aggregation	5	14	10.8224	0.000242974	0.00250597
GO:0008217	regulation of blood pressure	9	54	5.05045	0.000253603	0.00260829
GO:0043154	negative regulation of cysteine-type endopeptidase activity involved in apoptotic process	10	67	4.52279	0.000267454	0.00274308
GO:0000186	activation of MAPKK activity	7	32	6.62872	0.000274803	0.00280284
GO:0048167	regulation of synaptic plasticity	7	32	6.62872	0.000274803	0.00280284
GO:0051781	positive regulation of cell division	8	43	5.63771	0.000286898	0.00290639
GO:0001960	negative regulation of cytokine-mediated signaling pathway	4	8	15.1514	0.000297585	0.00290639
GO:0002675	positive regulation of acute inflammatory response	4	8	15.1514	0.000297585	0.00290639
GO:0032494	response to peptidoglycan	4	8	15.1514	0.000297585	0.00290639
GO:0032940	secretion by cell	4	8	15.1514	0.000297585	0.00290639
GO:0032963	collagen metabolic process	4	8	15.1514	0.000297585	0.00290639
GO:0033089	positive regulation of T cell differentiation in thymus	4	8	15.1514	0.000297585	0.00290639
GO:0035455	response to interferon-alpha	4	8	15.1514	0.000297585	0.00290639
GO:0040011	locomotion	4	8	15.1514	0.000297585	0.00290639
GO:0042136	neurotransmitter biosynthetic process	4	8	15.1514	0.000297585	0.00290639
GO:0043534	blood vessel endothelial cell migration	4	8	15.1514	0.000297585	0.00290639
GO:0045104	intermediate filament cytoskeleton organization	4	8	15.1514	0.000297585	0.00290639
GO:0050777	negative regulation of immune response	4	8	15.1514	0.000297585	0.00290639
GO:0050921	positive regulation of chemotaxis	4	8	15.1514	0.000297585	0.00290639
GO:0070507	regulation of microtubule cytoskeleton organization	4	8	15.1514	0.000297585	0.00290639
GO:0097202	activation of cysteine-type endopeptidase activity	4	8	15.1514	0.000297585	0.00290639
GO:0001836	release of cytochrome c from mitochondria	6	23	7.90506	0.000319019	0.00310748
GO:0030217	T cell differentiation	7	33	6.42785	0.000338875	0.00328247
GO:0043280	positive regulation of cysteine-type endopeptidase activity involved in apoptotic process	7	33	6.42785	0.000338875	0.00328247
GO:0007517	muscle organ development	9	56	4.87008	0.000340546	0.00328247
GO:0043406	positive regulation of MAP kinase activity	8	44	5.50958	0.00034055	0.00328247
GO:0007605	sensory perception of sound	13	112	3.51728	0.000345669	0.00332312
GO:0006171	cAMP biosynthetic process	5	15	10.1009	0.000354537	0.00337314
GO:0018208	peptidyl-proline modification	5	15	10.1009	0.000354537	0.00337314
GO:0032722	positive regulation of chemokine production	5	15	10.1009	0.000354537	0.00337314
GO:0048566	embryonic digestive tract development	5	15	10.1009	0.000354537	0.00337314
GO:0007050	cell cycle arrest	11	83	4.01602	0.000358302	0.00339143
GO:0010951	negative regulation of endopeptidase activity	11	83	4.01602	0.000358302	0.00339143
GO:0006334	nucleosome assembly	9	57	4.78464	0.000392626	0.00370679
GO:0014068	positive regulation of phosphatidylinositol 3-kinase cascade	8	45	5.38715	0.000402254	0.00378798
GO:0001662	behavioral fear response	6	24	7.57568	0.000413489	0.00385435
GO:0031214	biomineral tissue development	6	24	7.57568	0.000413489	0.00385435
GO:0045862	positive regulation of proteolysis	6	24	7.57568	0.000413489	0.00385435
GO:0060326	cell chemotaxis	6	24	7.57568	0.000413489	0.00385435
GO:0030155	regulation of cell adhesion	7	34	6.23879	0.000414608	0.00385502
GO:0007519	skeletal muscle tissue development	8	46	5.27004	0.000472921	0.00437512
GO:0009058	biosynthetic process	8	46	5.27004	0.000472921	0.00437512
GO:0071230	cellular response to amino acid stimulus	13	116	3.39599	0.000495817	0.00457543
GO:0001516	prostaglandin biosynthetic process	5	16	9.4696	0.000501659	0.0045834
GO:0007274	neuromuscular synaptic transmission	5	16	9.4696	0.000501659	0.0045834
GO:0048266	behavioral response to pain	5	16	9.4696	0.000501659	0.0045834
GO:0070372	regulation of ERK1 and ERK2 cascade	5	16	9.4696	0.000501659	0.0045834
GO:0006749	glutathione metabolic process	7	35	6.06054	0.000503544	0.00458923
GO:0001817	regulation of cytokine production	4	9	13.4679	0.000521604	0.00467286
GO:0010759	positive regulation of macrophage chemotaxis	4	9	13.4679	0.000521604	0.00467286
GO:0035095	behavioral response to nicotine	4	9	13.4679	0.000521604	0.00467286
GO:0051856	adhesion to symbiont	4	9	13.4679	0.000521604	0.00467286
GO:0051926	negative regulation of calcium ion transport	4	9	13.4679	0.000521604	0.00467286
GO:0060052	neurofilament cytoskeleton organization	4	9	13.4679	0.000521604	0.00467286
GO:1900006	positive regulation of dendrite development	4	9	13.4679	0.000521604	0.00467286
GO:0002175	protein localization to paranode region of axon	3	4	22.727	0.000559951	0.00483976
GO:0002238	response to molecule of fungal origin	3	4	22.727	0.000559951	0.00483976
GO:0006907	pinocytosis	3	4	22.727	0.000559951	0.00483976
GO:0007258	JUN phosphorylation	3	4	22.727	0.000559951	0.00483976
GO:0010543	regulation of platelet activation	3	4	22.727	0.000559951	0.00483976
GO:0010638	positive regulation of organelle organization	3	4	22.727	0.000559951	0.00483976
GO:0031133	regulation of axon diameter	3	4	22.727	0.000559951	0.00483976
GO:0032611	interleukin-1 beta production	3	4	22.727	0.000559951	0.00483976
GO:0033602	negative regulation of dopamine secretion	3	4	22.727	0.000559951	0.00483976
GO:0033632	regulation of cell-cell adhesion mediated by integrin	3	4	22.727	0.000559951	0.00483976
GO:0033687	osteoblast proliferation	3	4	22.727	0.000559951	0.00483976
GO:0040038	polar body extrusion after meiotic divisions	3	4	22.727	0.000559951	0.00483976
GO:0043949	regulation of cAMP-mediated signaling	3	4	22.727	0.000559951	0.00483976
GO:0048592	eye morphogenesis	3	4	22.727	0.000559951	0.00483976
GO:0051295	establishment of meiotic spindle localization	3	4	22.727	0.000559951	0.00483976
GO:0007492	endoderm development	7	36	5.89219	0.00060735	0.00521273
GO:0045785	positive regulation of cell adhesion	7	36	5.89219	0.00060735	0.00521273
GO:0048754	branching morphogenesis of an epithelial tube	7	36	5.89219	0.00060735	0.00521273
GO:0009887	organ morphogenesis	12	103	3.53041	0.000616484	0.00527883
GO:0007067	mitosis	20	241	2.51475	0.000667809	0.00569687
GO:0021549	cerebellum development	6	26	6.99293	0.0006684	0.00569687
GO:0001568	blood vessel development	9	61	4.47089	0.000672555	0.00571905
GO:0046928	regulation of neurotransmitter secretion	5	17	8.91256	0.000691364	0.00586544
GO:0048538	thymus development	7	37	5.73295	0.000727818	0.00616052
GO:0042552	myelination	8	49	4.94738	0.000748846	0.00632397
GO:0051216	cartilage development	10	76	3.9872	0.000787383	0.00663419
GO:0035176	social behavior	6	27	6.73394	0.000835438	0.00695771
GO:0042130	negative regulation of T cell proliferation	6	27	6.73394	0.000835438	0.00695771
GO:0042771	intrinsic apoptotic signaling pathway in response to DNA damage by p53 class mediator	6	27	6.73394	0.000835438	0.00695771
GO:0010763	positive regulation of fibroblast migration	4	10	12.1211	0.000846565	0.00695771
GO:0031115	negative regulation of microtubule polymerization	4	10	12.1211	0.000846565	0.00695771
GO:0033628	regulation of cell adhesion mediated by integrin	4	10	12.1211	0.000846565	0.00695771
GO:0048246	macrophage chemotaxis	4	10	12.1211	0.000846565	0.00695771
GO:0050707	regulation of cytokine secretion	4	10	12.1211	0.000846565	0.00695771
GO:0051966	regulation of synaptic transmission, glutamatergic	4	10	12.1211	0.000846565	0.00695771
GO:0060674	placenta blood vessel development	4	10	12.1211	0.000846565	0.00695771
GO:2000310	regulation of N-methyl-D-aspartate selective glutamate receptor activity	4	10	12.1211	0.000846565	0.00695771
GO:0007179	transforming growth factor beta receptor signaling pathway	9	63	4.32896	0.000865334	0.00708036
GO:0007267	cell-cell signaling	9	63	4.32896	0.000865334	0.00708036
GO:0048814	regulation of dendrite morphogenesis	5	18	8.41742	0.000931272	0.00758616
GO:0050890	cognition	5	18	8.41742	0.000931272	0.00758616
GO:0000902	cell morphogenesis	9	64	4.26132	0.000977699	0.00794678
GO:0000910	cytokinesis	8	51	4.75337	0.000997459	0.00808953
GO:0007205	protein kinase C-activating G-protein coupled receptor signaling pathway	6	28	6.49344	0.00103369	0.00832834
GO:0007257	activation of JUN kinase activity	6	28	6.49344	0.00103369	0.00832834
GO:0045600	positive regulation of fat cell differentiation	6	28	6.49344	0.00103369	0.00832834
GO:0009190	cyclic nucleotide biosynthetic process	5	19	7.9744	0.00122957	0.00971518
GO:0030261	chromosome condensation	5	19	7.9744	0.00122957	0.00971518
GO:0030301	cholesterol transport	5	19	7.9744	0.00122957	0.00971518
GO:0030500	regulation of bone mineralization	5	19	7.9744	0.00122957	0.00971518
GO:0032728	positive regulation of interferon-beta production	5	19	7.9744	0.00122957	0.00971518
GO:0034612	response to tumor necrosis factor	5	19	7.9744	0.00122957	0.00971518
GO:0044130	negative regulation of growth of symbiont in host	5	19	7.9744	0.00122957	0.00971518
GO:0045184	establishment of protein localization	5	19	7.9744	0.00122957	0.00971518
GO:0051968	positive regulation of synaptic transmission, glutamatergic	5	19	7.9744	0.00122957	0.00971518
GO:0042113	B cell activation	6	29	6.26953	0.0012671	0.00994769
GO:0045840	positive regulation of mitosis	6	29	6.26953	0.0012671	0.00994769
GO:0097190	apoptotic signaling pathway	6	29	6.26953	0.0012671	0.00994769
GO:0006612	protein targeting to membrane	4	11	11.0192	0.0012955	0.0100001
GO:0008210	estrogen metabolic process	4	11	11.0192	0.0012955	0.0100001
GO:0008347	glial cell migration	4	11	11.0192	0.0012955	0.0100001
GO:0015813	L-glutamate transport	4	11	11.0192	0.0012955	0.0100001
GO:0016486	peptide hormone processing	4	11	11.0192	0.0012955	0.0100001
GO:0060068	vagina development	4	11	11.0192	0.0012955	0.0100001
GO:0060081	membrane hyperpolarization	4	11	11.0192	0.0012955	0.0100001
GO:0060740	prostate gland epithelium morphogenesis	4	11	11.0192	0.0012955	0.0100001
GO:0001821	histamine secretion	3	5	18.1816	0.00136534	0.0101971
GO:0002686	negative regulation of leukocyte migration	3	5	18.1816	0.00136534	0.0101971
GO:0016125	sterol metabolic process	3	5	18.1816	0.00136534	0.0101971
GO:0019367	fatty acid elongation, saturated fatty acid	3	5	18.1816	0.00136534	0.0101971
GO:0032367	intracellular cholesterol transport	3	5	18.1816	0.00136534	0.0101971
GO:0045824	negative regulation of innate immune response	3	5	18.1816	0.00136534	0.0101971
GO:0048012	hepatocyte growth factor receptor signaling pathway	3	5	18.1816	0.00136534	0.0101971
GO:0048791	calcium ion-dependent exocytosis of neurotransmitter	3	5	18.1816	0.00136534	0.0101971
GO:0051963	regulation of synapse assembly	3	5	18.1816	0.00136534	0.0101971
GO:0060665	regulation of branching involved in salivary gland morphogenesis by mesenchymal-epithelial signaling	3	5	18.1816	0.00136534	0.0101971
GO:0060742	epithelial cell differentiation involved in prostate gland development	3	5	18.1816	0.00136534	0.0101971
GO:0061351	neural precursor cell proliferation	3	5	18.1816	0.00136534	0.0101971
GO:0070269	pyroptosis	3	5	18.1816	0.00136534	0.0101971
GO:0070723	response to cholesterol	3	5	18.1816	0.00136534	0.0101971
GO:0071313	cellular response to caffeine	3	5	18.1816	0.00136534	0.0101971
GO:2000406	positive regulation of T cell migration	3	5	18.1816	0.00136534	0.0101971
GO:0007005	mitochondrion organization	7	41	5.17363	0.00141675	0.0105597
GO:0016311	dephosphorylation	14	146	2.90574	0.00144404	0.0107413
GO:0016042	lipid catabolic process	11	97	3.43639	0.00145154	0.0107753
GO:0008654	phospholipid biosynthetic process	8	54	4.48929	0.00149351	0.0110646
GO:0007157	heterophilic cell-cell adhesion	6	30	6.06054	0.00153985	0.011385
GO:0006979	response to oxidative stress	11	98	3.40133	0.00158691	0.0116986
GO:0030010	establishment of cell polarity	5	20	7.57568	0.00159497	0.0116986
GO:0032757	positive regulation of interleukin-8 production	5	20	7.57568	0.00159497	0.0116986
GO:0050850	positive regulation of calcium-mediated signaling	5	20	7.57568	0.00159497	0.0116986
GO:0048706	embryonic skeletal system development	7	42	5.05045	0.00165201	0.0120928
GO:0007219	Notch signaling pathway	9	69	3.95253	0.00173659	0.0126617
GO:0042472	inner ear morphogenesis	9	69	3.95253	0.00173659	0.0126617
GO:0001921	positive regulation of receptor recycling	4	12	10.1009	0.00189246	0.0135829
GO:0002237	response to molecule of bacterial origin	4	12	10.1009	0.00189246	0.0135829
GO:0002474	antigen processing and presentation of peptide antigen via MHC class I	4	12	10.1009	0.00189246	0.0135829
GO:0009612	response to mechanical stimulus	4	12	10.1009	0.00189246	0.0135829
GO:0014912	negative regulation of smooth muscle cell migration	4	12	10.1009	0.00189246	0.0135829
GO:0033160	positive regulation of protein import into nucleus, translocation	4	12	10.1009	0.00189246	0.0135829
GO:0045579	positive regulation of B cell differentiation	4	12	10.1009	0.00189246	0.0135829
GO:0050872	white fat cell differentiation	4	12	10.1009	0.00189246	0.0135829
GO:0016485	protein processing	7	43	4.933	0.00191745	0.0137355
GO:0032088	negative regulation of NF-kappaB transcription factor activity	8	56	4.32896	0.0019238	0.0137542
GO:0051301	cell division	24	333	2.18398	0.00202589	0.0144491
GO:0002040	sprouting angiogenesis	5	21	7.21493	0.00203669	0.0144491
GO:0043408	regulation of MAPK cascade	5	21	7.21493	0.00203669	0.0144491
GO:0050918	positive chemotaxis	5	21	7.21493	0.00203669	0.0144491
GO:0007596	blood coagulation	9	71	3.84119	0.00215183	0.0152074
GO:0008104	protein localization	9	71	3.84119	0.00215183	0.0152074
GO:0045669	positive regulation of osteoblast differentiation	8	57	4.25301	0.00217379	0.0153331
GO:0050727	regulation of inflammatory response	6	32	5.68176	0.00222137	0.0156089
GO:0055072	iron ion homeostasis	6	32	5.68176	0.00222137	0.0156089
GO:0008406	gonad development	5	22	6.88698	0.00256437	0.0176063
GO:0030511	positive regulation of transforming growth factor beta receptor signaling pathway	5	22	6.88698	0.00256437	0.0176063
GO:0043552	positive regulation of phosphatidylinositol 3-kinase activity	5	22	6.88698	0.00256437	0.0176063
GO:0048844	artery morphogenesis	5	22	6.88698	0.00256437	0.0176063
GO:0090200	positive regulation of release of cytochrome c from mitochondria	5	22	6.88698	0.00256437	0.0176063
GO:0018107	peptidyl-threonine phosphorylation	6	33	5.50958	0.0026397	0.0176063
GO:0048662	negative regulation of smooth muscle cell proliferation	6	33	5.50958	0.0026397	0.0176063
GO:0001779	natural killer cell differentiation	4	13	9.32391	0.00266219	0.0176063
GO:0006044	N-acetylglucosamine metabolic process	4	13	9.32391	0.00266219	0.0176063
GO:0008209	androgen metabolic process	4	13	9.32391	0.00266219	0.0176063
GO:0010043	response to zinc ion	4	13	9.32391	0.00266219	0.0176063
GO:0017156	calcium ion-dependent exocytosis	4	13	9.32391	0.00266219	0.0176063
GO:0043032	positive regulation of macrophage activation	4	13	9.32391	0.00266219	0.0176063
GO:0043277	apoptotic cell clearance	4	13	9.32391	0.00266219	0.0176063
GO:0048260	positive regulation of receptor-mediated endocytosis	4	13	9.32391	0.00266219	0.0176063
GO:0060384	innervation	4	13	9.32391	0.00266219	0.0176063
GO:0001775	cell activation	3	6	15.1514	0.00266343	0.0176063
GO:0001955	blood vessel maturation	3	6	15.1514	0.00266343	0.0176063
GO:0001956	positive regulation of neurotransmitter secretion	3	6	15.1514	0.00266343	0.0176063
GO:0002281	macrophage activation involved in immune response	3	6	15.1514	0.00266343	0.0176063
GO:0002821	positive regulation of adaptive immune response	3	6	15.1514	0.00266343	0.0176063
GO:0008063	Toll signaling pathway	3	6	15.1514	0.00266343	0.0176063
GO:0010863	positive regulation of phospholipase C activity	3	6	15.1514	0.00266343	0.0176063
GO:0030203	glycosaminoglycan metabolic process	3	6	15.1514	0.00266343	0.0176063
GO:0030214	hyaluronan catabolic process	3	6	15.1514	0.00266343	0.0176063
GO:0030913	paranodal junction assembly	3	6	15.1514	0.00266343	0.0176063
GO:0032964	collagen biosynthetic process	3	6	15.1514	0.00266343	0.0176063
GO:0045110	intermediate filament bundle assembly	3	6	15.1514	0.00266343	0.0176063
GO:0045542	positive regulation of cholesterol biosynthetic process	3	6	15.1514	0.00266343	0.0176063
GO:0048247	lymphocyte chemotaxis	3	6	15.1514	0.00266343	0.0176063
GO:0051346	negative regulation of hydrolase activity	3	6	15.1514	0.00266343	0.0176063
GO:0060315	negative regulation of ryanodine-sensitive calcium-release channel activity	3	6	15.1514	0.00266343	0.0176063
GO:0086002	regulation of cardiac muscle cell action potential involved in contraction	3	6	15.1514	0.00266343	0.0176063
GO:0001649	osteoblast differentiation	7	46	4.61128	0.00292263	0.0192852
GO:0043627	response to estrogen stimulus	6	34	5.34754	0.0031165	0.020491
GO:0060325	face morphogenesis	6	34	5.34754	0.0031165	0.020491
GO:0008045	motor neuron axon guidance	5	23	6.58755	0.00318807	0.02063
GO:0010332	response to gamma radiation	5	23	6.58755	0.00318807	0.02063
GO:0014911	positive regulation of smooth muscle cell migration	5	23	6.58755	0.00318807	0.02063
GO:0030001	metal ion transport	5	23	6.58755	0.00318807	0.02063
GO:0043029	T cell homeostasis	5	23	6.58755	0.00318807	0.02063
GO:0048873	homeostasis of number of cells within a tissue	5	23	6.58755	0.00318807	0.02063
GO:0051017	actin filament bundle assembly	5	23	6.58755	0.00318807	0.02063
GO:0071300	cellular response to retinoic acid	5	23	6.58755	0.00318807	0.02063
GO:0071346	cellular response to interferon-gamma	5	23	6.58755	0.00318807	0.02063
GO:0034613	cellular protein localization	7	47	4.51317	0.00333723	0.0215573
GO:0016567	protein ubiquitination	14	159	2.66816	0.00339215	0.0218737
GO:0002092	positive regulation of receptor internalization	4	14	8.65792	0.00362988	0.0230038
GO:0002230	positive regulation of defense response to virus by host	4	14	8.65792	0.00362988	0.0230038
GO:0006691	leukotriene metabolic process	4	14	8.65792	0.00362988	0.0230038
GO:0007340	acrosome reaction	4	14	8.65792	0.00362988	0.0230038
GO:0009314	response to radiation	4	14	8.65792	0.00362988	0.0230038
GO:0015693	magnesium ion transport	4	14	8.65792	0.00362988	0.0230038
GO:0030502	negative regulation of bone mineralization	4	14	8.65792	0.00362988	0.0230038
GO:0043267	negative regulation of potassium ion transport	4	14	8.65792	0.00362988	0.0230038
GO:0050730	regulation of peptidyl-tyrosine phosphorylation	4	14	8.65792	0.00362988	0.0230038
GO:0071347	cellular response to interleukin-1	4	14	8.65792	0.00362988	0.0230038
GO:0030307	positive regulation of cell growth	9	77	3.54188	0.00390884	0.0244939
GO:0035264	multicellular organism growth	9	77	3.54188	0.00390884	0.0244939
GO:0001816	cytokine production	5	24	6.31307	0.00391823	0.0244939
GO:0007249	I-kappaB kinase/NF-kappaB cascade	5	24	6.31307	0.00391823	0.0244939
GO:0010718	positive regulation of epithelial to mesenchymal transition	5	24	6.31307	0.00391823	0.0244939
GO:0030177	positive regulation of Wnt receptor signaling pathway	5	24	6.31307	0.00391823	0.0244939
GO:0035690	cellular response to drug	5	24	6.31307	0.00391823	0.0244939
GO:0046488	phosphatidylinositol metabolic process	5	24	6.31307	0.00391823	0.0244939
GO:0016055	Wnt receptor signaling pathway	16	200	2.42422	0.00424284	0.0254865
GO:0002053	positive regulation of mesenchymal cell proliferation	6	36	5.05045	0.00426707	0.0254865
GO:0007188	adenylate cyclase-modulating G-protein coupled receptor signaling pathway	6	36	5.05045	0.00426707	0.0254865
GO:0001909	leukocyte mediated cytotoxicity	2	2	30.3027	0.00435389	0.0254865
GO:0002082	regulation of oxidative phosphorylation	2	2	30.3027	0.00435389	0.0254865
GO:0002431	Fc receptor mediated stimulatory signaling pathway	2	2	30.3027	0.00435389	0.0254865
GO:0002576	platelet degranulation	2	2	30.3027	0.00435389	0.0254865
GO:0002693	positive regulation of cellular extravasation	2	2	30.3027	0.00435389	0.0254865
GO:0002752	cell surface pattern recognition receptor signaling pathway	2	2	30.3027	0.00435389	0.0254865
GO:0006680	glucosylceramide catabolic process	2	2	30.3027	0.00435389	0.0254865
GO:0007622	rhythmic behavior	2	2	30.3027	0.00435389	0.0254865
GO:0008292	acetylcholine biosynthetic process	2	2	30.3027	0.00435389	0.0254865
GO:0010716	negative regulation of extracellular matrix disassembly	2	2	30.3027	0.00435389	0.0254865
GO:0014048	regulation of glutamate secretion	2	2	30.3027	0.00435389	0.0254865
GO:0015891	siderophore transport	2	2	30.3027	0.00435389	0.0254865
GO:0021636	trigeminal nerve morphogenesis	2	2	30.3027	0.00435389	0.0254865
GO:0021722	superior olivary nucleus maturation	2	2	30.3027	0.00435389	0.0254865
GO:0032225	regulation of synaptic transmission, dopaminergic	2	2	30.3027	0.00435389	0.0254865
GO:0032796	uropod organization	2	2	30.3027	0.00435389	0.0254865
GO:0033197	response to vitamin E	2	2	30.3027	0.00435389	0.0254865
GO:0035583	sequestering of TGFbeta in extracellular matrix	2	2	30.3027	0.00435389	0.0254865
GO:0038094	Fc-gamma receptor signaling pathway	2	2	30.3027	0.00435389	0.0254865
GO:0042323	negative regulation of circadian sleep/wake cycle, non-REM sleep	2	2	30.3027	0.00435389	0.0254865
GO:0042495	detection of triacyl bacterial lipopeptide	2	2	30.3027	0.00435389	0.0254865
GO:0048298	positive regulation of isotype switching to IgA isotypes	2	2	30.3027	0.00435389	0.0254865
GO:0050855	regulation of B cell receptor signaling pathway	2	2	30.3027	0.00435389	0.0254865
GO:0051270	regulation of cellular component movement	2	2	30.3027	0.00435389	0.0254865
GO:0051586	positive regulation of dopamine uptake involved in synaptic transmission	2	2	30.3027	0.00435389	0.0254865
GO:0060012	synaptic transmission, glycinergic	2	2	30.3027	0.00435389	0.0254865
GO:0060206	estrous cycle phase	2	2	30.3027	0.00435389	0.0254865
GO:0060431	primary lung bud formation	2	2	30.3027	0.00435389	0.0254865
GO:0070256	negative regulation of mucus secretion	2	2	30.3027	0.00435389	0.0254865
GO:0070488	neutrophil aggregation	2	2	30.3027	0.00435389	0.0254865
GO:0071226	cellular response to molecule of fungal origin	2	2	30.3027	0.00435389	0.0254865
GO:0071727	cellular response to triacyl bacterial lipopeptide	2	2	30.3027	0.00435389	0.0254865
GO:0072012	glomerulus vasculature development	2	2	30.3027	0.00435389	0.0254865
GO:0090336	positive regulation of brown fat cell differentiation	2	2	30.3027	0.00435389	0.0254865
GO:1901299	negative regulation of hydrogen peroxide-mediated programmed cell death	2	2	30.3027	0.00435389	0.0254865
GO:1901857	positive regulation of cellular respiration	2	2	30.3027	0.00435389	0.0254865
GO:2000507	positive regulation of energy homeostasis	2	2	30.3027	0.00435389	0.0254865
GO:0002282	microglial cell activation involved in immune response	3	7	12.9869	0.00454639	0.025913
GO:0006002	fructose 6-phosphate metabolic process	3	7	12.9869	0.00454639	0.025913
GO:0007435	salivary gland morphogenesis	3	7	12.9869	0.00454639	0.025913
GO:0010886	positive regulation of cholesterol storage	3	7	12.9869	0.00454639	0.025913
GO:0015816	glycine transport	3	7	12.9869	0.00454639	0.025913
GO:0016572	histone phosphorylation	3	7	12.9869	0.00454639	0.025913
GO:0031622	positive regulation of fever generation	3	7	12.9869	0.00454639	0.025913
GO:0032962	positive regulation of inositol trisphosphate biosynthetic process	3	7	12.9869	0.00454639	0.025913
GO:0042428	serotonin metabolic process	3	7	12.9869	0.00454639	0.025913
GO:0044342	type B pancreatic cell proliferation	3	7	12.9869	0.00454639	0.025913
GO:0045577	regulation of B cell differentiation	3	7	12.9869	0.00454639	0.025913
GO:0045588	positive regulation of gamma-delta T cell differentiation	3	7	12.9869	0.00454639	0.025913
GO:0050665	hydrogen peroxide biosynthetic process	3	7	12.9869	0.00454639	0.025913
GO:0051602	response to electrical stimulus	3	7	12.9869	0.00454639	0.025913
GO:0060056	mammary gland involution	3	7	12.9869	0.00454639	0.025913
GO:0071223	cellular response to lipoteichoic acid	3	7	12.9869	0.00454639	0.025913
GO:2000114	regulation of establishment of cell polarity	3	7	12.9869	0.00454639	0.025913
GO:0090090	negative regulation of canonical Wnt receptor signaling pathway	9	79	3.45221	0.00470307	0.0267646
GO:0008016	regulation of heart contraction	5	25	6.06054	0.00476556	0.0270367
GO:0051258	protein polymerization	5	25	6.06054	0.00476556	0.0270367
GO:0009607	response to biotic stimulus	4	15	8.08072	0.00482091	0.0271832
GO:0031668	cellular response to extracellular stimulus	4	15	8.08072	0.00482091	0.0271832
GO:0050718	positive regulation of interleukin-1 beta secretion	4	15	8.08072	0.00482091	0.0271832
GO:0090023	positive regulation of neutrophil chemotaxis	4	15	8.08072	0.00482091	0.0271832
GO:0010923	negative regulation of phosphatase activity	7	50	4.24238	0.00486469	0.027263
GO:0043525	positive regulation of neuron apoptotic process	7	50	4.24238	0.00486469	0.027263
GO:0043588	skin development	7	50	4.24238	0.00486469	0.027263
GO:0090263	positive regulation of canonical Wnt receptor signaling pathway	7	50	4.24238	0.00486469	0.027263
GO:0043547	positive regulation of GTPase activity	6	37	4.91395	0.00495208	0.0277106
GO:0035914	skeletal muscle cell differentiation	7	51	4.1592	0.00547993	0.0306178
GO:0006457	protein folding	10	97	3.12399	0.00556843	0.0310651
GO:0007266	Rho protein signal transduction	6	38	4.78464	0.00571806	0.0318035
GO:0032729	positive regulation of interferon-gamma production	6	38	4.78464	0.00571806	0.0318035
GO:0031663	lipopolysaccharide-mediated signaling pathway	5	26	5.82744	0.00574108	0.0318353
GO:0071277	cellular response to calcium ion	5	26	5.82744	0.00574108	0.0318353
GO:0043010	camera-type eye development	8	66	3.67306	0.00582051	0.0322272
GO:0048704	embryonic skeletal system morphogenesis	7	52	4.07921	0.00615426	0.034024
GO:0031146	SCF-dependent proteasomal ubiquitin-dependent protein catabolic process	4	16	7.57568	0.00626066	0.0342522
GO:0032874	positive regulation of stress-activated MAPK cascade	4	16	7.57568	0.00626066	0.0342522
GO:0035329	hippo signaling cascade	4	16	7.57568	0.00626066	0.0342522
GO:0045582	positive regulation of T cell differentiation	4	16	7.57568	0.00626066	0.0342522
GO:0048747	muscle fiber development	4	16	7.57568	0.00626066	0.0342522
GO:0050870	positive regulation of T cell activation	4	16	7.57568	0.00626066	0.0342522
GO:0086091	regulation of heart rate by cardiac conduction	4	16	7.57568	0.00626066	0.0342522
GO:0030890	positive regulation of B cell proliferation	6	39	4.66196	0.00657106	0.0357909
GO:0045444	fat cell differentiation	6	39	4.66196	0.00657106	0.0357909
GO:0045732	positive regulation of protein catabolic process	6	39	4.66196	0.00657106	0.0357909
GO:0007040	lysosome organization	5	27	5.61161	0.006856	0.0367976
GO:0030168	platelet activation	5	27	5.61161	0.006856	0.0367976
GO:0030282	bone mineralization	5	27	5.61161	0.006856	0.0367976
GO:0045777	positive regulation of blood pressure	5	27	5.61161	0.006856	0.0367976
GO:0050796	regulation of insulin secretion	5	27	5.61161	0.006856	0.0367976
GO:0003007	heart morphogenesis	7	53	4.00225	0.00689145	0.0367976
GO:0001776	leukocyte homeostasis	3	8	11.3635	0.00709567	0.0367976
GO:0001798	positive regulation of type IIa hypersensitivity	3	8	11.3635	0.00709567	0.0367976
GO:0002262	myeloid cell homeostasis	3	8	11.3635	0.00709567	0.0367976
GO:0002931	response to ischemia	3	8	11.3635	0.00709567	0.0367976
GO:0006725	cellular aromatic compound metabolic process	3	8	11.3635	0.00709567	0.0367976
GO:0006835	dicarboxylic acid transport	3	8	11.3635	0.00709567	0.0367976
GO:0008354	germ cell migration	3	8	11.3635	0.00709567	0.0367976
GO:0012501	programmed cell death	3	8	11.3635	0.00709567	0.0367976
GO:0015833	peptide transport	3	8	11.3635	0.00709567	0.0367976
GO:0030431	sleep	3	8	11.3635	0.00709567	0.0367976
GO:0031340	positive regulation of vesicle fusion	3	8	11.3635	0.00709567	0.0367976
GO:0031659	positive regulation of cyclin-dependent protein serine/threonine kinase activity involved in G1/S transition of mitotic cell cycle	3	8	11.3635	0.00709567	0.0367976
GO:0032461	positive regulation of protein oligomerization	3	8	11.3635	0.00709567	0.0367976
GO:0033630	positive regulation of cell adhesion mediated by integrin	3	8	11.3635	0.00709567	0.0367976
GO:0045760	positive regulation of action potential	3	8	11.3635	0.00709567	0.0367976
GO:0045806	negative regulation of endocytosis	3	8	11.3635	0.00709567	0.0367976
GO:0045906	negative regulation of vasoconstriction	3	8	11.3635	0.00709567	0.0367976
GO:0048541	Peyer's patch development	3	8	11.3635	0.00709567	0.0367976
GO:0048729	tissue morphogenesis	3	8	11.3635	0.00709567	0.0367976
GO:0051001	negative regulation of nitric-oxide synthase activity	3	8	11.3635	0.00709567	0.0367976
GO:0060119	inner ear receptor cell development	3	8	11.3635	0.00709567	0.0367976
GO:0060259	regulation of feeding behavior	3	8	11.3635	0.00709567	0.0367976
GO:0060346	bone trabecula formation	3	8	11.3635	0.00709567	0.0367976
GO:0060997	dendritic spine morphogenesis	3	8	11.3635	0.00709567	0.0367976
GO:0070528	protein kinase C signaling cascade	3	8	11.3635	0.00709567	0.0367976
GO:0071514	genetic imprinting	3	8	11.3635	0.00709567	0.0367976
GO:0090314	positive regulation of protein targeting to membrane	3	8	11.3635	0.00709567	0.0367976
GO:2000649	regulation of sodium ion transmembrane transporter activity	3	8	11.3635	0.00709567	0.0367976
GO:0001569	patterning of blood vessels	6	40	4.54541	0.00751729	0.0389292
GO:0010468	regulation of gene expression	14	173	2.45224	0.00760315	0.0393185
GO:0000302	response to reactive oxygen species	4	17	7.13005	0.00797429	0.0407231
GO:0001975	response to amphetamine	4	17	7.13005	0.00797429	0.0407231
GO:0032314	regulation of Rac GTPase activity	4	17	7.13005	0.00797429	0.0407231
GO:0042346	positive regulation of NF-kappaB import into nucleus	4	17	7.13005	0.00797429	0.0407231
GO:0045671	negative regulation of osteoclast differentiation	4	17	7.13005	0.00797429	0.0407231
GO:0048745	smooth muscle tissue development	4	17	7.13005	0.00797429	0.0407231
GO:0050772	positive regulation of axonogenesis	4	17	7.13005	0.00797429	0.0407231
GO:0055117	regulation of cardiac muscle contraction	4	17	7.13005	0.00797429	0.0407231
GO:0071260	cellular response to mechanical stimulus	4	17	7.13005	0.00797429	0.0407231
GO:0006886	intracellular protein transport	14	174	2.43815	0.0080226	0.040913
GO:0001656	metanephros development	5	28	5.4112	0.00812171	0.0412471
GO:0007416	synapse assembly	5	28	5.4112	0.00812171	0.0412471
GO:0070373	negative regulation of ERK1 and ERK2 cascade	5	28	5.4112	0.00812171	0.0412471
GO:0030183	B cell differentiation	6	41	4.43454	0.0085631	0.0434288
GO:0007186	G-protein coupled receptor signaling pathway	85	1850	1.39229	0.00924148	0.0468049
GO:0010595	positive regulation of endothelial cell migration	5	29	5.22461	0.00954976	0.0480358
GO:0042542	response to hydrogen peroxide	5	29	5.22461	0.00954976	0.0480358
GO:0046676	negative regulation of insulin secretion	5	29	5.22461	0.00954976	0.0480358
GO:0048514	blood vessel morphogenesis	5	29	5.22461	0.00954976	0.0480358
GO:0050873	brown fat cell differentiation	5	29	5.22461	0.00954976	0.0480358
GO:0019915	lipid storage	4	18	6.73394	0.00998659	0.04969
GO:0031290	retinal ganglion cell axon guidance	4	18	6.73394	0.00998659	0.04969
GO:0034394	protein localization to cell surface	4	18	6.73394	0.00998659	0.04969
GO:0042157	lipoprotein metabolic process	4	18	6.73394	0.00998659	0.04969
GO:0042310	vasoconstriction	4	18	6.73394	0.00998659	0.04969
GO:0046847	filopodium assembly	4	18	6.73394	0.00998659	0.04969
GO:0055074	calcium ion homeostasis	4	18	6.73394	0.00998659	0.04969
GO:0072661	protein targeting to plasma membrane	4	18	6.73394	0.00998659	0.04969
GO:0002218	activation of innate immune response	3	9	10.1009	0.0103827	0.0502354
GO:0007009	plasma membrane organization	3	9	10.1009	0.0103827	0.0502354
GO:0010744	positive regulation of macrophage derived foam cell differentiation	3	9	10.1009	0.0103827	0.0502354
GO:0014049	positive regulation of glutamate secretion	3	9	10.1009	0.0103827	0.0502354
GO:0015804	neutral amino acid transport	3	9	10.1009	0.0103827	0.0502354
GO:0031529	ruffle organization	3	9	10.1009	0.0103827	0.0502354
GO:0032727	positive regulation of interferon-alpha production	3	9	10.1009	0.0103827	0.0502354
GO:0032930	positive regulation of superoxide anion generation	3	9	10.1009	0.0103827	0.0502354
GO:0034122	negative regulation of toll-like receptor signaling pathway	3	9	10.1009	0.0103827	0.0502354
GO:0035234	germ cell programmed cell death	3	9	10.1009	0.0103827	0.0502354
GO:0035414	negative regulation of catenin import into nucleus	3	9	10.1009	0.0103827	0.0502354
GO:0042993	positive regulation of transcription factor import into nucleus	3	9	10.1009	0.0103827	0.0502354
GO:0043206	extracellular fibril organization	3	9	10.1009	0.0103827	0.0502354
GO:0045995	regulation of embryonic development	3	9	10.1009	0.0103827	0.0502354
GO:0046426	negative regulation of JAK-STAT cascade	3	9	10.1009	0.0103827	0.0502354
GO:0048149	behavioral response to ethanol	3	9	10.1009	0.0103827	0.0502354
GO:0050765	negative regulation of phagocytosis	3	9	10.1009	0.0103827	0.0502354
GO:0060252	positive regulation of glial cell proliferation	3	9	10.1009	0.0103827	0.0502354
GO:0060586	multicellular organismal iron ion homeostasis	3	9	10.1009	0.0103827	0.0502354
GO:0060736	prostate gland growth	3	9	10.1009	0.0103827	0.0502354
GO:2001235	positive regulation of apoptotic signaling pathway	3	9	10.1009	0.0103827	0.0502354
GO:0007599	hemostasis	6	43	4.22829	0.0109794	0.0530527
GO:0032355	response to estradiol stimulus	5	30	5.05045	0.0111517	0.0536741
GO:0043491	protein kinase B signaling cascade	5	30	5.05045	0.0111517	0.0536741
GO:0071407	cellular response to organic cyclic compound	5	30	5.05045	0.0111517	0.0536741
GO:0030900	forebrain development	8	74	3.27597	0.0121236	0.0570827
GO:0001659	temperature homeostasis	4	19	6.37952	0.0123218	0.0570827
GO:0007610	behavior	4	19	6.37952	0.0123218	0.0570827
GO:0015914	phospholipid transport	4	19	6.37952	0.0123218	0.0570827
GO:0021772	olfactory bulb development	4	19	6.37952	0.0123218	0.0570827
GO:0030818	negative regulation of cAMP biosynthetic process	4	19	6.37952	0.0123218	0.0570827
GO:0042104	positive regulation of activated T cell proliferation	4	19	6.37952	0.0123218	0.0570827
GO:0043113	receptor clustering	4	19	6.37952	0.0123218	0.0570827
GO:0045880	positive regulation of smoothened signaling pathway	4	19	6.37952	0.0123218	0.0570827
GO:0070555	response to interleukin-1	4	19	6.37952	0.0123218	0.0570827
GO:0001915	negative regulation of T cell mediated cytotoxicity	2	3	20.2018	0.0127746	0.0570827
GO:0002315	marginal zone B cell differentiation	2	3	20.2018	0.0127746	0.0570827
GO:0002366	leukocyte activation involved in immune response	2	3	20.2018	0.0127746	0.0570827
GO:0002513	tolerance induction to self antigen	2	3	20.2018	0.0127746	0.0570827
GO:0002554	serotonin secretion by platelet	2	3	20.2018	0.0127746	0.0570827
GO:0002924	negative regulation of humoral immune response mediated by circulating immunoglobulin	2	3	20.2018	0.0127746	0.0570827
GO:0002934	desmosome organization	2	3	20.2018	0.0127746	0.0570827
GO:0006689	ganglioside catabolic process	2	3	20.2018	0.0127746	0.0570827
GO:0006926	virus-infected cell apoptotic process	2	3	20.2018	0.0127746	0.0570827
GO:0007161	calcium-independent cell-matrix adhesion	2	3	20.2018	0.0127746	0.0570827
GO:0007529	establishment of synaptic specificity at neuromuscular junction	2	3	20.2018	0.0127746	0.0570827
GO:0009247	glycolipid biosynthetic process	2	3	20.2018	0.0127746	0.0570827
GO:0009448	gamma-aminobutyric acid metabolic process	2	3	20.2018	0.0127746	0.0570827
GO:0010032	meiotic chromosome condensation	2	3	20.2018	0.0127746	0.0570827
GO:0014829	vascular smooth muscle contraction	2	3	20.2018	0.0127746	0.0570827
GO:0015732	prostaglandin transport	2	3	20.2018	0.0127746	0.0570827
GO:0016139	glycoside catabolic process	2	3	20.2018	0.0127746	0.0570827
GO:0019884	antigen processing and presentation of exogenous antigen	2	3	20.2018	0.0127746	0.0570827
GO:0019885	antigen processing and presentation of endogenous peptide antigen via MHC class I	2	3	20.2018	0.0127746	0.0570827
GO:0021885	forebrain cell migration	2	3	20.2018	0.0127746	0.0570827
GO:0023021	termination of signal transduction	2	3	20.2018	0.0127746	0.0570827
GO:0030497	fatty acid elongation	2	3	20.2018	0.0127746	0.0570827
GO:0033031	positive regulation of neutrophil apoptotic process	2	3	20.2018	0.0127746	0.0570827
GO:0034113	heterotypic cell-cell adhesion	2	3	20.2018	0.0127746	0.0570827
GO:0034447	very-low-density lipoprotein particle clearance	2	3	20.2018	0.0127746	0.0570827
GO:0035284	brain segmentation	2	3	20.2018	0.0127746	0.0570827
GO:0035589	G-protein coupled purinergic nucleotide receptor signaling pathway	2	3	20.2018	0.0127746	0.0570827
GO:0035989	tendon development	2	3	20.2018	0.0127746	0.0570827
GO:0038091	positive regulation of cell proliferation by VEGF-activated platelet derived growth factor receptor signaling pathway	2	3	20.2018	0.0127746	0.0570827
GO:0042063	gliogenesis	2	3	20.2018	0.0127746	0.0570827
GO:0042321	negative regulation of circadian sleep/wake cycle, sleep	2	3	20.2018	0.0127746	0.0570827
GO:0042531	positive regulation of tyrosine phosphorylation of STAT protein	2	3	20.2018	0.0127746	0.0570827
GO:0045163	clustering of voltage-gated potassium channels	2	3	20.2018	0.0127746	0.0570827
GO:0045759	negative regulation of action potential	2	3	20.2018	0.0127746	0.0570827
GO:0045963	negative regulation of dopamine metabolic process	2	3	20.2018	0.0127746	0.0570827
GO:0048841	regulation of axon extension involved in axon guidance	2	3	20.2018	0.0127746	0.0570827
GO:0051383	kinetochore organization	2	3	20.2018	0.0127746	0.0570827
GO:0055099	response to high density lipoprotein particle stimulus	2	3	20.2018	0.0127746	0.0570827
GO:0060316	positive regulation of ryanodine-sensitive calcium-release channel activity	2	3	20.2018	0.0127746	0.0570827
GO:0060443	mammary gland morphogenesis	2	3	20.2018	0.0127746	0.0570827
GO:0060685	regulation of prostatic bud formation	2	3	20.2018	0.0127746	0.0570827
GO:0060748	tertiary branching involved in mammary gland duct morphogenesis	2	3	20.2018	0.0127746	0.0570827
GO:0070487	monocyte aggregation	2	3	20.2018	0.0127746	0.0570827
GO:0070649	formin-nucleated actin cable assembly	2	3	20.2018	0.0127746	0.0570827
GO:0072277	metanephric glomerular capillary formation	2	3	20.2018	0.0127746	0.0570827
GO:2000121	regulation of removal of superoxide radicals	2	3	20.2018	0.0127746	0.0570827
GO:2000304	positive regulation of ceramide biosynthetic process	2	3	20.2018	0.0127746	0.0570827
GO:2001171	positive regulation of ATP biosynthetic process	2	3	20.2018	0.0127746	0.0570827
GO:2001181	positive regulation of interleukin-10 secretion	2	3	20.2018	0.0127746	0.0570827
GO:0006006	glucose metabolic process	7	59	3.59524	0.0128585	0.057388
GO:0006958	complement activation, classical pathway	5	31	4.88753	0.0129393	0.0574006
GO:0042755	eating behavior	5	31	4.88753	0.0129393	0.0574006
GO:0045776	negative regulation of blood pressure	5	31	4.88753	0.0129393	0.0574006
GO:0048589	developmental growth	5	31	4.88753	0.0129393	0.0574006
GO:0051262	protein tetramerization	5	31	4.88753	0.0129393	0.0574006
GO:0009952	anterior/posterior pattern specification	10	109	2.78007	0.0132574	0.0587409
GO:0006470	protein dephosphorylation	11	127	2.62464	0.0132953	0.0588379
GO:0060548	negative regulation of cell death	6	45	4.04036	0.0138729	0.0613204
GO:0006486	protein glycosylation	7	60	3.53532	0.0141494	0.062444
GO:0007601	visual perception	10	110	2.75479	0.014161	0.062444
GO:0006914	autophagy	8	76	3.18976	0.014319	0.0625319
GO:0007191	adenylate cyclase-activating dopamine receptor signaling pathway	3	10	9.09081	0.0144696	0.0625319
GO:0015893	drug transport	3	10	9.09081	0.0144696	0.0625319
GO:0016540	protein autoprocessing	3	10	9.09081	0.0144696	0.0625319
GO:0019752	carboxylic acid metabolic process	3	10	9.09081	0.0144696	0.0625319
GO:0021680	cerebellar Purkinje cell layer development	3	10	9.09081	0.0144696	0.0625319
GO:0030194	positive regulation of blood coagulation	3	10	9.09081	0.0144696	0.0625319
GO:0031000	response to caffeine	3	10	9.09081	0.0144696	0.0625319
GO:0031076	embryonic camera-type eye development	3	10	9.09081	0.0144696	0.0625319
GO:0031110	regulation of microtubule polymerization or depolymerization	3	10	9.09081	0.0144696	0.0625319
GO:0042135	neurotransmitter catabolic process	3	10	9.09081	0.0144696	0.0625319
GO:0043149	stress fiber assembly	3	10	9.09081	0.0144696	0.0625319
GO:0045088	regulation of innate immune response	3	10	9.09081	0.0144696	0.0625319
GO:0045821	positive regulation of glycolysis	3	10	9.09081	0.0144696	0.0625319
GO:0046620	regulation of organ growth	3	10	9.09081	0.0144696	0.0625319
GO:0070997	neuron death	3	10	9.09081	0.0144696	0.0625319
GO:2000573	positive regulation of DNA biosynthetic process	3	10	9.09081	0.0144696	0.0625319
GO:0000086	G2/M transition of mitotic cell cycle	5	32	4.7348	0.0149241	0.0639385
GO:0035115	embryonic forelimb morphogenesis	5	32	4.7348	0.0149241	0.0639385
GO:0048536	spleen development	5	32	4.7348	0.0149241	0.0639385
GO:0051924	regulation of calcium ion transport	5	32	4.7348	0.0149241	0.0639385
GO:0072659	protein localization to plasma membrane	5	32	4.7348	0.0149241	0.0639385
GO:0001782	B cell homeostasis	4	20	6.06054	0.0150035	0.0639385
GO:0002052	positive regulation of neuroblast proliferation	4	20	6.06054	0.0150035	0.0639385
GO:0010765	positive regulation of sodium ion transport	4	20	6.06054	0.0150035	0.0639385
GO:0045638	negative regulation of myeloid cell differentiation	4	20	6.06054	0.0150035	0.0639385
GO:0045672	positive regulation of osteoclast differentiation	4	20	6.06054	0.0150035	0.0639385
GO:0048593	camera-type eye morphogenesis	4	20	6.06054	0.0150035	0.0639385
GO:0050770	regulation of axonogenesis	4	20	6.06054	0.0150035	0.0639385
GO:0042787	protein ubiquitination involved in ubiquitin-dependent protein catabolic process	6	46	3.95253	0.0155154	0.0660436
GO:0006641	triglyceride metabolic process	5	33	4.59132	0.0171178	0.0726124
GO:0030073	insulin secretion	5	33	4.59132	0.0171178	0.0726124
GO:0050852	T cell receptor signaling pathway	5	33	4.59132	0.0171178	0.0726124
GO:0000060	protein import into nucleus, translocation	4	21	5.77195	0.0180545	0.0761474
GO:0019216	regulation of lipid metabolic process	4	21	5.77195	0.0180545	0.0761474
GO:0034605	cellular response to heat	4	21	5.77195	0.0180545	0.0761474
GO:0070207	protein homotrimerization	4	21	5.77195	0.0180545	0.0761474
GO:0070301	cellular response to hydrogen peroxide	4	21	5.77195	0.0180545	0.0761474
GO:0045666	positive regulation of neuron differentiation	8	79	3.06863	0.0181741	0.0765642
GO:0001783	B cell apoptotic process	3	11	8.26438	0.0194099	0.0799411
GO:0002031	G-protein coupled receptor internalization	3	11	8.26438	0.0194099	0.0799411
GO:0007062	sister chromatid cohesion	3	11	8.26438	0.0194099	0.0799411
GO:0007076	mitotic chromosome condensation	3	11	8.26438	0.0194099	0.0799411
GO:0008610	lipid biosynthetic process	3	11	8.26438	0.0194099	0.0799411
GO:0021795	cerebral cortex cell migration	3	11	8.26438	0.0194099	0.0799411
GO:0030225	macrophage differentiation	3	11	8.26438	0.0194099	0.0799411
GO:0031396	regulation of protein ubiquitination	3	11	8.26438	0.0194099	0.0799411
GO:0031589	cell-substrate adhesion	3	11	8.26438	0.0194099	0.0799411
GO:0033700	phospholipid efflux	3	11	8.26438	0.0194099	0.0799411
GO:0046641	positive regulation of alpha-beta T cell proliferation	3	11	8.26438	0.0194099	0.0799411
GO:0046688	response to copper ion	3	11	8.26438	0.0194099	0.0799411
GO:0046697	decidualization	3	11	8.26438	0.0194099	0.0799411
GO:0047496	vesicle transport along microtubule	3	11	8.26438	0.0194099	0.0799411
GO:0048148	behavioral response to cocaine	3	11	8.26438	0.0194099	0.0799411
GO:0048771	tissue remodeling	3	11	8.26438	0.0194099	0.0799411
GO:0050795	regulation of behavior	3	11	8.26438	0.0194099	0.0799411
GO:0051481	reduction of cytosolic calcium ion concentration	3	11	8.26438	0.0194099	0.0799411
GO:0060391	positive regulation of SMAD protein import into nucleus	3	11	8.26438	0.0194099	0.0799411
GO:0071360	cellular response to exogenous dsRNA	3	11	8.26438	0.0194099	0.0799411
GO:0048511	rhythmic process	5	34	4.45628	0.0195318	0.080353
GO:0071222	cellular response to lipopolysaccharide	9	98	2.7829	0.0206654	0.0849217
GO:0001938	positive regulation of endothelial cell proliferation	6	49	3.71054	0.0213083	0.0872669
GO:0042632	cholesterol homeostasis	6	49	3.71054	0.0213083	0.0872669
GO:0050680	negative regulation of epithelial cell proliferation	6	49	3.71054	0.0213083	0.0872669
GO:0006820	anion transport	4	22	5.50958	0.0214968	0.0872669
GO:0007193	adenylate cyclase-inhibiting G-protein coupled receptor signaling pathway	4	22	5.50958	0.0214968	0.0872669
GO:0045739	positive regulation of DNA repair	4	22	5.50958	0.0214968	0.0872669
GO:0048535	lymph node development	4	22	5.50958	0.0214968	0.0872669
GO:0050714	positive regulation of protein secretion	4	22	5.50958	0.0214968	0.0872669
GO:0060173	limb development	4	22	5.50958	0.0214968	0.0872669
GO:0060291	long-term synaptic potentiation	4	22	5.50958	0.0214968	0.0872669
GO:0070509	calcium ion import	4	22	5.50958	0.0214968	0.0872669
GO:0030308	negative regulation of cell growth	10	117	2.58998	0.0219348	0.088947
GO:0030522	intracellular receptor signaling pathway	5	35	4.32896	0.0221775	0.0897337
GO:0045597	positive regulation of cell differentiation	5	35	4.32896	0.0221775	0.0897337
GO:0030182	neuron differentiation	9	100	2.72724	0.0235717	0.0933432
GO:0030162	regulation of proteolysis	7	66	3.21392	0.0240724	0.0933432
GO:0030036	actin cytoskeleton organization	10	119	2.54645	0.0246767	0.0933432
GO:0001661	conditioned taste aversion	2	4	15.1514	0.0249893	0.0933432
GO:0001788	antibody-dependent cellular cytotoxicity	2	4	15.1514	0.0249893	0.0933432
GO:0001820	serotonin secretion	2	4	15.1514	0.0249893	0.0933432
GO:0001845	phagolysosome assembly	2	4	15.1514	0.0249893	0.0933432
GO:0002138	retinoic acid biosynthetic process	2	4	15.1514	0.0249893	0.0933432
GO:0006085	acetyl-CoA biosynthetic process	2	4	15.1514	0.0249893	0.0933432
GO:0006933	negative regulation of cell adhesion involved in substrate-bound cell migration	2	4	15.1514	0.0249893	0.0933432
GO:0007412	axon target recognition	2	4	15.1514	0.0249893	0.0933432
GO:0007567	parturition	2	4	15.1514	0.0249893	0.0933432
GO:0008054	cyclin catabolic process	2	4	15.1514	0.0249893	0.0933432
GO:0009166	nucleotide catabolic process	2	4	15.1514	0.0249893	0.0933432
GO:0010936	negative regulation of macrophage cytokine production	2	4	15.1514	0.0249893	0.0933432
GO:0014051	gamma-aminobutyric acid secretion	2	4	15.1514	0.0249893	0.0933432
GO:0015810	aspartate transport	2	4	15.1514	0.0249893	0.0933432
GO:0019262	N-acetylneuraminate catabolic process	2	4	15.1514	0.0249893	0.0933432
GO:0019896	axon transport of mitochondrion	2	4	15.1514	0.0249893	0.0933432
GO:0031346	positive regulation of cell projection organization	2	4	15.1514	0.0249893	0.0933432
GO:0032233	positive regulation of actin filament bundle assembly	2	4	15.1514	0.0249893	0.0933432
GO:0032507	maintenance of protein location in cell	2	4	15.1514	0.0249893	0.0933432
GO:0032970	regulation of actin filament-based process	2	4	15.1514	0.0249893	0.0933432
GO:0033563	dorsal/ventral axon guidance	2	4	15.1514	0.0249893	0.0933432
GO:0033574	response to testosterone stimulus	2	4	15.1514	0.0249893	0.0933432
GO:0034144	negative regulation of toll-like receptor 4 signaling pathway	2	4	15.1514	0.0249893	0.0933432
GO:0034162	toll-like receptor 9 signaling pathway	2	4	15.1514	0.0249893	0.0933432
GO:0034405	response to fluid shear stress	2	4	15.1514	0.0249893	0.0933432
GO:0034435	cholesterol esterification	2	4	15.1514	0.0249893	0.0933432
GO:0034626	fatty acid elongation, polyunsaturated fatty acid	2	4	15.1514	0.0249893	0.0933432
GO:0035590	purinergic nucleotide receptor signaling pathway	2	4	15.1514	0.0249893	0.0933432
GO:0035630	bone mineralization involved in bone maturation	2	4	15.1514	0.0249893	0.0933432
GO:0038003	opioid receptor signaling pathway	2	4	15.1514	0.0249893	0.0933432
GO:0038007	netrin-activated signaling pathway	2	4	15.1514	0.0249893	0.0933432
GO:0040023	establishment of nucleus localization	2	4	15.1514	0.0249893	0.0933432
GO:0042270	protection from natural killer cell mediated cytotoxicity	2	4	15.1514	0.0249893	0.0933432
GO:0043043	peptide biosynthetic process	2	4	15.1514	0.0249893	0.0933432
GO:0043312	neutrophil degranulation	2	4	15.1514	0.0249893	0.0933432
GO:0043372	positive regulation of CD4-positive, alpha-beta T cell differentiation	2	4	15.1514	0.0249893	0.0933432
GO:0043374	CD8-positive, alpha-beta T cell differentiation	2	4	15.1514	0.0249893	0.0933432
GO:0043648	dicarboxylic acid metabolic process	2	4	15.1514	0.0249893	0.0933432
GO:0044319	wound healing, spreading of cells	2	4	15.1514	0.0249893	0.0933432
GO:0045123	cellular extravasation	2	4	15.1514	0.0249893	0.0933432
GO:0045132	meiotic chromosome segregation	2	4	15.1514	0.0249893	0.0933432
GO:0045332	phospholipid translocation	2	4	15.1514	0.0249893	0.0933432
GO:0045356	positive regulation of interferon-alpha biosynthetic process	2	4	15.1514	0.0249893	0.0933432
GO:0045602	negative regulation of endothelial cell differentiation	2	4	15.1514	0.0249893	0.0933432
GO:0045621	positive regulation of lymphocyte differentiation	2	4	15.1514	0.0249893	0.0933432
GO:0045656	negative regulation of monocyte differentiation	2	4	15.1514	0.0249893	0.0933432
GO:0045833	negative regulation of lipid metabolic process	2	4	15.1514	0.0249893	0.0933432
GO:0046541	saliva secretion	2	4	15.1514	0.0249893	0.0933432
GO:0048014	Tie signaling pathway	2	4	15.1514	0.0249893	0.0933432
GO:0050702	interleukin-1 beta secretion	2	4	15.1514	0.0249893	0.0933432
GO:0051612	negative regulation of serotonin uptake	2	4	15.1514	0.0249893	0.0933432
GO:0051668	localization within membrane	2	4	15.1514	0.0249893	0.0933432
GO:0051782	negative regulation of cell division	2	4	15.1514	0.0249893	0.0933432
GO:0060024	rhythmic synaptic transmission	2	4	15.1514	0.0249893	0.0933432
GO:0060054	positive regulation of epithelial cell proliferation involved in wound healing	2	4	15.1514	0.0249893	0.0933432
GO:0060073	micturition	2	4	15.1514	0.0249893	0.0933432
GO:0060078	regulation of postsynaptic membrane potential	2	4	15.1514	0.0249893	0.0933432
GO:0060571	morphogenesis of an epithelial fold	2	4	15.1514	0.0249893	0.0933432
GO:0071205	protein localization to juxtaparanode region of axon	2	4	15.1514	0.0249893	0.0933432
GO:0072498	embryonic skeletal joint development	2	4	15.1514	0.0249893	0.0933432
GO:0086012	membrane depolarization involved in regulation of cardiac muscle cell action potential	2	4	15.1514	0.0249893	0.0933432
GO:0090330	regulation of platelet aggregation	2	4	15.1514	0.0249893	0.0933432
GO:1901660	calcium ion export	2	4	15.1514	0.0249893	0.0933432
GO:2000249	regulation of actin cytoskeleton reorganization	2	4	15.1514	0.0249893	0.0933432
GO:2001046	positive regulation of integrin-mediated signaling pathway	2	4	15.1514	0.0249893	0.0933432
GO:2001056	positive regulation of cysteine-type endopeptidase activity	2	4	15.1514	0.0249893	0.0933432
GO:2001199	negative regulation of dendritic cell differentiation	2	4	15.1514	0.0249893	0.0933432
GO:0060048	cardiac muscle contraction	5	36	4.20871	0.0250663	0.0933432
GO:0001946	lymphangiogenesis	3	12	7.57568	0.0252491	0.0933432
GO:0007252	I-kappaB phosphorylation	3	12	7.57568	0.0252491	0.0933432
GO:0016998	cell wall macromolecule catabolic process	3	12	7.57568	0.0252491	0.0933432
GO:0035066	positive regulation of histone acetylation	3	12	7.57568	0.0252491	0.0933432
GO:0042730	fibrinolysis	3	12	7.57568	0.0252491	0.0933432
GO:0043583	ear development	3	12	7.57568	0.0252491	0.0933432
GO:0045078	positive regulation of interferon-gamma biosynthetic process	3	12	7.57568	0.0252491	0.0933432
GO:0046907	intracellular transport	3	12	7.57568	0.0252491	0.0933432
GO:0050678	regulation of epithelial cell proliferation	3	12	7.57568	0.0252491	0.0933432
GO:0051044	positive regulation of membrane protein ectodomain proteolysis	3	12	7.57568	0.0252491	0.0933432
GO:0051272	positive regulation of cellular component movement	3	12	7.57568	0.0252491	0.0933432
GO:0060732	positive regulation of inositol phosphate biosynthetic process	3	12	7.57568	0.0252491	0.0933432
GO:0090102	cochlea development	3	12	7.57568	0.0252491	0.0933432
GO:0002027	regulation of heart rate	4	23	5.27004	0.0253512	0.0933432
GO:0007173	epidermal growth factor receptor signaling pathway	4	23	5.27004	0.0253512	0.0933432
GO:0019835	cytolysis	4	23	5.27004	0.0253512	0.0933432
GO:0042177	negative regulation of protein catabolic process	4	23	5.27004	0.0253512	0.0933432
GO:0048568	embryonic organ development	4	23	5.27004	0.0253512	0.0933432
GO:0071356	cellular response to tumor necrosis factor	4	23	5.27004	0.0253512	0.0933432
GO:0007566	embryo implantation	5	37	4.09496	0.0282092	0.103659
GO:0021766	hippocampus development	5	37	4.09496	0.0282092	0.103659
GO:0032147	activation of protein kinase activity	4	24	5.05045	0.0296378	0.1088
GO:0009790	embryo development	9	104	2.62235	0.0303198	0.111193
GO:0000070	mitotic sister chromatid segregation	3	13	6.99293	0.0320251	0.114705
GO:0002087	regulation of respiratory gaseous exchange by neurological system process	3	13	6.99293	0.0320251	0.114705
GO:0006270	DNA replication initiation	3	13	6.99293	0.0320251	0.114705
GO:0006662	glycerol ether metabolic process	3	13	6.99293	0.0320251	0.114705
GO:0006790	sulfur compound metabolic process	3	13	6.99293	0.0320251	0.114705
GO:0006940	regulation of smooth muscle contraction	3	13	6.99293	0.0320251	0.114705
GO:0006956	complement activation	3	13	6.99293	0.0320251	0.114705
GO:0007588	excretion	3	13	6.99293	0.0320251	0.114705
GO:0010906	regulation of glucose metabolic process	3	13	6.99293	0.0320251	0.114705
GO:0030517	negative regulation of axon extension	3	13	6.99293	0.0320251	0.114705
GO:0032331	negative regulation of chondrocyte differentiation	3	13	6.99293	0.0320251	0.114705
GO:0032753	positive regulation of interleukin-4 production	3	13	6.99293	0.0320251	0.114705
GO:0033137	negative regulation of peptidyl-serine phosphorylation	3	13	6.99293	0.0320251	0.114705
GO:0042100	B cell proliferation	3	13	6.99293	0.0320251	0.114705
GO:0042573	retinoic acid metabolic process	3	13	6.99293	0.0320251	0.114705
GO:0042953	lipoprotein transport	3	13	6.99293	0.0320251	0.114705
GO:0043268	positive regulation of potassium ion transport	3	13	6.99293	0.0320251	0.114705
GO:0043537	negative regulation of blood vessel endothelial cell migration	3	13	6.99293	0.0320251	0.114705
GO:0046835	carbohydrate phosphorylation	3	13	6.99293	0.0320251	0.114705
GO:0050673	epithelial cell proliferation	3	13	6.99293	0.0320251	0.114705
GO:0050995	negative regulation of lipid catabolic process	3	13	6.99293	0.0320251	0.114705
GO:0051146	striated muscle cell differentiation	3	13	6.99293	0.0320251	0.114705
GO:0060389	pathway-restricted SMAD protein phosphorylation	3	13	6.99293	0.0320251	0.114705
GO:0060766	negative regulation of androgen receptor signaling pathway	3	13	6.99293	0.0320251	0.114705
GO:0006469	negative regulation of protein kinase activity	6	54	3.36697	0.034259	0.122587
GO:0046627	negative regulation of insulin receptor signaling pathway	4	25	4.84843	0.0343754	0.122765
GO:0048813	dendrite morphogenesis	4	25	4.84843	0.0343754	0.122765
GO:0045727	positive regulation of translation	5	39	3.88496	0.0353001	0.125945
GO:0007417	central nervous system development	6	55	3.30575	0.0374046	0.133324
GO:0009749	response to glucose stimulus	5	40	3.78784	0.0392691	0.133689
GO:0001837	epithelial to mesenchymal transition	4	26	4.66196	0.0395816	0.133689
GO:0001892	embryonic placenta development	4	26	4.66196	0.0395816	0.133689
GO:0007631	feeding behavior	4	26	4.66196	0.0395816	0.133689
GO:0010862	positive regulation of pathway-restricted SMAD protein phosphorylation	4	26	4.66196	0.0395816	0.133689
GO:0034599	cellular response to oxidative stress	4	26	4.66196	0.0395816	0.133689
GO:0035108	limb morphogenesis	4	26	4.66196	0.0395816	0.133689
GO:0045931	positive regulation of mitotic cell cycle	4	26	4.66196	0.0395816	0.133689
GO:0006541	glutamine metabolic process	3	14	6.49344	0.0397693	0.133689
GO:0007210	serotonin receptor signaling pathway	3	14	6.49344	0.0397693	0.133689
GO:0009268	response to pH	3	14	6.49344	0.0397693	0.133689
GO:0010800	positive regulation of peptidyl-threonine phosphorylation	3	14	6.49344	0.0397693	0.133689
GO:0030048	actin filament-based movement	3	14	6.49344	0.0397693	0.133689
GO:0030889	negative regulation of B cell proliferation	3	14	6.49344	0.0397693	0.133689
GO:0030949	positive regulation of vascular endothelial growth factor receptor signaling pathway	3	14	6.49344	0.0397693	0.133689
GO:0031295	T cell costimulation	3	14	6.49344	0.0397693	0.133689
GO:0032781	positive regulation of ATPase activity	3	14	6.49344	0.0397693	0.133689
GO:0040015	negative regulation of multicellular organism growth	3	14	6.49344	0.0397693	0.133689
GO:0042554	superoxide anion generation	3	14	6.49344	0.0397693	0.133689
GO:0046579	positive regulation of Ras protein signal transduction	3	14	6.49344	0.0397693	0.133689
GO:0048675	axon extension	3	14	6.49344	0.0397693	0.133689
GO:0051482	elevation of cytosolic calcium ion concentration involved in phospholipase C-activating G-protein coupled signaling pathway	3	14	6.49344	0.0397693	0.133689
GO:0060979	vasculogenesis involved in coronary vascular morphogenesis	3	14	6.49344	0.0397693	0.133689
GO:0061178	regulation of insulin secretion involved in cellular response to glucose stimulus	3	14	6.49344	0.0397693	0.133689
GO:0071320	cellular response to cAMP	3	14	6.49344	0.0397693	0.133689
GO:0071345	cellular response to cytokine stimulus	3	14	6.49344	0.0397693	0.133689
GO:0001660	fever generation	2	5	12.1211	0.0407385	0.133689
GO:0001774	microglial cell activation	2	5	12.1211	0.0407385	0.133689
GO:0001878	response to yeast	2	5	12.1211	0.0407385	0.133689
GO:0001957	intramembranous ossification	2	5	12.1211	0.0407385	0.133689
GO:0002553	histamine secretion by mast cell	2	5	12.1211	0.0407385	0.133689
GO:0002573	myeloid leukocyte differentiation	2	5	12.1211	0.0407385	0.133689
GO:0002636	positive regulation of germinal center formation	2	5	12.1211	0.0407385	0.133689
GO:0002906	negative regulation of mature B cell apoptotic process	2	5	12.1211	0.0407385	0.133689
GO:0003085	negative regulation of systemic arterial blood pressure	2	5	12.1211	0.0407385	0.133689
GO:0006308	DNA catabolic process	2	5	12.1211	0.0407385	0.133689
GO:0007044	cell-substrate junction assembly	2	5	12.1211	0.0407385	0.133689
GO:0007171	activation of transmembrane receptor protein tyrosine kinase activity	2	5	12.1211	0.0407385	0.133689
GO:0007195	adenylate cyclase-inhibiting dopamine receptor signaling pathway	2	5	12.1211	0.0407385	0.133689
GO:0009062	fatty acid catabolic process	2	5	12.1211	0.0407385	0.133689
GO:0010039	response to iron ion	2	5	12.1211	0.0407385	0.133689
GO:0010572	positive regulation of platelet activation	2	5	12.1211	0.0407385	0.133689
GO:0010940	positive regulation of necrotic cell death	2	5	12.1211	0.0407385	0.133689
GO:0014037	Schwann cell differentiation	2	5	12.1211	0.0407385	0.133689
GO:0014850	response to muscle activity	2	5	12.1211	0.0407385	0.133689
GO:0016082	synaptic vesicle priming	2	5	12.1211	0.0407385	0.133689
GO:0021631	optic nerve morphogenesis	2	5	12.1211	0.0407385	0.133689
GO:0022617	extracellular matrix disassembly	2	5	12.1211	0.0407385	0.133689
GO:0030213	hyaluronan biosynthetic process	2	5	12.1211	0.0407385	0.133689
GO:0031394	positive regulation of prostaglandin biosynthetic process	2	5	12.1211	0.0407385	0.133689
GO:0033564	anterior/posterior axon guidance	2	5	12.1211	0.0407385	0.133689
GO:0033625	positive regulation of integrin activation	2	5	12.1211	0.0407385	0.133689
GO:0034116	positive regulation of heterotypic cell-cell adhesion	2	5	12.1211	0.0407385	0.133689
GO:0034134	toll-like receptor 2 signaling pathway	2	5	12.1211	0.0407385	0.133689
GO:0035356	cellular triglyceride homeostasis	2	5	12.1211	0.0407385	0.133689
GO:0035456	response to interferon-beta	2	5	12.1211	0.0407385	0.133689
GO:0035814	negative regulation of renal sodium excretion	2	5	12.1211	0.0407385	0.133689
GO:0035988	chondrocyte proliferation	2	5	12.1211	0.0407385	0.133689
GO:0038084	vascular endothelial growth factor signaling pathway	2	5	12.1211	0.0407385	0.133689
GO:0042482	positive regulation of odontogenesis	2	5	12.1211	0.0407385	0.133689
GO:0043304	regulation of mast cell degranulation	2	5	12.1211	0.0407385	0.133689
GO:0043615	astrocyte cell migration	2	5	12.1211	0.0407385	0.133689
GO:0044539	long-chain fatty acid import	2	5	12.1211	0.0407385	0.133689
GO:0045351	type I interferon biosynthetic process	2	5	12.1211	0.0407385	0.133689
GO:0045475	locomotor rhythm	2	5	12.1211	0.0407385	0.133689
GO:0045630	positive regulation of T-helper 2 cell differentiation	2	5	12.1211	0.0407385	0.133689
GO:0045646	regulation of erythrocyte differentiation	2	5	12.1211	0.0407385	0.133689
GO:0045820	negative regulation of glycolysis	2	5	12.1211	0.0407385	0.133689
GO:0045908	negative regulation of vasodilation	2	5	12.1211	0.0407385	0.133689
GO:0045986	negative regulation of smooth muscle contraction	2	5	12.1211	0.0407385	0.133689
GO:0046324	regulation of glucose import	2	5	12.1211	0.0407385	0.133689
GO:0046879	hormone secretion	2	5	12.1211	0.0407385	0.133689
GO:0047497	mitochondrion transport along microtubule	2	5	12.1211	0.0407385	0.133689
GO:0048554	positive regulation of metalloenzyme activity	2	5	12.1211	0.0407385	0.133689
GO:0048808	male genitalia morphogenesis	2	5	12.1211	0.0407385	0.133689
GO:0050663	cytokine secretion	2	5	12.1211	0.0407385	0.133689
GO:0050869	negative regulation of B cell activation	2	5	12.1211	0.0407385	0.133689
GO:0051005	negative regulation of lipoprotein lipase activity	2	5	12.1211	0.0407385	0.133689
GO:0051101	regulation of DNA binding	2	5	12.1211	0.0407385	0.133689
GO:0051138	positive regulation of NK T cell differentiation	2	5	12.1211	0.0407385	0.133689
GO:0060033	anatomical structure regression	2	5	12.1211	0.0407385	0.133689
GO:0060179	male mating behavior	2	5	12.1211	0.0407385	0.133689
GO:0060666	dichotomous subdivision of terminal units involved in salivary gland branching	2	5	12.1211	0.0407385	0.133689
GO:0070365	hepatocyte differentiation	2	5	12.1211	0.0407385	0.133689
GO:0071493	cellular response to UV-B	2	5	12.1211	0.0407385	0.133689
GO:0090050	positive regulation of cell migration involved in sprouting angiogenesis	2	5	12.1211	0.0407385	0.133689
GO:0097070	ductus arteriosus closure	2	5	12.1211	0.0407385	0.133689
GO:1901998	toxin transport	2	5	12.1211	0.0407385	0.133689
GO:2000096	positive regulation of Wnt receptor signaling pathway, planar cell polarity pathway	2	5	12.1211	0.0407385	0.133689
GO:0051056	regulation of small GTPase mediated signal transduction	5	41	3.69545	0.0435338	0.142735
GO:0070098	chemokine-mediated signaling pathway	4	27	4.48929	0.0452731	0.148174
GO:0071456	cellular response to hypoxia	4	27	4.48929	0.0452731	0.148174
GO:0030326	embryonic limb morphogenesis	6	58	3.13476	0.0480707	0.156667
GO:0001967	suckling behavior	3	15	6.06054	0.0485064	0.156667
GO:0002244	hematopoietic progenitor cell differentiation	3	15	6.06054	0.0485064	0.156667
GO:0006855	drug transmembrane transport	3	15	6.06054	0.0485064	0.156667
GO:0006968	cellular defense response	3	15	6.06054	0.0485064	0.156667
GO:0008585	female gonad development	3	15	6.06054	0.0485064	0.156667
GO:0019226	transmission of nerve impulse	3	15	6.06054	0.0485064	0.156667
GO:0033365	protein localization to organelle	3	15	6.06054	0.0485064	0.156667
GO:0043011	myeloid dendritic cell differentiation	3	15	6.06054	0.0485064	0.156667
GO:0048598	embryonic morphogenesis	3	15	6.06054	0.0485064	0.156667
GO:0050868	negative regulation of T cell activation	3	15	6.06054	0.0485064	0.156667
GO:0060425	lung morphogenesis	3	15	6.06054	0.0485064	0.156667
GO:0060441	epithelial tube branching involved in lung morphogenesis	3	15	6.06054	0.0485064	0.156667
GO:0061298	retina vasculature development in camera-type eye	3	15	6.06054	0.0485064	0.156667
GO:2000811	negative regulation of anoikis	3	15	6.06054	0.0485064	0.156667
GO:0030336	negative regulation of cell migration	7	76	2.79104	0.0509797	0.164367
GO:0051091	positive regulation of sequence-specific DNA binding transcription factor activity	7	76	2.79104	0.0509797	0.164367
GO:0051289	protein homotetramerization	6	59	3.08163	0.052057	0.167694
GO:0045892	negative regulation of transcription, DNA-dependent	24	429	1.69526	0.0540447	0.173945
GO:0007595	lactation	4	29	4.17968	0.0581714	0.182652
GO:0010977	negative regulation of neuron projection development	4	29	4.17968	0.0581714	0.182652
GO:0030501	positive regulation of bone mineralization	4	29	4.17968	0.0581714	0.182652
GO:0045599	negative regulation of fat cell differentiation	4	29	4.17968	0.0581714	0.182652
GO:0006182	cGMP biosynthetic process	3	16	5.68176	0.0582554	0.182652
GO:0006904	vesicle docking involved in exocytosis	3	16	5.68176	0.0582554	0.182652
GO:0043330	response to exogenous dsRNA	3	16	5.68176	0.0582554	0.182652
GO:0043409	negative regulation of MAPK cascade	3	16	5.68176	0.0582554	0.182652
GO:0046856	phosphatidylinositol dephosphorylation	3	16	5.68176	0.0582554	0.182652
GO:0050910	detection of mechanical stimulus involved in sensory perception of sound	3	16	5.68176	0.0582554	0.182652
GO:0060707	trophoblast giant cell differentiation	3	16	5.68176	0.0582554	0.182652
GO:0072332	intrinsic apoptotic signaling pathway by p53 class mediator	3	16	5.68176	0.0582554	0.182652
GO:0097192	extrinsic apoptotic signaling pathway in absence of ligand	3	16	5.68176	0.0582554	0.182652
GO:0001696	gastric acid secretion	2	6	10.1009	0.0597761	0.182652
GO:0001913	T cell mediated cytotoxicity	2	6	10.1009	0.0597761	0.182652
GO:0002221	pattern recognition receptor signaling pathway	2	6	10.1009	0.0597761	0.182652
GO:0002639	positive regulation of immunoglobulin production	2	6	10.1009	0.0597761	0.182652
GO:0003094	glomerular filtration	2	6	10.1009	0.0597761	0.182652
GO:0003376	sphingosine-1-phosphate signaling pathway	2	6	10.1009	0.0597761	0.182652
GO:0006084	acetyl-CoA metabolic process	2	6	10.1009	0.0597761	0.182652
GO:0006491	N-glycan processing	2	6	10.1009	0.0597761	0.182652
GO:0007167	enzyme linked receptor protein signaling pathway	2	6	10.1009	0.0597761	0.182652
GO:0007182	common-partner SMAD protein phosphorylation	2	6	10.1009	0.0597761	0.182652
GO:0008064	regulation of actin polymerization or depolymerization	2	6	10.1009	0.0597761	0.182652
GO:0008593	regulation of Notch signaling pathway	2	6	10.1009	0.0597761	0.182652
GO:0009168	purine ribonucleoside monophosphate biosynthetic process	2	6	10.1009	0.0597761	0.182652
GO:0010828	positive regulation of glucose transport	2	6	10.1009	0.0597761	0.182652
GO:0010894	negative regulation of steroid biosynthetic process	2	6	10.1009	0.0597761	0.182652
GO:0021853	cerebral cortex GABAergic interneuron migration	2	6	10.1009	0.0597761	0.182652
GO:0022414	reproductive process	2	6	10.1009	0.0597761	0.182652
GO:0030388	fructose 1,6-bisphosphate metabolic process	2	6	10.1009	0.0597761	0.182652
GO:0031666	positive regulation of lipopolysaccharide-mediated signaling pathway	2	6	10.1009	0.0597761	0.182652
GO:0031915	positive regulation of synaptic plasticity	2	6	10.1009	0.0597761	0.182652
GO:0032060	bleb assembly	2	6	10.1009	0.0597761	0.182652
GO:0032481	positive regulation of type I interferon production	2	6	10.1009	0.0597761	0.182652
GO:0034379	very-low-density lipoprotein particle assembly	2	6	10.1009	0.0597761	0.182652
GO:0035457	cellular response to interferon-alpha	2	6	10.1009	0.0597761	0.182652
GO:0035640	exploration behavior	2	6	10.1009	0.0597761	0.182652
GO:0035729	cellular response to hepatocyte growth factor stimulus	2	6	10.1009	0.0597761	0.182652
GO:0042158	lipoprotein biosynthetic process	2	6	10.1009	0.0597761	0.182652
GO:0042308	negative regulation of protein import into nucleus	2	6	10.1009	0.0597761	0.182652
GO:0042347	negative regulation of NF-kappaB import into nucleus	2	6	10.1009	0.0597761	0.182652
GO:0042987	amyloid precursor protein catabolic process	2	6	10.1009	0.0597761	0.182652
GO:0043266	regulation of potassium ion transport	2	6	10.1009	0.0597761	0.182652
GO:0043269	regulation of ion transport	2	6	10.1009	0.0597761	0.182652
GO:0046785	microtubule polymerization	2	6	10.1009	0.0597761	0.182652
GO:0048251	elastic fiber assembly	2	6	10.1009	0.0597761	0.182652
GO:0048539	bone marrow development	2	6	10.1009	0.0597761	0.182652
GO:0050847	progesterone receptor signaling pathway	2	6	10.1009	0.0597761	0.182652
GO:0050848	regulation of calcium-mediated signaling	2	6	10.1009	0.0597761	0.182652
GO:0051279	regulation of release of sequestered calcium ion into cytosol	2	6	10.1009	0.0597761	0.182652
GO:0052033	pathogen-associated molecular pattern dependent induction by symbiont of host innate immune response	2	6	10.1009	0.0597761	0.182652
GO:0060087	relaxation of vascular smooth muscle	2	6	10.1009	0.0597761	0.182652
GO:0060463	lung lobe morphogenesis	2	6	10.1009	0.0597761	0.182652
GO:0060510	Type II pneumocyte differentiation	2	6	10.1009	0.0597761	0.182652
GO:0061179	negative regulation of insulin secretion involved in cellular response to glucose stimulus	2	6	10.1009	0.0597761	0.182652
GO:0070842	aggresome assembly	2	6	10.1009	0.0597761	0.182652
GO:0071229	cellular response to acid	2	6	10.1009	0.0597761	0.182652
GO:0071421	manganese ion transmembrane transport	2	6	10.1009	0.0597761	0.182652
GO:0072657	protein localization to membrane	2	6	10.1009	0.0597761	0.182652
GO:0090031	positive regulation of steroid hormone biosynthetic process	2	6	10.1009	0.0597761	0.182652
GO:0007283	spermatogenesis	17	274	1.8801	0.06212	0.189558
GO:0042593	glucose homeostasis	7	79	2.68505	0.0621391	0.189558
GO:0030216	keratinocyte differentiation	5	45	3.36697	0.0637377	0.194273
GO:0002062	chondrocyte differentiation	4	30	4.04036	0.0654052	0.199026
GO:0006953	acute-phase response	4	30	4.04036	0.0654052	0.199026
GO:0001954	positive regulation of cell-matrix adhesion	3	17	5.34754	0.06903	0.207824
GO:0006801	superoxide metabolic process	3	17	5.34754	0.06903	0.207824
GO:0007190	activation of adenylate cyclase activity	3	17	5.34754	0.06903	0.207824
GO:0007194	negative regulation of adenylate cyclase activity	3	17	5.34754	0.06903	0.207824
GO:0009409	response to cold	3	17	5.34754	0.06903	0.207824
GO:0014065	phosphatidylinositol 3-kinase cascade	3	17	5.34754	0.06903	0.207824
GO:0030100	regulation of endocytosis	3	17	5.34754	0.06903	0.207824
GO:0030325	adrenal gland development	3	17	5.34754	0.06903	0.207824
GO:0030539	male genitalia development	3	17	5.34754	0.06903	0.207824
GO:0043393	regulation of protein binding	3	17	5.34754	0.06903	0.207824
GO:0043536	positive regulation of blood vessel endothelial cell migration	3	17	5.34754	0.06903	0.207824
GO:0045987	positive regulation of smooth muscle contraction	3	17	5.34754	0.06903	0.207824
GO:0048565	digestive tract development	3	17	5.34754	0.06903	0.207824
GO:0007420	brain development	9	119	2.2918	0.0692557	0.208333
GO:0008630	intrinsic apoptotic signaling pathway in response to DNA damage	4	31	3.91003	0.0731779	0.219772
GO:0009611	response to wounding	4	31	3.91003	0.0731779	0.219772
GO:0050821	protein stabilization	6	64	2.84088	0.0754895	0.22653
GO:0030819	positive regulation of cAMP biosynthetic process	5	47	3.22369	0.0758472	0.227048
GO:0032869	cellular response to insulin stimulus	5	47	3.22369	0.0758472	0.227048
GO:0060271	cilium morphogenesis	5	47	3.22369	0.0758472	0.227048
GO:0003281	ventricular septum development	3	18	5.05045	0.0808386	0.232054
GO:0006509	membrane protein ectodomain proteolysis	3	18	5.05045	0.0808386	0.232054
GO:0007584	response to nutrient	3	18	5.05045	0.0808386	0.232054
GO:0010634	positive regulation of epithelial cell migration	3	18	5.05045	0.0808386	0.232054
GO:0032733	positive regulation of interleukin-10 production	3	18	5.05045	0.0808386	0.232054
GO:0042476	odontogenesis	3	18	5.05045	0.0808386	0.232054
GO:0045765	regulation of angiogenesis	3	18	5.05045	0.0808386	0.232054
GO:0048265	response to pain	3	18	5.05045	0.0808386	0.232054
GO:0051281	positive regulation of release of sequestered calcium ion into cytosol	3	18	5.05045	0.0808386	0.232054
GO:2000134	negative regulation of G1/S transition of mitotic cell cycle	3	18	5.05045	0.0808386	0.232054
GO:0009987	cellular process	4	32	3.78784	0.0814999	0.232054
GO:0014070	response to organic cyclic compound	4	32	3.78784	0.0814999	0.232054
GO:0001812	positive regulation of type I hypersensitivity	2	7	8.65792	0.081868	0.232054
GO:0002260	lymphocyte homeostasis	2	7	8.65792	0.081868	0.232054
GO:0002320	lymphoid progenitor cell differentiation	2	7	8.65792	0.081868	0.232054
GO:0002526	acute inflammatory response	2	7	8.65792	0.081868	0.232054
GO:0002674	negative regulation of acute inflammatory response	2	7	8.65792	0.081868	0.232054
GO:0002862	negative regulation of inflammatory response to antigenic stimulus	2	7	8.65792	0.081868	0.232054
GO:0003184	pulmonary valve morphogenesis	2	7	8.65792	0.081868	0.232054
GO:0003300	cardiac muscle hypertrophy	2	7	8.65792	0.081868	0.232054
GO:0006208	pyrimidine nucleobase catabolic process	2	7	8.65792	0.081868	0.232054
GO:0006857	oligopeptide transport	2	7	8.65792	0.081868	0.232054
GO:0006883	cellular sodium ion homeostasis	2	7	8.65792	0.081868	0.232054
GO:0007006	mitochondrial membrane organization	2	7	8.65792	0.081868	0.232054
GO:0007016	cytoskeletal anchoring at plasma membrane	2	7	8.65792	0.081868	0.232054
GO:0007196	adenylate cyclase-inhibiting G-protein coupled glutamate receptor signaling pathway	2	7	8.65792	0.081868	0.232054
GO:0007213	G-protein coupled acetylcholine receptor signaling pathway	2	7	8.65792	0.081868	0.232054
GO:0007217	tachykinin receptor signaling pathway	2	7	8.65792	0.081868	0.232054
GO:0008154	actin polymerization or depolymerization	2	7	8.65792	0.081868	0.232054
GO:0008635	activation of cysteine-type endopeptidase activity involved in apoptotic process by cytochrome c	2	7	8.65792	0.081868	0.232054
GO:0010881	regulation of cardiac muscle contraction by regulation of the release of sequestered calcium ion	2	7	8.65792	0.081868	0.232054
GO:0014050	negative regulation of glutamate secretion	2	7	8.65792	0.081868	0.232054
GO:0015884	folic acid transport	2	7	8.65792	0.081868	0.232054
GO:0017158	regulation of calcium ion-dependent exocytosis	2	7	8.65792	0.081868	0.232054
GO:0019227	neuronal action potential propagation	2	7	8.65792	0.081868	0.232054
GO:0021819	layer formation in cerebral cortex	2	7	8.65792	0.081868	0.232054
GO:0022027	interkinetic nuclear migration	2	7	8.65792	0.081868	0.232054
GO:0030098	lymphocyte differentiation	2	7	8.65792	0.081868	0.232054
GO:0030857	negative regulation of epithelial cell differentiation	2	7	8.65792	0.081868	0.232054
GO:0031536	positive regulation of exit from mitosis	2	7	8.65792	0.081868	0.232054
GO:0032228	regulation of synaptic transmission, GABAergic	2	7	8.65792	0.081868	0.232054
GO:0032570	response to progesterone stimulus	2	7	8.65792	0.081868	0.232054
GO:0032731	positive regulation of interleukin-1 beta production	2	7	8.65792	0.081868	0.232054
GO:0034314	Arp2/3 complex-mediated actin nucleation	2	7	8.65792	0.081868	0.232054
GO:0034501	protein localization to kinetochore	2	7	8.65792	0.081868	0.232054
GO:0034755	iron ion transmembrane transport	2	7	8.65792	0.081868	0.232054
GO:0042053	regulation of dopamine metabolic process	2	7	8.65792	0.081868	0.232054
GO:0042116	macrophage activation	2	7	8.65792	0.081868	0.232054
GO:0042178	xenobiotic catabolic process	2	7	8.65792	0.081868	0.232054
GO:0042596	fear response	2	7	8.65792	0.081868	0.232054
GO:0043576	regulation of respiratory gaseous exchange	2	7	8.65792	0.081868	0.232054
GO:0045359	positive regulation of interferon-beta biosynthetic process	2	7	8.65792	0.081868	0.232054
GO:0045945	positive regulation of transcription from RNA polymerase III promoter	2	7	8.65792	0.081868	0.232054
GO:0048645	organ formation	2	7	8.65792	0.081868	0.232054
GO:0048732	gland development	2	7	8.65792	0.081868	0.232054
GO:0050671	positive regulation of lymphocyte proliferation	2	7	8.65792	0.081868	0.232054
GO:0050810	regulation of steroid biosynthetic process	2	7	8.65792	0.081868	0.232054
GO:0051099	positive regulation of binding	2	7	8.65792	0.081868	0.232054
GO:0051443	positive regulation of ubiquitin-protein ligase activity	2	7	8.65792	0.081868	0.232054
GO:0051461	positive regulation of corticotropin secretion	2	7	8.65792	0.081868	0.232054
GO:0060013	righting reflex	2	7	8.65792	0.081868	0.232054
GO:0060158	phospholipase C-activating dopamine receptor signaling pathway	2	7	8.65792	0.081868	0.232054
GO:0060351	cartilage development involved in endochondral bone morphogenesis	2	7	8.65792	0.081868	0.232054
GO:0060429	epithelium development	2	7	8.65792	0.081868	0.232054
GO:0060710	chorio-allantoic fusion	2	7	8.65792	0.081868	0.232054
GO:0070493	thrombin receptor signaling pathway	2	7	8.65792	0.081868	0.232054
GO:0097028	dendritic cell differentiation	2	7	8.65792	0.081868	0.232054
GO:2000178	negative regulation of neural precursor cell proliferation	2	7	8.65792	0.081868	0.232054
GO:2001022	positive regulation of response to DNA damage stimulus	2	7	8.65792	0.081868	0.232054
GO:0001947	heart looping	5	49	3.09211	0.0893767	0.253142
GO:0007017	microtubule-based process	4	33	3.67306	0.0903801	0.255395
GO:0038032	termination of G-protein coupled receptor signaling pathway	4	33	3.67306	0.0903801	0.255395
GO:0043507	positive regulation of JUN kinase activity	4	33	3.67306	0.0903801	0.255395
GO:0001819	positive regulation of cytokine production	3	19	4.78464	0.0936855	0.26312
GO:0008089	anterograde axon cargo transport	3	19	4.78464	0.0936855	0.26312
GO:0016575	histone deacetylation	3	19	4.78464	0.0936855	0.26312
GO:0019370	leukotriene biosynthetic process	3	19	4.78464	0.0936855	0.26312
GO:0030279	negative regulation of ossification	3	19	4.78464	0.0936855	0.26312
GO:0042098	T cell proliferation	3	19	4.78464	0.0936855	0.26312
GO:0045930	negative regulation of mitotic cell cycle	3	19	4.78464	0.0936855	0.26312
GO:0050900	leukocyte migration	3	19	4.78464	0.0936855	0.26312
GO:0000082	G1/S transition of mitotic cell cycle	5	50	3.03027	0.0966908	0.271147
GO:0006464	cellular protein modification process	5	50	3.03027	0.0966908	0.271147
GO:0030514	negative regulation of BMP signaling pathway	4	34	3.56503	0.0998266	0.275407
GO:0040018	positive regulation of multicellular organism growth	4	34	3.56503	0.0998266	0.275407
GO:0006974	response to DNA damage stimulus	20	361	1.67882	0.100176	0.275407
GO:0001553	luteinization	2	8	7.57568	0.106792	0.275407
GO:0003016	respiratory system process	2	8	7.57568	0.106792	0.275407
GO:0003197	endocardial cushion development	2	8	7.57568	0.106792	0.275407
GO:0006828	manganese ion transport	2	8	7.57568	0.106792	0.275407
GO:0007158	neuron cell-cell adhesion	2	8	7.57568	0.106792	0.275407
GO:0007270	neuron-neuron synaptic transmission	2	8	7.57568	0.106792	0.275407
GO:0007341	penetration of zona pellucida	2	8	7.57568	0.106792	0.275407
GO:0010656	negative regulation of muscle cell apoptotic process	2	8	7.57568	0.106792	0.275407
GO:0010880	regulation of release of sequestered calcium ion into cytosol by sarcoplasmic reticulum	2	8	7.57568	0.106792	0.275407
GO:0015701	bicarbonate transport	2	8	7.57568	0.106792	0.275407
GO:0030814	regulation of cAMP metabolic process	2	8	7.57568	0.106792	0.275407
GO:0031284	positive regulation of guanylate cyclase activity	2	8	7.57568	0.106792	0.275407
GO:0032006	regulation of TOR signaling cascade	2	8	7.57568	0.106792	0.275407
GO:0032691	negative regulation of interleukin-1 beta production	2	8	7.57568	0.106792	0.275407
GO:0032700	negative regulation of interleukin-17 production	2	8	7.57568	0.106792	0.275407
GO:0032836	glomerular basement membrane development	2	8	7.57568	0.106792	0.275407
GO:0033210	leptin-mediated signaling pathway	2	8	7.57568	0.106792	0.275407
GO:0042994	cytoplasmic sequestering of transcription factor	2	8	7.57568	0.106792	0.275407
GO:0043297	apical junction assembly	2	8	7.57568	0.106792	0.275407
GO:0043569	negative regulation of insulin-like growth factor receptor signaling pathway	2	8	7.57568	0.106792	0.275407
GO:0045080	positive regulation of chemokine biosynthetic process	2	8	7.57568	0.106792	0.275407
GO:0045084	positive regulation of interleukin-12 biosynthetic process	2	8	7.57568	0.106792	0.275407
GO:0045410	positive regulation of interleukin-6 biosynthetic process	2	8	7.57568	0.106792	0.275407
GO:0045416	positive regulation of interleukin-8 biosynthetic process	2	8	7.57568	0.106792	0.275407
GO:0045823	positive regulation of heart contraction	2	8	7.57568	0.106792	0.275407
GO:0048245	eosinophil chemotaxis	2	8	7.57568	0.106792	0.275407
GO:0050965	detection of temperature stimulus involved in sensory perception of pain	2	8	7.57568	0.106792	0.275407
GO:0055089	fatty acid homeostasis	2	8	7.57568	0.106792	0.275407
GO:0055091	phospholipid homeostasis	2	8	7.57568	0.106792	0.275407
GO:0060044	negative regulation of cardiac muscle cell proliferation	2	8	7.57568	0.106792	0.275407
GO:0060136	embryonic process involved in female pregnancy	2	8	7.57568	0.106792	0.275407
GO:0060307	regulation of ventricular cardiac muscle cell membrane repolarization	2	8	7.57568	0.106792	0.275407
GO:0060324	face development	2	8	7.57568	0.106792	0.275407
GO:0060371	regulation of atrial cardiac muscle cell membrane depolarization	2	8	7.57568	0.106792	0.275407
GO:0060426	lung vasculature development	2	8	7.57568	0.106792	0.275407
GO:0060670	branching involved in labyrinthine layer morphogenesis	2	8	7.57568	0.106792	0.275407
GO:0061001	regulation of dendritic spine morphogenesis	2	8	7.57568	0.106792	0.275407
GO:0090129	positive regulation of synapse maturation	2	8	7.57568	0.106792	0.275407
GO:0090136	epithelial cell-cell adhesion	2	8	7.57568	0.106792	0.275407
GO:2000810	regulation of tight junction assembly	2	8	7.57568	0.106792	0.275407
GO:2001237	negative regulation of extrinsic apoptotic signaling pathway	2	8	7.57568	0.106792	0.275407
GO:0002026	regulation of the force of heart contraction	3	20	4.54541	0.107571	0.275407
GO:0006807	nitrogen compound metabolic process	3	20	4.54541	0.107571	0.275407
GO:0010001	glial cell differentiation	3	20	4.54541	0.107571	0.275407
GO:0030902	hindbrain development	3	20	4.54541	0.107571	0.275407
GO:0031648	protein destabilization	3	20	4.54541	0.107571	0.275407
GO:0035050	embryonic heart tube development	3	20	4.54541	0.107571	0.275407
GO:0045216	cell-cell junction organization	3	20	4.54541	0.107571	0.275407
GO:0046329	negative regulation of JNK cascade	3	20	4.54541	0.107571	0.275407
GO:0019722	calcium-mediated signaling	4	35	3.46317	0.109846	0.275407
GO:0032436	positive regulation of proteasomal ubiquitin-dependent protein catabolic process	4	35	3.46317	0.109846	0.275407
GO:0033077	T cell differentiation in thymus	4	35	3.46317	0.109846	0.275407
GO:0050790	regulation of catalytic activity	7	89	2.38336	0.111711	0.275407
GO:0006338	chromatin remodeling	5	52	2.91372	0.112446	0.275407
GO:0006952	defense response	8	110	2.20383	0.11804	0.275407
GO:0006096	glycolysis	4	36	3.36697	0.120443	0.275407
GO:0048666	neuron development	4	36	3.36697	0.120443	0.275407
GO:0001676	long-chain fatty acid metabolic process	3	21	4.32896	0.12249	0.275407
GO:0006094	gluconeogenesis	3	21	4.32896	0.12249	0.275407
GO:0030099	myeloid cell differentiation	3	21	4.32896	0.12249	0.275407
GO:0070059	intrinsic apoptotic signaling pathway in response to endoplasmic reticulum stress	3	21	4.32896	0.12249	0.275407
GO:0022900	electron transport chain	7	91	2.33098	0.124128	0.275407
GO:0001765	membrane raft assembly	1	1	30.3027	0.132001	0.275407
GO:0001787	natural killer cell proliferation	1	1	30.3027	0.132001	0.275407
GO:0001811	negative regulation of type I hypersensitivity	1	1	30.3027	0.132001	0.275407
GO:0001985	negative regulation of heart rate involved in baroreceptor response to increased systemic arterial blood pressure	1	1	30.3027	0.132001	0.275407
GO:0001988	positive regulation of heart rate involved in baroreceptor response to decreased systemic arterial blood pressure	1	1	30.3027	0.132001	0.275407
GO:0002030	inhibitory G-protein coupled receptor phosphorylation	1	1	30.3027	0.132001	0.275407
GO:0002041	intussusceptive angiogenesis	1	1	30.3027	0.132001	0.275407
GO:0002209	behavioral defense response	1	1	30.3027	0.132001	0.275407
GO:0002232	leukocyte chemotaxis involved in inflammatory response	1	1	30.3027	0.132001	0.275407
GO:0002313	mature B cell differentiation involved in immune response	1	1	30.3027	0.132001	0.275407
GO:0002314	germinal center B cell differentiation	1	1	30.3027	0.132001	0.275407
GO:0002316	follicular B cell differentiation	1	1	30.3027	0.132001	0.275407
GO:0002344	B cell affinity maturation	1	1	30.3027	0.132001	0.275407
GO:0002457	T cell antigen processing and presentation	1	1	30.3027	0.132001	0.275407
GO:0002460	adaptive immune response based on somatic recombination of immune receptors built from immunoglobulin superfamily domains	1	1	30.3027	0.132001	0.275407
GO:0002462	tolerance induction to nonself antigen	1	1	30.3027	0.132001	0.275407
GO:0002479	antigen processing and presentation of exogenous peptide antigen via MHC class I, TAP-dependent	1	1	30.3027	0.132001	0.275407
GO:0002525	acute inflammatory response to non-antigenic stimulus	1	1	30.3027	0.132001	0.275407
GO:0002543	activation of blood coagulation via clotting cascade	1	1	30.3027	0.132001	0.275407
GO:0002552	serotonin secretion by mast cell	1	1	30.3027	0.132001	0.275407
GO:0002581	negative regulation of antigen processing and presentation of peptide or polysaccharide antigen via MHC class II	1	1	30.3027	0.132001	0.275407
GO:0002588	positive regulation of antigen processing and presentation of peptide antigen via MHC class II	1	1	30.3027	0.132001	0.275407
GO:0002605	negative regulation of dendritic cell antigen processing and presentation	1	1	30.3027	0.132001	0.275407
GO:0002638	negative regulation of immunoglobulin production	1	1	30.3027	0.132001	0.275407
GO:0002651	positive regulation of tolerance induction to self antigen	1	1	30.3027	0.132001	0.275407
GO:0002663	positive regulation of B cell tolerance induction	1	1	30.3027	0.132001	0.275407
GO:0002668	negative regulation of T cell anergy	1	1	30.3027	0.132001	0.275407
GO:0002709	regulation of T cell mediated immunity	1	1	30.3027	0.132001	0.275407
GO:0002711	positive regulation of T cell mediated immunity	1	1	30.3027	0.132001	0.275407
GO:0002737	negative regulation of plasmacytoid dendritic cell cytokine production	1	1	30.3027	0.132001	0.275407
GO:0002774	Fc receptor mediated inhibitory signaling pathway	1	1	30.3027	0.132001	0.275407
GO:0002793	positive regulation of peptide secretion	1	1	30.3027	0.132001	0.275407
GO:0002828	regulation of type 2 immune response	1	1	30.3027	0.132001	0.275407
GO:0002866	positive regulation of acute inflammatory response to antigenic stimulus	1	1	30.3027	0.132001	0.275407
GO:0002923	regulation of humoral immune response mediated by circulating immunoglobulin	1	1	30.3027	0.132001	0.275407
GO:0003011	involuntary skeletal muscle contraction	1	1	30.3027	0.132001	0.275407
GO:0003106	negative regulation of glomerular filtration by angiotensin	1	1	30.3027	0.132001	0.275407
GO:0006021	inositol biosynthetic process	1	1	30.3027	0.132001	0.275407
GO:0006043	glucosamine catabolic process	1	1	30.3027	0.132001	0.275407
GO:0006051	N-acetylmannosamine metabolic process	1	1	30.3027	0.132001	0.275407
GO:0006127	glycerophosphate shuttle	1	1	30.3027	0.132001	0.275407
GO:0006157	deoxyadenosine catabolic process	1	1	30.3027	0.132001	0.275407
GO:0006185	dGDP biosynthetic process	1	1	30.3027	0.132001	0.275407
GO:0006196	AMP catabolic process	1	1	30.3027	0.132001	0.275407
GO:0006540	glutamate decarboxylation to succinate	1	1	30.3027	0.132001	0.275407
GO:0006581	acetylcholine catabolic process	1	1	30.3027	0.132001	0.275407
GO:0006682	galactosylceramide biosynthetic process	1	1	30.3027	0.132001	0.275407
GO:0006683	galactosylceramide catabolic process	1	1	30.3027	0.132001	0.275407
GO:0006743	ubiquinone metabolic process	1	1	30.3027	0.132001	0.275407
GO:0006848	pyruvate transport	1	1	30.3027	0.132001	0.275407
GO:0006860	extracellular amino acid transport	1	1	30.3027	0.132001	0.275407
GO:0006876	cellular cadmium ion homeostasis	1	1	30.3027	0.132001	0.275407
GO:0006948	induction by virus of host cell-cell fusion	1	1	30.3027	0.132001	0.275407
GO:0007100	mitotic centrosome separation	1	1	30.3027	0.132001	0.275407
GO:0007132	meiotic metaphase I	1	1	30.3027	0.132001	0.275407
GO:0007620	copulation	1	1	30.3027	0.132001	0.275407
GO:0009115	xanthine catabolic process	1	1	30.3027	0.132001	0.275407
GO:0009134	nucleoside diphosphate catabolic process	1	1	30.3027	0.132001	0.275407
GO:0009450	gamma-aminobutyric acid catabolic process	1	1	30.3027	0.132001	0.275407
GO:0009597	detection of virus	1	1	30.3027	0.132001	0.275407
GO:0009635	response to herbicide	1	1	30.3027	0.132001	0.275407
GO:0009817	defense response to fungus, incompatible interaction	1	1	30.3027	0.132001	0.275407
GO:0009855	determination of bilateral symmetry	1	1	30.3027	0.132001	0.275407
GO:0009956	radial pattern formation	1	1	30.3027	0.132001	0.275407
GO:0010046	response to mycotoxin	1	1	30.3027	0.132001	0.275407
GO:0010124	phenylacetate catabolic process	1	1	30.3027	0.132001	0.275407
GO:0010189	vitamin E biosynthetic process	1	1	30.3027	0.132001	0.275407
GO:0010269	response to selenium ion	1	1	30.3027	0.132001	0.275407
GO:0010312	detoxification of zinc ion	1	1	30.3027	0.132001	0.275407
GO:0010517	regulation of phospholipase activity	1	1	30.3027	0.132001	0.275407
GO:0010650	positive regulation of cell communication by electrical coupling	1	1	30.3027	0.132001	0.275407
GO:0010742	macrophage derived foam cell differentiation	1	1	30.3027	0.132001	0.275407
GO:0010752	regulation of cGMP-mediated signaling	1	1	30.3027	0.132001	0.275407
GO:0010754	negative regulation of cGMP-mediated signaling	1	1	30.3027	0.132001	0.275407
GO:0010758	regulation of macrophage chemotaxis	1	1	30.3027	0.132001	0.275407
GO:0010769	regulation of cell morphogenesis involved in differentiation	1	1	30.3027	0.132001	0.275407
GO:0010770	positive regulation of cell morphogenesis involved in differentiation	1	1	30.3027	0.132001	0.275407
GO:0010771	negative regulation of cell morphogenesis involved in differentiation	1	1	30.3027	0.132001	0.275407
GO:0010878	cholesterol storage	1	1	30.3027	0.132001	0.275407
GO:0010900	negative regulation of phosphatidylcholine catabolic process	1	1	30.3027	0.132001	0.275407
GO:0010920	negative regulation of inositol phosphate biosynthetic process	1	1	30.3027	0.132001	0.275407
GO:0010925	positive regulation of inositol-polyphosphate 5-phosphatase activity	1	1	30.3027	0.132001	0.275407
GO:0010933	positive regulation of macrophage tolerance induction	1	1	30.3027	0.132001	0.275407
GO:0014005	microglia development	1	1	30.3027	0.132001	0.275407
GO:0014074	response to purine-containing compound	1	1	30.3027	0.132001	0.275407
GO:0014739	positive regulation of muscle hyperplasia	1	1	30.3027	0.132001	0.275407
GO:0014812	muscle cell migration	1	1	30.3027	0.132001	0.275407
GO:0014820	tonic smooth muscle contraction	1	1	30.3027	0.132001	0.275407
GO:0014895	smooth muscle hypertrophy	1	1	30.3027	0.132001	0.275407
GO:0014896	muscle hypertrophy	1	1	30.3027	0.132001	0.275407
GO:0015707	nitrite transport	1	1	30.3027	0.132001	0.275407
GO:0015749	monosaccharide transport	1	1	30.3027	0.132001	0.275407
GO:0015794	glycerol-3-phosphate transport	1	1	30.3027	0.132001	0.275407
GO:0015812	gamma-aminobutyric acid transport	1	1	30.3027	0.132001	0.275407
GO:0015820	leucine transport	1	1	30.3027	0.132001	0.275407
GO:0015868	purine ribonucleotide transport	1	1	30.3027	0.132001	0.275407
GO:0016024	CDP-diacylglycerol biosynthetic process	1	1	30.3027	0.132001	0.275407
GO:0018009	N-terminal peptidyl-L-cysteine N-palmitoylation	1	1	30.3027	0.132001	0.275407
GO:0018153	isopeptide cross-linking via N6-(L-isoglutamyl)-L-lysine	1	1	30.3027	0.132001	0.275407
GO:0018277	protein deamination	1	1	30.3027	0.132001	0.275407
GO:0018400	peptidyl-proline hydroxylation to 3-hydroxy-L-proline	1	1	30.3027	0.132001	0.275407
GO:0018964	propylene metabolic process	1	1	30.3027	0.132001	0.275407
GO:0019102	male somatic sex determination	1	1	30.3027	0.132001	0.275407
GO:0019511	peptidyl-proline hydroxylation	1	1	30.3027	0.132001	0.275407
GO:0019521	D-gluconate metabolic process	1	1	30.3027	0.132001	0.275407
GO:0019730	antimicrobial humoral response	1	1	30.3027	0.132001	0.275407
GO:0021572	rhombomere 6 development	1	1	30.3027	0.132001	0.275407
GO:0021586	pons maturation	1	1	30.3027	0.132001	0.275407
GO:0021660	rhombomere 3 formation	1	1	30.3027	0.132001	0.275407
GO:0021666	rhombomere 5 formation	1	1	30.3027	0.132001	0.275407
GO:0021686	cerebellar granular layer maturation	1	1	30.3027	0.132001	0.275407
GO:0021771	lateral geniculate nucleus development	1	1	30.3027	0.132001	0.275407
GO:0021793	chemorepulsion of branchiomotor axon	1	1	30.3027	0.132001	0.275407
GO:0021813	cell-cell adhesion involved in neuronal-glial interactions involved in cerebral cortex radial glia guided migration	1	1	30.3027	0.132001	0.275407
GO:0021859	pyramidal neuron differentiation	1	1	30.3027	0.132001	0.275407
GO:0021920	regulation of transcription from RNA polymerase II promoter involved in spinal cord association neuron specification	1	1	30.3027	0.132001	0.275407
GO:0023057	negative regulation of signaling	1	1	30.3027	0.132001	0.275407
GO:0030258	lipid modification	1	1	30.3027	0.132001	0.275407
GO:0030705	cytoskeleton-dependent intracellular transport	1	1	30.3027	0.132001	0.275407
GO:0030817	regulation of cAMP biosynthetic process	1	1	30.3027	0.132001	0.275407
GO:0030826	regulation of cGMP biosynthetic process	1	1	30.3027	0.132001	0.275407
GO:0030845	phospholipase C-inhibiting G-protein coupled receptor signaling pathway	1	1	30.3027	0.132001	0.275407
GO:0031323	regulation of cellular metabolic process	1	1	30.3027	0.132001	0.275407
GO:0031577	spindle checkpoint	1	1	30.3027	0.132001	0.275407
GO:0031587	positive regulation of inositol 1,4,5-trisphosphate-sensitive calcium-release channel activity	1	1	30.3027	0.132001	0.275407
GO:0031960	response to corticosteroid stimulus	1	1	30.3027	0.132001	0.275407
GO:0032222	regulation of synaptic transmission, cholinergic	1	1	30.3027	0.132001	0.275407
GO:0032244	positive regulation of nucleoside transport	1	1	30.3027	0.132001	0.275407
GO:0032261	purine nucleotide salvage	1	1	30.3027	0.132001	0.275407
GO:0032273	positive regulation of protein polymerization	1	1	30.3027	0.132001	0.275407
GO:0032344	regulation of aldosterone metabolic process	1	1	30.3027	0.132001	0.275407
GO:0032366	intracellular sterol transport	1	1	30.3027	0.132001	0.275407
GO:0032368	regulation of lipid transport	1	1	30.3027	0.132001	0.275407
GO:0032383	regulation of intracellular cholesterol transport	1	1	30.3027	0.132001	0.275407
GO:0032514	positive regulation of protein phosphatase type 2B activity	1	1	30.3027	0.132001	0.275407
GO:0032594	protein transport within lipid bilayer	1	1	30.3027	0.132001	0.275407
GO:0032596	protein transport into membrane raft	1	1	30.3027	0.132001	0.275407
GO:0032632	interleukin-3 production	1	1	30.3027	0.132001	0.275407
GO:0032687	negative regulation of interferon-alpha production	1	1	30.3027	0.132001	0.275407
GO:0032765	positive regulation of mast cell cytokine production	1	1	30.3027	0.132001	0.275407
GO:0032769	negative regulation of monooxygenase activity	1	1	30.3027	0.132001	0.275407
GO:0032804	negative regulation of low-density lipoprotein particle receptor catabolic process	1	1	30.3027	0.132001	0.275407
GO:0032900	negative regulation of neurotrophin production	1	1	30.3027	0.132001	0.275407
GO:0032928	regulation of superoxide anion generation	1	1	30.3027	0.132001	0.275407
GO:0032943	mononuclear cell proliferation	1	1	30.3027	0.132001	0.275407
GO:0032960	regulation of inositol trisphosphate biosynthetic process	1	1	30.3027	0.132001	0.275407
GO:0033157	regulation of intracellular protein transport	1	1	30.3027	0.132001	0.275407
GO:0033301	cell cycle comprising mitosis without cytokinesis	1	1	30.3027	0.132001	0.275407
GO:0033371	T cell secretory granule organization	1	1	30.3027	0.132001	0.275407
GO:0033373	maintenance of protease location in mast cell secretory granule	1	1	30.3027	0.132001	0.275407
GO:0033382	maintenance of granzyme B location in T cell secretory granule	1	1	30.3027	0.132001	0.275407
GO:0033488	cholesterol biosynthetic process via 24,25-dihydrolanosterol	1	1	30.3027	0.132001	0.275407
GO:0033490	cholesterol biosynthetic process via lathosterol	1	1	30.3027	0.132001	0.275407
GO:0033693	neurofilament bundle assembly	1	1	30.3027	0.132001	0.275407
GO:0034126	positive regulation of MyD88-dependent toll-like receptor signaling pathway	1	1	30.3027	0.132001	0.275407
GO:0034130	toll-like receptor 1 signaling pathway	1	1	30.3027	0.132001	0.275407
GO:0034158	toll-like receptor 8 signaling pathway	1	1	30.3027	0.132001	0.275407
GO:0034164	negative regulation of toll-like receptor 9 signaling pathway	1	1	30.3027	0.132001	0.275407
GO:0034178	toll-like receptor 13 signaling pathway	1	1	30.3027	0.132001	0.275407
GO:0034198	cellular response to amino acid starvation	1	1	30.3027	0.132001	0.275407
GO:0034201	response to oleic acid	1	1	30.3027	0.132001	0.275407
GO:0034230	enkephalin processing	1	1	30.3027	0.132001	0.275407
GO:0034231	islet amyloid polypeptide processing	1	1	30.3027	0.132001	0.275407
GO:0034238	macrophage fusion	1	1	30.3027	0.132001	0.275407
GO:0034369	plasma lipoprotein particle remodeling	1	1	30.3027	0.132001	0.275407
GO:0034465	response to carbon monoxide	1	1	30.3027	0.132001	0.275407
GO:0035105	sterol regulatory element binding protein import into nucleus	1	1	30.3027	0.132001	0.275407
GO:0035470	positive regulation of vascular wound healing	1	1	30.3027	0.132001	0.275407
GO:0035499	carnosine biosynthetic process	1	1	30.3027	0.132001	0.275407
GO:0035505	positive regulation of myosin light chain kinase activity	1	1	30.3027	0.132001	0.275407
GO:0035509	negative regulation of myosin-light-chain-phosphatase activity	1	1	30.3027	0.132001	0.275407
GO:0035544	negative regulation of SNARE complex assembly	1	1	30.3027	0.132001	0.275407
GO:0035789	metanephric mesenchymal cell migration	1	1	30.3027	0.132001	0.275407
GO:0035790	platelet-derived growth factor receptor-alpha signaling pathway	1	1	30.3027	0.132001	0.275407
GO:0035791	platelet-derived growth factor receptor-beta signaling pathway	1	1	30.3027	0.132001	0.275407
GO:0035844	cloaca development	1	1	30.3027	0.132001	0.275407
GO:0035921	desmosome disassembly	1	1	30.3027	0.132001	0.275407
GO:0036292	DNA rewinding	1	1	30.3027	0.132001	0.275407
GO:0038027	apolipoprotein A-I-mediated signaling pathway	1	1	30.3027	0.132001	0.275407
GO:0038061	NIK/NF-kappaB cascade	1	1	30.3027	0.132001	0.275407
GO:0038089	positive regulation of cell migration by vascular endothelial growth factor signaling pathway	1	1	30.3027	0.132001	0.275407
GO:0038145	macrophage colony-stimulating factor signaling pathway	1	1	30.3027	0.132001	0.275407
GO:0039008	pronephric nephron tubule morphogenesis	1	1	30.3027	0.132001	0.275407
GO:0040040	thermosensory behavior	1	1	30.3027	0.132001	0.275407
GO:0042320	regulation of circadian sleep/wake cycle, REM sleep	1	1	30.3027	0.132001	0.275407
GO:0042340	keratan sulfate catabolic process	1	1	30.3027	0.132001	0.275407
GO:0042414	epinephrine metabolic process	1	1	30.3027	0.132001	0.275407
GO:0042512	negative regulation of tyrosine phosphorylation of Stat1 protein	1	1	30.3027	0.132001	0.275407
GO:0042659	regulation of cell fate specification	1	1	30.3027	0.132001	0.275407
GO:0042892	chloramphenicol transport	1	1	30.3027	0.132001	0.275407
GO:0042941	D-alanine transport	1	1	30.3027	0.132001	0.275407
GO:0042984	regulation of amyloid precursor protein biosynthetic process	1	1	30.3027	0.132001	0.275407
GO:0043091	L-arginine import	1	1	30.3027	0.132001	0.275407
GO:0043244	regulation of protein complex disassembly	1	1	30.3027	0.132001	0.275407
GO:0043378	positive regulation of CD8-positive, alpha-beta T cell differentiation	1	1	30.3027	0.132001	0.275407
GO:0043416	regulation of skeletal muscle tissue regeneration	1	1	30.3027	0.132001	0.275407
GO:0043697	cell dedifferentiation	1	1	30.3027	0.132001	0.275407
GO:0044254	multicellular organismal protein catabolic process	1	1	30.3027	0.132001	0.275407
GO:0044557	relaxation of smooth muscle	1	1	30.3027	0.132001	0.275407
GO:0045112	integrin biosynthetic process	1	1	30.3027	0.132001	0.275407
GO:0045113	regulation of integrin biosynthetic process	1	1	30.3027	0.132001	0.275407
GO:0045185	maintenance of protein location	1	1	30.3027	0.132001	0.275407
GO:0045234	protein palmitoleylation	1	1	30.3027	0.132001	0.275407
GO:0045299	otolith mineralization	1	1	30.3027	0.132001	0.275407
GO:0045338	farnesyl diphosphate metabolic process	1	1	30.3027	0.132001	0.275407
GO:0045342	MHC class II biosynthetic process	1	1	30.3027	0.132001	0.275407
GO:0045428	regulation of nitric oxide biosynthetic process	1	1	30.3027	0.132001	0.275407
GO:0045606	positive regulation of epidermal cell differentiation	1	1	30.3027	0.132001	0.275407
GO:0045659	negative regulation of neutrophil differentiation	1	1	30.3027	0.132001	0.275407
GO:0045660	positive regulation of neutrophil differentiation	1	1	30.3027	0.132001	0.275407
GO:0045720	negative regulation of integrin biosynthetic process	1	1	30.3027	0.132001	0.275407
GO:0045724	positive regulation of cilium assembly	1	1	30.3027	0.132001	0.275407
GO:0045769	negative regulation of asymmetric cell division	1	1	30.3027	0.132001	0.275407
GO:0045870	positive regulation of retroviral genome replication	1	1	30.3027	0.132001	0.275407
GO:0046054	dGMP metabolic process	1	1	30.3027	0.132001	0.275407
GO:0046058	cAMP metabolic process	1	1	30.3027	0.132001	0.275407
GO:0046061	dATP catabolic process	1	1	30.3027	0.132001	0.275407
GO:0046086	adenosine biosynthetic process	1	1	30.3027	0.132001	0.275407
GO:0046111	xanthine biosynthetic process	1	1	30.3027	0.132001	0.275407
GO:0046186	acetaldehyde biosynthetic process	1	1	30.3027	0.132001	0.275407
GO:0046635	positive regulation of alpha-beta T cell activation	1	1	30.3027	0.132001	0.275407
GO:0046670	positive regulation of retinal cell programmed cell death	1	1	30.3027	0.132001	0.275407
GO:0046711	GDP biosynthetic process	1	1	30.3027	0.132001	0.275407
GO:0046722	lactic acid secretion	1	1	30.3027	0.132001	0.275407
GO:0046877	regulation of saliva secretion	1	1	30.3027	0.132001	0.275407
GO:0046958	nonassociative learning	1	1	30.3027	0.132001	0.275407
GO:0048017	inositol lipid-mediated signaling	1	1	30.3027	0.132001	0.275407
GO:0048389	intermediate mesoderm development	1	1	30.3027	0.132001	0.275407
GO:0048553	negative regulation of metalloenzyme activity	1	1	30.3027	0.132001	0.275407
GO:0048691	positive regulation of axon extension involved in regeneration	1	1	30.3027	0.132001	0.275407
GO:0048790	maintenance of presynaptic active zone structure	1	1	30.3027	0.132001	0.275407
GO:0050674	urothelial cell proliferation	1	1	30.3027	0.132001	0.275407
GO:0050677	positive regulation of urothelial cell proliferation	1	1	30.3027	0.132001	0.275407
GO:0050760	negative regulation of thymidylate synthase biosynthetic process	1	1	30.3027	0.132001	0.275407
GO:0050812	regulation of acyl-CoA biosynthetic process	1	1	30.3027	0.132001	0.275407
GO:0050823	peptide antigen stabilization	1	1	30.3027	0.132001	0.275407
GO:0050857	positive regulation of antigen receptor-mediated signaling pathway	1	1	30.3027	0.132001	0.275407
GO:0050859	negative regulation of B cell receptor signaling pathway	1	1	30.3027	0.132001	0.275407
GO:0050865	regulation of cell activation	1	1	30.3027	0.132001	0.275407
GO:0050923	regulation of negative chemotaxis	1	1	30.3027	0.132001	0.275407
GO:0050928	negative regulation of positive chemotaxis	1	1	30.3027	0.132001	0.275407
GO:0051041	positive regulation of calcium-independent cell-cell adhesion	1	1	30.3027	0.132001	0.275407
GO:0051050	positive regulation of transport	1	1	30.3027	0.132001	0.275407
GO:0051126	negative regulation of actin nucleation	1	1	30.3027	0.132001	0.275407
GO:0051148	negative regulation of muscle cell differentiation	1	1	30.3027	0.132001	0.275407
GO:0051234	establishment of localization	1	1	30.3027	0.132001	0.275407
GO:0051251	positive regulation of lymphocyte activation	1	1	30.3027	0.132001	0.275407
GO:0051452	intracellular pH reduction	1	1	30.3027	0.132001	0.275407
GO:0051542	elastin biosynthetic process	1	1	30.3027	0.132001	0.275407
GO:0051585	negative regulation of dopamine uptake involved in synaptic transmission	1	1	30.3027	0.132001	0.275407
GO:0051622	negative regulation of norepinephrine uptake	1	1	30.3027	0.132001	0.275407
GO:0051694	pointed-end actin filament capping	1	1	30.3027	0.132001	0.275407
GO:0051758	homologous chromosome movement towards spindle pole involved in homologous chromosome segregation	1	1	30.3027	0.132001	0.275407
GO:0051939	gamma-aminobutyric acid import	1	1	30.3027	0.132001	0.275407
GO:0052063	induction by symbiont of defense-related host nitric oxide production	1	1	30.3027	0.132001	0.275407
GO:0052547	regulation of peptidase activity	1	1	30.3027	0.132001	0.275407
GO:0060004	reflex	1	1	30.3027	0.132001	0.275407
GO:0060082	eye blink reflex	1	1	30.3027	0.132001	0.275407
GO:0060168	positive regulation of adenosine receptor signaling pathway	1	1	30.3027	0.132001	0.275407
GO:0060169	negative regulation of adenosine receptor signaling pathway	1	1	30.3027	0.132001	0.275407
GO:0060280	negative regulation of ovulation	1	1	30.3027	0.132001	0.275407
GO:0060305	regulation of cell diameter	1	1	30.3027	0.132001	0.275407
GO:0060330	regulation of response to interferon-gamma	1	1	30.3027	0.132001	0.275407
GO:0060337	type I interferon-mediated signaling pathway	1	1	30.3027	0.132001	0.275407
GO:0060345	spleen trabecula formation	1	1	30.3027	0.132001	0.275407
GO:0060390	regulation of SMAD protein import into nucleus	1	1	30.3027	0.132001	0.275407
GO:0060405	regulation of penile erection	1	1	30.3027	0.132001	0.275407
GO:0060407	negative regulation of penile erection	1	1	30.3027	0.132001	0.275407
GO:0060436	bronchiole morphogenesis	1	1	30.3027	0.132001	0.275407
GO:0060496	mesenchymal-epithelial cell signaling involved in lung development	1	1	30.3027	0.132001	0.275407
GO:0060520	activation of prostate induction by androgen receptor signaling pathway	1	1	30.3027	0.132001	0.275407
GO:0060538	skeletal muscle organ development	1	1	30.3027	0.132001	0.275407
GO:0060661	submandibular salivary gland formation	1	1	30.3027	0.132001	0.275407
GO:0060681	branch elongation involved in ureteric bud branching	1	1	30.3027	0.132001	0.275407
GO:0060721	regulation of spongiotrophoblast cell proliferation	1	1	30.3027	0.132001	0.275407
GO:0060739	mesenchymal-epithelial cell signaling involved in prostate gland development	1	1	30.3027	0.132001	0.275407
GO:0060751	branch elongation involved in mammary gland duct branching	1	1	30.3027	0.132001	0.275407
GO:0060879	semicircular canal fusion	1	1	30.3027	0.132001	0.275407
GO:0060968	regulation of gene silencing	1	1	30.3027	0.132001	0.275407
GO:0060981	cell migration involved in coronary angiogenesis	1	1	30.3027	0.132001	0.275407
GO:0060988	lipid tube assembly	1	1	30.3027	0.132001	0.275407
GO:0061011	hepatic duct development	1	1	30.3027	0.132001	0.275407
GO:0061042	vascular wound healing	1	1	30.3027	0.132001	0.275407
GO:0061050	regulation of cell growth involved in cardiac muscle cell development	1	1	30.3027	0.132001	0.275407
GO:0061115	lung proximal/distal axis specification	1	1	30.3027	0.132001	0.275407
GO:0061143	alveolar primary septum development	1	1	30.3027	0.132001	0.275407
GO:0070075	tear secretion	1	1	30.3027	0.132001	0.275407
GO:0070164	negative regulation of adiponectin secretion	1	1	30.3027	0.132001	0.275407
GO:0070304	positive regulation of stress-activated protein kinase signaling cascade	1	1	30.3027	0.132001	0.275407
GO:0070352	positive regulation of white fat cell proliferation	1	1	30.3027	0.132001	0.275407
GO:0070495	negative regulation of thrombin receptor signaling pathway	1	1	30.3027	0.132001	0.275407
GO:0070560	protein secretion by platelet	1	1	30.3027	0.132001	0.275407
GO:0070563	negative regulation of vitamin D receptor signaling pathway	1	1	30.3027	0.132001	0.275407
GO:0070667	negative regulation of mast cell proliferation	1	1	30.3027	0.132001	0.275407
GO:0070839	divalent metal ion export	1	1	30.3027	0.132001	0.275407
GO:0070926	regulation of ATP:ADP antiporter activity	1	1	30.3027	0.132001	0.275407
GO:0071103	DNA conformation change	1	1	30.3027	0.132001	0.275407
GO:0071206	establishment of protein localization to juxtaparanode region of axon	1	1	30.3027	0.132001	0.275407
GO:0071228	cellular response to tumor cell	1	1	30.3027	0.132001	0.275407
GO:0071436	sodium ion export	1	1	30.3027	0.132001	0.275407
GO:0071449	cellular response to lipid hydroperoxide	1	1	30.3027	0.132001	0.275407
GO:0071464	cellular response to hydrostatic pressure	1	1	30.3027	0.132001	0.275407
GO:0071874	cellular response to norepinephrine stimulus	1	1	30.3027	0.132001	0.275407
GO:0072011	glomerular endothelium development	1	1	30.3027	0.132001	0.275407
GO:0072143	mesangial cell development	1	1	30.3027	0.132001	0.275407
GO:0072144	glomerular mesangial cell development	1	1	30.3027	0.132001	0.275407
GO:0072163	mesonephric epithelium development	1	1	30.3027	0.132001	0.275407
GO:0072168	specification of anterior mesonephric tubule identity	1	1	30.3027	0.132001	0.275407
GO:0072169	specification of posterior mesonephric tubule identity	1	1	30.3027	0.132001	0.275407
GO:0072183	negative regulation of nephron tubule epithelial cell differentiation	1	1	30.3027	0.132001	0.275407
GO:0072184	renal vesicle progenitor cell differentiation	1	1	30.3027	0.132001	0.275407
GO:0072190	ureter urothelium development	1	1	30.3027	0.132001	0.275407
GO:0072208	metanephric smooth muscle tissue development	1	1	30.3027	0.132001	0.275407
GO:0072234	metanephric nephron tubule development	1	1	30.3027	0.132001	0.275407
GO:0072239	metanephric glomerulus vasculature development	1	1	30.3027	0.132001	0.275407
GO:0072259	metanephric interstitial cell development	1	1	30.3027	0.132001	0.275407
GO:0072376	protein activation cascade	1	1	30.3027	0.132001	0.275407
GO:0072599	establishment of protein localization to endoplasmic reticulum	1	1	30.3027	0.132001	0.275407
GO:0072660	maintenance of protein location in plasma membrane	1	1	30.3027	0.132001	0.275407
GO:0080163	regulation of protein serine/threonine phosphatase activity	1	1	30.3027	0.132001	0.275407
GO:0086029	Purkinje myocyte to ventricular cardiac muscle cell signaling	1	1	30.3027	0.132001	0.275407
GO:0086094	positive regulation of ryanodine-sensitive calcium-release channel activity by adrenergic receptor signaling pathway involved in positive regulation of cardiac muscle contraction	1	1	30.3027	0.132001	0.275407
GO:0090025	regulation of monocyte chemotaxis	1	1	30.3027	0.132001	0.275407
GO:0090091	positive regulation of extracellular matrix disassembly	1	1	30.3027	0.132001	0.275407
GO:0090094	metanephric cap mesenchymal cell proliferation involved in metanephros development	1	1	30.3027	0.132001	0.275407
GO:0090096	positive regulation of metanephric cap mesenchymal cell proliferation	1	1	30.3027	0.132001	0.275407
GO:0090219	negative regulation of lipid kinase activity	1	1	30.3027	0.132001	0.275407
GO:0090237	regulation of arachidonic acid secretion	1	1	30.3027	0.132001	0.275407
GO:0090271	positive regulation of fibroblast growth factor production	1	1	30.3027	0.132001	0.275407
GO:0090273	regulation of somatostatin secretion	1	1	30.3027	0.132001	0.275407
GO:0097045	phosphatidylserine exposure on blood platelet	1	1	30.3027	0.132001	0.275407
GO:0097350	neutrophil clearance	1	1	30.3027	0.132001	0.275407
GO:0097369	sodium ion import	1	1	30.3027	0.132001	0.275407
GO:0097459	iron ion import into cell	1	1	30.3027	0.132001	0.275407
GO:1900107	regulation of nodal signaling pathway	1	1	30.3027	0.132001	0.275407
GO:1900119	positive regulation of execution phase of apoptosis	1	1	30.3027	0.132001	0.275407
GO:1900126	negative regulation of hyaluronan biosynthetic process	1	1	30.3027	0.132001	0.275407
GO:1900147	regulation of Schwann cell migration	1	1	30.3027	0.132001	0.275407
GO:1900163	positive regulation of phospholipid scramblase activity	1	1	30.3027	0.132001	0.275407
GO:1900225	regulation of NLRP3 inflammasome complex assembly	1	1	30.3027	0.132001	0.275407
GO:1900226	negative regulation of NLRP3 inflammasome complex assembly	1	1	30.3027	0.132001	0.275407
GO:1900275	negative regulation of phospholipase C activity	1	1	30.3027	0.132001	0.275407
GO:1900276	regulation of proteinase activated receptor activity	1	1	30.3027	0.132001	0.275407
GO:1900387	negative regulation of cell-cell adhesion by negative regulation of transcription from RNA polymerase II promoter	1	1	30.3027	0.132001	0.275407
GO:1900737	negative regulation of phospholipase C-activating G-protein coupled receptor signaling pathway	1	1	30.3027	0.132001	0.275407
GO:1900748	positive regulation of vascular endothelial growth factor signaling pathway	1	1	30.3027	0.132001	0.275407
GO:1901231	positive regulation of non-canonical Wnt receptor signaling pathway via JNK cascade	1	1	30.3027	0.132001	0.275407
GO:1901233	negative regulation of convergent extension involved in axis elongation	1	1	30.3027	0.132001	0.275407
GO:1901253	negative regulation of egress of virus within host cell	1	1	30.3027	0.132001	0.275407
GO:1901303	negative regulation of cargo loading into COPII-coated vesicle	1	1	30.3027	0.132001	0.275407
GO:1901666	positive regulation of NAD+ ADP-ribosyltransferase activity	1	1	30.3027	0.132001	0.275407
GO:1901860	positive regulation of mitochondrial DNA metabolic process	1	1	30.3027	0.132001	0.275407
GO:1901863	positive regulation of muscle tissue development	1	1	30.3027	0.132001	0.275407
GO:1901896	positive regulation of calcium-transporting ATPase activity	1	1	30.3027	0.132001	0.275407
GO:1902041	regulation of extrinsic apoptotic signaling pathway via death domain receptors	1	1	30.3027	0.132001	0.275407
GO:2000058	regulation of protein ubiquitination involved in ubiquitin-dependent protein catabolic process	1	1	30.3027	0.132001	0.275407
GO:2000095	regulation of Wnt receptor signaling pathway, planar cell polarity pathway	1	1	30.3027	0.132001	0.275407
GO:2000097	regulation of smooth muscle cell-matrix adhesion	1	1	30.3027	0.132001	0.275407
GO:2000119	negative regulation of sodium-dependent phosphate transport	1	1	30.3027	0.132001	0.275407
GO:2000194	regulation of female gonad development	1	1	30.3027	0.132001	0.275407
GO:2000212	negative regulation of glutamate metabolic process	1	1	30.3027	0.132001	0.275407
GO:2000296	negative regulation of hydrogen peroxide catabolic process	1	1	30.3027	0.132001	0.275407
GO:2000298	regulation of Rho-dependent protein serine/threonine kinase activity	1	1	30.3027	0.132001	0.275407
GO:2000323	negative regulation of glucocorticoid receptor signaling pathway	1	1	30.3027	0.132001	0.275407
GO:2000331	regulation of terminal button organization	1	1	30.3027	0.132001	0.275407
GO:2000345	regulation of hepatocyte proliferation	1	1	30.3027	0.132001	0.275407
GO:2000391	positive regulation of neutrophil extravasation	1	1	30.3027	0.132001	0.275407
GO:2000399	negative regulation of thymocyte aggregation	1	1	30.3027	0.132001	0.275407
GO:2000404	regulation of T cell migration	1	1	30.3027	0.132001	0.275407
GO:2000415	positive regulation of fibronectin-dependent thymocyte migration	1	1	30.3027	0.132001	0.275407
GO:2000418	positive regulation of eosinophil migration	1	1	30.3027	0.132001	0.275407
GO:2000564	regulation of CD8-positive, alpha-beta T cell proliferation	1	1	30.3027	0.132001	0.275407
GO:2000647	negative regulation of stem cell proliferation	1	1	30.3027	0.132001	0.275407
GO:2000670	positive regulation of dendritic cell apoptotic process	1	1	30.3027	0.132001	0.275407
GO:2000739	regulation of mesenchymal stem cell differentiation	1	1	30.3027	0.132001	0.275407
GO:2000753	positive regulation of glucosylceramide catabolic process	1	1	30.3027	0.132001	0.275407
GO:2000755	positive regulation of sphingomyelin catabolic process	1	1	30.3027	0.132001	0.275407
GO:2001135	regulation of endocytic recycling	1	1	30.3027	0.132001	0.275407
GO:2001213	negative regulation of vasculogenesis	1	1	30.3027	0.132001	0.275407
GO:2001242	regulation of intrinsic apoptotic signaling pathway	1	1	30.3027	0.132001	0.275407
GO:2001247	positive regulation of phosphatidylcholine biosynthetic process	1	1	30.3027	0.132001	0.275407
GO:0001763	morphogenesis of a branching structure	2	9	6.73394	0.134338	0.275407
GO:0001886	endothelial cell morphogenesis	2	9	6.73394	0.134338	0.275407
GO:0001973	adenosine receptor signaling pathway	2	9	6.73394	0.134338	0.275407
GO:0002021	response to dietary excess	2	9	6.73394	0.134338	0.275407
GO:0002504	antigen processing and presentation of peptide or polysaccharide antigen via MHC class II	2	9	6.73394	0.134338	0.275407
GO:0003143	embryonic heart tube morphogenesis	2	9	6.73394	0.134338	0.275407
GO:0006024	glycosaminoglycan biosynthetic process	2	9	6.73394	0.134338	0.275407
GO:0006090	pyruvate metabolic process	2	9	6.73394	0.134338	0.275407
GO:0006809	nitric oxide biosynthetic process	2	9	6.73394	0.134338	0.275407
GO:0006884	cell volume homeostasis	2	9	6.73394	0.134338	0.275407
GO:0007095	mitotic G2 DNA damage checkpoint	2	9	6.73394	0.134338	0.275407
GO:0009100	glycoprotein metabolic process	2	9	6.73394	0.134338	0.275407
GO:0009311	oligosaccharide metabolic process	2	9	6.73394	0.134338	0.275407
GO:0009404	toxin metabolic process	2	9	6.73394	0.134338	0.275407
GO:0019953	sexual reproduction	2	9	6.73394	0.134338	0.275407
GO:0030166	proteoglycan biosynthetic process	2	9	6.73394	0.134338	0.275407
GO:0030854	positive regulation of granulocyte differentiation	2	9	6.73394	0.134338	0.275407
GO:0031017	exocrine pancreas development	2	9	6.73394	0.134338	0.275407
GO:0032319	regulation of Rho GTPase activity	2	9	6.73394	0.134338	0.275407
GO:0032825	positive regulation of natural killer cell differentiation	2	9	6.73394	0.134338	0.275407
GO:0033690	positive regulation of osteoblast proliferation	2	9	6.73394	0.134338	0.275407
GO:0035313	wound healing, spreading of epidermal cells	2	9	6.73394	0.134338	0.275407
GO:0035584	calcium-mediated signaling using intracellular calcium source	2	9	6.73394	0.134338	0.275407
GO:0042312	regulation of vasodilation	2	9	6.73394	0.134338	0.275407
GO:0045651	positive regulation of macrophage differentiation	2	9	6.73394	0.134338	0.275407
GO:0045717	negative regulation of fatty acid biosynthetic process	2	9	6.73394	0.134338	0.275407
GO:0045741	positive regulation of epidermal growth factor-activated receptor activity	2	9	6.73394	0.134338	0.275407
GO:0045822	negative regulation of heart contraction	2	9	6.73394	0.134338	0.275407
GO:0046085	adenosine metabolic process	2	9	6.73394	0.134338	0.275407
GO:0046415	urate metabolic process	2	9	6.73394	0.134338	0.275407
GO:0046628	positive regulation of insulin receptor signaling pathway	2	9	6.73394	0.134338	0.275407
GO:0046638	positive regulation of alpha-beta T cell differentiation	2	9	6.73394	0.134338	0.275407
GO:0048843	negative regulation of axon extension involved in axon guidance	2	9	6.73394	0.134338	0.275407
GO:0060124	positive regulation of growth hormone secretion	2	9	6.73394	0.134338	0.275407
GO:0061032	visceral serous pericardium development	2	9	6.73394	0.134338	0.275407
GO:0090026	positive regulation of monocyte chemotaxis	2	9	6.73394	0.134338	0.275407
GO:2000147	positive regulation of cell motility	2	9	6.73394	0.134338	0.275407
GO:0032689	negative regulation of interferon-gamma production	3	22	4.13219	0.138436	0.283494
GO:0042311	vasodilation	3	22	4.13219	0.138436	0.283494
GO:0045454	cell redox homeostasis	5	55	2.75479	0.138973	0.284434
GO:0001843	neural tube closure	6	74	2.45698	0.141913	0.29029
GO:0001890	placenta development	4	38	3.18976	0.143389	0.292821
GO:0008643	carbohydrate transport	4	38	3.18976	0.143389	0.292821
GO:0030317	sperm motility	4	38	3.18976	0.143389	0.292821
GO:0060041	retina development in camera-type eye	5	56	2.7056	0.148602	0.3033
GO:0001958	endochondral ossification	3	23	3.95253	0.155399	0.316468
GO:0006259	DNA metabolic process	3	23	3.95253	0.155399	0.316468
GO:0048147	negative regulation of fibroblast proliferation	3	23	3.95253	0.155399	0.316468
GO:0051297	centrosome organization	3	23	3.95253	0.155399	0.316468
GO:0001932	regulation of protein phosphorylation	4	39	3.10797	0.155742	0.316468
GO:0007030	Golgi organization	4	39	3.10797	0.155742	0.316468
GO:0008544	epidermis development	4	39	3.10797	0.155742	0.316468
GO:0032024	positive regulation of insulin secretion	4	39	3.10797	0.155742	0.316468
GO:0000266	mitochondrial fission	2	10	6.06054	0.164305	0.327897
GO:0000904	cell morphogenesis involved in differentiation	2	10	6.06054	0.164305	0.327897
GO:0001523	retinoid metabolic process	2	10	6.06054	0.164305	0.327897
GO:0002827	positive regulation of T-helper 1 type immune response	2	10	6.06054	0.164305	0.327897
GO:0006584	catecholamine metabolic process	2	10	6.06054	0.164305	0.327897
GO:0006839	mitochondrial transport	2	10	6.06054	0.164305	0.327897
GO:0010812	negative regulation of cell-substrate adhesion	2	10	6.06054	0.164305	0.327897
GO:0014902	myotube differentiation	2	10	6.06054	0.164305	0.327897
GO:0015672	monovalent inorganic cation transport	2	10	6.06054	0.164305	0.327897
GO:0015695	organic cation transport	2	10	6.06054	0.164305	0.327897
GO:0016050	vesicle organization	2	10	6.06054	0.164305	0.327897
GO:0021799	cerebral cortex radially oriented cell migration	2	10	6.06054	0.164305	0.327897
GO:0022904	respiratory electron transport chain	2	10	6.06054	0.164305	0.327897
GO:0030041	actin filament polymerization	2	10	6.06054	0.164305	0.327897
GO:0030220	platelet formation	2	10	6.06054	0.164305	0.327897
GO:0031953	negative regulation of protein autophosphorylation	2	10	6.06054	0.164305	0.327897
GO:0032456	endocytic recycling	2	10	6.06054	0.164305	0.327897
GO:0032740	positive regulation of interleukin-17 production	2	10	6.06054	0.164305	0.327897
GO:0032863	activation of Rac GTPase activity	2	10	6.06054	0.164305	0.327897
GO:0033148	positive regulation of intracellular estrogen receptor signaling pathway	2	10	6.06054	0.164305	0.327897
GO:0033327	Leydig cell differentiation	2	10	6.06054	0.164305	0.327897
GO:0035413	positive regulation of catenin import into nucleus	2	10	6.06054	0.164305	0.327897
GO:0043403	skeletal muscle tissue regeneration	2	10	6.06054	0.164305	0.327897
GO:0043589	skin morphogenesis	2	10	6.06054	0.164305	0.327897
GO:0044344	cellular response to fibroblast growth factor stimulus	2	10	6.06054	0.164305	0.327897
GO:0045779	negative regulation of bone resorption	2	10	6.06054	0.164305	0.327897
GO:0046548	retinal rod cell development	2	10	6.06054	0.164305	0.327897
GO:0048703	embryonic viscerocranium morphogenesis	2	10	6.06054	0.164305	0.327897
GO:0050771	negative regulation of axonogenesis	2	10	6.06054	0.164305	0.327897
GO:0050832	defense response to fungus	2	10	6.06054	0.164305	0.327897
GO:0060413	atrial septum morphogenesis	2	10	6.06054	0.164305	0.327897
GO:0061136	regulation of proteasomal protein catabolic process	2	10	6.06054	0.164305	0.327897
GO:2000060	positive regulation of protein ubiquitination involved in ubiquitin-dependent protein catabolic process	2	10	6.06054	0.164305	0.327897
GO:0010629	negative regulation of gene expression	9	130	2.09788	0.165775	0.330652
GO:0009411	response to UV	4	40	3.03027	0.168683	0.33627
GO:0006357	regulation of transcription from RNA polymerase II promoter	14	241	1.76032	0.17274	0.344171
GO:0034976	response to endoplasmic reticulum stress	3	24	3.78784	0.173365	0.34523
GO:0006986	response to unfolded protein	4	41	2.95636	0.182213	0.362456
GO:0071363	cellular response to growth factor stimulus	4	41	2.95636	0.182213	0.362456
GO:0001824	blastocyst development	3	25	3.63633	0.192318	0.380707
GO:0006754	ATP biosynthetic process	3	25	3.63633	0.192318	0.380707
GO:0016571	histone methylation	3	25	3.63633	0.192318	0.380707
GO:0031016	pancreas development	3	25	3.63633	0.192318	0.380707
GO:0045909	positive regulation of vasodilation	3	25	3.63633	0.192318	0.380707
GO:0048477	oogenesis	3	25	3.63633	0.192318	0.380707
GO:0050769	positive regulation of neurogenesis	3	25	3.63633	0.192318	0.380707
GO:0051496	positive regulation of stress fiber assembly	3	25	3.63633	0.192318	0.380707
GO:0072593	reactive oxygen species metabolic process	3	25	3.63633	0.192318	0.380707
GO:0030218	erythrocyte differentiation	4	42	2.88597	0.196329	0.382615
GO:0035335	peptidyl-tyrosine dephosphorylation	4	42	2.88597	0.196329	0.382615
GO:0001542	ovulation from ovarian follicle	2	11	5.50958	0.196503	0.382615
GO:0001945	lymph vessel development	2	11	5.50958	0.196503	0.382615
GO:0006107	oxaloacetate metabolic process	2	11	5.50958	0.196503	0.382615
GO:0008631	intrinsic apoptotic signaling pathway in response to oxidative stress	2	11	5.50958	0.196503	0.382615
GO:0010867	positive regulation of triglyceride biosynthetic process	2	11	5.50958	0.196503	0.382615
GO:0010875	positive regulation of cholesterol efflux	2	11	5.50958	0.196503	0.382615
GO:0021952	central nervous system projection neuron axonogenesis	2	11	5.50958	0.196503	0.382615
GO:0030031	cell projection assembly	2	11	5.50958	0.196503	0.382615
GO:0030815	negative regulation of cAMP metabolic process	2	11	5.50958	0.196503	0.382615
GO:0031571	mitotic G1 DNA damage checkpoint	2	11	5.50958	0.196503	0.382615
GO:0032230	positive regulation of synaptic transmission, GABAergic	2	11	5.50958	0.196503	0.382615
GO:0040037	negative regulation of fibroblast growth factor receptor signaling pathway	2	11	5.50958	0.196503	0.382615
GO:0042149	cellular response to glucose starvation	2	11	5.50958	0.196503	0.382615
GO:0043069	negative regulation of programmed cell death	2	11	5.50958	0.196503	0.382615
GO:0043116	negative regulation of vascular permeability	2	11	5.50958	0.196503	0.382615
GO:0043306	positive regulation of mast cell degranulation	2	11	5.50958	0.196503	0.382615
GO:0043518	negative regulation of DNA damage response, signal transduction by p53 class mediator	2	11	5.50958	0.196503	0.382615
GO:0045744	negative regulation of G-protein coupled receptor protein signaling pathway	2	11	5.50958	0.196503	0.382615
GO:0048545	response to steroid hormone stimulus	2	11	5.50958	0.196503	0.382615
GO:0050709	negative regulation of protein secretion	2	11	5.50958	0.196503	0.382615
GO:0050860	negative regulation of T cell receptor signaling pathway	2	11	5.50958	0.196503	0.382615
GO:0050966	detection of mechanical stimulus involved in sensory perception of pain	2	11	5.50958	0.196503	0.382615
GO:0051000	positive regulation of nitric-oxide synthase activity	2	11	5.50958	0.196503	0.382615
GO:0051497	negative regulation of stress fiber assembly	2	11	5.50958	0.196503	0.382615
GO:0055003	cardiac myofibril assembly	2	11	5.50958	0.196503	0.382615
GO:0060042	retina morphogenesis in camera-type eye	2	11	5.50958	0.196503	0.382615
GO:0060322	head development	2	11	5.50958	0.196503	0.382615
GO:0086005	regulation of ventricular cardiac muscle cell action potential	2	11	5.50958	0.196503	0.382615
GO:0090201	negative regulation of release of cytochrome c from mitochondria	2	11	5.50958	0.196503	0.382615
GO:0043473	pigmentation	4	43	2.81886	0.211031	0.410685
GO:0006829	zinc ion transport	3	26	3.49647	0.21224	0.412167
GO:0030032	lamellipodium assembly	3	26	3.49647	0.21224	0.412167
GO:0030968	endoplasmic reticulum unfolded protein response	3	26	3.49647	0.21224	0.412167
GO:0046034	ATP metabolic process	3	26	3.49647	0.21224	0.412167
GO:0035023	regulation of Rho protein signal transduction	5	62	2.44377	0.21483	0.416976
GO:0001678	cellular glucose homeostasis	2	12	5.05045	0.230754	0.424712
GO:0006198	cAMP catabolic process	2	12	5.05045	0.230754	0.424712
GO:0006750	glutathione biosynthetic process	2	12	5.05045	0.230754	0.424712
GO:0009306	protein secretion	2	12	5.05045	0.230754	0.424712
GO:0010469	regulation of receptor activity	2	12	5.05045	0.230754	0.424712
GO:0010506	regulation of autophagy	2	12	5.05045	0.230754	0.424712
GO:0015908	fatty acid transport	2	12	5.05045	0.230754	0.424712
GO:0030278	regulation of ossification	2	12	5.05045	0.230754	0.424712
GO:0030837	negative regulation of actin filament polymerization	2	12	5.05045	0.230754	0.424712
GO:0031333	negative regulation of protein complex assembly	2	12	5.05045	0.230754	0.424712
GO:0032270	positive regulation of cellular protein metabolic process	2	12	5.05045	0.230754	0.424712
GO:0035418	protein localization to synapse	2	12	5.05045	0.230754	0.424712
GO:0035855	megakaryocyte development	2	12	5.05045	0.230754	0.424712
GO:0042574	retinal metabolic process	2	12	5.05045	0.230754	0.424712
GO:0043691	reverse cholesterol transport	2	12	5.05045	0.230754	0.424712
GO:0045086	positive regulation of interleukin-2 biosynthetic process	2	12	5.05045	0.230754	0.424712
GO:0045663	positive regulation of myoblast differentiation	2	12	5.05045	0.230754	0.424712
GO:0045667	regulation of osteoblast differentiation	2	12	5.05045	0.230754	0.424712
GO:0046622	positive regulation of organ growth	2	12	5.05045	0.230754	0.424712
GO:0048255	mRNA stabilization	2	12	5.05045	0.230754	0.424712
GO:0050919	negative chemotaxis	2	12	5.05045	0.230754	0.424712
GO:0051770	positive regulation of nitric-oxide synthase biosynthetic process	2	12	5.05045	0.230754	0.424712
GO:0060047	heart contraction	2	12	5.05045	0.230754	0.424712
GO:0060272	embryonic skeletal joint morphogenesis	2	12	5.05045	0.230754	0.424712
GO:0070498	interleukin-1-mediated signaling pathway	2	12	5.05045	0.230754	0.424712
GO:0071364	cellular response to epidermal growth factor stimulus	2	12	5.05045	0.230754	0.424712
GO:1900087	positive regulation of G1/S transition of mitotic cell cycle	2	12	5.05045	0.230754	0.424712
GO:2000045	regulation of G1/S transition of mitotic cell cycle	2	12	5.05045	0.230754	0.424712
GO:2000378	negative regulation of reactive oxygen species metabolic process	2	12	5.05045	0.230754	0.424712
GO:0001654	eye development	3	27	3.36697	0.233111	0.424712
GO:0032091	negative regulation of protein binding	3	27	3.36697	0.233111	0.424712
GO:0051603	proteolysis involved in cellular protein catabolic process	3	27	3.36697	0.233111	0.424712
GO:0006479	protein methylation	3	28	3.24672	0.254909	0.424712
GO:0008277	regulation of G-protein coupled receptor protein signaling pathway	3	28	3.24672	0.254909	0.424712
GO:0015758	glucose transport	3	28	3.24672	0.254909	0.424712
GO:0016197	endosomal transport	3	28	3.24672	0.254909	0.424712
GO:0034504	protein localization to nucleus	3	28	3.24672	0.254909	0.424712
GO:0046326	positive regulation of glucose import	3	28	3.24672	0.254909	0.424712
GO:0048863	stem cell differentiation	3	28	3.24672	0.254909	0.424712
GO:0045668	negative regulation of osteoblast differentiation	4	46	2.63502	0.258609	0.424712
GO:0000212	meiotic spindle organization	1	2	15.1514	0.259649	0.424712
GO:0000236	mitotic prometaphase	1	2	15.1514	0.259649	0.424712
GO:0001504	neurotransmitter uptake	1	2	15.1514	0.259649	0.424712
GO:0001546	preantral ovarian follicle growth	1	2	15.1514	0.259649	0.424712
GO:0001869	negative regulation of complement activation, lectin pathway	1	2	15.1514	0.259649	0.424712
GO:0001879	detection of yeast	1	2	15.1514	0.259649	0.424712
GO:0001949	sebaceous gland cell differentiation	1	2	15.1514	0.259649	0.424712
GO:0002268	follicular dendritic cell differentiation	1	2	15.1514	0.259649	0.424712
GO:0002277	myeloid dendritic cell activation involved in immune response	1	2	15.1514	0.259649	0.424712
GO:0002291	T cell activation via T cell receptor contact with antigen bound to MHC molecule on antigen presenting cell	1	2	15.1514	0.259649	0.424712
GO:0002296	T-helper 1 cell lineage commitment	1	2	15.1514	0.259649	0.424712
GO:0002322	B cell proliferation involved in immune response	1	2	15.1514	0.259649	0.424712
GO:0002352	B cell negative selection	1	2	15.1514	0.259649	0.424712
GO:0002367	cytokine production involved in immune response	1	2	15.1514	0.259649	0.424712
GO:0002369	T cell cytokine production	1	2	15.1514	0.259649	0.424712
GO:0002378	immunoglobulin biosynthetic process	1	2	15.1514	0.259649	0.424712
GO:0002426	immunoglobulin production in mucosal tissue	1	2	15.1514	0.259649	0.424712
GO:0002532	production of molecular mediator involved in inflammatory response	1	2	15.1514	0.259649	0.424712
GO:0002540	leukotriene production involved in inflammatory response	1	2	15.1514	0.259649	0.424712
GO:0002572	pro-T cell differentiation	1	2	15.1514	0.259649	0.424712
GO:0002579	positive regulation of antigen processing and presentation	1	2	15.1514	0.259649	0.424712
GO:0002679	respiratory burst involved in defense response	1	2	15.1514	0.259649	0.424712
GO:0002790	peptide secretion	1	2	15.1514	0.259649	0.424712
GO:0002820	negative regulation of adaptive immune response	1	2	15.1514	0.259649	0.424712
GO:0002826	negative regulation of T-helper 1 type immune response	1	2	15.1514	0.259649	0.424712
GO:0002902	regulation of B cell apoptotic process	1	2	15.1514	0.259649	0.424712
GO:0002920	regulation of humoral immune response	1	2	15.1514	0.259649	0.424712
GO:0003057	regulation of the force of heart contraction by chemical signal	1	2	15.1514	0.259649	0.424712
GO:0003093	regulation of glomerular filtration	1	2	15.1514	0.259649	0.424712
GO:0003127	detection of nodal flow	1	2	15.1514	0.259649	0.424712
GO:0003158	endothelium development	1	2	15.1514	0.259649	0.424712
GO:0003220	left ventricular cardiac muscle tissue morphogenesis	1	2	15.1514	0.259649	0.424712
GO:0005989	lactose biosynthetic process	1	2	15.1514	0.259649	0.424712
GO:0006041	glucosamine metabolic process	1	2	15.1514	0.259649	0.424712
GO:0006083	acetate metabolic process	1	2	15.1514	0.259649	0.424712
GO:0006114	glycerol biosynthetic process	1	2	15.1514	0.259649	0.424712
GO:0006154	adenosine catabolic process	1	2	15.1514	0.259649	0.424712
GO:0006452	translational frameshifting	1	2	15.1514	0.259649	0.424712
GO:0006529	asparagine biosynthetic process	1	2	15.1514	0.259649	0.424712
GO:0006532	aspartate biosynthetic process	1	2	15.1514	0.259649	0.424712
GO:0006570	tyrosine metabolic process	1	2	15.1514	0.259649	0.424712
GO:0006638	neutral lipid metabolic process	1	2	15.1514	0.259649	0.424712
GO:0006649	phospholipid transfer to membrane	1	2	15.1514	0.259649	0.424712
GO:0006650	glycerophospholipid metabolic process	1	2	15.1514	0.259649	0.424712
GO:0006678	glucosylceramide metabolic process	1	2	15.1514	0.259649	0.424712
GO:0006681	galactosylceramide metabolic process	1	2	15.1514	0.259649	0.424712
GO:0006720	isoprenoid metabolic process	1	2	15.1514	0.259649	0.424712
GO:0006782	protoporphyrinogen IX biosynthetic process	1	2	15.1514	0.259649	0.424712
GO:0006903	vesicle targeting	1	2	15.1514	0.259649	0.424712
GO:0006982	response to lipid hydroperoxide	1	2	15.1514	0.259649	0.424712
GO:0006991	response to sterol depletion	1	2	15.1514	0.259649	0.424712
GO:0007033	vacuole organization	1	2	15.1514	0.259649	0.424712
GO:0007092	activation of mitotic anaphase-promoting complex activity	1	2	15.1514	0.259649	0.424712
GO:0007172	signal complex assembly	1	2	15.1514	0.259649	0.424712
GO:0007185	transmembrane receptor protein tyrosine phosphatase signaling pathway	1	2	15.1514	0.259649	0.424712
GO:0007423	sensory organ development	1	2	15.1514	0.259649	0.424712
GO:0008049	male courtship behavior	1	2	15.1514	0.259649	0.424712
GO:0008627	intrinsic apoptotic signaling pathway in response to osmotic stress	1	2	15.1514	0.259649	0.424712
GO:0009181	purine ribonucleoside diphosphate catabolic process	1	2	15.1514	0.259649	0.424712
GO:0009449	gamma-aminobutyric acid biosynthetic process	1	2	15.1514	0.259649	0.424712
GO:0009609	response to symbiotic bacterium	1	2	15.1514	0.259649	0.424712
GO:0010044	response to aluminum ion	1	2	15.1514	0.259649	0.424712
[truncated: 1,683 more rows]

## Sheet: sheet 2
go_id	go_name	enrichment	pvalue	FDR	gene_id	gene_name
GO:0006810	transport	4.47815	4.49779e-91	1.65609e-87	66616	Snx9
GO:0006810	transport	4.47815	4.49779e-91	1.65609e-87	20513	Slc1a6
GO:0006810	transport	4.47815	4.49779e-91	1.65609e-87	18439	P2rx7
GO:0006810	transport	4.47815	4.49779e-91	1.65609e-87	11303	Abca1
GO:0006810	transport	4.47815	4.49779e-91	1.65609e-87	12904	Crabp2
GO:0006810	transport	4.47815	4.49779e-91	1.65609e-87	11941	Atp2b2
GO:0006810	transport	4.47815	4.49779e-91	1.65609e-87	59049	Slc22a17
GO:0006810	transport	4.47815	4.49779e-91	1.65609e-87	20514	Slc1a5
GO:0006810	transport	4.47815	4.49779e-91	1.65609e-87	20897	Stra6
GO:0006810	transport	4.47815	4.49779e-91	1.65609e-87	232975	Atp1a3
GO:0006810	transport	4.47815	4.49779e-91	1.65609e-87	216810	Tom1l2
GO:0006810	transport	4.47815	4.49779e-91	1.65609e-87	243616	Slc6a11
GO:0006810	transport	4.47815	4.49779e-91	1.65609e-87	20527	Slc2a3
GO:0006810	transport	4.47815	4.49779e-91	1.65609e-87	16819	Lcn2
GO:0006810	transport	4.47815	4.49779e-91	1.65609e-87	14810	Grin1
GO:0006810	transport	4.47815	4.49779e-91	1.65609e-87	11775	Ap3b2
GO:0006810	transport	4.47815	4.49779e-91	1.65609e-87	80906	Kcnip2
GO:0006810	transport	4.47815	4.49779e-91	1.65609e-87	66733	Kcng4
GO:0006810	transport	4.47815	4.49779e-91	1.65609e-87	20911	Stxbp2
GO:0006810	transport	4.47815	4.49779e-91	1.65609e-87	19894	Rph3a
GO:0006810	transport	4.47815	4.49779e-91	1.65609e-87	20536	Slc4a3
GO:0006810	transport	4.47815	4.49779e-91	1.65609e-87	233280	Nipa1
GO:0006810	transport	4.47815	4.49779e-91	1.65609e-87	16518	Kcnj2
GO:0006810	transport	4.47815	4.49779e-91	1.65609e-87	14664	Slc6a9
GO:0006810	transport	4.47815	4.49779e-91	1.65609e-87	57780	Fxyd7
GO:0006810	transport	4.47815	4.49779e-91	1.65609e-87	13426	Dync1i1
GO:0006810	transport	4.47815	4.49779e-91	1.65609e-87	20540	Slc7a7
GO:0006810	transport	4.47815	4.49779e-91	1.65609e-87	57816	Tesc
GO:0006810	transport	4.47815	4.49779e-91	1.65609e-87	60510	Syt9
GO:0006810	transport	4.47815	4.49779e-91	1.65609e-87	72265	Tram1
GO:0006810	transport	4.47815	4.49779e-91	1.65609e-87	16835	Ldlr
GO:0006810	transport	4.47815	4.49779e-91	1.65609e-87	56543	Kcnd3
GO:0006810	transport	4.47815	4.49779e-91	1.65609e-87	11305	Abca2
GO:0006810	transport	4.47815	4.49779e-91	1.65609e-87	18830	Pltp
GO:0006810	transport	4.47815	4.49779e-91	1.65609e-87	217262	Abca9
GO:0006810	transport	4.47815	4.49779e-91	1.65609e-87	20541	Slc8a1
GO:0006810	transport	4.47815	4.49779e-91	1.65609e-87	11307	Abcg1
GO:0006810	transport	4.47815	4.49779e-91	1.65609e-87	214112	Nipal4
GO:0006810	transport	4.47815	4.49779e-91	1.65609e-87	237542	Osbpl8
GO:0006810	transport	4.47815	4.49779e-91	1.65609e-87	19339	Rab3a
GO:0006810	transport	4.47815	4.49779e-91	1.65609e-87	233979	Tpcn2
GO:0006810	transport	4.47815	4.49779e-91	1.65609e-87	170459	Stard4
GO:0006810	transport	4.47815	4.49779e-91	1.65609e-87	54418	Fmn2
GO:0006810	transport	4.47815	4.49779e-91	1.65609e-87	67473	Slc47a1
GO:0006810	transport	4.47815	4.49779e-91	1.65609e-87	11977	Atp7a
GO:0006810	transport	4.47815	4.49779e-91	1.65609e-87	74760	Rab3il1
GO:0006810	transport	4.47815	4.49779e-91	1.65609e-87	399548	Scn4b
GO:0006810	transport	4.47815	4.49779e-91	1.65609e-87	18173	Slc11a1
GO:0006810	transport	4.47815	4.49779e-91	1.65609e-87	67790	Rab39b
GO:0006810	transport	4.47815	4.49779e-91	1.65609e-87	12300	Cacng2
GO:0006810	transport	4.47815	4.49779e-91	1.65609e-87	68666	Svop
GO:0006810	transport	4.47815	4.49779e-91	1.65609e-87	70357	Kcnip1
GO:0006810	transport	4.47815	4.49779e-91	1.65609e-87	13132	Dab2
GO:0006810	transport	4.47815	4.49779e-91	1.65609e-87	140723	Cacng5
GO:0006810	transport	4.47815	4.49779e-91	1.65609e-87	235281	Scn3b
GO:0006810	transport	4.47815	4.49779e-91	1.65609e-87	58222	Rab37
GO:0006810	transport	4.47815	4.49779e-91	1.65609e-87	170738	Kcnh7
GO:0006810	transport	4.47815	4.49779e-91	1.65609e-87	70361	Lman1
GO:0006810	transport	4.47815	4.49779e-91	1.65609e-87	13057	Cyba
GO:0006810	transport	4.47815	4.49779e-91	1.65609e-87	104245	Slc6a5
GO:0006810	transport	4.47815	4.49779e-91	1.65609e-87	103098	Slc6a15
GO:0006810	transport	4.47815	4.49779e-91	1.65609e-87	406218	Panx2
GO:0006810	transport	4.47815	4.49779e-91	1.65609e-87	242341	Atp6v0d2
GO:0006810	transport	4.47815	4.49779e-91	1.65609e-87	63993	Slc5a7
GO:0006810	transport	4.47815	4.49779e-91	1.65609e-87	227731	Slc25a25
GO:0006810	transport	4.47815	4.49779e-91	1.65609e-87	14811	Grin2a
GO:0006810	transport	4.47815	4.49779e-91	1.65609e-87	69178	Snx5
GO:0006810	transport	4.47815	4.49779e-91	1.65609e-87	214601	Slc10a3
GO:0006810	transport	4.47815	4.49779e-91	1.65609e-87	20499	Slc12a7
GO:0006810	transport	4.47815	4.49779e-91	1.65609e-87	16519	Kcnj3
GO:0006810	transport	4.47815	4.49779e-91	1.65609e-87	317750	Slc24a5
GO:0006810	transport	4.47815	4.49779e-91	1.65609e-87	18440	P2rx6
GO:0006810	transport	4.47815	4.49779e-91	1.65609e-87	234857	Spire2
GO:0006810	transport	4.47815	4.49779e-91	1.65609e-87	70484	Slc35d2
GO:0006810	transport	4.47815	4.49779e-91	1.65609e-87	103511	Fam26e
GO:0006810	transport	4.47815	4.49779e-91	1.65609e-87	105722	Ano6
GO:0006810	transport	4.47815	4.49779e-91	1.65609e-87	225861	Snx32
GO:0006810	transport	4.47815	4.49779e-91	1.65609e-87	16525	Kcnk1
GO:0006810	transport	4.47815	4.49779e-91	1.65609e-87	74096	Hvcn1
GO:0006810	transport	4.47815	4.49779e-91	1.65609e-87	70556	Slc25a33
GO:0006810	transport	4.47815	4.49779e-91	1.65609e-87	50934	Slc7a8
GO:0006810	transport	4.47815	4.49779e-91	1.65609e-87	99031	Osbpl6
GO:0006810	transport	4.47815	4.49779e-91	1.65609e-87	72821	Scn2b
GO:0006810	transport	4.47815	4.49779e-91	1.65609e-87	54525	Syt7
GO:0006810	transport	4.47815	4.49779e-91	1.65609e-87	14802	Gria4
GO:0006810	transport	4.47815	4.49779e-91	1.65609e-87	66859	Slc16a9
GO:0006810	transport	4.47815	4.49779e-91	1.65609e-87	56807	Scamp5
GO:0006810	transport	4.47815	4.49779e-91	1.65609e-87	338370	Nalcn
GO:0006810	transport	4.47815	4.49779e-91	1.65609e-87	14658	Glrb
GO:0006810	transport	4.47815	4.49779e-91	1.65609e-87	66868	Mfsd1
GO:0006810	transport	4.47815	4.49779e-91	1.65609e-87	235180	Fez1
GO:0006810	transport	4.47815	4.49779e-91	1.65609e-87	99738	Kcnc4
GO:0006810	transport	4.47815	4.49779e-91	1.65609e-87	208691	Eif5a2
GO:0006810	transport	4.47815	4.49779e-91	1.65609e-87	20265	Scn1a
GO:0006810	transport	4.47815	4.49779e-91	1.65609e-87	210027	Slc35f3
GO:0006810	transport	4.47815	4.49779e-91	1.65609e-87	67815	Sec14l2
GO:0006810	transport	4.47815	4.49779e-91	1.65609e-87	76408	Abcc3
GO:0006810	transport	4.47815	4.49779e-91	1.65609e-87	240614	Ranbp6
GO:0006810	transport	4.47815	4.49779e-91	1.65609e-87	12296	Cacnb2
GO:0006810	transport	4.47815	4.49779e-91	1.65609e-87	67602	Necap1
GO:0006810	transport	4.47815	4.49779e-91	1.65609e-87	240638	Slc16a12
GO:0006810	transport	4.47815	4.49779e-91	1.65609e-87	12287	Cacna1b
GO:0006810	transport	4.47815	4.49779e-91	1.65609e-87	72168	Aifm3
GO:0006810	transport	4.47815	4.49779e-91	1.65609e-87	22166	Txn1
GO:0006810	transport	4.47815	4.49779e-91	1.65609e-87	66237	Atp6v1g2
GO:0006810	transport	4.47815	4.49779e-91	1.65609e-87	14654	Glra1
GO:0006810	transport	4.47815	4.49779e-91	1.65609e-87	20272	Scn7a
GO:0006810	transport	4.47815	4.49779e-91	1.65609e-87	338521	Fa2h
GO:0006810	transport	4.47815	4.49779e-91	1.65609e-87	11444	Chrnb2
GO:0006810	transport	4.47815	4.49779e-91	1.65609e-87	242662	Rims3
GO:0006810	transport	4.47815	4.49779e-91	1.65609e-87	226421	5430435G22Rik
GO:0006810	transport	4.47815	4.49779e-91	1.65609e-87	20273	Scn8a
GO:0006810	transport	4.47815	4.49779e-91	1.65609e-87	11441	Chrna7
GO:0006810	transport	4.47815	4.49779e-91	1.65609e-87	57138	Slc12a5
GO:0006810	transport	4.47815	4.49779e-91	1.65609e-87	226422	Rab7l1
GO:0006810	transport	4.47815	4.49779e-91	1.65609e-87	16511	Kcnh2
GO:0006810	transport	4.47815	4.49779e-91	1.65609e-87	67028	2610002M06Rik
GO:0006810	transport	4.47815	4.49779e-91	1.65609e-87	242773	Slc45a1
GO:0006810	transport	4.47815	4.49779e-91	1.65609e-87	26946	Trpc7
GO:0006810	transport	4.47815	4.49779e-91	1.65609e-87	12290	Cacna1e
GO:0006810	transport	4.47815	4.49779e-91	1.65609e-87	231290	Slc10a4
GO:0006810	transport	4.47815	4.49779e-91	1.65609e-87	20977	Syp
GO:0006810	transport	4.47815	4.49779e-91	1.65609e-87	18195	Nsf
GO:0006810	transport	4.47815	4.49779e-91	1.65609e-87	105785	Kdelr3
GO:0006810	transport	4.47815	4.49779e-91	1.65609e-87	235442	Rab8b
GO:0006810	transport	4.47815	4.49779e-91	1.65609e-87	74438	Clvs1
GO:0006810	transport	4.47815	4.49779e-91	1.65609e-87	56216	Stx1b
GO:0006810	transport	4.47815	4.49779e-91	1.65609e-87	207227	Stxbp5l
GO:0006810	transport	4.47815	4.49779e-91	1.65609e-87	14396	Gabra3
GO:0006810	transport	4.47815	4.49779e-91	1.65609e-87	20981	Syt3
GO:0006810	transport	4.47815	4.49779e-91	1.65609e-87	20980	Syt2
GO:0006810	transport	4.47815	4.49779e-91	1.65609e-87	270192	Rab6b
GO:0006810	transport	4.47815	4.49779e-91	1.65609e-87	116837	Rims1
GO:0006810	transport	4.47815	4.49779e-91	1.65609e-87	236727	Slc9a7
GO:0006810	transport	4.47815	4.49779e-91	1.65609e-87	64051	Sv2a
GO:0006810	transport	4.47815	4.49779e-91	1.65609e-87	16504	Kcnc3
GO:0006810	transport	4.47815	4.49779e-91	1.65609e-87	24059	Slco2a1
GO:0006810	transport	4.47815	4.49779e-91	1.65609e-87	18438	P2rx4
GO:0006810	transport	4.47815	4.49779e-91	1.65609e-87	26372	Clcn6
GO:0006810	transport	4.47815	4.49779e-91	1.65609e-87	16792	Laptm5
GO:0006810	transport	4.47815	4.49779e-91	1.65609e-87	16517	Kcnj16
GO:0006810	transport	4.47815	4.49779e-91	1.65609e-87	108123	Napg
GO:0006810	transport	4.47815	4.49779e-91	1.65609e-87	14799	Gria1
GO:0006810	transport	4.47815	4.49779e-91	1.65609e-87	17913	Myo1c
GO:0006810	transport	4.47815	4.49779e-91	1.65609e-87	11784	Apba2
GO:0006810	transport	4.47815	4.49779e-91	1.65609e-87	16510	Kcnh1
GO:0006810	transport	4.47815	4.49779e-91	1.65609e-87	12121	Bicd1
GO:0006810	transport	4.47815	4.49779e-91	1.65609e-87	12298	Cacnb4
GO:0006810	transport	4.47815	4.49779e-91	1.65609e-87	56857	Slc37a2
GO:0006810	transport	4.47815	4.49779e-91	1.65609e-87	69908	Rab3b
GO:0006810	transport	4.47815	4.49779e-91	1.65609e-87	21354	Tap1
GO:0006810	transport	4.47815	4.49779e-91	1.65609e-87	19326	Rab11b
GO:0006810	transport	4.47815	4.49779e-91	1.65609e-87	238271	Kcnh5
GO:0006810	transport	4.47815	4.49779e-91	1.65609e-87	237213	Glra2
GO:0006810	transport	4.47815	4.49779e-91	1.65609e-87	68428	Steap3
GO:0006810	transport	4.47815	4.49779e-91	1.65609e-87	14800	Gria2
GO:0006810	transport	4.47815	4.49779e-91	1.65609e-87	67295	Rab3c
GO:0006810	transport	4.47815	4.49779e-91	1.65609e-87	14394	Gabra1
GO:0006810	transport	4.47815	4.49779e-91	1.65609e-87	229706	Slc6a17
GO:0006810	transport	4.47815	4.49779e-91	1.65609e-87	53945	Slc40a1
GO:0006810	transport	4.47815	4.49779e-91	1.65609e-87	320150	Zdhhc17
GO:0006810	transport	4.47815	4.49779e-91	1.65609e-87	16498	Kcnab2
GO:0006810	transport	4.47815	4.49779e-91	1.65609e-87	20910	Stxbp1
GO:0006810	transport	4.47815	4.49779e-91	1.65609e-87	14395	Gabra2
GO:0006810	transport	4.47815	4.49779e-91	1.65609e-87	21452	Tcn2
GO:0006810	transport	4.47815	4.49779e-91	1.65609e-87	15166	Hcn2
GO:0006810	transport	4.47815	4.49779e-91	1.65609e-87	78830	Slc25a12
GO:0006810	transport	4.47815	4.49779e-91	1.65609e-87	230751	Oscp1
GO:0006810	transport	4.47815	4.49779e-91	1.65609e-87	116838	Rims2
GO:0006810	transport	4.47815	4.49779e-91	1.65609e-87	11438	Chrna4
GO:0006810	transport	4.47815	4.49779e-91	1.65609e-87	11989	Slc7a3
GO:0006810	transport	4.47815	4.49779e-91	1.65609e-87	53623	Gria3
GO:0006810	transport	4.47815	4.49779e-91	1.65609e-87	20321	Frrs1
GO:0006810	transport	4.47815	4.49779e-91	1.65609e-87	14401	Gabrb2
GO:0006810	transport	4.47815	4.49779e-91	1.65609e-87	26357	Abcg2
GO:0006810	transport	4.47815	4.49779e-91	1.65609e-87	18739	Pitpnm1
GO:0006810	transport	4.47815	4.49779e-91	1.65609e-87	108116	Slco3a1
GO:0006810	transport	4.47815	4.49779e-91	1.65609e-87	16485	Kcna1
GO:0006810	transport	4.47815	4.49779e-91	1.65609e-87	215890	Clvs2
GO:0006810	transport	4.47815	4.49779e-91	1.65609e-87	68279	Mcoln2
GO:0006810	transport	4.47815	4.49779e-91	1.65609e-87	74011	Slc25a27
GO:0006810	transport	4.47815	4.49779e-91	1.65609e-87	72661	Serp2
GO:0006810	transport	4.47815	4.49779e-91	1.65609e-87	20660	Sorl1
GO:0006810	transport	4.47815	4.49779e-91	1.65609e-87	319924	Apba1
GO:0006810	transport	4.47815	4.49779e-91	1.65609e-87	53896	Slc7a10
GO:0006810	transport	4.47815	4.49779e-91	1.65609e-87	14406	Gabrg2
GO:0006810	transport	4.47815	4.49779e-91	1.65609e-87	11931	Atp1b1
GO:0006810	transport	4.47815	4.49779e-91	1.65609e-87	18301	Fxyd5
GO:0006810	transport	4.47815	4.49779e-91	1.65609e-87	70676	Gulp1
GO:0006810	transport	4.47815	4.49779e-91	1.65609e-87	232333	Slc6a1
GO:0006810	transport	4.47815	4.49779e-91	1.65609e-87	53420	Syt5
GO:0006810	transport	4.47815	4.49779e-91	1.65609e-87	11812	Apoc1
GO:0006810	transport	4.47815	4.49779e-91	1.65609e-87	14806	Grik2
GO:0006810	transport	4.47815	4.49779e-91	1.65609e-87	22063	Trpc1
GO:0006810	transport	4.47815	4.49779e-91	1.65609e-87	110862	Kcnq3
GO:0006810	transport	4.47815	4.49779e-91	1.65609e-87	15165	Hcn1
GO:0006810	transport	4.47815	4.49779e-91	1.65609e-87	50907	Preb
GO:0006810	transport	4.47815	4.49779e-91	1.65609e-87	140919	Slc17a6
GO:0006810	transport	4.47815	4.49779e-91	1.65609e-87	27062	Cadps
GO:0006810	transport	4.47815	4.49779e-91	1.65609e-87	76252	Atp6v0e2
GO:0006810	transport	4.47815	4.49779e-91	1.65609e-87	83674	Cnnm1
GO:0006810	transport	4.47815	4.49779e-91	1.65609e-87	12889	Cplx1
GO:0006810	transport	4.47815	4.49779e-91	1.65609e-87	22067	Trpc5
GO:0006810	transport	4.47815	4.49779e-91	1.65609e-87	14805	Grik1
GO:0006810	transport	4.47815	4.49779e-91	1.65609e-87	16528	Kcnk4
GO:0006810	transport	4.47815	4.49779e-91	1.65609e-87	66111	Tmed3
GO:0006810	transport	4.47815	4.49779e-91	1.65609e-87	16499	Kcnab3
GO:0006810	transport	4.47815	4.49779e-91	1.65609e-87	229801	Tram1l1
GO:0006810	transport	4.47815	4.49779e-91	1.65609e-87	241919	Slc7a14
GO:0006810	transport	4.47815	4.49779e-91	1.65609e-87	64176	Sv2b
GO:0006810	transport	4.47815	4.49779e-91	1.65609e-87	229731	Slc25a24
GO:0006810	transport	4.47815	4.49779e-91	1.65609e-87	22342	Lin7b
GO:0006810	transport	4.47815	4.49779e-91	1.65609e-87	22348	Slc32a1
GO:0006810	transport	4.47815	4.49779e-91	1.65609e-87	56358	Copz2
GO:0006810	transport	4.47815	4.49779e-91	1.65609e-87	13056	Cyb561
GO:0006810	transport	4.47815	4.49779e-91	1.65609e-87	110886	Gabra5
GO:0006810	transport	4.47815	4.49779e-91	1.65609e-87	13521	Slc26a2
GO:0006810	transport	4.47815	4.49779e-91	1.65609e-87	56018	Stard10
GO:0006810	transport	4.47815	4.49779e-91	1.65609e-87	56808	Cacna2d2
GO:0006810	transport	4.47815	4.49779e-91	1.65609e-87	14812	Grin2b
GO:0006810	transport	4.47815	4.49779e-91	1.65609e-87	12890	Cplx2
GO:0006810	transport	4.47815	4.49779e-91	1.65609e-87	16492	Kcna4
GO:0006810	transport	4.47815	4.49779e-91	1.65609e-87	110304	Glra3
GO:0006810	transport	4.47815	4.49779e-91	1.65609e-87	30791	Slc39a1
GO:0006810	transport	4.47815	4.49779e-91	1.65609e-87	213053	Slc39a14
GO:0006810	transport	4.47815	4.49779e-91	1.65609e-87	16502	Kcnc1
GO:0006810	transport	4.47815	4.49779e-91	1.65609e-87	16490	Kcna2
GO:0006810	transport	4.47815	4.49779e-91	1.65609e-87	94045	P2rx5
GO:0006810	transport	4.47815	4.49779e-91	1.65609e-87	16531	Kcnma1
GO:0006810	transport	4.47815	4.49779e-91	1.65609e-87	14803	Grid1
GO:0006810	transport	4.47815	4.49779e-91	1.65609e-87	319642	Rab9b
GO:0006810	transport	4.47815	4.49779e-91	1.65609e-87	22228	Ucp2
GO:0006810	transport	4.47815	4.49779e-91	1.65609e-87	20191	Ryr2
GO:0006810	transport	4.47815	4.49779e-91	1.65609e-87	22359	Vldlr
GO:0006810	transport	4.47815	4.49779e-91	1.65609e-87	16536	Kcnq2
GO:0006810	transport	4.47815	4.49779e-91	1.65609e-87	208890	Slc26a7
GO:0006810	transport	4.47815	4.49779e-91	1.65609e-87	16524	Kcnj9
GO:0006810	transport	4.47815	4.49779e-91	1.65609e-87	76561	Snx7
GO:0006810	transport	4.47815	4.49779e-91	1.65609e-87	59033	Slc4a8
GO:0006810	transport	4.47815	4.49779e-91	1.65609e-87	56325	Abcb9
GO:0006810	transport	4.47815	4.49779e-91	1.65609e-87	29819	Stau2
GO:0006810	transport	4.47815	4.49779e-91	1.65609e-87	30959	Ddx25
GO:0006810	transport	4.47815	4.49779e-91	1.65609e-87	18764	Pkd2
GO:0006810	transport	4.47815	4.49779e-91	1.65609e-87	20510	Slc1a1
GO:0006810	transport	4.47815	4.49779e-91	1.65609e-87	16803	Lbp
GO:0006810	transport	4.47815	4.49779e-91	1.65609e-87	16514	Kcnj11
GO:0006810	transport	4.47815	4.49779e-91	1.65609e-87	22784	Slc30a3
GO:0006810	transport	4.47815	4.49779e-91	1.65609e-87	14407	Gabrg3
GO:0006810	transport	4.47815	4.49779e-91	1.65609e-87	65221	Slc15a3
GO:0006810	transport	4.47815	4.49779e-91	1.65609e-87	16467	Atcay
GO:0006810	transport	4.47815	4.49779e-91	1.65609e-87	56461	Kcnip3
GO:0006810	transport	4.47815	4.49779e-91	1.65609e-87	13058	Cybb
GO:0006810	transport	4.47815	4.49779e-91	1.65609e-87	114584	Clic1
GO:0007155	cell adhesion	7.21205	2.15592e-65	3.96904e-62	58235	Pvrl1
GO:0007155	cell adhesion	7.21205	2.15592e-65	3.96904e-62	18081	Ninj1
GO:0007155	cell adhesion	7.21205	2.15592e-65	3.96904e-62	16773	Lama2
GO:0007155	cell adhesion	7.21205	2.15592e-65	3.96904e-62	16412	Itgb1
GO:0007155	cell adhesion	7.21205	2.15592e-65	3.96904e-62	56191	Tro
GO:0007155	cell adhesion	7.21205	2.15592e-65	3.96904e-62	15891	Ibsp
GO:0007155	cell adhesion	7.21205	2.15592e-65	3.96904e-62	11803	Aplp1
GO:0007155	cell adhesion	7.21205	2.15592e-65	3.96904e-62	12489	Cd33
GO:0007155	cell adhesion	7.21205	2.15592e-65	3.96904e-62	19039	Lgals3bp
GO:0007155	cell adhesion	7.21205	2.15592e-65	3.96904e-62	17064	Cd93
GO:0007155	cell adhesion	7.21205	2.15592e-65	3.96904e-62	64099	Parvg
GO:0007155	cell adhesion	7.21205	2.15592e-65	3.96904e-62	226519	Lamc1
GO:0007155	cell adhesion	7.21205	2.15592e-65	3.96904e-62	21825	Thbs1
GO:0007155	cell adhesion	7.21205	2.15592e-65	3.96904e-62	22330	Vcl
GO:0007155	cell adhesion	7.21205	2.15592e-65	3.96904e-62	14012	Mpzl2
GO:0007155	cell adhesion	7.21205	2.15592e-65	3.96904e-62	53870	Cntn6
GO:0007155	cell adhesion	7.21205	2.15592e-65	3.96904e-62	12831	Col5a1
GO:0007155	cell adhesion	7.21205	2.15592e-65	3.96904e-62	12483	Cd22
GO:0007155	cell adhesion	7.21205	2.15592e-65	3.96904e-62	270190	Ephb1
GO:0007155	cell adhesion	7.21205	2.15592e-65	3.96904e-62	16419	Itgb5
GO:0007155	cell adhesion	7.21205	2.15592e-65	3.96904e-62	192187	Stab1
GO:0007155	cell adhesion	7.21205	2.15592e-65	3.96904e-62	12032	Bcan
GO:0007155	cell adhesion	7.21205	2.15592e-65	3.96904e-62	50706	Postn
GO:0007155	cell adhesion	7.21205	2.15592e-65	3.96904e-62	320873	Cdh10
GO:0007155	cell adhesion	7.21205	2.15592e-65	3.96904e-62	12837	Col8a1
GO:0007155	cell adhesion	7.21205	2.15592e-65	3.96904e-62	93886	Pcdhb15
GO:0007155	cell adhesion	7.21205	2.15592e-65	3.96904e-62	16411	Itgax
GO:0007155	cell adhesion	7.21205	2.15592e-65	3.96904e-62	13051	Cx3cr1
GO:0007155	cell adhesion	7.21205	2.15592e-65	3.96904e-62	18187	Nrp2
GO:0007155	cell adhesion	7.21205	2.15592e-65	3.96904e-62	21894	Tln1
GO:0007155	cell adhesion	7.21205	2.15592e-65	3.96904e-62	65945	Clstn1
GO:0007155	cell adhesion	7.21205	2.15592e-65	3.96904e-62	21810	Tgfbi
GO:0007155	cell adhesion	7.21205	2.15592e-65	3.96904e-62	229715	Amigo1
GO:0007155	cell adhesion	7.21205	2.15592e-65	3.96904e-62	21826	Thbs2
GO:0007155	cell adhesion	7.21205	2.15592e-65	3.96904e-62	21367	Cntn2
GO:0007155	cell adhesion	7.21205	2.15592e-65	3.96904e-62	16007	Cyr61
GO:0007155	cell adhesion	7.21205	2.15592e-65	3.96904e-62	11931	Atp1b1
GO:0007155	cell adhesion	7.21205	2.15592e-65	3.96904e-62	12816	Col12a1
GO:0007155	cell adhesion	7.21205	2.15592e-65	3.96904e-62	17441	Mog
GO:0007155	cell adhesion	7.21205	2.15592e-65	3.96904e-62	64058	Perp
GO:0007155	cell adhesion	7.21205	2.15592e-65	3.96904e-62	64085	Clstn2
GO:0007155	cell adhesion	7.21205	2.15592e-65	3.96904e-62	27047	Omd
GO:0007155	cell adhesion	7.21205	2.15592e-65	3.96904e-62	74202	Fblim1
GO:0007155	cell adhesion	7.21205	2.15592e-65	3.96904e-62	12822	Col18a1
GO:0007155	cell adhesion	7.21205	2.15592e-65	3.96904e-62	16777	Lamb1
GO:0007155	cell adhesion	7.21205	2.15592e-65	3.96904e-62	12523	Cd84
GO:0007155	cell adhesion	7.21205	2.15592e-65	3.96904e-62	23792	Adam23
GO:0007155	cell adhesion	7.21205	2.15592e-65	3.96904e-62	13508	Dscam
GO:0007155	cell adhesion	7.21205	2.15592e-65	3.96904e-62	16409	Itgam
GO:0007155	cell adhesion	7.21205	2.15592e-65	3.96904e-62	14595	B4galt1
GO:0007155	cell adhesion	7.21205	2.15592e-65	3.96904e-62	15442	Hpse
GO:0007155	cell adhesion	7.21205	2.15592e-65	3.96904e-62	12833	Col6a1
GO:0007155	cell adhesion	7.21205	2.15592e-65	3.96904e-62	16775	Lama4
GO:0007155	cell adhesion	7.21205	2.15592e-65	3.96904e-62	269784	Cntn4
GO:0007155	cell adhesion	7.21205	2.15592e-65	3.96904e-62	21923	Tnc
GO:0007155	cell adhesion	7.21205	2.15592e-65	3.96904e-62	18074	Nid2
GO:0007155	cell adhesion	7.21205	2.15592e-65	3.96904e-62	56429	Dpt
GO:0007155	cell adhesion	7.21205	2.15592e-65	3.96904e-62	107321	Lpxn
GO:0007155	cell adhesion	7.21205	2.15592e-65	3.96904e-62	29817	Igfbp7
GO:0007155	cell adhesion	7.21205	2.15592e-65	3.96904e-62	64817	Svep1
GO:0007155	cell adhesion	7.21205	2.15592e-65	3.96904e-62	17968	Ncam2
GO:0007155	cell adhesion	7.21205	2.15592e-65	3.96904e-62	17886	Myh9
GO:0007155	cell adhesion	7.21205	2.15592e-65	3.96904e-62	93874	Pcdhb3
GO:0007155	cell adhesion	7.21205	2.15592e-65	3.96904e-62	18214	Ddr2
GO:0007155	cell adhesion	7.21205	2.15592e-65	3.96904e-62	13482	Dpp4
GO:0007155	cell adhesion	7.21205	2.15592e-65	3.96904e-62	108101	Fermt3
GO:0007155	cell adhesion	7.21205	2.15592e-65	3.96904e-62	14268	Fn1
GO:0007155	cell adhesion	7.21205	2.15592e-65	3.96904e-62	11486	Ada
GO:0007155	cell adhesion	7.21205	2.15592e-65	3.96904e-62	329941	Col8a2
GO:0007155	cell adhesion	7.21205	2.15592e-65	3.96904e-62	12986	Csf3r
GO:0007155	cell adhesion	7.21205	2.15592e-65	3.96904e-62	330790	Hapln4
GO:0007155	cell adhesion	7.21205	2.15592e-65	3.96904e-62	245537	Nlgn3
GO:0007155	cell adhesion	7.21205	2.15592e-65	3.96904e-62	26364	Cd97
GO:0007155	cell adhesion	7.21205	2.15592e-65	3.96904e-62	18186	Nrp1
GO:0007155	cell adhesion	7.21205	2.15592e-65	3.96904e-62	219228	Pcdh17
GO:0007155	cell adhesion	7.21205	2.15592e-65	3.96904e-62	76884	Cyfip2
GO:0007155	cell adhesion	7.21205	2.15592e-65	3.96904e-62	11568	Aebp1
GO:0007155	cell adhesion	7.21205	2.15592e-65	3.96904e-62	18488	Cntn3
GO:0007155	cell adhesion	7.21205	2.15592e-65	3.96904e-62	233186	Siglec5
GO:0007155	cell adhesion	7.21205	2.15592e-65	3.96904e-62	73940	Hapln2
GO:0007155	cell adhesion	7.21205	2.15592e-65	3.96904e-62	16414	Itgb2
GO:0007155	cell adhesion	7.21205	2.15592e-65	3.96904e-62	11754	Aoc3
GO:0007155	cell adhesion	7.21205	2.15592e-65	3.96904e-62	20312	Cx3cl1
GO:0007155	cell adhesion	7.21205	2.15592e-65	3.96904e-62	94332	Cadm3
GO:0007155	cell adhesion	7.21205	2.15592e-65	3.96904e-62	232370	Clstn3
GO:0007155	cell adhesion	7.21205	2.15592e-65	3.96904e-62	12834	Col6a2
GO:0007155	cell adhesion	7.21205	2.15592e-65	3.96904e-62	319655	Podxl2
GO:0007155	cell adhesion	7.21205	2.15592e-65	3.96904e-62	93879	Pcdhb8
GO:0007155	cell adhesion	7.21205	2.15592e-65	3.96904e-62	76293	Mfap4
GO:0007155	cell adhesion	7.21205	2.15592e-65	3.96904e-62	93695	Gpnmb
GO:0007155	cell adhesion	7.21205	2.15592e-65	3.96904e-62	241226	Itga8
GO:0007155	cell adhesion	7.21205	2.15592e-65	3.96904e-62	19229	Ptk2b
GO:0007155	cell adhesion	7.21205	2.15592e-65	3.96904e-62	11423	Ache
GO:0007155	cell adhesion	7.21205	2.15592e-65	3.96904e-62	15894	Icam1
GO:0007155	cell adhesion	7.21205	2.15592e-65	3.96904e-62	100952	Emilin1
GO:0007155	cell adhesion	7.21205	2.15592e-65	3.96904e-62	12564	Cdh8
GO:0007155	cell adhesion	7.21205	2.15592e-65	3.96904e-62	215654	Cdh12
GO:0007155	cell adhesion	7.21205	2.15592e-65	3.96904e-62	56264	Cpxm1
GO:0007155	cell adhesion	7.21205	2.15592e-65	3.96904e-62	22174	Tyro3
GO:0007155	cell adhesion	7.21205	2.15592e-65	3.96904e-62	72927	Hepacam
GO:0007155	cell adhesion	7.21205	2.15592e-65	3.96904e-62	14726	Pdpn
GO:0007155	cell adhesion	7.21205	2.15592e-65	3.96904e-62	12504	Cd4
GO:0007155	cell adhesion	7.21205	2.15592e-65	3.96904e-62	12805	Cntn1
GO:0007155	cell adhesion	7.21205	2.15592e-65	3.96904e-62	16401	Itga4
GO:0007155	cell adhesion	7.21205	2.15592e-65	3.96904e-62	170571	Cntnap4
GO:0007155	cell adhesion	7.21205	2.15592e-65	3.96904e-62	18073	Nid1
GO:0007155	cell adhesion	7.21205	2.15592e-65	3.96904e-62	319480	Itga11
GO:0007155	cell adhesion	7.21205	2.15592e-65	3.96904e-62	241201	Cdh7
GO:0007155	cell adhesion	7.21205	2.15592e-65	3.96904e-62	11489	Adam12
GO:0007155	cell adhesion	7.21205	2.15592e-65	3.96904e-62	20612	Siglec1
GO:0007155	cell adhesion	7.21205	2.15592e-65	3.96904e-62	20750	Spp1
GO:0007155	cell adhesion	7.21205	2.15592e-65	3.96904e-62	23876	Fbln5
GO:0007155	cell adhesion	7.21205	2.15592e-65	3.96904e-62	12819	Col15a1
GO:0007155	cell adhesion	7.21205	2.15592e-65	3.96904e-62	17136	Mag
GO:0007155	cell adhesion	7.21205	2.15592e-65	3.96904e-62	17085	Ly9
GO:0007155	cell adhesion	7.21205	2.15592e-65	3.96904e-62	12505	Cd44
GO:0007155	cell adhesion	7.21205	2.15592e-65	3.96904e-62	12562	Cdh5
GO:0007155	cell adhesion	7.21205	2.15592e-65	3.96904e-62	53321	Cntnap1
GO:0007155	cell adhesion	7.21205	2.15592e-65	3.96904e-62	12818	Col14a1
GO:0006811	ion transport	6.48584	1.85009e-61	2.27067e-58	57780	Fxyd7
GO:0006811	ion transport	6.48584	1.85009e-61	2.27067e-58	108116	Slco3a1
GO:0006811	ion transport	6.48584	1.85009e-61	2.27067e-58	80906	Kcnip2
GO:0006811	ion transport	6.48584	1.85009e-61	2.27067e-58	21452	Tcn2
GO:0006811	ion transport	6.48584	1.85009e-61	2.27067e-58	26372	Clcn6
GO:0006811	ion transport	6.48584	1.85009e-61	2.27067e-58	233280	Nipa1
GO:0006811	ion transport	6.48584	1.85009e-61	2.27067e-58	16504	Kcnc3
GO:0006811	ion transport	6.48584	1.85009e-61	2.27067e-58	11941	Atp2b2
GO:0006811	ion transport	6.48584	1.85009e-61	2.27067e-58	16514	Kcnj11
GO:0006811	ion transport	6.48584	1.85009e-61	2.27067e-58	20272	Scn7a
GO:0006811	ion transport	6.48584	1.85009e-61	2.27067e-58	16499	Kcnab3
GO:0006811	ion transport	6.48584	1.85009e-61	2.27067e-58	317750	Slc24a5
GO:0006811	ion transport	6.48584	1.85009e-61	2.27067e-58	406218	Panx2
GO:0006811	ion transport	6.48584	1.85009e-61	2.27067e-58	15166	Hcn2
GO:0006811	ion transport	6.48584	1.85009e-61	2.27067e-58	11519	Add2
GO:0006811	ion transport	6.48584	1.85009e-61	2.27067e-58	66237	Atp6v1g2
GO:0006811	ion transport	6.48584	1.85009e-61	2.27067e-58	16519	Kcnj3
GO:0006811	ion transport	6.48584	1.85009e-61	2.27067e-58	214112	Nipal4
GO:0006811	ion transport	6.48584	1.85009e-61	2.27067e-58	26946	Trpc7
GO:0006811	ion transport	6.48584	1.85009e-61	2.27067e-58	14406	Gabrg2
GO:0006811	ion transport	6.48584	1.85009e-61	2.27067e-58	14395	Gabra2
GO:0006811	ion transport	6.48584	1.85009e-61	2.27067e-58	16536	Kcnq2
GO:0006811	ion transport	6.48584	1.85009e-61	2.27067e-58	66733	Kcng4
GO:0006811	ion transport	6.48584	1.85009e-61	2.27067e-58	68279	Mcoln2
GO:0006811	ion transport	6.48584	1.85009e-61	2.27067e-58	18438	P2rx4
GO:0006811	ion transport	6.48584	1.85009e-61	2.27067e-58	14407	Gabrg3
GO:0006811	ion transport	6.48584	1.85009e-61	2.27067e-58	59033	Slc4a8
GO:0006811	ion transport	6.48584	1.85009e-61	2.27067e-58	16490	Kcna2
GO:0006811	ion transport	6.48584	1.85009e-61	2.27067e-58	12290	Cacna1e
GO:0006811	ion transport	6.48584	1.85009e-61	2.27067e-58	14810	Grin1
GO:0006811	ion transport	6.48584	1.85009e-61	2.27067e-58	11444	Chrnb2
GO:0006811	ion transport	6.48584	1.85009e-61	2.27067e-58	70357	Kcnip1
GO:0006811	ion transport	6.48584	1.85009e-61	2.27067e-58	233979	Tpcn2
GO:0006811	ion transport	6.48584	1.85009e-61	2.27067e-58	213053	Slc39a14
GO:0006811	ion transport	6.48584	1.85009e-61	2.27067e-58	16517	Kcnj16
GO:0006811	ion transport	6.48584	1.85009e-61	2.27067e-58	20499	Slc12a7
GO:0006811	ion transport	6.48584	1.85009e-61	2.27067e-58	16528	Kcnk4
GO:0006811	ion transport	6.48584	1.85009e-61	2.27067e-58	20265	Scn1a
GO:0006811	ion transport	6.48584	1.85009e-61	2.27067e-58	20536	Slc4a3
GO:0006811	ion transport	6.48584	1.85009e-61	2.27067e-58	57138	Slc12a5
GO:0006811	ion transport	6.48584	1.85009e-61	2.27067e-58	14394	Gabra1
GO:0006811	ion transport	6.48584	1.85009e-61	2.27067e-58	105722	Ano6
GO:0006811	ion transport	6.48584	1.85009e-61	2.27067e-58	16525	Kcnk1
GO:0006811	ion transport	6.48584	1.85009e-61	2.27067e-58	140723	Cacng5
GO:0006811	ion transport	6.48584	1.85009e-61	2.27067e-58	16510	Kcnh1
GO:0006811	ion transport	6.48584	1.85009e-61	2.27067e-58	53623	Gria3
GO:0006811	ion transport	6.48584	1.85009e-61	2.27067e-58	14401	Gabrb2
GO:0006811	ion transport	6.48584	1.85009e-61	2.27067e-58	14812	Grin2b
GO:0006811	ion transport	6.48584	1.85009e-61	2.27067e-58	12296	Cacnb2
GO:0006811	ion transport	6.48584	1.85009e-61	2.27067e-58	170738	Kcnh7
GO:0006811	ion transport	6.48584	1.85009e-61	2.27067e-58	94045	P2rx5
GO:0006811	ion transport	6.48584	1.85009e-61	2.27067e-58	14396	Gabra3
GO:0006811	ion transport	6.48584	1.85009e-61	2.27067e-58	18764	Pkd2
GO:0006811	ion transport	6.48584	1.85009e-61	2.27067e-58	14799	Gria1
GO:0006811	ion transport	6.48584	1.85009e-61	2.27067e-58	242341	Atp6v0d2
GO:0006811	ion transport	6.48584	1.85009e-61	2.27067e-58	208890	Slc26a7
GO:0006811	ion transport	6.48584	1.85009e-61	2.27067e-58	11931	Atp1b1
GO:0006811	ion transport	6.48584	1.85009e-61	2.27067e-58	74096	Hvcn1
GO:0006811	ion transport	6.48584	1.85009e-61	2.27067e-58	14811	Grin2a
GO:0006811	ion transport	6.48584	1.85009e-61	2.27067e-58	16518	Kcnj2
GO:0006811	ion transport	6.48584	1.85009e-61	2.27067e-58	22067	Trpc5
GO:0006811	ion transport	6.48584	1.85009e-61	2.27067e-58	12298	Cacnb4
GO:0006811	ion transport	6.48584	1.85009e-61	2.27067e-58	63993	Slc5a7
GO:0006811	ion transport	6.48584	1.85009e-61	2.27067e-58	110886	Gabra5
GO:0006811	ion transport	6.48584	1.85009e-61	2.27067e-58	56808	Cacna2d2
GO:0006811	ion transport	6.48584	1.85009e-61	2.27067e-58	11977	Atp7a
GO:0006811	ion transport	6.48584	1.85009e-61	2.27067e-58	20541	Slc8a1
GO:0006811	ion transport	6.48584	1.85009e-61	2.27067e-58	110304	Glra3
GO:0006811	ion transport	6.48584	1.85009e-61	2.27067e-58	15165	Hcn1
GO:0006811	ion transport	6.48584	1.85009e-61	2.27067e-58	114584	Clic1
GO:0006811	ion transport	6.48584	1.85009e-61	2.27067e-58	236727	Slc9a7
GO:0006811	ion transport	6.48584	1.85009e-61	2.27067e-58	320150	Zdhhc17
GO:0006811	ion transport	6.48584	1.85009e-61	2.27067e-58	231290	Slc10a4
GO:0006811	ion transport	6.48584	1.85009e-61	2.27067e-58	16531	Kcnma1
GO:0006811	ion transport	6.48584	1.85009e-61	2.27067e-58	16498	Kcnab2
GO:0006811	ion transport	6.48584	1.85009e-61	2.27067e-58	14802	Gria4
GO:0006811	ion transport	6.48584	1.85009e-61	2.27067e-58	72821	Scn2b
GO:0006811	ion transport	6.48584	1.85009e-61	2.27067e-58	14805	Grik1
GO:0006811	ion transport	6.48584	1.85009e-61	2.27067e-58	20191	Ryr2
GO:0006811	ion transport	6.48584	1.85009e-61	2.27067e-58	12257	Tspo
GO:0006811	ion transport	6.48584	1.85009e-61	2.27067e-58	103098	Slc6a15
GO:0006811	ion transport	6.48584	1.85009e-61	2.27067e-58	16492	Kcna4
GO:0006811	ion transport	6.48584	1.85009e-61	2.27067e-58	56543	Kcnd3
GO:0006811	ion transport	6.48584	1.85009e-61	2.27067e-58	14806	Grik2
GO:0006811	ion transport	6.48584	1.85009e-61	2.27067e-58	99738	Kcnc4
GO:0006811	ion transport	6.48584	1.85009e-61	2.27067e-58	59049	Slc22a17
GO:0006811	ion transport	6.48584	1.85009e-61	2.27067e-58	140919	Slc17a6
GO:0006811	ion transport	6.48584	1.85009e-61	2.27067e-58	16819	Lcn2
GO:0006811	ion transport	6.48584	1.85009e-61	2.27067e-58	16485	Kcna1
GO:0006811	ion transport	6.48584	1.85009e-61	2.27067e-58	22063	Trpc1
GO:0006811	ion transport	6.48584	1.85009e-61	2.27067e-58	235281	Scn3b
GO:0006811	ion transport	6.48584	1.85009e-61	2.27067e-58	18439	P2rx7
GO:0006811	ion transport	6.48584	1.85009e-61	2.27067e-58	110862	Kcnq3
GO:0006811	ion transport	6.48584	1.85009e-61	2.27067e-58	14658	Glrb
GO:0006811	ion transport	6.48584	1.85009e-61	2.27067e-58	16511	Kcnh2
GO:0006811	ion transport	6.48584	1.85009e-61	2.27067e-58	12300	Cacng2
GO:0006811	ion transport	6.48584	1.85009e-61	2.27067e-58	16502	Kcnc1
GO:0006811	ion transport	6.48584	1.85009e-61	2.27067e-58	18301	Fxyd5
GO:0006811	ion transport	6.48584	1.85009e-61	2.27067e-58	14654	Glra1
GO:0006811	ion transport	6.48584	1.85009e-61	2.27067e-58	76252	Atp6v0e2
GO:0006811	ion transport	6.48584	1.85009e-61	2.27067e-58	53945	Slc40a1
GO:0006811	ion transport	6.48584	1.85009e-61	2.27067e-58	18440	P2rx6
GO:0006811	ion transport	6.48584	1.85009e-61	2.27067e-58	30791	Slc39a1
GO:0006811	ion transport	6.48584	1.85009e-61	2.27067e-58	18173	Slc11a1
GO:0006811	ion transport	6.48584	1.85009e-61	2.27067e-58	16524	Kcnj9
GO:0006811	ion transport	6.48584	1.85009e-61	2.27067e-58	22784	Slc30a3
GO:0006811	ion transport	6.48584	1.85009e-61	2.27067e-58	56461	Kcnip3
GO:0006811	ion transport	6.48584	1.85009e-61	2.27067e-58	103511	Fam26e
GO:0006811	ion transport	6.48584	1.85009e-61	2.27067e-58	12287	Cacna1b
GO:0006811	ion transport	6.48584	1.85009e-61	2.27067e-58	237213	Glra2
GO:0006811	ion transport	6.48584	1.85009e-61	2.27067e-58	83674	Cnnm1
GO:0006811	ion transport	6.48584	1.85009e-61	2.27067e-58	338370	Nalcn
GO:0006811	ion transport	6.48584	1.85009e-61	2.27067e-58	238271	Kcnh5
GO:0006811	ion transport	6.48584	1.85009e-61	2.27067e-58	20273	Scn8a
GO:0006811	ion transport	6.48584	1.85009e-61	2.27067e-58	399548	Scn4b
GO:0006811	ion transport	6.48584	1.85009e-61	2.27067e-58	11438	Chrna4
GO:0006811	ion transport	6.48584	1.85009e-61	2.27067e-58	68428	Steap3
GO:0006811	ion transport	6.48584	1.85009e-61	2.27067e-58	11441	Chrna7
GO:0006811	ion transport	6.48584	1.85009e-61	2.27067e-58	232975	Atp1a3
GO:0006811	ion transport	6.48584	1.85009e-61	2.27067e-58	13058	Cybb
GO:0006811	ion transport	6.48584	1.85009e-61	2.27067e-58	14803	Grid1
GO:0006811	ion transport	6.48584	1.85009e-61	2.27067e-58	14800	Gria2
GO:0008152	metabolic process	3.8834	1.82921e-38	1.68379e-35	269642	Nat8l
GO:0008152	metabolic process	3.8834	1.82921e-38	1.68379e-35	14104	Fasn
GO:0008152	metabolic process	3.8834	1.82921e-38	1.68379e-35	76238	Grhpr
GO:0008152	metabolic process	3.8834	1.82921e-38	1.68379e-35	22223	Uchl1
GO:0008152	metabolic process	3.8834	1.82921e-38	1.68379e-35	15586	Hyal1
GO:0008152	metabolic process	3.8834	1.82921e-38	1.68379e-35	13033	Ctsd
GO:0008152	metabolic process	3.8834	1.82921e-38	1.68379e-35	210044	Adcy2
GO:0008152	metabolic process	3.8834	1.82921e-38	1.68379e-35	20775	Sqle
GO:0008152	metabolic process	3.8834	1.82921e-38	1.68379e-35	67269	Agtpbp1
GO:0008152	metabolic process	3.8834	1.82921e-38	1.68379e-35	14869	Gstp2
GO:0008152	metabolic process	3.8834	1.82921e-38	1.68379e-35	21391	Tbxas1
GO:0008152	metabolic process	3.8834	1.82921e-38	1.68379e-35	18563	Pcx
GO:0008152	metabolic process	3.8834	1.82921e-38	1.68379e-35	104759	Pld4
GO:0008152	metabolic process	3.8834	1.82921e-38	1.68379e-35	75612	Gns
GO:0008152	metabolic process	3.8834	1.82921e-38	1.68379e-35	52538	Acaa2
GO:0008152	metabolic process	3.8834	1.82921e-38	1.68379e-35	11605	Gla
GO:0008152	metabolic process	3.8834	1.82921e-38	1.68379e-35	15277	Hk2
GO:0008152	metabolic process	3.8834	1.82921e-38	1.68379e-35	12647	Chat
GO:0008152	metabolic process	3.8834	1.82921e-38	1.68379e-35	27053	Asns
GO:0008152	metabolic process	3.8834	1.82921e-38	1.68379e-35	26458	Slc27a2
GO:0008152	metabolic process	3.8834	1.82921e-38	1.68379e-35	21354	Tap1
GO:0008152	metabolic process	3.8834	1.82921e-38	1.68379e-35	14873	Gsto1
GO:0008152	metabolic process	3.8834	1.82921e-38	1.68379e-35	23962	Oasl2
GO:0008152	metabolic process	3.8834	1.82921e-38	1.68379e-35	18479	Pak1
GO:0008152	metabolic process	3.8834	1.82921e-38	1.68379e-35	76898	B3gat1
GO:0008152	metabolic process	3.8834	1.82921e-38	1.68379e-35	17309	Mgat3
GO:0008152	metabolic process	3.8834	1.82921e-38	1.68379e-35	52585	Dhrs1
GO:0008152	metabolic process	3.8834	1.82921e-38	1.68379e-35	22239	Ugt8a
GO:0008152	metabolic process	3.8834	1.82921e-38	1.68379e-35	15446	Hpgd
GO:0008152	metabolic process	3.8834	1.82921e-38	1.68379e-35	18606	Enpp2
GO:0008152	metabolic process	3.8834	1.82921e-38	1.68379e-35	70620	Ube2v2
GO:0008152	metabolic process	3.8834	1.82921e-38	1.68379e-35	14593	Ggps1
GO:0008152	metabolic process	3.8834	1.82921e-38	1.68379e-35	215303	Camk1g
GO:0008152	metabolic process	3.8834	1.82921e-38	1.68379e-35	15211	Hexa
GO:0008152	metabolic process	3.8834	1.82921e-38	1.68379e-35	19264	Ptprc
GO:0008152	metabolic process	3.8834	1.82921e-38	1.68379e-35	74577	Glb1l
GO:0008152	metabolic process	3.8834	1.82921e-38	1.68379e-35	230101	Gba2
GO:0008152	metabolic process	3.8834	1.82921e-38	1.68379e-35	68312	Gstm7
GO:0008152	metabolic process	3.8834	1.82921e-38	1.68379e-35	56421	Pfkp
GO:0008152	metabolic process	3.8834	1.82921e-38	1.68379e-35	13039	Ctsl
GO:0008152	metabolic process	3.8834	1.82921e-38	1.68379e-35	14137	Fdft1
GO:0008152	metabolic process	3.8834	1.82921e-38	1.68379e-35	50917	Galns
GO:0008152	metabolic process	3.8834	1.82921e-38	1.68379e-35	54447	Asah2
GO:0008152	metabolic process	3.8834	1.82921e-38	1.68379e-35	19250	Ptpn14
GO:0008152	metabolic process	3.8834	1.82921e-38	1.68379e-35	17390	Mmp2
GO:0008152	metabolic process	3.8834	1.82921e-38	1.68379e-35	234779	Plcg2
GO:0008152	metabolic process	3.8834	1.82921e-38	1.68379e-35	80898	Erap1
GO:0008152	metabolic process	3.8834	1.82921e-38	1.68379e-35	78894	Aacs
GO:0008152	metabolic process	3.8834	1.82921e-38	1.68379e-35	18548	Pcsk1
GO:0008152	metabolic process	3.8834	1.82921e-38	1.68379e-35	214579	Aldh5a1
GO:0008152	metabolic process	3.8834	1.82921e-38	1.68379e-35	18481	Pak3
GO:0008152	metabolic process	3.8834	1.82921e-38	1.68379e-35	11514	Adcy8
GO:0008152	metabolic process	3.8834	1.82921e-38	1.68379e-35	268566	Gphn
GO:0008152	metabolic process	3.8834	1.82921e-38	1.68379e-35	239559	A4galt
GO:0008152	metabolic process	3.8834	1.82921e-38	1.68379e-35	67689	Aldh3b1
GO:0008152	metabolic process	3.8834	1.82921e-38	1.68379e-35	216739	Acsl6
GO:0008152	metabolic process	3.8834	1.82921e-38	1.68379e-35	19309	Pygm
GO:0008152	metabolic process	3.8834	1.82921e-38	1.68379e-35	99010	Lpcat4
GO:0008152	metabolic process	3.8834	1.82921e-38	1.68379e-35	12182	Bst1
GO:0008152	metabolic process	3.8834	1.82921e-38	1.68379e-35	64580	Ndst4
GO:0008152	metabolic process	3.8834	1.82921e-38	1.68379e-35	52665	Echdc1
GO:0008152	metabolic process	3.8834	1.82921e-38	1.68379e-35	14538	Gcnt2
GO:0008152	metabolic process	3.8834	1.82921e-38	1.68379e-35	102954	Nudt10
GO:0008152	metabolic process	3.8834	1.82921e-38	1.68379e-35	64292	Ptges
GO:0008152	metabolic process	3.8834	1.82921e-38	1.68379e-35	57319	Smpdl3a
GO:0008152	metabolic process	3.8834	1.82921e-38	1.68379e-35	17110	Lyz1
GO:0008152	metabolic process	3.8834	1.82921e-38	1.68379e-35	15360	Hmgcs2
GO:0008152	metabolic process	3.8834	1.82921e-38	1.68379e-35	269437	Plch1
GO:0008152	metabolic process	3.8834	1.82921e-38	1.68379e-35	58223	Mmp19
GO:0008152	metabolic process	3.8834	1.82921e-38	1.68379e-35	83965	Enpp5
GO:0008152	metabolic process	3.8834	1.82921e-38	1.68379e-35	18642	Pfkm
GO:0008152	metabolic process	3.8834	1.82921e-38	1.68379e-35	20451	St8sia3
GO:0008152	metabolic process	3.8834	1.82921e-38	1.68379e-35	13807	Eno2
GO:0008152	metabolic process	3.8834	1.82921e-38	1.68379e-35	16574	Kif5c
GO:0008152	metabolic process	3.8834	1.82921e-38	1.68379e-35	11504	Adamts1
GO:0008152	metabolic process	3.8834	1.82921e-38	1.68379e-35	83768	Dpp7
GO:0008152	metabolic process	3.8834	1.82921e-38	1.68379e-35	72899	Macrod2
GO:0008152	metabolic process	3.8834	1.82921e-38	1.68379e-35	237928	Phospho1
GO:0008152	metabolic process	3.8834	1.82921e-38	1.68379e-35	17160	Man2b2
GO:0008152	metabolic process	3.8834	1.82921e-38	1.68379e-35	23984	Pde10a
GO:0008152	metabolic process	3.8834	1.82921e-38	1.68379e-35	67512	Agpat2
GO:0008152	metabolic process	3.8834	1.82921e-38	1.68379e-35	74205	Acsl3
GO:0008152	metabolic process	3.8834	1.82921e-38	1.68379e-35	14089	Fap
GO:0008152	metabolic process	3.8834	1.82921e-38	1.68379e-35	226409	Zranb3
GO:0008152	metabolic process	3.8834	1.82921e-38	1.68379e-35	12370	Casp8
GO:0008152	metabolic process	3.8834	1.82921e-38	1.68379e-35	241274	Pnpla7
GO:0008152	metabolic process	3.8834	1.82921e-38	1.68379e-35	110006	Gusb
GO:0008152	metabolic process	3.8834	1.82921e-38	1.68379e-35	80890	Trim2
GO:0008152	metabolic process	3.8834	1.82921e-38	1.68379e-35	15212	Hexb
GO:0008152	metabolic process	3.8834	1.82921e-38	1.68379e-35	98711	Rdh10
GO:0008152	metabolic process	3.8834	1.82921e-38	1.68379e-35	26384	Gnpda1
GO:0008152	metabolic process	3.8834	1.82921e-38	1.68379e-35	20440	St6gal1
GO:0008152	metabolic process	3.8834	1.82921e-38	1.68379e-35	56200	Ddx21
GO:0008152	metabolic process	3.8834	1.82921e-38	1.68379e-35	208715	Hmgcs1
GO:0008152	metabolic process	3.8834	1.82921e-38	1.68379e-35	14466	Gba
GO:0008152	metabolic process	3.8834	1.82921e-38	1.68379e-35	16572	Kif5a
GO:0008152	metabolic process	3.8834	1.82921e-38	1.68379e-35	11886	Asah1
GO:0008152	metabolic process	3.8834	1.82921e-38	1.68379e-35	18577	Pde4a
GO:0008152	metabolic process	3.8834	1.82921e-38	1.68379e-35	17855	Mvk
GO:0008152	metabolic process	3.8834	1.82921e-38	1.68379e-35	227671	Gbgt1
GO:0008152	metabolic process	3.8834	1.82921e-38	1.68379e-35	225742	St8sia5
GO:0008152	metabolic process	3.8834	1.82921e-38	1.68379e-35	240518	Peli3
GO:0008152	metabolic process	3.8834	1.82921e-38	1.68379e-35	194237	Rimkla
GO:0008152	metabolic process	3.8834	1.82921e-38	1.68379e-35	17105	Lyz2
GO:0008152	metabolic process	3.8834	1.82921e-38	1.68379e-35	11881	Arsb
GO:0008152	metabolic process	3.8834	1.82921e-38	1.68379e-35	23794	Adamts5
GO:0008152	metabolic process	3.8834	1.82921e-38	1.68379e-35	19378	Aldh1a2
GO:0008152	metabolic process	3.8834	1.82921e-38	1.68379e-35	16790	Anpep
GO:0008152	metabolic process	3.8834	1.82921e-38	1.68379e-35	60525	Acss2
GO:0008152	metabolic process	3.8834	1.82921e-38	1.68379e-35	104112	Acly
GO:0008152	metabolic process	3.8834	1.82921e-38	1.68379e-35	14590	Ggh
GO:0008152	metabolic process	3.8834	1.82921e-38	1.68379e-35	211770	Trib1
GO:0008152	metabolic process	3.8834	1.82921e-38	1.68379e-35	12655	Chi3l3
GO:0008152	metabolic process	3.8834	1.82921e-38	1.68379e-35	17158	Man2a1
GO:0008152	metabolic process	3.8834	1.82921e-38	1.68379e-35	16561	Kif1b
GO:0008152	metabolic process	3.8834	1.82921e-38	1.68379e-35	21817	Tgm2
GO:0008152	metabolic process	3.8834	1.82921e-38	1.68379e-35	17159	Man2b1
GO:0008152	metabolic process	3.8834	1.82921e-38	1.68379e-35	70240	Ufsp1
GO:0008152	metabolic process	3.8834	1.82921e-38	1.68379e-35	74091	Npl
GO:0008152	metabolic process	3.8834	1.82921e-38	1.68379e-35	217262	Abca9
GO:0008152	metabolic process	3.8834	1.82921e-38	1.68379e-35	11992	Auh
GO:0008152	metabolic process	3.8834	1.82921e-38	1.68379e-35	13482	Dpp4
GO:0008152	metabolic process	3.8834	1.82921e-38	1.68379e-35	74008	Arsg
GO:0008152	metabolic process	3.8834	1.82921e-38	1.68379e-35	27419	Naglu
GO:0008152	metabolic process	3.8834	1.82921e-38	1.68379e-35	240725	Sulf1
GO:0008152	metabolic process	3.8834	1.82921e-38	1.68379e-35	66054	Cndp2
GO:0008152	metabolic process	3.8834	1.82921e-38	1.68379e-35	14420	Galc
GO:0045087	innate immune response	8.92247	1.60147e-34	1.17932e-31	17084	Ly86
GO:0045087	innate immune response	8.92247	1.60147e-34	1.17932e-31	12263	C2
GO:0045087	innate immune response	8.92247	1.60147e-34	1.17932e-31	23845	Clec5a
GO:0045087	innate immune response	8.92247	1.60147e-34	1.17932e-31	69769	Tnfaip8l2
GO:0045087	innate immune response	8.92247	1.60147e-34	1.17932e-31	26412	Map4k2
GO:0045087	innate immune response	8.92247	1.60147e-34	1.17932e-31	15944	Irgm1
GO:0045087	innate immune response	8.92247	1.60147e-34	1.17932e-31	71586	Ifih1
GO:0045087	innate immune response	8.92247	1.60147e-34	1.17932e-31	13058	Cybb
GO:0045087	innate immune response	8.92247	1.60147e-34	1.17932e-31	667277	C1rb
GO:0045087	innate immune response	8.92247	1.60147e-34	1.17932e-31	13057	Cyba
GO:0045087	innate immune response	8.92247	1.60147e-34	1.17932e-31	66141	Ifitm3
GO:0045087	innate immune response	8.92247	1.60147e-34	1.17932e-31	266632	Irak4
GO:0045087	innate immune response	8.92247	1.60147e-34	1.17932e-31	237868	Sarm1
GO:0045087	innate immune response	8.92247	1.60147e-34	1.17932e-31	21897	Tlr1
GO:0045087	innate immune response	8.92247	1.60147e-34	1.17932e-31	78781	Zc3hav1
GO:0045087	innate immune response	8.92247	1.60147e-34	1.17932e-31	26362	Axl
GO:0045087	innate immune response	8.92247	1.60147e-34	1.17932e-31	69550	Bst2
GO:0045087	innate immune response	8.92247	1.60147e-34	1.17932e-31	230073	Ddx58
GO:0045087	innate immune response	8.92247	1.60147e-34	1.17932e-31	80287	Apobec3
GO:0045087	innate immune response	8.92247	1.60147e-34	1.17932e-31	12260	C1qb
GO:0045087	innate immune response	8.92247	1.60147e-34	1.17932e-31	24088	Tlr2
GO:0045087	innate immune response	8.92247	1.60147e-34	1.17932e-31	170744	Tlr8
GO:0045087	innate immune response	8.92247	1.60147e-34	1.17932e-31	12946	Cr1l
GO:0045087	innate immune response	8.92247	1.60147e-34	1.17932e-31	72512	Tmem173
GO:0045087	innate immune response	8.92247	1.60147e-34	1.17932e-31	20202	S100a9
GO:0045087	innate immune response	8.92247	1.60147e-34	1.17932e-31	170743	Tlr7
GO:0045087	innate immune response	8.92247	1.60147e-34	1.17932e-31	17079	Cd180
GO:0045087	innate immune response	8.92247	1.60147e-34	1.17932e-31	27056	Irf5
GO:0045087	innate immune response	8.92247	1.60147e-34	1.17932e-31	56045	Samhd1
GO:0045087	innate immune response	8.92247	1.60147e-34	1.17932e-31	279572	Tlr13
GO:0045087	innate immune response	8.92247	1.60147e-34	1.17932e-31	17951	Naip5
GO:0045087	innate immune response	8.92247	1.60147e-34	1.17932e-31	12259	C1qa
GO:0045087	innate immune response	8.92247	1.60147e-34	1.17932e-31	16803	Lbp
GO:0045087	innate immune response	8.92247	1.60147e-34	1.17932e-31	17874	Myd88
GO:0045087	innate immune response	8.92247	1.60147e-34	1.17932e-31	54445	Unc93b1
GO:0045087	innate immune response	8.92247	1.60147e-34	1.17932e-31	17096	Lyn
GO:0045087	innate immune response	8.92247	1.60147e-34	1.17932e-31	16819	Lcn2
GO:0045087	innate immune response	8.92247	1.60147e-34	1.17932e-31	12978	Csf1r
GO:0045087	innate immune response	8.92247	1.60147e-34	1.17932e-31	17474	Clec4d
GO:0045087	innate immune response	8.92247	1.60147e-34	1.17932e-31	66824	Pycard
GO:0045087	innate immune response	8.92247	1.60147e-34	1.17932e-31	17948	Naip2
GO:0045087	innate immune response	8.92247	1.60147e-34	1.17932e-31	56644	Clec7a
GO:0045087	innate immune response	8.92247	1.60147e-34	1.17932e-31	383619	Aim2
GO:0045087	innate immune response	8.92247	1.60147e-34	1.17932e-31	12475	Cd14
GO:0045087	innate immune response	8.92247	1.60147e-34	1.17932e-31	23962	Oasl2
GO:0045087	innate immune response	8.92247	1.60147e-34	1.17932e-31	16362	Irf1
GO:0045087	innate immune response	8.92247	1.60147e-34	1.17932e-31	12229	Btk
GO:0045087	innate immune response	8.92247	1.60147e-34	1.17932e-31	16854	Lgals3
GO:0045087	innate immune response	8.92247	1.60147e-34	1.17932e-31	14129	Fcgr1
GO:0045087	innate immune response	8.92247	1.60147e-34	1.17932e-31	22031	Traf3
GO:0045087	innate immune response	8.92247	1.60147e-34	1.17932e-31	20201	S100a8
GO:0045087	innate immune response	8.92247	1.60147e-34	1.17932e-31	15957	Ifit1
GO:0045087	innate immune response	8.92247	1.60147e-34	1.17932e-31	20963	Syk
GO:0034765	regulation of ion transmembrane transport	9.76195	2.22871e-33	1.36768e-30	16528	Kcnk4
GO:0034765	regulation of ion transmembrane transport	9.76195	2.22871e-33	1.36768e-30	20272	Scn7a
GO:0034765	regulation of ion transmembrane transport	9.76195	2.22871e-33	1.36768e-30	233979	Tpcn2
GO:0034765	regulation of ion transmembrane transport	9.76195	2.22871e-33	1.36768e-30	72821	Scn2b
GO:0034765	regulation of ion transmembrane transport	9.76195	2.22871e-33	1.36768e-30	110862	Kcnq3
GO:0034765	regulation of ion transmembrane transport	9.76195	2.22871e-33	1.36768e-30	16510	Kcnh1
GO:0034765	regulation of ion transmembrane transport	9.76195	2.22871e-33	1.36768e-30	74096	Hvcn1
GO:0034765	regulation of ion transmembrane transport	9.76195	2.22871e-33	1.36768e-30	16517	Kcnj16
GO:0034765	regulation of ion transmembrane transport	9.76195	2.22871e-33	1.36768e-30	15165	Hcn1
GO:0034765	regulation of ion transmembrane transport	9.76195	2.22871e-33	1.36768e-30	170738	Kcnh7
GO:0034765	regulation of ion transmembrane transport	9.76195	2.22871e-33	1.36768e-30	12287	Cacna1b
GO:0034765	regulation of ion transmembrane transport	9.76195	2.22871e-33	1.36768e-30	16525	Kcnk1
GO:0034765	regulation of ion transmembrane transport	9.76195	2.22871e-33	1.36768e-30	105722	Ano6
GO:0034765	regulation of ion transmembrane transport	9.76195	2.22871e-33	1.36768e-30	16498	Kcnab2
GO:0034765	regulation of ion transmembrane transport	9.76195	2.22871e-33	1.36768e-30	20273	Scn8a
GO:0034765	regulation of ion transmembrane transport	9.76195	2.22871e-33	1.36768e-30	16524	Kcnj9
GO:0034765	regulation of ion transmembrane transport	9.76195	2.22871e-33	1.36768e-30	16536	Kcnq2
GO:0034765	regulation of ion transmembrane transport	9.76195	2.22871e-33	1.36768e-30	12300	Cacng2
GO:0034765	regulation of ion transmembrane transport	9.76195	2.22871e-33	1.36768e-30	16514	Kcnj11
GO:0034765	regulation of ion transmembrane transport	9.76195	2.22871e-33	1.36768e-30	399548	Scn4b
GO:0034765	regulation of ion transmembrane transport	9.76195	2.22871e-33	1.36768e-30	16502	Kcnc1
GO:0034765	regulation of ion transmembrane transport	9.76195	2.22871e-33	1.36768e-30	16490	Kcna2
GO:0034765	regulation of ion transmembrane transport	9.76195	2.22871e-33	1.36768e-30	338370	Nalcn
GO:0034765	regulation of ion transmembrane transport	9.76195	2.22871e-33	1.36768e-30	16492	Kcna4
GO:0034765	regulation of ion transmembrane transport	9.76195	2.22871e-33	1.36768e-30	12290	Cacna1e
GO:0034765	regulation of ion transmembrane transport	9.76195	2.22871e-33	1.36768e-30	99738	Kcnc4
GO:0034765	regulation of ion transmembrane transport	9.76195	2.22871e-33	1.36768e-30	16518	Kcnj2
GO:0034765	regulation of ion transmembrane transport	9.76195	2.22871e-33	1.36768e-30	56808	Cacna2d2
GO:0034765	regulation of ion transmembrane transport	9.76195	2.22871e-33	1.36768e-30	114584	Clic1
GO:0034765	regulation of ion transmembrane transport	9.76195	2.22871e-33	1.36768e-30	235281	Scn3b
GO:0034765	regulation of ion transmembrane transport	9.76195	2.22871e-33	1.36768e-30	56461	Kcnip3
GO:0034765	regulation of ion transmembrane transport	9.76195	2.22871e-33	1.36768e-30	70357	Kcnip1
GO:0034765	regulation of ion transmembrane transport	9.76195	2.22871e-33	1.36768e-30	13058	Cybb
GO:0034765	regulation of ion transmembrane transport	9.76195	2.22871e-33	1.36768e-30	12298	Cacnb4
GO:0034765	regulation of ion transmembrane transport	9.76195	2.22871e-33	1.36768e-30	238271	Kcnh5
GO:0034765	regulation of ion transmembrane transport	9.76195	2.22871e-33	1.36768e-30	20265	Scn1a
GO:0034765	regulation of ion transmembrane transport	9.76195	2.22871e-33	1.36768e-30	56543	Kcnd3
GO:0034765	regulation of ion transmembrane transport	9.76195	2.22871e-33	1.36768e-30	16499	Kcnab3
GO:0034765	regulation of ion transmembrane transport	9.76195	2.22871e-33	1.36768e-30	16511	Kcnh2
GO:0034765	regulation of ion transmembrane transport	9.76195	2.22871e-33	1.36768e-30	16504	Kcnc3
GO:0034765	regulation of ion transmembrane transport	9.76195	2.22871e-33	1.36768e-30	80906	Kcnip2
GO:0034765	regulation of ion transmembrane transport	9.76195	2.22871e-33	1.36768e-30	16485	Kcna1
GO:0034765	regulation of ion transmembrane transport	9.76195	2.22871e-33	1.36768e-30	16519	Kcnj3
GO:0034765	regulation of ion transmembrane transport	9.76195	2.22871e-33	1.36768e-30	16531	Kcnma1
GO:0034765	regulation of ion transmembrane transport	9.76195	2.22871e-33	1.36768e-30	15166	Hcn2
GO:0034765	regulation of ion transmembrane transport	9.76195	2.22871e-33	1.36768e-30	66733	Kcng4
GO:0034765	regulation of ion transmembrane transport	9.76195	2.22871e-33	1.36768e-30	140723	Cacng5
GO:0034765	regulation of ion transmembrane transport	9.76195	2.22871e-33	1.36768e-30	12296	Cacnb2
GO:0006629	lipid metabolic process	5.55673	3.88301e-33	2.04247e-30	14104	Fasn
GO:0006629	lipid metabolic process	5.55673	3.88301e-33	2.04247e-30	21391	Tbxas1
GO:0006629	lipid metabolic process	5.55673	3.88301e-33	2.04247e-30	53897	Gal3st1
GO:0006629	lipid metabolic process	5.55673	3.88301e-33	2.04247e-30	19223	Ptgis
GO:0006629	lipid metabolic process	5.55673	3.88301e-33	2.04247e-30	66857	Plbd1
GO:0006629	lipid metabolic process	5.55673	3.88301e-33	2.04247e-30	230101	Gba2
GO:0006629	lipid metabolic process	5.55673	3.88301e-33	2.04247e-30	78925	Srd5a1
GO:0006629	lipid metabolic process	5.55673	3.88301e-33	2.04247e-30	16835	Ldlr
GO:0006629	lipid metabolic process	5.55673	3.88301e-33	2.04247e-30	68671	Pcyt2
GO:0006629	lipid metabolic process	5.55673	3.88301e-33	2.04247e-30	74754	Dhcr24
GO:0006629	lipid metabolic process	5.55673	3.88301e-33	2.04247e-30	12642	Ch25h
GO:0006629	lipid metabolic process	5.55673	3.88301e-33	2.04247e-30	16956	Lpl
GO:0006629	lipid metabolic process	5.55673	3.88301e-33	2.04247e-30	235293	Sc5d
GO:0006629	lipid metabolic process	5.55673	3.88301e-33	2.04247e-30	192654	Pla2g15
GO:0006629	lipid metabolic process	5.55673	3.88301e-33	2.04247e-30	22359	Vldlr
GO:0006629	lipid metabolic process	5.55673	3.88301e-33	2.04247e-30	13116	Cyp46a1
GO:0006629	lipid metabolic process	5.55673	3.88301e-33	2.04247e-30	78894	Aacs
GO:0006629	lipid metabolic process	5.55673	3.88301e-33	2.04247e-30	338521	Fa2h
GO:0006629	lipid metabolic process	5.55673	3.88301e-33	2.04247e-30	74559	Elovl7
GO:0006629	lipid metabolic process	5.55673	3.88301e-33	2.04247e-30	54447	Asah2
GO:0006629	lipid metabolic process	5.55673	3.88301e-33	2.04247e-30	18606	Enpp2
GO:0006629	lipid metabolic process	5.55673	3.88301e-33	2.04247e-30	20652	Soat1
GO:0006629	lipid metabolic process	5.55673	3.88301e-33	2.04247e-30	54326	Elovl2
GO:0006629	lipid metabolic process	5.55673	3.88301e-33	2.04247e-30	330450	Far2
GO:0006629	lipid metabolic process	5.55673	3.88301e-33	2.04247e-30	18782	Pla2g2d
GO:0006629	lipid metabolic process	5.55673	3.88301e-33	2.04247e-30	15360	Hmgcs2
GO:0006629	lipid metabolic process	5.55673	3.88301e-33	2.04247e-30	99010	Lpcat4
GO:0006629	lipid metabolic process	5.55673	3.88301e-33	2.04247e-30	16987	Lss
GO:0006629	lipid metabolic process	5.55673	3.88301e-33	2.04247e-30	83603	Elovl4
GO:0006629	lipid metabolic process	5.55673	3.88301e-33	2.04247e-30	27281	Hrasls
GO:0006629	lipid metabolic process	5.55673	3.88301e-33	2.04247e-30	15446	Hpgd
GO:0006629	lipid metabolic process	5.55673	3.88301e-33	2.04247e-30	64292	Ptges
GO:0006629	lipid metabolic process	5.55673	3.88301e-33	2.04247e-30	26458	Slc27a2
GO:0006629	lipid metabolic process	5.55673	3.88301e-33	2.04247e-30	14137	Fdft1
GO:0006629	lipid metabolic process	5.55673	3.88301e-33	2.04247e-30	20788	Srebf2
GO:0006629	lipid metabolic process	5.55673	3.88301e-33	2.04247e-30	67512	Agpat2
GO:0006629	lipid metabolic process	5.55673	3.88301e-33	2.04247e-30	241274	Pnpla7
GO:0006629	lipid metabolic process	5.55673	3.88301e-33	2.04247e-30	216739	Acsl6
GO:0006629	lipid metabolic process	5.55673	3.88301e-33	2.04247e-30	104759	Pld4
GO:0006629	lipid metabolic process	5.55673	3.88301e-33	2.04247e-30	18563	Pcx
GO:0006629	lipid metabolic process	5.55673	3.88301e-33	2.04247e-30	16889	Lipa
GO:0006629	lipid metabolic process	5.55673	3.88301e-33	2.04247e-30	19225	Ptgs2
GO:0006629	lipid metabolic process	5.55673	3.88301e-33	2.04247e-30	52538	Acaa2
GO:0006629	lipid metabolic process	5.55673	3.88301e-33	2.04247e-30	14775	Gpx1
GO:0006629	lipid metabolic process	5.55673	3.88301e-33	2.04247e-30	20249	Scd1
GO:0006629	lipid metabolic process	5.55673	3.88301e-33	2.04247e-30	239559	A4galt
GO:0006629	lipid metabolic process	5.55673	3.88301e-33	2.04247e-30	234779	Plcg2
GO:0006629	lipid metabolic process	5.55673	3.88301e-33	2.04247e-30	67963	Npc2
GO:0006629	lipid metabolic process	5.55673	3.88301e-33	2.04247e-30	108079	Prkaa2
GO:0006629	lipid metabolic process	5.55673	3.88301e-33	2.04247e-30	71780	Isyna1
GO:0006629	lipid metabolic process	5.55673	3.88301e-33	2.04247e-30	20397	Sgpl1
GO:0006629	lipid metabolic process	5.55673	3.88301e-33	2.04247e-30	54486	Hpgds
GO:0006629	lipid metabolic process	5.55673	3.88301e-33	2.04247e-30	73166	Tm7sf2
GO:0006629	lipid metabolic process	5.55673	3.88301e-33	2.04247e-30	20449	St8sia1
GO:0006629	lipid metabolic process	5.55673	3.88301e-33	2.04247e-30	17855	Mvk
GO:0006629	lipid metabolic process	5.55673	3.88301e-33	2.04247e-30	106529	Tecr
GO:0006629	lipid metabolic process	5.55673	3.88301e-33	2.04247e-30	14466	Gba
GO:0006629	lipid metabolic process	5.55673	3.88301e-33	2.04247e-30	22239	Ugt8a
GO:0006629	lipid metabolic process	5.55673	3.88301e-33	2.04247e-30	170439	Elovl6
GO:0006629	lipid metabolic process	5.55673	3.88301e-33	2.04247e-30	29859	Sult4a1
GO:0006629	lipid metabolic process	5.55673	3.88301e-33	2.04247e-30	66234	Sc4mol
GO:0006629	lipid metabolic process	5.55673	3.88301e-33	2.04247e-30	236899	Pcyt1b
GO:0006629	lipid metabolic process	5.55673	3.88301e-33	2.04247e-30	19156	Psap
GO:0006629	lipid metabolic process	5.55673	3.88301e-33	2.04247e-30	269437	Plch1
GO:0006629	lipid metabolic process	5.55673	3.88301e-33	2.04247e-30	66775	Ptplad2
GO:0006629	lipid metabolic process	5.55673	3.88301e-33	2.04247e-30	104112	Acly
GO:0006629	lipid metabolic process	5.55673	3.88301e-33	2.04247e-30	20660	Sorl1
GO:0006629	lipid metabolic process	5.55673	3.88301e-33	2.04247e-30	74596	Cds1
GO:0006629	lipid metabolic process	5.55673	3.88301e-33	2.04247e-30	208715	Hmgcs1
GO:0006629	lipid metabolic process	5.55673	3.88301e-33	2.04247e-30	74205	Acsl3
GO:0006629	lipid metabolic process	5.55673	3.88301e-33	2.04247e-30	13121	Cyp51
GO:0006629	lipid metabolic process	5.55673	3.88301e-33	2.04247e-30	21835	Thrsp
GO:0006629	lipid metabolic process	5.55673	3.88301e-33	2.04247e-30	231070	Insig1
GO:0006629	lipid metabolic process	5.55673	3.88301e-33	2.04247e-30	15357	Hmgcr
GO:0006629	lipid metabolic process	5.55673	3.88301e-33	2.04247e-30	11886	Asah1
GO:0016310	phosphorylation	4.25301	2.50212e-32	1.1516e-29	13839	Epha5
GO:0016310	phosphorylation	4.25301	2.50212e-32	1.1516e-29	18481	Pak3
GO:0016310	phosphorylation	4.25301	2.50212e-32	1.1516e-29	98267	Stk17b
GO:0016310	phosphorylation	4.25301	2.50212e-32	1.1516e-29	217480	Dgkb
GO:0016310	phosphorylation	4.25301	2.50212e-32	1.1516e-29	12571	Cdk6
GO:0016310	phosphorylation	4.25301	2.50212e-32	1.1516e-29	27206	Nrk
GO:0016310	phosphorylation	4.25301	2.50212e-32	1.1516e-29	13837	Epha3
GO:0016310	phosphorylation	4.25301	2.50212e-32	1.1516e-29	320207	Pik3r5
GO:0016310	phosphorylation	4.25301	2.50212e-32	1.1516e-29	331374	Dgkk
GO:0016310	phosphorylation	4.25301	2.50212e-32	1.1516e-29	327655	Ppip5k1
GO:0016310	phosphorylation	4.25301	2.50212e-32	1.1516e-29	26412	Map4k2
GO:0016310	phosphorylation	4.25301	2.50212e-32	1.1516e-29	110197	Dgkg
GO:0016310	phosphorylation	4.25301	2.50212e-32	1.1516e-29	18642	Pfkm
GO:0016310	phosphorylation	4.25301	2.50212e-32	1.1516e-29	15277	Hk2
GO:0016310	phosphorylation	4.25301	2.50212e-32	1.1516e-29	17295	Met
GO:0016310	phosphorylation	4.25301	2.50212e-32	1.1516e-29	12569	Cdk5r1
GO:0016310	phosphorylation	4.25301	2.50212e-32	1.1516e-29	266632	Irak4
GO:0016310	phosphorylation	4.25301	2.50212e-32	1.1516e-29	19106	Eif2ak2
GO:0016310	phosphorylation	4.25301	2.50212e-32	1.1516e-29	18214	Ddr2
GO:0016310	phosphorylation	4.25301	2.50212e-32	1.1516e-29	270190	Ephb1
GO:0016310	phosphorylation	4.25301	2.50212e-32	1.1516e-29	73914	Irak3
GO:0016310	phosphorylation	4.25301	2.50212e-32	1.1516e-29	12978	Csf1r
GO:0016310	phosphorylation	4.25301	2.50212e-32	1.1516e-29	238161	Akap6
GO:0016310	phosphorylation	4.25301	2.50212e-32	1.1516e-29	12716	Ckmt1
GO:0016310	phosphorylation	4.25301	2.50212e-32	1.1516e-29	18596	Pdgfrb
GO:0016310	phosphorylation	4.25301	2.50212e-32	1.1516e-29	17289	Mertk
GO:0016310	phosphorylation	4.25301	2.50212e-32	1.1516e-29	20963	Syk
GO:0016310	phosphorylation	4.25301	2.50212e-32	1.1516e-29	17096	Lyn
GO:0016310	phosphorylation	4.25301	2.50212e-32	1.1516e-29	12322	Camk2a
GO:0016310	phosphorylation	4.25301	2.50212e-32	1.1516e-29	12566	Cdk2
GO:0016310	phosphorylation	4.25301	2.50212e-32	1.1516e-29	26398	Map2k4
GO:0016310	phosphorylation	4.25301	2.50212e-32	1.1516e-29	12323	Camk2b
GO:0016310	phosphorylation	4.25301	2.50212e-32	1.1516e-29	13649	Egfr
GO:0016310	phosphorylation	4.25301	2.50212e-32	1.1516e-29	26420	Mapk9
GO:0016310	phosphorylation	4.25301	2.50212e-32	1.1516e-29	13840	Epha6
GO:0016310	phosphorylation	4.25301	2.50212e-32	1.1516e-29	52033	Pbk
GO:0016310	phosphorylation	4.25301	2.50212e-32	1.1516e-29	21812	Tgfbr1
GO:0016310	phosphorylation	4.25301	2.50212e-32	1.1516e-29	215303	Camk1g
GO:0016310	phosphorylation	4.25301	2.50212e-32	1.1516e-29	14923	Guk1
GO:0016310	phosphorylation	4.25301	2.50212e-32	1.1516e-29	18792	Plau
GO:0016310	phosphorylation	4.25301	2.50212e-32	1.1516e-29	108079	Prkaa2
GO:0016310	phosphorylation	4.25301	2.50212e-32	1.1516e-29	17855	Mvk
GO:0016310	phosphorylation	4.25301	2.50212e-32	1.1516e-29	26362	Axl
GO:0016310	phosphorylation	4.25301	2.50212e-32	1.1516e-29	11302	Aatk
GO:0016310	phosphorylation	4.25301	2.50212e-32	1.1516e-29	12704	Cit
GO:0016310	phosphorylation	4.25301	2.50212e-32	1.1516e-29	18595	Pdgfra
GO:0016310	phosphorylation	4.25301	2.50212e-32	1.1516e-29	12229	Btk
GO:0016310	phosphorylation	4.25301	2.50212e-32	1.1516e-29	26404	Map3k12
GO:0016310	phosphorylation	4.25301	2.50212e-32	1.1516e-29	22177	Tyrobp
GO:0016310	phosphorylation	4.25301	2.50212e-32	1.1516e-29	226778	Mark1
GO:0016310	phosphorylation	4.25301	2.50212e-32	1.1516e-29	19085	Prkar1b
GO:0016310	phosphorylation	4.25301	2.50212e-32	1.1516e-29	71091	Cdkl1
GO:0016310	phosphorylation	4.25301	2.50212e-32	1.1516e-29	30957	Mapk8ip3
GO:0016310	phosphorylation	4.25301	2.50212e-32	1.1516e-29	12325	Camk2g
GO:0016310	phosphorylation	4.25301	2.50212e-32	1.1516e-29	55984	Camkk1
GO:0016310	phosphorylation	4.25301	2.50212e-32	1.1516e-29	18479	Pak1
GO:0016310	phosphorylation	4.25301	2.50212e-32	1.1516e-29	233328	Lrrk1
GO:0016310	phosphorylation	4.25301	2.50212e-32	1.1516e-29	18817	Plk1
GO:0016310	phosphorylation	4.25301	2.50212e-32	1.1516e-29	19094	Mapk11
GO:0016310	phosphorylation	4.25301	2.50212e-32	1.1516e-29	18753	Prkcd
GO:0016310	phosphorylation	4.25301	2.50212e-32	1.1516e-29	18793	Plaur
GO:0016310	phosphorylation	4.25301	2.50212e-32	1.1516e-29	75607	Wnk2
GO:0016310	phosphorylation	4.25301	2.50212e-32	1.1516e-29	19229	Ptk2b
GO:0016310	phosphorylation	4.25301	2.50212e-32	1.1516e-29	19766	Ripk1
GO:0016310	phosphorylation	4.25301	2.50212e-32	1.1516e-29	21813	Tgfbr2
GO:0016310	phosphorylation	4.25301	2.50212e-32	1.1516e-29	18213	Ntrk3
GO:0016310	phosphorylation	4.25301	2.50212e-32	1.1516e-29	56421	Pfkp
GO:0016310	phosphorylation	4.25301	2.50212e-32	1.1516e-29	15559	Htr2b
GO:0016310	phosphorylation	4.25301	2.50212e-32	1.1516e-29	26414	Mapk10
GO:0016310	phosphorylation	4.25301	2.50212e-32	1.1516e-29	16885	Limk1
GO:0016310	phosphorylation	4.25301	2.50212e-32	1.1516e-29	26410	Map3k8
GO:0016310	phosphorylation	4.25301	2.50212e-32	1.1516e-29	14255	Flt3
GO:0016310	phosphorylation	4.25301	2.50212e-32	1.1516e-29	18762	Prkcz
GO:0016310	phosphorylation	4.25301	2.50212e-32	1.1516e-29	22174	Tyro3
GO:0016310	phosphorylation	4.25301	2.50212e-32	1.1516e-29	234854	Cdk10
GO:0016310	phosphorylation	4.25301	2.50212e-32	1.1516e-29	56489	Ikbke
GO:0016310	phosphorylation	4.25301	2.50212e-32	1.1516e-29	106763	Ttbk1
GO:0016310	phosphorylation	4.25301	2.50212e-32	1.1516e-29	60597	Mapk8ip2
GO:0016310	phosphorylation	4.25301	2.50212e-32	1.1516e-29	56527	Mast1
GO:0016310	phosphorylation	4.25301	2.50212e-32	1.1516e-29	70762	Dclk2
GO:0016310	phosphorylation	4.25301	2.50212e-32	1.1516e-29	26406	Map3k3
GO:0016310	phosphorylation	4.25301	2.50212e-32	1.1516e-29	18719	Pip5k1b
GO:0016310	phosphorylation	4.25301	2.50212e-32	1.1516e-29	338372	Map3k9
GO:0016310	phosphorylation	4.25301	2.50212e-32	1.1516e-29	30955	Pik3cg
GO:0016310	phosphorylation	4.25301	2.50212e-32	1.1516e-29	20393	Sgk1
GO:0016310	phosphorylation	4.25301	2.50212e-32	1.1516e-29	93843	Pnck
GO:0016310	phosphorylation	4.25301	2.50212e-32	1.1516e-29	245038	Dclk3
GO:0016310	phosphorylation	4.25301	2.50212e-32	1.1516e-29	51789	Tnk2
GO:0016310	phosphorylation	4.25301	2.50212e-32	1.1516e-29	229949	Ak5
GO:0016310	phosphorylation	4.25301	2.50212e-32	1.1516e-29	12534	Cdk1
GO:0016310	phosphorylation	4.25301	2.50212e-32	1.1516e-29	75770	Brsk2
GO:0016310	phosphorylation	4.25301	2.50212e-32	1.1516e-29	20112	Rps6ka2
GO:0016310	phosphorylation	4.25301	2.50212e-32	1.1516e-29	21682	Tec
GO:0016310	phosphorylation	4.25301	2.50212e-32	1.1516e-29	56077	Dgke
GO:0016310	phosphorylation	4.25301	2.50212e-32	1.1516e-29	107589	Mylk
GO:0016310	phosphorylation	4.25301	2.50212e-32	1.1516e-29	59126	Nek6
GO:0006915	apoptotic process	4.60152	4.09265e-30	1.67435e-27	18616	Peg3
GO:0006915	apoptotic process	4.60152	4.09265e-30	1.67435e-27	11803	Aplp1
GO:0006915	apoptotic process	4.60152	4.09265e-30	1.67435e-27	19766	Ripk1
GO:0006915	apoptotic process	4.60152	4.09265e-30	1.67435e-27	77771	Csrnp3
GO:0006915	apoptotic process	4.60152	4.09265e-30	1.67435e-27	383619	Aim2
GO:0006915	apoptotic process	4.60152	4.09265e-30	1.67435e-27	11799	Birc5
GO:0006915	apoptotic process	4.60152	4.09265e-30	1.67435e-27	12369	Casp7
GO:0006915	apoptotic process	4.60152	4.09265e-30	1.67435e-27	210801	Unc5d
GO:0006915	apoptotic process	4.60152	4.09265e-30	1.67435e-27	53945	Slc40a1
GO:0006915	apoptotic process	4.60152	4.09265e-30	1.67435e-27	14775	Gpx1
GO:0006915	apoptotic process	4.60152	4.09265e-30	1.67435e-27	21813	Tgfbr2
GO:0006915	apoptotic process	4.60152	4.09265e-30	1.67435e-27	107448	Unc5a
GO:0006915	apoptotic process	4.60152	4.09265e-30	1.67435e-27	235041	Kank2
GO:0006915	apoptotic process	4.60152	4.09265e-30	1.67435e-27	12363	Casp4
GO:0006915	apoptotic process	4.60152	4.09265e-30	1.67435e-27	12125	Bcl2l11
GO:0006915	apoptotic process	4.60152	4.09265e-30	1.67435e-27	54418	Fmn2
GO:0006915	apoptotic process	4.60152	4.09265e-30	1.67435e-27	20393	Sgk1
GO:0006915	apoptotic process	4.60152	4.09265e-30	1.67435e-27	68428	Steap3
GO:0006915	apoptotic process	4.60152	4.09265e-30	1.67435e-27	21812	Tgfbr1
GO:0006915	apoptotic process	4.60152	4.09265e-30	1.67435e-27	12018	Bak1
GO:0006915	apoptotic process	4.60152	4.09265e-30	1.67435e-27	75770	Brsk2
GO:0006915	apoptotic process	4.60152	4.09265e-30	1.67435e-27	12426	Cckbr
GO:0006915	apoptotic process	4.60152	4.09265e-30	1.67435e-27	76884	Cyfip2
GO:0006915	apoptotic process	4.60152	4.09265e-30	1.67435e-27	21937	Tnfrsf1a
GO:0006915	apoptotic process	4.60152	4.09265e-30	1.67435e-27	13132	Dab2
GO:0006915	apoptotic process	4.60152	4.09265e-30	1.67435e-27	223453	Dap
GO:0006915	apoptotic process	4.60152	4.09265e-30	1.67435e-27	12633	Cflar
GO:0006915	apoptotic process	4.60152	4.09265e-30	1.67435e-27	17969	Ncf1
GO:0006915	apoptotic process	4.60152	4.09265e-30	1.67435e-27	13837	Epha3
GO:0006915	apoptotic process	4.60152	4.09265e-30	1.67435e-27	72393	Faim2
GO:0006915	apoptotic process	4.60152	4.09265e-30	1.67435e-27	21981	Ppp1r13b
GO:0006915	apoptotic process	4.60152	4.09265e-30	1.67435e-27	56461	Kcnip3
GO:0006915	apoptotic process	4.60152	4.09265e-30	1.67435e-27	54447	Asah2
GO:0006915	apoptotic process	4.60152	4.09265e-30	1.67435e-27	12370	Casp8
GO:0006915	apoptotic process	4.60152	4.09265e-30	1.67435e-27	59126	Nek6
GO:0006915	apoptotic process	4.60152	4.09265e-30	1.67435e-27	11796	Birc3
GO:0006915	apoptotic process	4.60152	4.09265e-30	1.67435e-27	19073	Srgn
GO:0006915	apoptotic process	4.60152	4.09265e-30	1.67435e-27	66824	Pycard
GO:0006915	apoptotic process	4.60152	4.09265e-30	1.67435e-27	98267	Stk17b
GO:0006915	apoptotic process	4.60152	4.09265e-30	1.67435e-27	22035	Tnfsf10
GO:0006915	apoptotic process	4.60152	4.09265e-30	1.67435e-27	20358	Sema6a
GO:0006915	apoptotic process	4.60152	4.09265e-30	1.67435e-27	106869	Tnfaip8
GO:0006915	apoptotic process	4.60152	4.09265e-30	1.67435e-27	12925	Crip1
GO:0006915	apoptotic process	4.60152	4.09265e-30	1.67435e-27	16819	Lcn2
GO:0006915	apoptotic process	4.60152	4.09265e-30	1.67435e-27	11302	Aatk
GO:0006915	apoptotic process	4.60152	4.09265e-30	1.67435e-27	20397	Sgpl1
GO:0006915	apoptotic process	4.60152	4.09265e-30	1.67435e-27	22031	Traf3
GO:0006915	apoptotic process	4.60152	4.09265e-30	1.67435e-27	14744	Gpr65
GO:0006915	apoptotic process	4.60152	4.09265e-30	1.67435e-27	26398	Map2k4
GO:0006915	apoptotic process	4.60152	4.09265e-30	1.67435e-27	12534	Cdk1
GO:0006915	apoptotic process	4.60152	4.09265e-30	1.67435e-27	72168	Aifm3
GO:0006915	apoptotic process	4.60152	4.09265e-30	1.67435e-27	72512	Tmem173
GO:0006915	apoptotic process	4.60152	4.09265e-30	1.67435e-27	14415	Gad1
GO:0006915	apoptotic process	4.60152	4.09265e-30	1.67435e-27	53880	Naip7
GO:0006915	apoptotic process	4.60152	4.09265e-30	1.67435e-27	17951	Naip5
GO:0006915	apoptotic process	4.60152	4.09265e-30	1.67435e-27	13423	Dnase2a
GO:0006915	apoptotic process	4.60152	4.09265e-30	1.67435e-27	12229	Btk
GO:0006915	apoptotic process	4.60152	4.09265e-30	1.67435e-27	20202	S100a9
GO:0006915	apoptotic process	4.60152	4.09265e-30	1.67435e-27	17762	Mapt
GO:0006915	apoptotic process	4.60152	4.09265e-30	1.67435e-27	20201	S100a8
GO:0006915	apoptotic process	4.60152	4.09265e-30	1.67435e-27	12368	Casp6
GO:0006915	apoptotic process	4.60152	4.09265e-30	1.67435e-27	240725	Sulf1
GO:0006915	apoptotic process	4.60152	4.09265e-30	1.67435e-27	18479	Pak1
GO:0006915	apoptotic process	4.60152	4.09265e-30	1.67435e-27	12364	Casp12
GO:0006915	apoptotic process	4.60152	4.09265e-30	1.67435e-27	12069	Bex2
GO:0006915	apoptotic process	4.60152	4.09265e-30	1.67435e-27	66940	Shisa5
GO:0006915	apoptotic process	4.60152	4.09265e-30	1.67435e-27	23882	Gadd45g
GO:0006915	apoptotic process	4.60152	4.09265e-30	1.67435e-27	11785	Apbb1
GO:0006915	apoptotic process	4.60152	4.09265e-30	1.67435e-27	18753	Prkcd
GO:0006915	apoptotic process	4.60152	4.09265e-30	1.67435e-27	67900	Mtfp1
GO:0006915	apoptotic process	4.60152	4.09265e-30	1.67435e-27	12175	Bnip2
GO:0006915	apoptotic process	4.60152	4.09265e-30	1.67435e-27	73914	Irak3
GO:0006915	apoptotic process	4.60152	4.09265e-30	1.67435e-27	16985	Lsp1
GO:0006915	apoptotic process	4.60152	4.09265e-30	1.67435e-27	13176	Dcc
GO:0006915	apoptotic process	4.60152	4.09265e-30	1.67435e-27	16331	Inpp5d
GO:0006915	apoptotic process	4.60152	4.09265e-30	1.67435e-27	228355	Madd
GO:0006915	apoptotic process	4.60152	4.09265e-30	1.67435e-27	338372	Map3k9
GO:0006915	apoptotic process	4.60152	4.09265e-30	1.67435e-27	12424	Cck
GO:0006915	apoptotic process	4.60152	4.09265e-30	1.67435e-27	70676	Gulp1
GO:0006915	apoptotic process	4.60152	4.09265e-30	1.67435e-27	21944	Tnfsf12
GO:0006915	apoptotic process	4.60152	4.09265e-30	1.67435e-27	17948	Naip2
GO:0006915	apoptotic process	4.60152	4.09265e-30	1.67435e-27	64058	Perp
GO:0006468	protein phosphorylation	4.26519	4.13558e-29	1.52272e-26	13839	Epha5
GO:0006468	protein phosphorylation	4.26519	4.13558e-29	1.52272e-26	12534	Cdk1
GO:0006468	protein phosphorylation	4.26519	4.13558e-29	1.52272e-26	26404	Map3k12
GO:0006468	protein phosphorylation	4.26519	4.13558e-29	1.52272e-26	27206	Nrk
GO:0006468	protein phosphorylation	4.26519	4.13558e-29	1.52272e-26	30955	Pik3cg
GO:0006468	protein phosphorylation	4.26519	4.13558e-29	1.52272e-26	18214	Ddr2
GO:0006468	protein phosphorylation	4.26519	4.13558e-29	1.52272e-26	24014	Rnasel
GO:0006468	protein phosphorylation	4.26519	4.13558e-29	1.52272e-26	98267	Stk17b
GO:0006468	protein phosphorylation	4.26519	4.13558e-29	1.52272e-26	18481	Pak3
GO:0006468	protein phosphorylation	4.26519	4.13558e-29	1.52272e-26	18439	P2rx7
GO:0006468	protein phosphorylation	4.26519	4.13558e-29	1.52272e-26	55994	Smad9
GO:0006468	protein phosphorylation	4.26519	4.13558e-29	1.52272e-26	17096	Lyn
GO:0006468	protein phosphorylation	4.26519	4.13558e-29	1.52272e-26	26414	Mapk10
GO:0006468	protein phosphorylation	4.26519	4.13558e-29	1.52272e-26	11799	Birc5
GO:0006468	protein phosphorylation	4.26519	4.13558e-29	1.52272e-26	13837	Epha3
GO:0006468	protein phosphorylation	4.26519	4.13558e-29	1.52272e-26	13649	Egfr
GO:0006468	protein phosphorylation	4.26519	4.13558e-29	1.52272e-26	12325	Camk2g
GO:0006468	protein phosphorylation	4.26519	4.13558e-29	1.52272e-26	21812	Tgfbr1
GO:0006468	protein phosphorylation	4.26519	4.13558e-29	1.52272e-26	18762	Prkcz
GO:0006468	protein phosphorylation	4.26519	4.13558e-29	1.52272e-26	108079	Prkaa2
GO:0006468	protein phosphorylation	4.26519	4.13558e-29	1.52272e-26	17295	Met
GO:0006468	protein phosphorylation	4.26519	4.13558e-29	1.52272e-26	16009	Igfbp3
GO:0006468	protein phosphorylation	4.26519	4.13558e-29	1.52272e-26	19229	Ptk2b
GO:0006468	protein phosphorylation	4.26519	4.13558e-29	1.52272e-26	26420	Mapk9
GO:0006468	protein phosphorylation	4.26519	4.13558e-29	1.52272e-26	70568	Cpne3
GO:0006468	protein phosphorylation	4.26519	4.13558e-29	1.52272e-26	12704	Cit
GO:0006468	protein phosphorylation	4.26519	4.13558e-29	1.52272e-26	238271	Kcnh5
GO:0006468	protein phosphorylation	4.26519	4.13558e-29	1.52272e-26	19766	Ripk1
GO:0006468	protein phosphorylation	4.26519	4.13558e-29	1.52272e-26	19094	Mapk11
GO:0006468	protein phosphorylation	4.26519	4.13558e-29	1.52272e-26	21682	Tec
GO:0006468	protein phosphorylation	4.26519	4.13558e-29	1.52272e-26	11302	Aatk
GO:0006468	protein phosphorylation	4.26519	4.13558e-29	1.52272e-26	12229	Btk
GO:0006468	protein phosphorylation	4.26519	4.13558e-29	1.52272e-26	266632	Irak4
GO:0006468	protein phosphorylation	4.26519	4.13558e-29	1.52272e-26	12323	Camk2b
GO:0006468	protein phosphorylation	4.26519	4.13558e-29	1.52272e-26	235604	Camkv
GO:0006468	protein phosphorylation	4.26519	4.13558e-29	1.52272e-26	56489	Ikbke
GO:0006468	protein phosphorylation	4.26519	4.13558e-29	1.52272e-26	71091	Cdkl1
GO:0006468	protein phosphorylation	4.26519	4.13558e-29	1.52272e-26	211770	Trib1
GO:0006468	protein phosphorylation	4.26519	4.13558e-29	1.52272e-26	26406	Map3k3
GO:0006468	protein phosphorylation	4.26519	4.13558e-29	1.52272e-26	18753	Prkcd
GO:0006468	protein phosphorylation	4.26519	4.13558e-29	1.52272e-26	18479	Pak1
GO:0006468	protein phosphorylation	4.26519	4.13558e-29	1.52272e-26	20112	Rps6ka2
GO:0006468	protein phosphorylation	4.26519	4.13558e-29	1.52272e-26	21813	Tgfbr2
GO:0006468	protein phosphorylation	4.26519	4.13558e-29	1.52272e-26	52033	Pbk
GO:0006468	protein phosphorylation	4.26519	4.13558e-29	1.52272e-26	26398	Map2k4
GO:0006468	protein phosphorylation	4.26519	4.13558e-29	1.52272e-26	56527	Mast1
GO:0006468	protein phosphorylation	4.26519	4.13558e-29	1.52272e-26	14255	Flt3
GO:0006468	protein phosphorylation	4.26519	4.13558e-29	1.52272e-26	12569	Cdk5r1
GO:0006468	protein phosphorylation	4.26519	4.13558e-29	1.52272e-26	20963	Syk
GO:0006468	protein phosphorylation	4.26519	4.13558e-29	1.52272e-26	17289	Mertk
GO:0006468	protein phosphorylation	4.26519	4.13558e-29	1.52272e-26	107589	Mylk
GO:0006468	protein phosphorylation	4.26519	4.13558e-29	1.52272e-26	26412	Map4k2
GO:0006468	protein phosphorylation	4.26519	4.13558e-29	1.52272e-26	18213	Ntrk3
GO:0006468	protein phosphorylation	4.26519	4.13558e-29	1.52272e-26	106763	Ttbk1
GO:0006468	protein phosphorylation	4.26519	4.13558e-29	1.52272e-26	75607	Wnk2
GO:0006468	protein phosphorylation	4.26519	4.13558e-29	1.52272e-26	51789	Tnk2
GO:0006468	protein phosphorylation	4.26519	4.13558e-29	1.52272e-26	215303	Camk1g
GO:0006468	protein phosphorylation	4.26519	4.13558e-29	1.52272e-26	19106	Eif2ak2
GO:0006468	protein phosphorylation	4.26519	4.13558e-29	1.52272e-26	70762	Dclk2
GO:0006468	protein phosphorylation	4.26519	4.13558e-29	1.52272e-26	234854	Cdk10
GO:0006468	protein phosphorylation	4.26519	4.13558e-29	1.52272e-26	16885	Limk1
GO:0006468	protein phosphorylation	4.26519	4.13558e-29	1.52272e-26	59126	Nek6
GO:0006468	protein phosphorylation	4.26519	4.13558e-29	1.52272e-26	12322	Camk2a
GO:0006468	protein phosphorylation	4.26519	4.13558e-29	1.52272e-26	13840	Epha6
GO:0006468	protein phosphorylation	4.26519	4.13558e-29	1.52272e-26	22174	Tyro3
GO:0006468	protein phosphorylation	4.26519	4.13558e-29	1.52272e-26	21803	Tgfb1
GO:0006468	protein phosphorylation	4.26519	4.13558e-29	1.52272e-26	20393	Sgk1
GO:0006468	protein phosphorylation	4.26519	4.13558e-29	1.52272e-26	233328	Lrrk1
GO:0006468	protein phosphorylation	4.26519	4.13558e-29	1.52272e-26	18817	Plk1
GO:0006468	protein phosphorylation	4.26519	4.13558e-29	1.52272e-26	12571	Cdk6
GO:0006468	protein phosphorylation	4.26519	4.13558e-29	1.52272e-26	26410	Map3k8
GO:0006468	protein phosphorylation	4.26519	4.13558e-29	1.52272e-26	12566	Cdk2
GO:0006468	protein phosphorylation	4.26519	4.13558e-29	1.52272e-26	226778	Mark1
GO:0006468	protein phosphorylation	4.26519	4.13558e-29	1.52272e-26	18595	Pdgfra
GO:0006468	protein phosphorylation	4.26519	4.13558e-29	1.52272e-26	245038	Dclk3
GO:0006468	protein phosphorylation	4.26519	4.13558e-29	1.52272e-26	55984	Camkk1
GO:0006468	protein phosphorylation	4.26519	4.13558e-29	1.52272e-26	338372	Map3k9
GO:0006468	protein phosphorylation	4.26519	4.13558e-29	1.52272e-26	270190	Ephb1
GO:0006468	protein phosphorylation	4.26519	4.13558e-29	1.52272e-26	16510	Kcnh1
GO:0006468	protein phosphorylation	4.26519	4.13558e-29	1.52272e-26	12978	Csf1r
GO:0006468	protein phosphorylation	4.26519	4.13558e-29	1.52272e-26	75770	Brsk2
GO:0006468	protein phosphorylation	4.26519	4.13558e-29	1.52272e-26	19085	Prkar1b
GO:0006468	protein phosphorylation	4.26519	4.13558e-29	1.52272e-26	26362	Axl
GO:0006468	protein phosphorylation	4.26519	4.13558e-29	1.52272e-26	93843	Pnck
GO:0006468	protein phosphorylation	4.26519	4.13558e-29	1.52272e-26	73914	Irak3
GO:0006468	protein phosphorylation	4.26519	4.13558e-29	1.52272e-26	18596	Pdgfrb
GO:0055085	transmembrane transport	5.27346	2.8186e-28	9.43462e-26	57138	Slc12a5
GO:0055085	transmembrane transport	5.27346	2.8186e-28	9.43462e-26	16510	Kcnh1
GO:0055085	transmembrane transport	5.27346	2.8186e-28	9.43462e-26	50934	Slc7a8
GO:0055085	transmembrane transport	5.27346	2.8186e-28	9.43462e-26	56857	Slc37a2
GO:0055085	transmembrane transport	5.27346	2.8186e-28	9.43462e-26	74096	Hvcn1
GO:0055085	transmembrane transport	5.27346	2.8186e-28	9.43462e-26	110862	Kcnq3
GO:0055085	transmembrane transport	5.27346	2.8186e-28	9.43462e-26	22067	Trpc5
GO:0055085	transmembrane transport	5.27346	2.8186e-28	9.43462e-26	140919	Slc17a6
GO:0055085	transmembrane transport	5.27346	2.8186e-28	9.43462e-26	242773	Slc45a1
GO:0055085	transmembrane transport	5.27346	2.8186e-28	9.43462e-26	11941	Atp2b2
GO:0055085	transmembrane transport	5.27346	2.8186e-28	9.43462e-26	13521	Slc26a2
GO:0055085	transmembrane transport	5.27346	2.8186e-28	9.43462e-26	233979	Tpcn2
GO:0055085	transmembrane transport	5.27346	2.8186e-28	9.43462e-26	63993	Slc5a7
GO:0055085	transmembrane transport	5.27346	2.8186e-28	9.43462e-26	16490	Kcna2
GO:0055085	transmembrane transport	5.27346	2.8186e-28	9.43462e-26	14276	Folr2
GO:0055085	transmembrane transport	5.27346	2.8186e-28	9.43462e-26	26946	Trpc7
GO:0055085	transmembrane transport	5.27346	2.8186e-28	9.43462e-26	24059	Slco2a1
GO:0055085	transmembrane transport	5.27346	2.8186e-28	9.43462e-26	16531	Kcnma1
GO:0055085	transmembrane transport	5.27346	2.8186e-28	9.43462e-26	213053	Slc39a14
GO:0055085	transmembrane transport	5.27346	2.8186e-28	9.43462e-26	118454	Gjc2
GO:0055085	transmembrane transport	5.27346	2.8186e-28	9.43462e-26	15165	Hcn1
GO:0055085	transmembrane transport	5.27346	2.8186e-28	9.43462e-26	20273	Scn8a
GO:0055085	transmembrane transport	5.27346	2.8186e-28	9.43462e-26	238271	Kcnh5
GO:0055085	transmembrane transport	5.27346	2.8186e-28	9.43462e-26	21354	Tap1
GO:0055085	transmembrane transport	5.27346	2.8186e-28	9.43462e-26	56325	Abcb9
GO:0055085	transmembrane transport	5.27346	2.8186e-28	9.43462e-26	20499	Slc12a7
GO:0055085	transmembrane transport	5.27346	2.8186e-28	9.43462e-26	56543	Kcnd3
GO:0055085	transmembrane transport	5.27346	2.8186e-28	9.43462e-26	16492	Kcna4
GO:0055085	transmembrane transport	5.27346	2.8186e-28	9.43462e-26	16485	Kcna1
GO:0055085	transmembrane transport	5.27346	2.8186e-28	9.43462e-26	170738	Kcnh7
GO:0055085	transmembrane transport	5.27346	2.8186e-28	9.43462e-26	16511	Kcnh2
GO:0055085	transmembrane transport	5.27346	2.8186e-28	9.43462e-26	64051	Sv2a
GO:0055085	transmembrane transport	5.27346	2.8186e-28	9.43462e-26	99738	Kcnc4
GO:0055085	transmembrane transport	5.27346	2.8186e-28	9.43462e-26	58207	Slc43a3
GO:0055085	transmembrane transport	5.27346	2.8186e-28	9.43462e-26	20541	Slc8a1
GO:0055085	transmembrane transport	5.27346	2.8186e-28	9.43462e-26	22063	Trpc1
GO:0055085	transmembrane transport	5.27346	2.8186e-28	9.43462e-26	22784	Slc30a3
GO:0055085	transmembrane transport	5.27346	2.8186e-28	9.43462e-26	66859	Slc16a9
GO:0055085	transmembrane transport	5.27346	2.8186e-28	9.43462e-26	12889	Cplx1
GO:0055085	transmembrane transport	5.27346	2.8186e-28	9.43462e-26	59049	Slc22a17
GO:0055085	transmembrane transport	5.27346	2.8186e-28	9.43462e-26	227731	Slc25a25
GO:0055085	transmembrane transport	5.27346	2.8186e-28	9.43462e-26	18764	Pkd2
GO:0055085	transmembrane transport	5.27346	2.8186e-28	9.43462e-26	338370	Nalcn
GO:0055085	transmembrane transport	5.27346	2.8186e-28	9.43462e-26	76408	Abcc3
GO:0055085	transmembrane transport	5.27346	2.8186e-28	9.43462e-26	26372	Clcn6
GO:0055085	transmembrane transport	5.27346	2.8186e-28	9.43462e-26	240638	Slc16a12
GO:0055085	transmembrane transport	5.27346	2.8186e-28	9.43462e-26	20191	Ryr2
GO:0055085	transmembrane transport	5.27346	2.8186e-28	9.43462e-26	66868	Mfsd1
GO:0055085	transmembrane transport	5.27346	2.8186e-28	9.43462e-26	68666	Svop
GO:0055085	transmembrane transport	5.27346	2.8186e-28	9.43462e-26	16502	Kcnc1
GO:0055085	transmembrane transport	5.27346	2.8186e-28	9.43462e-26	12287	Cacna1b
GO:0055085	transmembrane transport	5.27346	2.8186e-28	9.43462e-26	64176	Sv2b
GO:0055085	transmembrane transport	5.27346	2.8186e-28	9.43462e-26	15166	Hcn2
GO:0055085	transmembrane transport	5.27346	2.8186e-28	9.43462e-26	406218	Panx2
GO:0055085	transmembrane transport	5.27346	2.8186e-28	9.43462e-26	18439	P2rx7
GO:0055085	transmembrane transport	5.27346	2.8186e-28	9.43462e-26	12290	Cacna1e
GO:0055085	transmembrane transport	5.27346	2.8186e-28	9.43462e-26	98682	Mfsd6
GO:0055085	transmembrane transport	5.27346	2.8186e-28	9.43462e-26	30791	Slc39a1
GO:0055085	transmembrane transport	5.27346	2.8186e-28	9.43462e-26	229731	Slc25a24
GO:0055085	transmembrane transport	5.27346	2.8186e-28	9.43462e-26	317750	Slc24a5
GO:0055085	transmembrane transport	5.27346	2.8186e-28	9.43462e-26	16504	Kcnc3
GO:0055085	transmembrane transport	5.27346	2.8186e-28	9.43462e-26	67473	Slc47a1
GO:0055085	transmembrane transport	5.27346	2.8186e-28	9.43462e-26	78830	Slc25a12
GO:0055085	transmembrane transport	5.27346	2.8186e-28	9.43462e-26	66733	Kcng4
GO:0055085	transmembrane transport	5.27346	2.8186e-28	9.43462e-26	16536	Kcnq2
GO:0055085	transmembrane transport	5.27346	2.8186e-28	9.43462e-26	236727	Slc9a7
GO:0055085	transmembrane transport	5.27346	2.8186e-28	9.43462e-26	20527	Slc2a3
GO:0007165	signal transduction	2.43846	3.61765e-27	1.11002e-24	208666	Diras1
GO:0007165	signal transduction	2.43846	3.61765e-27	1.11002e-24	11517	Adcyap1r1
GO:0007165	signal transduction	2.43846	3.61765e-27	1.11002e-24	11444	Chrnb2
GO:0007165	signal transduction	2.43846	3.61765e-27	1.11002e-24	12702	Socs3
GO:0007165	signal transduction	2.43846	3.61765e-27	1.11002e-24	170744	Tlr8
GO:0007165	signal transduction	2.43846	3.61765e-27	1.11002e-24	14681	Gnao1
GO:0007165	signal transduction	2.43846	3.61765e-27	1.11002e-24	18442	P2ry2
GO:0007165	signal transduction	2.43846	3.61765e-27	1.11002e-24	16847	Lepr
GO:0007165	signal transduction	2.43846	3.61765e-27	1.11002e-24	16510	Kcnh1
GO:0007165	signal transduction	2.43846	3.61765e-27	1.11002e-24	210933	Bai3
GO:0007165	signal transduction	2.43846	3.61765e-27	1.11002e-24	14608	Gpr83
GO:0007165	signal transduction	2.43846	3.61765e-27	1.11002e-24	140570	Plxnb2
GO:0007165	signal transduction	2.43846	3.61765e-27	1.11002e-24	214137	Arhgap29
GO:0007165	signal transduction	2.43846	3.61765e-27	1.11002e-24	232441	Rerg
GO:0007165	signal transduction	2.43846	3.61765e-27	1.11002e-24	14765	Gpr50
GO:0007165	signal transduction	2.43846	3.61765e-27	1.11002e-24	21897	Tlr1
GO:0007165	signal transduction	2.43846	3.61765e-27	1.11002e-24	21937	Tnfrsf1a
GO:0007165	signal transduction	2.43846	3.61765e-27	1.11002e-24	69550	Bst2
GO:0007165	signal transduction	2.43846	3.61765e-27	1.11002e-24	93675	Clec2i
GO:0007165	signal transduction	2.43846	3.61765e-27	1.11002e-24	279572	Tlr13
GO:0007165	signal transduction	2.43846	3.61765e-27	1.11002e-24	237716	Gpr75
GO:0007165	signal transduction	2.43846	3.61765e-27	1.11002e-24	14763	Gpr37
GO:0007165	signal transduction	2.43846	3.61765e-27	1.11002e-24	18386	Oprd1
GO:0007165	signal transduction	2.43846	3.61765e-27	1.11002e-24	14680	Gnal
GO:0007165	signal transduction	2.43846	3.61765e-27	1.11002e-24	215449	Rap1b
GO:0007165	signal transduction	2.43846	3.61765e-27	1.11002e-24	14130	Fcgr2b
GO:0007165	signal transduction	2.43846	3.61765e-27	1.11002e-24	16511	Kcnh2
GO:0007165	signal transduction	2.43846	3.61765e-27	1.11002e-24	18596	Pdgfrb
GO:0007165	signal transduction	2.43846	3.61765e-27	1.11002e-24	64075	Smoc1
GO:0007165	signal transduction	2.43846	3.61765e-27	1.11002e-24	18389	Oprl1
GO:0007165	signal transduction	2.43846	3.61765e-27	1.11002e-24	16177	Il1r1
GO:0007165	signal transduction	2.43846	3.61765e-27	1.11002e-24	319387	Lphn3
GO:0007165	signal transduction	2.43846	3.61765e-27	1.11002e-24	69721	Nkiras1
GO:0007165	signal transduction	2.43846	3.61765e-27	1.11002e-24	58861	Cysltr1
GO:0007165	signal transduction	2.43846	3.61765e-27	1.11002e-24	233571	P2ry6
GO:0007165	signal transduction	2.43846	3.61765e-27	1.11002e-24	94226	S1pr5
GO:0007165	signal transduction	2.43846	3.61765e-27	1.11002e-24	64095	Gpr35
GO:0007165	signal transduction	2.43846	3.61765e-27	1.11002e-24	12768	Ccr1
GO:0007165	signal transduction	2.43846	3.61765e-27	1.11002e-24	12267	C3ar1
GO:0007165	signal transduction	2.43846	3.61765e-27	1.11002e-24	14710	Gngt2
GO:0007165	signal transduction	2.43846	3.61765e-27	1.11002e-24	64010	Sav1
GO:0007165	signal transduction	2.43846	3.61765e-27	1.11002e-24	107527	Il1rl2
GO:0007165	signal transduction	2.43846	3.61765e-27	1.11002e-24	54712	Plxnc1
GO:0007165	signal transduction	2.43846	3.61765e-27	1.11002e-24	17925	Myo9b
GO:0007165	signal transduction	2.43846	3.61765e-27	1.11002e-24	107448	Unc5a
GO:0007165	signal transduction	2.43846	3.61765e-27	1.11002e-24	258384	Olfr1350
GO:0007165	signal transduction	2.43846	3.61765e-27	1.11002e-24	14676	Gna15
GO:0007165	signal transduction	2.43846	3.61765e-27	1.11002e-24	11536	Gpr182
GO:0007165	signal transduction	2.43846	3.61765e-27	1.11002e-24	226849	Ppp2r5a
GO:0007165	signal transduction	2.43846	3.61765e-27	1.11002e-24	170743	Tlr7
GO:0007165	signal transduction	2.43846	3.61765e-27	1.11002e-24	320492	A830018L16Rik
GO:0007165	signal transduction	2.43846	3.61765e-27	1.11002e-24	19766	Ripk1
GO:0007165	signal transduction	2.43846	3.61765e-27	1.11002e-24	23984	Pde10a
GO:0007165	signal transduction	2.43846	3.61765e-27	1.11002e-24	226652	Arhgap30
GO:0007165	signal transduction	2.43846	3.61765e-27	1.11002e-24	73914	Irak3
GO:0007165	signal transduction	2.43846	3.61765e-27	1.11002e-24	211577	Mrgprf
GO:0007165	signal transduction	2.43846	3.61765e-27	1.11002e-24	54393	Gabbr1
GO:0007165	signal transduction	2.43846	3.61765e-27	1.11002e-24	14748	Gpr3
GO:0007165	signal transduction	2.43846	3.61765e-27	1.11002e-24	21812	Tgfbr1
GO:0007165	signal transduction	2.43846	3.61765e-27	1.11002e-24	208898	Unc13c
GO:0007165	signal transduction	2.43846	3.61765e-27	1.11002e-24	74039	Nfam1
GO:0007165	signal transduction	2.43846	3.61765e-27	1.11002e-24	259075	Olfr641
GO:0007165	signal transduction	2.43846	3.61765e-27	1.11002e-24	320150	Zdhhc17
GO:0007165	signal transduction	2.43846	3.61765e-27	1.11002e-24	270190	Ephb1
GO:0007165	signal transduction	2.43846	3.61765e-27	1.11002e-24	243764	Chrm2
GO:0007165	signal transduction	2.43846	3.61765e-27	1.11002e-24	14160	Lgr5
GO:0007165	signal transduction	2.43846	3.61765e-27	1.11002e-24	321019	Gpr183
GO:0007165	signal transduction	2.43846	3.61765e-27	1.11002e-24	266632	Irak4
GO:0007165	signal transduction	2.43846	3.61765e-27	1.11002e-24	78514	Arhgap10
GO:0007165	signal transduction	2.43846	3.61765e-27	1.11002e-24	18387	Oprk1
GO:0007165	signal transduction	2.43846	3.61765e-27	1.11002e-24	14706	Gng4
GO:0007165	signal transduction	2.43846	3.61765e-27	1.11002e-24	15558	Htr2a
GO:0007165	signal transduction	2.43846	3.61765e-27	1.11002e-24	217835	Rin3
GO:0007165	signal transduction	2.43846	3.61765e-27	1.11002e-24	73010	Gpr22
GO:0007165	signal transduction	2.43846	3.61765e-27	1.11002e-24	210801	Unc5d
GO:0007165	signal transduction	2.43846	3.61765e-27	1.11002e-24	108699	Chn1
GO:0007165	signal transduction	2.43846	3.61765e-27	1.11002e-24	258845	Olfr1161
GO:0007165	signal transduction	2.43846	3.61765e-27	1.11002e-24	14788	Gpr162
GO:0007165	signal transduction	2.43846	3.61765e-27	1.11002e-24	67168	Lpar6
GO:0007165	signal transduction	2.43846	3.61765e-27	1.11002e-24	259302	Srgap3
GO:0007165	signal transduction	2.43846	3.61765e-27	1.11002e-24	243362	Stard13
GO:0007165	signal transduction	2.43846	3.61765e-27	1.11002e-24	71302	Arhgap26
GO:0007165	signal transduction	2.43846	3.61765e-27	1.11002e-24	258265	Olfr1333
GO:0007165	signal transduction	2.43846	3.61765e-27	1.11002e-24	67784	Plxnd1
GO:0007165	signal transduction	2.43846	3.61765e-27	1.11002e-24	14652	Glp1r
GO:0007165	signal transduction	2.43846	3.61765e-27	1.11002e-24	94214	Spock2
GO:0007165	signal transduction	2.43846	3.61765e-27	1.11002e-24	54519	Apbb1ip
GO:0007165	signal transduction	2.43846	3.61765e-27	1.11002e-24	93690	Gpr45
GO:0007165	signal transduction	2.43846	3.61765e-27	1.11002e-24	18798	Plcb4
GO:0007165	signal transduction	2.43846	3.61765e-27	1.11002e-24	12506	Cd48
GO:0007165	signal transduction	2.43846	3.61765e-27	1.11002e-24	26364	Cd97
GO:0007165	signal transduction	2.43846	3.61765e-27	1.11002e-24	238271	Kcnh5
GO:0007165	signal transduction	2.43846	3.61765e-27	1.11002e-24	16952	Anxa1
GO:0007165	signal transduction	2.43846	3.61765e-27	1.11002e-24	13733	Emr1
GO:0007165	signal transduction	2.43846	3.61765e-27	1.11002e-24	236920	Stard8
GO:0007165	signal transduction	2.43846	3.61765e-27	1.11002e-24	16985	Lsp1
GO:0007165	signal transduction	2.43846	3.61765e-27	1.11002e-24	17533	Mrc1
GO:0007165	signal transduction	2.43846	3.61765e-27	1.11002e-24	64074	Smoc2
GO:0007165	signal transduction	2.43846	3.61765e-27	1.11002e-24	71085	Arhgap19
GO:0007165	signal transduction	2.43846	3.61765e-27	1.11002e-24	140795	P2ry14
GO:0007165	signal transduction	2.43846	3.61765e-27	1.11002e-24	170738	Kcnh7
GO:0007165	signal transduction	2.43846	3.61765e-27	1.11002e-24	11549	Adra1a
GO:0007165	signal transduction	2.43846	3.61765e-27	1.11002e-24	68203	Diras2
GO:0007165	signal transduction	2.43846	3.61765e-27	1.11002e-24	234779	Plcg2
GO:0007165	signal transduction	2.43846	3.61765e-27	1.11002e-24	15559	Htr2b
GO:0007165	signal transduction	2.43846	3.61765e-27	1.11002e-24	330914	Arhgap32
GO:0007165	signal transduction	2.43846	3.61765e-27	1.11002e-24	241263	Gpr158
GO:0007165	signal transduction	2.43846	3.61765e-27	1.11002e-24	14747	Cmklr1
GO:0007165	signal transduction	2.43846	3.61765e-27	1.11002e-24	13051	Cx3cr1
GO:0007165	signal transduction	2.43846	3.61765e-27	1.11002e-24	330814	Lphn1
GO:0007165	signal transduction	2.43846	3.61765e-27	1.11002e-24	70497	Arhgap17
GO:0007165	signal transduction	2.43846	3.61765e-27	1.11002e-24	69710	Arap1
GO:0007165	signal transduction	2.43846	3.61765e-27	1.11002e-24	13649	Egfr
GO:0007165	signal transduction	2.43846	3.61765e-27	1.11002e-24	59126	Nek6
GO:0007165	signal transduction	2.43846	3.61765e-27	1.11002e-24	54199	Ccrl2
GO:0007165	signal transduction	2.43846	3.61765e-27	1.11002e-24	18762	Prkcz
GO:0007165	signal transduction	2.43846	3.61765e-27	1.11002e-24	18217	Ntsr2
GO:0007165	signal transduction	2.43846	3.61765e-27	1.11002e-24	15560	Htr2c
GO:0007165	signal transduction	2.43846	3.61765e-27	1.11002e-24	216831	Arhgap44
GO:0007165	signal transduction	2.43846	3.61765e-27	1.11002e-24	16859	Lgals9
GO:0007165	signal transduction	2.43846	3.61765e-27	1.11002e-24	237868	Sarm1
GO:0007165	signal transduction	2.43846	3.61765e-27	1.11002e-24	269643	Ppp2r2c
GO:0007165	signal transduction	2.43846	3.61765e-27	1.11002e-24	15242	Hhex
GO:0007165	signal transduction	2.43846	3.61765e-27	1.11002e-24	22045	Trhr
GO:0007165	signal transduction	2.43846	3.61765e-27	1.11002e-24	12801	Cnr1
GO:0007165	signal transduction	2.43846	3.61765e-27	1.11002e-24	11539	Adora1
GO:0007165	signal transduction	2.43846	3.61765e-27	1.11002e-24	277935	Olfr519
GO:0007165	signal transduction	2.43846	3.61765e-27	1.11002e-24	243743	Plxna4
GO:0007165	signal transduction	2.43846	3.61765e-27	1.11002e-24	14687	Gnaz
GO:0007165	signal transduction	2.43846	3.61765e-27	1.11002e-24	108069	Grm3
GO:0007165	signal transduction	2.43846	3.61765e-27	1.11002e-24	19085	Prkar1b
GO:0007165	signal transduction	2.43846	3.61765e-27	1.11002e-24	231805	Pilra
GO:0007165	signal transduction	2.43846	3.61765e-27	1.11002e-24	70719	Hmha1
GO:0007165	signal transduction	2.43846	3.61765e-27	1.11002e-24	229357	Gpr149
GO:0007165	signal transduction	2.43846	3.61765e-27	1.11002e-24	64337	Gng13
GO:0007165	signal transduction	2.43846	3.61765e-27	1.11002e-24	18577	Pde4a
GO:0007165	signal transduction	2.43846	3.61765e-27	1.11002e-24	13601	Ecm1
GO:0007165	signal transduction	2.43846	3.61765e-27	1.11002e-24	20852	Stat6
GO:0007165	signal transduction	2.43846	3.61765e-27	1.11002e-24	72902	Spock3
GO:0007165	signal transduction	2.43846	3.61765e-27	1.11002e-24	12426	Cckbr
GO:0007165	signal transduction	2.43846	3.61765e-27	1.11002e-24	18438	P2rx4
GO:0007165	signal transduction	2.43846	3.61765e-27	1.11002e-24	11733	Ank1
GO:0007165	signal transduction	2.43846	3.61765e-27	1.11002e-24	17874	Myd88
GO:0007165	signal transduction	2.43846	3.61765e-27	1.11002e-24	22031	Traf3
GO:0007165	signal transduction	2.43846	3.61765e-27	1.11002e-24	23890	Gpr34
GO:0007165	signal transduction	2.43846	3.61765e-27	1.11002e-24	13610	S1pr3
GO:0007165	signal transduction	2.43846	3.61765e-27	1.11002e-24	19099	Mapk8ip1
GO:0007165	signal transduction	2.43846	3.61765e-27	1.11002e-24	258483	Olfr1411
GO:0007165	signal transduction	2.43846	3.61765e-27	1.11002e-24	26410	Map3k8
GO:0007165	signal transduction	2.43846	3.61765e-27	1.11002e-24	218461	Pde8b
GO:0007165	signal transduction	2.43846	3.61765e-27	1.11002e-24	13617	Ednra
GO:0007165	signal transduction	2.43846	3.61765e-27	1.11002e-24	64297	Gprc5b
GO:0007165	signal transduction	2.43846	3.61765e-27	1.11002e-24	14064	F2rl2
GO:0007165	signal transduction	2.43846	3.61765e-27	1.11002e-24	21338	Tacr3
GO:0007165	signal transduction	2.43846	3.61765e-27	1.11002e-24	269437	Plch1
GO:0007165	signal transduction	2.43846	3.61765e-27	1.11002e-24	545205	Olfr111
GO:0007165	signal transduction	2.43846	3.61765e-27	1.11002e-24	78134	Lpar4
GO:0007165	signal transduction	2.43846	3.61765e-27	1.11002e-24	229949	Ak5
GO:0007165	signal transduction	2.43846	3.61765e-27	1.11002e-24	14704	Gng3
GO:0007165	signal transduction	2.43846	3.61765e-27	1.11002e-24	26362	Axl
GO:0007165	signal transduction	2.43846	3.61765e-27	1.11002e-24	11438	Chrna4
GO:0007165	signal transduction	2.43846	3.61765e-27	1.11002e-24	11441	Chrna7
GO:0007165	signal transduction	2.43846	3.61765e-27	1.11002e-24	14726	Pdpn
GO:0007165	signal transduction	2.43846	3.61765e-27	1.11002e-24	232201	Arhgap25
GO:0007165	signal transduction	2.43846	3.61765e-27	1.11002e-24	29875	Iqgap1
GO:0007165	signal transduction	2.43846	3.61765e-27	1.11002e-24	228482	Arhgap11a
GO:0007165	signal transduction	2.43846	3.61765e-27	1.11002e-24	93694	Clec2d
GO:0007165	signal transduction	2.43846	3.61765e-27	1.11002e-24	13489	Drd2
GO:0007165	signal transduction	2.43846	3.61765e-27	1.11002e-24	268932	Caskin1
GO:0007165	signal transduction	2.43846	3.61765e-27	1.11002e-24	207911	Mchr1
GO:0007165	signal transduction	2.43846	3.61765e-27	1.11002e-24	14744	Gpr65
GO:0007165	signal transduction	2.43846	3.61765e-27	1.11002e-24	17096	Lyn
GO:0007165	signal transduction	2.43846	3.61765e-27	1.11002e-24	14127	Fcer1g
GO:0007165	signal transduction	2.43846	3.61765e-27	1.11002e-24	66940	Shisa5
GO:0007165	signal transduction	2.43846	3.61765e-27	1.11002e-24	11735	Ank3
GO:0007165	signal transduction	2.43846	3.61765e-27	1.11002e-24	24088	Tlr2
GO:0007165	signal transduction	2.43846	3.61765e-27	1.11002e-24	268934	Grm4
GO:0007165	signal transduction	2.43846	3.61765e-27	1.11002e-24	23969	Pacsin1
GO:0006813	potassium ion transport	8.92638	5.39212e-25	1.52721e-22	16498	Kcnab2
GO:0006813	potassium ion transport	8.92638	5.39212e-25	1.52721e-22	238271	Kcnh5
GO:0006813	potassium ion transport	8.92638	5.39212e-25	1.52721e-22	18195	Nsf
GO:0006813	potassium ion transport	8.92638	5.39212e-25	1.52721e-22	236727	Slc9a7
GO:0006813	potassium ion transport	8.92638	5.39212e-25	1.52721e-22	57138	Slc12a5
GO:0006813	potassium ion transport	8.92638	5.39212e-25	1.52721e-22	16510	Kcnh1
GO:0006813	potassium ion transport	8.92638	5.39212e-25	1.52721e-22	110862	Kcnq3
GO:0006813	potassium ion transport	8.92638	5.39212e-25	1.52721e-22	15166	Hcn2
GO:0006813	potassium ion transport	8.92638	5.39212e-25	1.52721e-22	56543	Kcnd3
GO:0006813	potassium ion transport	8.92638	5.39212e-25	1.52721e-22	12566	Cdk2
GO:0006813	potassium ion transport	8.92638	5.39212e-25	1.52721e-22	16528	Kcnk4
GO:0006813	potassium ion transport	8.92638	5.39212e-25	1.52721e-22	16511	Kcnh2
GO:0006813	potassium ion transport	8.92638	5.39212e-25	1.52721e-22	80906	Kcnip2
GO:0006813	potassium ion transport	8.92638	5.39212e-25	1.52721e-22	16531	Kcnma1
GO:0006813	potassium ion transport	8.92638	5.39212e-25	1.52721e-22	16517	Kcnj16
GO:0006813	potassium ion transport	8.92638	5.39212e-25	1.52721e-22	20265	Scn1a
GO:0006813	potassium ion transport	8.92638	5.39212e-25	1.52721e-22	317750	Slc24a5
GO:0006813	potassium ion transport	8.92638	5.39212e-25	1.52721e-22	16514	Kcnj11
GO:0006813	potassium ion transport	8.92638	5.39212e-25	1.52721e-22	16536	Kcnq2
GO:0006813	potassium ion transport	8.92638	5.39212e-25	1.52721e-22	16519	Kcnj3
GO:0006813	potassium ion transport	8.92638	5.39212e-25	1.52721e-22	16524	Kcnj9
GO:0006813	potassium ion transport	8.92638	5.39212e-25	1.52721e-22	56461	Kcnip3
GO:0006813	potassium ion transport	8.92638	5.39212e-25	1.52721e-22	70357	Kcnip1
GO:0006813	potassium ion transport	8.92638	5.39212e-25	1.52721e-22	16504	Kcnc3
GO:0006813	potassium ion transport	8.92638	5.39212e-25	1.52721e-22	170738	Kcnh7
GO:0006813	potassium ion transport	8.92638	5.39212e-25	1.52721e-22	66733	Kcng4
GO:0006813	potassium ion transport	8.92638	5.39212e-25	1.52721e-22	16499	Kcnab3
GO:0006813	potassium ion transport	8.92638	5.39212e-25	1.52721e-22	20499	Slc12a7
GO:0006813	potassium ion transport	8.92638	5.39212e-25	1.52721e-22	16492	Kcna4
GO:0006813	potassium ion transport	8.92638	5.39212e-25	1.52721e-22	16525	Kcnk1
GO:0006813	potassium ion transport	8.92638	5.39212e-25	1.52721e-22	99738	Kcnc4
GO:0006813	potassium ion transport	8.92638	5.39212e-25	1.52721e-22	16485	Kcna1
GO:0006813	potassium ion transport	8.92638	5.39212e-25	1.52721e-22	16518	Kcnj2
GO:0006813	potassium ion transport	8.92638	5.39212e-25	1.52721e-22	15165	Hcn1
GO:0006813	potassium ion transport	8.92638	5.39212e-25	1.52721e-22	16490	Kcna2
GO:0006813	potassium ion transport	8.92638	5.39212e-25	1.52721e-22	16502	Kcnc1
GO:0006813	potassium ion transport	8.92638	5.39212e-25	1.52721e-22	11931	Atp1b1
GO:0006813	potassium ion transport	8.92638	5.39212e-25	1.52721e-22	232975	Atp1a3
GO:0007268	synaptic transmission	9.56928	6.69722e-25	1.76137e-22	208898	Unc13c
GO:0007268	synaptic transmission	9.56928	6.69722e-25	1.76137e-22	18190	Nrxn2
GO:0007268	synaptic transmission	9.56928	6.69722e-25	1.76137e-22	14406	Gabrg2
GO:0007268	synaptic transmission	9.56928	6.69722e-25	1.76137e-22	57138	Slc12a5
GO:0007268	synaptic transmission	9.56928	6.69722e-25	1.76137e-22	382018	Unc13a
GO:0007268	synaptic transmission	9.56928	6.69722e-25	1.76137e-22	20977	Syp
GO:0007268	synaptic transmission	9.56928	6.69722e-25	1.76137e-22	20617	Snca
GO:0007268	synaptic transmission	9.56928	6.69722e-25	1.76137e-22	16531	Kcnma1
GO:0007268	synaptic transmission	9.56928	6.69722e-25	1.76137e-22	20618	Sncg
GO:0007268	synaptic transmission	9.56928	6.69722e-25	1.76137e-22	12564	Cdh8
GO:0007268	synaptic transmission	9.56928	6.69722e-25	1.76137e-22	243764	Chrm2
GO:0007268	synaptic transmission	9.56928	6.69722e-25	1.76137e-22	14800	Gria2
GO:0007268	synaptic transmission	9.56928	6.69722e-25	1.76137e-22	14806	Grik2
GO:0007268	synaptic transmission	9.56928	6.69722e-25	1.76137e-22	14799	Gria1
GO:0007268	synaptic transmission	9.56928	6.69722e-25	1.76137e-22	110886	Gabra5
GO:0007268	synaptic transmission	9.56928	6.69722e-25	1.76137e-22	104069	Sncb
GO:0007268	synaptic transmission	9.56928	6.69722e-25	1.76137e-22	56216	Stx1b
GO:0007268	synaptic transmission	9.56928	6.69722e-25	1.76137e-22	15560	Htr2c
GO:0007268	synaptic transmission	9.56928	6.69722e-25	1.76137e-22	14802	Gria4
GO:0007268	synaptic transmission	9.56928	6.69722e-25	1.76137e-22	14658	Glrb
GO:0007268	synaptic transmission	9.56928	6.69722e-25	1.76137e-22	20616	Snap91
GO:0007268	synaptic transmission	9.56928	6.69722e-25	1.76137e-22	64051	Sv2a
GO:0007268	synaptic transmission	9.56928	6.69722e-25	1.76137e-22	224997	Dlgap1
GO:0007268	synaptic transmission	9.56928	6.69722e-25	1.76137e-22	14810	Grin1
GO:0007268	synaptic transmission	9.56928	6.69722e-25	1.76137e-22	14812	Grin2b
GO:0007268	synaptic transmission	9.56928	6.69722e-25	1.76137e-22	64176	Sv2b
GO:0007268	synaptic transmission	9.56928	6.69722e-25	1.76137e-22	319924	Apba1
GO:0007268	synaptic transmission	9.56928	6.69722e-25	1.76137e-22	65945	Clstn1
GO:0007268	synaptic transmission	9.56928	6.69722e-25	1.76137e-22	14654	Glra1
GO:0007268	synaptic transmission	9.56928	6.69722e-25	1.76137e-22	12647	Chat
GO:0007268	synaptic transmission	9.56928	6.69722e-25	1.76137e-22	268934	Grm4
GO:0007268	synaptic transmission	9.56928	6.69722e-25	1.76137e-22	12296	Cacnb2
GO:0007268	synaptic transmission	9.56928	6.69722e-25	1.76137e-22	18217	Ntsr2
GO:0007268	synaptic transmission	9.56928	6.69722e-25	1.76137e-22	14811	Grin2a
GO:0007268	synaptic transmission	9.56928	6.69722e-25	1.76137e-22	14396	Gabra3
GO:0007268	synaptic transmission	9.56928	6.69722e-25	1.76137e-22	11784	Apba2
GO:0035556	intracellular signal transduction	6.08538	9.66327e-24	2.37201e-21	224129	Adcy5
GO:0035556	intracellular signal transduction	6.08538	9.66327e-24	2.37201e-21	208898	Unc13c
GO:0035556	intracellular signal transduction	6.08538	9.66327e-24	2.37201e-21	17060	Blnk
GO:0035556	intracellular signal transduction	6.08538	9.66327e-24	2.37201e-21	217480	Dgkb
GO:0035556	intracellular signal transduction	6.08538	9.66327e-24	2.37201e-21	12794	Cnih2
GO:0035556	intracellular signal transduction	6.08538	9.66327e-24	2.37201e-21	17925	Myo9b
GO:0035556	intracellular signal transduction	6.08538	9.66327e-24	2.37201e-21	108699	Chn1
GO:0035556	intracellular signal transduction	6.08538	9.66327e-24	2.37201e-21	217154	Stac2
GO:0035556	intracellular signal transduction	6.08538	9.66327e-24	2.37201e-21	110197	Dgkg
GO:0035556	intracellular signal transduction	6.08538	9.66327e-24	2.37201e-21	218461	Pde8b
GO:0035556	intracellular signal transduction	6.08538	9.66327e-24	2.37201e-21	11515	Adcy9
GO:0035556	intracellular signal transduction	6.08538	9.66327e-24	2.37201e-21	245038	Dclk3
GO:0035556	intracellular signal transduction	6.08538	9.66327e-24	2.37201e-21	67296	Socs4
GO:0035556	intracellular signal transduction	6.08538	9.66327e-24	2.37201e-21	17207	Mcf2l
GO:0035556	intracellular signal transduction	6.08538	9.66327e-24	2.37201e-21	56193	Plek
GO:0035556	intracellular signal transduction	6.08538	9.66327e-24	2.37201e-21	12704	Cit
GO:0035556	intracellular signal transduction	6.08538	9.66327e-24	2.37201e-21	18753	Prkcd
GO:0035556	intracellular signal transduction	6.08538	9.66327e-24	2.37201e-21	269437	Plch1
GO:0035556	intracellular signal transduction	6.08538	9.66327e-24	2.37201e-21	20254	Scg2
GO:0035556	intracellular signal transduction	6.08538	9.66327e-24	2.37201e-21	20963	Syk
GO:0035556	intracellular signal transduction	6.08538	9.66327e-24	2.37201e-21	12229	Btk
GO:0035556	intracellular signal transduction	6.08538	9.66327e-24	2.37201e-21	22324	Vav1
GO:0035556	intracellular signal transduction	6.08538	9.66327e-24	2.37201e-21	17096	Lyn
GO:0035556	intracellular signal transduction	6.08538	9.66327e-24	2.37201e-21	20416	Shc1
GO:0035556	intracellular signal transduction	6.08538	9.66327e-24	2.37201e-21	11514	Adcy8
GO:0035556	intracellular signal transduction	6.08538	9.66327e-24	2.37201e-21	331374	Dgkk
GO:0035556	intracellular signal transduction	6.08538	9.66327e-24	2.37201e-21	24012	Rgs7
GO:0035556	intracellular signal transduction	6.08538	9.66327e-24	2.37201e-21	18762	Prkcz
GO:0035556	intracellular signal transduction	6.08538	9.66327e-24	2.37201e-21	234779	Plcg2
GO:0035556	intracellular signal transduction	6.08538	9.66327e-24	2.37201e-21	74039	Nfam1
GO:0035556	intracellular signal transduction	6.08538	9.66327e-24	2.37201e-21	217944	Rapgef5
GO:0035556	intracellular signal transduction	6.08538	9.66327e-24	2.37201e-21	54607	Socs6
GO:0035556	intracellular signal transduction	6.08538	9.66327e-24	2.37201e-21	226970	Arhgef4
GO:0035556	intracellular signal transduction	6.08538	9.66327e-24	2.37201e-21	56077	Dgke
GO:0035556	intracellular signal transduction	6.08538	9.66327e-24	2.37201e-21	19417	Rasgrf1
GO:0035556	intracellular signal transduction	6.08538	9.66327e-24	2.37201e-21	216233	Socs2
GO:0035556	intracellular signal transduction	6.08538	9.66327e-24	2.37201e-21	72978	Cnih3
GO:0035556	intracellular signal transduction	6.08538	9.66327e-24	2.37201e-21	70762	Dclk2
GO:0035556	intracellular signal transduction	6.08538	9.66327e-24	2.37201e-21	214137	Arhgap29
GO:0035556	intracellular signal transduction	6.08538	9.66327e-24	2.37201e-21	15170	Ptpn6
GO:0035556	intracellular signal transduction	6.08538	9.66327e-24	2.37201e-21	210044	Adcy2
GO:0035556	intracellular signal transduction	6.08538	9.66327e-24	2.37201e-21	20418	Shc3
GO:0035556	intracellular signal transduction	6.08538	9.66327e-24	2.37201e-21	12702	Socs3
GO:0035556	intracellular signal transduction	6.08538	9.66327e-24	2.37201e-21	142688	Asb13
GO:0035556	intracellular signal transduction	6.08538	9.66327e-24	2.37201e-21	70719	Hmha1
GO:0035556	intracellular signal transduction	6.08538	9.66327e-24	2.37201e-21	16331	Inpp5d
GO:0035556	intracellular signal transduction	6.08538	9.66327e-24	2.37201e-21	54195	Gucy1b3
GO:0035556	intracellular signal transduction	6.08538	9.66327e-24	2.37201e-21	21682	Tec
GO:0035556	intracellular signal transduction	6.08538	9.66327e-24	2.37201e-21	382018	Unc13a
GO:0006954	inflammatory response	6.51367	1.19429e-23	2.74836e-21	170744	Tlr8
GO:0006954	inflammatory response	6.51367	1.19429e-23	2.74836e-21	383619	Aim2
GO:0006954	inflammatory response	6.51367	1.19429e-23	2.74836e-21	15586	Hyal1
GO:0006954	inflammatory response	6.51367	1.19429e-23	2.74836e-21	18762	Prkcz
GO:0006954	inflammatory response	6.51367	1.19429e-23	2.74836e-21	58861	Cysltr1
GO:0006954	inflammatory response	6.51367	1.19429e-23	2.74836e-21	17951	Naip5
GO:0006954	inflammatory response	6.51367	1.19429e-23	2.74836e-21	20300	Ccl25
GO:0006954	inflammatory response	6.51367	1.19429e-23	2.74836e-21	56644	Clec7a
GO:0006954	inflammatory response	6.51367	1.19429e-23	2.74836e-21	66824	Pycard
GO:0006954	inflammatory response	6.51367	1.19429e-23	2.74836e-21	20201	S100a8
GO:0006954	inflammatory response	6.51367	1.19429e-23	2.74836e-21	12475	Cd14
GO:0006954	inflammatory response	6.51367	1.19429e-23	2.74836e-21	12978	Csf1r
GO:0006954	inflammatory response	6.51367	1.19429e-23	2.74836e-21	21803	Tgfb1
GO:0006954	inflammatory response	6.51367	1.19429e-23	2.74836e-21	18439	P2rx7
GO:0006954	inflammatory response	6.51367	1.19429e-23	2.74836e-21	20302	Ccl3
GO:0006954	inflammatory response	6.51367	1.19429e-23	2.74836e-21	17874	Myd88
GO:0006954	inflammatory response	6.51367	1.19429e-23	2.74836e-21	13601	Ecm1
GO:0006954	inflammatory response	6.51367	1.19429e-23	2.74836e-21	11501	Adam8
GO:0006954	inflammatory response	6.51367	1.19429e-23	2.74836e-21	16889	Lipa
GO:0006954	inflammatory response	6.51367	1.19429e-23	2.74836e-21	54199	Ccrl2
GO:0006954	inflammatory response	6.51367	1.19429e-23	2.74836e-21	170743	Tlr7
GO:0006954	inflammatory response	6.51367	1.19429e-23	2.74836e-21	21825	Thbs1
GO:0006954	inflammatory response	6.51367	1.19429e-23	2.74836e-21	20303	Ccl4
GO:0006954	inflammatory response	6.51367	1.19429e-23	2.74836e-21	17948	Naip2
GO:0006954	inflammatory response	6.51367	1.19429e-23	2.74836e-21	17079	Cd180
GO:0006954	inflammatory response	6.51367	1.19429e-23	2.74836e-21	21897	Tlr1
GO:0006954	inflammatory response	6.51367	1.19429e-23	2.74836e-21	30955	Pik3cg
GO:0006954	inflammatory response	6.51367	1.19429e-23	2.74836e-21	16175	Il1a
GO:0006954	inflammatory response	6.51367	1.19429e-23	2.74836e-21	12768	Ccr1
GO:0006954	inflammatory response	6.51367	1.19429e-23	2.74836e-21	192187	Stab1
GO:0006954	inflammatory response	6.51367	1.19429e-23	2.74836e-21	12655	Chi3l3
GO:0006954	inflammatory response	6.51367	1.19429e-23	2.74836e-21	13610	S1pr3
GO:0006954	inflammatory response	6.51367	1.19429e-23	2.74836e-21	20292	Ccl11
GO:0006954	inflammatory response	6.51367	1.19429e-23	2.74836e-21	21937	Tnfrsf1a
GO:0006954	inflammatory response	6.51367	1.19429e-23	2.74836e-21	19225	Ptgs2
GO:0006954	inflammatory response	6.51367	1.19429e-23	2.74836e-21	18173	Slc11a1
GO:0006954	inflammatory response	6.51367	1.19429e-23	2.74836e-21	279572	Tlr13
GO:0006954	inflammatory response	6.51367	1.19429e-23	2.74836e-21	20202	S100a9
GO:0006954	inflammatory response	6.51367	1.19429e-23	2.74836e-21	21938	Tnfrsf1b
GO:0006954	inflammatory response	6.51367	1.19429e-23	2.74836e-21	17096	Lyn
GO:0006954	inflammatory response	6.51367	1.19429e-23	2.74836e-21	13057	Cyba
GO:0006954	inflammatory response	6.51367	1.19429e-23	2.74836e-21	26362	Axl
GO:0006954	inflammatory response	6.51367	1.19429e-23	2.74836e-21	16176	Il1b
GO:0006954	inflammatory response	6.51367	1.19429e-23	2.74836e-21	17084	Ly86
GO:0006954	inflammatory response	6.51367	1.19429e-23	2.74836e-21	17969	Ncf1
GO:0006954	inflammatory response	6.51367	1.19429e-23	2.74836e-21	24088	Tlr2
GO:0043066	negative regulation of apoptotic process	4.22975	1.25313e-22	2.71413e-20	18762	Prkcz
GO:0043066	negative regulation of apoptotic process	4.22975	1.25313e-22	2.71413e-20	15357	Hmgcr
GO:0043066	negative regulation of apoptotic process	4.22975	1.25313e-22	2.71413e-20	20583	Snai2
GO:0043066	negative regulation of apoptotic process	4.22975	1.25313e-22	2.71413e-20	19099	Mapk8ip1
GO:0043066	negative regulation of apoptotic process	4.22975	1.25313e-22	2.71413e-20	108079	Prkaa2
GO:0043066	negative regulation of apoptotic process	4.22975	1.25313e-22	2.71413e-20	11600	Angpt1
GO:0043066	negative regulation of apoptotic process	4.22975	1.25313e-22	2.71413e-20	74011	Slc25a27
GO:0043066	negative regulation of apoptotic process	4.22975	1.25313e-22	2.71413e-20	105855	Nckap1l
GO:0043066	negative regulation of apoptotic process	4.22975	1.25313e-22	2.71413e-20	60530	Fignl1
GO:0043066	negative regulation of apoptotic process	4.22975	1.25313e-22	2.71413e-20	14451	Gas1
GO:0043066	negative regulation of apoptotic process	4.22975	1.25313e-22	2.71413e-20	15559	Htr2b
GO:0043066	negative regulation of apoptotic process	4.22975	1.25313e-22	2.71413e-20	20723	Serpinb9
GO:0043066	negative regulation of apoptotic process	4.22975	1.25313e-22	2.71413e-20	18793	Plaur
GO:0043066	negative regulation of apoptotic process	4.22975	1.25313e-22	2.71413e-20	52906	Ahi1
GO:0043066	negative regulation of apoptotic process	4.22975	1.25313e-22	2.71413e-20	26362	Axl
GO:0043066	negative regulation of apoptotic process	4.22975	1.25313e-22	2.71413e-20	14775	Gpx1
GO:0043066	negative regulation of apoptotic process	4.22975	1.25313e-22	2.71413e-20	23967	Osr1
GO:0043066	negative regulation of apoptotic process	4.22975	1.25313e-22	2.71413e-20	15234	Hgf
GO:0043066	negative regulation of apoptotic process	4.22975	1.25313e-22	2.71413e-20	12633	Cflar
GO:0043066	negative regulation of apoptotic process	4.22975	1.25313e-22	2.71413e-20	57875	Angptl4
GO:0043066	negative regulation of apoptotic process	4.22975	1.25313e-22	2.71413e-20	23845	Clec5a
GO:0043066	negative regulation of apoptotic process	4.22975	1.25313e-22	2.71413e-20	13649	Egfr
GO:0043066	negative regulation of apoptotic process	4.22975	1.25313e-22	2.71413e-20	78514	Arhgap10
GO:0043066	negative regulation of apoptotic process	4.22975	1.25313e-22	2.71413e-20	11539	Adora1
GO:0043066	negative regulation of apoptotic process	4.22975	1.25313e-22	2.71413e-20	231507	Plac8
GO:0043066	negative regulation of apoptotic process	4.22975	1.25313e-22	2.71413e-20	20527	Slc2a3
GO:0043066	negative regulation of apoptotic process	4.22975	1.25313e-22	2.71413e-20	11486	Ada
GO:0043066	negative regulation of apoptotic process	4.22975	1.25313e-22	2.71413e-20	11629	Aif1
GO:0043066	negative regulation of apoptotic process	4.22975	1.25313e-22	2.71413e-20	16176	Il1b
GO:0043066	negative regulation of apoptotic process	4.22975	1.25313e-22	2.71413e-20	12227	Btg2
GO:0043066	negative regulation of apoptotic process	4.22975	1.25313e-22	2.71413e-20	69807	Trim32
GO:0043066	negative regulation of apoptotic process	4.22975	1.25313e-22	2.71413e-20	15937	Ier3
GO:0043066	negative regulation of apoptotic process	4.22975	1.25313e-22	2.71413e-20	14234	Foxc2
GO:0043066	negative regulation of apoptotic process	4.22975	1.25313e-22	2.71413e-20	21857	Timp1
GO:0043066	negative regulation of apoptotic process	4.22975	1.25313e-22	2.71413e-20	16007	Cyr61
GO:0043066	negative regulation of apoptotic process	4.22975	1.25313e-22	2.71413e-20	18125	Nos1
GO:0043066	negative regulation of apoptotic process	4.22975	1.25313e-22	2.71413e-20	13051	Cx3cr1
GO:0043066	negative regulation of apoptotic process	4.22975	1.25313e-22	2.71413e-20	11799	Birc5
GO:0043066	negative regulation of apoptotic process	4.22975	1.25313e-22	2.71413e-20	20617	Snca
GO:0043066	negative regulation of apoptotic process	4.22975	1.25313e-22	2.71413e-20	12051	Bcl3
GO:0043066	negative regulation of apoptotic process	4.22975	1.25313e-22	2.71413e-20	227737	Fam129b
GO:0043066	negative regulation of apoptotic process	4.22975	1.25313e-22	2.71413e-20	13617	Ednra
GO:0043066	negative regulation of apoptotic process	4.22975	1.25313e-22	2.71413e-20	22228	Ucp2
GO:0043066	negative regulation of apoptotic process	4.22975	1.25313e-22	2.71413e-20	11835	Ar
GO:0043066	negative regulation of apoptotic process	4.22975	1.25313e-22	2.71413e-20	16000	Igf1
GO:0043066	negative regulation of apoptotic process	4.22975	1.25313e-22	2.71413e-20	74754	Dhcr24
GO:0043066	negative regulation of apoptotic process	4.22975	1.25313e-22	2.71413e-20	20750	Spp1
GO:0043066	negative regulation of apoptotic process	4.22975	1.25313e-22	2.71413e-20	12534	Cdk1
GO:0043066	negative regulation of apoptotic process	4.22975	1.25313e-22	2.71413e-20	30955	Pik3cg
GO:0043066	negative regulation of apoptotic process	4.22975	1.25313e-22	2.71413e-20	20312	Cx3cl1
GO:0043066	negative regulation of apoptotic process	4.22975	1.25313e-22	2.71413e-20	16952	Anxa1
GO:0043066	negative regulation of apoptotic process	4.22975	1.25313e-22	2.71413e-20	12505	Cd44
GO:0043066	negative regulation of apoptotic process	4.22975	1.25313e-22	2.71413e-20	13628	Eef1a2
GO:0043066	negative regulation of apoptotic process	4.22975	1.25313e-22	2.71413e-20	14165	Fgf10
GO:0043066	negative regulation of apoptotic process	4.22975	1.25313e-22	2.71413e-20	20393	Sgk1
GO:0043066	negative regulation of apoptotic process	4.22975	1.25313e-22	2.71413e-20	14200	Fhl2
GO:0043066	negative regulation of apoptotic process	4.22975	1.25313e-22	2.71413e-20	18024	Nfe2l2
GO:0043066	negative regulation of apoptotic process	4.22975	1.25313e-22	2.71413e-20	27053	Asns
GO:0043066	negative regulation of apoptotic process	4.22975	1.25313e-22	2.71413e-20	14268	Fn1
GO:0043066	negative regulation of apoptotic process	4.22975	1.25313e-22	2.71413e-20	21825	Thbs1
GO:0043066	negative regulation of apoptotic process	4.22975	1.25313e-22	2.71413e-20	18817	Plk1
GO:0043066	negative regulation of apoptotic process	4.22975	1.25313e-22	2.71413e-20	20254	Scg2
GO:0043066	negative regulation of apoptotic process	4.22975	1.25313e-22	2.71413e-20	21812	Tgfbr1
GO:0043066	negative regulation of apoptotic process	4.22975	1.25313e-22	2.71413e-20	18596	Pdgfrb
GO:0043066	negative regulation of apoptotic process	4.22975	1.25313e-22	2.71413e-20	13132	Dab2
GO:0043066	negative regulation of apoptotic process	4.22975	1.25313e-22	2.71413e-20	14652	Glp1r
GO:0043066	negative regulation of apoptotic process	4.22975	1.25313e-22	2.71413e-20	19229	Ptk2b
GO:0008285	negative regulation of cell proliferation	5.09855	7.87599e-22	1.61108e-19	16176	Il1b
GO:0008285	negative regulation of cell proliferation	5.09855	7.87599e-22	1.61108e-19	21803	Tgfb1
GO:0008285	negative regulation of cell proliferation	5.09855	7.87599e-22	1.61108e-19	17096	Lyn
GO:0008285	negative regulation of cell proliferation	5.09855	7.87599e-22	1.61108e-19	16814	Lbx1
GO:0008285	negative regulation of cell proliferation	5.09855	7.87599e-22	1.61108e-19	12493	Cd37
GO:0008285	negative regulation of cell proliferation	5.09855	7.87599e-22	1.61108e-19	14255	Flt3
GO:0008285	negative regulation of cell proliferation	5.09855	7.87599e-22	1.61108e-19	232441	Rerg
GO:0008285	negative regulation of cell proliferation	5.09855	7.87599e-22	1.61108e-19	54393	Gabbr1
GO:0008285	negative regulation of cell proliferation	5.09855	7.87599e-22	1.61108e-19	11535	Adm
GO:0008285	negative regulation of cell proliferation	5.09855	7.87599e-22	1.61108e-19	230904	Fbxo2
GO:0008285	negative regulation of cell proliferation	5.09855	7.87599e-22	1.61108e-19	14595	B4galt1
GO:0008285	negative regulation of cell proliferation	5.09855	7.87599e-22	1.61108e-19	20556	Slfn2
GO:0008285	negative regulation of cell proliferation	5.09855	7.87599e-22	1.61108e-19	12606	Cebpa
GO:0008285	negative regulation of cell proliferation	5.09855	7.87599e-22	1.61108e-19	18125	Nos1
GO:0008285	negative regulation of cell proliferation	5.09855	7.87599e-22	1.61108e-19	24088	Tlr2
GO:0008285	negative regulation of cell proliferation	5.09855	7.87599e-22	1.61108e-19	64292	Ptges
GO:0008285	negative regulation of cell proliferation	5.09855	7.87599e-22	1.61108e-19	19250	Ptpn14
GO:0008285	negative regulation of cell proliferation	5.09855	7.87599e-22	1.61108e-19	12562	Cdh5
GO:0008285	negative regulation of cell proliferation	5.09855	7.87599e-22	1.61108e-19	19229	Ptk2b
GO:0008285	negative regulation of cell proliferation	5.09855	7.87599e-22	1.61108e-19	242608	Podn
GO:0008285	negative regulation of cell proliferation	5.09855	7.87599e-22	1.61108e-19	12677	Vsx2
GO:0008285	negative regulation of cell proliferation	5.09855	7.87599e-22	1.61108e-19	226830	Smyd2
GO:0008285	negative regulation of cell proliferation	5.09855	7.87599e-22	1.61108e-19	12226	Btg1
GO:0008285	negative regulation of cell proliferation	5.09855	7.87599e-22	1.61108e-19	210530	Leprel1
GO:0008285	negative regulation of cell proliferation	5.09855	7.87599e-22	1.61108e-19	18129	Notch2
GO:0008285	negative regulation of cell proliferation	5.09855	7.87599e-22	1.61108e-19	75607	Wnk2
GO:0008285	negative regulation of cell proliferation	5.09855	7.87599e-22	1.61108e-19	19225	Ptgs2
GO:0008285	negative regulation of cell proliferation	5.09855	7.87599e-22	1.61108e-19	66141	Ifitm3
GO:0008285	negative regulation of cell proliferation	5.09855	7.87599e-22	1.61108e-19	235041	Kank2
GO:0008285	negative regulation of cell proliferation	5.09855	7.87599e-22	1.61108e-19	21813	Tgfbr2
GO:0008285	negative regulation of cell proliferation	5.09855	7.87599e-22	1.61108e-19	27206	Nrk
GO:0008285	negative regulation of cell proliferation	5.09855	7.87599e-22	1.61108e-19	57816	Tesc
GO:0008285	negative regulation of cell proliferation	5.09855	7.87599e-22	1.61108e-19	54353	Skap2
GO:0008285	negative regulation of cell proliferation	5.09855	7.87599e-22	1.61108e-19	16009	Igfbp3
GO:0008285	negative regulation of cell proliferation	5.09855	7.87599e-22	1.61108e-19	11539	Adora1
GO:0008285	negative regulation of cell proliferation	5.09855	7.87599e-22	1.61108e-19	19378	Aldh1a2
GO:0008285	negative regulation of cell proliferation	5.09855	7.87599e-22	1.61108e-19	12227	Btg2
GO:0008285	negative regulation of cell proliferation	5.09855	7.87599e-22	1.61108e-19	16412	Itgb1
GO:0008285	negative regulation of cell proliferation	5.09855	7.87599e-22	1.61108e-19	11688	Alox8
GO:0008285	negative regulation of cell proliferation	5.09855	7.87599e-22	1.61108e-19	13489	Drd2
GO:0008285	negative regulation of cell proliferation	5.09855	7.87599e-22	1.61108e-19	18673	Phb
GO:0008285	negative regulation of cell proliferation	5.09855	7.87599e-22	1.61108e-19	20112	Rps6ka2
GO:0008285	negative regulation of cell proliferation	5.09855	7.87599e-22	1.61108e-19	16000	Igf1
GO:0008285	negative regulation of cell proliferation	5.09855	7.87599e-22	1.61108e-19	14165	Fgf10
GO:0008285	negative regulation of cell proliferation	5.09855	7.87599e-22	1.61108e-19	16175	Il1a
GO:0008285	negative regulation of cell proliferation	5.09855	7.87599e-22	1.61108e-19	74754	Dhcr24
GO:0008285	negative regulation of cell proliferation	5.09855	7.87599e-22	1.61108e-19	12018	Bak1
GO:0008285	negative regulation of cell proliferation	5.09855	7.87599e-22	1.61108e-19	56429	Dpt
GO:0008285	negative regulation of cell proliferation	5.09855	7.87599e-22	1.61108e-19	12160	Bmp5
GO:0008285	negative regulation of cell proliferation	5.09855	7.87599e-22	1.61108e-19	15586	Hyal1
GO:0008285	negative regulation of cell proliferation	5.09855	7.87599e-22	1.61108e-19	12389	Cav1
GO:0008285	negative regulation of cell proliferation	5.09855	7.87599e-22	1.61108e-19	16331	Inpp5d
GO:0008285	negative regulation of cell proliferation	5.09855	7.87599e-22	1.61108e-19	20379	Sfrp4
GO:0043065	positive regulation of apoptotic process	5.52026	6.15452e-21	1.19268e-18	14595	B4galt1
GO:0043065	positive regulation of apoptotic process	5.52026	6.15452e-21	1.19268e-18	12257	Tspo
GO:0043065	positive regulation of apoptotic process	5.52026	6.15452e-21	1.19268e-18	26398	Map2k4
GO:0043065	positive regulation of apoptotic process	5.52026	6.15452e-21	1.19268e-18	22035	Tnfsf10
GO:0043065	positive regulation of apoptotic process	5.52026	6.15452e-21	1.19268e-18	18753	Prkcd
GO:0043065	positive regulation of apoptotic process	5.52026	6.15452e-21	1.19268e-18	14811	Grin2a
GO:0043065	positive regulation of apoptotic process	5.52026	6.15452e-21	1.19268e-18	20379	Sfrp4
GO:0043065	positive regulation of apoptotic process	5.52026	6.15452e-21	1.19268e-18	16331	Inpp5d
GO:0043065	positive regulation of apoptotic process	5.52026	6.15452e-21	1.19268e-18	56338	Txnip
GO:0043065	positive regulation of apoptotic process	5.52026	6.15452e-21	1.19268e-18	16531	Kcnma1
GO:0043065	positive regulation of apoptotic process	5.52026	6.15452e-21	1.19268e-18	12801	Cnr1
GO:0043065	positive regulation of apoptotic process	5.52026	6.15452e-21	1.19268e-18	12018	Bak1
GO:0043065	positive regulation of apoptotic process	5.52026	6.15452e-21	1.19268e-18	19378	Aldh1a2
GO:0043065	positive regulation of apoptotic process	5.52026	6.15452e-21	1.19268e-18	18129	Notch2
GO:0043065	positive regulation of apoptotic process	5.52026	6.15452e-21	1.19268e-18	66824	Pycard
GO:0043065	positive regulation of apoptotic process	5.52026	6.15452e-21	1.19268e-18	16952	Anxa1
GO:0043065	positive regulation of apoptotic process	5.52026	6.15452e-21	1.19268e-18	56772	Mllt11
GO:0043065	positive regulation of apoptotic process	5.52026	6.15452e-21	1.19268e-18	56312	Nupr1
GO:0043065	positive regulation of apoptotic process	5.52026	6.15452e-21	1.19268e-18	77771	Csrnp3
GO:0043065	positive regulation of apoptotic process	5.52026	6.15452e-21	1.19268e-18	19106	Eif2ak2
GO:0043065	positive regulation of apoptotic process	5.52026	6.15452e-21	1.19268e-18	21803	Tgfb1
GO:0043065	positive regulation of apoptotic process	5.52026	6.15452e-21	1.19268e-18	21973	Top2a
GO:0043065	positive regulation of apoptotic process	5.52026	6.15452e-21	1.19268e-18	11535	Adm
GO:0043065	positive regulation of apoptotic process	5.52026	6.15452e-21	1.19268e-18	17390	Mmp2
GO:0043065	positive regulation of apoptotic process	5.52026	6.15452e-21	1.19268e-18	16176	Il1b
GO:0043065	positive regulation of apoptotic process	5.52026	6.15452e-21	1.19268e-18	16007	Cyr61
GO:0043065	positive regulation of apoptotic process	5.52026	6.15452e-21	1.19268e-18	11785	Apbb1
GO:0043065	positive regulation of apoptotic process	5.52026	6.15452e-21	1.19268e-18	15903	Id3
GO:0043065	positive regulation of apoptotic process	5.52026	6.15452e-21	1.19268e-18	64010	Sav1
GO:0043065	positive regulation of apoptotic process	5.52026	6.15452e-21	1.19268e-18	15937	Ier3
GO:0043065	positive regulation of apoptotic process	5.52026	6.15452e-21	1.19268e-18	18439	P2rx7
GO:0043065	positive regulation of apoptotic process	5.52026	6.15452e-21	1.19268e-18	12364	Casp12
GO:0043065	positive regulation of apoptotic process	5.52026	6.15452e-21	1.19268e-18	12424	Cck
GO:0043065	positive regulation of apoptotic process	5.52026	6.15452e-21	1.19268e-18	20112	Rps6ka2
GO:0043065	positive regulation of apoptotic process	5.52026	6.15452e-21	1.19268e-18	26420	Mapk9
GO:0043065	positive regulation of apoptotic process	5.52026	6.15452e-21	1.19268e-18	27056	Irf5
GO:0043065	positive regulation of apoptotic process	5.52026	6.15452e-21	1.19268e-18	72565	Uaca
GO:0043065	positive regulation of apoptotic process	5.52026	6.15452e-21	1.19268e-18	14810	Grin1
GO:0043065	positive regulation of apoptotic process	5.52026	6.15452e-21	1.19268e-18	16009	Igfbp3
GO:0043065	positive regulation of apoptotic process	5.52026	6.15452e-21	1.19268e-18	19264	Ptprc
GO:0043065	positive regulation of apoptotic process	5.52026	6.15452e-21	1.19268e-18	16412	Itgb1
GO:0043065	positive regulation of apoptotic process	5.52026	6.15452e-21	1.19268e-18	19225	Ptgs2
GO:0043065	positive regulation of apoptotic process	5.52026	6.15452e-21	1.19268e-18	12125	Bcl2l11
GO:0043065	positive regulation of apoptotic process	5.52026	6.15452e-21	1.19268e-18	12822	Col18a1
GO:0043065	positive regulation of apoptotic process	5.52026	6.15452e-21	1.19268e-18	12368	Casp6
GO:0043065	positive regulation of apoptotic process	5.52026	6.15452e-21	1.19268e-18	338372	Map3k9
GO:0043065	positive regulation of apoptotic process	5.52026	6.15452e-21	1.19268e-18	19766	Ripk1
GO:0030198	extracellular matrix organization	9.98612	8.15711e-21	1.50172e-18	407800	Ecm2
GO:0030198	extracellular matrix organization	9.98612	8.15711e-21	1.50172e-18	50706	Postn
GO:0030198	extracellular matrix organization	9.98612	8.15711e-21	1.50172e-18	14268	Fn1
GO:0030198	extracellular matrix organization	9.98612	8.15711e-21	1.50172e-18	14595	B4galt1
GO:0030198	extracellular matrix organization	9.98612	8.15711e-21	1.50172e-18	18595	Pdgfra
GO:0030198	extracellular matrix organization	9.98612	8.15711e-21	1.50172e-18	16854	Lgals3
GO:0030198	extracellular matrix organization	9.98612	8.15711e-21	1.50172e-18	94214	Spock2
GO:0030198	extracellular matrix organization	9.98612	8.15711e-21	1.50172e-18	15530	Hspg2
GO:0030198	extracellular matrix organization	9.98612	8.15711e-21	1.50172e-18	23876	Fbln5
GO:0030198	extracellular matrix organization	9.98612	8.15711e-21	1.50172e-18	12051	Bcl3
GO:0030198	extracellular matrix organization	9.98612	8.15711e-21	1.50172e-18	320712	Abi3bp
GO:0030198	extracellular matrix organization	9.98612	8.15711e-21	1.50172e-18	100952	Emilin1
GO:0030198	extracellular matrix organization	9.98612	8.15711e-21	1.50172e-18	64075	Smoc1
GO:0030198	extracellular matrix organization	9.98612	8.15711e-21	1.50172e-18	12822	Col18a1
GO:0030198	extracellular matrix organization	9.98612	8.15711e-21	1.50172e-18	64074	Smoc2
GO:0030198	extracellular matrix organization	9.98612	8.15711e-21	1.50172e-18	241226	Itga8
GO:0030198	extracellular matrix organization	9.98612	8.15711e-21	1.50172e-18	11977	Atp7a
GO:0030198	extracellular matrix organization	9.98612	8.15711e-21	1.50172e-18	18073	Nid1
GO:0030198	extracellular matrix organization	9.98612	8.15711e-21	1.50172e-18	16007	Cyr61
GO:0030198	extracellular matrix organization	9.98612	8.15711e-21	1.50172e-18	11803	Aplp1
GO:0030198	extracellular matrix organization	9.98612	8.15711e-21	1.50172e-18	241327	Olfml2a
GO:0030198	extracellular matrix organization	9.98612	8.15711e-21	1.50172e-18	14114	Fbln1
GO:0030198	extracellular matrix organization	9.98612	8.15711e-21	1.50172e-18	13717	Eln
GO:0030198	extracellular matrix organization	9.98612	8.15711e-21	1.50172e-18	53614	Reck
GO:0030198	extracellular matrix organization	9.98612	8.15711e-21	1.50172e-18	21810	Tgfbi
GO:0030198	extracellular matrix organization	9.98612	8.15711e-21	1.50172e-18	320078	Olfml2b
GO:0030198	extracellular matrix organization	9.98612	8.15711e-21	1.50172e-18	67896	Ccdc80
GO:0030198	extracellular matrix organization	9.98612	8.15711e-21	1.50172e-18	15891	Ibsp
GO:0030198	extracellular matrix organization	9.98612	8.15711e-21	1.50172e-18	11785	Apbb1
GO:0006955	immune response	6.73394	3.18645e-20	5.58692e-18	22324	Vav1
GO:0006955	immune response	6.73394	3.18645e-20	5.58692e-18	21897	Tlr1
GO:0006955	immune response	6.73394	3.18645e-20	5.58692e-18	15064	Mr1
GO:0006955	immune response	6.73394	3.18645e-20	5.58692e-18	16175	Il1a
GO:0006955	immune response	6.73394	3.18645e-20	5.58692e-18	22376	Was
GO:0006955	immune response	6.73394	3.18645e-20	5.58692e-18	20312	Cx3cl1
GO:0006955	immune response	6.73394	3.18645e-20	5.58692e-18	14972	H2-K1
GO:0006955	immune response	6.73394	3.18645e-20	5.58692e-18	20300	Ccl25
GO:0006955	immune response	6.73394	3.18645e-20	5.58692e-18	140792	Colec12
GO:0006955	immune response	6.73394	3.18645e-20	5.58692e-18	20308	Ccl9
GO:0006955	immune response	6.73394	3.18645e-20	5.58692e-18	20723	Serpinb9
GO:0006955	immune response	6.73394	3.18645e-20	5.58692e-18	12504	Cd4
GO:0006955	immune response	6.73394	3.18645e-20	5.58692e-18	20292	Ccl11
GO:0006955	immune response	6.73394	3.18645e-20	5.58692e-18	12768	Ccr1
GO:0006955	immune response	6.73394	3.18645e-20	5.58692e-18	15900	Irf8
GO:0006955	immune response	6.73394	3.18645e-20	5.58692e-18	18606	Enpp2
GO:0006955	immune response	6.73394	3.18645e-20	5.58692e-18	140795	P2ry14
GO:0006955	immune response	6.73394	3.18645e-20	5.58692e-18	170743	Tlr7
GO:0006955	immune response	6.73394	3.18645e-20	5.58692e-18	22035	Tnfsf10
GO:0006955	immune response	6.73394	3.18645e-20	5.58692e-18	12010	B2m
GO:0006955	immune response	6.73394	3.18645e-20	5.58692e-18	14960	H2-Aa
GO:0006955	immune response	6.73394	3.18645e-20	5.58692e-18	20303	Ccl4
GO:0006955	immune response	6.73394	3.18645e-20	5.58692e-18	23962	Oasl2
GO:0006955	immune response	6.73394	3.18645e-20	5.58692e-18	16176	Il1b
GO:0006955	immune response	6.73394	3.18645e-20	5.58692e-18	17874	Myd88
GO:0006955	immune response	6.73394	3.18645e-20	5.58692e-18	18387	Oprk1
GO:0006955	immune response	6.73394	3.18645e-20	5.58692e-18	14961	H2-Ab1
GO:0006955	immune response	6.73394	3.18645e-20	5.58692e-18	20305	Ccl6
GO:0006955	immune response	6.73394	3.18645e-20	5.58692e-18	21938	Tnfrsf1b
GO:0006955	immune response	6.73394	3.18645e-20	5.58692e-18	14130	Fcgr2b
GO:0006955	immune response	6.73394	3.18645e-20	5.58692e-18	69583	Tnfsf13
GO:0006955	immune response	6.73394	3.18645e-20	5.58692e-18	15216	Hfe
GO:0006955	immune response	6.73394	3.18645e-20	5.58692e-18	20302	Ccl3
GO:0006955	immune response	6.73394	3.18645e-20	5.58692e-18	21944	Tnfsf12
GO:0006955	immune response	6.73394	3.18645e-20	5.58692e-18	14132	Fcgrt
GO:0006955	immune response	6.73394	3.18645e-20	5.58692e-18	56619	Clec4e
GO:0006955	immune response	6.73394	3.18645e-20	5.58692e-18	24088	Tlr2
GO:0006955	immune response	6.73394	3.18645e-20	5.58692e-18	71733	Susd2
GO:0042391	regulation of membrane potential	11.837	3.65889e-20	6.12365e-18	12300	Cacng2
GO:0042391	regulation of membrane potential	11.837	3.65889e-20	6.12365e-18	116838	Rims2
GO:0042391	regulation of membrane potential	11.837	3.65889e-20	6.12365e-18	14811	Grin2a
GO:0042391	regulation of membrane potential	11.837	3.65889e-20	6.12365e-18	20513	Slc1a6
GO:0042391	regulation of membrane potential	11.837	3.65889e-20	6.12365e-18	15166	Hcn2
GO:0042391	regulation of membrane potential	11.837	3.65889e-20	6.12365e-18	116837	Rims1
GO:0042391	regulation of membrane potential	11.837	3.65889e-20	6.12365e-18	16514	Kcnj11
GO:0042391	regulation of membrane potential	11.837	3.65889e-20	6.12365e-18	12794	Cnih2
GO:0042391	regulation of membrane potential	11.837	3.65889e-20	6.12365e-18	242662	Rims3
GO:0042391	regulation of membrane potential	11.837	3.65889e-20	6.12365e-18	18217	Ntsr2
GO:0042391	regulation of membrane potential	11.837	3.65889e-20	6.12365e-18	20265	Scn1a
GO:0042391	regulation of membrane potential	11.837	3.65889e-20	6.12365e-18	12298	Cacnb4
GO:0042391	regulation of membrane potential	11.837	3.65889e-20	6.12365e-18	14810	Grin1
GO:0042391	regulation of membrane potential	11.837	3.65889e-20	6.12365e-18	14654	Glra1
GO:0042391	regulation of membrane potential	11.837	3.65889e-20	6.12365e-18	11438	Chrna4
GO:0042391	regulation of membrane potential	11.837	3.65889e-20	6.12365e-18	14806	Grik2
GO:0042391	regulation of membrane potential	11.837	3.65889e-20	6.12365e-18	11444	Chrnb2
GO:0042391	regulation of membrane potential	11.837	3.65889e-20	6.12365e-18	16531	Kcnma1
GO:0042391	regulation of membrane potential	11.837	3.65889e-20	6.12365e-18	11441	Chrna7
GO:0042391	regulation of membrane potential	11.837	3.65889e-20	6.12365e-18	72978	Cnih3
GO:0042391	regulation of membrane potential	11.837	3.65889e-20	6.12365e-18	13483	Dpp6
GO:0042391	regulation of membrane potential	11.837	3.65889e-20	6.12365e-18	58869	Pex5l
GO:0042391	regulation of membrane potential	11.837	3.65889e-20	6.12365e-18	14805	Grik1
GO:0042391	regulation of membrane potential	11.837	3.65889e-20	6.12365e-18	14658	Glrb
GO:0042391	regulation of membrane potential	11.837	3.65889e-20	6.12365e-18	16511	Kcnh2
GO:0007275	multicellular organismal development	2.95404	1.01719e-19	1.6252e-17	18187	Nrp2
GO:0007275	multicellular organismal development	2.95404	1.01719e-19	1.6252e-17	99512	Wdr47
GO:0007275	multicellular organismal development	2.95404	1.01719e-19	1.6252e-17	11517	Adcyap1r1
GO:0007275	multicellular organismal development	2.95404	1.01719e-19	1.6252e-17	14164	Fgf1
GO:0007275	multicellular organismal development	2.95404	1.01719e-19	1.6252e-17	13131	Dab1
GO:0007275	multicellular organismal development	2.95404	1.01719e-19	1.6252e-17	65960	Twsg1
GO:0007275	multicellular organismal development	2.95404	1.01719e-19	1.6252e-17	15571	Elavl3
GO:0007275	multicellular organismal development	2.95404	1.01719e-19	1.6252e-17	30959	Ddx25
GO:0007275	multicellular organismal development	2.95404	1.01719e-19	1.6252e-17	12822	Col18a1
GO:0007275	multicellular organismal development	2.95404	1.01719e-19	1.6252e-17	16419	Itgb5
GO:0007275	multicellular organismal development	2.95404	1.01719e-19	1.6252e-17	23937	Mab21l2
GO:0007275	multicellular organismal development	2.95404	1.01719e-19	1.6252e-17	18933	Prrx1
GO:0007275	multicellular organismal development	2.95404	1.01719e-19	1.6252e-17	13649	Egfr
GO:0007275	multicellular organismal development	2.95404	1.01719e-19	1.6252e-17	58223	Mmp19
GO:0007275	multicellular organismal development	2.95404	1.01719e-19	1.6252e-17	18481	Pak3
GO:0007275	multicellular organismal development	2.95404	1.01719e-19	1.6252e-17	12946	Cr1l
GO:0007275	multicellular organismal development	2.95404	1.01719e-19	1.6252e-17	18213	Ntrk3
GO:0007275	multicellular organismal development	2.95404	1.01719e-19	1.6252e-17	66573	Dzip1
GO:0007275	multicellular organismal development	2.95404	1.01719e-19	1.6252e-17	18129	Notch2
GO:0007275	multicellular organismal development	2.95404	1.01719e-19	1.6252e-17	18596	Pdgfrb
GO:0007275	multicellular organismal development	2.95404	1.01719e-19	1.6252e-17	12325	Camk2g
GO:0007275	multicellular organismal development	2.95404	1.01719e-19	1.6252e-17	15903	Id3
GO:0007275	multicellular organismal development	2.95404	1.01719e-19	1.6252e-17	210801	Unc5d
GO:0007275	multicellular organismal development	2.95404	1.01719e-19	1.6252e-17	12704	Cit
GO:0007275	multicellular organismal development	2.95404	1.01719e-19	1.6252e-17	17536	Meis2
GO:0007275	multicellular organismal development	2.95404	1.01719e-19	1.6252e-17	67784	Plxnd1
GO:0007275	multicellular organismal development	2.95404	1.01719e-19	1.6252e-17	229715	Amigo1
GO:0007275	multicellular organismal development	2.95404	1.01719e-19	1.6252e-17	52822	Rufy3
GO:0007275	multicellular organismal development	2.95404	1.01719e-19	1.6252e-17	23882	Gadd45g
GO:0007275	multicellular organismal development	2.95404	1.01719e-19	1.6252e-17	20562	Slit1
GO:0007275	multicellular organismal development	2.95404	1.01719e-19	1.6252e-17	15413	Hoxb5
GO:0007275	multicellular organismal development	2.95404	1.01719e-19	1.6252e-17	12160	Bmp5
GO:0007275	multicellular organismal development	2.95404	1.01719e-19	1.6252e-17	64075	Smoc1
GO:0007275	multicellular organismal development	2.95404	1.01719e-19	1.6252e-17	20204	Prrx2
GO:0007275	multicellular organismal development	2.95404	1.01719e-19	1.6252e-17	320460	Vwc2l
GO:0007275	multicellular organismal development	2.95404	1.01719e-19	1.6252e-17	107448	Unc5a
GO:0007275	multicellular organismal development	2.95404	1.01719e-19	1.6252e-17	20358	Sema6a
GO:0007275	multicellular organismal development	2.95404	1.01719e-19	1.6252e-17	17116	Mab21l1
GO:0007275	multicellular organismal development	2.95404	1.01719e-19	1.6252e-17	227325	Dner
GO:0007275	multicellular organismal development	2.95404	1.01719e-19	1.6252e-17	13593	Ebf3
GO:0007275	multicellular organismal development	2.95404	1.01719e-19	1.6252e-17	15417	Hoxb9
GO:0007275	multicellular organismal development	2.95404	1.01719e-19	1.6252e-17	14726	Pdpn
GO:0007275	multicellular organismal development	2.95404	1.01719e-19	1.6252e-17	59036	Dact1
GO:0007275	multicellular organismal development	2.95404	1.01719e-19	1.6252e-17	268902	Robo2
GO:0007275	multicellular organismal development	2.95404	1.01719e-19	1.6252e-17	15242	Hhex
GO:0007275	multicellular organismal development	2.95404	1.01719e-19	1.6252e-17	20744	Strbp
GO:0007275	multicellular organismal development	2.95404	1.01719e-19	1.6252e-17	18186	Nrp1
GO:0007275	multicellular organismal development	2.95404	1.01719e-19	1.6252e-17	18595	Pdgfra
GO:0007275	multicellular organismal development	2.95404	1.01719e-19	1.6252e-17	22772	Zic2
GO:0007275	multicellular organismal development	2.95404	1.01719e-19	1.6252e-17	83675	Bicc1
GO:0007275	multicellular organismal development	2.95404	1.01719e-19	1.6252e-17	54712	Plxnc1
GO:0007275	multicellular organismal development	2.95404	1.01719e-19	1.6252e-17	20583	Snai2
GO:0007275	multicellular organismal development	2.95404	1.01719e-19	1.6252e-17	16814	Lbx1
GO:0007275	multicellular organismal development	2.95404	1.01719e-19	1.6252e-17	15416	Hoxb8
GO:0007275	multicellular organismal development	2.95404	1.01719e-19	1.6252e-17	14234	Foxc2
GO:0007275	multicellular organismal development	2.95404	1.01719e-19	1.6252e-17	225998	Rorb
GO:0007275	multicellular organismal development	2.95404	1.01719e-19	1.6252e-17	20660	Sorl1
GO:0007275	multicellular organismal development	2.95404	1.01719e-19	1.6252e-17	108151	Sema3d
GO:0007275	multicellular organismal development	2.95404	1.01719e-19	1.6252e-17	93960	Nkd1
GO:0007275	multicellular organismal development	2.95404	1.01719e-19	1.6252e-17	20191	Ryr2
GO:0007275	multicellular organismal development	2.95404	1.01719e-19	1.6252e-17	245527	Eda2r
GO:0007275	multicellular organismal development	2.95404	1.01719e-19	1.6252e-17	68151	Wls
GO:0007275	multicellular organismal development	2.95404	1.01719e-19	1.6252e-17	17313	Mgp
GO:0007275	multicellular organismal development	2.95404	1.01719e-19	1.6252e-17	16414	Itgb2
GO:0007275	multicellular organismal development	2.95404	1.01719e-19	1.6252e-17	12677	Vsx2
GO:0007275	multicellular organismal development	2.95404	1.01719e-19	1.6252e-17	140570	Plxnb2
GO:0007275	multicellular organismal development	2.95404	1.01719e-19	1.6252e-17	241226	Itga8
GO:0007275	multicellular organismal development	2.95404	1.01719e-19	1.6252e-17	54418	Fmn2
GO:0007275	multicellular organismal development	2.95404	1.01719e-19	1.6252e-17	11601	Angpt2
GO:0007275	multicellular organismal development	2.95404	1.01719e-19	1.6252e-17	17933	Myt1l
GO:0007275	multicellular organismal development	2.95404	1.01719e-19	1.6252e-17	13800	Enah
GO:0007275	multicellular organismal development	2.95404	1.01719e-19	1.6252e-17	13176	Dcc
GO:0007275	multicellular organismal development	2.95404	1.01719e-19	1.6252e-17	17295	Met
GO:0007275	multicellular organismal development	2.95404	1.01719e-19	1.6252e-17	16412	Itgb1
GO:0007275	multicellular organismal development	2.95404	1.01719e-19	1.6252e-17	17286	Meox2
GO:0007275	multicellular organismal development	2.95404	1.01719e-19	1.6252e-17	13008	Csrp2
GO:0007275	multicellular organismal development	2.95404	1.01719e-19	1.6252e-17	14180	Fgf9
GO:0007275	multicellular organismal development	2.95404	1.01719e-19	1.6252e-17	16790	Anpep
GO:0007275	multicellular organismal development	2.95404	1.01719e-19	1.6252e-17	19716	Bex1
GO:0007275	multicellular organismal development	2.95404	1.01719e-19	1.6252e-17	13132	Dab2
GO:0007275	multicellular organismal development	2.95404	1.01719e-19	1.6252e-17	69605	Lnp
GO:0007275	multicellular organismal development	2.95404	1.01719e-19	1.6252e-17	21944	Tnfsf12
GO:0007275	multicellular organismal development	2.95404	1.01719e-19	1.6252e-17	11838	Arc
GO:0007275	multicellular organismal development	2.95404	1.01719e-19	1.6252e-17	20379	Sfrp4
GO:0007275	multicellular organismal development	2.95404	1.01719e-19	1.6252e-17	13423	Dnase2a
GO:0007275	multicellular organismal development	2.95404	1.01719e-19	1.6252e-17	99543	Olfml3
GO:0007275	multicellular organismal development	2.95404	1.01719e-19	1.6252e-17	54635	Pdgfc
GO:0007275	multicellular organismal development	2.95404	1.01719e-19	1.6252e-17	11600	Angpt1
GO:0007275	multicellular organismal development	2.95404	1.01719e-19	1.6252e-17	12745	Clgn
GO:0007275	multicellular organismal development	2.95404	1.01719e-19	1.6252e-17	13643	Efnb3
GO:0007275	multicellular organismal development	2.95404	1.01719e-19	1.6252e-17	22778	Ikzf1
GO:0007275	multicellular organismal development	2.95404	1.01719e-19	1.6252e-17	226180	Ina
GO:0007275	multicellular organismal development	2.95404	1.01719e-19	1.6252e-17	243743	Plxna4
GO:0030335	positive regulation of cell migration	7.75186	1.05934e-19	1.6252e-17	16007	Cyr61
GO:0030335	positive regulation of cell migration	7.75186	1.05934e-19	1.6252e-17	13649	Egfr
GO:0030335	positive regulation of cell migration	7.75186	1.05934e-19	1.6252e-17	16412	Itgb1
GO:0030335	positive regulation of cell migration	7.75186	1.05934e-19	1.6252e-17	17390	Mmp2
GO:0030335	positive regulation of cell migration	7.75186	1.05934e-19	1.6252e-17	16777	Lamb1
GO:0030335	positive regulation of cell migration	7.75186	1.05934e-19	1.6252e-17	20312	Cx3cl1
GO:0030335	positive regulation of cell migration	7.75186	1.05934e-19	1.6252e-17	20292	Ccl11
GO:0030335	positive regulation of cell migration	7.75186	1.05934e-19	1.6252e-17	13132	Dab2
GO:0030335	positive regulation of cell migration	7.75186	1.05934e-19	1.6252e-17	18595	Pdgfra
GO:0030335	positive regulation of cell migration	7.75186	1.05934e-19	1.6252e-17	69807	Trim32
GO:0030335	positive regulation of cell migration	7.75186	1.05934e-19	1.6252e-17	20583	Snai2
GO:0030335	positive regulation of cell migration	7.75186	1.05934e-19	1.6252e-17	11629	Aif1
GO:0030335	positive regulation of cell migration	7.75186	1.05934e-19	1.6252e-17	18550	Furin
GO:0030335	positive regulation of cell migration	7.75186	1.05934e-19	1.6252e-17	17913	Myo1c
GO:0030335	positive regulation of cell migration	7.75186	1.05934e-19	1.6252e-17	17916	Myo1f
GO:0030335	positive regulation of cell migration	7.75186	1.05934e-19	1.6252e-17	21803	Tgfb1
GO:0030335	positive regulation of cell migration	7.75186	1.05934e-19	1.6252e-17	14164	Fgf1
GO:0030335	positive regulation of cell migration	7.75186	1.05934e-19	1.6252e-17	14268	Fn1
GO:0030335	positive regulation of cell migration	7.75186	1.05934e-19	1.6252e-17	18213	Ntrk3
GO:0030335	positive regulation of cell migration	7.75186	1.05934e-19	1.6252e-17	12267	C3ar1
GO:0030335	positive regulation of cell migration	7.75186	1.05934e-19	1.6252e-17	14726	Pdpn
GO:0030335	positive regulation of cell migration	7.75186	1.05934e-19	1.6252e-17	66102	Cxcl16
GO:0030335	positive regulation of cell migration	7.75186	1.05934e-19	1.6252e-17	17096	Lyn
GO:0030335	positive regulation of cell migration	7.75186	1.05934e-19	1.6252e-17	15234	Hgf
GO:0030335	positive regulation of cell migration	7.75186	1.05934e-19	1.6252e-17	12842	Col1a1
GO:0030335	positive regulation of cell migration	7.75186	1.05934e-19	1.6252e-17	19229	Ptk2b
GO:0030335	positive regulation of cell migration	7.75186	1.05934e-19	1.6252e-17	12978	Csf1r
GO:0030335	positive regulation of cell migration	7.75186	1.05934e-19	1.6252e-17	18596	Pdgfrb
GO:0030335	positive regulation of cell migration	7.75186	1.05934e-19	1.6252e-17	12721	Coro1a
GO:0030335	positive regulation of cell migration	7.75186	1.05934e-19	1.6252e-17	17387	Mmp14
GO:0030335	positive regulation of cell migration	7.75186	1.05934e-19	1.6252e-17	107589	Mylk
GO:0030335	positive regulation of cell migration	7.75186	1.05934e-19	1.6252e-17	12822	Col18a1
GO:0030335	positive regulation of cell migration	7.75186	1.05934e-19	1.6252e-17	21825	Thbs1
GO:0008284	positive regulation of cell proliferation	4.36296	2.37703e-19	3.50088e-17	14164	Fgf1
GO:0008284	positive regulation of cell proliferation	4.36296	2.37703e-19	3.50088e-17	21803	Tgfb1
GO:0008284	positive regulation of cell proliferation	4.36296	2.37703e-19	3.50088e-17	12677	Vsx2
GO:0008284	positive regulation of cell proliferation	4.36296	2.37703e-19	3.50088e-17	11441	Chrna7
GO:0008284	positive regulation of cell proliferation	4.36296	2.37703e-19	3.50088e-17	11910	Atf3
GO:0008284	positive regulation of cell proliferation	4.36296	2.37703e-19	3.50088e-17	11535	Adm
GO:0008284	positive regulation of cell proliferation	4.36296	2.37703e-19	3.50088e-17	66049	Rogdi
GO:0008284	positive regulation of cell proliferation	4.36296	2.37703e-19	3.50088e-17	19229	Ptk2b
GO:0008284	positive regulation of cell proliferation	4.36296	2.37703e-19	3.50088e-17	13617	Ednra
GO:0008284	positive regulation of cell proliferation	4.36296	2.37703e-19	3.50088e-17	23937	Mab21l2
GO:0008284	positive regulation of cell proliferation	4.36296	2.37703e-19	3.50088e-17	17116	Mab21l1
GO:0008284	positive regulation of cell proliferation	4.36296	2.37703e-19	3.50088e-17	19354	Rac2
GO:0008284	positive regulation of cell proliferation	4.36296	2.37703e-19	3.50088e-17	16412	Itgb1
GO:0008284	positive regulation of cell proliferation	4.36296	2.37703e-19	3.50088e-17	18792	Plau
GO:0008284	positive regulation of cell proliferation	4.36296	2.37703e-19	3.50088e-17	18213	Ntrk3
GO:0008284	positive regulation of cell proliferation	4.36296	2.37703e-19	3.50088e-17	231507	Plac8
GO:0008284	positive regulation of cell proliferation	4.36296	2.37703e-19	3.50088e-17	208691	Eif5a2
GO:0008284	positive regulation of cell proliferation	4.36296	2.37703e-19	3.50088e-17	12566	Cdk2
GO:0008284	positive regulation of cell proliferation	4.36296	2.37703e-19	3.50088e-17	18595	Pdgfra
GO:0008284	positive regulation of cell proliferation	4.36296	2.37703e-19	3.50088e-17	14165	Fgf10
GO:0008284	positive regulation of cell proliferation	4.36296	2.37703e-19	3.50088e-17	19378	Aldh1a2
GO:0008284	positive regulation of cell proliferation	4.36296	2.37703e-19	3.50088e-17	18214	Ddr2
GO:0008284	positive regulation of cell proliferation	4.36296	2.37703e-19	3.50088e-17	15559	Htr2b
GO:0008284	positive regulation of cell proliferation	4.36296	2.37703e-19	3.50088e-17	12822	Col18a1
GO:0008284	positive regulation of cell proliferation	4.36296	2.37703e-19	3.50088e-17	16000	Igf1
GO:0008284	positive regulation of cell proliferation	4.36296	2.37703e-19	3.50088e-17	14652	Glp1r
GO:0008284	positive regulation of cell proliferation	4.36296	2.37703e-19	3.50088e-17	12978	Csf1r
GO:0008284	positive regulation of cell proliferation	4.36296	2.37703e-19	3.50088e-17	217946	Cdca7l
GO:0008284	positive regulation of cell proliferation	4.36296	2.37703e-19	3.50088e-17	54635	Pdgfc
GO:0008284	positive regulation of cell proliferation	4.36296	2.37703e-19	3.50088e-17	14451	Gas1
GO:0008284	positive regulation of cell proliferation	4.36296	2.37703e-19	3.50088e-17	15163	Hcls1
GO:0008284	positive regulation of cell proliferation	4.36296	2.37703e-19	3.50088e-17	18762	Prkcz
GO:0008284	positive regulation of cell proliferation	4.36296	2.37703e-19	3.50088e-17	17869	Myc
GO:0008284	positive regulation of cell proliferation	4.36296	2.37703e-19	3.50088e-17	19225	Ptgs2
GO:0008284	positive regulation of cell proliferation	4.36296	2.37703e-19	3.50088e-17	11835	Ar
GO:0008284	positive regulation of cell proliferation	4.36296	2.37703e-19	3.50088e-17	70445	Cd248
GO:0008284	positive regulation of cell proliferation	4.36296	2.37703e-19	3.50088e-17	69583	Tnfsf13
GO:0008284	positive regulation of cell proliferation	4.36296	2.37703e-19	3.50088e-17	13649	Egfr
GO:0008284	positive regulation of cell proliferation	4.36296	2.37703e-19	3.50088e-17	21923	Tnc
GO:0008284	positive regulation of cell proliferation	4.36296	2.37703e-19	3.50088e-17	12804	Cntfr
GO:0008284	positive regulation of cell proliferation	4.36296	2.37703e-19	3.50088e-17	12426	Cckbr
GO:0008284	positive regulation of cell proliferation	4.36296	2.37703e-19	3.50088e-17	14180	Fgf9
GO:0008284	positive regulation of cell proliferation	4.36296	2.37703e-19	3.50088e-17	20256	Clec11a
GO:0008284	positive regulation of cell proliferation	4.36296	2.37703e-19	3.50088e-17	74011	Slc25a27
GO:0008284	positive regulation of cell proliferation	4.36296	2.37703e-19	3.50088e-17	15558	Htr2a
GO:0008284	positive regulation of cell proliferation	4.36296	2.37703e-19	3.50088e-17	12424	Cck
GO:0008284	positive regulation of cell proliferation	4.36296	2.37703e-19	3.50088e-17	97064	Wwtr1
GO:0008284	positive regulation of cell proliferation	4.36296	2.37703e-19	3.50088e-17	21812	Tgfbr1
GO:0008284	positive regulation of cell proliferation	4.36296	2.37703e-19	3.50088e-17	18414	Osmr
GO:0008284	positive regulation of cell proliferation	4.36296	2.37703e-19	3.50088e-17	18596	Pdgfrb
GO:0008284	positive regulation of cell proliferation	4.36296	2.37703e-19	3.50088e-17	13482	Dpp4
GO:0008284	positive regulation of cell proliferation	4.36296	2.37703e-19	3.50088e-17	15357	Hmgcr
GO:0008284	positive regulation of cell proliferation	4.36296	2.37703e-19	3.50088e-17	17096	Lyn
GO:0008284	positive regulation of cell proliferation	4.36296	2.37703e-19	3.50088e-17	20449	St8sia1
GO:0008284	positive regulation of cell proliferation	4.36296	2.37703e-19	3.50088e-17	15170	Ptpn6
GO:0001525	angiogenesis	6.09261	1.26749e-18	1.79496e-16	18187	Nrp2
GO:0001525	angiogenesis	6.09261	1.26749e-18	1.79496e-16	11601	Angpt2
GO:0001525	angiogenesis	6.09261	1.26749e-18	1.79496e-16	12837	Col8a1
GO:0001525	angiogenesis	6.09261	1.26749e-18	1.79496e-16	12224	Klf5
GO:0001525	angiogenesis	6.09261	1.26749e-18	1.79496e-16	16790	Anpep
GO:0001525	angiogenesis	6.09261	1.26749e-18	1.79496e-16	18792	Plau
GO:0001525	angiogenesis	6.09261	1.26749e-18	1.79496e-16	12370	Casp8
GO:0001525	angiogenesis	6.09261	1.26749e-18	1.79496e-16	14164	Fgf1
GO:0001525	angiogenesis	6.09261	1.26749e-18	1.79496e-16	329941	Col8a2
GO:0001525	angiogenesis	6.09261	1.26749e-18	1.79496e-16	19225	Ptgs2
GO:0001525	angiogenesis	6.09261	1.26749e-18	1.79496e-16	12822	Col18a1
GO:0001525	angiogenesis	6.09261	1.26749e-18	1.79496e-16	20963	Syk
GO:0001525	angiogenesis	6.09261	1.26749e-18	1.79496e-16	58223	Mmp19
GO:0001525	angiogenesis	6.09261	1.26749e-18	1.79496e-16	13078	Cyp1b1
GO:0001525	angiogenesis	6.09261	1.26749e-18	1.79496e-16	67784	Plxnd1
GO:0001525	angiogenesis	6.09261	1.26749e-18	1.79496e-16	17286	Meox2
GO:0001525	angiogenesis	6.09261	1.26749e-18	1.79496e-16	12306	Anxa2
GO:0001525	angiogenesis	6.09261	1.26749e-18	1.79496e-16	19229	Ptk2b
GO:0001525	angiogenesis	6.09261	1.26749e-18	1.79496e-16	17390	Mmp2
GO:0001525	angiogenesis	6.09261	1.26749e-18	1.79496e-16	18186	Nrp1
GO:0001525	angiogenesis	6.09261	1.26749e-18	1.79496e-16	30955	Pik3cg
GO:0001525	angiogenesis	6.09261	1.26749e-18	1.79496e-16	270190	Ephb1
GO:0001525	angiogenesis	6.09261	1.26749e-18	1.79496e-16	13601	Ecm1
GO:0001525	angiogenesis	6.09261	1.26749e-18	1.79496e-16	16847	Lepr
GO:0001525	angiogenesis	6.09261	1.26749e-18	1.79496e-16	11501	Adam8
GO:0001525	angiogenesis	6.09261	1.26749e-18	1.79496e-16	12826	Col4a1
GO:0001525	angiogenesis	6.09261	1.26749e-18	1.79496e-16	11600	Angpt1
GO:0001525	angiogenesis	6.09261	1.26749e-18	1.79496e-16	12389	Cav1
GO:0001525	angiogenesis	6.09261	1.26749e-18	1.79496e-16	12827	Col4a2
GO:0001525	angiogenesis	6.09261	1.26749e-18	1.79496e-16	14268	Fn1
GO:0001525	angiogenesis	6.09261	1.26749e-18	1.79496e-16	17886	Myh9
GO:0001525	angiogenesis	6.09261	1.26749e-18	1.79496e-16	21812	Tgfbr1
GO:0001525	angiogenesis	6.09261	1.26749e-18	1.79496e-16	15530	Hspg2
GO:0001525	angiogenesis	6.09261	1.26749e-18	1.79496e-16	13713	Elk3
GO:0001525	angiogenesis	6.09261	1.26749e-18	1.79496e-16	20254	Scg2
GO:0001525	angiogenesis	6.09261	1.26749e-18	1.79496e-16	14180	Fgf9
GO:0001525	angiogenesis	6.09261	1.26749e-18	1.79496e-16	20416	Shc1
GO:0001525	angiogenesis	6.09261	1.26749e-18	1.79496e-16	21944	Tnfsf12
GO:0055114	oxidation-reduction process	3.21913	4.14637e-18	5.65442e-16	73166	Tm7sf2
GO:0055114	oxidation-reduction process	3.21913	4.14637e-18	5.65442e-16	109232	Sccpdh
GO:0055114	oxidation-reduction process	3.21913	4.14637e-18	5.65442e-16	14104	Fasn
GO:0055114	oxidation-reduction process	3.21913	4.14637e-18	5.65442e-16	11690	Alox5ap
GO:0055114	oxidation-reduction process	3.21913	4.14637e-18	5.65442e-16	72168	Aifm3
GO:0055114	oxidation-reduction process	3.21913	4.14637e-18	5.65442e-16	16949	Loxl1
GO:0055114	oxidation-reduction process	3.21913	4.14637e-18	5.65442e-16	68631	Cryl1
GO:0055114	oxidation-reduction process	3.21913	4.14637e-18	5.65442e-16	338521	Fa2h
GO:0055114	oxidation-reduction process	3.21913	4.14637e-18	5.65442e-16	98711	Rdh10
GO:0055114	oxidation-reduction process	3.21913	4.14637e-18	5.65442e-16	52585	Dhrs1
GO:0055114	oxidation-reduction process	3.21913	4.14637e-18	5.65442e-16	14261	Fmo1
GO:0055114	oxidation-reduction process	3.21913	4.14637e-18	5.65442e-16	106529	Tecr
GO:0055114	oxidation-reduction process	3.21913	4.14637e-18	5.65442e-16	14778	Gpx3
GO:0055114	oxidation-reduction process	3.21913	4.14637e-18	5.65442e-16	20775	Sqle
GO:0055114	oxidation-reduction process	3.21913	4.14637e-18	5.65442e-16	20249	Scd1
GO:0055114	oxidation-reduction process	3.21913	4.14637e-18	5.65442e-16	15357	Hmgcr
GO:0055114	oxidation-reduction process	3.21913	4.14637e-18	5.65442e-16	68428	Steap3
GO:0055114	oxidation-reduction process	3.21913	4.14637e-18	5.65442e-16	18453	P4hb
GO:0055114	oxidation-reduction process	3.21913	4.14637e-18	5.65442e-16	235293	Sc5d
GO:0055114	oxidation-reduction process	3.21913	4.14637e-18	5.65442e-16	20321	Frrs1
GO:0055114	oxidation-reduction process	3.21913	4.14637e-18	5.65442e-16	13078	Cyp1b1
GO:0055114	oxidation-reduction process	3.21913	4.14637e-18	5.65442e-16	14187	Akr1b8
GO:0055114	oxidation-reduction process	3.21913	4.14637e-18	5.65442e-16	22166	Txn1
GO:0055114	oxidation-reduction process	3.21913	4.14637e-18	5.65442e-16	66447	Mgst3
GO:0055114	oxidation-reduction process	3.21913	4.14637e-18	5.65442e-16	26949	Vat1
GO:0055114	oxidation-reduction process	3.21913	4.14637e-18	5.65442e-16	56615	Mgst1
GO:0055114	oxidation-reduction process	3.21913	4.14637e-18	5.65442e-16	53381	Prdx4
GO:0055114	oxidation-reduction process	3.21913	4.14637e-18	5.65442e-16	19378	Aldh1a2
GO:0055114	oxidation-reduction process	3.21913	4.14637e-18	5.65442e-16	14775	Gpx1
GO:0055114	oxidation-reduction process	3.21913	4.14637e-18	5.65442e-16	11522	Adh1
GO:0055114	oxidation-reduction process	3.21913	4.14637e-18	5.65442e-16	30049	Scd3
GO:0055114	oxidation-reduction process	3.21913	4.14637e-18	5.65442e-16	11688	Alox8
GO:0055114	oxidation-reduction process	3.21913	4.14637e-18	5.65442e-16	11754	Aoc3
GO:0055114	oxidation-reduction process	3.21913	4.14637e-18	5.65442e-16	263764	Creg2
GO:0055114	oxidation-reduction process	3.21913	4.14637e-18	5.65442e-16	211488	Ado
GO:0055114	oxidation-reduction process	3.21913	4.14637e-18	5.65442e-16	109264	Me3
GO:0055114	oxidation-reduction process	3.21913	4.14637e-18	5.65442e-16	105245	Txndc5
GO:0055114	oxidation-reduction process	3.21913	4.14637e-18	5.65442e-16	74754	Dhcr24
GO:0055114	oxidation-reduction process	3.21913	4.14637e-18	5.65442e-16	59012	Moxd1
GO:0055114	oxidation-reduction process	3.21913	4.14637e-18	5.65442e-16	20617	Snca
GO:0055114	oxidation-reduction process	3.21913	4.14637e-18	5.65442e-16	13058	Cybb
GO:0055114	oxidation-reduction process	3.21913	4.14637e-18	5.65442e-16	66234	Sc4mol
GO:0055114	oxidation-reduction process	3.21913	4.14637e-18	5.65442e-16	65972	Ifi30
GO:0055114	oxidation-reduction process	3.21913	4.14637e-18	5.65442e-16	67103	Ptgr1
GO:0055114	oxidation-reduction process	3.21913	4.14637e-18	5.65442e-16	13056	Cyb561
GO:0055114	oxidation-reduction process	3.21913	4.14637e-18	5.65442e-16	13057	Cyba
[truncated: 11,236 more rows]

## Sheet: The picture of GO
go_name	(-LgP)
transport	90.347
cell adhesion	64.6664
ion transport	60.7328
metabolic process	37.7377
innate immune response	33.7955
regulation of ion transmembrane transport	32.6519
lipid metabolic process	32.4108
phosphorylation	31.6017
apoptotic process	29.388
protein phosphorylation	28.3835
transmembrane transport	27.55
signal transduction	26.4416
potassium ion transport	24.2682
synaptic transmission	24.1741
intracellular signal transduction	23.0149
inflammatory response	22.9229
negative regulation of apoptotic process	21.902
negative regulation of cell proliferation	21.1037
positive regulation of apoptotic process	20.2108
extracellular matrix organization	20.0885
immune response	19.4967
regulation of membrane potential	19.4367
multicellular organismal development	18.9926
positive regulation of cell migration	18.975
positive regulation of cell proliferation	18.624
angiogenesis	17.8971
oxidation-reduction process	17.3823
proteolysis	17.2143
cholesterol metabolic process	16.7003
calcium ion transport	16.6685
chemotaxis	16.0584
potassium ion transmembrane transport	15.1667
positive regulation of transcription from RNA polymerase II promoter	15.0244
nervous system development	14.8499
endocytosis	14.691
steroid metabolic process	14.6119
cell differentiation	14.2559
fatty acid biosynthetic process	14.074
cell surface receptor signaling pathway	13.8507
cytokine-mediated signaling pathway	13.5322
regulation of apoptotic process	13.3913
ion transmembrane transport	13.3524
neurotransmitter transport	13.3426
collagen fibril organization	13.3034
positive regulation of cell-substrate adhesion	13.1207
adult walking behavior	12.8638
protein autophosphorylation	12.7614
ionotropic glutamate receptor signaling pathway	12.7501
response to drug	12.5701
response to virus	11.8465
neuron projection development	11.8326
sterol biosynthetic process	11.8317
axon guidance	11.7262
protein transport	11.5485
sensory perception of pain	11.4316
memory	11.1525
positive regulation of angiogenesis	11.0729
positive regulation of ERK1 and ERK2 cascade	10.9153
transmembrane receptor protein tyrosine kinase signaling pathway	10.7952
cellular calcium ion homeostasis	10.7804
fatty acid metabolic process	10.6869
elevation of cytosolic calcium ion concentration	10.6667
locomotory behavior	10.5131
regulation of transcription, DNA-dependent	10.502
positive regulation of neuron projection development	10.4421
cell proliferation	10.4238
calcium ion transmembrane transport	10.4162
GTP catabolic process	10.3915
defense response to virus	10.355
exocytosis	10.3534
protein homooligomerization	10.1969
neutrophil chemotaxis	10.1842
response to hypoxia	10.1552
integrin-mediated signaling pathway	10.1501
sodium ion transmembrane transport	10.1127
regulation of action potential in neuron	10.0036
axonogenesis	9.95208
negative regulation of inflammatory response	9.92141
regulation of long-term neuronal synaptic plasticity	9.92039
hemopoiesis	9.89502
small GTPase mediated signal transduction	9.87298
positive regulation of peptidyl-tyrosine phosphorylation	9.6892
steroid biosynthetic process	9.54974
regulation of excitatory postsynaptic membrane potential	9.49322
wound healing	9.49189
cell-cell adhesion	9.48606
regulation of actin filament polymerization	9.3754
positive regulation of protein kinase B signaling cascade	9.20133
neurotransmitter secretion	9.0875
regulation of exocytosis	9.0875
positive regulation of NF-kappaB transcription factor activity	9.01977
cholesterol biosynthetic process	9.01704
transcription, DNA-dependent	8.77398
prostaglandin metabolic process	8.7719
chloride transport	8.64484
sodium ion transport	8.62823
release of sequestered calcium ion into cytosol	8.59953
regulation of cell shape	8.49151
induction of apoptosis	8.45728
positive regulation of tumor necrosis factor production	8.41252
response to ethanol	8.41252
negative regulation of neuron apoptotic process	8.37283
cell-matrix adhesion	8.30249
cytoskeleton organization	8.28685
neuron migration	8.26665
heart development	8.18453
phagocytosis, engulfment	8.16952
positive regulation of transcription, DNA-dependent	7.98727
regulation of neuronal synaptic plasticity	7.90377
positive regulation of cytokine secretion	7.87363
response to lipopolysaccharide	7.86986
defense response to bacterium	7.86141
positive regulation of smooth muscle cell proliferation	7.85089
learning	7.81601
positive regulation of gene expression	7.80929
regulation of growth	7.80659
cation transport	7.77341
defense response to Gram-positive bacterium	7.73708
synaptic transmission, glutamatergic	7.70757
cell migration	7.65107
response to organic substance	7.61967
protein heterooligomerization	7.56427
positive regulation of synaptic transmission	7.42708
receptor-mediated endocytosis	7.40353
negative regulation of angiogenesis	7.07472
response to stimulus	7.05086
membrane depolarization	7.00897
positive regulation of endocytosis	6.98587
positive regulation of phagocytosis	6.98311
in utero embryonic development	6.89665
T cell activation	6.8514
positive regulation of protein kinase activity	6.82634
neuron projection morphogenesis	6.82634
positive regulation of reactive oxygen species metabolic process	6.81782
antigen processing and presentation of exogenous peptide antigen via MHC class I	6.80754
amino acid transmembrane transport	6.72591
activation of MAPK activity	6.70864
positive regulation of vasoconstriction	6.70176
response to stress	6.68233
positive regulation of interleukin-6 production	6.60343
phagocytosis	6.55806
activation of cysteine-type endopeptidase activity involved in apoptotic process	6.54311
cell cycle	6.50327
regulation of cell growth	6.48472
synapse organization	6.46542
lung development	6.40817
gamma-aminobutyric acid signaling pathway	6.30988
peptidyl-serine phosphorylation	6.30579
regulation of cell proliferation	6.29996
negative regulation of peptidase activity	6.28291
visual learning	6.25781
negative regulation of catalytic activity	6.22943
negative regulation of protein phosphorylation	6.14924
sphingolipid metabolic process	6.14685
leukocyte cell-cell adhesion	6.11442
skeletal system morphogenesis	6.04372
blood vessel remodeling	6.03481
microtubule cytoskeleton organization	6.02847
positive regulation of calcium ion-dependent exocytosis	6.01755
regulation of inhibitory postsynaptic membrane potential	6.01755
negative regulation of signal transduction	5.94109
response to cytokine stimulus	5.94109
positive regulation of MAPK cascade	5.9367
cellular response to interferon-beta	5.93094
regulation of synaptic transmission	5.93094
carbohydrate metabolic process	5.8917
sensory perception of smell	5.82178
positive regulation of inflammatory response	5.79965
lipid transport	5.7661
neuromuscular process	5.75811
phospholipase C-activating G-protein coupled receptor signaling pathway	5.7205
learning or memory	5.68777
actin cytoskeleton reorganization	5.68777
regulation of dopamine secretion	5.68752
mast cell activation	5.68752
calcium ion transport into cytosol	5.68752
negative regulation of neuron differentiation	5.68243
neuropeptide signaling pathway	5.61824
homophilic cell adhesion	5.61213
collagen catabolic process	5.61057
positive regulation of epithelial cell proliferation	5.60052
defense response to protozoan	5.59483
positive regulation of nitric oxide biosynthetic process	5.59003
positive regulation of DNA replication	5.57941
cell communication	5.53201
ATP catabolic process	5.50103
response to calcium ion	5.47436
long-term memory	5.44013
peptide cross-linking	5.40931
toll-like receptor signaling pathway	5.39888
actin filament organization	5.37246
JNK cascade	5.34406
dendrite development	5.34406
negative regulation of MAP kinase activity	5.34406
myoblast proliferation	5.32518
protein complex assembly	5.2931
inner ear development	5.2931
MAPK cascade	5.28941
endothelial cell migration	5.22235
vesicle-mediated transport	5.21971
intracellular protein kinase cascade	5.19915
defense response to Gram-negative bacterium	5.1534
B cell receptor signaling pathway	5.1534
positive regulation of calcium ion transport	5.1534
MyD88-dependent toll-like receptor signaling pathway	5.14241
synaptic vesicle endocytosis	5.14241
positive regulation of I-kappaB kinase/NF-kappaB cascade	5.1099
leukocyte migration involved in inflammatory response	5.09556
mannose metabolic process	5.09556
peptide cross-linking via chondroitin 4-sulfate glycosaminoglycan	5.09556
negative regulation of synaptic transmission, GABAergic	5.09556
immunoglobulin mediated immune response	5.04787
receptor internalization	5.02006
regulation of sensory perception of pain	5.02006
cell growth	5.00776
signal transduction by phosphorylation	5.00776
synaptic transmission, cholinergic	4.91174
positive regulation of calcium ion transport into cytosol	4.91174
synaptic vesicle exocytosis	4.91174
antigen processing and presentation of exogenous peptide antigen via MHC class II	4.91174
regulation of JNK cascade	4.91174
lung alveolus development	4.9033
peptidyl-tyrosine phosphorylation	4.89281
response to hormone stimulus	4.89266
regulation of neuron apoptotic process	4.89266
respiratory gaseous exchange	4.88438
associative learning	4.77073
axon cargo transport	4.75543
hyaluronan metabolic process	4.75543
positive regulation of insulin-like growth factor receptor signaling pathway	4.75543
regulation of short-term neuronal synaptic plasticity	4.75543
negative regulation of synaptic transmission, glutamatergic	4.75543
positive regulation of protein phosphorylation	4.75327
neuromuscular process controlling balance	4.73473
regulation of immune response	4.73064
positive regulation of synapse assembly	4.73064
isoprenoid biosynthetic process	4.70225
response to nicotine	4.70225
response to cocaine	4.70225
ossification	4.67199
positive regulation of gamma-aminobutyric acid secretion	4.63781
angiogenesis involved in wound healing	4.63781
regulation of synaptic vesicle exocytosis	4.63781
skeletal system development	4.59581
cholesterol efflux	4.58562
cell death	4.57323
positive regulation of cell death	4.54169
amino acid transport	4.51791
positive regulation of fibroblast proliferation	4.51791
positive regulation of heart rate	4.51049
positive regulation vascular endothelial growth factor production	4.51049
response to ATP	4.51049
neurological system process	4.51049
regulation of alpha-amino-3-hydroxy-5-methyl-4-isoxazole propionate selective glutamate receptor activity	4.51049
kidney development	4.48598
negative regulation of endothelial cell proliferation	4.44844
cellular component movement	4.44844
aging	4.44844
response to bacterium	4.44844
middle ear morphogenesis	4.44844
negative regulation of viral genome replication	4.44844
antigen processing and presentation	4.43387
negative regulation of cell cycle	4.43387
regulation of action potential	4.33378
startle response	4.33378
regulation of sodium ion transport	4.33378
cAMP-mediated signaling	4.33378
cortical actin cytoskeleton organization	4.33378
phosphatidylinositol-mediated signaling	4.31835
regulation of cell cycle	4.27581
palate development	4.27217
positive regulation of T cell proliferation	4.2583
axonal fasciculation	4.21523
response to organic nitrogen	4.21523
positive regulation of peptidase activity	4.21523
positive regulation of tumor necrosis factor biosynthetic process	4.21523
response to morphine	4.21523
neuromuscular process controlling posture	4.21523
protein heterotrimerization	4.21523
positive regulation of catalytic activity	4.20214
synaptic vesicle maturation	4.17227
positive regulation of prostaglandin secretion	4.17227
cellular response to platelet-derived growth factor stimulus	4.17227
ovulation cycle	4.17227
positive regulation of mitochondrial depolarization	4.17227
positive regulation of T cell mediated cytotoxicity	4.17003
response to interferon-gamma	4.17003
cytosolic calcium ion homeostasis	4.17003
liver development	4.13295
microtubule-based movement	4.13295
substrate adhesion-dependent cell spreading	4.07693
L-amino acid transport	4.01755
positive regulation of extrinsic apoptotic signaling pathway	4.01755
