# Supplementary material for: Aberrant LncRNA Expression Profile in a Contusion Spinal Cord Injury Mouse Model
Source: Biomed Res Int. 2016 Sep 4;2016:9249401. doi: 10.1155/2016/9249401 (PMC5027055; doi:10.1155/2016/9249401)
Supplement: Supplementary file 1 — S1 license pdf: The License Awarded by Soochow University. Table S1: Differential Expression of LncRNAs and Annotation. Table S2: Differential Expression of mRNAs and Annotation. Table S3: mRNAs STC Increase or Decrease. Table S4: LncRNAs STC Increase or Decrease. Table S5: The Significant GO Terms for Differentially Expressed. Table S6: The Significant Pathways of Differentially Expressed Genes. Table S7: The Quantity of the mRNA and LncRNA Network. S1 Fig: The dynamic network between LncRNAs and mRNAs. In this map, the circles with a green line represented LncRNAs, and the other circles represented mRNA. The lines between circles indicated regulation between these genes. The size of the circles indicated the ability of interaction between the genes. This ability was quantified by the degree, which was defined as the connective number between genes. The color was in accordance with the results of the clustering analysis, which was defined as the K-core. The same K-core indicated the similarity and correlation of function between genes. The red color representing the maximal K-core indicated the strongest regulation level in this network. [file 9249401.f1.zip › S6 Table.xls]

## Sheet: the  description of sheet1 2
The name of table	Header	The description of header
The siginificant Pathway of differential expression genes（sheet 1）	path_id	Pathway ID corresponding with KEGG database access number
	path_name	Pathway name corresponding with KEGG database access name
	path_diffgene_count	The number of differential expression genes in one pathway
	path_gene_count	The number of genes in one pathway at KEGG database
	enrichment	Enrichment is define as evaluating the experiment effect at the same sigificance
	pvalue	Evaluating the sigificance level of pathwat (p<0.0001 with yellow color)
	FDR	False discovery rate
The differential expression genes of siginifant pathway（sheet 2）	path_id	Pathway ID corresponding with KEGG database access number
	path_name	Pathway name corresponding with KEGG database access name
	enrichment	Enrichment is define as evaluating the experiment effect at the same sigificance
	pvalue	Evaluating the sigificance level of pathwat (p<0.0001 with yellow color)
	FDR	False discovery rate
	gene_id	Gene ID corresponding with NCBI GenBank access number
	gene_name	Gene name corresponding with NCBI GenBank access name

## Sheet: sheet1
path_id	path_name	path_diffgene_count	path_gene_count	enrichment	pvalue	FDR
4080	Neuroactive ligand-receptor interaction	65	282	6.98467	5.02953e-35	1.20709e-32
4151	PI3K-Akt signaling pathway	68	356	5.78816	3.09029e-31	3.70834e-29
4510	Focal adhesion	51	205	7.53872	2.36961e-29	1.89569e-27
1100	Metabolic pathways	121	1242	2.9522	1.78488e-25	1.07093e-23
4380	Osteoclast differentiation	38	127	9.06695	2.85142e-25	1.36868e-23
4142	Lysosome	37	124	9.04194	1.39769e-24	5.59074e-23
4723	Retrograde endocannabinoid signaling	33	104	9.61528	5.68656e-23	1.94968e-21
5152	Tuberculosis	41	179	6.94085	2.77188e-22	8.31564e-21
4512	ECM-receptor interaction	30	87	10.4492	3.66012e-22	9.76031e-21
4020	Calcium signaling pathway	41	185	6.71574	1.05294e-21	2.52706e-20
4010	MAPK signaling pathway	47	259	5.49895	7.28176e-21	1.58875e-19
4810	Regulation of actin cytoskeleton	43	217	6.00469	1.05916e-20	2.11833e-19
5205	Proteoglycans in cancer	43	230	5.66529	1.11653e-19	2.06129e-18
4145	Phagosome	38	180	6.39724	2.13377e-19	3.65789e-18
4727	GABAergic synapse	28	90	9.42751	2.33596e-19	3.73754e-18
4620	Toll-like receptor signaling pathway	29	101	8.70078	6.202e-19	8.8191e-18
5033	Nicotine addiction	20	40	15.1514	6.24686e-19	8.8191e-18
4728	Dopaminergic synapse	32	135	7.18287	4.67057e-18	6.22743e-17
4060	Cytokine-cytokine receptor interaction	44	266	5.01248	5.63973e-18	7.12387e-17
5146	Amoebiasis	30	120	7.57568	1.10547e-17	1.32656e-16
4974	Protein digestion and absorption	26	88	8.95307	2.08739e-17	2.38559e-16
4725	Cholinergic synapse	29	114	7.70859	2.40352e-17	2.62202e-16
4713	Circadian entrainment	27	99	8.26438	4.72652e-17	4.93202e-16
5140	Leishmaniasis	22	66	10.1009	4.10934e-16	4.10934e-15
4724	Glutamatergic synapse	28	117	7.25193	5.03493e-16	4.83353e-15
5200	Pathways in cancer	46	326	4.27584	5.58057e-16	5.1513e-15
5032	Morphine addiction	25	93	8.14589	1.0918e-15	9.70491e-15
5142	Chagas disease (American trypanosomiasis)	26	104	7.57568	1.93672e-15	1.66004e-14
4666	Fc gamma R-mediated phagocytosis	24	92	7.90506	9.02714e-15	7.47074e-14
4721	Synaptic vesicle cycle	20	63	9.61991	2.95885e-14	2.36708e-13
4514	Cell adhesion molecules (CAMs)	30	163	5.57719	8.40088e-14	6.50391e-13
4062	Chemokine signaling pathway	33	199	5.02507	9.88928e-14	7.41696e-13
5323	Rheumatoid arthritis	22	84	7.93643	1.19598e-13	8.69805e-13
5145	Toxoplasmosis	25	113	6.70414	1.49239e-13	1.05345e-12
5132	Salmonella infection	21	79	8.05515	3.3156e-13	2.27356e-12
5133	Pertussis	20	74	8.18992	9.13545e-13	6.0903e-12
4360	Axon guidance	26	133	5.92384	1.02785e-12	6.6671e-12
4911	Insulin secretion	21	88	7.23133	3.33526e-12	2.10648e-11
4210	Apoptosis	20	84	7.21493	1.21539e-11	7.4793e-11
5164	Influenza A	28	172	4.933	1.39959e-11	8.39752e-11
4670	Leukocyte transendothelial migration	23	121	5.76002	4.41541e-11	2.58463e-10
5414	Dilated cardiomyopathy	20	90	6.73394	4.77832e-11	2.73047e-10
4064	NF-kappa B signaling pathway	21	103	6.17822	8.51404e-11	4.75202e-10
5168	Herpes simplex infection	29	211	4.16483	4.09751e-10	2.23501e-09
4650	Natural killer cell mediated cytotoxicity	22	125	5.33328	5.91567e-10	3.12482e-09
5161	Hepatitis B	24	149	4.88097	5.98925e-10	3.12482e-09
5014	Amyotrophic lateral sclerosis (ALS)	15	55	8.26438	7.79438e-10	3.98011e-09
5166	HTLV-I infection	34	290	3.55273	8.55614e-10	4.27807e-09
4970	Salivary secretion	17	77	6.69021	1.82789e-09	8.95294e-09
4540	Gap junction	18	88	6.19828	2.14419e-09	1.00903e-08
4640	Hematopoietic cell lineage	18	88	6.19828	2.14419e-09	1.00903e-08
4915	Estrogen signaling pathway	19	99	5.81567	2.25789e-09	1.02588e-08
5100	Bacterial invasion of epithelial cells	17	78	6.60444	2.26548e-09	1.02588e-08
4912	GnRH signaling pathway	18	89	6.12864	2.605e-09	1.15778e-08
4664	Fc epsilon RI signaling pathway	16	71	6.82878	4.28491e-09	1.86978e-08
5162	Measles	22	140	4.76186	5.5731e-09	2.38847e-08
5202	Transcriptional misregulation in cancer	25	181	4.18546	7.00492e-09	2.94944e-08
5410	Hypertrophic cardiomyopathy (HCM)	17	84	6.13269	7.6523e-09	3.16647e-08
4971	Gastric acid secretion	16	74	6.55194	8.19993e-09	3.33556e-08
4144	Endocytosis	28	225	3.771	8.51187e-09	3.36559e-08
4630	Jak-STAT signaling pathway	23	156	4.46771	8.55421e-09	3.36559e-08
4722	Neurotrophin signaling pathway	20	123	4.92727	1.67524e-08	6.48481e-08
5160	Hepatitis C	21	136	4.6791	1.80949e-08	6.89329e-08
5169	Epstein-Barr virus infection	27	220	3.71897	2.21703e-08	8.31386e-08
4930	Type II diabetes mellitus	13	50	7.87871	2.40068e-08	8.86404e-08
531	Glycosaminoglycan degradation	9	21	12.9869	3.74043e-08	1.36016e-07
5150	Staphylococcus aureus infection	13	52	7.57568	4.03986e-08	1.44712e-07
5222	Small cell lung cancer	16	86	5.63771	8.11637e-08	2.8646e-07
100	Steroid biosynthesis	8	17	14.2601	1.03306e-07	3.59325e-07
4662	B cell receptor signaling pathway	15	78	5.82744	1.40265e-07	4.8091e-07
5144	Malaria	12	49	7.42107	1.91597e-07	6.47653e-07
5134	Legionellosis	13	59	6.67687	2.07686e-07	6.92287e-07
4390	Hippo signaling pathway	21	156	4.07921	2.14314e-07	7.04594e-07
5031	Amphetamine addiction	14	70	6.06054	2.37076e-07	7.68896e-07
5218	Melanoma	14	73	5.81148	4.1353e-07	1.3233e-06
5412	Arrhythmogenic right ventricular cardiomyopathy (ARVC)	14	74	5.73295	4.94552e-07	1.56174e-06
5210	Colorectal cancer	13	64	6.15524	5.78253e-07	1.80235e-06
4012	ErbB signaling pathway	15	87	5.22461	6.39931e-07	1.96902e-06
480	Glutathione metabolism	12	55	6.6115	7.58637e-07	2.30472e-06
5214	Glioma	13	66	5.96872	8.46583e-07	2.53975e-06
603	Glycosphingolipid biosynthesis - globo series	7	15	14.1413	8.59726e-07	2.54734e-06
4914	Progesterone-mediated oocyte maturation	15	89	5.1072	8.72194e-07	2.55276e-06
4972	Pancreatic secretion	16	103	4.70722	1.11269e-06	3.21743e-06
564	Glycerophospholipid metabolism	15	91	4.99495	1.17813e-06	3.36608e-06
4115	p53 signaling pathway	13	69	5.70921	1.45961e-06	4.12126e-06
4740	Olfactory transduction	10	1080	0.280581	1.82296e-06	5.08733e-06
4612	Antigen processing and presentation	14	83	5.1113	2.17446e-06	5.99851e-06
4940	Type I diabetes mellitus	12	64	5.68176	4.31692e-06	1.17734e-05
4610	Complement and coagulation cascades	13	77	5.11604	5.43192e-06	1.46479e-05
4726	Serotonergic synapse	17	130	3.96266	5.83538e-06	1.5561e-05
4720	Long-term potentiation	12	70	5.19475	1.16512e-05	3.07285e-05
5203	Viral carcinogenesis	23	236	2.95323	1.71484e-05	4.47349e-05
5030	Cocaine addiction	10	50	6.06054	1.84191e-05	4.75332e-05
4066	HIF-1 signaling pathway	15	113	4.02248	1.97341e-05	5.03849e-05
4114	Oocyte meiosis	15	115	3.95253	2.45728e-05	6.14436e-05
4520	Adherens junction	12	75	4.84843	2.45774e-05	6.14436e-05
62	Fatty acid elongation	7	24	8.83829	3.56087e-05	8.81039e-05
5416	Viral myocarditis	13	94	4.1908	5.29892e-05	0.00012977
4622	RIG-I-like receptor signaling pathway	11	69	4.83087	6.16821e-05	0.000149532
4660	T cell receptor signaling pathway	14	110	3.85671	6.5974e-05	0.00015822
2010	ABC transporters	9	46	5.92879	6.65842e-05	0.00015822
5340	Primary immunodeficiency	8	36	6.73394	7.34923e-05	0.00017193
4910	Insulin signaling pathway	16	141	3.43861	7.37866e-05	0.00017193
600	Sphingolipid metabolism	9	47	5.80265	7.99481e-05	0.000184496
4920	Adipocytokine signaling pathway	11	71	4.69479	8.15348e-05	0.000186365
4621	NOD-like receptor signaling pathway	10	59	5.13605	8.60442e-05	0.000194817
4730	Long-term depression	10	61	4.96766	0.000116332	0.000260931
4623	Cytosolic DNA-sensing pathway	10	62	4.88753	0.00013462	0.000299156
650	Butanoate metabolism	7	30	7.07063	0.000176087	0.000387715
410	beta-Alanine metabolism	7	31	6.84255	0.000220974	0.000482126
5212	Pancreatic cancer	10	67	4.52279	0.000267454	0.000578279
4070	Phosphatidylinositol signaling system	11	81	4.11518	0.000285779	0.000609341
4672	Intestinal immune network for IgA production	8	43	5.63771	0.000286898	0.000609341
4270	Vascular smooth muscle contraction	14	127	3.34046	0.000330881	0.000696592
4962	Vasopressin-regulated water reabsorption	8	44	5.50958	0.00034055	0.000710713
590	Arachidonic acid metabolism	12	98	3.71054	0.000380834	0.000787933
4976	Bile secretion	10	72	4.20871	0.000498229	0.00102201
5020	Prion diseases	7	35	6.06054	0.000503544	0.00102416
1040	Biosynthesis of unsaturated fatty acids	6	25	7.27265	0.000528893	0.00106667
4141	Protein processing in endoplasmic reticulum	16	169	2.8689	0.000658371	0.00131674
511	Other glycan degradation	5	17	8.91256	0.000691364	0.0013713
430	Taurine and hypotaurine metabolism	4	10	12.1211	0.000846565	0.00166537
230	Purine metabolism	16	173	2.80256	0.000861683	0.00168133
4350	TGF-beta signaling pathway	10	83	3.65093	0.00162976	0.00315437
5034	Alcoholism	17	202	2.55023	0.00169499	0.00325438
4961	Endocrine and other factor-regulated calcium reabsorption	8	56	4.32896	0.0019238	0.00366438
52	Galactose metabolism	6	32	5.68176	0.00222137	0.00419786
4913	Ovarian steroidogenesis	8	58	4.17968	0.0024494	0.00459262
900	Terpenoid backbone biosynthesis	5	22	6.88698	0.00256437	0.00477091
5332	Graft-versus-host disease	8	59	4.10884	0.00275253	0.00508159
5215	Prostate cancer	10	89	3.4048	0.00285214	0.00522529
5220	Chronic myeloid leukemia	9	74	3.68547	0.00292423	0.00531679
250	Alanine, aspartate and glutamate metabolism	6	35	5.19475	0.00365712	0.00655006
5143	African trypanosomiasis	6	35	5.19475	0.00365712	0.00655006
5010	Alzheimer's disease	15	183	2.48383	0.00469839	0.00827626
4260	Cardiac muscle contraction	9	79	3.45221	0.00470307	0.00827626
5204	Chemical carcinogenesis	10	95	3.18976	0.0047463	0.00827626
601	Glycosphingolipid biosynthesis - lacto and neolacto series	5	25	6.06054	0.00476556	0.00827626
604	Glycosphingolipid biosynthesis - ganglio series	4	15	8.08072	0.00482091	0.00827626
4110	Cell cycle	12	129	2.81886	0.00482782	0.00827626
5322	Systemic lupus erythematosus	13	147	2.67983	0.00491449	0.00836508
4310	Wnt signaling pathway	13	148	2.66172	0.00522799	0.00883603
3320	PPAR signaling pathway	9	81	3.36697	0.00562272	0.00943673
4966	Collecting duct acid secretion	5	27	5.61161	0.006856	0.0114267
4916	Melanogenesis	10	100	3.03027	0.00701527	0.0116115
4960	Aldosterone-regulated sodium reabsorption	6	40	4.54541	0.00751729	0.0123572
5211	Renal cell carcinoma	8	69	3.51336	0.00776961	0.0126851
561	Glycerolipid metabolism	7	56	3.78784	0.00951955	0.0154371
5221	Acute myeloid leukemia	7	57	3.72139	0.010548	0.01699
514	Other types of O-glycan biosynthesis	5	30	5.05045	0.0111517	0.0178428
4978	Mineral absorption	6	46	3.95253	0.0155154	0.0245312
562	Inositol phosphate metabolism	7	61	3.47736	0.0155364	0.0245312
520	Amino sugar and nucleotide sugar metabolism	6	49	3.71054	0.0213083	0.0334248
4320	Dorso-ventral axis formation	4	22	5.50958	0.0214968	0.0335015
4130	SNARE interactions in vesicular transport	5	35	4.32896	0.0221775	0.0343394
510	N-Glycan biosynthesis	6	50	3.63633	0.0235506	0.0362317
10	Glycolysis / Gluconeogenesis	7	66	3.21392	0.0240724	0.0367986
4530	Tight junction	11	138	2.41543	0.0248441	0.0377379
5310	Asthma	4	25	4.84843	0.0343754	0.0518874
51	Fructose and mannose metabolism	5	39	3.88496	0.0353001	0.0529502
5330	Allograft rejection	6	58	3.13476	0.0480707	0.0712651
620	Pyruvate metabolism	5	42	3.60747	0.048104	0.0712651
980	Metabolism of xenobiotics by cytochrome P450	8	96	2.52523	0.0568075	0.0836429
340	Histidine metabolism	4	29	4.17968	0.0581714	0.0851288
982	Drug metabolism - cytochrome P450	8	97	2.49919	0.0601771	0.0875303
4973	Carbohydrate digestion and absorption	5	45	3.36697	0.0637377	0.0921509
4150	mTOR signaling pathway	6	62	2.93252	0.0653935	0.0939786
4370	VEGF signaling pathway	6	66	2.75479	0.0865995	0.123714
5213	Endometrial cancer	5	52	2.91372	0.112446	0.159687
3030	DNA replication	4	36	3.36697	0.120443	0.169682
280	Valine, leucine and isoleucine degradation	5	53	2.85875	0.120898	0.169682
5320	Autoimmune thyroid disease	6	73	2.49063	0.134005	0.186984
5223	Non-small cell lung cancer	5	55	2.75479	0.138973	0.192794
5219	Bladder cancer	4	39	3.10797	0.155742	0.214816
330	Arginine and proline metabolism	5	57	2.65813	0.158631	0.217551
360	Phenylalanine metabolism	3	24	3.78784	0.173365	0.235071
534	Glycosaminoglycan biosynthesis - heparan sulfate / heparin	3	24	3.78784	0.173365	0.235071
565	Ether lipid metabolism	4	41	2.95636	0.182213	0.24568
72	Synthesis and degradation of ketone bodies	2	11	5.50958	0.196503	0.263468
4146	Peroxisome	6	81	2.24465	0.205618	0.274157
4120	Ubiquitin mediated proteolysis	9	143	1.90716	0.225139	0.298436
350	Tyrosine metabolism	4	44	2.75479	0.226314	0.298436
4742	Taste transduction	5	66	2.29566	0.267095	0.350289
71	Fatty acid degradation	4	48	2.52523	0.293172	0.382399
30	Pentose phosphate pathway	3	30	3.03027	0.301187	0.390729
760	Nicotinate and nicotinamide metabolism	3	31	2.93252	0.325617	0.420151
120	Primary bile acid biosynthesis	2	16	3.78784	0.385004	0.494123
40	Pentose and glucuronate interconversions	3	34	2.67377	0.403735	0.515406
500	Starch and sucrose metabolism	4	54	2.24465	0.409863	0.520461
1230	Biosynthesis of amino acids	5	77	1.96771	0.443422	0.560113
4964	Proximal tubule bicarbonate reclamation	2	20	3.03027	0.559984	0.703645
3040	Spliceosome	1	137	0.221188	0.566463	0.708079
4975	Fat digestion and absorption	3	40	2.2727	0.579028	0.720034
5016	Huntington's disease	10	189	1.60332	0.586263	0.725274
4614	Renin-angiotensin system	2	21	2.88597	0.606036	0.74589
524	Butirosin and neomycin biosynthesis	1	5	6.06054	0.61788	0.756588
3050	Proteasome	3	44	2.06609	0.707338	0.861732
61	Fatty acid biosynthesis	1	6	5.05045	0.729501	0.8798
460	Cyanoamino acid metabolism	1	6	5.05045	0.729501	0.8798
4977	Vitamin digestion and absorption	2	24	2.52523	0.748058	0.89767
512	Mucin type O-Glycan biosynthesis	2	28	2.16448	0.94318	1
232	Caffeine metabolism	1	9	3.36697	1	1
400	Phenylalanine, tyrosine and tryptophan biosynthesis	1	9	3.36697	1	1
640	Propanoate metabolism	2	31	1.95501	1	1
4710	Circadian rhythm	2	31	1.95501	1	1
20	Citrate cycle (TCA cycle)	2	32	1.89392	1	1
4140	Regulation of autophagy	2	35	1.73158	1	1
740	Riboflavin metabolism	1	13	2.33098	1	1
790	Folate biosynthesis	1	13	2.33098	1	1
260	Glycine, serine and threonine metabolism	2	39	1.55399	1	1
533	Glycosaminoglycan biosynthesis - keratan sulfate	1	15	2.02018	1	1
532	Glycosaminoglycan biosynthesis - chondroitin sulfate / dermatan sulfate	1	20	1.51514	1	1
1210	2-Oxocarboxylic acid metabolism	1	20	1.51514	1	1
3430	Mismatch repair	1	23	1.31751	1	1
563	Glycosylphosphatidylinositol(GPI)-anchor biosynthesis	1	25	1.21211	1	1
592	alpha-Linolenic acid metabolism	1	25	1.21211	1	1
630	Glyoxylate and dicarboxylate metabolism	1	26	1.16549	1	1
4950	Maturity onset diabetes of the young	1	26	1.16549	1	1
3440	Homologous recombination	1	28	1.08224	1	1
5216	Thyroid cancer	1	29	1.04492	1	1
5012	Parkinson's disease	3	143	0.635721	1	1
860	Porphyrin and chlorophyll metabolism	2	43	1.40943	1	1
3013	RNA transport	4	172	0.704714	1	1
310	Lysine degradation	2	49	1.23685	1	1
4330	Notch signaling pathway	2	49	1.23685	1	1
4340	Hedgehog signaling pathway	2	49	1.23685	1	1
140	Steroid hormone biosynthesis	2	58	1.04492	1	1
3018	RNA degradation	3	78	1.16549	1	1
830	Retinol metabolism	3	87	1.04492	1	1
3015	mRNA surveillance pathway	2	97	0.624798	1	1
3010	Ribosome	4	159	0.762332	1	1
270	Cysteine and methionine metabolism	1	39	0.776993	1	1
380	Tryptophan metabolism	1	47	0.644739	1	1
3008	Ribosome biogenesis in eukaryotes	2	88	0.688698	1	1
190	Oxidative phosphorylation	4	142	0.853598	1	1
240	Pyrimidine metabolism	3	102	0.891256	1	1
591	Linoleic acid metabolism	1	50	0.606054	1	1
983	Drug metabolism - other enzymes	2	61	0.993532	1	1
3420	Nucleotide excision repair	1	45	0.673394	1	1
5217	Basal cell carcinoma	1	55	0.550958	1	1

## Sheet: sheet2
path_id	path_name	enrichment	pvalue	FDR	gene_id	gene_name
4080	Neuroactive ligand-receptor interaction	6.98467	5.02953e-35	1.20709e-32	14654	Glra1
4080	Neuroactive ligand-receptor interaction	6.98467	5.02953e-35	1.20709e-32	14658	Glrb
4080	Neuroactive ligand-receptor interaction	6.98467	5.02953e-35	1.20709e-32	14765	Gpr50
4080	Neuroactive ligand-receptor interaction	6.98467	5.02953e-35	1.20709e-32	14799	Gria1
4080	Neuroactive ligand-receptor interaction	6.98467	5.02953e-35	1.20709e-32	14800	Gria2
4080	Neuroactive ligand-receptor interaction	6.98467	5.02953e-35	1.20709e-32	14802	Gria4
4080	Neuroactive ligand-receptor interaction	6.98467	5.02953e-35	1.20709e-32	14803	Grid1
4080	Neuroactive ligand-receptor interaction	6.98467	5.02953e-35	1.20709e-32	14805	Grik1
4080	Neuroactive ligand-receptor interaction	6.98467	5.02953e-35	1.20709e-32	14806	Grik2
4080	Neuroactive ligand-receptor interaction	6.98467	5.02953e-35	1.20709e-32	14810	Grin1
4080	Neuroactive ligand-receptor interaction	6.98467	5.02953e-35	1.20709e-32	14811	Grin2a
4080	Neuroactive ligand-receptor interaction	6.98467	5.02953e-35	1.20709e-32	14812	Grin2b
4080	Neuroactive ligand-receptor interaction	6.98467	5.02953e-35	1.20709e-32	15558	Htr2a
4080	Neuroactive ligand-receptor interaction	6.98467	5.02953e-35	1.20709e-32	15559	Htr2b
4080	Neuroactive ligand-receptor interaction	6.98467	5.02953e-35	1.20709e-32	15560	Htr2c
4080	Neuroactive ligand-receptor interaction	6.98467	5.02953e-35	1.20709e-32	16847	Lepr
4080	Neuroactive ligand-receptor interaction	6.98467	5.02953e-35	1.20709e-32	18217	Ntsr2
4080	Neuroactive ligand-receptor interaction	6.98467	5.02953e-35	1.20709e-32	18386	Oprd1
4080	Neuroactive ligand-receptor interaction	6.98467	5.02953e-35	1.20709e-32	18387	Oprk1
4080	Neuroactive ligand-receptor interaction	6.98467	5.02953e-35	1.20709e-32	18389	Oprl1
4080	Neuroactive ligand-receptor interaction	6.98467	5.02953e-35	1.20709e-32	18438	P2rx4
4080	Neuroactive ligand-receptor interaction	6.98467	5.02953e-35	1.20709e-32	18439	P2rx7
4080	Neuroactive ligand-receptor interaction	6.98467	5.02953e-35	1.20709e-32	18440	P2rx6
4080	Neuroactive ligand-receptor interaction	6.98467	5.02953e-35	1.20709e-32	18442	P2ry2
4080	Neuroactive ligand-receptor interaction	6.98467	5.02953e-35	1.20709e-32	207911	Mchr1
4080	Neuroactive ligand-receptor interaction	6.98467	5.02953e-35	1.20709e-32	21338	Tacr3
4080	Neuroactive ligand-receptor interaction	6.98467	5.02953e-35	1.20709e-32	22045	Trhr
4080	Neuroactive ligand-receptor interaction	6.98467	5.02953e-35	1.20709e-32	233571	P2ry6
4080	Neuroactive ligand-receptor interaction	6.98467	5.02953e-35	1.20709e-32	237213	Glra2
4080	Neuroactive ligand-receptor interaction	6.98467	5.02953e-35	1.20709e-32	243764	Chrm2
4080	Neuroactive ligand-receptor interaction	6.98467	5.02953e-35	1.20709e-32	268934	Grm4
4080	Neuroactive ligand-receptor interaction	6.98467	5.02953e-35	1.20709e-32	53623	Gria3
4080	Neuroactive ligand-receptor interaction	6.98467	5.02953e-35	1.20709e-32	54393	Gabbr1
4080	Neuroactive ligand-receptor interaction	6.98467	5.02953e-35	1.20709e-32	58861	Cysltr1
4080	Neuroactive ligand-receptor interaction	6.98467	5.02953e-35	1.20709e-32	64095	Gpr35
4080	Neuroactive ligand-receptor interaction	6.98467	5.02953e-35	1.20709e-32	67168	Lpar6
4080	Neuroactive ligand-receptor interaction	6.98467	5.02953e-35	1.20709e-32	78134	Lpar4
4080	Neuroactive ligand-receptor interaction	6.98467	5.02953e-35	1.20709e-32	94045	P2rx5
4080	Neuroactive ligand-receptor interaction	6.98467	5.02953e-35	1.20709e-32	94226	S1pr5
4080	Neuroactive ligand-receptor interaction	6.98467	5.02953e-35	1.20709e-32	14407	Gabrg3
4080	Neuroactive ligand-receptor interaction	6.98467	5.02953e-35	1.20709e-32	14608	Gpr83
4080	Neuroactive ligand-receptor interaction	6.98467	5.02953e-35	1.20709e-32	14652	Glp1r
4080	Neuroactive ligand-receptor interaction	6.98467	5.02953e-35	1.20709e-32	12801	Cnr1
4080	Neuroactive ligand-receptor interaction	6.98467	5.02953e-35	1.20709e-32	108069	Grm3
4080	Neuroactive ligand-receptor interaction	6.98467	5.02953e-35	1.20709e-32	110304	Glra3
4080	Neuroactive ligand-receptor interaction	6.98467	5.02953e-35	1.20709e-32	110886	Gabra5
4080	Neuroactive ligand-receptor interaction	6.98467	5.02953e-35	1.20709e-32	11438	Chrna4
4080	Neuroactive ligand-receptor interaction	6.98467	5.02953e-35	1.20709e-32	11441	Chrna7
4080	Neuroactive ligand-receptor interaction	6.98467	5.02953e-35	1.20709e-32	11444	Chrnb2
4080	Neuroactive ligand-receptor interaction	6.98467	5.02953e-35	1.20709e-32	11517	Adcyap1r1
4080	Neuroactive ligand-receptor interaction	6.98467	5.02953e-35	1.20709e-32	11539	Adora1
4080	Neuroactive ligand-receptor interaction	6.98467	5.02953e-35	1.20709e-32	11549	Adra1a
4080	Neuroactive ligand-receptor interaction	6.98467	5.02953e-35	1.20709e-32	12257	Tspo
4080	Neuroactive ligand-receptor interaction	6.98467	5.02953e-35	1.20709e-32	12267	C3ar1
4080	Neuroactive ligand-receptor interaction	6.98467	5.02953e-35	1.20709e-32	12426	Cckbr
4080	Neuroactive ligand-receptor interaction	6.98467	5.02953e-35	1.20709e-32	14064	F2rl2
4080	Neuroactive ligand-receptor interaction	6.98467	5.02953e-35	1.20709e-32	13489	Drd2
4080	Neuroactive ligand-receptor interaction	6.98467	5.02953e-35	1.20709e-32	13610	S1pr3
4080	Neuroactive ligand-receptor interaction	6.98467	5.02953e-35	1.20709e-32	13617	Ednra
4080	Neuroactive ligand-receptor interaction	6.98467	5.02953e-35	1.20709e-32	14396	Gabra3
4080	Neuroactive ligand-receptor interaction	6.98467	5.02953e-35	1.20709e-32	140795	P2ry14
4080	Neuroactive ligand-receptor interaction	6.98467	5.02953e-35	1.20709e-32	14394	Gabra1
4080	Neuroactive ligand-receptor interaction	6.98467	5.02953e-35	1.20709e-32	14395	Gabra2
4080	Neuroactive ligand-receptor interaction	6.98467	5.02953e-35	1.20709e-32	14401	Gabrb2
4080	Neuroactive ligand-receptor interaction	6.98467	5.02953e-35	1.20709e-32	14406	Gabrg2
4151	PI3K-Akt signaling pathway	5.78816	3.09029e-31	3.70834e-29	26427	Creb3l1
4151	PI3K-Akt signaling pathway	5.78816	3.09029e-31	3.70834e-29	15234	Hgf
4151	PI3K-Akt signaling pathway	5.78816	3.09029e-31	3.70834e-29	15891	Ibsp
4151	PI3K-Akt signaling pathway	5.78816	3.09029e-31	3.70834e-29	15976	Ifnar2
4151	PI3K-Akt signaling pathway	5.78816	3.09029e-31	3.70834e-29	269643	Ppp2r2c
4151	PI3K-Akt signaling pathway	5.78816	3.09029e-31	3.70834e-29	30955	Pik3cg
4151	PI3K-Akt signaling pathway	5.78816	3.09029e-31	3.70834e-29	319480	Itga11
4151	PI3K-Akt signaling pathway	5.78816	3.09029e-31	3.70834e-29	320207	Pik3r5
4151	PI3K-Akt signaling pathway	5.78816	3.09029e-31	3.70834e-29	54635	Pdgfc
4151	PI3K-Akt signaling pathway	5.78816	3.09029e-31	3.70834e-29	64337	Gng13
4151	PI3K-Akt signaling pathway	5.78816	3.09029e-31	3.70834e-29	67168	Lpar6
4151	PI3K-Akt signaling pathway	5.78816	3.09029e-31	3.70834e-29	78134	Lpar4
4151	PI3K-Akt signaling pathway	5.78816	3.09029e-31	3.70834e-29	83490	Pik3ap1
4151	PI3K-Akt signaling pathway	5.78816	3.09029e-31	3.70834e-29	14710	Gngt2
4151	PI3K-Akt signaling pathway	5.78816	3.09029e-31	3.70834e-29	24088	Tlr2
4151	PI3K-Akt signaling pathway	5.78816	3.09029e-31	3.70834e-29	241226	Itga8
4151	PI3K-Akt signaling pathway	5.78816	3.09029e-31	3.70834e-29	243764	Chrm2
4151	PI3K-Akt signaling pathway	5.78816	3.09029e-31	3.70834e-29	12978	Csf1r
4151	PI3K-Akt signaling pathway	5.78816	3.09029e-31	3.70834e-29	12986	Csf3r
4151	PI3K-Akt signaling pathway	5.78816	3.09029e-31	3.70834e-29	13649	Egfr
4151	PI3K-Akt signaling pathway	5.78816	3.09029e-31	3.70834e-29	14164	Fgf1
4151	PI3K-Akt signaling pathway	5.78816	3.09029e-31	3.70834e-29	14165	Fgf10
4151	PI3K-Akt signaling pathway	5.78816	3.09029e-31	3.70834e-29	14166	Fgf11
4151	PI3K-Akt signaling pathway	5.78816	3.09029e-31	3.70834e-29	14180	Fgf9
4151	PI3K-Akt signaling pathway	5.78816	3.09029e-31	3.70834e-29	14268	Fn1
4151	PI3K-Akt signaling pathway	5.78816	3.09029e-31	3.70834e-29	14704	Gng3
4151	PI3K-Akt signaling pathway	5.78816	3.09029e-31	3.70834e-29	14706	Gng4
4151	PI3K-Akt signaling pathway	5.78816	3.09029e-31	3.70834e-29	16777	Lamb1
4151	PI3K-Akt signaling pathway	5.78816	3.09029e-31	3.70834e-29	17295	Met
4151	PI3K-Akt signaling pathway	5.78816	3.09029e-31	3.70834e-29	17869	Myc
4151	PI3K-Akt signaling pathway	5.78816	3.09029e-31	3.70834e-29	18414	Osmr
4151	PI3K-Akt signaling pathway	5.78816	3.09029e-31	3.70834e-29	16000	Igf1
4151	PI3K-Akt signaling pathway	5.78816	3.09029e-31	3.70834e-29	16186	Il2rg
4151	PI3K-Akt signaling pathway	5.78816	3.09029e-31	3.70834e-29	16190	Il4ra
4151	PI3K-Akt signaling pathway	5.78816	3.09029e-31	3.70834e-29	16197	Il7r
4151	PI3K-Akt signaling pathway	5.78816	3.09029e-31	3.70834e-29	16401	Itga4
4151	PI3K-Akt signaling pathway	5.78816	3.09029e-31	3.70834e-29	16412	Itgb1
4151	PI3K-Akt signaling pathway	5.78816	3.09029e-31	3.70834e-29	16419	Itgb5
4151	PI3K-Akt signaling pathway	5.78816	3.09029e-31	3.70834e-29	16773	Lama2
4151	PI3K-Akt signaling pathway	5.78816	3.09029e-31	3.70834e-29	16775	Lama4
4151	PI3K-Akt signaling pathway	5.78816	3.09029e-31	3.70834e-29	226519	Lamc1
4151	PI3K-Akt signaling pathway	5.78816	3.09029e-31	3.70834e-29	226849	Ppp2r5a
4151	PI3K-Akt signaling pathway	5.78816	3.09029e-31	3.70834e-29	12835	Col6a3
4151	PI3K-Akt signaling pathway	5.78816	3.09029e-31	3.70834e-29	12842	Col1a1
4151	PI3K-Akt signaling pathway	5.78816	3.09029e-31	3.70834e-29	18595	Pdgfra
4151	PI3K-Akt signaling pathway	5.78816	3.09029e-31	3.70834e-29	18596	Pdgfrb
4151	PI3K-Akt signaling pathway	5.78816	3.09029e-31	3.70834e-29	18762	Prkcz
4151	PI3K-Akt signaling pathway	5.78816	3.09029e-31	3.70834e-29	20393	Sgk1
4151	PI3K-Akt signaling pathway	5.78816	3.09029e-31	3.70834e-29	20750	Spp1
4151	PI3K-Akt signaling pathway	5.78816	3.09029e-31	3.70834e-29	20963	Syk
4151	PI3K-Akt signaling pathway	5.78816	3.09029e-31	3.70834e-29	21825	Thbs1
4151	PI3K-Akt signaling pathway	5.78816	3.09029e-31	3.70834e-29	21826	Thbs2
4151	PI3K-Akt signaling pathway	5.78816	3.09029e-31	3.70834e-29	21923	Tnc
4151	PI3K-Akt signaling pathway	5.78816	3.09029e-31	3.70834e-29	12832	Col5a2
4151	PI3K-Akt signaling pathway	5.78816	3.09029e-31	3.70834e-29	12833	Col6a1
4151	PI3K-Akt signaling pathway	5.78816	3.09029e-31	3.70834e-29	108079	Prkaa2
4151	PI3K-Akt signaling pathway	5.78816	3.09029e-31	3.70834e-29	11600	Angpt1
4151	PI3K-Akt signaling pathway	5.78816	3.09029e-31	3.70834e-29	12843	Col1a2
4151	PI3K-Akt signaling pathway	5.78816	3.09029e-31	3.70834e-29	12125	Bcl2l11
4151	PI3K-Akt signaling pathway	5.78816	3.09029e-31	3.70834e-29	12566	Cdk2
4151	PI3K-Akt signaling pathway	5.78816	3.09029e-31	3.70834e-29	12571	Cdk6
4151	PI3K-Akt signaling pathway	5.78816	3.09029e-31	3.70834e-29	12814	Col11a1
4151	PI3K-Akt signaling pathway	5.78816	3.09029e-31	3.70834e-29	12825	Col3a1
4151	PI3K-Akt signaling pathway	5.78816	3.09029e-31	3.70834e-29	12826	Col4a1
4151	PI3K-Akt signaling pathway	5.78816	3.09029e-31	3.70834e-29	12827	Col4a2
4151	PI3K-Akt signaling pathway	5.78816	3.09029e-31	3.70834e-29	12831	Col5a1
4151	PI3K-Akt signaling pathway	5.78816	3.09029e-31	3.70834e-29	11601	Angpt2
4151	PI3K-Akt signaling pathway	5.78816	3.09029e-31	3.70834e-29	12834	Col6a2
4510	Focal adhesion	7.53872	2.36961e-29	1.89569e-27	21826	Thbs2
4510	Focal adhesion	7.53872	2.36961e-29	1.89569e-27	107589	Mylk
4510	Focal adhesion	7.53872	2.36961e-29	1.89569e-27	21825	Thbs1
4510	Focal adhesion	7.53872	2.36961e-29	1.89569e-27	18481	Pak3
4510	Focal adhesion	7.53872	2.36961e-29	1.89569e-27	18595	Pdgfra
4510	Focal adhesion	7.53872	2.36961e-29	1.89569e-27	18596	Pdgfrb
4510	Focal adhesion	7.53872	2.36961e-29	1.89569e-27	19354	Rac2
4510	Focal adhesion	7.53872	2.36961e-29	1.89569e-27	19417	Rasgrf1
4510	Focal adhesion	7.53872	2.36961e-29	1.89569e-27	20416	Shc1
4510	Focal adhesion	7.53872	2.36961e-29	1.89569e-27	20418	Shc3
4510	Focal adhesion	7.53872	2.36961e-29	1.89569e-27	20750	Spp1
4510	Focal adhesion	7.53872	2.36961e-29	1.89569e-27	215449	Rap1b
4510	Focal adhesion	7.53872	2.36961e-29	1.89569e-27	12833	Col6a1
4510	Focal adhesion	7.53872	2.36961e-29	1.89569e-27	21894	Tln1
4510	Focal adhesion	7.53872	2.36961e-29	1.89569e-27	16775	Lama4
4510	Focal adhesion	7.53872	2.36961e-29	1.89569e-27	21923	Tnc
4510	Focal adhesion	7.53872	2.36961e-29	1.89569e-27	22324	Vav1
4510	Focal adhesion	7.53872	2.36961e-29	1.89569e-27	11796	Birc3
4510	Focal adhesion	7.53872	2.36961e-29	1.89569e-27	12389	Cav1
4510	Focal adhesion	7.53872	2.36961e-29	1.89569e-27	12814	Col11a1
4510	Focal adhesion	7.53872	2.36961e-29	1.89569e-27	12825	Col3a1
4510	Focal adhesion	7.53872	2.36961e-29	1.89569e-27	12826	Col4a1
4510	Focal adhesion	7.53872	2.36961e-29	1.89569e-27	12827	Col4a2
4510	Focal adhesion	7.53872	2.36961e-29	1.89569e-27	12831	Col5a1
4510	Focal adhesion	7.53872	2.36961e-29	1.89569e-27	12832	Col5a2
4510	Focal adhesion	7.53872	2.36961e-29	1.89569e-27	320207	Pik3r5
4510	Focal adhesion	7.53872	2.36961e-29	1.89569e-27	54635	Pdgfc
4510	Focal adhesion	7.53872	2.36961e-29	1.89569e-27	64099	Parvg
4510	Focal adhesion	7.53872	2.36961e-29	1.89569e-27	16777	Lamb1
4510	Focal adhesion	7.53872	2.36961e-29	1.89569e-27	17295	Met
4510	Focal adhesion	7.53872	2.36961e-29	1.89569e-27	18479	Pak1
4510	Focal adhesion	7.53872	2.36961e-29	1.89569e-27	22330	Vcl
4510	Focal adhesion	7.53872	2.36961e-29	1.89569e-27	226519	Lamc1
4510	Focal adhesion	7.53872	2.36961e-29	1.89569e-27	241226	Itga8
4510	Focal adhesion	7.53872	2.36961e-29	1.89569e-27	26414	Mapk10
4510	Focal adhesion	7.53872	2.36961e-29	1.89569e-27	26420	Mapk9
4510	Focal adhesion	7.53872	2.36961e-29	1.89569e-27	30955	Pik3cg
4510	Focal adhesion	7.53872	2.36961e-29	1.89569e-27	319480	Itga11
4510	Focal adhesion	7.53872	2.36961e-29	1.89569e-27	16412	Itgb1
4510	Focal adhesion	7.53872	2.36961e-29	1.89569e-27	16419	Itgb5
4510	Focal adhesion	7.53872	2.36961e-29	1.89569e-27	16773	Lama2
4510	Focal adhesion	7.53872	2.36961e-29	1.89569e-27	12834	Col6a2
4510	Focal adhesion	7.53872	2.36961e-29	1.89569e-27	12835	Col6a3
4510	Focal adhesion	7.53872	2.36961e-29	1.89569e-27	12842	Col1a1
4510	Focal adhesion	7.53872	2.36961e-29	1.89569e-27	12843	Col1a2
4510	Focal adhesion	7.53872	2.36961e-29	1.89569e-27	13649	Egfr
4510	Focal adhesion	7.53872	2.36961e-29	1.89569e-27	14268	Fn1
4510	Focal adhesion	7.53872	2.36961e-29	1.89569e-27	15234	Hgf
4510	Focal adhesion	7.53872	2.36961e-29	1.89569e-27	15891	Ibsp
4510	Focal adhesion	7.53872	2.36961e-29	1.89569e-27	16000	Igf1
4510	Focal adhesion	7.53872	2.36961e-29	1.89569e-27	16401	Itga4
1100	Metabolic pathways	2.9522	1.78488e-25	1.07093e-23	74205	Acsl3
1100	Metabolic pathways	2.9522	1.78488e-25	1.07093e-23	74596	Cds1
1100	Metabolic pathways	2.9522	1.78488e-25	1.07093e-23	74754	Dhcr24
1100	Metabolic pathways	2.9522	1.78488e-25	1.07093e-23	14923	Guk1
1100	Metabolic pathways	2.9522	1.78488e-25	1.07093e-23	75612	Gns
1100	Metabolic pathways	2.9522	1.78488e-25	1.07093e-23	76238	Grhpr
1100	Metabolic pathways	2.9522	1.78488e-25	1.07093e-23	14187	Akr1b8
1100	Metabolic pathways	2.9522	1.78488e-25	1.07093e-23	14415	Gad1
1100	Metabolic pathways	2.9522	1.78488e-25	1.07093e-23	14417	Gad2
1100	Metabolic pathways	2.9522	1.78488e-25	1.07093e-23	14420	Galc
1100	Metabolic pathways	2.9522	1.78488e-25	1.07093e-23	14466	Gba
1100	Metabolic pathways	2.9522	1.78488e-25	1.07093e-23	14537	Gcnt1
1100	Metabolic pathways	2.9522	1.78488e-25	1.07093e-23	14538	Gcnt2
1100	Metabolic pathways	2.9522	1.78488e-25	1.07093e-23	14593	Ggps1
1100	Metabolic pathways	2.9522	1.78488e-25	1.07093e-23	14595	B4galt1
1100	Metabolic pathways	2.9522	1.78488e-25	1.07093e-23	14718	Got1
1100	Metabolic pathways	2.9522	1.78488e-25	1.07093e-23	13807	Eno2
1100	Metabolic pathways	2.9522	1.78488e-25	1.07093e-23	14042	Ext1
1100	Metabolic pathways	2.9522	1.78488e-25	1.07093e-23	14104	Fasn
1100	Metabolic pathways	2.9522	1.78488e-25	1.07093e-23	14137	Fdft1
1100	Metabolic pathways	2.9522	1.78488e-25	1.07093e-23	66234	Sc4mol
1100	Metabolic pathways	2.9522	1.78488e-25	1.07093e-23	66237	Atp6v1g2
1100	Metabolic pathways	2.9522	1.78488e-25	1.07093e-23	67512	Agpat2
1100	Metabolic pathways	2.9522	1.78488e-25	1.07093e-23	67689	Aldh3b1
1100	Metabolic pathways	2.9522	1.78488e-25	1.07093e-23	68631	Cryl1
1100	Metabolic pathways	2.9522	1.78488e-25	1.07093e-23	68671	Pcyt2
1100	Metabolic pathways	2.9522	1.78488e-25	1.07093e-23	70025	Acot7
1100	Metabolic pathways	2.9522	1.78488e-25	1.07093e-23	71780	Isyna1
1100	Metabolic pathways	2.9522	1.78488e-25	1.07093e-23	73166	Tm7sf2
1100	Metabolic pathways	2.9522	1.78488e-25	1.07093e-23	22239	Ugt8a
1100	Metabolic pathways	2.9522	1.78488e-25	1.07093e-23	22436	Xdh
1100	Metabolic pathways	2.9522	1.78488e-25	1.07093e-23	225742	St8sia5
1100	Metabolic pathways	2.9522	1.78488e-25	1.07093e-23	15109	Hal
1100	Metabolic pathways	2.9522	1.78488e-25	1.07093e-23	76252	Atp6v0e2
1100	Metabolic pathways	2.9522	1.78488e-25	1.07093e-23	93961	B3galt5
1100	Metabolic pathways	2.9522	1.78488e-25	1.07093e-23	98711	Rdh10
1100	Metabolic pathways	2.9522	1.78488e-25	1.07093e-23	99010	Lpcat4
1100	Metabolic pathways	2.9522	1.78488e-25	1.07093e-23	15277	Hk2
1100	Metabolic pathways	2.9522	1.78488e-25	1.07093e-23	104112	Acly
1100	Metabolic pathways	2.9522	1.78488e-25	1.07093e-23	104759	Pld4
1100	Metabolic pathways	2.9522	1.78488e-25	1.07093e-23	109264	Me3
1100	Metabolic pathways	2.9522	1.78488e-25	1.07093e-23	110006	Gusb
1100	Metabolic pathways	2.9522	1.78488e-25	1.07093e-23	110197	Dgkg
1100	Metabolic pathways	2.9522	1.78488e-25	1.07093e-23	110208	Pgd
1100	Metabolic pathways	2.9522	1.78488e-25	1.07093e-23	11486	Ada
1100	Metabolic pathways	2.9522	1.78488e-25	1.07093e-23	11522	Adh1
1100	Metabolic pathways	2.9522	1.78488e-25	1.07093e-23	11688	Alox8
1100	Metabolic pathways	2.9522	1.78488e-25	1.07093e-23	11717	Ampd3
1100	Metabolic pathways	2.9522	1.78488e-25	1.07093e-23	11754	Aoc3
1100	Metabolic pathways	2.9522	1.78488e-25	1.07093e-23	11881	Arsb
1100	Metabolic pathways	2.9522	1.78488e-25	1.07093e-23	11886	Asah1
1100	Metabolic pathways	2.9522	1.78488e-25	1.07093e-23	11992	Auh
1100	Metabolic pathways	2.9522	1.78488e-25	1.07093e-23	12182	Bst1
1100	Metabolic pathways	2.9522	1.78488e-25	1.07093e-23	12716	Ckmt1
1100	Metabolic pathways	2.9522	1.78488e-25	1.07093e-23	12892	Cpox
1100	Metabolic pathways	2.9522	1.78488e-25	1.07093e-23	13121	Cyp51
1100	Metabolic pathways	2.9522	1.78488e-25	1.07093e-23	60525	Acss2
1100	Metabolic pathways	2.9522	1.78488e-25	1.07093e-23	64292	Ptges
1100	Metabolic pathways	2.9522	1.78488e-25	1.07093e-23	64580	Ndst4
1100	Metabolic pathways	2.9522	1.78488e-25	1.07093e-23	66054	Cndp2
1100	Metabolic pathways	2.9522	1.78488e-25	1.07093e-23	207182	Ggt7
1100	Metabolic pathways	2.9522	1.78488e-25	1.07093e-23	20775	Sqle
1100	Metabolic pathways	2.9522	1.78488e-25	1.07093e-23	208715	Hmgcs1
1100	Metabolic pathways	2.9522	1.78488e-25	1.07093e-23	211488	Ado
1100	Metabolic pathways	2.9522	1.78488e-25	1.07093e-23	212898	Dse
1100	Metabolic pathways	2.9522	1.78488e-25	1.07093e-23	21391	Tbxas1
1100	Metabolic pathways	2.9522	1.78488e-25	1.07093e-23	214579	Aldh5a1
1100	Metabolic pathways	2.9522	1.78488e-25	1.07093e-23	216739	Acsl6
1100	Metabolic pathways	2.9522	1.78488e-25	1.07093e-23	217480	Dgkb
1100	Metabolic pathways	2.9522	1.78488e-25	1.07093e-23	16790	Anpep
1100	Metabolic pathways	2.9522	1.78488e-25	1.07093e-23	268510	Mgat5b
1100	Metabolic pathways	2.9522	1.78488e-25	1.07093e-23	268860	Abat
1100	Metabolic pathways	2.9522	1.78488e-25	1.07093e-23	226518	Nmnat2
1100	Metabolic pathways	2.9522	1.78488e-25	1.07093e-23	227671	Gbgt1
1100	Metabolic pathways	2.9522	1.78488e-25	1.07093e-23	229949	Ak5
1100	Metabolic pathways	2.9522	1.78488e-25	1.07093e-23	15211	Hexa
1100	Metabolic pathways	2.9522	1.78488e-25	1.07093e-23	15212	Hexb
1100	Metabolic pathways	2.9522	1.78488e-25	1.07093e-23	235293	Sc5d
1100	Metabolic pathways	2.9522	1.78488e-25	1.07093e-23	15357	Hmgcr
1100	Metabolic pathways	2.9522	1.78488e-25	1.07093e-23	15360	Hmgcs2
1100	Metabolic pathways	2.9522	1.78488e-25	1.07093e-23	15442	Hpse
1100	Metabolic pathways	2.9522	1.78488e-25	1.07093e-23	15586	Hyal1
1100	Metabolic pathways	2.9522	1.78488e-25	1.07093e-23	56077	Dgke
1100	Metabolic pathways	2.9522	1.78488e-25	1.07093e-23	56421	Pfkp
1100	Metabolic pathways	2.9522	1.78488e-25	1.07093e-23	58193	Extl2
1100	Metabolic pathways	2.9522	1.78488e-25	1.07093e-23	269823	Pon3
1100	Metabolic pathways	2.9522	1.78488e-25	1.07093e-23	27053	Asns
1100	Metabolic pathways	2.9522	1.78488e-25	1.07093e-23	27060	Tcirg1
1100	Metabolic pathways	2.9522	1.78488e-25	1.07093e-23	271786	Galnt13
1100	Metabolic pathways	2.9522	1.78488e-25	1.07093e-23	27419	Naglu
1100	Metabolic pathways	2.9522	1.78488e-25	1.07093e-23	50917	Galns
1100	Metabolic pathways	2.9522	1.78488e-25	1.07093e-23	52538	Acaa2
1100	Metabolic pathways	2.9522	1.78488e-25	1.07093e-23	53897	Gal3st1
1100	Metabolic pathways	2.9522	1.78488e-25	1.07093e-23	54447	Asah2
1100	Metabolic pathways	2.9522	1.78488e-25	1.07093e-23	54486	Hpgds
1100	Metabolic pathways	2.9522	1.78488e-25	1.07093e-23	23959	Nt5e
1100	Metabolic pathways	2.9522	1.78488e-25	1.07093e-23	242341	Atp6v0d2
1100	Metabolic pathways	2.9522	1.78488e-25	1.07093e-23	26384	Gnpda1
1100	Metabolic pathways	2.9522	1.78488e-25	1.07093e-23	19378	Aldh1a2
1100	Metabolic pathways	2.9522	1.78488e-25	1.07093e-23	20397	Sgpl1
1100	Metabolic pathways	2.9522	1.78488e-25	1.07093e-23	20440	St6gal1
1100	Metabolic pathways	2.9522	1.78488e-25	1.07093e-23	20449	St8sia1
1100	Metabolic pathways	2.9522	1.78488e-25	1.07093e-23	230815	Man1c1
1100	Metabolic pathways	2.9522	1.78488e-25	1.07093e-23	234779	Plcg2
1100	Metabolic pathways	2.9522	1.78488e-25	1.07093e-23	18563	Pcx
1100	Metabolic pathways	2.9522	1.78488e-25	1.07093e-23	236899	Pcyt1b
1100	Metabolic pathways	2.9522	1.78488e-25	1.07093e-23	237928	Phospho1
1100	Metabolic pathways	2.9522	1.78488e-25	1.07093e-23	239559	A4galt
1100	Metabolic pathways	2.9522	1.78488e-25	1.07093e-23	18798	Plcb4
1100	Metabolic pathways	2.9522	1.78488e-25	1.07093e-23	19223	Ptgis
1100	Metabolic pathways	2.9522	1.78488e-25	1.07093e-23	19225	Ptgs2
1100	Metabolic pathways	2.9522	1.78488e-25	1.07093e-23	16987	Lss
1100	Metabolic pathways	2.9522	1.78488e-25	1.07093e-23	170835	Inpp5j
1100	Metabolic pathways	2.9522	1.78488e-25	1.07093e-23	17158	Man2a1
1100	Metabolic pathways	2.9522	1.78488e-25	1.07093e-23	17309	Mgat3
1100	Metabolic pathways	2.9522	1.78488e-25	1.07093e-23	17855	Mvk
1100	Metabolic pathways	2.9522	1.78488e-25	1.07093e-23	18125	Nos1
1100	Metabolic pathways	2.9522	1.78488e-25	1.07093e-23	18642	Pfkm
1100	Metabolic pathways	2.9522	1.78488e-25	1.07093e-23	18719	Pip5k1b
1100	Metabolic pathways	2.9522	1.78488e-25	1.07093e-23	18782	Pla2g2d
1100	Metabolic pathways	2.9522	1.78488e-25	1.07093e-23	19309	Pygm
4380	Osteoclast differentiation	9.06695	2.85142e-25	1.36868e-23	14131	Fcgr3
4380	Osteoclast differentiation	9.06695	2.85142e-25	1.36868e-23	16176	Il1b
4380	Osteoclast differentiation	9.06695	2.85142e-25	1.36868e-23	16177	Il1r1
4380	Osteoclast differentiation	9.06695	2.85142e-25	1.36868e-23	16391	Irf9
4380	Osteoclast differentiation	9.06695	2.85142e-25	1.36868e-23	16477	Junb
4380	Osteoclast differentiation	9.06695	2.85142e-25	1.36868e-23	16822	Lcp2
4380	Osteoclast differentiation	9.06695	2.85142e-25	1.36868e-23	17060	Blnk
4380	Osteoclast differentiation	9.06695	2.85142e-25	1.36868e-23	14129	Fcgr1
4380	Osteoclast differentiation	9.06695	2.85142e-25	1.36868e-23	14130	Fcgr2b
4380	Osteoclast differentiation	9.06695	2.85142e-25	1.36868e-23	20375	Sfpi1
4380	Osteoclast differentiation	9.06695	2.85142e-25	1.36868e-23	14200	Fhl2
4380	Osteoclast differentiation	9.06695	2.85142e-25	1.36868e-23	14281	Fos
4380	Osteoclast differentiation	9.06695	2.85142e-25	1.36868e-23	15976	Ifnar2
4380	Osteoclast differentiation	9.06695	2.85142e-25	1.36868e-23	15979	Ifngr1
4380	Osteoclast differentiation	9.06695	2.85142e-25	1.36868e-23	16175	Il1a
4380	Osteoclast differentiation	9.06695	2.85142e-25	1.36868e-23	21812	Tgfbr1
4380	Osteoclast differentiation	9.06695	2.85142e-25	1.36868e-23	21813	Tgfbr2
4380	Osteoclast differentiation	9.06695	2.85142e-25	1.36868e-23	12978	Csf1r
4380	Osteoclast differentiation	9.06695	2.85142e-25	1.36868e-23	13038	Ctsk
4380	Osteoclast differentiation	9.06695	2.85142e-25	1.36868e-23	13057	Cyba
4380	Osteoclast differentiation	9.06695	2.85142e-25	1.36868e-23	13058	Cybb
4380	Osteoclast differentiation	9.06695	2.85142e-25	1.36868e-23	17969	Ncf1
4380	Osteoclast differentiation	9.06695	2.85142e-25	1.36868e-23	17972	Ncf4
4380	Osteoclast differentiation	9.06695	2.85142e-25	1.36868e-23	19094	Mapk11
4380	Osteoclast differentiation	9.06695	2.85142e-25	1.36868e-23	19261	Sirpa
4380	Osteoclast differentiation	9.06695	2.85142e-25	1.36868e-23	20963	Syk
4380	Osteoclast differentiation	9.06695	2.85142e-25	1.36868e-23	21682	Tec
4380	Osteoclast differentiation	9.06695	2.85142e-25	1.36868e-23	21803	Tgfb1
4380	Osteoclast differentiation	9.06695	2.85142e-25	1.36868e-23	234779	Plcg2
4380	Osteoclast differentiation	9.06695	2.85142e-25	1.36868e-23	26414	Mapk10
4380	Osteoclast differentiation	9.06695	2.85142e-25	1.36868e-23	21937	Tnfrsf1a
4380	Osteoclast differentiation	9.06695	2.85142e-25	1.36868e-23	22177	Tyrobp
4380	Osteoclast differentiation	9.06695	2.85142e-25	1.36868e-23	320207	Pik3r5
4380	Osteoclast differentiation	9.06695	2.85142e-25	1.36868e-23	12702	Socs3
4380	Osteoclast differentiation	9.06695	2.85142e-25	1.36868e-23	26420	Mapk9
4380	Osteoclast differentiation	9.06695	2.85142e-25	1.36868e-23	30955	Pik3cg
4380	Osteoclast differentiation	9.06695	2.85142e-25	1.36868e-23	12229	Btk
4380	Osteoclast differentiation	9.06695	2.85142e-25	1.36868e-23	11433	Acp5
4142	Lysosome	9.04194	1.39769e-24	5.59074e-23	16792	Laptm5
4142	Lysosome	9.04194	1.39769e-24	5.59074e-23	14466	Gba
4142	Lysosome	9.04194	1.39769e-24	5.59074e-23	16784	Lamp2
4142	Lysosome	9.04194	1.39769e-24	5.59074e-23	14420	Galc
4142	Lysosome	9.04194	1.39769e-24	5.59074e-23	11775	Ap3b2
4142	Lysosome	9.04194	1.39769e-24	5.59074e-23	15211	Hexa
4142	Lysosome	9.04194	1.39769e-24	5.59074e-23	15212	Hexb
4142	Lysosome	9.04194	1.39769e-24	5.59074e-23	15586	Hyal1
4142	Lysosome	9.04194	1.39769e-24	5.59074e-23	18173	Slc11a1
4142	Lysosome	9.04194	1.39769e-24	5.59074e-23	13038	Ctsk
4142	Lysosome	9.04194	1.39769e-24	5.59074e-23	13039	Ctsl
4142	Lysosome	9.04194	1.39769e-24	5.59074e-23	13423	Dnase2a
4142	Lysosome	9.04194	1.39769e-24	5.59074e-23	19156	Psap
4142	Lysosome	9.04194	1.39769e-24	5.59074e-23	110006	Gusb
4142	Lysosome	9.04194	1.39769e-24	5.59074e-23	11305	Abca2
4142	Lysosome	9.04194	1.39769e-24	5.59074e-23	11433	Acp5
4142	Lysosome	9.04194	1.39769e-24	5.59074e-23	11605	Gla
4142	Lysosome	9.04194	1.39769e-24	5.59074e-23	50917	Galns
4142	Lysosome	9.04194	1.39769e-24	5.59074e-23	56325	Abcb9
4142	Lysosome	9.04194	1.39769e-24	5.59074e-23	16889	Lipa
4142	Lysosome	9.04194	1.39769e-24	5.59074e-23	17159	Man2b1
4142	Lysosome	9.04194	1.39769e-24	5.59074e-23	13030	Ctsb
4142	Lysosome	9.04194	1.39769e-24	5.59074e-23	13032	Ctsc
4142	Lysosome	9.04194	1.39769e-24	5.59074e-23	13033	Ctsd
4142	Lysosome	9.04194	1.39769e-24	5.59074e-23	19141	Lgmn
4142	Lysosome	9.04194	1.39769e-24	5.59074e-23	27419	Naglu
4142	Lysosome	9.04194	1.39769e-24	5.59074e-23	192654	Pla2g15
4142	Lysosome	9.04194	1.39769e-24	5.59074e-23	242341	Atp6v0d2
4142	Lysosome	9.04194	1.39769e-24	5.59074e-23	27060	Tcirg1
4142	Lysosome	9.04194	1.39769e-24	5.59074e-23	75612	Gns
4142	Lysosome	9.04194	1.39769e-24	5.59074e-23	12514	Cd68
4142	Lysosome	9.04194	1.39769e-24	5.59074e-23	67963	Npc2
4142	Lysosome	9.04194	1.39769e-24	5.59074e-23	74008	Arsg
4142	Lysosome	9.04194	1.39769e-24	5.59074e-23	11881	Arsb
4142	Lysosome	9.04194	1.39769e-24	5.59074e-23	11886	Asah1
4142	Lysosome	9.04194	1.39769e-24	5.59074e-23	64138	Ctsz
4142	Lysosome	9.04194	1.39769e-24	5.59074e-23	19025	Ctsa
4723	Retrograde endocannabinoid signaling	9.61528	5.68656e-23	1.94968e-21	14704	Gng3
4723	Retrograde endocannabinoid signaling	9.61528	5.68656e-23	1.94968e-21	14799	Gria1
4723	Retrograde endocannabinoid signaling	9.61528	5.68656e-23	1.94968e-21	14800	Gria2
4723	Retrograde endocannabinoid signaling	9.61528	5.68656e-23	1.94968e-21	26420	Mapk9
4723	Retrograde endocannabinoid signaling	9.61528	5.68656e-23	1.94968e-21	22348	Slc32a1
4723	Retrograde endocannabinoid signaling	9.61528	5.68656e-23	1.94968e-21	224129	Adcy5
4723	Retrograde endocannabinoid signaling	9.61528	5.68656e-23	1.94968e-21	11514	Adcy8
4723	Retrograde endocannabinoid signaling	9.61528	5.68656e-23	1.94968e-21	14394	Gabra1
4723	Retrograde endocannabinoid signaling	9.61528	5.68656e-23	1.94968e-21	53623	Gria3
4723	Retrograde endocannabinoid signaling	9.61528	5.68656e-23	1.94968e-21	64337	Gng13
4723	Retrograde endocannabinoid signaling	9.61528	5.68656e-23	1.94968e-21	26414	Mapk10
4723	Retrograde endocannabinoid signaling	9.61528	5.68656e-23	1.94968e-21	14401	Gabrb2
4723	Retrograde endocannabinoid signaling	9.61528	5.68656e-23	1.94968e-21	14406	Gabrg2
4723	Retrograde endocannabinoid signaling	9.61528	5.68656e-23	1.94968e-21	14407	Gabrg3
4723	Retrograde endocannabinoid signaling	9.61528	5.68656e-23	1.94968e-21	140919	Slc17a6
4723	Retrograde endocannabinoid signaling	9.61528	5.68656e-23	1.94968e-21	116837	Rims1
4723	Retrograde endocannabinoid signaling	9.61528	5.68656e-23	1.94968e-21	12287	Cacna1b
4723	Retrograde endocannabinoid signaling	9.61528	5.68656e-23	1.94968e-21	14706	Gng4
4723	Retrograde endocannabinoid signaling	9.61528	5.68656e-23	1.94968e-21	14681	Gnao1
4723	Retrograde endocannabinoid signaling	9.61528	5.68656e-23	1.94968e-21	110886	Gabra5
4723	Retrograde endocannabinoid signaling	9.61528	5.68656e-23	1.94968e-21	18798	Plcb4
4723	Retrograde endocannabinoid signaling	9.61528	5.68656e-23	1.94968e-21	14395	Gabra2
4723	Retrograde endocannabinoid signaling	9.61528	5.68656e-23	1.94968e-21	14710	Gngt2
4723	Retrograde endocannabinoid signaling	9.61528	5.68656e-23	1.94968e-21	210044	Adcy2
4723	Retrograde endocannabinoid signaling	9.61528	5.68656e-23	1.94968e-21	14396	Gabra3
4723	Retrograde endocannabinoid signaling	9.61528	5.68656e-23	1.94968e-21	19094	Mapk11
4723	Retrograde endocannabinoid signaling	9.61528	5.68656e-23	1.94968e-21	19225	Ptgs2
4723	Retrograde endocannabinoid signaling	9.61528	5.68656e-23	1.94968e-21	14073	Faah
4723	Retrograde endocannabinoid signaling	9.61528	5.68656e-23	1.94968e-21	11515	Adcy9
4723	Retrograde endocannabinoid signaling	9.61528	5.68656e-23	1.94968e-21	16524	Kcnj9
4723	Retrograde endocannabinoid signaling	9.61528	5.68656e-23	1.94968e-21	12801	Cnr1
4723	Retrograde endocannabinoid signaling	9.61528	5.68656e-23	1.94968e-21	14802	Gria4
4723	Retrograde endocannabinoid signaling	9.61528	5.68656e-23	1.94968e-21	16519	Kcnj3
5152	Tuberculosis	6.94085	2.77188e-22	8.31564e-21	242341	Atp6v0d2
5152	Tuberculosis	6.94085	2.77188e-22	8.31564e-21	16175	Il1a
5152	Tuberculosis	6.94085	2.77188e-22	8.31564e-21	24088	Tlr2
5152	Tuberculosis	6.94085	2.77188e-22	8.31564e-21	14961	H2-Ab1
5152	Tuberculosis	6.94085	2.77188e-22	8.31564e-21	15979	Ifngr1
5152	Tuberculosis	6.94085	2.77188e-22	8.31564e-21	266632	Irak4
5152	Tuberculosis	6.94085	2.77188e-22	8.31564e-21	27060	Tcirg1
5152	Tuberculosis	6.94085	2.77188e-22	8.31564e-21	21937	Tnfrsf1a
5152	Tuberculosis	6.94085	2.77188e-22	8.31564e-21	21897	Tlr1
5152	Tuberculosis	6.94085	2.77188e-22	8.31564e-21	18044	Nfya
5152	Tuberculosis	6.94085	2.77188e-22	8.31564e-21	19094	Mapk11
5152	Tuberculosis	6.94085	2.77188e-22	8.31564e-21	20963	Syk
5152	Tuberculosis	6.94085	2.77188e-22	8.31564e-21	17874	Myd88
5152	Tuberculosis	6.94085	2.77188e-22	8.31564e-21	16155	Il10rb
5152	Tuberculosis	6.94085	2.77188e-22	8.31564e-21	12475	Cd14
5152	Tuberculosis	6.94085	2.77188e-22	8.31564e-21	26414	Mapk10
5152	Tuberculosis	6.94085	2.77188e-22	8.31564e-21	21803	Tgfb1
5152	Tuberculosis	6.94085	2.77188e-22	8.31564e-21	26420	Mapk9
5152	Tuberculosis	6.94085	2.77188e-22	8.31564e-21	14129	Fcgr1
5152	Tuberculosis	6.94085	2.77188e-22	8.31564e-21	14130	Fcgr2b
5152	Tuberculosis	6.94085	2.77188e-22	8.31564e-21	14131	Fcgr3
5152	Tuberculosis	6.94085	2.77188e-22	8.31564e-21	14960	H2-Aa
5152	Tuberculosis	6.94085	2.77188e-22	8.31564e-21	17533	Mrc1
5152	Tuberculosis	6.94085	2.77188e-22	8.31564e-21	17534	Mrc2
5152	Tuberculosis	6.94085	2.77188e-22	8.31564e-21	12323	Camk2b
5152	Tuberculosis	6.94085	2.77188e-22	8.31564e-21	16154	Il10ra
5152	Tuberculosis	6.94085	2.77188e-22	8.31564e-21	12370	Casp8
5152	Tuberculosis	6.94085	2.77188e-22	8.31564e-21	16414	Itgb2
5152	Tuberculosis	6.94085	2.77188e-22	8.31564e-21	12721	Coro1a
5152	Tuberculosis	6.94085	2.77188e-22	8.31564e-21	13033	Ctsd
5152	Tuberculosis	6.94085	2.77188e-22	8.31564e-21	14127	Fcer1g
5152	Tuberculosis	6.94085	2.77188e-22	8.31564e-21	56644	Clec7a
5152	Tuberculosis	6.94085	2.77188e-22	8.31564e-21	16784	Lamp2
5152	Tuberculosis	6.94085	2.77188e-22	8.31564e-21	16803	Lbp
5152	Tuberculosis	6.94085	2.77188e-22	8.31564e-21	16985	Lsp1
5152	Tuberculosis	6.94085	2.77188e-22	8.31564e-21	16409	Itgam
5152	Tuberculosis	6.94085	2.77188e-22	8.31564e-21	12322	Camk2a
5152	Tuberculosis	6.94085	2.77188e-22	8.31564e-21	12325	Camk2g
5152	Tuberculosis	6.94085	2.77188e-22	8.31564e-21	56619	Clec4e
5152	Tuberculosis	6.94085	2.77188e-22	8.31564e-21	16411	Itgax
5152	Tuberculosis	6.94085	2.77188e-22	8.31564e-21	16176	Il1b
4512	ECM-receptor interaction	10.4492	3.66012e-22	9.76031e-21	12835	Col6a3
4512	ECM-receptor interaction	10.4492	3.66012e-22	9.76031e-21	14268	Fn1
4512	ECM-receptor interaction	10.4492	3.66012e-22	9.76031e-21	64051	Sv2a
4512	ECM-receptor interaction	10.4492	3.66012e-22	9.76031e-21	241226	Itga8
4512	ECM-receptor interaction	10.4492	3.66012e-22	9.76031e-21	12826	Col4a1
4512	ECM-receptor interaction	10.4492	3.66012e-22	9.76031e-21	12827	Col4a2
4512	ECM-receptor interaction	10.4492	3.66012e-22	9.76031e-21	319480	Itga11
4512	ECM-receptor interaction	10.4492	3.66012e-22	9.76031e-21	12833	Col6a1
4512	ECM-receptor interaction	10.4492	3.66012e-22	9.76031e-21	12834	Col6a2
4512	ECM-receptor interaction	10.4492	3.66012e-22	9.76031e-21	21825	Thbs1
4512	ECM-receptor interaction	10.4492	3.66012e-22	9.76031e-21	21826	Thbs2
4512	ECM-receptor interaction	10.4492	3.66012e-22	9.76031e-21	21923	Tnc
4512	ECM-receptor interaction	10.4492	3.66012e-22	9.76031e-21	226519	Lamc1
4512	ECM-receptor interaction	10.4492	3.66012e-22	9.76031e-21	16412	Itgb1
4512	ECM-receptor interaction	10.4492	3.66012e-22	9.76031e-21	64176	Sv2b
4512	ECM-receptor interaction	10.4492	3.66012e-22	9.76031e-21	12825	Col3a1
4512	ECM-receptor interaction	10.4492	3.66012e-22	9.76031e-21	12505	Cd44
4512	ECM-receptor interaction	10.4492	3.66012e-22	9.76031e-21	16777	Lamb1
4512	ECM-receptor interaction	10.4492	3.66012e-22	9.76031e-21	16419	Itgb5
4512	ECM-receptor interaction	10.4492	3.66012e-22	9.76031e-21	12831	Col5a1
4512	ECM-receptor interaction	10.4492	3.66012e-22	9.76031e-21	12832	Col5a2
4512	ECM-receptor interaction	10.4492	3.66012e-22	9.76031e-21	12843	Col1a2
4512	ECM-receptor interaction	10.4492	3.66012e-22	9.76031e-21	20750	Spp1
4512	ECM-receptor interaction	10.4492	3.66012e-22	9.76031e-21	12814	Col11a1
4512	ECM-receptor interaction	10.4492	3.66012e-22	9.76031e-21	12842	Col1a1
4512	ECM-receptor interaction	10.4492	3.66012e-22	9.76031e-21	15530	Hspg2
4512	ECM-receptor interaction	10.4492	3.66012e-22	9.76031e-21	15891	Ibsp
4512	ECM-receptor interaction	10.4492	3.66012e-22	9.76031e-21	16773	Lama2
4512	ECM-receptor interaction	10.4492	3.66012e-22	9.76031e-21	16775	Lama4
4512	ECM-receptor interaction	10.4492	3.66012e-22	9.76031e-21	16401	Itga4
4020	Calcium signaling pathway	6.71574	1.05294e-21	2.52706e-20	18438	P2rx4
4020	Calcium signaling pathway	6.71574	1.05294e-21	2.52706e-20	12325	Camk2g
4020	Calcium signaling pathway	6.71574	1.05294e-21	2.52706e-20	12426	Cckbr
4020	Calcium signaling pathway	6.71574	1.05294e-21	2.52706e-20	94045	P2rx5
4020	Calcium signaling pathway	6.71574	1.05294e-21	2.52706e-20	15560	Htr2c
4020	Calcium signaling pathway	6.71574	1.05294e-21	2.52706e-20	18125	Nos1
4020	Calcium signaling pathway	6.71574	1.05294e-21	2.52706e-20	107589	Mylk
4020	Calcium signaling pathway	6.71574	1.05294e-21	2.52706e-20	320707	Atp2b3
4020	Calcium signaling pathway	6.71574	1.05294e-21	2.52706e-20	58861	Cysltr1
4020	Calcium signaling pathway	6.71574	1.05294e-21	2.52706e-20	18440	P2rx6
4020	Calcium signaling pathway	6.71574	1.05294e-21	2.52706e-20	243764	Chrm2
4020	Calcium signaling pathway	6.71574	1.05294e-21	2.52706e-20	13617	Ednra
4020	Calcium signaling pathway	6.71574	1.05294e-21	2.52706e-20	11514	Adcy8
4020	Calcium signaling pathway	6.71574	1.05294e-21	2.52706e-20	11515	Adcy9
4020	Calcium signaling pathway	6.71574	1.05294e-21	2.52706e-20	18595	Pdgfra
4020	Calcium signaling pathway	6.71574	1.05294e-21	2.52706e-20	14810	Grin1
4020	Calcium signaling pathway	6.71574	1.05294e-21	2.52706e-20	11941	Atp2b2
4020	Calcium signaling pathway	6.71574	1.05294e-21	2.52706e-20	12182	Bst1
4020	Calcium signaling pathway	6.71574	1.05294e-21	2.52706e-20	12287	Cacna1b
4020	Calcium signaling pathway	6.71574	1.05294e-21	2.52706e-20	12290	Cacna1e
4020	Calcium signaling pathway	6.71574	1.05294e-21	2.52706e-20	12322	Camk2a
4020	Calcium signaling pathway	6.71574	1.05294e-21	2.52706e-20	12323	Camk2b
4020	Calcium signaling pathway	6.71574	1.05294e-21	2.52706e-20	110893	Slc8a3
4020	Calcium signaling pathway	6.71574	1.05294e-21	2.52706e-20	11549	Adra1a
4020	Calcium signaling pathway	6.71574	1.05294e-21	2.52706e-20	18596	Pdgfrb
4020	Calcium signaling pathway	6.71574	1.05294e-21	2.52706e-20	13649	Egfr
4020	Calcium signaling pathway	6.71574	1.05294e-21	2.52706e-20	15558	Htr2a
4020	Calcium signaling pathway	6.71574	1.05294e-21	2.52706e-20	15559	Htr2b
4020	Calcium signaling pathway	6.71574	1.05294e-21	2.52706e-20	20541	Slc8a1
4020	Calcium signaling pathway	6.71574	1.05294e-21	2.52706e-20	14811	Grin2a
4020	Calcium signaling pathway	6.71574	1.05294e-21	2.52706e-20	18439	P2rx7
4020	Calcium signaling pathway	6.71574	1.05294e-21	2.52706e-20	14676	Gna15
4020	Calcium signaling pathway	6.71574	1.05294e-21	2.52706e-20	234779	Plcg2
4020	Calcium signaling pathway	6.71574	1.05294e-21	2.52706e-20	14680	Gnal
4020	Calcium signaling pathway	6.71574	1.05294e-21	2.52706e-20	210044	Adcy2
4020	Calcium signaling pathway	6.71574	1.05294e-21	2.52706e-20	21338	Tacr3
4020	Calcium signaling pathway	6.71574	1.05294e-21	2.52706e-20	11441	Chrna7
4020	Calcium signaling pathway	6.71574	1.05294e-21	2.52706e-20	19229	Ptk2b
4020	Calcium signaling pathway	6.71574	1.05294e-21	2.52706e-20	20191	Ryr2
4020	Calcium signaling pathway	6.71574	1.05294e-21	2.52706e-20	22045	Trhr
4020	Calcium signaling pathway	6.71574	1.05294e-21	2.52706e-20	18798	Plcb4
4010	MAPK signaling pathway	5.49895	7.28176e-21	1.58875e-19	16176	Il1b
4010	MAPK signaling pathway	5.49895	7.28176e-21	1.58875e-19	26420	Mapk9
4010	MAPK signaling pathway	5.49895	7.28176e-21	1.58875e-19	17762	Mapt
4010	MAPK signaling pathway	5.49895	7.28176e-21	1.58875e-19	16177	Il1r1
4010	MAPK signaling pathway	5.49895	7.28176e-21	1.58875e-19	215449	Rap1b
4010	MAPK signaling pathway	5.49895	7.28176e-21	1.58875e-19	17869	Myc
4010	MAPK signaling pathway	5.49895	7.28176e-21	1.58875e-19	14180	Fgf9
4010	MAPK signaling pathway	5.49895	7.28176e-21	1.58875e-19	16175	Il1a
4010	MAPK signaling pathway	5.49895	7.28176e-21	1.58875e-19	26414	Mapk10
4010	MAPK signaling pathway	5.49895	7.28176e-21	1.58875e-19	14166	Fgf11
4010	MAPK signaling pathway	5.49895	7.28176e-21	1.58875e-19	21803	Tgfb1
4010	MAPK signaling pathway	5.49895	7.28176e-21	1.58875e-19	14281	Fos
4010	MAPK signaling pathway	5.49895	7.28176e-21	1.58875e-19	20112	Rps6ka2
4010	MAPK signaling pathway	5.49895	7.28176e-21	1.58875e-19	56808	Cacna2d2
4010	MAPK signaling pathway	5.49895	7.28176e-21	1.58875e-19	26404	Map3k12
4010	MAPK signaling pathway	5.49895	7.28176e-21	1.58875e-19	18596	Pdgfrb
4010	MAPK signaling pathway	5.49895	7.28176e-21	1.58875e-19	19094	Mapk11
4010	MAPK signaling pathway	5.49895	7.28176e-21	1.58875e-19	19259	Ptpn5
4010	MAPK signaling pathway	5.49895	7.28176e-21	1.58875e-19	19354	Rac2
4010	MAPK signaling pathway	5.49895	7.28176e-21	1.58875e-19	19417	Rasgrf1
4010	MAPK signaling pathway	5.49895	7.28176e-21	1.58875e-19	19418	Rasgrf2
4010	MAPK signaling pathway	5.49895	7.28176e-21	1.58875e-19	56692	Lamtor3
4010	MAPK signaling pathway	5.49895	7.28176e-21	1.58875e-19	18595	Pdgfra
4010	MAPK signaling pathway	5.49895	7.28176e-21	1.58875e-19	60597	Mapk8ip2
4010	MAPK signaling pathway	5.49895	7.28176e-21	1.58875e-19	21812	Tgfbr1
4010	MAPK signaling pathway	5.49895	7.28176e-21	1.58875e-19	18218	Dusp8
4010	MAPK signaling pathway	5.49895	7.28176e-21	1.58875e-19	26412	Map4k2
4010	MAPK signaling pathway	5.49895	7.28176e-21	1.58875e-19	12475	Cd14
4010	MAPK signaling pathway	5.49895	7.28176e-21	1.58875e-19	26406	Map3k3
4010	MAPK signaling pathway	5.49895	7.28176e-21	1.58875e-19	26410	Map3k8
4010	MAPK signaling pathway	5.49895	7.28176e-21	1.58875e-19	21813	Tgfbr2
4010	MAPK signaling pathway	5.49895	7.28176e-21	1.58875e-19	14164	Fgf1
4010	MAPK signaling pathway	5.49895	7.28176e-21	1.58875e-19	14165	Fgf10
4010	MAPK signaling pathway	5.49895	7.28176e-21	1.58875e-19	30957	Mapk8ip3
4010	MAPK signaling pathway	5.49895	7.28176e-21	1.58875e-19	13649	Egfr
4010	MAPK signaling pathway	5.49895	7.28176e-21	1.58875e-19	18479	Pak1
4010	MAPK signaling pathway	5.49895	7.28176e-21	1.58875e-19	12287	Cacna1b
4010	MAPK signaling pathway	5.49895	7.28176e-21	1.58875e-19	12290	Cacna1e
4010	MAPK signaling pathway	5.49895	7.28176e-21	1.58875e-19	23882	Gadd45g
4010	MAPK signaling pathway	5.49895	7.28176e-21	1.58875e-19	140723	Cacng5
4010	MAPK signaling pathway	5.49895	7.28176e-21	1.58875e-19	21937	Tnfrsf1a
4010	MAPK signaling pathway	5.49895	7.28176e-21	1.58875e-19	13197	Gadd45a
4010	MAPK signaling pathway	5.49895	7.28176e-21	1.58875e-19	12296	Cacnb2
4010	MAPK signaling pathway	5.49895	7.28176e-21	1.58875e-19	19099	Mapk8ip1
4010	MAPK signaling pathway	5.49895	7.28176e-21	1.58875e-19	12300	Cacng2
4010	MAPK signaling pathway	5.49895	7.28176e-21	1.58875e-19	26398	Map2k4
4010	MAPK signaling pathway	5.49895	7.28176e-21	1.58875e-19	12298	Cacnb4
4810	Regulation of actin cytoskeleton	6.00469	1.05916e-20	2.11833e-19	13800	Enah
4810	Regulation of actin cytoskeleton	6.00469	1.05916e-20	2.11833e-19	14164	Fgf1
4810	Regulation of actin cytoskeleton	6.00469	1.05916e-20	2.11833e-19	226970	Arhgef4
4810	Regulation of actin cytoskeleton	6.00469	1.05916e-20	2.11833e-19	107589	Mylk
4810	Regulation of actin cytoskeleton	6.00469	1.05916e-20	2.11833e-19	13649	Egfr
4810	Regulation of actin cytoskeleton	6.00469	1.05916e-20	2.11833e-19	12475	Cd14
4810	Regulation of actin cytoskeleton	6.00469	1.05916e-20	2.11833e-19	17886	Myh9
4810	Regulation of actin cytoskeleton	6.00469	1.05916e-20	2.11833e-19	18479	Pak1
4810	Regulation of actin cytoskeleton	6.00469	1.05916e-20	2.11833e-19	11867	Arpc1b
4810	Regulation of actin cytoskeleton	6.00469	1.05916e-20	2.11833e-19	16409	Itgam
4810	Regulation of actin cytoskeleton	6.00469	1.05916e-20	2.11833e-19	22376	Was
4810	Regulation of actin cytoskeleton	6.00469	1.05916e-20	2.11833e-19	16412	Itgb1
4810	Regulation of actin cytoskeleton	6.00469	1.05916e-20	2.11833e-19	16414	Itgb2
4810	Regulation of actin cytoskeleton	6.00469	1.05916e-20	2.11833e-19	16885	Limk1
4810	Regulation of actin cytoskeleton	6.00469	1.05916e-20	2.11833e-19	17698	Msn
4810	Regulation of actin cytoskeleton	6.00469	1.05916e-20	2.11833e-19	16419	Itgb5
4810	Regulation of actin cytoskeleton	6.00469	1.05916e-20	2.11833e-19	243764	Chrm2
4810	Regulation of actin cytoskeleton	6.00469	1.05916e-20	2.11833e-19	18481	Pak3
4810	Regulation of actin cytoskeleton	6.00469	1.05916e-20	2.11833e-19	14165	Fgf10
4810	Regulation of actin cytoskeleton	6.00469	1.05916e-20	2.11833e-19	14268	Fn1
4810	Regulation of actin cytoskeleton	6.00469	1.05916e-20	2.11833e-19	14180	Fgf9
4810	Regulation of actin cytoskeleton	6.00469	1.05916e-20	2.11833e-19	16401	Itga4
4810	Regulation of actin cytoskeleton	6.00469	1.05916e-20	2.11833e-19	19354	Rac2
4810	Regulation of actin cytoskeleton	6.00469	1.05916e-20	2.11833e-19	22324	Vav1
4810	Regulation of actin cytoskeleton	6.00469	1.05916e-20	2.11833e-19	22330	Vcl
4810	Regulation of actin cytoskeleton	6.00469	1.05916e-20	2.11833e-19	22350	Ezr
4810	Regulation of actin cytoskeleton	6.00469	1.05916e-20	2.11833e-19	23805	Apc2
4810	Regulation of actin cytoskeleton	6.00469	1.05916e-20	2.11833e-19	241226	Itga8
4810	Regulation of actin cytoskeleton	6.00469	1.05916e-20	2.11833e-19	14166	Fgf11
4810	Regulation of actin cytoskeleton	6.00469	1.05916e-20	2.11833e-19	54635	Pdgfc
4810	Regulation of actin cytoskeleton	6.00469	1.05916e-20	2.11833e-19	29875	Iqgap1
4810	Regulation of actin cytoskeleton	6.00469	1.05916e-20	2.11833e-19	18595	Pdgfra
4810	Regulation of actin cytoskeleton	6.00469	1.05916e-20	2.11833e-19	76884	Cyfip2
4810	Regulation of actin cytoskeleton	6.00469	1.05916e-20	2.11833e-19	16411	Itgax
4810	Regulation of actin cytoskeleton	6.00469	1.05916e-20	2.11833e-19	56378	Arpc3
4810	Regulation of actin cytoskeleton	6.00469	1.05916e-20	2.11833e-19	67771	Arpc5
4810	Regulation of actin cytoskeleton	6.00469	1.05916e-20	2.11833e-19	30955	Pik3cg
4810	Regulation of actin cytoskeleton	6.00469	1.05916e-20	2.11833e-19	319480	Itga11
4810	Regulation of actin cytoskeleton	6.00469	1.05916e-20	2.11833e-19	105855	Nckap1l
4810	Regulation of actin cytoskeleton	6.00469	1.05916e-20	2.11833e-19	18645	Pfn2
4810	Regulation of actin cytoskeleton	6.00469	1.05916e-20	2.11833e-19	18719	Pip5k1b
4810	Regulation of actin cytoskeleton	6.00469	1.05916e-20	2.11833e-19	18596	Pdgfrb
4810	Regulation of actin cytoskeleton	6.00469	1.05916e-20	2.11833e-19	320207	Pik3r5
5205	Proteoglycans in cancer	5.66529	1.11653e-19	2.06129e-18	17698	Msn
5205	Proteoglycans in cancer	5.66529	1.11653e-19	2.06129e-18	18479	Pak1
5205	Proteoglycans in cancer	5.66529	1.11653e-19	2.06129e-18	17869	Myc
5205	Proteoglycans in cancer	5.66529	1.11653e-19	2.06129e-18	11733	Ank1
5205	Proteoglycans in cancer	5.66529	1.11653e-19	2.06129e-18	17022	Lum
5205	Proteoglycans in cancer	5.66529	1.11653e-19	2.06129e-18	17295	Met
5205	Proteoglycans in cancer	5.66529	1.11653e-19	2.06129e-18	12842	Col1a1
5205	Proteoglycans in cancer	5.66529	1.11653e-19	2.06129e-18	16412	Itgb1
5205	Proteoglycans in cancer	5.66529	1.11653e-19	2.06129e-18	11735	Ank3
5205	Proteoglycans in cancer	5.66529	1.11653e-19	2.06129e-18	19094	Mapk11
5205	Proteoglycans in cancer	5.66529	1.11653e-19	2.06129e-18	21803	Tgfb1
5205	Proteoglycans in cancer	5.66529	1.11653e-19	2.06129e-18	17390	Mmp2
5205	Proteoglycans in cancer	5.66529	1.11653e-19	2.06129e-18	13039	Ctsl
5205	Proteoglycans in cancer	5.66529	1.11653e-19	2.06129e-18	22350	Ezr
5205	Proteoglycans in cancer	5.66529	1.11653e-19	2.06129e-18	12322	Camk2a
5205	Proteoglycans in cancer	5.66529	1.11653e-19	2.06129e-18	12323	Camk2b
5205	Proteoglycans in cancer	5.66529	1.11653e-19	2.06129e-18	21825	Thbs1
5205	Proteoglycans in cancer	5.66529	1.11653e-19	2.06129e-18	18793	Plaur
5205	Proteoglycans in cancer	5.66529	1.11653e-19	2.06129e-18	15442	Hpse
5205	Proteoglycans in cancer	5.66529	1.11653e-19	2.06129e-18	15530	Hspg2
5205	Proteoglycans in cancer	5.66529	1.11653e-19	2.06129e-18	12843	Col1a2
5205	Proteoglycans in cancer	5.66529	1.11653e-19	2.06129e-18	16002	Igf2
5205	Proteoglycans in cancer	5.66529	1.11653e-19	2.06129e-18	13179	Dcn
5205	Proteoglycans in cancer	5.66529	1.11653e-19	2.06129e-18	14164	Fgf1
5205	Proteoglycans in cancer	5.66529	1.11653e-19	2.06129e-18	14165	Fgf10
5205	Proteoglycans in cancer	5.66529	1.11653e-19	2.06129e-18	18792	Plau
5205	Proteoglycans in cancer	5.66529	1.11653e-19	2.06129e-18	14166	Fgf11
5205	Proteoglycans in cancer	5.66529	1.11653e-19	2.06129e-18	234779	Plcg2
5205	Proteoglycans in cancer	5.66529	1.11653e-19	2.06129e-18	24088	Tlr2
5205	Proteoglycans in cancer	5.66529	1.11653e-19	2.06129e-18	16000	Igf1
5205	Proteoglycans in cancer	5.66529	1.11653e-19	2.06129e-18	15234	Hgf
5205	Proteoglycans in cancer	5.66529	1.11653e-19	2.06129e-18	12389	Cav1
5205	Proteoglycans in cancer	5.66529	1.11653e-19	2.06129e-18	12505	Cd44
5205	Proteoglycans in cancer	5.66529	1.11653e-19	2.06129e-18	13649	Egfr
5205	Proteoglycans in cancer	5.66529	1.11653e-19	2.06129e-18	29875	Iqgap1
5205	Proteoglycans in cancer	5.66529	1.11653e-19	2.06129e-18	16419	Itgb5
5205	Proteoglycans in cancer	5.66529	1.11653e-19	2.06129e-18	14180	Fgf9
5205	Proteoglycans in cancer	5.66529	1.11653e-19	2.06129e-18	14268	Fn1
5205	Proteoglycans in cancer	5.66529	1.11653e-19	2.06129e-18	320207	Pik3r5
5205	Proteoglycans in cancer	5.66529	1.11653e-19	2.06129e-18	12325	Camk2g
5205	Proteoglycans in cancer	5.66529	1.11653e-19	2.06129e-18	15170	Ptpn6
5205	Proteoglycans in cancer	5.66529	1.11653e-19	2.06129e-18	30955	Pik3cg
5205	Proteoglycans in cancer	5.66529	1.11653e-19	2.06129e-18	15163	Hcls1
4145	Phagosome	6.39724	2.13377e-19	3.65789e-18	13057	Cyba
4145	Phagosome	6.39724	2.13377e-19	3.65789e-18	242341	Atp6v0d2
4145	Phagosome	6.39724	2.13377e-19	3.65789e-18	76252	Atp6v0e2
4145	Phagosome	6.39724	2.13377e-19	3.65789e-18	53857	Tuba8
4145	Phagosome	6.39724	2.13377e-19	3.65789e-18	66237	Atp6v1g2
4145	Phagosome	6.39724	2.13377e-19	3.65789e-18	12475	Cd14
4145	Phagosome	6.39724	2.13377e-19	3.65789e-18	13058	Cybb
4145	Phagosome	6.39724	2.13377e-19	3.65789e-18	27060	Tcirg1
4145	Phagosome	6.39724	2.13377e-19	3.65789e-18	13039	Ctsl
4145	Phagosome	6.39724	2.13377e-19	3.65789e-18	16412	Itgb1
4145	Phagosome	6.39724	2.13377e-19	3.65789e-18	140792	Colec12
4145	Phagosome	6.39724	2.13377e-19	3.65789e-18	14129	Fcgr1
4145	Phagosome	6.39724	2.13377e-19	3.65789e-18	17533	Mrc1
4145	Phagosome	6.39724	2.13377e-19	3.65789e-18	56644	Clec7a
4145	Phagosome	6.39724	2.13377e-19	3.65789e-18	21354	Tap1
4145	Phagosome	6.39724	2.13377e-19	3.65789e-18	12721	Coro1a
4145	Phagosome	6.39724	2.13377e-19	3.65789e-18	15024	H2-T10
4145	Phagosome	6.39724	2.13377e-19	3.65789e-18	16409	Itgam
4145	Phagosome	6.39724	2.13377e-19	3.65789e-18	22152	Tubb3
4145	Phagosome	6.39724	2.13377e-19	3.65789e-18	16414	Itgb2
4145	Phagosome	6.39724	2.13377e-19	3.65789e-18	13426	Dync1i1
4145	Phagosome	6.39724	2.13377e-19	3.65789e-18	16419	Itgb5
4145	Phagosome	6.39724	2.13377e-19	3.65789e-18	16784	Lamp2
4145	Phagosome	6.39724	2.13377e-19	3.65789e-18	17534	Mrc2
4145	Phagosome	6.39724	2.13377e-19	3.65789e-18	17969	Ncf1
4145	Phagosome	6.39724	2.13377e-19	3.65789e-18	14130	Fcgr2b
4145	Phagosome	6.39724	2.13377e-19	3.65789e-18	14131	Fcgr3
4145	Phagosome	6.39724	2.13377e-19	3.65789e-18	14960	H2-Aa
4145	Phagosome	6.39724	2.13377e-19	3.65789e-18	21825	Thbs1
4145	Phagosome	6.39724	2.13377e-19	3.65789e-18	21826	Thbs2
4145	Phagosome	6.39724	2.13377e-19	3.65789e-18	22145	Tuba4a
4145	Phagosome	6.39724	2.13377e-19	3.65789e-18	18125	Nos1
4145	Phagosome	6.39724	2.13377e-19	3.65789e-18	24088	Tlr2
4145	Phagosome	6.39724	2.13377e-19	3.65789e-18	226421	5430435G22Rik
4145	Phagosome	6.39724	2.13377e-19	3.65789e-18	17972	Ncf4
4145	Phagosome	6.39724	2.13377e-19	3.65789e-18	14972	H2-K1
4145	Phagosome	6.39724	2.13377e-19	3.65789e-18	20288	Msr1
4145	Phagosome	6.39724	2.13377e-19	3.65789e-18	14961	H2-Ab1
4727	GABAergic synapse	9.42751	2.33596e-19	3.73754e-18	15114	Hap1
4727	GABAergic synapse	9.42751	2.33596e-19	3.73754e-18	57138	Slc12a5
4727	GABAergic synapse	9.42751	2.33596e-19	3.73754e-18	14407	Gabrg3
4727	GABAergic synapse	9.42751	2.33596e-19	3.73754e-18	14704	Gng3
4727	GABAergic synapse	9.42751	2.33596e-19	3.73754e-18	14417	Gad2
4727	GABAergic synapse	9.42751	2.33596e-19	3.73754e-18	14415	Gad1
4727	GABAergic synapse	9.42751	2.33596e-19	3.73754e-18	110886	Gabra5
4727	GABAergic synapse	9.42751	2.33596e-19	3.73754e-18	57436	Gabarapl1
4727	GABAergic synapse	9.42751	2.33596e-19	3.73754e-18	14394	Gabra1
4727	GABAergic synapse	9.42751	2.33596e-19	3.73754e-18	14395	Gabra2
4727	GABAergic synapse	9.42751	2.33596e-19	3.73754e-18	14396	Gabra3
4727	GABAergic synapse	9.42751	2.33596e-19	3.73754e-18	14406	Gabrg2
4727	GABAergic synapse	9.42751	2.33596e-19	3.73754e-18	224129	Adcy5
4727	GABAergic synapse	9.42751	2.33596e-19	3.73754e-18	18195	Nsf
4727	GABAergic synapse	9.42751	2.33596e-19	3.73754e-18	210044	Adcy2
4727	GABAergic synapse	9.42751	2.33596e-19	3.73754e-18	14681	Gnao1
4727	GABAergic synapse	9.42751	2.33596e-19	3.73754e-18	11514	Adcy8
4727	GABAergic synapse	9.42751	2.33596e-19	3.73754e-18	14706	Gng4
4727	GABAergic synapse	9.42751	2.33596e-19	3.73754e-18	54393	Gabbr1
4727	GABAergic synapse	9.42751	2.33596e-19	3.73754e-18	268566	Gphn
4727	GABAergic synapse	9.42751	2.33596e-19	3.73754e-18	14401	Gabrb2
4727	GABAergic synapse	9.42751	2.33596e-19	3.73754e-18	64337	Gng13
4727	GABAergic synapse	9.42751	2.33596e-19	3.73754e-18	12287	Cacna1b
4727	GABAergic synapse	9.42751	2.33596e-19	3.73754e-18	14710	Gngt2
4727	GABAergic synapse	9.42751	2.33596e-19	3.73754e-18	22348	Slc32a1
4727	GABAergic synapse	9.42751	2.33596e-19	3.73754e-18	268860	Abat
4727	GABAergic synapse	9.42751	2.33596e-19	3.73754e-18	11515	Adcy9
4727	GABAergic synapse	9.42751	2.33596e-19	3.73754e-18	232333	Slc6a1
4620	Toll-like receptor signaling pathway	8.70078	6.202e-19	8.8191e-18	20750	Spp1
4620	Toll-like receptor signaling pathway	8.70078	6.202e-19	8.8191e-18	22031	Traf3
4620	Toll-like receptor signaling pathway	8.70078	6.202e-19	8.8191e-18	26410	Map3k8
4620	Toll-like receptor signaling pathway	8.70078	6.202e-19	8.8191e-18	24088	Tlr2
4620	Toll-like receptor signaling pathway	8.70078	6.202e-19	8.8191e-18	21897	Tlr1
4620	Toll-like receptor signaling pathway	8.70078	6.202e-19	8.8191e-18	26398	Map2k4
4620	Toll-like receptor signaling pathway	8.70078	6.202e-19	8.8191e-18	27056	Irf5
4620	Toll-like receptor signaling pathway	8.70078	6.202e-19	8.8191e-18	26414	Mapk10
4620	Toll-like receptor signaling pathway	8.70078	6.202e-19	8.8191e-18	19094	Mapk11
4620	Toll-like receptor signaling pathway	8.70078	6.202e-19	8.8191e-18	19766	Ripk1
4620	Toll-like receptor signaling pathway	8.70078	6.202e-19	8.8191e-18	20303	Ccl4
4620	Toll-like receptor signaling pathway	8.70078	6.202e-19	8.8191e-18	12475	Cd14
4620	Toll-like receptor signaling pathway	8.70078	6.202e-19	8.8191e-18	12519	Cd80
4620	Toll-like receptor signaling pathway	8.70078	6.202e-19	8.8191e-18	12524	Cd86
4620	Toll-like receptor signaling pathway	8.70078	6.202e-19	8.8191e-18	15976	Ifnar2
4620	Toll-like receptor signaling pathway	8.70078	6.202e-19	8.8191e-18	16176	Il1b
4620	Toll-like receptor signaling pathway	8.70078	6.202e-19	8.8191e-18	16803	Lbp
4620	Toll-like receptor signaling pathway	8.70078	6.202e-19	8.8191e-18	266632	Irak4
4620	Toll-like receptor signaling pathway	8.70078	6.202e-19	8.8191e-18	170743	Tlr7
4620	Toll-like receptor signaling pathway	8.70078	6.202e-19	8.8191e-18	170744	Tlr8
4620	Toll-like receptor signaling pathway	8.70078	6.202e-19	8.8191e-18	30955	Pik3cg
4620	Toll-like receptor signaling pathway	8.70078	6.202e-19	8.8191e-18	17874	Myd88
4620	Toll-like receptor signaling pathway	8.70078	6.202e-19	8.8191e-18	320207	Pik3r5
4620	Toll-like receptor signaling pathway	8.70078	6.202e-19	8.8191e-18	20302	Ccl3
4620	Toll-like receptor signaling pathway	8.70078	6.202e-19	8.8191e-18	14281	Fos
4620	Toll-like receptor signaling pathway	8.70078	6.202e-19	8.8191e-18	26420	Mapk9
4620	Toll-like receptor signaling pathway	8.70078	6.202e-19	8.8191e-18	13038	Ctsk
4620	Toll-like receptor signaling pathway	8.70078	6.202e-19	8.8191e-18	12370	Casp8
4620	Toll-like receptor signaling pathway	8.70078	6.202e-19	8.8191e-18	56489	Ikbke
5033	Nicotine addiction	15.1514	6.24686e-19	8.8191e-18	12287	Cacna1b
5033	Nicotine addiction	15.1514	6.24686e-19	8.8191e-18	53623	Gria3
5033	Nicotine addiction	15.1514	6.24686e-19	8.8191e-18	140919	Slc17a6
5033	Nicotine addiction	15.1514	6.24686e-19	8.8191e-18	11438	Chrna4
5033	Nicotine addiction	15.1514	6.24686e-19	8.8191e-18	14800	Gria2
5033	Nicotine addiction	15.1514	6.24686e-19	8.8191e-18	11441	Chrna7
5033	Nicotine addiction	15.1514	6.24686e-19	8.8191e-18	14810	Grin1
5033	Nicotine addiction	15.1514	6.24686e-19	8.8191e-18	11444	Chrnb2
5033	Nicotine addiction	15.1514	6.24686e-19	8.8191e-18	14395	Gabra2
5033	Nicotine addiction	15.1514	6.24686e-19	8.8191e-18	14396	Gabra3
5033	Nicotine addiction	15.1514	6.24686e-19	8.8191e-18	14802	Gria4
5033	Nicotine addiction	15.1514	6.24686e-19	8.8191e-18	14799	Gria1
5033	Nicotine addiction	15.1514	6.24686e-19	8.8191e-18	14406	Gabrg2
5033	Nicotine addiction	15.1514	6.24686e-19	8.8191e-18	14407	Gabrg3
5033	Nicotine addiction	15.1514	6.24686e-19	8.8191e-18	22348	Slc32a1
5033	Nicotine addiction	15.1514	6.24686e-19	8.8191e-18	110886	Gabra5
5033	Nicotine addiction	15.1514	6.24686e-19	8.8191e-18	14811	Grin2a
5033	Nicotine addiction	15.1514	6.24686e-19	8.8191e-18	14812	Grin2b
5033	Nicotine addiction	15.1514	6.24686e-19	8.8191e-18	14394	Gabra1
5033	Nicotine addiction	15.1514	6.24686e-19	8.8191e-18	14401	Gabrb2
4728	Dopaminergic synapse	7.18287	4.67057e-18	6.22743e-17	14811	Grin2a
4728	Dopaminergic synapse	7.18287	4.67057e-18	6.22743e-17	16574	Kif5c
4728	Dopaminergic synapse	7.18287	4.67057e-18	6.22743e-17	12287	Cacna1b
4728	Dopaminergic synapse	7.18287	4.67057e-18	6.22743e-17	19094	Mapk11
4728	Dopaminergic synapse	7.18287	4.67057e-18	6.22743e-17	18798	Plcb4
4728	Dopaminergic synapse	7.18287	4.67057e-18	6.22743e-17	16572	Kif5a
4728	Dopaminergic synapse	7.18287	4.67057e-18	6.22743e-17	226849	Ppp2r5a
4728	Dopaminergic synapse	7.18287	4.67057e-18	6.22743e-17	14681	Gnao1
4728	Dopaminergic synapse	7.18287	4.67057e-18	6.22743e-17	14812	Grin2b
4728	Dopaminergic synapse	7.18287	4.67057e-18	6.22743e-17	269643	Ppp2r2c
4728	Dopaminergic synapse	7.18287	4.67057e-18	6.22743e-17	16524	Kcnj9
4728	Dopaminergic synapse	7.18287	4.67057e-18	6.22743e-17	26427	Creb3l1
4728	Dopaminergic synapse	7.18287	4.67057e-18	6.22743e-17	64337	Gng13
4728	Dopaminergic synapse	7.18287	4.67057e-18	6.22743e-17	68566	Caly
4728	Dopaminergic synapse	7.18287	4.67057e-18	6.22743e-17	53623	Gria3
4728	Dopaminergic synapse	7.18287	4.67057e-18	6.22743e-17	12322	Camk2a
4728	Dopaminergic synapse	7.18287	4.67057e-18	6.22743e-17	14281	Fos
4728	Dopaminergic synapse	7.18287	4.67057e-18	6.22743e-17	14680	Gnal
4728	Dopaminergic synapse	7.18287	4.67057e-18	6.22743e-17	16519	Kcnj3
4728	Dopaminergic synapse	7.18287	4.67057e-18	6.22743e-17	224129	Adcy5
4728	Dopaminergic synapse	7.18287	4.67057e-18	6.22743e-17	14710	Gngt2
4728	Dopaminergic synapse	7.18287	4.67057e-18	6.22743e-17	14802	Gria4
4728	Dopaminergic synapse	7.18287	4.67057e-18	6.22743e-17	26414	Mapk10
4728	Dopaminergic synapse	7.18287	4.67057e-18	6.22743e-17	26420	Mapk9
4728	Dopaminergic synapse	7.18287	4.67057e-18	6.22743e-17	12325	Camk2g
4728	Dopaminergic synapse	7.18287	4.67057e-18	6.22743e-17	13489	Drd2
4728	Dopaminergic synapse	7.18287	4.67057e-18	6.22743e-17	14800	Gria2
4728	Dopaminergic synapse	7.18287	4.67057e-18	6.22743e-17	20265	Scn1a
4728	Dopaminergic synapse	7.18287	4.67057e-18	6.22743e-17	14706	Gng4
4728	Dopaminergic synapse	7.18287	4.67057e-18	6.22743e-17	14704	Gng3
4728	Dopaminergic synapse	7.18287	4.67057e-18	6.22743e-17	12323	Camk2b
4728	Dopaminergic synapse	7.18287	4.67057e-18	6.22743e-17	14799	Gria1
4060	Cytokine-cytokine receptor interaction	5.01248	5.63973e-18	7.12387e-17	21938	Tnfrsf1b
4060	Cytokine-cytokine receptor interaction	5.01248	5.63973e-18	7.12387e-17	21937	Tnfrsf1a
4060	Cytokine-cytokine receptor interaction	5.01248	5.63973e-18	7.12387e-17	21813	Tgfbr2
4060	Cytokine-cytokine receptor interaction	5.01248	5.63973e-18	7.12387e-17	12978	Csf1r
4060	Cytokine-cytokine receptor interaction	5.01248	5.63973e-18	7.12387e-17	12768	Ccr1
4060	Cytokine-cytokine receptor interaction	5.01248	5.63973e-18	7.12387e-17	16164	Il13ra1
4060	Cytokine-cytokine receptor interaction	5.01248	5.63973e-18	7.12387e-17	16175	Il1a
4060	Cytokine-cytokine receptor interaction	5.01248	5.63973e-18	7.12387e-17	16177	Il1r1
4060	Cytokine-cytokine receptor interaction	5.01248	5.63973e-18	7.12387e-17	12804	Cntfr
4060	Cytokine-cytokine receptor interaction	5.01248	5.63973e-18	7.12387e-17	20308	Ccl9
4060	Cytokine-cytokine receptor interaction	5.01248	5.63973e-18	7.12387e-17	20312	Cx3cl1
4060	Cytokine-cytokine receptor interaction	5.01248	5.63973e-18	7.12387e-17	21803	Tgfb1
4060	Cytokine-cytokine receptor interaction	5.01248	5.63973e-18	7.12387e-17	20305	Ccl6
4060	Cytokine-cytokine receptor interaction	5.01248	5.63973e-18	7.12387e-17	21944	Tnfsf12
4060	Cytokine-cytokine receptor interaction	5.01248	5.63973e-18	7.12387e-17	22035	Tnfsf10
4060	Cytokine-cytokine receptor interaction	5.01248	5.63973e-18	7.12387e-17	15979	Ifngr1
4060	Cytokine-cytokine receptor interaction	5.01248	5.63973e-18	7.12387e-17	245527	Eda2r
4060	Cytokine-cytokine receptor interaction	5.01248	5.63973e-18	7.12387e-17	54635	Pdgfc
4060	Cytokine-cytokine receptor interaction	5.01248	5.63973e-18	7.12387e-17	12983	Csf2rb
4060	Cytokine-cytokine receptor interaction	5.01248	5.63973e-18	7.12387e-17	12984	Csf2rb2
4060	Cytokine-cytokine receptor interaction	5.01248	5.63973e-18	7.12387e-17	16176	Il1b
4060	Cytokine-cytokine receptor interaction	5.01248	5.63973e-18	7.12387e-17	12986	Csf3r
4060	Cytokine-cytokine receptor interaction	5.01248	5.63973e-18	7.12387e-17	20303	Ccl4
4060	Cytokine-cytokine receptor interaction	5.01248	5.63973e-18	7.12387e-17	13051	Cx3cr1
4060	Cytokine-cytokine receptor interaction	5.01248	5.63973e-18	7.12387e-17	13649	Egfr
4060	Cytokine-cytokine receptor interaction	5.01248	5.63973e-18	7.12387e-17	21812	Tgfbr1
4060	Cytokine-cytokine receptor interaction	5.01248	5.63973e-18	7.12387e-17	15234	Hgf
4060	Cytokine-cytokine receptor interaction	5.01248	5.63973e-18	7.12387e-17	15976	Ifnar2
4060	Cytokine-cytokine receptor interaction	5.01248	5.63973e-18	7.12387e-17	16847	Lepr
4060	Cytokine-cytokine receptor interaction	5.01248	5.63973e-18	7.12387e-17	17295	Met
4060	Cytokine-cytokine receptor interaction	5.01248	5.63973e-18	7.12387e-17	18595	Pdgfra
4060	Cytokine-cytokine receptor interaction	5.01248	5.63973e-18	7.12387e-17	16154	Il10ra
4060	Cytokine-cytokine receptor interaction	5.01248	5.63973e-18	7.12387e-17	16155	Il10rb
4060	Cytokine-cytokine receptor interaction	5.01248	5.63973e-18	7.12387e-17	69583	Tnfsf13
4060	Cytokine-cytokine receptor interaction	5.01248	5.63973e-18	7.12387e-17	20302	Ccl3
4060	Cytokine-cytokine receptor interaction	5.01248	5.63973e-18	7.12387e-17	14255	Flt3
4060	Cytokine-cytokine receptor interaction	5.01248	5.63973e-18	7.12387e-17	16190	Il4ra
4060	Cytokine-cytokine receptor interaction	5.01248	5.63973e-18	7.12387e-17	16186	Il2rg
4060	Cytokine-cytokine receptor interaction	5.01248	5.63973e-18	7.12387e-17	66102	Cxcl16
4060	Cytokine-cytokine receptor interaction	5.01248	5.63973e-18	7.12387e-17	20300	Ccl25
4060	Cytokine-cytokine receptor interaction	5.01248	5.63973e-18	7.12387e-17	18596	Pdgfrb
4060	Cytokine-cytokine receptor interaction	5.01248	5.63973e-18	7.12387e-17	16197	Il7r
4060	Cytokine-cytokine receptor interaction	5.01248	5.63973e-18	7.12387e-17	20292	Ccl11
4060	Cytokine-cytokine receptor interaction	5.01248	5.63973e-18	7.12387e-17	18414	Osmr
5146	Amoebiasis	7.57568	1.10547e-17	1.32656e-16	20723	Serpinb9
5146	Amoebiasis	7.57568	1.10547e-17	1.32656e-16	12842	Col1a1
5146	Amoebiasis	7.57568	1.10547e-17	1.32656e-16	20719	Serpinb6a
5146	Amoebiasis	7.57568	1.10547e-17	1.32656e-16	16177	Il1r1
5146	Amoebiasis	7.57568	1.10547e-17	1.32656e-16	16409	Itgam
5146	Amoebiasis	7.57568	1.10547e-17	1.32656e-16	20708	Serpinb6b
5146	Amoebiasis	7.57568	1.10547e-17	1.32656e-16	12831	Col5a1
5146	Amoebiasis	7.57568	1.10547e-17	1.32656e-16	16176	Il1b
5146	Amoebiasis	7.57568	1.10547e-17	1.32656e-16	21803	Tgfb1
5146	Amoebiasis	7.57568	1.10547e-17	1.32656e-16	18798	Plcb4
5146	Amoebiasis	7.57568	1.10547e-17	1.32656e-16	12843	Col1a2
5146	Amoebiasis	7.57568	1.10547e-17	1.32656e-16	16775	Lama4
5146	Amoebiasis	7.57568	1.10547e-17	1.32656e-16	12814	Col11a1
5146	Amoebiasis	7.57568	1.10547e-17	1.32656e-16	14676	Gna15
5146	Amoebiasis	7.57568	1.10547e-17	1.32656e-16	12475	Cd14
5146	Amoebiasis	7.57568	1.10547e-17	1.32656e-16	14680	Gnal
5146	Amoebiasis	7.57568	1.10547e-17	1.32656e-16	16777	Lamb1
5146	Amoebiasis	7.57568	1.10547e-17	1.32656e-16	12832	Col5a2
5146	Amoebiasis	7.57568	1.10547e-17	1.32656e-16	12825	Col3a1
5146	Amoebiasis	7.57568	1.10547e-17	1.32656e-16	16414	Itgb2
5146	Amoebiasis	7.57568	1.10547e-17	1.32656e-16	226519	Lamc1
5146	Amoebiasis	7.57568	1.10547e-17	1.32656e-16	24088	Tlr2
5146	Amoebiasis	7.57568	1.10547e-17	1.32656e-16	320207	Pik3r5
5146	Amoebiasis	7.57568	1.10547e-17	1.32656e-16	16773	Lama2
5146	Amoebiasis	7.57568	1.10547e-17	1.32656e-16	12827	Col4a2
5146	Amoebiasis	7.57568	1.10547e-17	1.32656e-16	226421	5430435G22Rik
5146	Amoebiasis	7.57568	1.10547e-17	1.32656e-16	22330	Vcl
5146	Amoebiasis	7.57568	1.10547e-17	1.32656e-16	14268	Fn1
5146	Amoebiasis	7.57568	1.10547e-17	1.32656e-16	12826	Col4a1
5146	Amoebiasis	7.57568	1.10547e-17	1.32656e-16	30955	Pik3cg
4974	Protein digestion and absorption	8.95307	2.08739e-17	2.38559e-16	20510	Slc1a1
4974	Protein digestion and absorption	8.95307	2.08739e-17	2.38559e-16	12842	Col1a1
4974	Protein digestion and absorption	8.95307	2.08739e-17	2.38559e-16	12834	Col6a2
4974	Protein digestion and absorption	8.95307	2.08739e-17	2.38559e-16	12843	Col1a2
4974	Protein digestion and absorption	8.95307	2.08739e-17	2.38559e-16	12835	Col6a3
4974	Protein digestion and absorption	8.95307	2.08739e-17	2.38559e-16	12814	Col11a1
4974	Protein digestion and absorption	8.95307	2.08739e-17	2.38559e-16	110893	Slc8a3
4974	Protein digestion and absorption	8.95307	2.08739e-17	2.38559e-16	13717	Eln
4974	Protein digestion and absorption	8.95307	2.08739e-17	2.38559e-16	50934	Slc7a8
4974	Protein digestion and absorption	8.95307	2.08739e-17	2.38559e-16	12822	Col18a1
4974	Protein digestion and absorption	8.95307	2.08739e-17	2.38559e-16	12826	Col4a1
4974	Protein digestion and absorption	8.95307	2.08739e-17	2.38559e-16	12831	Col5a1
4974	Protein digestion and absorption	8.95307	2.08739e-17	2.38559e-16	13482	Dpp4
4974	Protein digestion and absorption	8.95307	2.08739e-17	2.38559e-16	12833	Col6a1
4974	Protein digestion and absorption	8.95307	2.08739e-17	2.38559e-16	12832	Col5a2
4974	Protein digestion and absorption	8.95307	2.08739e-17	2.38559e-16	72461	Prcp
4974	Protein digestion and absorption	8.95307	2.08739e-17	2.38559e-16	12819	Col15a1
4974	Protein digestion and absorption	8.95307	2.08739e-17	2.38559e-16	11931	Atp1b1
4974	Protein digestion and absorption	8.95307	2.08739e-17	2.38559e-16	20541	Slc8a1
4974	Protein digestion and absorption	8.95307	2.08739e-17	2.38559e-16	20540	Slc7a7
4974	Protein digestion and absorption	8.95307	2.08739e-17	2.38559e-16	232975	Atp1a3
4974	Protein digestion and absorption	8.95307	2.08739e-17	2.38559e-16	12818	Col14a1
4974	Protein digestion and absorption	8.95307	2.08739e-17	2.38559e-16	12816	Col12a1
4974	Protein digestion and absorption	8.95307	2.08739e-17	2.38559e-16	12827	Col4a2
4974	Protein digestion and absorption	8.95307	2.08739e-17	2.38559e-16	20514	Slc1a5
4974	Protein digestion and absorption	8.95307	2.08739e-17	2.38559e-16	12825	Col3a1
4725	Cholinergic synapse	7.70859	2.40352e-17	2.62202e-16	320207	Pik3r5
4725	Cholinergic synapse	7.70859	2.40352e-17	2.62202e-16	16518	Kcnj2
4725	Cholinergic synapse	7.70859	2.40352e-17	2.62202e-16	243764	Chrm2
4725	Cholinergic synapse	7.70859	2.40352e-17	2.62202e-16	12322	Camk2a
4725	Cholinergic synapse	7.70859	2.40352e-17	2.62202e-16	11444	Chrnb2
4725	Cholinergic synapse	7.70859	2.40352e-17	2.62202e-16	14706	Gng4
4725	Cholinergic synapse	7.70859	2.40352e-17	2.62202e-16	14281	Fos
4725	Cholinergic synapse	7.70859	2.40352e-17	2.62202e-16	26427	Creb3l1
4725	Cholinergic synapse	7.70859	2.40352e-17	2.62202e-16	14681	Gnao1
4725	Cholinergic synapse	7.70859	2.40352e-17	2.62202e-16	11438	Chrna4
4725	Cholinergic synapse	7.70859	2.40352e-17	2.62202e-16	110862	Kcnq3
4725	Cholinergic synapse	7.70859	2.40352e-17	2.62202e-16	12287	Cacna1b
4725	Cholinergic synapse	7.70859	2.40352e-17	2.62202e-16	63993	Slc5a7
4725	Cholinergic synapse	7.70859	2.40352e-17	2.62202e-16	210044	Adcy2
4725	Cholinergic synapse	7.70859	2.40352e-17	2.62202e-16	224129	Adcy5
4725	Cholinergic synapse	7.70859	2.40352e-17	2.62202e-16	12647	Chat
4725	Cholinergic synapse	7.70859	2.40352e-17	2.62202e-16	16536	Kcnq2
4725	Cholinergic synapse	7.70859	2.40352e-17	2.62202e-16	30955	Pik3cg
4725	Cholinergic synapse	7.70859	2.40352e-17	2.62202e-16	14704	Gng3
4725	Cholinergic synapse	7.70859	2.40352e-17	2.62202e-16	11514	Adcy8
4725	Cholinergic synapse	7.70859	2.40352e-17	2.62202e-16	12325	Camk2g
4725	Cholinergic synapse	7.70859	2.40352e-17	2.62202e-16	14710	Gngt2
4725	Cholinergic synapse	7.70859	2.40352e-17	2.62202e-16	64337	Gng13
4725	Cholinergic synapse	7.70859	2.40352e-17	2.62202e-16	18798	Plcb4
4725	Cholinergic synapse	7.70859	2.40352e-17	2.62202e-16	16519	Kcnj3
4725	Cholinergic synapse	7.70859	2.40352e-17	2.62202e-16	12323	Camk2b
4725	Cholinergic synapse	7.70859	2.40352e-17	2.62202e-16	11423	Ache
4725	Cholinergic synapse	7.70859	2.40352e-17	2.62202e-16	11441	Chrna7
4725	Cholinergic synapse	7.70859	2.40352e-17	2.62202e-16	11515	Adcy9
4713	Circadian entrainment	8.26438	4.72652e-17	4.93202e-16	14800	Gria2
4713	Circadian entrainment	8.26438	4.72652e-17	4.93202e-16	14812	Grin2b
4713	Circadian entrainment	8.26438	4.72652e-17	4.93202e-16	12325	Camk2g
4713	Circadian entrainment	8.26438	4.72652e-17	4.93202e-16	11517	Adcyap1r1
4713	Circadian entrainment	8.26438	4.72652e-17	4.93202e-16	14811	Grin2a
4713	Circadian entrainment	8.26438	4.72652e-17	4.93202e-16	12322	Camk2a
4713	Circadian entrainment	8.26438	4.72652e-17	4.93202e-16	12323	Camk2b
4713	Circadian entrainment	8.26438	4.72652e-17	4.93202e-16	16524	Kcnj9
4713	Circadian entrainment	8.26438	4.72652e-17	4.93202e-16	14281	Fos
4713	Circadian entrainment	8.26438	4.72652e-17	4.93202e-16	14810	Grin1
4713	Circadian entrainment	8.26438	4.72652e-17	4.93202e-16	14799	Gria1
4713	Circadian entrainment	8.26438	4.72652e-17	4.93202e-16	14704	Gng3
4713	Circadian entrainment	8.26438	4.72652e-17	4.93202e-16	11514	Adcy8
4713	Circadian entrainment	8.26438	4.72652e-17	4.93202e-16	16519	Kcnj3
4713	Circadian entrainment	8.26438	4.72652e-17	4.93202e-16	64337	Gng13
4713	Circadian entrainment	8.26438	4.72652e-17	4.93202e-16	14681	Gnao1
4713	Circadian entrainment	8.26438	4.72652e-17	4.93202e-16	14710	Gngt2
4713	Circadian entrainment	8.26438	4.72652e-17	4.93202e-16	14802	Gria4
4713	Circadian entrainment	8.26438	4.72652e-17	4.93202e-16	11515	Adcy9
4713	Circadian entrainment	8.26438	4.72652e-17	4.93202e-16	54195	Gucy1b3
4713	Circadian entrainment	8.26438	4.72652e-17	4.93202e-16	18125	Nos1
4713	Circadian entrainment	8.26438	4.72652e-17	4.93202e-16	14706	Gng4
4713	Circadian entrainment	8.26438	4.72652e-17	4.93202e-16	53623	Gria3
4713	Circadian entrainment	8.26438	4.72652e-17	4.93202e-16	210044	Adcy2
4713	Circadian entrainment	8.26438	4.72652e-17	4.93202e-16	224129	Adcy5
4713	Circadian entrainment	8.26438	4.72652e-17	4.93202e-16	18798	Plcb4
4713	Circadian entrainment	8.26438	4.72652e-17	4.93202e-16	20191	Ryr2
5140	Leishmaniasis	10.1009	4.10934e-16	4.10934e-15	16401	Itga4
5140	Leishmaniasis	10.1009	4.10934e-16	4.10934e-15	15979	Ifngr1
5140	Leishmaniasis	10.1009	4.10934e-16	4.10934e-15	16175	Il1a
5140	Leishmaniasis	10.1009	4.10934e-16	4.10934e-15	14960	H2-Aa
5140	Leishmaniasis	10.1009	4.10934e-16	4.10934e-15	16412	Itgb1
5140	Leishmaniasis	10.1009	4.10934e-16	4.10934e-15	14961	H2-Ab1
5140	Leishmaniasis	10.1009	4.10934e-16	4.10934e-15	15170	Ptpn6
5140	Leishmaniasis	10.1009	4.10934e-16	4.10934e-15	17969	Ncf1
5140	Leishmaniasis	10.1009	4.10934e-16	4.10934e-15	14129	Fcgr1
5140	Leishmaniasis	10.1009	4.10934e-16	4.10934e-15	17874	Myd88
5140	Leishmaniasis	10.1009	4.10934e-16	4.10934e-15	13057	Cyba
5140	Leishmaniasis	10.1009	4.10934e-16	4.10934e-15	16176	Il1b
5140	Leishmaniasis	10.1009	4.10934e-16	4.10934e-15	14281	Fos
5140	Leishmaniasis	10.1009	4.10934e-16	4.10934e-15	17972	Ncf4
5140	Leishmaniasis	10.1009	4.10934e-16	4.10934e-15	16409	Itgam
5140	Leishmaniasis	10.1009	4.10934e-16	4.10934e-15	21803	Tgfb1
5140	Leishmaniasis	10.1009	4.10934e-16	4.10934e-15	16414	Itgb2
5140	Leishmaniasis	10.1009	4.10934e-16	4.10934e-15	14131	Fcgr3
5140	Leishmaniasis	10.1009	4.10934e-16	4.10934e-15	19225	Ptgs2
5140	Leishmaniasis	10.1009	4.10934e-16	4.10934e-15	266632	Irak4
5140	Leishmaniasis	10.1009	4.10934e-16	4.10934e-15	24088	Tlr2
5140	Leishmaniasis	10.1009	4.10934e-16	4.10934e-15	19094	Mapk11
4724	Glutamatergic synapse	7.25193	5.03493e-16	4.83353e-15	224997	Dlgap1
4724	Glutamatergic synapse	7.25193	5.03493e-16	4.83353e-15	108069	Grm3
4724	Glutamatergic synapse	7.25193	5.03493e-16	4.83353e-15	14800	Gria2
4724	Glutamatergic synapse	7.25193	5.03493e-16	4.83353e-15	224129	Adcy5
4724	Glutamatergic synapse	7.25193	5.03493e-16	4.83353e-15	53623	Gria3
4724	Glutamatergic synapse	7.25193	5.03493e-16	4.83353e-15	14806	Grik2
4724	Glutamatergic synapse	7.25193	5.03493e-16	4.83353e-15	14811	Grin2a
4724	Glutamatergic synapse	7.25193	5.03493e-16	4.83353e-15	268934	Grm4
4724	Glutamatergic synapse	7.25193	5.03493e-16	4.83353e-15	210044	Adcy2
4724	Glutamatergic synapse	7.25193	5.03493e-16	4.83353e-15	14710	Gngt2
4724	Glutamatergic synapse	7.25193	5.03493e-16	4.83353e-15	14704	Gng3
4724	Glutamatergic synapse	7.25193	5.03493e-16	4.83353e-15	14681	Gnao1
4724	Glutamatergic synapse	7.25193	5.03493e-16	4.83353e-15	11514	Adcy8
4724	Glutamatergic synapse	7.25193	5.03493e-16	4.83353e-15	22063	Trpc1
4724	Glutamatergic synapse	7.25193	5.03493e-16	4.83353e-15	14805	Grik1
4724	Glutamatergic synapse	7.25193	5.03493e-16	4.83353e-15	64337	Gng13
4724	Glutamatergic synapse	7.25193	5.03493e-16	4.83353e-15	14799	Gria1
4724	Glutamatergic synapse	7.25193	5.03493e-16	4.83353e-15	18798	Plcb4
4724	Glutamatergic synapse	7.25193	5.03493e-16	4.83353e-15	14802	Gria4
4724	Glutamatergic synapse	7.25193	5.03493e-16	4.83353e-15	14812	Grin2b
4724	Glutamatergic synapse	7.25193	5.03493e-16	4.83353e-15	14810	Grin1
4724	Glutamatergic synapse	7.25193	5.03493e-16	4.83353e-15	11515	Adcy9
4724	Glutamatergic synapse	7.25193	5.03493e-16	4.83353e-15	14706	Gng4
4724	Glutamatergic synapse	7.25193	5.03493e-16	4.83353e-15	20513	Slc1a6
4724	Glutamatergic synapse	7.25193	5.03493e-16	4.83353e-15	13385	Dlg4
4724	Glutamatergic synapse	7.25193	5.03493e-16	4.83353e-15	140919	Slc17a6
4724	Glutamatergic synapse	7.25193	5.03493e-16	4.83353e-15	20510	Slc1a1
4724	Glutamatergic synapse	7.25193	5.03493e-16	4.83353e-15	16519	Kcnj3
5200	Pathways in cancer	4.27584	5.58057e-16	5.1513e-15	12370	Casp8
5200	Pathways in cancer	4.27584	5.58057e-16	5.1513e-15	17390	Mmp2
5200	Pathways in cancer	4.27584	5.58057e-16	5.1513e-15	11835	Ar
5200	Pathways in cancer	4.27584	5.58057e-16	5.1513e-15	12606	Cebpa
5200	Pathways in cancer	4.27584	5.58057e-16	5.1513e-15	17295	Met
5200	Pathways in cancer	4.27584	5.58057e-16	5.1513e-15	12827	Col4a2
5200	Pathways in cancer	4.27584	5.58057e-16	5.1513e-15	16775	Lama4
5200	Pathways in cancer	4.27584	5.58057e-16	5.1513e-15	22031	Traf3
5200	Pathways in cancer	4.27584	5.58057e-16	5.1513e-15	16777	Lamb1
5200	Pathways in cancer	4.27584	5.58057e-16	5.1513e-15	17869	Myc
5200	Pathways in cancer	4.27584	5.58057e-16	5.1513e-15	11799	Birc5
5200	Pathways in cancer	4.27584	5.58057e-16	5.1513e-15	12571	Cdk6
5200	Pathways in cancer	4.27584	5.58057e-16	5.1513e-15	12395	Runx1t1
5200	Pathways in cancer	4.27584	5.58057e-16	5.1513e-15	12826	Col4a1
5200	Pathways in cancer	4.27584	5.58057e-16	5.1513e-15	14255	Flt3
5200	Pathways in cancer	4.27584	5.58057e-16	5.1513e-15	14164	Fgf1
5200	Pathways in cancer	4.27584	5.58057e-16	5.1513e-15	14165	Fgf10
5200	Pathways in cancer	4.27584	5.58057e-16	5.1513e-15	226519	Lamc1
5200	Pathways in cancer	4.27584	5.58057e-16	5.1513e-15	320207	Pik3r5
5200	Pathways in cancer	4.27584	5.58057e-16	5.1513e-15	18595	Pdgfra
5200	Pathways in cancer	4.27584	5.58057e-16	5.1513e-15	12566	Cdk2
5200	Pathways in cancer	4.27584	5.58057e-16	5.1513e-15	26420	Mapk9
5200	Pathways in cancer	4.27584	5.58057e-16	5.1513e-15	13649	Egfr
5200	Pathways in cancer	4.27584	5.58057e-16	5.1513e-15	18596	Pdgfrb
5200	Pathways in cancer	4.27584	5.58057e-16	5.1513e-15	12978	Csf1r
5200	Pathways in cancer	4.27584	5.58057e-16	5.1513e-15	16773	Lama2
5200	Pathways in cancer	4.27584	5.58057e-16	5.1513e-15	14166	Fgf11
5200	Pathways in cancer	4.27584	5.58057e-16	5.1513e-15	30955	Pik3cg
5200	Pathways in cancer	4.27584	5.58057e-16	5.1513e-15	16412	Itgb1
5200	Pathways in cancer	4.27584	5.58057e-16	5.1513e-15	11796	Birc3
5200	Pathways in cancer	4.27584	5.58057e-16	5.1513e-15	21813	Tgfbr2
5200	Pathways in cancer	4.27584	5.58057e-16	5.1513e-15	13176	Dcc
5200	Pathways in cancer	4.27584	5.58057e-16	5.1513e-15	234779	Plcg2
5200	Pathways in cancer	4.27584	5.58057e-16	5.1513e-15	15234	Hgf
5200	Pathways in cancer	4.27584	5.58057e-16	5.1513e-15	16000	Igf1
5200	Pathways in cancer	4.27584	5.58057e-16	5.1513e-15	21812	Tgfbr1
5200	Pathways in cancer	4.27584	5.58057e-16	5.1513e-15	14180	Fgf9
5200	Pathways in cancer	4.27584	5.58057e-16	5.1513e-15	26414	Mapk10
5200	Pathways in cancer	4.27584	5.58057e-16	5.1513e-15	14268	Fn1
5200	Pathways in cancer	4.27584	5.58057e-16	5.1513e-15	23805	Apc2
5200	Pathways in cancer	4.27584	5.58057e-16	5.1513e-15	12986	Csf3r
5200	Pathways in cancer	4.27584	5.58057e-16	5.1513e-15	19225	Ptgs2
5200	Pathways in cancer	4.27584	5.58057e-16	5.1513e-15	21803	Tgfb1
5200	Pathways in cancer	4.27584	5.58057e-16	5.1513e-15	14281	Fos
5200	Pathways in cancer	4.27584	5.58057e-16	5.1513e-15	19354	Rac2
5200	Pathways in cancer	4.27584	5.58057e-16	5.1513e-15	20375	Sfpi1
5032	Morphine addiction	8.14589	1.0918e-15	9.70491e-15	14681	Gnao1
5032	Morphine addiction	8.14589	1.0918e-15	9.70491e-15	22348	Slc32a1
5032	Morphine addiction	8.14589	1.0918e-15	9.70491e-15	210044	Adcy2
5032	Morphine addiction	8.14589	1.0918e-15	9.70491e-15	11514	Adcy8
5032	Morphine addiction	8.14589	1.0918e-15	9.70491e-15	14704	Gng3
5032	Morphine addiction	8.14589	1.0918e-15	9.70491e-15	64337	Gng13
5032	Morphine addiction	8.14589	1.0918e-15	9.70491e-15	14406	Gabrg2
5032	Morphine addiction	8.14589	1.0918e-15	9.70491e-15	218461	Pde8b
5032	Morphine addiction	8.14589	1.0918e-15	9.70491e-15	12287	Cacna1b
5032	Morphine addiction	8.14589	1.0918e-15	9.70491e-15	14394	Gabra1
5032	Morphine addiction	8.14589	1.0918e-15	9.70491e-15	14407	Gabrg3
5032	Morphine addiction	8.14589	1.0918e-15	9.70491e-15	110886	Gabra5
5032	Morphine addiction	8.14589	1.0918e-15	9.70491e-15	16524	Kcnj9
5032	Morphine addiction	8.14589	1.0918e-15	9.70491e-15	16519	Kcnj3
5032	Morphine addiction	8.14589	1.0918e-15	9.70491e-15	11539	Adora1
5032	Morphine addiction	8.14589	1.0918e-15	9.70491e-15	18577	Pde4a
5032	Morphine addiction	8.14589	1.0918e-15	9.70491e-15	14396	Gabra3
5032	Morphine addiction	8.14589	1.0918e-15	9.70491e-15	14706	Gng4
5032	Morphine addiction	8.14589	1.0918e-15	9.70491e-15	11515	Adcy9
5032	Morphine addiction	8.14589	1.0918e-15	9.70491e-15	14710	Gngt2
5032	Morphine addiction	8.14589	1.0918e-15	9.70491e-15	23984	Pde10a
5032	Morphine addiction	8.14589	1.0918e-15	9.70491e-15	54393	Gabbr1
5032	Morphine addiction	8.14589	1.0918e-15	9.70491e-15	14401	Gabrb2
5032	Morphine addiction	8.14589	1.0918e-15	9.70491e-15	224129	Adcy5
5032	Morphine addiction	8.14589	1.0918e-15	9.70491e-15	14395	Gabra2
5142	Chagas disease (American trypanosomiasis)	7.57568	1.93672e-15	1.66004e-14	18798	Plcb4
5142	Chagas disease (American trypanosomiasis)	7.57568	1.93672e-15	1.66004e-14	17874	Myd88
5142	Chagas disease (American trypanosomiasis)	7.57568	1.93672e-15	1.66004e-14	12260	C1qb
5142	Chagas disease (American trypanosomiasis)	7.57568	1.93672e-15	1.66004e-14	12633	Cflar
5142	Chagas disease (American trypanosomiasis)	7.57568	1.93672e-15	1.66004e-14	16176	Il1b
5142	Chagas disease (American trypanosomiasis)	7.57568	1.93672e-15	1.66004e-14	26414	Mapk10
5142	Chagas disease (American trypanosomiasis)	7.57568	1.93672e-15	1.66004e-14	12259	C1qa
5142	Chagas disease (American trypanosomiasis)	7.57568	1.93672e-15	1.66004e-14	266632	Irak4
5142	Chagas disease (American trypanosomiasis)	7.57568	1.93672e-15	1.66004e-14	20302	Ccl3
5142	Chagas disease (American trypanosomiasis)	7.57568	1.93672e-15	1.66004e-14	15979	Ifngr1
5142	Chagas disease (American trypanosomiasis)	7.57568	1.93672e-15	1.66004e-14	320207	Pik3r5
5142	Chagas disease (American trypanosomiasis)	7.57568	1.93672e-15	1.66004e-14	14681	Gnao1
5142	Chagas disease (American trypanosomiasis)	7.57568	1.93672e-15	1.66004e-14	26398	Map2k4
5142	Chagas disease (American trypanosomiasis)	7.57568	1.93672e-15	1.66004e-14	14281	Fos
5142	Chagas disease (American trypanosomiasis)	7.57568	1.93672e-15	1.66004e-14	12370	Casp8
5142	Chagas disease (American trypanosomiasis)	7.57568	1.93672e-15	1.66004e-14	19094	Mapk11
5142	Chagas disease (American trypanosomiasis)	7.57568	1.93672e-15	1.66004e-14	14680	Gnal
5142	Chagas disease (American trypanosomiasis)	7.57568	1.93672e-15	1.66004e-14	14676	Gna15
5142	Chagas disease (American trypanosomiasis)	7.57568	1.93672e-15	1.66004e-14	21813	Tgfbr2
5142	Chagas disease (American trypanosomiasis)	7.57568	1.93672e-15	1.66004e-14	26420	Mapk9
5142	Chagas disease (American trypanosomiasis)	7.57568	1.93672e-15	1.66004e-14	24088	Tlr2
5142	Chagas disease (American trypanosomiasis)	7.57568	1.93672e-15	1.66004e-14	21812	Tgfbr1
5142	Chagas disease (American trypanosomiasis)	7.57568	1.93672e-15	1.66004e-14	21937	Tnfrsf1a
5142	Chagas disease (American trypanosomiasis)	7.57568	1.93672e-15	1.66004e-14	21803	Tgfb1
5142	Chagas disease (American trypanosomiasis)	7.57568	1.93672e-15	1.66004e-14	269643	Ppp2r2c
5142	Chagas disease (American trypanosomiasis)	7.57568	1.93672e-15	1.66004e-14	30955	Pik3cg
4666	Fc gamma R-mediated phagocytosis	7.90506	9.02714e-15	7.47074e-14	218038	Amph
4666	Fc gamma R-mediated phagocytosis	7.90506	9.02714e-15	7.47074e-14	103967	Dnm3
4666	Fc gamma R-mediated phagocytosis	7.90506	9.02714e-15	7.47074e-14	19354	Rac2
4666	Fc gamma R-mediated phagocytosis	7.90506	9.02714e-15	7.47074e-14	22376	Was
4666	Fc gamma R-mediated phagocytosis	7.90506	9.02714e-15	7.47074e-14	20963	Syk
4666	Fc gamma R-mediated phagocytosis	7.90506	9.02714e-15	7.47074e-14	13429	Dnm1
4666	Fc gamma R-mediated phagocytosis	7.90506	9.02714e-15	7.47074e-14	56378	Arpc3
4666	Fc gamma R-mediated phagocytosis	7.90506	9.02714e-15	7.47074e-14	19264	Ptprc
4666	Fc gamma R-mediated phagocytosis	7.90506	9.02714e-15	7.47074e-14	22324	Vav1
4666	Fc gamma R-mediated phagocytosis	7.90506	9.02714e-15	7.47074e-14	18479	Pak1
4666	Fc gamma R-mediated phagocytosis	7.90506	9.02714e-15	7.47074e-14	17969	Ncf1
4666	Fc gamma R-mediated phagocytosis	7.90506	9.02714e-15	7.47074e-14	11867	Arpc1b
4666	Fc gamma R-mediated phagocytosis	7.90506	9.02714e-15	7.47074e-14	67771	Arpc5
4666	Fc gamma R-mediated phagocytosis	7.90506	9.02714e-15	7.47074e-14	17096	Lyn
4666	Fc gamma R-mediated phagocytosis	7.90506	9.02714e-15	7.47074e-14	14129	Fcgr1
4666	Fc gamma R-mediated phagocytosis	7.90506	9.02714e-15	7.47074e-14	18753	Prkcd
4666	Fc gamma R-mediated phagocytosis	7.90506	9.02714e-15	7.47074e-14	234779	Plcg2
4666	Fc gamma R-mediated phagocytosis	7.90506	9.02714e-15	7.47074e-14	30955	Pik3cg
4666	Fc gamma R-mediated phagocytosis	7.90506	9.02714e-15	7.47074e-14	245880	Wasf3
4666	Fc gamma R-mediated phagocytosis	7.90506	9.02714e-15	7.47074e-14	16885	Limk1
4666	Fc gamma R-mediated phagocytosis	7.90506	9.02714e-15	7.47074e-14	320207	Pik3r5
4666	Fc gamma R-mediated phagocytosis	7.90506	9.02714e-15	7.47074e-14	18719	Pip5k1b
4666	Fc gamma R-mediated phagocytosis	7.90506	9.02714e-15	7.47074e-14	16331	Inpp5d
4666	Fc gamma R-mediated phagocytosis	7.90506	9.02714e-15	7.47074e-14	14130	Fcgr2b
4721	Synaptic vesicle cycle	9.61991	2.95885e-14	2.36708e-13	116837	Rims1
4721	Synaptic vesicle cycle	9.61991	2.95885e-14	2.36708e-13	103967	Dnm3
4721	Synaptic vesicle cycle	9.61991	2.95885e-14	2.36708e-13	140919	Slc17a6
4721	Synaptic vesicle cycle	9.61991	2.95885e-14	2.36708e-13	12890	Cplx2
4721	Synaptic vesicle cycle	9.61991	2.95885e-14	2.36708e-13	242341	Atp6v0d2
4721	Synaptic vesicle cycle	9.61991	2.95885e-14	2.36708e-13	27060	Tcirg1
4721	Synaptic vesicle cycle	9.61991	2.95885e-14	2.36708e-13	56216	Stx1b
4721	Synaptic vesicle cycle	9.61991	2.95885e-14	2.36708e-13	208898	Unc13c
4721	Synaptic vesicle cycle	9.61991	2.95885e-14	2.36708e-13	382018	Unc13a
4721	Synaptic vesicle cycle	9.61991	2.95885e-14	2.36708e-13	22318	Vamp2
4721	Synaptic vesicle cycle	9.61991	2.95885e-14	2.36708e-13	20614	Snap25
4721	Synaptic vesicle cycle	9.61991	2.95885e-14	2.36708e-13	18195	Nsf
4721	Synaptic vesicle cycle	9.61991	2.95885e-14	2.36708e-13	12889	Cplx1
4721	Synaptic vesicle cycle	9.61991	2.95885e-14	2.36708e-13	12287	Cacna1b
4721	Synaptic vesicle cycle	9.61991	2.95885e-14	2.36708e-13	22348	Slc32a1
4721	Synaptic vesicle cycle	9.61991	2.95885e-14	2.36708e-13	20910	Stxbp1
4721	Synaptic vesicle cycle	9.61991	2.95885e-14	2.36708e-13	76252	Atp6v0e2
4721	Synaptic vesicle cycle	9.61991	2.95885e-14	2.36708e-13	13429	Dnm1
4721	Synaptic vesicle cycle	9.61991	2.95885e-14	2.36708e-13	19339	Rab3a
4721	Synaptic vesicle cycle	9.61991	2.95885e-14	2.36708e-13	66237	Atp6v1g2
4514	Cell adhesion molecules (CAMs)	5.57719	8.40088e-14	6.50391e-13	16401	Itga4
4514	Cell adhesion molecules (CAMs)	5.57719	8.40088e-14	6.50391e-13	16409	Itgam
4514	Cell adhesion molecules (CAMs)	5.57719	8.40088e-14	6.50391e-13	15894	Icam1
4514	Cell adhesion molecules (CAMs)	5.57719	8.40088e-14	6.50391e-13	14960	H2-Aa
4514	Cell adhesion molecules (CAMs)	5.57719	8.40088e-14	6.50391e-13	14961	H2-Ab1
4514	Cell adhesion molecules (CAMs)	5.57719	8.40088e-14	6.50391e-13	16412	Itgb1
4514	Cell adhesion molecules (CAMs)	5.57719	8.40088e-14	6.50391e-13	12504	Cd4
4514	Cell adhesion molecules (CAMs)	5.57719	8.40088e-14	6.50391e-13	14972	H2-K1
4514	Cell adhesion molecules (CAMs)	5.57719	8.40088e-14	6.50391e-13	241226	Itga8
4514	Cell adhesion molecules (CAMs)	5.57719	8.40088e-14	6.50391e-13	12805	Cntn1
4514	Cell adhesion molecules (CAMs)	5.57719	8.40088e-14	6.50391e-13	245537	Nlgn3
4514	Cell adhesion molecules (CAMs)	5.57719	8.40088e-14	6.50391e-13	102657	Cd276
4514	Cell adhesion molecules (CAMs)	5.57719	8.40088e-14	6.50391e-13	15024	H2-T10
4514	Cell adhesion molecules (CAMs)	5.57719	8.40088e-14	6.50391e-13	12562	Cdh5
4514	Cell adhesion molecules (CAMs)	5.57719	8.40088e-14	6.50391e-13	94332	Cadm3
4514	Cell adhesion molecules (CAMs)	5.57719	8.40088e-14	6.50391e-13	12483	Cd22
4514	Cell adhesion molecules (CAMs)	5.57719	8.40088e-14	6.50391e-13	12519	Cd80
4514	Cell adhesion molecules (CAMs)	5.57719	8.40088e-14	6.50391e-13	21367	Cntn2
4514	Cell adhesion molecules (CAMs)	5.57719	8.40088e-14	6.50391e-13	18190	Nrxn2
4514	Cell adhesion molecules (CAMs)	5.57719	8.40088e-14	6.50391e-13	17968	Ncam2
4514	Cell adhesion molecules (CAMs)	5.57719	8.40088e-14	6.50391e-13	272381	Lrrc4b
4514	Cell adhesion molecules (CAMs)	5.57719	8.40088e-14	6.50391e-13	16414	Itgb2
4514	Cell adhesion molecules (CAMs)	5.57719	8.40088e-14	6.50391e-13	53321	Cntnap1
4514	Cell adhesion molecules (CAMs)	5.57719	8.40088e-14	6.50391e-13	12737	Cldn1
4514	Cell adhesion molecules (CAMs)	5.57719	8.40088e-14	6.50391e-13	58235	Pvrl1
4514	Cell adhesion molecules (CAMs)	5.57719	8.40088e-14	6.50391e-13	17136	Mag
4514	Cell adhesion molecules (CAMs)	5.57719	8.40088e-14	6.50391e-13	20612	Siglec1
4514	Cell adhesion molecules (CAMs)	5.57719	8.40088e-14	6.50391e-13	19264	Ptprc
4514	Cell adhesion molecules (CAMs)	5.57719	8.40088e-14	6.50391e-13	192198	Lrrc4
4514	Cell adhesion molecules (CAMs)	5.57719	8.40088e-14	6.50391e-13	12524	Cd86
4062	Chemokine signaling pathway	5.02507	9.88928e-14	7.41696e-13	20292	Ccl11
4062	Chemokine signaling pathway	5.02507	9.88928e-14	7.41696e-13	11514	Adcy8
4062	Chemokine signaling pathway	5.02507	9.88928e-14	7.41696e-13	19354	Rac2
4062	Chemokine signaling pathway	5.02507	9.88928e-14	7.41696e-13	22324	Vav1
4062	Chemokine signaling pathway	5.02507	9.88928e-14	7.41696e-13	210044	Adcy2
4062	Chemokine signaling pathway	5.02507	9.88928e-14	7.41696e-13	18753	Prkcd
4062	Chemokine signaling pathway	5.02507	9.88928e-14	7.41696e-13	19229	Ptk2b
4062	Chemokine signaling pathway	5.02507	9.88928e-14	7.41696e-13	18762	Prkcz
4062	Chemokine signaling pathway	5.02507	9.88928e-14	7.41696e-13	215449	Rap1b
4062	Chemokine signaling pathway	5.02507	9.88928e-14	7.41696e-13	20418	Shc3
4062	Chemokine signaling pathway	5.02507	9.88928e-14	7.41696e-13	18479	Pak1
4062	Chemokine signaling pathway	5.02507	9.88928e-14	7.41696e-13	20300	Ccl25
4062	Chemokine signaling pathway	5.02507	9.88928e-14	7.41696e-13	13051	Cx3cr1
4062	Chemokine signaling pathway	5.02507	9.88928e-14	7.41696e-13	18798	Plcb4
4062	Chemokine signaling pathway	5.02507	9.88928e-14	7.41696e-13	20416	Shc1
4062	Chemokine signaling pathway	5.02507	9.88928e-14	7.41696e-13	20302	Ccl3
4062	Chemokine signaling pathway	5.02507	9.88928e-14	7.41696e-13	66102	Cxcl16
4062	Chemokine signaling pathway	5.02507	9.88928e-14	7.41696e-13	14704	Gng3
4062	Chemokine signaling pathway	5.02507	9.88928e-14	7.41696e-13	12768	Ccr1
4062	Chemokine signaling pathway	5.02507	9.88928e-14	7.41696e-13	14710	Gngt2
4062	Chemokine signaling pathway	5.02507	9.88928e-14	7.41696e-13	22376	Was
4062	Chemokine signaling pathway	5.02507	9.88928e-14	7.41696e-13	11515	Adcy9
4062	Chemokine signaling pathway	5.02507	9.88928e-14	7.41696e-13	17096	Lyn
4062	Chemokine signaling pathway	5.02507	9.88928e-14	7.41696e-13	20312	Cx3cl1
4062	Chemokine signaling pathway	5.02507	9.88928e-14	7.41696e-13	14706	Gng4
4062	Chemokine signaling pathway	5.02507	9.88928e-14	7.41696e-13	64337	Gng13
4062	Chemokine signaling pathway	5.02507	9.88928e-14	7.41696e-13	224129	Adcy5
4062	Chemokine signaling pathway	5.02507	9.88928e-14	7.41696e-13	20308	Ccl9
4062	Chemokine signaling pathway	5.02507	9.88928e-14	7.41696e-13	17969	Ncf1
4062	Chemokine signaling pathway	5.02507	9.88928e-14	7.41696e-13	20305	Ccl6
4062	Chemokine signaling pathway	5.02507	9.88928e-14	7.41696e-13	30955	Pik3cg
4062	Chemokine signaling pathway	5.02507	9.88928e-14	7.41696e-13	320207	Pik3r5
4062	Chemokine signaling pathway	5.02507	9.88928e-14	7.41696e-13	20303	Ccl4
5323	Rheumatoid arthritis	7.93643	1.19598e-13	8.69805e-13	16176	Il1b
5323	Rheumatoid arthritis	7.93643	1.19598e-13	8.69805e-13	20302	Ccl3
5323	Rheumatoid arthritis	7.93643	1.19598e-13	8.69805e-13	13039	Ctsl
5323	Rheumatoid arthritis	7.93643	1.19598e-13	8.69805e-13	16414	Itgb2
5323	Rheumatoid arthritis	7.93643	1.19598e-13	8.69805e-13	14281	Fos
5323	Rheumatoid arthritis	7.93643	1.19598e-13	8.69805e-13	13038	Ctsk
5323	Rheumatoid arthritis	7.93643	1.19598e-13	8.69805e-13	76252	Atp6v0e2
5323	Rheumatoid arthritis	7.93643	1.19598e-13	8.69805e-13	69583	Tnfsf13
5323	Rheumatoid arthritis	7.93643	1.19598e-13	8.69805e-13	17392	Mmp3
5323	Rheumatoid arthritis	7.93643	1.19598e-13	8.69805e-13	16175	Il1a
5323	Rheumatoid arthritis	7.93643	1.19598e-13	8.69805e-13	12524	Cd86
5323	Rheumatoid arthritis	7.93643	1.19598e-13	8.69805e-13	15894	Icam1
5323	Rheumatoid arthritis	7.93643	1.19598e-13	8.69805e-13	24088	Tlr2
5323	Rheumatoid arthritis	7.93643	1.19598e-13	8.69805e-13	66237	Atp6v1g2
5323	Rheumatoid arthritis	7.93643	1.19598e-13	8.69805e-13	21803	Tgfb1
5323	Rheumatoid arthritis	7.93643	1.19598e-13	8.69805e-13	12519	Cd80
5323	Rheumatoid arthritis	7.93643	1.19598e-13	8.69805e-13	14960	H2-Aa
5323	Rheumatoid arthritis	7.93643	1.19598e-13	8.69805e-13	11600	Angpt1
5323	Rheumatoid arthritis	7.93643	1.19598e-13	8.69805e-13	14961	H2-Ab1
5323	Rheumatoid arthritis	7.93643	1.19598e-13	8.69805e-13	27060	Tcirg1
5323	Rheumatoid arthritis	7.93643	1.19598e-13	8.69805e-13	242341	Atp6v0d2
5323	Rheumatoid arthritis	7.93643	1.19598e-13	8.69805e-13	11433	Acp5
5145	Toxoplasmosis	6.70414	1.49239e-13	1.05345e-12	11796	Birc3
5145	Toxoplasmosis	6.70414	1.49239e-13	1.05345e-12	16777	Lamb1
5145	Toxoplasmosis	6.70414	1.49239e-13	1.05345e-12	12370	Casp8
5145	Toxoplasmosis	6.70414	1.49239e-13	1.05345e-12	14681	Gnao1
5145	Toxoplasmosis	6.70414	1.49239e-13	1.05345e-12	16835	Ldlr
5145	Toxoplasmosis	6.70414	1.49239e-13	1.05345e-12	16773	Lama2
5145	Toxoplasmosis	6.70414	1.49239e-13	1.05345e-12	16155	Il10rb
5145	Toxoplasmosis	6.70414	1.49239e-13	1.05345e-12	16775	Lama4
5145	Toxoplasmosis	6.70414	1.49239e-13	1.05345e-12	14960	H2-Aa
5145	Toxoplasmosis	6.70414	1.49239e-13	1.05345e-12	14961	H2-Ab1
5145	Toxoplasmosis	6.70414	1.49239e-13	1.05345e-12	16412	Itgb1
5145	Toxoplasmosis	6.70414	1.49239e-13	1.05345e-12	15979	Ifngr1
5145	Toxoplasmosis	6.70414	1.49239e-13	1.05345e-12	266632	Irak4
5145	Toxoplasmosis	6.70414	1.49239e-13	1.05345e-12	30955	Pik3cg
5145	Toxoplasmosis	6.70414	1.49239e-13	1.05345e-12	17874	Myd88
5145	Toxoplasmosis	6.70414	1.49239e-13	1.05345e-12	16154	Il10ra
5145	Toxoplasmosis	6.70414	1.49239e-13	1.05345e-12	26420	Mapk9
5145	Toxoplasmosis	6.70414	1.49239e-13	1.05345e-12	24088	Tlr2
5145	Toxoplasmosis	6.70414	1.49239e-13	1.05345e-12	320207	Pik3r5
5145	Toxoplasmosis	6.70414	1.49239e-13	1.05345e-12	19094	Mapk11
5145	Toxoplasmosis	6.70414	1.49239e-13	1.05345e-12	21803	Tgfb1
5145	Toxoplasmosis	6.70414	1.49239e-13	1.05345e-12	21937	Tnfrsf1a
5145	Toxoplasmosis	6.70414	1.49239e-13	1.05345e-12	15944	Irgm1
5145	Toxoplasmosis	6.70414	1.49239e-13	1.05345e-12	26414	Mapk10
5145	Toxoplasmosis	6.70414	1.49239e-13	1.05345e-12	226519	Lamc1
5132	Salmonella infection	8.05515	3.3156e-13	2.27356e-12	18645	Pfn2
5132	Salmonella infection	8.05515	3.3156e-13	2.27356e-12	19094	Mapk11
5132	Salmonella infection	8.05515	3.3156e-13	2.27356e-12	11867	Arpc1b
5132	Salmonella infection	8.05515	3.3156e-13	2.27356e-12	22376	Was
5132	Salmonella infection	8.05515	3.3156e-13	2.27356e-12	16803	Lbp
5132	Salmonella infection	8.05515	3.3156e-13	2.27356e-12	17874	Myd88
5132	Salmonella infection	8.05515	3.3156e-13	2.27356e-12	16176	Il1b
5132	Salmonella infection	8.05515	3.3156e-13	2.27356e-12	13426	Dync1i1
5132	Salmonella infection	8.05515	3.3156e-13	2.27356e-12	226421	5430435G22Rik
5132	Salmonella infection	8.05515	3.3156e-13	2.27356e-12	20302	Ccl3
5132	Salmonella infection	8.05515	3.3156e-13	2.27356e-12	12475	Cd14
5132	Salmonella infection	8.05515	3.3156e-13	2.27356e-12	20303	Ccl4
5132	Salmonella infection	8.05515	3.3156e-13	2.27356e-12	16594	Klc2
5132	Salmonella infection	8.05515	3.3156e-13	2.27356e-12	16175	Il1a
5132	Salmonella infection	8.05515	3.3156e-13	2.27356e-12	26414	Mapk10
5132	Salmonella infection	8.05515	3.3156e-13	2.27356e-12	66824	Pycard
5132	Salmonella infection	8.05515	3.3156e-13	2.27356e-12	14281	Fos
5132	Salmonella infection	8.05515	3.3156e-13	2.27356e-12	26420	Mapk9
5132	Salmonella infection	8.05515	3.3156e-13	2.27356e-12	67771	Arpc5
5132	Salmonella infection	8.05515	3.3156e-13	2.27356e-12	56378	Arpc3
5132	Salmonella infection	8.05515	3.3156e-13	2.27356e-12	15979	Ifngr1
5133	Pertussis	8.18992	9.13545e-13	6.0903e-12	12263	C2
5133	Pertussis	8.18992	9.13545e-13	6.0903e-12	26414	Mapk10
5133	Pertussis	8.18992	9.13545e-13	6.0903e-12	16412	Itgb1
5133	Pertussis	8.18992	9.13545e-13	6.0903e-12	12369	Casp7
5133	Pertussis	8.18992	9.13545e-13	6.0903e-12	16414	Itgb2
5133	Pertussis	8.18992	9.13545e-13	6.0903e-12	16409	Itgam
5133	Pertussis	8.18992	9.13545e-13	6.0903e-12	19094	Mapk11
5133	Pertussis	8.18992	9.13545e-13	6.0903e-12	12475	Cd14
5133	Pertussis	8.18992	9.13545e-13	6.0903e-12	17874	Myd88
5133	Pertussis	8.18992	9.13545e-13	6.0903e-12	266632	Irak4
5133	Pertussis	8.18992	9.13545e-13	6.0903e-12	26420	Mapk9
5133	Pertussis	8.18992	9.13545e-13	6.0903e-12	12260	C1qb
5133	Pertussis	8.18992	9.13545e-13	6.0903e-12	14281	Fos
5133	Pertussis	8.18992	9.13545e-13	6.0903e-12	12268	C4b
5133	Pertussis	8.18992	9.13545e-13	6.0903e-12	66824	Pycard
5133	Pertussis	8.18992	9.13545e-13	6.0903e-12	12259	C1qa
5133	Pertussis	8.18992	9.13545e-13	6.0903e-12	16362	Irf1
5133	Pertussis	8.18992	9.13545e-13	6.0903e-12	16176	Il1b
5133	Pertussis	8.18992	9.13545e-13	6.0903e-12	15900	Irf8
5133	Pertussis	8.18992	9.13545e-13	6.0903e-12	16175	Il1a
4360	Axon guidance	5.92384	1.02785e-12	6.6671e-12	140570	Plxnb2
4360	Axon guidance	5.92384	1.02785e-12	6.6671e-12	270190	Ephb1
4360	Axon guidance	5.92384	1.02785e-12	6.6671e-12	13837	Epha3
4360	Axon guidance	5.92384	1.02785e-12	6.6671e-12	268902	Robo2
4360	Axon guidance	5.92384	1.02785e-12	6.6671e-12	65254	Dpysl5
4360	Axon guidance	5.92384	1.02785e-12	6.6671e-12	259302	Srgap3
4360	Axon guidance	5.92384	1.02785e-12	6.6671e-12	13840	Epha6
4360	Axon guidance	5.92384	1.02785e-12	6.6671e-12	18186	Nrp1
4360	Axon guidance	5.92384	1.02785e-12	6.6671e-12	243743	Plxna4
4360	Axon guidance	5.92384	1.02785e-12	6.6671e-12	210801	Unc5d
4360	Axon guidance	5.92384	1.02785e-12	6.6671e-12	16412	Itgb1
4360	Axon guidance	5.92384	1.02785e-12	6.6671e-12	54712	Plxnc1
4360	Axon guidance	5.92384	1.02785e-12	6.6671e-12	16885	Limk1
4360	Axon guidance	5.92384	1.02785e-12	6.6671e-12	17295	Met
4360	Axon guidance	5.92384	1.02785e-12	6.6671e-12	13176	Dcc
4360	Axon guidance	5.92384	1.02785e-12	6.6671e-12	108151	Sema3d
4360	Axon guidance	5.92384	1.02785e-12	6.6671e-12	13643	Efnb3
4360	Axon guidance	5.92384	1.02785e-12	6.6671e-12	192198	Lrrc4
4360	Axon guidance	5.92384	1.02785e-12	6.6671e-12	231148	Ablim2
4360	Axon guidance	5.92384	1.02785e-12	6.6671e-12	18479	Pak1
4360	Axon guidance	5.92384	1.02785e-12	6.6671e-12	13839	Epha5
4360	Axon guidance	5.92384	1.02785e-12	6.6671e-12	107448	Unc5a
4360	Axon guidance	5.92384	1.02785e-12	6.6671e-12	20358	Sema6a
4360	Axon guidance	5.92384	1.02785e-12	6.6671e-12	18481	Pak3
4360	Axon guidance	5.92384	1.02785e-12	6.6671e-12	20562	Slit1
4360	Axon guidance	5.92384	1.02785e-12	6.6671e-12	19354	Rac2
4911	Insulin secretion	7.23133	3.33526e-12	2.10648e-11	20191	Ryr2
4911	Insulin secretion	7.23133	3.33526e-12	2.10648e-11	11931	Atp1b1
4911	Insulin secretion	7.23133	3.33526e-12	2.10648e-11	12322	Camk2a
4911	Insulin secretion	7.23133	3.33526e-12	2.10648e-11	11514	Adcy8
4911	Insulin secretion	7.23133	3.33526e-12	2.10648e-11	11517	Adcyap1r1
4911	Insulin secretion	7.23133	3.33526e-12	2.10648e-11	16514	Kcnj11
4911	Insulin secretion	7.23133	3.33526e-12	2.10648e-11	18798	Plcb4
4911	Insulin secretion	7.23133	3.33526e-12	2.10648e-11	116838	Rims2
4911	Insulin secretion	7.23133	3.33526e-12	2.10648e-11	22318	Vamp2
4911	Insulin secretion	7.23133	3.33526e-12	2.10648e-11	11515	Adcy9
4911	Insulin secretion	7.23133	3.33526e-12	2.10648e-11	19339	Rab3a
4911	Insulin secretion	7.23133	3.33526e-12	2.10648e-11	12323	Camk2b
4911	Insulin secretion	7.23133	3.33526e-12	2.10648e-11	12325	Camk2g
4911	Insulin secretion	7.23133	3.33526e-12	2.10648e-11	210044	Adcy2
4911	Insulin secretion	7.23133	3.33526e-12	2.10648e-11	20614	Snap25
4911	Insulin secretion	7.23133	3.33526e-12	2.10648e-11	26875	Pclo
4911	Insulin secretion	7.23133	3.33526e-12	2.10648e-11	14652	Glp1r
4911	Insulin secretion	7.23133	3.33526e-12	2.10648e-11	16531	Kcnma1
4911	Insulin secretion	7.23133	3.33526e-12	2.10648e-11	232975	Atp1a3
4911	Insulin secretion	7.23133	3.33526e-12	2.10648e-11	224129	Adcy5
4911	Insulin secretion	7.23133	3.33526e-12	2.10648e-11	26427	Creb3l1
4210	Apoptosis	7.21493	1.21539e-11	7.4793e-11	12368	Casp6
4210	Apoptosis	7.21493	1.21539e-11	7.4793e-11	30955	Pik3cg
4210	Apoptosis	7.21493	1.21539e-11	7.4793e-11	11796	Birc3
4210	Apoptosis	7.21493	1.21539e-11	7.4793e-11	21937	Tnfrsf1a
4210	Apoptosis	7.21493	1.21539e-11	7.4793e-11	22035	Tnfsf10
4210	Apoptosis	7.21493	1.21539e-11	7.4793e-11	12364	Casp12
4210	Apoptosis	7.21493	1.21539e-11	7.4793e-11	12369	Casp7
4210	Apoptosis	7.21493	1.21539e-11	7.4793e-11	16175	Il1a
4210	Apoptosis	7.21493	1.21539e-11	7.4793e-11	17874	Myd88
4210	Apoptosis	7.21493	1.21539e-11	7.4793e-11	12370	Casp8
4210	Apoptosis	7.21493	1.21539e-11	7.4793e-11	266632	Irak4
4210	Apoptosis	7.21493	1.21539e-11	7.4793e-11	16177	Il1r1
4210	Apoptosis	7.21493	1.21539e-11	7.4793e-11	73914	Irak3
4210	Apoptosis	7.21493	1.21539e-11	7.4793e-11	12633	Cflar
4210	Apoptosis	7.21493	1.21539e-11	7.4793e-11	16176	Il1b
4210	Apoptosis	7.21493	1.21539e-11	7.4793e-11	19085	Prkar1b
4210	Apoptosis	7.21493	1.21539e-11	7.4793e-11	12983	Csf2rb
4210	Apoptosis	7.21493	1.21539e-11	7.4793e-11	12984	Csf2rb2
4210	Apoptosis	7.21493	1.21539e-11	7.4793e-11	19766	Ripk1
4210	Apoptosis	7.21493	1.21539e-11	7.4793e-11	320207	Pik3r5
5164	Influenza A	4.933	1.39959e-11	8.39752e-11	30955	Pik3cg
5164	Influenza A	4.933	1.39959e-11	8.39752e-11	19094	Mapk11
5164	Influenza A	4.933	1.39959e-11	8.39752e-11	16391	Irf9
5164	Influenza A	4.933	1.39959e-11	8.39752e-11	71586	Ifih1
5164	Influenza A	4.933	1.39959e-11	8.39752e-11	56489	Ikbke
5164	Influenza A	4.933	1.39959e-11	8.39752e-11	26420	Mapk9
5164	Influenza A	4.933	1.39959e-11	8.39752e-11	16176	Il1b
5164	Influenza A	4.933	1.39959e-11	8.39752e-11	170743	Tlr7
5164	Influenza A	4.933	1.39959e-11	8.39752e-11	18550	Furin
5164	Influenza A	4.933	1.39959e-11	8.39752e-11	66824	Pycard
5164	Influenza A	4.933	1.39959e-11	8.39752e-11	16175	Il1a
5164	Influenza A	4.933	1.39959e-11	8.39752e-11	320207	Pik3r5
5164	Influenza A	4.933	1.39959e-11	8.39752e-11	266632	Irak4
5164	Influenza A	4.933	1.39959e-11	8.39752e-11	17874	Myd88
5164	Influenza A	4.933	1.39959e-11	8.39752e-11	26414	Mapk10
5164	Influenza A	4.933	1.39959e-11	8.39752e-11	19106	Eif2ak2
5164	Influenza A	4.933	1.39959e-11	8.39752e-11	26398	Map2k4
5164	Influenza A	4.933	1.39959e-11	8.39752e-11	77125	Il33
5164	Influenza A	4.933	1.39959e-11	8.39752e-11	12702	Socs3
5164	Influenza A	4.933	1.39959e-11	8.39752e-11	15976	Ifnar2
5164	Influenza A	4.933	1.39959e-11	8.39752e-11	15894	Icam1
5164	Influenza A	4.933	1.39959e-11	8.39752e-11	230073	Ddx58
5164	Influenza A	4.933	1.39959e-11	8.39752e-11	22035	Tnfsf10
5164	Influenza A	4.933	1.39959e-11	8.39752e-11	24014	Rnasel
5164	Influenza A	4.933	1.39959e-11	8.39752e-11	15979	Ifngr1
5164	Influenza A	4.933	1.39959e-11	8.39752e-11	21937	Tnfrsf1a
5164	Influenza A	4.933	1.39959e-11	8.39752e-11	14961	H2-Ab1
5164	Influenza A	4.933	1.39959e-11	8.39752e-11	14960	H2-Aa
4670	Leukocyte transendothelial migration	5.76002	4.41541e-11	2.58463e-10	16414	Itgb2
4670	Leukocyte transendothelial migration	5.76002	4.41541e-11	2.58463e-10	16412	Itgb1
4670	Leukocyte transendothelial migration	5.76002	4.41541e-11	2.58463e-10	12737	Cldn1
4670	Leukocyte transendothelial migration	5.76002	4.41541e-11	2.58463e-10	12562	Cdh5
4670	Leukocyte transendothelial migration	5.76002	4.41541e-11	2.58463e-10	17969	Ncf1
4670	Leukocyte transendothelial migration	5.76002	4.41541e-11	2.58463e-10	17698	Msn
4670	Leukocyte transendothelial migration	5.76002	4.41541e-11	2.58463e-10	17972	Ncf4
4670	Leukocyte transendothelial migration	5.76002	4.41541e-11	2.58463e-10	16401	Itga4
4670	Leukocyte transendothelial migration	5.76002	4.41541e-11	2.58463e-10	15894	Icam1
4670	Leukocyte transendothelial migration	5.76002	4.41541e-11	2.58463e-10	19094	Mapk11
4670	Leukocyte transendothelial migration	5.76002	4.41541e-11	2.58463e-10	22350	Ezr
4670	Leukocyte transendothelial migration	5.76002	4.41541e-11	2.58463e-10	17390	Mmp2
4670	Leukocyte transendothelial migration	5.76002	4.41541e-11	2.58463e-10	22330	Vcl
4670	Leukocyte transendothelial migration	5.76002	4.41541e-11	2.58463e-10	19229	Ptk2b
4670	Leukocyte transendothelial migration	5.76002	4.41541e-11	2.58463e-10	13057	Cyba
4670	Leukocyte transendothelial migration	5.76002	4.41541e-11	2.58463e-10	16409	Itgam
4670	Leukocyte transendothelial migration	5.76002	4.41541e-11	2.58463e-10	19354	Rac2
4670	Leukocyte transendothelial migration	5.76002	4.41541e-11	2.58463e-10	13058	Cybb
4670	Leukocyte transendothelial migration	5.76002	4.41541e-11	2.58463e-10	215449	Rap1b
4670	Leukocyte transendothelial migration	5.76002	4.41541e-11	2.58463e-10	234779	Plcg2
4670	Leukocyte transendothelial migration	5.76002	4.41541e-11	2.58463e-10	30955	Pik3cg
4670	Leukocyte transendothelial migration	5.76002	4.41541e-11	2.58463e-10	22324	Vav1
4670	Leukocyte transendothelial migration	5.76002	4.41541e-11	2.58463e-10	320207	Pik3r5
5414	Dilated cardiomyopathy	6.73394	4.77832e-11	2.73047e-10	12296	Cacnb2
5414	Dilated cardiomyopathy	6.73394	4.77832e-11	2.73047e-10	224129	Adcy5
5414	Dilated cardiomyopathy	6.73394	4.77832e-11	2.73047e-10	21803	Tgfb1
5414	Dilated cardiomyopathy	6.73394	4.77832e-11	2.73047e-10	241226	Itga8
5414	Dilated cardiomyopathy	6.73394	4.77832e-11	2.73047e-10	210044	Adcy2
5414	Dilated cardiomyopathy	6.73394	4.77832e-11	2.73047e-10	319480	Itga11
5414	Dilated cardiomyopathy	6.73394	4.77832e-11	2.73047e-10	11515	Adcy9
5414	Dilated cardiomyopathy	6.73394	4.77832e-11	2.73047e-10	16401	Itga4
5414	Dilated cardiomyopathy	6.73394	4.77832e-11	2.73047e-10	12300	Cacng2
5414	Dilated cardiomyopathy	6.73394	4.77832e-11	2.73047e-10	20541	Slc8a1
5414	Dilated cardiomyopathy	6.73394	4.77832e-11	2.73047e-10	20191	Ryr2
5414	Dilated cardiomyopathy	6.73394	4.77832e-11	2.73047e-10	12298	Cacnb4
5414	Dilated cardiomyopathy	6.73394	4.77832e-11	2.73047e-10	56808	Cacna2d2
5414	Dilated cardiomyopathy	6.73394	4.77832e-11	2.73047e-10	16905	Lmna
5414	Dilated cardiomyopathy	6.73394	4.77832e-11	2.73047e-10	11514	Adcy8
5414	Dilated cardiomyopathy	6.73394	4.77832e-11	2.73047e-10	16419	Itgb5
5414	Dilated cardiomyopathy	6.73394	4.77832e-11	2.73047e-10	16773	Lama2
5414	Dilated cardiomyopathy	6.73394	4.77832e-11	2.73047e-10	140723	Cacng5
5414	Dilated cardiomyopathy	6.73394	4.77832e-11	2.73047e-10	16412	Itgb1
5414	Dilated cardiomyopathy	6.73394	4.77832e-11	2.73047e-10	16000	Igf1
4064	NF-kappa B signaling pathway	6.17822	8.51404e-11	4.75202e-10	15894	Icam1
4064	NF-kappa B signaling pathway	6.17822	8.51404e-11	4.75202e-10	20963	Syk
4064	NF-kappa B signaling pathway	6.17822	8.51404e-11	4.75202e-10	16176	Il1b
4064	NF-kappa B signaling pathway	6.17822	8.51404e-11	4.75202e-10	21937	Tnfrsf1a
4064	NF-kappa B signaling pathway	6.17822	8.51404e-11	4.75202e-10	12475	Cd14
4064	NF-kappa B signaling pathway	6.17822	8.51404e-11	4.75202e-10	12229	Btk
4064	NF-kappa B signaling pathway	6.17822	8.51404e-11	4.75202e-10	234779	Plcg2
4064	NF-kappa B signaling pathway	6.17822	8.51404e-11	4.75202e-10	12633	Cflar
4064	NF-kappa B signaling pathway	6.17822	8.51404e-11	4.75202e-10	22031	Traf3
4064	NF-kappa B signaling pathway	6.17822	8.51404e-11	4.75202e-10	20303	Ccl4
4064	NF-kappa B signaling pathway	6.17822	8.51404e-11	4.75202e-10	230073	Ddx58
4064	NF-kappa B signaling pathway	6.17822	8.51404e-11	4.75202e-10	19766	Ripk1
4064	NF-kappa B signaling pathway	6.17822	8.51404e-11	4.75202e-10	19225	Ptgs2
4064	NF-kappa B signaling pathway	6.17822	8.51404e-11	4.75202e-10	266632	Irak4
4064	NF-kappa B signaling pathway	6.17822	8.51404e-11	4.75202e-10	18792	Plau
4064	NF-kappa B signaling pathway	6.17822	8.51404e-11	4.75202e-10	16177	Il1r1
4064	NF-kappa B signaling pathway	6.17822	8.51404e-11	4.75202e-10	17060	Blnk
4064	NF-kappa B signaling pathway	6.17822	8.51404e-11	4.75202e-10	11796	Birc3
4064	NF-kappa B signaling pathway	6.17822	8.51404e-11	4.75202e-10	17096	Lyn
4064	NF-kappa B signaling pathway	6.17822	8.51404e-11	4.75202e-10	17874	Myd88
4064	NF-kappa B signaling pathway	6.17822	8.51404e-11	4.75202e-10	16803	Lbp
5168	Herpes simplex infection	4.16483	4.09751e-10	2.23501e-09	14281	Fos
5168	Herpes simplex infection	4.16483	4.09751e-10	2.23501e-09	20684	Sp100
5168	Herpes simplex infection	4.16483	4.09751e-10	2.23501e-09	19106	Eif2ak2
5168	Herpes simplex infection	4.16483	4.09751e-10	2.23501e-09	12566	Cdk2
5168	Herpes simplex infection	4.16483	4.09751e-10	2.23501e-09	15976	Ifnar2
5168	Herpes simplex infection	4.16483	4.09751e-10	2.23501e-09	12370	Casp8
5168	Herpes simplex infection	4.16483	4.09751e-10	2.23501e-09	17874	Myd88
5168	Herpes simplex infection	4.16483	4.09751e-10	2.23501e-09	15979	Ifngr1
5168	Herpes simplex infection	4.16483	4.09751e-10	2.23501e-09	12534	Cdk1
5168	Herpes simplex infection	4.16483	4.09751e-10	2.23501e-09	21354	Tap1
5168	Herpes simplex infection	4.16483	4.09751e-10	2.23501e-09	22031	Traf3
5168	Herpes simplex infection	4.16483	4.09751e-10	2.23501e-09	14960	H2-Aa
5168	Herpes simplex infection	4.16483	4.09751e-10	2.23501e-09	16176	Il1b
5168	Herpes simplex infection	4.16483	4.09751e-10	2.23501e-09	15957	Ifit1
5168	Herpes simplex infection	4.16483	4.09751e-10	2.23501e-09	56489	Ikbke
5168	Herpes simplex infection	4.16483	4.09751e-10	2.23501e-09	230073	Ddx58
5168	Herpes simplex infection	4.16483	4.09751e-10	2.23501e-09	14961	H2-Ab1
5168	Herpes simplex infection	4.16483	4.09751e-10	2.23501e-09	231805	Pilra
5168	Herpes simplex infection	4.16483	4.09751e-10	2.23501e-09	58235	Pvrl1
5168	Herpes simplex infection	4.16483	4.09751e-10	2.23501e-09	15024	H2-T10
5168	Herpes simplex infection	4.16483	4.09751e-10	2.23501e-09	21937	Tnfrsf1a
5168	Herpes simplex infection	4.16483	4.09751e-10	2.23501e-09	26414	Mapk10
5168	Herpes simplex infection	4.16483	4.09751e-10	2.23501e-09	16391	Irf9
5168	Herpes simplex infection	4.16483	4.09751e-10	2.23501e-09	71586	Ifih1
5168	Herpes simplex infection	4.16483	4.09751e-10	2.23501e-09	12702	Socs3
5168	Herpes simplex infection	4.16483	4.09751e-10	2.23501e-09	24088	Tlr2
5168	Herpes simplex infection	4.16483	4.09751e-10	2.23501e-09	14972	H2-K1
5168	Herpes simplex infection	4.16483	4.09751e-10	2.23501e-09	24014	Rnasel
5168	Herpes simplex infection	4.16483	4.09751e-10	2.23501e-09	26420	Mapk9
4650	Natural killer cell mediated cytotoxicity	5.33328	5.91567e-10	3.12482e-09	19229	Ptk2b
4650	Natural killer cell mediated cytotoxicity	5.33328	5.91567e-10	3.12482e-09	14972	H2-K1
4650	Natural killer cell mediated cytotoxicity	5.33328	5.91567e-10	3.12482e-09	12506	Cd48
4650	Natural killer cell mediated cytotoxicity	5.33328	5.91567e-10	3.12482e-09	18479	Pak1
4650	Natural killer cell mediated cytotoxicity	5.33328	5.91567e-10	3.12482e-09	30955	Pik3cg
4650	Natural killer cell mediated cytotoxicity	5.33328	5.91567e-10	3.12482e-09	15979	Ifngr1
4650	Natural killer cell mediated cytotoxicity	5.33328	5.91567e-10	3.12482e-09	20416	Shc1
4650	Natural killer cell mediated cytotoxicity	5.33328	5.91567e-10	3.12482e-09	19354	Rac2
4650	Natural killer cell mediated cytotoxicity	5.33328	5.91567e-10	3.12482e-09	16414	Itgb2
4650	Natural killer cell mediated cytotoxicity	5.33328	5.91567e-10	3.12482e-09	22324	Vav1
4650	Natural killer cell mediated cytotoxicity	5.33328	5.91567e-10	3.12482e-09	320207	Pik3r5
4650	Natural killer cell mediated cytotoxicity	5.33328	5.91567e-10	3.12482e-09	15976	Ifnar2
4650	Natural killer cell mediated cytotoxicity	5.33328	5.91567e-10	3.12482e-09	15894	Icam1
4650	Natural killer cell mediated cytotoxicity	5.33328	5.91567e-10	3.12482e-09	24055	Sh3bp2
4650	Natural killer cell mediated cytotoxicity	5.33328	5.91567e-10	3.12482e-09	22035	Tnfsf10
4650	Natural killer cell mediated cytotoxicity	5.33328	5.91567e-10	3.12482e-09	16822	Lcp2
4650	Natural killer cell mediated cytotoxicity	5.33328	5.91567e-10	3.12482e-09	234779	Plcg2
4650	Natural killer cell mediated cytotoxicity	5.33328	5.91567e-10	3.12482e-09	15170	Ptpn6
4650	Natural killer cell mediated cytotoxicity	5.33328	5.91567e-10	3.12482e-09	22177	Tyrobp
4650	Natural killer cell mediated cytotoxicity	5.33328	5.91567e-10	3.12482e-09	20418	Shc3
4650	Natural killer cell mediated cytotoxicity	5.33328	5.91567e-10	3.12482e-09	20963	Syk
4650	Natural killer cell mediated cytotoxicity	5.33328	5.91567e-10	3.12482e-09	14127	Fcer1g
5161	Hepatitis B	4.88097	5.98925e-10	3.12482e-09	26420	Mapk9
5161	Hepatitis B	4.88097	5.98925e-10	3.12482e-09	26398	Map2k4
5161	Hepatitis B	4.88097	5.98925e-10	3.12482e-09	26414	Mapk10
5161	Hepatitis B	4.88097	5.98925e-10	3.12482e-09	24088	Tlr2
5161	Hepatitis B	4.88097	5.98925e-10	3.12482e-09	20852	Stat6
5161	Hepatitis B	4.88097	5.98925e-10	3.12482e-09	17869	Myc
5161	Hepatitis B	4.88097	5.98925e-10	3.12482e-09	12571	Cdk6
5161	Hepatitis B	4.88097	5.98925e-10	3.12482e-09	230073	Ddx58
5161	Hepatitis B	4.88097	5.98925e-10	3.12482e-09	56489	Ikbke
5161	Hepatitis B	4.88097	5.98925e-10	3.12482e-09	12370	Casp8
5161	Hepatitis B	4.88097	5.98925e-10	3.12482e-09	26427	Creb3l1
5161	Hepatitis B	4.88097	5.98925e-10	3.12482e-09	12566	Cdk2
5161	Hepatitis B	4.88097	5.98925e-10	3.12482e-09	21803	Tgfb1
5161	Hepatitis B	4.88097	5.98925e-10	3.12482e-09	71586	Ifih1
5161	Hepatitis B	4.88097	5.98925e-10	3.12482e-09	14281	Fos
5161	Hepatitis B	4.88097	5.98925e-10	3.12482e-09	21812	Tgfbr1
5161	Hepatitis B	4.88097	5.98925e-10	3.12482e-09	19229	Ptk2b
5161	Hepatitis B	4.88097	5.98925e-10	3.12482e-09	320207	Pik3r5
5161	Hepatitis B	4.88097	5.98925e-10	3.12482e-09	11799	Birc5
5161	Hepatitis B	4.88097	5.98925e-10	3.12482e-09	15530	Hspg2
5161	Hepatitis B	4.88097	5.98925e-10	3.12482e-09	30955	Pik3cg
5161	Hepatitis B	4.88097	5.98925e-10	3.12482e-09	17874	Myd88
5161	Hepatitis B	4.88097	5.98925e-10	3.12482e-09	12364	Casp12
5161	Hepatitis B	4.88097	5.98925e-10	3.12482e-09	13654	Egr2
5014	Amyotrophic lateral sclerosis (ALS)	8.26438	7.79438e-10	3.98011e-09	14799	Gria1
5014	Amyotrophic lateral sclerosis (ALS)	8.26438	7.79438e-10	3.98011e-09	14775	Gpx1
5014	Amyotrophic lateral sclerosis (ALS)	8.26438	7.79438e-10	3.98011e-09	14812	Grin2b
5014	Amyotrophic lateral sclerosis (ALS)	8.26438	7.79438e-10	3.98011e-09	380684	Nefh
5014	Amyotrophic lateral sclerosis (ALS)	8.26438	7.79438e-10	3.98011e-09	18039	Nefl
5014	Amyotrophic lateral sclerosis (ALS)	8.26438	7.79438e-10	3.98011e-09	21938	Tnfrsf1b
5014	Amyotrophic lateral sclerosis (ALS)	8.26438	7.79438e-10	3.98011e-09	14800	Gria2
5014	Amyotrophic lateral sclerosis (ALS)	8.26438	7.79438e-10	3.98011e-09	14810	Grin1
5014	Amyotrophic lateral sclerosis (ALS)	8.26438	7.79438e-10	3.98011e-09	18040	Nefm
5014	Amyotrophic lateral sclerosis (ALS)	8.26438	7.79438e-10	3.98011e-09	19094	Mapk11
5014	Amyotrophic lateral sclerosis (ALS)	8.26438	7.79438e-10	3.98011e-09	14811	Grin2a
5014	Amyotrophic lateral sclerosis (ALS)	8.26438	7.79438e-10	3.98011e-09	12364	Casp12
5014	Amyotrophic lateral sclerosis (ALS)	8.26438	7.79438e-10	3.98011e-09	21937	Tnfrsf1a
5014	Amyotrophic lateral sclerosis (ALS)	8.26438	7.79438e-10	3.98011e-09	18125	Nos1
5014	Amyotrophic lateral sclerosis (ALS)	8.26438	7.79438e-10	3.98011e-09	19132	Prph
5166	HTLV-I infection	3.55273	8.55614e-10	4.27807e-09	21812	Tgfbr1
5166	HTLV-I infection	3.55273	8.55614e-10	4.27807e-09	26420	Mapk9
5166	HTLV-I infection	3.55273	8.55614e-10	4.27807e-09	21813	Tgfbr2
5166	HTLV-I infection	3.55273	8.55614e-10	4.27807e-09	14961	H2-Ab1
5166	HTLV-I infection	3.55273	8.55614e-10	4.27807e-09	21803	Tgfb1
5166	HTLV-I infection	3.55273	8.55614e-10	4.27807e-09	26406	Map3k3
5166	HTLV-I infection	3.55273	8.55614e-10	4.27807e-09	11514	Adcy8
5166	HTLV-I infection	3.55273	8.55614e-10	4.27807e-09	14960	H2-Aa
5166	HTLV-I infection	3.55273	8.55614e-10	4.27807e-09	21937	Tnfrsf1a
5166	HTLV-I infection	3.55273	8.55614e-10	4.27807e-09	20375	Sfpi1
5166	HTLV-I infection	3.55273	8.55614e-10	4.27807e-09	23805	Apc2
5166	HTLV-I infection	3.55273	8.55614e-10	4.27807e-09	15894	Icam1
5166	HTLV-I infection	3.55273	8.55614e-10	4.27807e-09	21894	Tln1
5166	HTLV-I infection	3.55273	8.55614e-10	4.27807e-09	210044	Adcy2
5166	HTLV-I infection	3.55273	8.55614e-10	4.27807e-09	15024	H2-T10
5166	HTLV-I infection	3.55273	8.55614e-10	4.27807e-09	14281	Fos
5166	HTLV-I infection	3.55273	8.55614e-10	4.27807e-09	13654	Egr2
5166	HTLV-I infection	3.55273	8.55614e-10	4.27807e-09	30955	Pik3cg
5166	HTLV-I infection	3.55273	8.55614e-10	4.27807e-09	18186	Nrp1
5166	HTLV-I infection	3.55273	8.55614e-10	4.27807e-09	26414	Mapk10
5166	HTLV-I infection	3.55273	8.55614e-10	4.27807e-09	12257	Tspo
5166	HTLV-I infection	3.55273	8.55614e-10	4.27807e-09	18595	Pdgfra
5166	HTLV-I infection	3.55273	8.55614e-10	4.27807e-09	18596	Pdgfrb
5166	HTLV-I infection	3.55273	8.55614e-10	4.27807e-09	11515	Adcy9
5166	HTLV-I infection	3.55273	8.55614e-10	4.27807e-09	224129	Adcy5
5166	HTLV-I infection	3.55273	8.55614e-10	4.27807e-09	14972	H2-K1
5166	HTLV-I infection	3.55273	8.55614e-10	4.27807e-09	11908	Atf1
5166	HTLV-I infection	3.55273	8.55614e-10	4.27807e-09	17869	Myc
5166	HTLV-I infection	3.55273	8.55614e-10	4.27807e-09	11910	Atf3
5166	HTLV-I infection	3.55273	8.55614e-10	4.27807e-09	320207	Pik3r5
5166	HTLV-I infection	3.55273	8.55614e-10	4.27807e-09	16177	Il1r1
5166	HTLV-I infection	3.55273	8.55614e-10	4.27807e-09	16186	Il2rg
5166	HTLV-I infection	3.55273	8.55614e-10	4.27807e-09	26398	Map2k4
5166	HTLV-I infection	3.55273	8.55614e-10	4.27807e-09	16414	Itgb2
4970	Salivary secretion	6.69021	1.82789e-09	8.95294e-09	11515	Adcy9
4970	Salivary secretion	6.69021	1.82789e-09	8.95294e-09	11931	Atp1b1
4970	Salivary secretion	6.69021	1.82789e-09	8.95294e-09	11514	Adcy8
4970	Salivary secretion	6.69021	1.82789e-09	8.95294e-09	320707	Atp2b3
4970	Salivary secretion	6.69021	1.82789e-09	8.95294e-09	210044	Adcy2
4970	Salivary secretion	6.69021	1.82789e-09	8.95294e-09	232975	Atp1a3
4970	Salivary secretion	6.69021	1.82789e-09	8.95294e-09	18798	Plcb4
4970	Salivary secretion	6.69021	1.82789e-09	8.95294e-09	224129	Adcy5
4970	Salivary secretion	6.69021	1.82789e-09	8.95294e-09	11549	Adra1a
4970	Salivary secretion	6.69021	1.82789e-09	8.95294e-09	18125	Nos1
4970	Salivary secretion	6.69021	1.82789e-09	8.95294e-09	11941	Atp2b2
4970	Salivary secretion	6.69021	1.82789e-09	8.95294e-09	17110	Lyz1
4970	Salivary secretion	6.69021	1.82789e-09	8.95294e-09	22318	Vamp2
4970	Salivary secretion	6.69021	1.82789e-09	8.95294e-09	12182	Bst1
4970	Salivary secretion	6.69021	1.82789e-09	8.95294e-09	16531	Kcnma1
4970	Salivary secretion	6.69021	1.82789e-09	8.95294e-09	17105	Lyz2
4970	Salivary secretion	6.69021	1.82789e-09	8.95294e-09	54195	Gucy1b3
4540	Gap junction	6.19828	2.14419e-09	1.00903e-08	13489	Drd2
4540	Gap junction	6.19828	2.14419e-09	1.00903e-08	11514	Adcy8
4540	Gap junction	6.19828	2.14419e-09	1.00903e-08	18595	Pdgfra
4540	Gap junction	6.19828	2.14419e-09	1.00903e-08	22152	Tubb3
4540	Gap junction	6.19828	2.14419e-09	1.00903e-08	22145	Tuba4a
4540	Gap junction	6.19828	2.14419e-09	1.00903e-08	54195	Gucy1b3
4540	Gap junction	6.19828	2.14419e-09	1.00903e-08	15560	Htr2c
4540	Gap junction	6.19828	2.14419e-09	1.00903e-08	12534	Cdk1
4540	Gap junction	6.19828	2.14419e-09	1.00903e-08	11515	Adcy9
4540	Gap junction	6.19828	2.14419e-09	1.00903e-08	18596	Pdgfrb
4540	Gap junction	6.19828	2.14419e-09	1.00903e-08	210044	Adcy2
4540	Gap junction	6.19828	2.14419e-09	1.00903e-08	54635	Pdgfc
4540	Gap junction	6.19828	2.14419e-09	1.00903e-08	53857	Tuba8
4540	Gap junction	6.19828	2.14419e-09	1.00903e-08	18798	Plcb4
4540	Gap junction	6.19828	2.14419e-09	1.00903e-08	15559	Htr2b
4540	Gap junction	6.19828	2.14419e-09	1.00903e-08	13649	Egfr
4540	Gap junction	6.19828	2.14419e-09	1.00903e-08	224129	Adcy5
4540	Gap junction	6.19828	2.14419e-09	1.00903e-08	15558	Htr2a
4640	Hematopoietic cell lineage	6.19828	2.14419e-09	1.00903e-08	16401	Itga4
4640	Hematopoietic cell lineage	6.19828	2.14419e-09	1.00903e-08	16177	Il1r1
4640	Hematopoietic cell lineage	6.19828	2.14419e-09	1.00903e-08	16175	Il1a
4640	Hematopoietic cell lineage	6.19828	2.14419e-09	1.00903e-08	14129	Fcgr1
4640	Hematopoietic cell lineage	6.19828	2.14419e-09	1.00903e-08	16197	Il7r
4640	Hematopoietic cell lineage	6.19828	2.14419e-09	1.00903e-08	12505	Cd44
4640	Hematopoietic cell lineage	6.19828	2.14419e-09	1.00903e-08	16176	Il1b
4640	Hematopoietic cell lineage	6.19828	2.14419e-09	1.00903e-08	14255	Flt3
4640	Hematopoietic cell lineage	6.19828	2.14419e-09	1.00903e-08	16409	Itgam
4640	Hematopoietic cell lineage	6.19828	2.14419e-09	1.00903e-08	16790	Anpep
4640	Hematopoietic cell lineage	6.19828	2.14419e-09	1.00903e-08	12483	Cd22
4640	Hematopoietic cell lineage	6.19828	2.14419e-09	1.00903e-08	16190	Il4ra
4640	Hematopoietic cell lineage	6.19828	2.14419e-09	1.00903e-08	12504	Cd4
4640	Hematopoietic cell lineage	6.19828	2.14419e-09	1.00903e-08	12978	Csf1r
4640	Hematopoietic cell lineage	6.19828	2.14419e-09	1.00903e-08	12493	Cd37
4640	Hematopoietic cell lineage	6.19828	2.14419e-09	1.00903e-08	12986	Csf3r
4640	Hematopoietic cell lineage	6.19828	2.14419e-09	1.00903e-08	12475	Cd14
4640	Hematopoietic cell lineage	6.19828	2.14419e-09	1.00903e-08	12489	Cd33
4915	Estrogen signaling pathway	5.81567	2.25789e-09	1.02588e-08	18798	Plcb4
4915	Estrogen signaling pathway	5.81567	2.25789e-09	1.02588e-08	320207	Pik3r5
4915	Estrogen signaling pathway	5.81567	2.25789e-09	1.02588e-08	14681	Gnao1
4915	Estrogen signaling pathway	5.81567	2.25789e-09	1.02588e-08	16519	Kcnj3
4915	Estrogen signaling pathway	5.81567	2.25789e-09	1.02588e-08	16524	Kcnj9
4915	Estrogen signaling pathway	5.81567	2.25789e-09	1.02588e-08	30955	Pik3cg
4915	Estrogen signaling pathway	5.81567	2.25789e-09	1.02588e-08	18753	Prkcd
4915	Estrogen signaling pathway	5.81567	2.25789e-09	1.02588e-08	17390	Mmp2
4915	Estrogen signaling pathway	5.81567	2.25789e-09	1.02588e-08	54393	Gabbr1
4915	Estrogen signaling pathway	5.81567	2.25789e-09	1.02588e-08	14229	Fkbp5
4915	Estrogen signaling pathway	5.81567	2.25789e-09	1.02588e-08	210044	Adcy2
4915	Estrogen signaling pathway	5.81567	2.25789e-09	1.02588e-08	14281	Fos
4915	Estrogen signaling pathway	5.81567	2.25789e-09	1.02588e-08	26427	Creb3l1
4915	Estrogen signaling pathway	5.81567	2.25789e-09	1.02588e-08	11515	Adcy9
4915	Estrogen signaling pathway	5.81567	2.25789e-09	1.02588e-08	224129	Adcy5
4915	Estrogen signaling pathway	5.81567	2.25789e-09	1.02588e-08	20418	Shc3
4915	Estrogen signaling pathway	5.81567	2.25789e-09	1.02588e-08	20416	Shc1
4915	Estrogen signaling pathway	5.81567	2.25789e-09	1.02588e-08	11514	Adcy8
4915	Estrogen signaling pathway	5.81567	2.25789e-09	1.02588e-08	13649	Egfr
5100	Bacterial invasion of epithelial cells	6.60444	2.26548e-09	1.02588e-08	56378	Arpc3
5100	Bacterial invasion of epithelial cells	6.60444	2.26548e-09	1.02588e-08	78514	Arhgap10
5100	Bacterial invasion of epithelial cells	6.60444	2.26548e-09	1.02588e-08	16412	Itgb1
5100	Bacterial invasion of epithelial cells	6.60444	2.26548e-09	1.02588e-08	11867	Arpc1b
5100	Bacterial invasion of epithelial cells	6.60444	2.26548e-09	1.02588e-08	67771	Arpc5
5100	Bacterial invasion of epithelial cells	6.60444	2.26548e-09	1.02588e-08	103967	Dnm3
5100	Bacterial invasion of epithelial cells	6.60444	2.26548e-09	1.02588e-08	320207	Pik3r5
5100	Bacterial invasion of epithelial cells	6.60444	2.26548e-09	1.02588e-08	14268	Fn1
5100	Bacterial invasion of epithelial cells	6.60444	2.26548e-09	1.02588e-08	17295	Met
5100	Bacterial invasion of epithelial cells	6.60444	2.26548e-09	1.02588e-08	30955	Pik3cg
5100	Bacterial invasion of epithelial cells	6.60444	2.26548e-09	1.02588e-08	20418	Shc3
5100	Bacterial invasion of epithelial cells	6.60444	2.26548e-09	1.02588e-08	22330	Vcl
5100	Bacterial invasion of epithelial cells	6.60444	2.26548e-09	1.02588e-08	13429	Dnm1
5100	Bacterial invasion of epithelial cells	6.60444	2.26548e-09	1.02588e-08	15163	Hcls1
5100	Bacterial invasion of epithelial cells	6.60444	2.26548e-09	1.02588e-08	12389	Cav1
5100	Bacterial invasion of epithelial cells	6.60444	2.26548e-09	1.02588e-08	20416	Shc1
5100	Bacterial invasion of epithelial cells	6.60444	2.26548e-09	1.02588e-08	22376	Was
4912	GnRH signaling pathway	6.12864	2.605e-09	1.15778e-08	224129	Adcy5
4912	GnRH signaling pathway	6.12864	2.605e-09	1.15778e-08	11515	Adcy9
4912	GnRH signaling pathway	6.12864	2.605e-09	1.15778e-08	26420	Mapk9
4912	GnRH signaling pathway	6.12864	2.605e-09	1.15778e-08	12325	Camk2g
4912	GnRH signaling pathway	6.12864	2.605e-09	1.15778e-08	26406	Map3k3
4912	GnRH signaling pathway	6.12864	2.605e-09	1.15778e-08	17390	Mmp2
4912	GnRH signaling pathway	6.12864	2.605e-09	1.15778e-08	17387	Mmp14
4912	GnRH signaling pathway	6.12864	2.605e-09	1.15778e-08	26414	Mapk10
4912	GnRH signaling pathway	6.12864	2.605e-09	1.15778e-08	18798	Plcb4
4912	GnRH signaling pathway	6.12864	2.605e-09	1.15778e-08	11514	Adcy8
4912	GnRH signaling pathway	6.12864	2.605e-09	1.15778e-08	18753	Prkcd
4912	GnRH signaling pathway	6.12864	2.605e-09	1.15778e-08	13649	Egfr
4912	GnRH signaling pathway	6.12864	2.605e-09	1.15778e-08	12323	Camk2b
4912	GnRH signaling pathway	6.12864	2.605e-09	1.15778e-08	26398	Map2k4
4912	GnRH signaling pathway	6.12864	2.605e-09	1.15778e-08	12322	Camk2a
4912	GnRH signaling pathway	6.12864	2.605e-09	1.15778e-08	210044	Adcy2
4912	GnRH signaling pathway	6.12864	2.605e-09	1.15778e-08	19229	Ptk2b
4912	GnRH signaling pathway	6.12864	2.605e-09	1.15778e-08	19094	Mapk11
4664	Fc epsilon RI signaling pathway	6.82878	4.28491e-09	1.86978e-08	26420	Mapk9
4664	Fc epsilon RI signaling pathway	6.82878	4.28491e-09	1.86978e-08	22324	Vav1
4664	Fc epsilon RI signaling pathway	6.82878	4.28491e-09	1.86978e-08	12229	Btk
4664	Fc epsilon RI signaling pathway	6.82878	4.28491e-09	1.86978e-08	26398	Map2k4
4664	Fc epsilon RI signaling pathway	6.82878	4.28491e-09	1.86978e-08	19354	Rac2
4664	Fc epsilon RI signaling pathway	6.82878	4.28491e-09	1.86978e-08	18753	Prkcd
4664	Fc epsilon RI signaling pathway	6.82878	4.28491e-09	1.86978e-08	16331	Inpp5d
4664	Fc epsilon RI signaling pathway	6.82878	4.28491e-09	1.86978e-08	20963	Syk
4664	Fc epsilon RI signaling pathway	6.82878	4.28491e-09	1.86978e-08	19094	Mapk11
4664	Fc epsilon RI signaling pathway	6.82878	4.28491e-09	1.86978e-08	17096	Lyn
4664	Fc epsilon RI signaling pathway	6.82878	4.28491e-09	1.86978e-08	320207	Pik3r5
4664	Fc epsilon RI signaling pathway	6.82878	4.28491e-09	1.86978e-08	234779	Plcg2
4664	Fc epsilon RI signaling pathway	6.82878	4.28491e-09	1.86978e-08	26414	Mapk10
4664	Fc epsilon RI signaling pathway	6.82878	4.28491e-09	1.86978e-08	16822	Lcp2
4664	Fc epsilon RI signaling pathway	6.82878	4.28491e-09	1.86978e-08	30955	Pik3cg
4664	Fc epsilon RI signaling pathway	6.82878	4.28491e-09	1.86978e-08	14127	Fcer1g
5162	Measles	4.76186	5.5731e-09	2.38847e-08	230073	Ddx58
5162	Measles	4.76186	5.5731e-09	2.38847e-08	22035	Tnfsf10
5162	Measles	4.76186	5.5731e-09	2.38847e-08	15976	Ifnar2
5162	Measles	4.76186	5.5731e-09	2.38847e-08	56489	Ikbke
5162	Measles	4.76186	5.5731e-09	2.38847e-08	319642	Rab9b
5162	Measles	4.76186	5.5731e-09	2.38847e-08	266632	Irak4
5162	Measles	4.76186	5.5731e-09	2.38847e-08	17874	Myd88
5162	Measles	4.76186	5.5731e-09	2.38847e-08	320207	Pik3r5
5162	Measles	4.76186	5.5731e-09	2.38847e-08	19106	Eif2ak2
5162	Measles	4.76186	5.5731e-09	2.38847e-08	14130	Fcgr2b
5162	Measles	4.76186	5.5731e-09	2.38847e-08	12566	Cdk2
5162	Measles	4.76186	5.5731e-09	2.38847e-08	17698	Msn
5162	Measles	4.76186	5.5731e-09	2.38847e-08	170743	Tlr7
5162	Measles	4.76186	5.5731e-09	2.38847e-08	71586	Ifih1
5162	Measles	4.76186	5.5731e-09	2.38847e-08	15979	Ifngr1
5162	Measles	4.76186	5.5731e-09	2.38847e-08	30955	Pik3cg
5162	Measles	4.76186	5.5731e-09	2.38847e-08	16175	Il1a
5162	Measles	4.76186	5.5731e-09	2.38847e-08	16176	Il1b
5162	Measles	4.76186	5.5731e-09	2.38847e-08	24088	Tlr2
5162	Measles	4.76186	5.5731e-09	2.38847e-08	12571	Cdk6
5162	Measles	4.76186	5.5731e-09	2.38847e-08	16186	Il2rg
5162	Measles	4.76186	5.5731e-09	2.38847e-08	16391	Irf9
5202	Transcriptional misregulation in cancer	4.18546	7.00492e-09	2.94944e-08	12475	Cd14
5202	Transcriptional misregulation in cancer	4.18546	7.00492e-09	2.94944e-08	12524	Cd86
5202	Transcriptional misregulation in cancer	4.18546	7.00492e-09	2.94944e-08	14129	Fcgr1
5202	Transcriptional misregulation in cancer	4.18546	7.00492e-09	2.94944e-08	14255	Flt3
5202	Transcriptional misregulation in cancer	4.18546	7.00492e-09	2.94944e-08	14247	Fli1
5202	Transcriptional misregulation in cancer	4.18546	7.00492e-09	2.94944e-08	19696	Rel
5202	Transcriptional misregulation in cancer	4.18546	7.00492e-09	2.94944e-08	18792	Plau
5202	Transcriptional misregulation in cancer	4.18546	7.00492e-09	2.94944e-08	12395	Runx1t1
5202	Transcriptional misregulation in cancer	4.18546	7.00492e-09	2.94944e-08	12978	Csf1r
5202	Transcriptional misregulation in cancer	4.18546	7.00492e-09	2.94944e-08	16009	Igfbp3
5202	Transcriptional misregulation in cancer	4.18546	7.00492e-09	2.94944e-08	11908	Atf1
5202	Transcriptional misregulation in cancer	4.18546	7.00492e-09	2.94944e-08	12606	Cebpa
5202	Transcriptional misregulation in cancer	4.18546	7.00492e-09	2.94944e-08	15446	Hpgd
5202	Transcriptional misregulation in cancer	4.18546	7.00492e-09	2.94944e-08	56312	Nupr1
5202	Transcriptional misregulation in cancer	4.18546	7.00492e-09	2.94944e-08	17869	Myc
5202	Transcriptional misregulation in cancer	4.18546	7.00492e-09	2.94944e-08	21912	Tspan7
5202	Transcriptional misregulation in cancer	4.18546	7.00492e-09	2.94944e-08	11796	Birc3
5202	Transcriptional misregulation in cancer	4.18546	7.00492e-09	2.94944e-08	16409	Itgam
5202	Transcriptional misregulation in cancer	4.18546	7.00492e-09	2.94944e-08	16000	Igf1
5202	Transcriptional misregulation in cancer	4.18546	7.00492e-09	2.94944e-08	17392	Mmp3
5202	Transcriptional misregulation in cancer	4.18546	7.00492e-09	2.94944e-08	20375	Sfpi1
5202	Transcriptional misregulation in cancer	4.18546	7.00492e-09	2.94944e-08	15242	Hhex
5202	Transcriptional misregulation in cancer	4.18546	7.00492e-09	2.94944e-08	53623	Gria3
5202	Transcriptional misregulation in cancer	4.18546	7.00492e-09	2.94944e-08	17295	Met
5202	Transcriptional misregulation in cancer	4.18546	7.00492e-09	2.94944e-08	21813	Tgfbr2
5410	Hypertrophic cardiomyopathy (HCM)	6.13269	7.6523e-09	3.16647e-08	12296	Cacnb2
5410	Hypertrophic cardiomyopathy (HCM)	6.13269	7.6523e-09	3.16647e-08	16419	Itgb5
5410	Hypertrophic cardiomyopathy (HCM)	6.13269	7.6523e-09	3.16647e-08	140723	Cacng5
5410	Hypertrophic cardiomyopathy (HCM)	6.13269	7.6523e-09	3.16647e-08	108079	Prkaa2
5410	Hypertrophic cardiomyopathy (HCM)	6.13269	7.6523e-09	3.16647e-08	56808	Cacna2d2
5410	Hypertrophic cardiomyopathy (HCM)	6.13269	7.6523e-09	3.16647e-08	16000	Igf1
5410	Hypertrophic cardiomyopathy (HCM)	6.13269	7.6523e-09	3.16647e-08	12300	Cacng2
5410	Hypertrophic cardiomyopathy (HCM)	6.13269	7.6523e-09	3.16647e-08	21803	Tgfb1
5410	Hypertrophic cardiomyopathy (HCM)	6.13269	7.6523e-09	3.16647e-08	16412	Itgb1
5410	Hypertrophic cardiomyopathy (HCM)	6.13269	7.6523e-09	3.16647e-08	16401	Itga4
5410	Hypertrophic cardiomyopathy (HCM)	6.13269	7.6523e-09	3.16647e-08	12298	Cacnb4
5410	Hypertrophic cardiomyopathy (HCM)	6.13269	7.6523e-09	3.16647e-08	16773	Lama2
5410	Hypertrophic cardiomyopathy (HCM)	6.13269	7.6523e-09	3.16647e-08	20191	Ryr2
5410	Hypertrophic cardiomyopathy (HCM)	6.13269	7.6523e-09	3.16647e-08	241226	Itga8
5410	Hypertrophic cardiomyopathy (HCM)	6.13269	7.6523e-09	3.16647e-08	16905	Lmna
5410	Hypertrophic cardiomyopathy (HCM)	6.13269	7.6523e-09	3.16647e-08	319480	Itga11
5410	Hypertrophic cardiomyopathy (HCM)	6.13269	7.6523e-09	3.16647e-08	20541	Slc8a1
4971	Gastric acid secretion	6.55194	8.19993e-09	3.33556e-08	12426	Cckbr
4971	Gastric acid secretion	6.55194	8.19993e-09	3.33556e-08	12325	Camk2g
4971	Gastric acid secretion	6.55194	8.19993e-09	3.33556e-08	232975	Atp1a3
4971	Gastric acid secretion	6.55194	8.19993e-09	3.33556e-08	16518	Kcnj2
4971	Gastric acid secretion	6.55194	8.19993e-09	3.33556e-08	16517	Kcnj16
4971	Gastric acid secretion	6.55194	8.19993e-09	3.33556e-08	12322	Camk2a
4971	Gastric acid secretion	6.55194	8.19993e-09	3.33556e-08	11931	Atp1b1
4971	Gastric acid secretion	6.55194	8.19993e-09	3.33556e-08	18798	Plcb4
4971	Gastric acid secretion	6.55194	8.19993e-09	3.33556e-08	11515	Adcy9
4971	Gastric acid secretion	6.55194	8.19993e-09	3.33556e-08	208890	Slc26a7
4971	Gastric acid secretion	6.55194	8.19993e-09	3.33556e-08	11514	Adcy8
4971	Gastric acid secretion	6.55194	8.19993e-09	3.33556e-08	22350	Ezr
4971	Gastric acid secretion	6.55194	8.19993e-09	3.33556e-08	12323	Camk2b
4971	Gastric acid secretion	6.55194	8.19993e-09	3.33556e-08	224129	Adcy5
4971	Gastric acid secretion	6.55194	8.19993e-09	3.33556e-08	107589	Mylk
4971	Gastric acid secretion	6.55194	8.19993e-09	3.33556e-08	210044	Adcy2
4144	Endocytosis	3.771	8.51187e-09	3.36559e-08	12389	Cav1
4144	Endocytosis	3.771	8.51187e-09	3.36559e-08	103967	Dnm3
4144	Endocytosis	3.771	8.51187e-09	3.36559e-08	13429	Dnm1
4144	Endocytosis	3.771	8.51187e-09	3.36559e-08	13132	Dab2
4144	Endocytosis	3.771	8.51187e-09	3.36559e-08	18762	Prkcz
4144	Endocytosis	3.771	8.51187e-09	3.36559e-08	14276	Folr2
4144	Endocytosis	3.771	8.51187e-09	3.36559e-08	20408	Sh3gl3
4144	Endocytosis	3.771	8.51187e-09	3.36559e-08	19326	Rab11b
4144	Endocytosis	3.771	8.51187e-09	3.36559e-08	72685	Dnajc6
4144	Endocytosis	3.771	8.51187e-09	3.36559e-08	69710	Arap1
4144	Endocytosis	3.771	8.51187e-09	3.36559e-08	73728	Psd
4144	Endocytosis	3.771	8.51187e-09	3.36559e-08	12978	Csf1r
4144	Endocytosis	3.771	8.51187e-09	3.36559e-08	98878	Ehd4
4144	Endocytosis	3.771	8.51187e-09	3.36559e-08	17295	Met
4144	Endocytosis	3.771	8.51187e-09	3.36559e-08	18595	Pdgfra
4144	Endocytosis	3.771	8.51187e-09	3.36559e-08	18719	Pip5k1b
4144	Endocytosis	3.771	8.51187e-09	3.36559e-08	13649	Egfr
4144	Endocytosis	3.771	8.51187e-09	3.36559e-08	20404	Sh3gl2
4144	Endocytosis	3.771	8.51187e-09	3.36559e-08	259300	Ehd2
4144	Endocytosis	3.771	8.51187e-09	3.36559e-08	67028	2610002M06Rik
4144	Endocytosis	3.771	8.51187e-09	3.36559e-08	21803	Tgfb1
4144	Endocytosis	3.771	8.51187e-09	3.36559e-08	21812	Tgfbr1
4144	Endocytosis	3.771	8.51187e-09	3.36559e-08	14972	H2-K1
4144	Endocytosis	3.771	8.51187e-09	3.36559e-08	16186	Il2rg
4144	Endocytosis	3.771	8.51187e-09	3.36559e-08	93737	Pard6g
4144	Endocytosis	3.771	8.51187e-09	3.36559e-08	16835	Ldlr
4144	Endocytosis	3.771	8.51187e-09	3.36559e-08	15024	H2-T10
4144	Endocytosis	3.771	8.51187e-09	3.36559e-08	21813	Tgfbr2
4630	Jak-STAT signaling pathway	4.46771	8.55421e-09	3.36559e-08	12986	Csf3r
4630	Jak-STAT signaling pathway	4.46771	8.55421e-09	3.36559e-08	17869	Myc
4630	Jak-STAT signaling pathway	4.46771	8.55421e-09	3.36559e-08	16847	Lepr
4630	Jak-STAT signaling pathway	4.46771	8.55421e-09	3.36559e-08	16391	Irf9
4630	Jak-STAT signaling pathway	4.46771	8.55421e-09	3.36559e-08	16190	Il4ra
4630	Jak-STAT signaling pathway	4.46771	8.55421e-09	3.36559e-08	16164	Il13ra1
4630	Jak-STAT signaling pathway	4.46771	8.55421e-09	3.36559e-08	15976	Ifnar2
4630	Jak-STAT signaling pathway	4.46771	8.55421e-09	3.36559e-08	12804	Cntfr
4630	Jak-STAT signaling pathway	4.46771	8.55421e-09	3.36559e-08	20852	Stat6
4630	Jak-STAT signaling pathway	4.46771	8.55421e-09	3.36559e-08	16186	Il2rg
4630	Jak-STAT signaling pathway	4.46771	8.55421e-09	3.36559e-08	67296	Socs4
4630	Jak-STAT signaling pathway	4.46771	8.55421e-09	3.36559e-08	12984	Csf2rb2
4630	Jak-STAT signaling pathway	4.46771	8.55421e-09	3.36559e-08	16155	Il10rb
4630	Jak-STAT signaling pathway	4.46771	8.55421e-09	3.36559e-08	18414	Osmr
4630	Jak-STAT signaling pathway	4.46771	8.55421e-09	3.36559e-08	12983	Csf2rb
4630	Jak-STAT signaling pathway	4.46771	8.55421e-09	3.36559e-08	320207	Pik3r5
4630	Jak-STAT signaling pathway	4.46771	8.55421e-09	3.36559e-08	15979	Ifngr1
4630	Jak-STAT signaling pathway	4.46771	8.55421e-09	3.36559e-08	15170	Ptpn6
4630	Jak-STAT signaling pathway	4.46771	8.55421e-09	3.36559e-08	12702	Socs3
4630	Jak-STAT signaling pathway	4.46771	8.55421e-09	3.36559e-08	16197	Il7r
4630	Jak-STAT signaling pathway	4.46771	8.55421e-09	3.36559e-08	16154	Il10ra
4630	Jak-STAT signaling pathway	4.46771	8.55421e-09	3.36559e-08	216233	Socs2
4630	Jak-STAT signaling pathway	4.46771	8.55421e-09	3.36559e-08	30955	Pik3cg
4722	Neurotrophin signaling pathway	4.92727	1.67524e-08	6.48481e-08	20418	Shc3
4722	Neurotrophin signaling pathway	4.92727	1.67524e-08	6.48481e-08	18753	Prkcd
4722	Neurotrophin signaling pathway	4.92727	1.67524e-08	6.48481e-08	20416	Shc1
4722	Neurotrophin signaling pathway	4.92727	1.67524e-08	6.48481e-08	215449	Rap1b
4722	Neurotrophin signaling pathway	4.92727	1.67524e-08	6.48481e-08	19094	Mapk11
4722	Neurotrophin signaling pathway	4.92727	1.67524e-08	6.48481e-08	18213	Ntrk3
4722	Neurotrophin signaling pathway	4.92727	1.67524e-08	6.48481e-08	20112	Rps6ka2
4722	Neurotrophin signaling pathway	4.92727	1.67524e-08	6.48481e-08	11857	Arhgdib
4722	Neurotrophin signaling pathway	4.92727	1.67524e-08	6.48481e-08	12322	Camk2a
4722	Neurotrophin signaling pathway	4.92727	1.67524e-08	6.48481e-08	234779	Plcg2
4722	Neurotrophin signaling pathway	4.92727	1.67524e-08	6.48481e-08	26414	Mapk10
4722	Neurotrophin signaling pathway	4.92727	1.67524e-08	6.48481e-08	14570	Arhgdig
4722	Neurotrophin signaling pathway	4.92727	1.67524e-08	6.48481e-08	30955	Pik3cg
4722	Neurotrophin signaling pathway	4.92727	1.67524e-08	6.48481e-08	12323	Camk2b
4722	Neurotrophin signaling pathway	4.92727	1.67524e-08	6.48481e-08	26406	Map3k3
4722	Neurotrophin signaling pathway	4.92727	1.67524e-08	6.48481e-08	26420	Mapk9
4722	Neurotrophin signaling pathway	4.92727	1.67524e-08	6.48481e-08	320207	Pik3r5
4722	Neurotrophin signaling pathway	4.92727	1.67524e-08	6.48481e-08	266632	Irak4
4722	Neurotrophin signaling pathway	4.92727	1.67524e-08	6.48481e-08	73914	Irak3
4722	Neurotrophin signaling pathway	4.92727	1.67524e-08	6.48481e-08	12325	Camk2g
5160	Hepatitis C	4.6791	1.80949e-08	6.89329e-08	26414	Mapk10
5160	Hepatitis C	4.6791	1.80949e-08	6.89329e-08	22031	Traf3
5160	Hepatitis C	4.6791	1.80949e-08	6.89329e-08	320207	Pik3r5
5160	Hepatitis C	4.6791	1.80949e-08	6.89329e-08	24014	Rnasel
5160	Hepatitis C	4.6791	1.80949e-08	6.89329e-08	16835	Ldlr
5160	Hepatitis C	4.6791	1.80949e-08	6.89329e-08	30955	Pik3cg
5160	Hepatitis C	4.6791	1.80949e-08	6.89329e-08	230073	Ddx58
5160	Hepatitis C	4.6791	1.80949e-08	6.89329e-08	26420	Mapk9
5160	Hepatitis C	4.6791	1.80949e-08	6.89329e-08	19094	Mapk11
5160	Hepatitis C	4.6791	1.80949e-08	6.89329e-08	15957	Ifit1
5160	Hepatitis C	4.6791	1.80949e-08	6.89329e-08	269643	Ppp2r2c
5160	Hepatitis C	4.6791	1.80949e-08	6.89329e-08	21937	Tnfrsf1a
5160	Hepatitis C	4.6791	1.80949e-08	6.89329e-08	12737	Cldn1
5160	Hepatitis C	4.6791	1.80949e-08	6.89329e-08	16391	Irf9
5160	Hepatitis C	4.6791	1.80949e-08	6.89329e-08	56489	Ikbke
5160	Hepatitis C	4.6791	1.80949e-08	6.89329e-08	19106	Eif2ak2
5160	Hepatitis C	4.6791	1.80949e-08	6.89329e-08	15976	Ifnar2
5160	Hepatitis C	4.6791	1.80949e-08	6.89329e-08	19766	Ripk1
5160	Hepatitis C	4.6791	1.80949e-08	6.89329e-08	12702	Socs3
5160	Hepatitis C	4.6791	1.80949e-08	6.89329e-08	16362	Irf1
5160	Hepatitis C	4.6791	1.80949e-08	6.89329e-08	13649	Egfr
5169	Epstein-Barr virus infection	3.71897	2.21703e-08	8.31386e-08	26414	Mapk10
5169	Epstein-Barr virus infection	3.71897	2.21703e-08	8.31386e-08	230073	Ddx58
5169	Epstein-Barr virus infection	3.71897	2.21703e-08	8.31386e-08	26398	Map2k4
5169	Epstein-Barr virus infection	3.71897	2.21703e-08	8.31386e-08	12182	Bst1
5169	Epstein-Barr virus infection	3.71897	2.21703e-08	8.31386e-08	16154	Il10ra
5169	Epstein-Barr virus infection	3.71897	2.21703e-08	8.31386e-08	12505	Cd44
5169	Epstein-Barr virus infection	3.71897	2.21703e-08	8.31386e-08	234779	Plcg2
5169	Epstein-Barr virus infection	3.71897	2.21703e-08	8.31386e-08	17096	Lyn
5169	Epstein-Barr virus infection	3.71897	2.21703e-08	8.31386e-08	14972	H2-K1
5169	Epstein-Barr virus infection	3.71897	2.21703e-08	8.31386e-08	12495	Entpd1
5169	Epstein-Barr virus infection	3.71897	2.21703e-08	8.31386e-08	22352	Vim
5169	Epstein-Barr virus infection	3.71897	2.21703e-08	8.31386e-08	320207	Pik3r5
5169	Epstein-Barr virus infection	3.71897	2.21703e-08	8.31386e-08	15894	Icam1
5169	Epstein-Barr virus infection	3.71897	2.21703e-08	8.31386e-08	22031	Traf3
5169	Epstein-Barr virus infection	3.71897	2.21703e-08	8.31386e-08	20963	Syk
5169	Epstein-Barr virus infection	3.71897	2.21703e-08	8.31386e-08	16155	Il10rb
5169	Epstein-Barr virus infection	3.71897	2.21703e-08	8.31386e-08	17869	Myc
5169	Epstein-Barr virus infection	3.71897	2.21703e-08	8.31386e-08	12534	Cdk1
5169	Epstein-Barr virus infection	3.71897	2.21703e-08	8.31386e-08	26420	Mapk9
5169	Epstein-Barr virus infection	3.71897	2.21703e-08	8.31386e-08	15024	H2-T10
5169	Epstein-Barr virus infection	3.71897	2.21703e-08	8.31386e-08	30955	Pik3cg
5169	Epstein-Barr virus infection	3.71897	2.21703e-08	8.31386e-08	19094	Mapk11
5169	Epstein-Barr virus infection	3.71897	2.21703e-08	8.31386e-08	215446	Entpd3
5169	Epstein-Barr virus infection	3.71897	2.21703e-08	8.31386e-08	19766	Ripk1
5169	Epstein-Barr virus infection	3.71897	2.21703e-08	8.31386e-08	19106	Eif2ak2
5169	Epstein-Barr virus infection	3.71897	2.21703e-08	8.31386e-08	20375	Sfpi1
5169	Epstein-Barr virus infection	3.71897	2.21703e-08	8.31386e-08	12566	Cdk2
4930	Type II diabetes mellitus	7.87871	2.40068e-08	8.86404e-08	67296	Socs4
4930	Type II diabetes mellitus	7.87871	2.40068e-08	8.86404e-08	15277	Hk2
4930	Type II diabetes mellitus	7.87871	2.40068e-08	8.86404e-08	12290	Cacna1e
4930	Type II diabetes mellitus	7.87871	2.40068e-08	8.86404e-08	26420	Mapk9
4930	Type II diabetes mellitus	7.87871	2.40068e-08	8.86404e-08	320207	Pik3r5
4930	Type II diabetes mellitus	7.87871	2.40068e-08	8.86404e-08	12702	Socs3
4930	Type II diabetes mellitus	7.87871	2.40068e-08	8.86404e-08	18762	Prkcz
4930	Type II diabetes mellitus	7.87871	2.40068e-08	8.86404e-08	26414	Mapk10
4930	Type II diabetes mellitus	7.87871	2.40068e-08	8.86404e-08	12287	Cacna1b
4930	Type II diabetes mellitus	7.87871	2.40068e-08	8.86404e-08	216233	Socs2
4930	Type II diabetes mellitus	7.87871	2.40068e-08	8.86404e-08	30955	Pik3cg
4930	Type II diabetes mellitus	7.87871	2.40068e-08	8.86404e-08	18753	Prkcd
4930	Type II diabetes mellitus	7.87871	2.40068e-08	8.86404e-08	16514	Kcnj11
531	Glycosaminoglycan degradation	12.9869	3.74043e-08	1.36016e-07	15442	Hpse
531	Glycosaminoglycan degradation	12.9869	3.74043e-08	1.36016e-07	75612	Gns
531	Glycosaminoglycan degradation	12.9869	3.74043e-08	1.36016e-07	15211	Hexa
531	Glycosaminoglycan degradation	12.9869	3.74043e-08	1.36016e-07	110006	Gusb
531	Glycosaminoglycan degradation	12.9869	3.74043e-08	1.36016e-07	15212	Hexb
531	Glycosaminoglycan degradation	12.9869	3.74043e-08	1.36016e-07	50917	Galns
531	Glycosaminoglycan degradation	12.9869	3.74043e-08	1.36016e-07	15586	Hyal1
531	Glycosaminoglycan degradation	12.9869	3.74043e-08	1.36016e-07	27419	Naglu
531	Glycosaminoglycan degradation	12.9869	3.74043e-08	1.36016e-07	11881	Arsb
5150	Staphylococcus aureus infection	7.57568	4.03986e-08	1.44712e-07	12267	C3ar1
5150	Staphylococcus aureus infection	7.57568	4.03986e-08	1.44712e-07	12263	C2
5150	Staphylococcus aureus infection	7.57568	4.03986e-08	1.44712e-07	12260	C1qb
5150	Staphylococcus aureus infection	7.57568	4.03986e-08	1.44712e-07	14960	H2-Aa
5150	Staphylococcus aureus infection	7.57568	4.03986e-08	1.44712e-07	14129	Fcgr1
5150	Staphylococcus aureus infection	7.57568	4.03986e-08	1.44712e-07	16414	Itgb2
5150	Staphylococcus aureus infection	7.57568	4.03986e-08	1.44712e-07	15894	Icam1
5150	Staphylococcus aureus infection	7.57568	4.03986e-08	1.44712e-07	12259	C1qa
5150	Staphylococcus aureus infection	7.57568	4.03986e-08	1.44712e-07	14131	Fcgr3
5150	Staphylococcus aureus infection	7.57568	4.03986e-08	1.44712e-07	14130	Fcgr2b
5150	Staphylococcus aureus infection	7.57568	4.03986e-08	1.44712e-07	16409	Itgam
5150	Staphylococcus aureus infection	7.57568	4.03986e-08	1.44712e-07	12268	C4b
5150	Staphylococcus aureus infection	7.57568	4.03986e-08	1.44712e-07	14961	H2-Ab1
5222	Small cell lung cancer	5.63771	8.11637e-08	2.8646e-07	14268	Fn1
5222	Small cell lung cancer	5.63771	8.11637e-08	2.8646e-07	320207	Pik3r5
5222	Small cell lung cancer	5.63771	8.11637e-08	2.8646e-07	16412	Itgb1
5222	Small cell lung cancer	5.63771	8.11637e-08	2.8646e-07	30955	Pik3cg
5222	Small cell lung cancer	5.63771	8.11637e-08	2.8646e-07	16777	Lamb1
5222	Small cell lung cancer	5.63771	8.11637e-08	2.8646e-07	17869	Myc
5222	Small cell lung cancer	5.63771	8.11637e-08	2.8646e-07	12571	Cdk6
5222	Small cell lung cancer	5.63771	8.11637e-08	2.8646e-07	16773	Lama2
5222	Small cell lung cancer	5.63771	8.11637e-08	2.8646e-07	226519	Lamc1
5222	Small cell lung cancer	5.63771	8.11637e-08	2.8646e-07	22031	Traf3
5222	Small cell lung cancer	5.63771	8.11637e-08	2.8646e-07	12827	Col4a2
5222	Small cell lung cancer	5.63771	8.11637e-08	2.8646e-07	16775	Lama4
5222	Small cell lung cancer	5.63771	8.11637e-08	2.8646e-07	12566	Cdk2
5222	Small cell lung cancer	5.63771	8.11637e-08	2.8646e-07	12826	Col4a1
5222	Small cell lung cancer	5.63771	8.11637e-08	2.8646e-07	19225	Ptgs2
5222	Small cell lung cancer	5.63771	8.11637e-08	2.8646e-07	11796	Birc3
100	Steroid biosynthesis	14.2601	1.03306e-07	3.59325e-07	20652	Soat1
100	Steroid biosynthesis	14.2601	1.03306e-07	3.59325e-07	16889	Lipa
100	Steroid biosynthesis	14.2601	1.03306e-07	3.59325e-07	74754	Dhcr24
100	Steroid biosynthesis	14.2601	1.03306e-07	3.59325e-07	235293	Sc5d
100	Steroid biosynthesis	14.2601	1.03306e-07	3.59325e-07	13121	Cyp51
100	Steroid biosynthesis	14.2601	1.03306e-07	3.59325e-07	66234	Sc4mol
100	Steroid biosynthesis	14.2601	1.03306e-07	3.59325e-07	73166	Tm7sf2
100	Steroid biosynthesis	14.2601	1.03306e-07	3.59325e-07	16987	Lss
4662	B cell receptor signaling pathway	5.82744	1.40265e-07	4.8091e-07	17060	Blnk
4662	B cell receptor signaling pathway	5.82744	1.40265e-07	4.8091e-07	12483	Cd22
4662	B cell receptor signaling pathway	5.82744	1.40265e-07	4.8091e-07	16331	Inpp5d
4662	B cell receptor signaling pathway	5.82744	1.40265e-07	4.8091e-07	19354	Rac2
4662	B cell receptor signaling pathway	5.82744	1.40265e-07	4.8091e-07	20963	Syk
4662	B cell receptor signaling pathway	5.82744	1.40265e-07	4.8091e-07	83490	Pik3ap1
4662	B cell receptor signaling pathway	5.82744	1.40265e-07	4.8091e-07	17096	Lyn
4662	B cell receptor signaling pathway	5.82744	1.40265e-07	4.8091e-07	14130	Fcgr2b
4662	B cell receptor signaling pathway	5.82744	1.40265e-07	4.8091e-07	15170	Ptpn6
4662	B cell receptor signaling pathway	5.82744	1.40265e-07	4.8091e-07	14281	Fos
4662	B cell receptor signaling pathway	5.82744	1.40265e-07	4.8091e-07	30955	Pik3cg
4662	B cell receptor signaling pathway	5.82744	1.40265e-07	4.8091e-07	234779	Plcg2
4662	B cell receptor signaling pathway	5.82744	1.40265e-07	4.8091e-07	22324	Vav1
4662	B cell receptor signaling pathway	5.82744	1.40265e-07	4.8091e-07	320207	Pik3r5
4662	B cell receptor signaling pathway	5.82744	1.40265e-07	4.8091e-07	12229	Btk
5144	Malaria	7.42107	1.91597e-07	6.47653e-07	16176	Il1b
5144	Malaria	7.42107	1.91597e-07	6.47653e-07	16414	Itgb2
5144	Malaria	7.42107	1.91597e-07	6.47653e-07	17295	Met
5144	Malaria	7.42107	1.91597e-07	6.47653e-07	71683	Gypc
5144	Malaria	7.42107	1.91597e-07	6.47653e-07	17874	Myd88
5144	Malaria	7.42107	1.91597e-07	6.47653e-07	21803	Tgfb1
5144	Malaria	7.42107	1.91597e-07	6.47653e-07	21825	Thbs1
5144	Malaria	7.42107	1.91597e-07	6.47653e-07	15894	Icam1
5144	Malaria	7.42107	1.91597e-07	6.47653e-07	24088	Tlr2
5144	Malaria	7.42107	1.91597e-07	6.47653e-07	21826	Thbs2
5144	Malaria	7.42107	1.91597e-07	6.47653e-07	15129	Hbb-b1
5144	Malaria	7.42107	1.91597e-07	6.47653e-07	15234	Hgf
5134	Legionellosis	6.67687	2.07686e-07	6.92287e-07	53880	Naip7
5134	Legionellosis	6.67687	2.07686e-07	6.92287e-07	12475	Cd14
5134	Legionellosis	6.67687	2.07686e-07	6.92287e-07	16409	Itgam
5134	Legionellosis	6.67687	2.07686e-07	6.92287e-07	24088	Tlr2
5134	Legionellosis	6.67687	2.07686e-07	6.92287e-07	17948	Naip2
[truncated: 1,143 more rows]

## Sheet: Sheet3
path_name	(-LgP)
Neuroactive ligand-receptor interaction	34.2985
PI3K-Akt signaling pathway	30.51
Focal adhesion	28.6253
Metabolic pathways	24.7484
Osteoclast differentiation	24.5449
Lysosome	23.8546
Retrograde endocannabinoid signaling	22.2452
Tuberculosis	21.5572
ECM-receptor interaction	21.4365
Calcium signaling pathway	20.9776
MAPK signaling pathway	20.1378
Regulation of actin cytoskeleton	19.975
Proteoglycans in cancer	18.9521
Phagosome	18.6709
GABAergic synapse	18.6315
Toll-like receptor signaling pathway	18.2075
Nicotine addiction	18.2043
Dopaminergic synapse	17.3306
Cytokine-cytokine receptor interaction	17.2487
Amoebiasis	16.9565
Protein digestion and absorption	16.6804
Cholinergic synapse	16.6192
Circadian entrainment	16.3255
Leishmaniasis	15.3862
Glutamatergic synapse	15.298
Pathways in cancer	15.2533
Morphine addiction	14.9619
Chagas disease (American trypanosomiasis)	14.7129
Fc gamma R-mediated phagocytosis	14.0444
Synaptic vesicle cycle	13.5289
Cell adhesion molecules (CAMs)	13.0757
Chemokine signaling pathway	13.0048
Rheumatoid arthritis	12.9223
Toxoplasmosis	12.8261
Salmonella infection	12.4794
Pertussis	12.0393
Axon guidance	11.9881
Insulin secretion	11.4769
Apoptosis	10.9153
Influenza A	10.854
Leukocyte transendothelial migration	10.355
Dilated cardiomyopathy	10.3207
NF-kappa B signaling pathway	10.0699
Herpes simplex infection	9.38748
Natural killer cell mediated cytotoxicity	9.228
Hepatitis B	9.22263
Amyotrophic lateral sclerosis (ALS)	9.10822
HTLV-I infection	9.06772
Salivary secretion	8.73805
Gap junction	8.66874
Hematopoietic cell lineage	8.66874
Estrogen signaling pathway	8.6463
Bacterial invasion of epithelial cells	8.64484
GnRH signaling pathway	8.58419
Fc epsilon RI signaling pathway	8.36806
Measles	8.2539
Transcriptional misregulation in cancer	8.1546
Hypertrophic cardiomyopathy (HCM)	8.11621
Gastric acid secretion	8.08619
Endocytosis	8.06997
Jak-STAT signaling pathway	8.06782
Neurotrophin signaling pathway	7.77592
Hepatitis C	7.74244
Epstein-Barr virus infection	7.65423
Type II diabetes mellitus	7.61967
Glycosaminoglycan degradation	7.42708
Staphylococcus aureus infection	7.39363
Small cell lung cancer	7.09064
Steroid biosynthesis	6.98587
B cell receptor signaling pathway	6.85305
Malaria	6.71761
Legionellosis	6.68259
Hippo signaling pathway	6.66895
Amphetamine addiction	6.62511
Melanoma	6.38349
Arrhythmogenic right ventricular cardiomyopathy (ARVC)	6.30579
Colorectal cancer	6.23788
ErbB signaling pathway	6.19387
Glutathione metabolism	6.11997
Glioma	6.07233
Glycosphingolipid biosynthesis - globo series	6.06564
Progesterone-mediated oocyte maturation	6.05939
Pancreatic secretion	5.95362
Glycerophospholipid metabolism	5.92881
p53 signaling pathway	5.83576
Olfactory transduction	5.73922
Antigen processing and presentation	5.66265
Type I diabetes mellitus	5.36483
Complement and coagulation cascades	5.26505
Serotonergic synapse	5.23393
Long-term potentiation	4.93363
Viral carcinogenesis	4.76578
Cocaine addiction	4.73473
HIF-1 signaling pathway	4.70478
Oocyte meiosis	4.60955
Adherens junction	4.60946
Fatty acid elongation	4.44844
Viral myocarditis	4.27581
RIG-I-like receptor signaling pathway	4.20984
T cell receptor signaling pathway	4.18063
ABC transporters	4.17663
Primary immunodeficiency	4.13376
Insulin signaling pathway	4.13202
Sphingolipid metabolism	4.09719
Adipocytokine signaling pathway	4.08866
NOD-like receptor signaling pathway	4.06528
