# Supplementary material for: Aberrant LncRNA Expression Profile in a Contusion Spinal Cord Injury Mouse Model
Source: Biomed Res Int. 2016 Sep 4;2016:9249401. doi: 10.1155/2016/9249401 (PMC5027055; doi:10.1155/2016/9249401)
Supplement: Supplementary file 1 — S1 license pdf: The License Awarded by Soochow University. Table S1: Differential Expression of LncRNAs and Annotation. Table S2: Differential Expression of mRNAs and Annotation. Table S3: mRNAs STC Increase or Decrease. Table S4: LncRNAs STC Increase or Decrease. Table S5: The Significant GO Terms for Differentially Expressed. Table S6: The Significant Pathways of Differentially Expressed Genes. Table S7: The Quantity of the mRNA and LncRNA Network. S1 Fig: The dynamic network between LncRNAs and mRNAs. In this map, the circles with a green line represented LncRNAs, and the other circles represented mRNA. The lines between circles indicated regulation between these genes. The size of the circles indicated the ability of interaction between the genes. This ability was quantified by the degree, which was defined as the connective number between genes. The color was in accordance with the results of the clustering analysis, which was defined as the K-core. The same K-core indicated the similarity and correlation of function between genes. The red color representing the maximal K-core indicated the strongest regulation level in this network. [file 9249401.f1.zip › S7 Table.xls]

## Sheet: 文件说明
表名称	列头	列头的含义
mRNA和lncRNA的关系	Gene1/lncRNA1	基因/lncRNA名称,与NCBI GenBank和相应的lncRNA数据库标识一致
	type 1	区分是mRNA还是lncRNA
	Gene2/lncRNA2	基因/lncRNA名称,与NCBI GenBank和相应的lncRNA数据库标识一致
	type2	区分是mRNA还是lncRNA
	Interaction	相互作用系数,两个基因共表达程度,绝对值越大表示共表达能力越强，正负表示正调控和负调控
mRNA和lncRNA的属性	genesymbol/lncRNA	基因/lncRNA名称，与NCBI GenBank和相应的lncRNA数据库
	Description	对基因/lncRNA的描述
	Source	lncRNA的来源数据库
	degree	度,表示网络中与某一基因相互作用的基因的数量
	k-core	表示在一个子图中，所有的点至少连接着k个点。评估基因在网络位置的中心程度，值越大表示degree越大且越中心
	type	区分是mRNA还是lncRNA
	modelnumber	基因/lncRNA所在的趋势编号

## Sheet: The relationship  
Gene_1	type1	Gene_2	type2	Interaction
NONMMUT001318	non-coding	1110051M20Rik	coding	0.999032
NONMMUT037278	non-coding	1110051M20Rik	coding	0.998996
NONMMUT063537	non-coding	1110051M20Rik	coding	0.997398
n274811	non-coding	2410022L05Rik	coding	0.99745
NONMMUT019670	non-coding	2410022L05Rik	coding	0.999277
NONMMUT023865	non-coding	2410022L05Rik	coding	0.999638
NONMMUT023869	non-coding	2610002M06Rik	coding	0.997206
ENSMUST00000153025	non-coding	2610017I09Rik	coding	0.997546
NONMMUT021910	non-coding	2610017I09Rik	coding	0.997204
NONMMUT051642	non-coding	2610017I09Rik	coding	0.998871
ENSMUST00000155361	non-coding	2610039C10Rik	coding	-0.997082
NONMMUT026627	non-coding	4833424O15Rik	coding	0.997082
NONMMUT042291	non-coding	4833424O15Rik	coding	0.998902
NONMMUT055621	non-coding	4930572J05Rik	coding	0.997726
ENSMUST00000123548	non-coding	4933431E20Rik	coding	0.997729
ENSMUST00000140605	non-coding	4933431E20Rik	coding	0.998316
NONMMUT024677	non-coding	4933431E20Rik	coding	0.998079
NONMMUT030206	non-coding	4933431E20Rik	coding	0.997273
NONMMUT043579	non-coding	4933431E20Rik	coding	0.997586
NONMMUT055908	non-coding	4933431E20Rik	coding	0.998645
ENSMUST00000155361	non-coding	5033414D02Rik	coding	-0.998412
NONMMUT002429	non-coding	5730403B10Rik	coding	0.999176
NONMMUT009579	non-coding	5730403B10Rik	coding	0.997642
NONMMUT037278	non-coding	5730403B10Rik	coding	0.999183
NONMMUT024027	non-coding	6030419C18Rik	coding	0.999893
NONMMUT009847	non-coding	6330439K17Rik	coding	0.997798
NONMMUT038129	non-coding	6330503K22Rik	coding	0.997407
NONMMUT073155	non-coding	6330503K22Rik	coding	-0.998151
ENSMUST00000155361	non-coding	6430548M08Rik	coding	0.999347
ENSMUST00000154999	non-coding	8430419L09Rik	coding	-0.99754
NONMMUT054688	non-coding	8430419L09Rik	coding	0.998067
NONMMUT056384	non-coding	9330155M09Rik	coding	0.997186
ENSMUST00000145363	non-coding	9430031J16Rik	coding	0.997166
ENSMUST00000138093	non-coding	A030009H04Rik	coding	0.9972
ENSMUST00000139975	non-coding	A030009H04Rik	coding	0.997558
NONMMUT002429	non-coding	A730017C20Rik	coding	0.998908
NONMMUT037278	non-coding	A730017C20Rik	coding	0.99866
ENSMUST00000175979	non-coding	A830018L16Rik	coding	0.997135
n274811	non-coding	A830018L16Rik	coding	0.997043
NONMMUT024027	non-coding	A830018L16Rik	coding	0.997872
NONMMUT074698	non-coding	A830018L16Rik	coding	-0.999294
NONMMUT009850	non-coding	A930017M01Rik	coding	0.997141
NONMMUT020189	non-coding	A930017M01Rik	coding	0.999213
NONMMUT027272	non-coding	Aacs	coding	0.997403
NONMMUT061609	non-coding	Aacs	coding	0.9991
NONMMUT068540	non-coding	Aacs	coding	0.998032
ENSMUST00000150347	non-coding	Aatk	coding	0.998437
NONMMUT061402	non-coding	Aatk	coding	0.99791
NONMMUT023388	non-coding	AB124611	coding	-0.997238
NONMMUT061714	non-coding	AB124611	coding	-0.997351
ENSMUST00000155925	non-coding	Abat	coding	0.998394
NONMMUT074554	non-coding	Abat	coding	0.999788
ENSMUST00000172703	non-coding	Abca2	coding	0.997775
NONMMUT032196	non-coding	Abca2	coding	0.998123
NONMMUT065328	non-coding	Abca2	coding	0.997715
ENSMUST00000145363	non-coding	Abcb9	coding	0.999004
ENSMUST00000175979	non-coding	Abcb9	coding	0.998663
NONMMUT021286	non-coding	Abcb9	coding	0.999355
NONMMUT045895	non-coding	Abcb9	coding	0.997154
NONMMUT054688	non-coding	Abcb9	coding	0.997726
NONMMUT055492	non-coding	Abcb9	coding	0.997862
ENSMUST00000172703	non-coding	Abcg4	coding	0.998265
NONMMUT032196	non-coding	Abcg4	coding	0.99849
NONMMUT042289	non-coding	Abcg4	coding	0.998278
NONMMUT065328	non-coding	Abcg4	coding	0.999219
NONMMUT004432	non-coding	Abhd3	coding	0.997091
NONMMUT004524	non-coding	Abhd8	coding	0.998391
NONMMUT021734	non-coding	Abhd8	coding	0.999162
NONMMUT064537	non-coding	Abhd8	coding	0.998449
NONMMUT004432	non-coding	Ablim2	coding	0.999167
NONMMUT067800	non-coding	Ablim2	coding	0.999053
NONMMUT005549	non-coding	Accn2	coding	0.999227
NONMMUT027201	non-coding	Accn2	coding	0.997369
NONMMUT009850	non-coding	Ache	coding	0.99825
NONMMUT035870	non-coding	Ache	coding	-0.99713
NONMMUT061411	non-coding	Acly	coding	0.998187
NONMMUT005432	non-coding	Acp5	coding	0.998305
ENSMUST00000128109	non-coding	Acsl3	coding	0.998732
ENSMUST00000147162	non-coding	Acsl3	coding	-0.998829
NONMMUT009312	non-coding	Acsl3	coding	0.997547
NONMMUT014670	non-coding	Acsl3	coding	0.999461
NONMMUT023869	non-coding	Acsl3	coding	0.998607
ENSMUST00000154999	non-coding	Acss2	coding	-0.997073
ENSMUST00000145363	non-coding	Actl6b	coding	0.99749
NONMMUT000228	non-coding	Actl6b	coding	0.997131
NONMMUT001318	non-coding	Actl6b	coding	0.998552
NONMMUT021286	non-coding	Actl6b	coding	0.998469
NONMMUT054688	non-coding	Actl6b	coding	0.998918
ENSMUST00000155361	non-coding	Ada	coding	-0.997334
NONMMUT048370	non-coding	Ada	coding	-0.998841
ENSMUST00000145363	non-coding	Adam11	coding	0.999105
ENSMUST00000149165	non-coding	Adam11	coding	0.997861
NONMMUT042289	non-coding	Adam11	coding	0.997776
NONMMUT055492	non-coding	Adam11	coding	0.997528
NONMMUT001318	non-coding	Adam22	coding	0.999568
NONMMUT007331	non-coding	Adam22	coding	-0.997834
NONMMUT037278	non-coding	Adam22	coding	0.998622
NONMMUT063537	non-coding	Adam22	coding	0.998739
NONMMUT022574	non-coding	Adam8	coding	-0.997805
NONMMUT024407	non-coding	Adam8	coding	-0.997767
NONMMUT014775	non-coding	Adarb2	coding	0.997637
n279396	non-coding	Adcy2	coding	0.997835
NONMMUT032196	non-coding	Adcy2	coding	0.99715
ENSMUST00000125782	non-coding	Adcy5	coding	0.999718
NONMMUT061403	non-coding	Adcy5	coding	0.999623
ENSMUST00000127164	non-coding	Adcy8	coding	0.99911
NONMMUT000399	non-coding	Adcy8	coding	0.997111
NONMMUT008131	non-coding	Adcy8	coding	-0.998994
NONMMUT035776	non-coding	Adcy8	coding	-0.998934
NONMMUT051225	non-coding	Adcy8	coding	0.997027
ENSMUST00000136736	non-coding	Adcyap1r1	coding	0.998302
ENSMUST00000155925	non-coding	Adcyap1r1	coding	0.999766
NONMMUT074554	non-coding	Adcyap1r1	coding	0.9987
NONMMUT048370	non-coding	Add2	coding	0.998096
NONMMUT009850	non-coding	Adra1a	coding	0.998133
NONMMUT026612	non-coding	AF529169	coding	0.997216
ENSMUST00000175979	non-coding	Agtpbp1	coding	0.998185
NONMMUT007967	non-coding	Agtpbp1	coding	0.997642
NONMMUT021286	non-coding	Agtpbp1	coding	0.99828
NONMMUT035870	non-coding	Agtpbp1	coding	-0.998537
NONMMUT004848	non-coding	Ahi1	coding	0.998353
NONMMUT018492	non-coding	Ahi1	coding	-0.997069
NONMMUT019913	non-coding	Ahi1	coding	-0.997684
NONMMUT073591	non-coding	Ahi1	coding	0.997193
n274811	non-coding	AI593442	coding	0.997303
NONMMUT007967	non-coding	AI593442	coding	0.999093
NONMMUT061403	non-coding	AI593442	coding	0.998769
NONMMUT014102	non-coding	AI836003	coding	0.998291
NONMMUT023864	non-coding	AI836003	coding	0.997305
NONMMUT033184	non-coding	AI836003	coding	-0.999593
NONMMUT000228	non-coding	AI854703	coding	0.997475
NONMMUT054688	non-coding	AI854703	coding	0.998709
ENSMUST00000126791	non-coding	Ak5	coding	0.997127
ENSMUST00000136736	non-coding	Ak5	coding	0.998
NONMMUT032957	non-coding	Ak5	coding	0.999106
NONMMUT032959	non-coding	Ak5	coding	0.99814
NONMMUT048370	non-coding	Akap6	coding	0.999472
ENSMUST00000124186	non-coding	Akr1b8	coding	-0.997433
NONMMUT001312	non-coding	Akr1b8	coding	-0.999769
NONMMUT027201	non-coding	Akr1b8	coding	-0.998016
NONMMUT049701	non-coding	Akr1b8	coding	-0.998075
NONMMUT001312	non-coding	Aldh5a1	coding	0.997503
NONMMUT005549	non-coding	Aldh5a1	coding	0.99907
NONMMUT004524	non-coding	Alox5ap	coding	-0.998304
NONMMUT021734	non-coding	Alox5ap	coding	-0.998272
ENSMUST00000172703	non-coding	Alox8	coding	0.998393
NONMMUT032196	non-coding	Alox8	coding	0.998559
NONMMUT042289	non-coding	Alox8	coding	0.99787
NONMMUT065328	non-coding	Alox8	coding	0.999297
NONMMUT024027	non-coding	Amigo1	coding	0.998895
NONMMUT074698	non-coding	Amigo1	coding	-0.998666
NONMMUT009850	non-coding	Amph	coding	0.999743
ENSMUST00000085979	non-coding	Angptl4	coding	-0.997098
ENSMUST00000155361	non-coding	Ank3	coding	0.999921
NONMMUT062609	non-coding	Ank3	coding	0.99708
ENSMUST00000124186	non-coding	Ankrd13d	coding	0.998272
NONMMUT020707	non-coding	Ankrd13d	coding	0.997203
NONMMUT000228	non-coding	Ankrd34b	coding	0.998215
NONMMUT009850	non-coding	Ankrd34b	coding	0.998887
NONMMUT035870	non-coding	Ankrd34b	coding	-0.998723
NONMMUT055912	non-coding	Ankrd34c	coding	0.999594
NONMMUT001279	non-coding	Ankrd45	coding	-0.999217
NONMMUT022574	non-coding	Ankrd45	coding	0.999217
NONMMUT057511	non-coding	Ankrd45	coding	0.998895
NONMMUT009850	non-coding	Ano4	coding	0.998915
ENSMUST00000124186	non-coding	Anxa2	coding	-0.997543
NONMMUT001312	non-coding	Anxa2	coding	-0.999408
NONMMUT009297	non-coding	Anxa2	coding	-0.997171
NONMMUT027201	non-coding	Anxa2	coding	-0.998177
NONMMUT049701	non-coding	Anxa2	coding	-0.998835
NONMMUT027272	non-coding	Anxa3	coding	-0.99981
NONMMUT031134	non-coding	Anxa3	coding	-0.997027
NONMMUT038518	non-coding	Anxa3	coding	-0.997723
NONMMUT012277	non-coding	Anxa4	coding	0.997212
NONMMUT061936	non-coding	Anxa4	coding	-0.997241
NONMMUT073256	non-coding	Anxa4	coding	0.997925
ENSMUST00000128702	non-coding	Ap3b2	coding	0.997255
ENSMUST00000125782	non-coding	Apba1	coding	0.997368
NONMMUT011045	non-coding	Apba1	coding	0.99875
NONMMUT019670	non-coding	Apba1	coding	0.997283
NONMMUT023865	non-coding	Apba1	coding	0.997548
ENSMUST00000145363	non-coding	Apba2	coding	0.997622
NONMMUT000228	non-coding	Apba2	coding	0.997268
NONMMUT054688	non-coding	Apba2	coding	0.999928
n274811	non-coding	Apbb1	coding	0.998224
NONMMUT019670	non-coding	Apbb1	coding	0.998189
NONMMUT011045	non-coding	Apc2	coding	0.998392
NONMMUT061402	non-coding	Apc2	coding	0.997042
NONMMUT061403	non-coding	Apc2	coding	0.997622
NONMMUT011045	non-coding	Apol9b	coding	0.997518
NONMMUT024407	non-coding	Ar	coding	0.998276
ENSMUST00000128702	non-coding	Arc	coding	0.999134
ENSMUST00000131086	non-coding	Arc	coding	0.999129
ENSMUST00000126791	non-coding	Arhgap26	coding	0.997538
NONMMUT007331	non-coding	Arhgap26	coding	-0.997499
NONMMUT032142	non-coding	Arhgap26	coding	0.997076
NONMMUT045163	non-coding	Arhgap26	coding	0.99746
NONMMUT051355	non-coding	Arhgap26	coding	0.998763
NONMMUT057237	non-coding	Arhgap26	coding	0.999388
ENSMUST00000135195	non-coding	Arhgap32	coding	-0.997008
NONMMUT004432	non-coding	Arhgap32	coding	0.99886
NONMMUT032664	non-coding	Arhgap32	coding	-0.997992
NONMMUT067800	non-coding	Arhgap32	coding	0.998641
NONMMUT009850	non-coding	Arhgap44	coding	0.999021
NONMMUT035870	non-coding	Arhgap44	coding	-0.997208
ENSMUST00000118146	non-coding	Arhgdig	coding	-0.999452
ENSMUST00000131086	non-coding	Arhgdig	coding	0.998084
NONMMUT042187	non-coding	Arhgdig	coding	0.997922
NONMMUT073591	non-coding	Arhgdig	coding	0.99741
NONMMUT012808	non-coding	Arhgef4	coding	0.998901
NONMMUT045141	non-coding	Arhgef4	coding	0.997137
NONMMUT068903	non-coding	Arhgef4	coding	-0.998033
NONMMUT005432	non-coding	Arl11	coding	0.999261
NONMMUT042289	non-coding	Armcx1	coding	0.997392
NONMMUT065328	non-coding	Armcx1	coding	0.999178
NONMMUT009847	non-coding	Arpc3	coding	-0.997139
NONMMUT009850	non-coding	Arpc3	coding	-0.997634
ENSMUST00000155823	non-coding	Arpc5	coding	-0.997481
NONMMUT021181	non-coding	Arpc5	coding	0.997262
ENSMUST00000145363	non-coding	Arpp21	coding	0.999088
ENSMUST00000175979	non-coding	Arpp21	coding	0.997313
NONMMUT021286	non-coding	Arpp21	coding	0.998366
NONMMUT024027	non-coding	Arpp21	coding	0.997619
NONMMUT054688	non-coding	Arpp21	coding	0.998021
NONMMUT005549	non-coding	Arxes1	coding	0.999828
ENSMUST00000136119	non-coding	Asah2	coding	0.997997
NONMMUT068245	non-coding	Asah2	coding	0.998096
NONMMUT070203	non-coding	Asah2	coding	0.997059
ENSMUST00000146204	non-coding	Asb13	coding	0.997985
NONMMUT005138	non-coding	Asb13	coding	0.997566
NONMMUT068903	non-coding	Asb13	coding	-0.997272
ENSMUST00000175979	non-coding	Asphd2	coding	0.999868
NONMMUT021286	non-coding	Asphd2	coding	0.998384
NONMMUT074698	non-coding	Asphd2	coding	-0.998899
ENSMUST00000154999	non-coding	Atcay	coding	-0.998919
NONMMUT067432	non-coding	Atcay	coding	0.998149
NONMMUT007967	non-coding	Atl1	coding	0.997832
NONMMUT021286	non-coding	Atl1	coding	0.997662
NONMMUT035870	non-coding	Atl1	coding	-0.999423
NONMMUT009847	non-coding	Atp1b1	coding	0.997924
NONMMUT020189	non-coding	Atp1b1	coding	0.998419
NONMMUT007967	non-coding	Atp2b3	coding	0.997456
NONMMUT035870	non-coding	Atp2b3	coding	-0.99886
NONMMUT037278	non-coding	Atp6v0e2	coding	0.997397
NONMMUT000228	non-coding	Atp8a2	coding	0.998644
NONMMUT009850	non-coding	Atp8a2	coding	0.997904
ENSMUST00000134248	non-coding	Atp9a	coding	0.997068
NONMMUT033152	non-coding	Atp9a	coding	0.999431
NONMMUT055621	non-coding	Atp9a	coding	0.997517
NONMMUT009850	non-coding	Atpaf1	coding	0.997822
ENSMUST00000128702	non-coding	AW555464	coding	0.999609
NONMMUT000228	non-coding	B630019K06Rik	coding	0.997367
NONMMUT021286	non-coding	B630019K06Rik	coding	0.998627
NONMMUT035870	non-coding	B630019K06Rik	coding	-0.998656
NONMMUT054688	non-coding	B630019K06Rik	coding	0.997088
NONMMUT024027	non-coding	Bai1	coding	0.998989
NONMMUT074698	non-coding	Bai1	coding	-0.997399
NONMMUT001279	non-coding	Bai3	coding	-0.999457
NONMMUT030206	non-coding	Bai3	coding	0.998839
NONMMUT032391	non-coding	Bai3	coding	0.998583
NONMMUT052212	non-coding	Bai3	coding	0.998451
NONMMUT057511	non-coding	Bai3	coding	0.997953
NONMMUT025385	non-coding	Bak1	coding	-0.997242
NONMMUT073155	non-coding	Bak1	coding	0.997899
NONMMUT021910	non-coding	BC018242	coding	0.997889
NONMMUT051642	non-coding	BC018242	coding	0.999163
ENSMUST00000146204	non-coding	Bend6	coding	0.997304
NONMMUT045141	non-coding	Bend6	coding	0.997511
NONMMUT068903	non-coding	Bend6	coding	-0.997915
ENSMUST00000125782	non-coding	Bend7	coding	0.997103
NONMMUT061402	non-coding	Bend7	coding	0.998186
NONMMUT061403	non-coding	Bend7	coding	0.998595
NONMMUT061426	non-coding	Bend7	coding	0.99708
ENSMUST00000148824	non-coding	Bex1	coding	-0.999891
NONMMUT053428	non-coding	Bex1	coding	-0.998569
ENSMUST00000155361	non-coding	Bex2	coding	0.999416
NONMMUT009850	non-coding	Bicd1	coding	0.999341
ENSMUST00000155823	non-coding	Birc5	coding	-0.999909
NONMMUT064537	non-coding	Birc5	coding	-0.997466
ENSMUST00000154999	non-coding	Bnip2	coding	0.99872
NONMMUT067432	non-coding	Bnip2	coding	-0.998371
NONMMUT009850	non-coding	Brsk2	coding	0.997083
NONMMUT035870	non-coding	Brsk2	coding	-0.997979
NONMMUT061402	non-coding	Bsn	coding	0.998825
NONMMUT061403	non-coding	Bsn	coding	0.998909
NONMMUT007331	non-coding	Bst1	coding	0.998507
NONMMUT051355	non-coding	Bst1	coding	-0.998191
NONMMUT057237	non-coding	Bst1	coding	-0.999656
NONMMUT063537	non-coding	Bst1	coding	-0.997231
NONMMUT009847	non-coding	Btbd11	coding	0.998075
NONMMUT020189	non-coding	Btbd11	coding	0.997589
NONMMUT023388	non-coding	Btg1	coding	-0.999198
NONMMUT061714	non-coding	Btg1	coding	-0.997528
NONMMUT042291	non-coding	C3ar1	coding	-0.998847
n414332	non-coding	Cabp7	coding	0.99819
NONMMUT025385	non-coding	Cacfd1	coding	0.997049
NONMMUT026612	non-coding	Cacfd1	coding	0.997784
NONMMUT043579	non-coding	Cacfd1	coding	0.999591
n274811	non-coding	Cacna1b	coding	0.998458
NONMMUT021913	non-coding	Cacna1b	coding	0.99997
ENSMUST00000145363	non-coding	Cacna1e	coding	0.999931
ENSMUST00000149165	non-coding	Cacna1e	coding	0.998669
NONMMUT001318	non-coding	Cacna1e	coding	0.998117
NONMMUT042289	non-coding	Cacna1e	coding	0.997949
NONMMUT045895	non-coding	Cacna1e	coding	0.997858
NONMMUT054688	non-coding	Cacna1e	coding	0.997474
NONMMUT055492	non-coding	Cacna1e	coding	0.998839
NONMMUT000228	non-coding	Cacna2d2	coding	0.997745
NONMMUT007967	non-coding	Cacna2d2	coding	0.99704
NONMMUT035870	non-coding	Cacna2d2	coding	-0.999608
NONMMUT013797	non-coding	Cacnb2	coding	-0.997081
NONMMUT051223	non-coding	Cacnb2	coding	0.998331
ENSMUST00000150347	non-coding	Cadm3	coding	0.998103
NONMMUT061402	non-coding	Cadm3	coding	0.997008
ENSMUST00000138093	non-coding	Cadps	coding	0.997795
NONMMUT009847	non-coding	Cadps	coding	0.998657
NONMMUT020189	non-coding	Cadps	coding	0.998488
ENSMUST00000135943	non-coding	Calb1	coding	0.997752
NONMMUT010478	non-coding	Calb1	coding	0.997772
NONMMUT019913	non-coding	Calb1	coding	-0.998354
NONMMUT041963	non-coding	Calb1	coding	0.997082
NONMMUT042187	non-coding	Calb1	coding	0.99792
NONMMUT026766	non-coding	Calu	coding	0.997932
NONMMUT027268	non-coding	Calu	coding	-0.997802
NONMMUT061411	non-coding	Calu	coding	-0.997887
ENSMUST00000125782	non-coding	Caly	coding	0.997279
ENSMUST00000175979	non-coding	Caly	coding	0.997706
NONMMUT007967	non-coding	Caly	coding	0.997916
NONMMUT009850	non-coding	Camk1g	coding	0.997911
NONMMUT009850	non-coding	Camk2b	coding	0.998999
NONMMUT002429	non-coding	Camk2g	coding	0.999147
NONMMUT007331	non-coding	Camk2g	coding	-0.997003
NONMMUT026999	non-coding	Camk2g	coding	-0.999701
NONMMUT063537	non-coding	Camk2g	coding	0.997628
NONMMUT009850	non-coding	Camkk1	coding	0.998837
NONMMUT035870	non-coding	Camkk1	coding	-0.997796
ENSMUST00000135943	non-coding	Camkv	coding	0.997902
NONMMUT019913	non-coding	Camkv	coding	-0.998273
NONMMUT022571	non-coding	Camkv	coding	0.997645
NONMMUT024027	non-coding	Camsap3	coding	0.997638
ENSMUST00000172703	non-coding	Camta2	coding	0.998115
NONMMUT014102	non-coding	Camta2	coding	0.997494
NONMMUT032196	non-coding	Camta2	coding	0.997902
NONMMUT038129	non-coding	Camta2	coding	0.998451
ENSMUST00000125782	non-coding	Cap2	coding	0.998455
NONMMUT007967	non-coding	Cap2	coding	0.99798
NONMMUT061403	non-coding	Cap2	coding	0.997909
ENSMUST00000134248	non-coding	Capg	coding	-0.998216
NONMMUT021181	non-coding	Capg	coding	0.999075
NONMMUT021928	non-coding	Capg	coding	-0.999168
ENSMUST00000127164	non-coding	Car11	coding	0.998886
NONMMUT008131	non-coding	Car11	coding	-0.997433
NONMMUT035776	non-coding	Car11	coding	-0.997148
NONMMUT011045	non-coding	Car4	coding	0.999856
NONMMUT023865	non-coding	Car4	coding	0.997388
ENSMUST00000145363	non-coding	Caskin1	coding	0.997787
NONMMUT024027	non-coding	Caskin1	coding	0.999715
ENSMUST00000154999	non-coding	Casp8	coding	0.999313
NONMMUT067432	non-coding	Casp8	coding	-0.998382
NONMMUT027272	non-coding	Cav1	coding	-0.99708
NONMMUT056384	non-coding	Cav1	coding	-0.997322
NONMMUT068938	non-coding	Cav1	coding	-0.997043
NONMMUT024027	non-coding	Cbln1	coding	0.998354
NONMMUT074698	non-coding	Cbln1	coding	-0.997179
ENSMUST00000175979	non-coding	Cbln2	coding	0.999427
n274811	non-coding	Cbln2	coding	0.997433
NONMMUT021286	non-coding	Cbln2	coding	0.997411
NONMMUT074698	non-coding	Cbln2	coding	-0.999034
NONMMUT024027	non-coding	Ccdc149	coding	0.997717
NONMMUT001312	non-coding	Ccdc19	coding	-0.997456
NONMMUT005549	non-coding	Ccdc19	coding	-0.999845
NONMMUT027201	non-coding	Ccdc19	coding	-0.998938
NONMMUT027445	non-coding	Ccdc19	coding	-0.997072
NONMMUT011045	non-coding	Ccdc8	coding	0.998496
NONMMUT023865	non-coding	Ccdc8	coding	0.998317
ENSMUST00000127164	non-coding	Ccdc85a	coding	0.997191
NONMMUT001279	non-coding	Ccdc85a	coding	-0.997863
NONMMUT057511	non-coding	Ccdc85a	coding	0.99925
NONMMUT066531	non-coding	Ccdc85a	coding	0.999418
ENSMUST00000155823	non-coding	Cck	coding	0.999806
NONMMUT009579	non-coding	Cck	coding	0.99757
NONMMUT064537	non-coding	Cck	coding	0.998781
NONMMUT019670	non-coding	Cckbr	coding	0.997873
NONMMUT023865	non-coding	Cckbr	coding	0.99888
NONMMUT057509	non-coding	Cckbr	coding	0.997402
ENSMUST00000126588	non-coding	Ccr1	coding	0.997685
NONMMUT000399	non-coding	Ccr1	coding	-0.997773
NONMMUT027569	non-coding	Ccr1	coding	-0.998581
NONMMUT051225	non-coding	Ccr1	coding	-0.997443
NONMMUT049701	non-coding	Cd109	coding	-0.997387
n268066	non-coding	Cd180	coding	-0.998122
NONMMUT014102	non-coding	Cd180	coding	-0.99735
NONMMUT023864	non-coding	Cd180	coding	-0.99822
NONMMUT049810	non-coding	Cd180	coding	-0.998177
ENSMUST00000137657	non-coding	Cd300ld	coding	0.99708
ENSMUST00000155361	non-coding	Cd300ld	coding	-0.997139
NONMMUT048370	non-coding	Cd300ld	coding	-0.997928
NONMMUT062609	non-coding	Cd300ld	coding	-0.997102
ENSMUST00000125559	non-coding	Cd53	coding	-0.99734
NONMMUT061936	non-coding	Cd84	coding	-0.997201
NONMMUT073256	non-coding	Cd84	coding	0.997334
NONMMUT009850	non-coding	Cd93	coding	-0.999185
ENSMUST00000128702	non-coding	Cdca7l	coding	-0.998772
ENSMUST00000133187	non-coding	Cdh10	coding	-0.998971
NONMMUT023869	non-coding	Cdh10	coding	0.998009
ENSMUST00000147410	non-coding	Cdh12	coding	0.997081
NONMMUT004524	non-coding	Cdh12	coding	0.998005
NONMMUT021734	non-coding	Cdh12	coding	0.997947
NONMMUT023864	non-coding	Cdh12	coding	0.997434
NONMMUT049810	non-coding	Cdh12	coding	0.999447
NONMMUT067432	non-coding	Cdh12	coding	0.997496
ENSMUST00000154999	non-coding	Cdh7	coding	-0.997895
NONMMUT000228	non-coding	Cdh7	coding	0.997579
ENSMUST00000175979	non-coding	Cdh8	coding	0.997257
NONMMUT020411	non-coding	Cdh8	coding	0.998012
NONMMUT022571	non-coding	Cdh8	coding	0.999892
NONMMUT026613	non-coding	Cdh8	coding	0.998349
NONMMUT050612	non-coding	Cdh8	coding	0.998375
NONMMUT074698	non-coding	Cdh8	coding	-0.997722
ENSMUST00000134248	non-coding	Cdk2	coding	-0.999474
NONMMUT021181	non-coding	Cdk2	coding	0.998612
NONMMUT048391	non-coding	Cdk2	coding	-0.997224
ENSMUST00000145363	non-coding	Cdk5r1	coding	0.999739
ENSMUST00000149165	non-coding	Cdk5r1	coding	0.998164
NONMMUT001318	non-coding	Cdk5r1	coding	0.997363
NONMMUT042289	non-coding	Cdk5r1	coding	0.998121
NONMMUT054688	non-coding	Cdk5r1	coding	0.997211
NONMMUT055492	non-coding	Cdk5r1	coding	0.99807
ENSMUST00000125782	non-coding	Cdkl1	coding	0.9992
NONMMUT007967	non-coding	Cdkl1	coding	0.997506
NONMMUT061403	non-coding	Cdkl1	coding	0.99936
NONMMUT000228	non-coding	Cds1	coding	0.997987
NONMMUT009850	non-coding	Cds1	coding	0.997431
NONMMUT013797	non-coding	Cdt1	coding	0.998725
NONMMUT032142	non-coding	Cdt1	coding	-0.997642
NONMMUT045163	non-coding	Cdt1	coding	-0.998276
NONMMUT051355	non-coding	Cdt1	coding	-0.997698
NONMMUT057237	non-coding	Cdt1	coding	-0.997419
NR_075074	non-coding	Cdt1	coding	-0.998278
n414332	non-coding	Cend1	coding	0.998003
ENSMUST00000129074	non-coding	Cenpa	coding	0.998239
NONMMUT009847	non-coding	Cenpa	coding	-0.999405
ENSMUST00000172703	non-coding	Chat	coding	0.999604
NONMMUT032196	non-coding	Chat	coding	0.999458
ENSMUST00000118146	non-coding	Chchd10	coding	-0.998492
ENSMUST00000131086	non-coding	Chchd10	coding	0.99875
NONMMUT009579	non-coding	Chic1	coding	0.999756
NONMMUT009850	non-coding	Chn1	coding	0.998257
ENSMUST00000129688	non-coding	Chrm2	coding	-0.997323
NONMMUT020189	non-coding	Chrm2	coding	0.999841
NONMMUT001318	non-coding	Chrna4	coding	0.997204
NONMMUT037278	non-coding	Chrna4	coding	0.997547
NONMMUT042289	non-coding	Chrna4	coding	0.997002
NONMMUT061607	non-coding	Chrna4	coding	0.997214
NONMMUT065328	non-coding	Chrna4	coding	0.998262
NONMMUT023864	non-coding	Chrna7	coding	0.997382
NONMMUT033152	non-coding	Chrnb2	coding	0.998498
NONMMUT020411	non-coding	Cit	coding	0.997334
NONMMUT024027	non-coding	Cit	coding	0.998616
NONMMUT050612	non-coding	Cit	coding	0.997308
NONMMUT055492	non-coding	Cit	coding	0.997654
NONMMUT074698	non-coding	Cit	coding	-0.997844
NONMMUT042187	non-coding	Clcn6	coding	0.999046
NONMMUT073591	non-coding	Clcn6	coding	0.998671
ENSMUST00000139975	non-coding	Clec2i	coding	-0.998057
NONMMUT006523	non-coding	Clec4d	coding	-0.997648
NONMMUT032664	non-coding	Clec4d	coding	0.998463
NONMMUT067800	non-coding	Clec4d	coding	-0.997804
NONMMUT014378	non-coding	Clec5a	coding	-0.997954
NONMMUT001312	non-coding	Clic1	coding	-0.999723
ENSMUST00000148824	non-coding	Clip4	coding	-0.999625
NONMMUT053428	non-coding	Clip4	coding	-0.998057
NONMMUT009850	non-coding	Clstn1	coding	0.998293
NONMMUT020189	non-coding	Clstn1	coding	0.99724
NONMMUT000228	non-coding	Clstn2	coding	0.99728
NONMMUT001318	non-coding	Clstn2	coding	0.997734
NONMMUT037278	non-coding	Clstn2	coding	0.997833
NONMMUT054688	non-coding	Clstn2	coding	0.997359
n414332	non-coding	Clstn3	coding	0.99816
ENSMUST00000118146	non-coding	Clvs2	coding	-0.998758
NONMMUT015202	non-coding	Clvs2	coding	0.997523
NONMMUT002429	non-coding	Cndp2	coding	-0.998356
NONMMUT026999	non-coding	Cndp2	coding	0.999245
NONMMUT012277	non-coding	Cnn2	coding	0.999497
NONMMUT009850	non-coding	Cnnm1	coding	0.998283
NONMMUT009579	non-coding	Cnr1	coding	0.997403
NONMMUT054688	non-coding	Cnr1	coding	0.997405
NONMMUT025385	non-coding	Cntfr	coding	0.999513
NONMMUT026612	non-coding	Cntfr	coding	0.999225
NONMMUT042289	non-coding	Cntfr	coding	0.997114
NONMMUT065328	non-coding	Cntfr	coding	0.997283
NONMMUT011837	non-coding	Cntn3	coding	0.997743
NONMMUT014102	non-coding	Cntn3	coding	0.998279
NONMMUT023864	non-coding	Cntn3	coding	0.999982
NONMMUT049810	non-coding	Cntn3	coding	0.999063
NONMMUT001318	non-coding	Cntn4	coding	0.99832
NONMMUT007331	non-coding	Cntn4	coding	-0.997667
NONMMUT037278	non-coding	Cntn4	coding	0.997536
NONMMUT063537	non-coding	Cntn4	coding	0.99778
NONMMUT055912	non-coding	Cntn6	coding	0.997498
NONMMUT009847	non-coding	Cntnap1	coding	0.99701
NONMMUT023388	non-coding	Col4a2	coding	-0.997717
NONMMUT074526	non-coding	Col4a2	coding	0.998253
ENSMUST00000175979	non-coding	Coro2b	coding	0.99814
NONMMUT024027	non-coding	Coro2b	coding	0.999239
NONMMUT074698	non-coding	Coro2b	coding	-0.999266
NONMMUT000228	non-coding	Coro6	coding	0.998429
NONMMUT021286	non-coding	Coro6	coding	0.99905
NONMMUT035870	non-coding	Coro6	coding	-0.99882
NONMMUT054688	non-coding	Coro6	coding	0.998325
NONMMUT048391	non-coding	Cotl1	coding	-0.99952
NONMMUT002429	non-coding	Cpeb3	coding	0.997605
NONMMUT009579	non-coding	Cpeb3	coding	0.997248
NONMMUT037278	non-coding	Cpeb3	coding	0.998772
NONMMUT061607	non-coding	Cpeb3	coding	0.997809
NONMMUT011837	non-coding	Cplx2	coding	0.99839
NONMMUT014102	non-coding	Cplx2	coding	0.997627
NONMMUT023864	non-coding	Cplx2	coding	0.999743
NONMMUT049810	non-coding	Cplx2	coding	0.99951
ENSMUST00000145363	non-coding	Cpne4	coding	0.999029
ENSMUST00000149165	non-coding	Cpne4	coding	0.997482
ENSMUST00000175979	non-coding	Cpne4	coding	0.997713
NONMMUT021286	non-coding	Cpne4	coding	0.997215
NONMMUT024027	non-coding	Cpne4	coding	0.998903
NONMMUT045895	non-coding	Cpne4	coding	0.99782
NONMMUT055492	non-coding	Cpne4	coding	0.99825
ENSMUST00000145363	non-coding	Cpne6	coding	0.998667
ENSMUST00000149165	non-coding	Cpne6	coding	0.999291
NONMMUT001318	non-coding	Cpne6	coding	0.998811
NONMMUT020411	non-coding	Cpne6	coding	0.99783
NONMMUT042289	non-coding	Cpne6	coding	0.997269
NONMMUT045895	non-coding	Cpne6	coding	0.999273
NONMMUT055492	non-coding	Cpne6	coding	0.999739
NONMMUT055912	non-coding	Cpne9	coding	0.998374
ENSMUST00000172703	non-coding	Cpox	coding	0.998049
n279396	non-coding	Cpox	coding	0.998414
NONMMUT032196	non-coding	Cpox	coding	0.998418
NONMMUT042289	non-coding	Cpox	coding	0.997138
NONMMUT065328	non-coding	Cpox	coding	0.997808
ENSMUST00000172703	non-coding	Creg2	coding	0.999311
NONMMUT032196	non-coding	Creg2	coding	0.99933
NONMMUT065328	non-coding	Creg2	coding	0.998294
NONMMUT027268	non-coding	Crip1	coding	-0.998943
ENSMUST00000128702	non-coding	Crmp1	coding	0.9979
ENSMUST00000131086	non-coding	Crmp1	coding	0.997402
NONMMUT014378	non-coding	Crtac1	coding	0.999157
NONMMUT021913	non-coding	Crtac1	coding	0.998019
NONMMUT072615	non-coding	Crtac1	coding	0.999228
ENSMUST00000128702	non-coding	Csdc2	coding	0.997557
ENSMUST00000131086	non-coding	Csdc2	coding	0.997245
NONMMUT014378	non-coding	Csf2rb	coding	-0.998745
NONMMUT072615	non-coding	Csf2rb	coding	-0.997655
ENSMUST00000110989	non-coding	Csf2rb2	coding	0.999308
NONMMUT014378	non-coding	Csf2rb2	coding	-0.999284
NONMMUT021926	non-coding	Csf2rb2	coding	-0.998544
NONMMUT072615	non-coding	Csf2rb2	coding	-0.999009
NONMMUT025385	non-coding	Cstb	coding	-0.997797
NONMMUT026612	non-coding	Cstb	coding	-0.997838
NONMMUT043579	non-coding	Cstb	coding	-0.997329
NONMMUT063537	non-coding	Cstb	coding	-0.997649
NONMMUT042291	non-coding	Ctsc	coding	-0.997572
NONMMUT067081	non-coding	Ctsc	coding	-0.997753
NONMMUT000228	non-coding	Ctsl	coding	-0.998816
ENSMUST00000135195	non-coding	Cx3cl1	coding	-0.997213
NONMMUT004432	non-coding	Cx3cl1	coding	0.998363
NONMMUT032664	non-coding	Cx3cl1	coding	-0.998814
NONMMUT067800	non-coding	Cx3cl1	coding	0.999038
ENSMUST00000149165	non-coding	Cxxc4	coding	0.997539
n279396	non-coding	Cxxc4	coding	0.998265
NONMMUT005924	non-coding	Cxxc4	coding	0.997871
NONMMUT026612	non-coding	Cxxc4	coding	0.998319
ENSMUST00000155361	non-coding	Cyb561	coding	0.998553
NONMMUT062609	non-coding	Cyb561	coding	0.999355
NONMMUT005432	non-coding	Cyba	coding	0.997545
NONMMUT073256	non-coding	Cyba	coding	0.999665
NONMMUT000228	non-coding	Cyfip2	coding	0.997976
NONMMUT001318	non-coding	Cyfip2	coding	0.99754
NONMMUT037278	non-coding	Cyfip2	coding	0.997157
NONMMUT054688	non-coding	Cyfip2	coding	0.99811
ENSMUST00000145363	non-coding	Cyp46a1	coding	0.998424
ENSMUST00000149165	non-coding	Cyp46a1	coding	0.997404
NONMMUT042289	non-coding	Cyp46a1	coding	0.999006
NONMMUT065328	non-coding	Cyp46a1	coding	0.998287
NONMMUT012277	non-coding	Cyp51	coding	-0.997117
NONMMUT073256	non-coding	Cyp51	coding	-0.998516
NONMMUT073256	non-coding	Cyth4	coding	0.998602
NONMMUT012277	non-coding	Cytip	coding	0.997814
ENSMUST00000155823	non-coding	D3Bwg0562e	coding	0.997829
ENSMUST00000128702	non-coding	D930014E17Rik	coding	-0.999335
NONMMUT012808	non-coding	Dab1	coding	0.997344
NONMMUT068903	non-coding	Dab1	coding	-0.997633
ENSMUST00000128849	non-coding	Dap	coding	0.998362
NONMMUT005432	non-coding	Dap	coding	0.997475
NONMMUT055621	non-coding	Dap	coding	-0.997801
NONMMUT001318	non-coding	Dbc1	coding	0.997114
NONMMUT002429	non-coding	Dbc1	coding	0.998447
NONMMUT007331	non-coding	Dbc1	coding	-0.998564
NONMMUT026999	non-coding	Dbc1	coding	-0.99813
NONMMUT037278	non-coding	Dbc1	coding	0.998669
NONMMUT063537	non-coding	Dbc1	coding	0.999417
n286573	non-coding	Dcaf12l1	coding	0.997594
ENSMUST00000123548	non-coding	Dclk2	coding	0.997529
ENSMUST00000140605	non-coding	Dclk2	coding	0.99785
NONMMUT005544	non-coding	Dclk2	coding	0.99792
n286573	non-coding	Dclk3	coding	0.998851
NONMMUT010478	non-coding	Dclk3	coding	0.998082
ENSMUST00000118146	non-coding	Dcun1d4	coding	-0.997576
ENSMUST00000131086	non-coding	Dcun1d4	coding	0.998891
NONMMUT061402	non-coding	Dcun1d4	coding	0.998698
NONMMUT061403	non-coding	Dcun1d4	coding	0.997509
ENSMUST00000145363	non-coding	Ddx25	coding	0.99869
ENSMUST00000149165	non-coding	Ddx25	coding	0.997663
NONMMUT042289	non-coding	Ddx25	coding	0.999126
NONMMUT065328	non-coding	Ddx25	coding	0.998369
ENSMUST00000145363	non-coding	Dennd5b	coding	0.998617
ENSMUST00000149165	non-coding	Dennd5b	coding	0.997441
NONMMUT042289	non-coding	Dennd5b	coding	0.997993
NONMMUT024407	non-coding	Dgkb	coding	0.99909
NONMMUT026999	non-coding	Dgkb	coding	-0.997036
NONMMUT000228	non-coding	Dgke	coding	0.998966
NONMMUT054688	non-coding	Dgke	coding	0.997312
ENSMUST00000145363	non-coding	Dgkg	coding	0.997608
ENSMUST00000149165	non-coding	Dgkg	coding	0.998245
NONMMUT001318	non-coding	Dgkg	coding	0.999705
NONMMUT042289	non-coding	Dgkg	coding	0.997511
NONMMUT045895	non-coding	Dgkg	coding	0.997592
NONMMUT055492	non-coding	Dgkg	coding	0.998482
NONMMUT063537	non-coding	Dgkg	coding	0.998016
NONMMUT005549	non-coding	Dgkk	coding	0.999114
NONMMUT027201	non-coding	Dgkk	coding	0.998466
NONMMUT049701	non-coding	Dgkk	coding	0.997629
NONMMUT005432	non-coding	Dhcr24	coding	-0.997196
NONMMUT062345	non-coding	Diras1	coding	0.997431
NONMMUT009850	non-coding	Diras2	coding	0.998437
NONMMUT033152	non-coding	Dlg4	coding	0.997342
ENSMUST00000145363	non-coding	Dlgap1	coding	0.997814
ENSMUST00000175979	non-coding	Dlgap1	coding	0.997673
NONMMUT001318	non-coding	Dlgap1	coding	0.998587
NONMMUT021286	non-coding	Dlgap1	coding	0.998688
NONMMUT045895	non-coding	Dlgap1	coding	0.997584
NONMMUT055492	non-coding	Dlgap1	coding	0.998225
ENSMUST00000145363	non-coding	Dlgap2	coding	0.999172
ENSMUST00000149165	non-coding	Dlgap2	coding	0.997774
NONMMUT024027	non-coding	Dlgap2	coding	0.998109
NONMMUT045895	non-coding	Dlgap2	coding	0.997188
NONMMUT055492	non-coding	Dlgap2	coding	0.997894
NONMMUT062345	non-coding	Dlgap3	coding	0.999009
ENSMUST00000137153	non-coding	Dlk1	coding	0.997596
NONMMUT033152	non-coding	Dlk1	coding	0.999283
NONMMUT009850	non-coding	Dnajc27	coding	0.997668
NONMMUT009850	non-coding	Dnajc6	coding	0.997207
NONMMUT035870	non-coding	Dnajc6	coding	-0.997163
NONMMUT007331	non-coding	Dner	coding	-0.999655
NONMMUT057237	non-coding	Dner	coding	0.998842
NONMMUT063537	non-coding	Dner	coding	0.998854
ENSMUST00000118146	non-coding	Dnm3	coding	-0.998364
ENSMUST00000131086	non-coding	Dnm3	coding	0.998616
NONMMUT042187	non-coding	Dnm3	coding	0.998184
NONMMUT073591	non-coding	Dnm3	coding	0.997509
NONMMUT042187	non-coding	Dock3	coding	0.997839
NONMMUT073591	non-coding	Dock3	coding	0.997877
NONMMUT009850	non-coding	Dpp10	coding	0.999218
NONMMUT020189	non-coding	Dpp6	coding	0.997674
ENSMUST00000153025	non-coding	Dpysl5	coding	0.997316
NONMMUT023865	non-coding	Drd2	coding	0.9971
ENSMUST00000172703	non-coding	Dscam	coding	0.99934
NONMMUT032196	non-coding	Dscam	coding	0.999243
NONMMUT024027	non-coding	Dtx1	coding	0.998563
NONMMUT074698	non-coding	Dtx1	coding	-0.997848
NONMMUT033184	non-coding	Dusp15	coding	-0.997354
NONMMUT038129	non-coding	Dusp15	coding	0.999114
NONMMUT069567	non-coding	Dusp15	coding	0.998708
NONMMUT000228	non-coding	Dusp8	coding	0.997303
NONMMUT009850	non-coding	Dusp8	coding	0.997911
NONMMUT035870	non-coding	Dusp8	coding	-0.997045
NONMMUT018743	non-coding	Dzip1	coding	0.999252
NONMMUT026644	non-coding	Dzip1	coding	0.998055
NONMMUT061607	non-coding	Dzip1	coding	0.997575
NONMMUT069567	non-coding	Dzip1	coding	0.998346
NONMMUT073155	non-coding	Dzip1	coding	-0.998207
NONMMUT002429	non-coding	E130309F12Rik	coding	0.999351
NONMMUT026999	non-coding	E130309F12Rik	coding	-0.999153
ENSMUST00000126791	non-coding	Ebf3	coding	0.997943
NONMMUT014958	non-coding	Ebf3	coding	0.999777
NONMMUT018492	non-coding	Ebf3	coding	-0.997447
NONMMUT032959	non-coding	Ebf3	coding	0.999315
NONMMUT051355	non-coding	Ebf3	coding	0.997835
NONMMUT021181	non-coding	Ecm1	coding	0.998829
NONMMUT021928	non-coding	Ecm1	coding	-0.999379
NONMMUT009104	non-coding	Edem1	coding	-0.997394
NONMMUT048370	non-coding	Eef1a2	coding	0.998499
ENSMUST00000136843	non-coding	Efhd1	coding	-0.998088
NONMMUT015949	non-coding	Efhd1	coding	0.99913
NONMMUT017064	non-coding	Efhd1	coding	-0.997589
NONMMUT037072	non-coding	Efhd1	coding	0.997299
ENSMUST00000150347	non-coding	Efnb3	coding	0.997453
n275269	non-coding	Efnb3	coding	0.997532
NONMMUT029762	non-coding	Efnb3	coding	-0.997632
NONMMUT061402	non-coding	Efnb3	coding	0.99828
NONMMUT001318	non-coding	Ehd4	coding	-0.998705
NONMMUT002429	non-coding	Ehd4	coding	-0.997443
NONMMUT007331	non-coding	Ehd4	coding	0.998692
NONMMUT037278	non-coding	Ehd4	coding	-0.998958
NONMMUT063537	non-coding	Ehd4	coding	-0.999492
ENSMUST00000124186	non-coding	Eif2ak2	coding	-0.997602
ENSMUST00000137153	non-coding	Eif5a2	coding	0.997085
NONMMUT000228	non-coding	Elavl2	coding	0.997074
NONMMUT007967	non-coding	Elavl2	coding	0.99777
NONMMUT035870	non-coding	Elavl2	coding	-0.999447
ENSMUST00000145363	non-coding	Elavl4	coding	0.997845
NONMMUT001318	non-coding	Elavl4	coding	0.999647
NONMMUT021286	non-coding	Elavl4	coding	0.997508
NONMMUT054688	non-coding	Elavl4	coding	0.997488
NONMMUT055492	non-coding	Elavl4	coding	0.997498
NONMMUT063537	non-coding	Elavl4	coding	0.997018
NONMMUT005432	non-coding	Elf4	coding	0.997746
NONMMUT012277	non-coding	Elk3	coding	0.998373
ENSMUST00000138093	non-coding	Elmod1	coding	0.997635
NONMMUT009847	non-coding	Elmod1	coding	0.997904
NONMMUT020189	non-coding	Elmod1	coding	0.998723
ENSMUST00000149165	non-coding	Elovl2	coding	0.997869
NONMMUT020411	non-coding	Elovl2	coding	0.997284
NONMMUT024027	non-coding	Elovl2	coding	0.997926
NONMMUT045895	non-coding	Elovl2	coding	0.998483
NONMMUT050612	non-coding	Elovl2	coding	0.997179
NONMMUT055492	non-coding	Elovl2	coding	0.997933
ENSMUST00000147410	non-coding	Elovl6	coding	0.997942
NONMMUT004524	non-coding	Elovl6	coding	0.998448
NONMMUT021734	non-coding	Elovl6	coding	0.999222
NONMMUT021928	non-coding	Elovl6	coding	0.998431
NONMMUT067432	non-coding	Elovl6	coding	0.997544
NONMMUT031134	non-coding	Emp3	coding	-0.998617
NONMMUT068540	non-coding	Emp3	coding	-0.997939
NONMMUT061936	non-coding	Emr1	coding	-0.999041
NONMMUT073256	non-coding	Emr1	coding	0.998428
ENSMUST00000128702	non-coding	Enah	coding	0.999845
ENSMUST00000131086	non-coding	Enah	coding	0.997731
ENSMUST00000155361	non-coding	Eno2	coding	0.997103
ENSMUST00000147162	non-coding	Enpp2	coding	-0.998368
NONMMUT016268	non-coding	Enpp2	coding	0.997709
NONMMUT027166	non-coding	Enpp2	coding	0.99746
NONMMUT038059	non-coding	Enpp2	coding	0.99981
NONMMUT047865	non-coding	Enpp2	coding	0.997225
ENSMUST00000126791	non-coding	Enpp5	coding	0.998081
ENSMUST00000136736	non-coding	Enpp5	coding	0.997002
NONMMUT014958	non-coding	Enpp5	coding	0.998491
NONMMUT032957	non-coding	Enpp5	coding	0.998739
NONMMUT032959	non-coding	Enpp5	coding	0.999355
NONMMUT051355	non-coding	Enpp5	coding	0.997074
Sec14l2	coding	ENSMUST00000085979	non-coding	0.997934
Frmpd3	coding	ENSMUST00000110989	non-coding	-0.99842
Ggta1	coding	ENSMUST00000110989	non-coding	0.997734
Kcnc3	coding	ENSMUST00000110989	non-coding	-0.998172
Kcnh2	coding	ENSMUST00000110989	non-coding	-0.997077
Lamp2	coding	ENSMUST00000110989	non-coding	0.998244
Parp9	coding	ENSMUST00000110989	non-coding	0.997828
Rps6ka2	coding	ENSMUST00000110989	non-coding	-0.997646
Sgpl1	coding	ENSMUST00000110989	non-coding	0.997089
Parm1	coding	ENSMUST00000123548	non-coding	0.997711
Wdr17	coding	ENSMUST00000123548	non-coding	0.998469
Grik1	coding	ENSMUST00000124186	non-coding	0.998335
Susd2	coding	ENSMUST00000126588	non-coding	-0.997422
Kcnk1	coding	ENSMUST00000126791	non-coding	0.99879
Lbx1	coding	ENSMUST00000126791	non-coding	0.999893
Nsg2	coding	ENSMUST00000126791	non-coding	0.998184
Pcdhb15	coding	ENSMUST00000126791	non-coding	0.998953
Zcchc12	coding	ENSMUST00000126791	non-coding	0.998882
Zfp454	coding	ENSMUST00000128109	non-coding	0.997303
Ermn	coding	ENSMUST00000128702	non-coding	0.997602
Glra3	coding	ENSMUST00000128702	non-coding	0.998782
Guk1	coding	ENSMUST00000128702	non-coding	0.997112
Nsg1	coding	ENSMUST00000128702	non-coding	0.997972
Pgbd5	coding	ENSMUST00000128702	non-coding	0.997431
Ppfia3	coding	ENSMUST00000128702	non-coding	0.998016
Reep1	coding	ENSMUST00000128702	non-coding	0.999402
Sncb	coding	ENSMUST00000128702	non-coding	0.99778
Tuba4a	coding	ENSMUST00000128702	non-coding	0.99723
Gpr183	coding	ENSMUST00000128849	non-coding	0.997074
Stab1	coding	ENSMUST00000128849	non-coding	0.998908
Faim2	coding	ENSMUST00000129074	non-coding	-0.999168
Gnl3l	coding	ENSMUST00000129074	non-coding	-0.997949
Nrn1	coding	ENSMUST00000129074	non-coding	-0.998369
Prepl	coding	ENSMUST00000129074	non-coding	-0.997628
Sepx1	coding	ENSMUST00000129074	non-coding	0.999463
Tspyl4	coding	ENSMUST00000129074	non-coding	-0.99819
Ttc39b	coding	ENSMUST00000129074	non-coding	-0.997707
Fgf1	coding	ENSMUST00000129688	non-coding	-0.999586
Gprasp1	coding	ENSMUST00000129688	non-coding	-0.997415
Gria1	coding	ENSMUST00000129688	non-coding	-0.999119
Hepacam	coding	ENSMUST00000129688	non-coding	-0.998513
Mal2	coding	ENSMUST00000129688	non-coding	-0.998213
Necab1	coding	ENSMUST00000129688	non-coding	-0.998733
Pnma2	coding	ENSMUST00000129688	non-coding	-0.99807
Rab3c	coding	ENSMUST00000129688	non-coding	-0.998206
Sphkap	coding	ENSMUST00000129688	non-coding	-0.997598
Zfp941	coding	ENSMUST00000129688	non-coding	-0.999526
Hist1h1d	coding	ENSMUST00000131250	non-coding	0.998416
Galnt13	coding	ENSMUST00000131602	non-coding	-0.999444
Pcdhb3	coding	ENSMUST00000131602	non-coding	-0.999651
Sdf2l1	coding	ENSMUST00000131602	non-coding	0.997008
Tac2	coding	ENSMUST00000131602	non-coding	-0.997721
Fbxo31	coding	ENSMUST00000134248	non-coding	0.998849
Kcnab2	coding	ENSMUST00000134248	non-coding	0.999604
Pgd	coding	ENSMUST00000134248	non-coding	-0.998749
Rac2	coding	ENSMUST00000134248	non-coding	-0.99703
Samsn1	coding	ENSMUST00000134248	non-coding	-0.99969
Sh3gl3	coding	ENSMUST00000134248	non-coding	0.999407
Slc25a24	coding	ENSMUST00000134248	non-coding	-0.999317
Tceal5	coding	ENSMUST00000134248	non-coding	0.998526
Tmpo	coding	ENSMUST00000134248	non-coding	-0.997844
Galnt13	coding	ENSMUST00000135195	non-coding	-0.997714
Ppargc1a	coding	ENSMUST00000135195	non-coding	-0.998221
Sdf2l1	coding	ENSMUST00000135195	non-coding	0.997413
Tac2	coding	ENSMUST00000135195	non-coding	-0.998325
Tom1l2	coding	ENSMUST00000135195	non-coding	-0.999776
Hoxb5	coding	ENSMUST00000135488	non-coding	0.999084
Olfr1161	coding	ENSMUST00000135488	non-coding	-0.997575
Smad9	coding	ENSMUST00000135488	non-coding	0.997096
Ssbp2	coding	ENSMUST00000135488	non-coding	0.997971
Kcnk1	coding	ENSMUST00000136736	non-coding	0.999357
Lbx1	coding	ENSMUST00000136736	non-coding	0.999295
Nsg2	coding	ENSMUST00000136736	non-coding	0.998102
Pcdhb15	coding	ENSMUST00000136736	non-coding	0.999089
Zcchc12	coding	ENSMUST00000136736	non-coding	0.99977
Gstm7	coding	ENSMUST00000137657	non-coding	-0.997149
Guk1	coding	ENSMUST00000137657	non-coding	-0.997272
Mapk8ip2	coding	ENSMUST00000137657	non-coding	-0.998599
Mcf2l	coding	ENSMUST00000137657	non-coding	-0.997342
Nefm	coding	ENSMUST00000137657	non-coding	-0.998785
Rtn2	coding	ENSMUST00000137657	non-coding	-0.998235
S1pr5	coding	ENSMUST00000137657	non-coding	-0.9978
Sh3bgrl	coding	ENSMUST00000137657	non-coding	0.998135
Tmx2	coding	ENSMUST00000137657	non-coding	-0.999305
Uchl1	coding	ENSMUST00000137657	non-coding	-0.997321
Fgf1	coding	ENSMUST00000138093	non-coding	0.999501
Gria1	coding	ENSMUST00000138093	non-coding	0.997191
Necab1	coding	ENSMUST00000138093	non-coding	0.997829
Pnma2	coding	ENSMUST00000138093	non-coding	0.998954
Rab3c	coding	ENSMUST00000138093	non-coding	0.997054
Sphkap	coding	ENSMUST00000138093	non-coding	0.998222
Zfp941	coding	ENSMUST00000138093	non-coding	0.99741
Syt5	coding	ENSMUST00000139975	non-coding	0.997318
Prkaa2	coding	ENSMUST00000140047	non-coding	0.997011
Scn3b	coding	ENSMUST00000140047	non-coding	0.999611
Spire2	coding	ENSMUST00000140047	non-coding	0.997985
Plaur	coding	ENSMUST00000140605	non-coding	-0.998518
Sec14l2	coding	ENSMUST00000140605	non-coding	0.998397
Gprc5b	coding	ENSMUST00000141677	non-coding	0.998574
Olfr1161	coding	ENSMUST00000141677	non-coding	-0.998226
Fam123c	coding	ENSMUST00000145363	non-coding	0.999763
Fbxw7	coding	ENSMUST00000145363	non-coding	0.997079
Fsd1	coding	ENSMUST00000145363	non-coding	0.998132
Gad1	coding	ENSMUST00000145363	non-coding	0.997983
Gpr162	coding	ENSMUST00000145363	non-coding	0.997273
Gpr37	coding	ENSMUST00000145363	non-coding	0.997201
Grin2a	coding	ENSMUST00000145363	non-coding	0.998575
Hecw2	coding	ENSMUST00000145363	non-coding	0.998594
Herc3	coding	ENSMUST00000145363	non-coding	0.999655
Kcnip2	coding	ENSMUST00000145363	non-coding	0.998639
Kifc2	coding	ENSMUST00000145363	non-coding	0.997358
Lmo3	coding	ENSMUST00000145363	non-coding	0.997464
Lrfn5	coding	ENSMUST00000145363	non-coding	0.99953
Mark1	coding	ENSMUST00000145363	non-coding	0.997045
Necab3	coding	ENSMUST00000145363	non-coding	0.99924
Ogfod1	coding	ENSMUST00000145363	non-coding	0.997815
P4hb	coding	ENSMUST00000145363	non-coding	-0.997413
Pde4a	coding	ENSMUST00000145363	non-coding	0.998747
Plch1	coding	ENSMUST00000145363	non-coding	0.999005
Plekha6	coding	ENSMUST00000145363	non-coding	0.998723
Rhbdl1	coding	ENSMUST00000145363	non-coding	0.998287
Rod1	coding	ENSMUST00000145363	non-coding	-0.998455
Rprd1a	coding	ENSMUST00000145363	non-coding	0.99742
Rtn1	coding	ENSMUST00000145363	non-coding	0.997425
Shd	coding	ENSMUST00000145363	non-coding	0.997367
Slc35f3	coding	ENSMUST00000145363	non-coding	0.999141
Slc4a3	coding	ENSMUST00000145363	non-coding	0.99892
Slc6a15	coding	ENSMUST00000145363	non-coding	0.99833
Slc6a9	coding	ENSMUST00000145363	non-coding	0.997046
Slitrk4	coding	ENSMUST00000145363	non-coding	0.998348
Slmo1	coding	ENSMUST00000145363	non-coding	0.998224
Stoml1	coding	ENSMUST00000145363	non-coding	0.997703
Tfpi2	coding	ENSMUST00000145363	non-coding	-0.997924
Tnk2	coding	ENSMUST00000145363	non-coding	0.99924
Extl2	coding	ENSMUST00000146204	non-coding	0.997089
Slc6a11	coding	ENSMUST00000146204	non-coding	0.998695
Vstm2b	coding	ENSMUST00000146204	non-coding	0.999163
Fam57b	coding	ENSMUST00000147410	non-coding	0.997048
Npl	coding	ENSMUST00000147410	non-coding	-0.999077
Rundc3b	coding	ENSMUST00000147410	non-coding	0.998608
Slc1a1	coding	ENSMUST00000147410	non-coding	0.998191
Tlr13	coding	ENSMUST00000147410	non-coding	-0.998416
Hist1h1d	coding	ENSMUST00000148824	non-coding	0.997687
Podxl2	coding	ENSMUST00000148824	non-coding	-0.998064
Flt3	coding	ENSMUST00000153025	non-coding	0.997883
Fstl4	coding	ENSMUST00000153025	non-coding	0.997315
Lrrn2	coding	ENSMUST00000153025	non-coding	0.998554
Madd	coding	ENSMUST00000153025	non-coding	0.997415
Oprk1	coding	ENSMUST00000153025	non-coding	0.998946
Slc27a2	coding	ENSMUST00000153025	non-coding	0.997595
Spink10	coding	ENSMUST00000153025	non-coding	0.997647
Wnk2	coding	ENSMUST00000153025	non-coding	0.99738
Snx32	coding	ENSMUST00000154476	non-coding	-0.999285
Thrsp	coding	ENSMUST00000154476	non-coding	-0.99722
Zfp454	coding	ENSMUST00000154476	non-coding	-0.999562
Gprc5b	coding	ENSMUST00000154771	non-coding	0.999947
Olfr1161	coding	ENSMUST00000154771	non-coding	-0.999553
Tceal1	coding	ENSMUST00000154771	non-coding	0.998366
Fam57b	coding	ENSMUST00000154999	non-coding	-0.998258
Furin	coding	ENSMUST00000154999	non-coding	0.99777
Gpr22	coding	ENSMUST00000154999	non-coding	-0.998312
Gpx1	coding	ENSMUST00000154999	non-coding	0.997413
Kcnab3	coding	ENSMUST00000154999	non-coding	-0.998936
Maneal	coding	ENSMUST00000154999	non-coding	-0.999386
Map2k4	coding	ENSMUST00000154999	non-coding	-0.998798
Pppde2	coding	ENSMUST00000154999	non-coding	-0.999884
Slc5a7	coding	ENSMUST00000154999	non-coding	-0.997882
Snph	coding	ENSMUST00000154999	non-coding	-0.999762
Syt7	coding	ENSMUST00000154999	non-coding	-0.997414
Tmeff2	coding	ENSMUST00000154999	non-coding	-0.997221
Vwa5b2	coding	ENSMUST00000154999	non-coding	-0.997576
Impact	coding	ENSMUST00000155925	non-coding	0.998285
Olfr1411	coding	ENSMUST00000155925	non-coding	0.998243
Plxna4	coding	ENSMUST00000155925	non-coding	0.997505
Ppargc1a	coding	ENSMUST00000155925	non-coding	0.997391
Vstm2a	coding	ENSMUST00000155925	non-coding	0.99779
Zcchc12	coding	ENSMUST00000155925	non-coding	0.998255
Fam126b	coding	ENSMUST00000172703	non-coding	0.99835
Frmd5	coding	ENSMUST00000172703	non-coding	0.998476
Gm11428	coding	ENSMUST00000172703	non-coding	-0.997987
Gria4	coding	ENSMUST00000172703	non-coding	0.99744
Lingo4	coding	ENSMUST00000172703	non-coding	0.9996
Map4k2	coding	ENSMUST00000172703	non-coding	0.997143
Mcm3	coding	ENSMUST00000172703	non-coding	-0.99729
Ms4a6d	coding	ENSMUST00000172703	non-coding	-0.999837
Ppip5k1	coding	ENSMUST00000172703	non-coding	0.997706
Rap1gap	coding	ENSMUST00000172703	non-coding	0.99801
Sacs	coding	ENSMUST00000172703	non-coding	0.998796
Slc19a2	coding	ENSMUST00000172703	non-coding	0.999307
Slc9a7	coding	ENSMUST00000172703	non-coding	0.99802
Slitrk3	coding	ENSMUST00000172703	non-coding	0.998718
Tmem35	coding	ENSMUST00000172703	non-coding	0.99783
Trhr	coding	ENSMUST00000172703	non-coding	0.997963
Trpc7	coding	ENSMUST00000172703	non-coding	0.997951
Zer1	coding	ENSMUST00000172703	non-coding	0.999565
Entpd3	coding	ENSMUST00000175979	non-coding	0.998549
Fam116b	coding	ENSMUST00000175979	non-coding	0.999248
Fsd1	coding	ENSMUST00000175979	non-coding	0.999094
Herc3	coding	ENSMUST00000175979	non-coding	0.997192
Magee1	coding	ENSMUST00000175979	non-coding	0.997856
Mark1	coding	ENSMUST00000175979	non-coding	0.999215
Mast1	coding	ENSMUST00000175979	non-coding	0.997413
Mcf2	coding	ENSMUST00000175979	non-coding	0.999548
Mdga2	coding	ENSMUST00000175979	non-coding	0.998285
Meg3	coding	ENSMUST00000175979	non-coding	0.999816
N28178	coding	ENSMUST00000175979	non-coding	0.997796
Nol4	coding	ENSMUST00000175979	non-coding	0.99996
Nrxn2	coding	ENSMUST00000175979	non-coding	0.999458
Pclo	coding	ENSMUST00000175979	non-coding	0.997907
Pgr	coding	ENSMUST00000175979	non-coding	0.997513
Reep6	coding	ENSMUST00000175979	non-coding	0.998516
Rhbdl1	coding	ENSMUST00000175979	non-coding	0.998744
Rprd1a	coding	ENSMUST00000175979	non-coding	0.997797
Rusc1	coding	ENSMUST00000175979	non-coding	0.998402
Slc4a3	coding	ENSMUST00000175979	non-coding	0.99894
Slc6a9	coding	ENSMUST00000175979	non-coding	0.998217
Tesc	coding	ENSMUST00000175979	non-coding	0.999869
Tmcc2	coding	ENSMUST00000175979	non-coding	0.998048
Tnk2	coding	ENSMUST00000175979	non-coding	0.997755
Trpc1	coding	ENSMUST00000175979	non-coding	0.998261
Tubg2	coding	ENSMUST00000175979	non-coding	0.999747
Slc1a1	coding	ENSMUST00000176122	non-coding	0.997348
Tcp11l1	coding	ENSMUST00000176122	non-coding	0.997519
Tmem163	coding	ENSMUST00000176122	non-coding	0.99805
NONMMUT021286	non-coding	Entpd3	coding	0.998774
NONMMUT035870	non-coding	Entpd3	coding	-0.997917
ENSMUST00000155361	non-coding	Epb4.1l1	coding	0.99757
NONMMUT021734	non-coding	Epb4.1l3	coding	0.997595
NONMMUT021928	non-coding	Epb4.1l3	coding	0.997921
NONMMUT064537	non-coding	Epb4.1l3	coding	0.997479
NONMMUT035870	non-coding	Epb4.9	coding	-0.997592
NONMMUT042187	non-coding	Epb4.9	coding	0.998065
NONMMUT073591	non-coding	Epb4.9	coding	0.997142
ENSMUST00000147162	non-coding	Epha5	coding	-0.997378
NONMMUT009312	non-coding	Epha5	coding	0.997269
NONMMUT023869	non-coding	Epha5	coding	0.997097
NONMMUT068245	non-coding	Epha5	coding	0.997429
NONMMUT070203	non-coding	Epha5	coding	0.997767
n279396	non-coding	Epha6	coding	0.999153
NONMMUT027269	non-coding	Ephb1	coding	0.997239
NONMMUT055912	non-coding	Ephb1	coding	0.997332
NONMMUT025385	non-coding	Epm2aip1	coding	0.997694
NONMMUT026612	non-coding	Epm2aip1	coding	0.997377
NONMMUT065328	non-coding	Epm2aip1	coding	0.998181
ENSMUST00000131086	non-coding	Ermn	coding	0.998074
NONMMUT005138	non-coding	Extl2	coding	0.997496
NONMMUT022574	non-coding	F13a1	coding	-0.99718
NONMMUT024407	non-coding	F13a1	coding	-0.997036
NONMMUT001312	non-coding	Faah	coding	0.997209
NONMMUT005549	non-coding	Faah	coding	0.997497
NONMMUT009297	non-coding	Faah	coding	0.998569
NONMMUT014775	non-coding	Faah	coding	0.998486
NONMMUT027201	non-coding	Faah	coding	0.999526
NONMMUT049701	non-coding	Faah	coding	0.999012
NONMMUT009847	non-coding	Faim2	coding	0.998414
NONMMUT038129	non-coding	Fam111a	coding	-0.998382
n274811	non-coding	Fam116b	coding	0.997266
NONMMUT021913	non-coding	Fam116b	coding	0.99731
NONMMUT024027	non-coding	Fam116b	coding	0.997696
NONMMUT074698	non-coding	Fam116b	coding	-0.999522
NONMMUT001279	non-coding	Fam120b	coding	-0.999785
NONMMUT022574	non-coding	Fam120b	coding	0.997726
NONMMUT052212	non-coding	Fam120b	coding	0.997417
NONMMUT057511	non-coding	Fam120b	coding	0.999313
NONMMUT066531	non-coding	Fam120b	coding	0.997828
ENSMUST00000149165	non-coding	Fam123c	coding	0.998457
NONMMUT001318	non-coding	Fam123c	coding	0.998811
NONMMUT021286	non-coding	Fam123c	coding	0.997902
NONMMUT042289	non-coding	Fam123c	coding	0.997079
NONMMUT045895	non-coding	Fam123c	coding	0.998124
NONMMUT054688	non-coding	Fam123c	coding	0.997917
NONMMUT055492	non-coding	Fam123c	coding	0.999032
NONMMUT032196	non-coding	Fam126b	coding	0.998473
NONMMUT042289	non-coding	Fam126b	coding	0.998125
NONMMUT065328	non-coding	Fam126b	coding	0.99903
NONMMUT027269	non-coding	Fam129b	coding	-0.999342
NONMMUT009850	non-coding	Fam135b	coding	0.999242
NONMMUT020189	non-coding	Fam135b	coding	0.997765
NONMMUT001279	non-coding	Fam13a	coding	-0.997359
NONMMUT068245	non-coding	Fam13a	coding	0.998277
NONMMUT070203	non-coding	Fam13a	coding	0.997653
n274811	non-coding	Fam163b	coding	0.997008
NONMMUT011045	non-coding	Fam163b	coding	0.997066
NONMMUT023865	non-coding	Fam163b	coding	0.997084
NONMMUT074698	non-coding	Fam163b	coding	-0.998269
NONMMUT027269	non-coding	Fam189a1	coding	0.99863
NONMMUT055912	non-coding	Fam189a1	coding	0.997848
NONMMUT001312	non-coding	Fam40b	coding	0.99835
NONMMUT005549	non-coding	Fam40b	coding	0.999271
NONMMUT027201	non-coding	Fam40b	coding	0.998476
NONMMUT049701	non-coding	Fam40b	coding	0.997444
NONMMUT021928	non-coding	Fam57b	coding	0.99886
NONMMUT067432	non-coding	Fam57b	coding	0.998598
NONMMUT035776	non-coding	Fam70a	coding	-0.997314
NONMMUT065659	non-coding	Fam70a	coding	0.998612
NONMMUT018743	non-coding	Fam73a	coding	0.999615
NONMMUT026644	non-coding	Fam73a	coding	0.999874
NONMMUT061607	non-coding	Fam73a	coding	0.997461
NONMMUT022571	non-coding	Far2	coding	0.997263
NONMMUT026613	non-coding	Far2	coding	0.998708
NONMMUT050612	non-coding	Far2	coding	0.997086
NONMMUT033184	non-coding	Fasn	coding	-0.997227
NONMMUT038129	non-coding	Fasn	coding	0.997756
ENSMUST00000137153	non-coding	Fblim1	coding	-0.998737
NONMMUT021926	non-coding	Fblim1	coding	-0.997817
NONMMUT033152	non-coding	Fblim1	coding	-0.997562
NONMMUT004432	non-coding	Fbxl21	coding	0.999702
NONMMUT067800	non-coding	Fbxl21	coding	0.998115
NONMMUT009297	non-coding	Fbxo16	coding	0.99702
NONMMUT014775	non-coding	Fbxo16	coding	0.999066
NONMMUT027201	non-coding	Fbxo16	coding	0.998699
NONMMUT006571	non-coding	Fbxo2	coding	-0.998997
NONMMUT022571	non-coding	Fbxo2	coding	0.99788
NONMMUT061423	non-coding	Fbxo2	coding	0.998497
ENSMUST00000137153	non-coding	Fbxo31	coding	0.997044
NONMMUT033152	non-coding	Fbxo31	coding	0.998101
NONMMUT021181	non-coding	Fbxo9	coding	-0.997654
NONMMUT054688	non-coding	Fbxw7	coding	0.999084
NONMMUT061609	non-coding	Fcgr2b	coding	-0.997214
NONMMUT014378	non-coding	Fcgr3	coding	-0.998162
NONMMUT072615	non-coding	Fcgr3	coding	-0.997062
NONMMUT020189	non-coding	Fgf1	coding	0.999018
n279396	non-coding	Fgf11	coding	0.998243
NONMMUT042289	non-coding	Fgf11	coding	0.997631
NONMMUT009850	non-coding	Fgf9	coding	0.998896
NONMMUT053428	non-coding	Fignl1	coding	0.997775
NONMMUT001279	non-coding	Flrt1	coding	-0.999202
NONMMUT030206	non-coding	Flrt1	coding	0.99841
NONMMUT032391	non-coding	Flrt1	coding	0.999435
NONMMUT052212	non-coding	Flrt1	coding	0.999809
NONMMUT057511	non-coding	Flrt1	coding	0.998459
NONMMUT066531	non-coding	Flrt1	coding	0.998763
NONMMUT071121	non-coding	Flrt1	coding	0.997354
NONMMUT020427	non-coding	Flt3	coding	0.997729
NONMMUT027445	non-coding	Flt3	coding	0.997246
NONMMUT055621	non-coding	Flywch1	coding	0.999827
NONMMUT023381	non-coding	Fmn2	coding	0.999484
ENSMUST00000155823	non-coding	Fndc5	coding	0.997754
n279396	non-coding	Frmd5	coding	0.997574
NONMMUT032196	non-coding	Frmd5	coding	0.998742
NONMMUT042289	non-coding	Frmd5	coding	0.997815
NONMMUT065328	non-coding	Frmd5	coding	0.998618
ENSMUST00000137153	non-coding	Frmpd3	coding	0.998961
NONMMUT021926	non-coding	Frmpd3	coding	0.999787
ENSMUST00000137153	non-coding	Frrs1	coding	-0.998072
NONMMUT021926	non-coding	Frrs1	coding	-0.997174
NONMMUT026766	non-coding	Frrs1	coding	0.998687
NONMMUT021286	non-coding	Fsd1	coding	0.99975
NONMMUT054688	non-coding	Fsd1	coding	0.997313
NONMMUT021910	non-coding	Fstl4	coding	0.997449
NONMMUT051642	non-coding	Fstl4	coding	0.998966
ENSMUST00000118146	non-coding	Fstl5	coding	-0.998409
NONMMUT007967	non-coding	Fstl5	coding	0.997347
NONMMUT042187	non-coding	Fstl5	coding	0.998919
NONMMUT061403	non-coding	Fstl5	coding	0.997968
NONMMUT073591	non-coding	Fstl5	coding	0.997503
NONMMUT067432	non-coding	Furin	coding	-0.997207
NONMMUT037649	non-coding	Fxyd5	coding	-0.999874
NONMMUT068938	non-coding	Fxyd5	coding	-0.998861
NONMMUT002429	non-coding	Fxyd7	coding	0.99793
NONMMUT007331	non-coding	Fxyd7	coding	-0.998285
NONMMUT025385	non-coding	Fxyd7	coding	0.99766
NONMMUT026999	non-coding	Fxyd7	coding	-0.999089
NONMMUT037278	non-coding	Fxyd7	coding	0.997151
NONMMUT063537	non-coding	Fxyd7	coding	0.99907
NONMMUT015202	non-coding	Gabbr1	coding	0.998061
NONMMUT009850	non-coding	Gabra1	coding	0.99979
NONMMUT035870	non-coding	Gabra1	coding	-0.997265
NONMMUT011045	non-coding	Gabra2	coding	0.998267
NONMMUT020189	non-coding	Gabra3	coding	0.998439
NONMMUT009847	non-coding	Gabra5	coding	0.998259
NONMMUT009850	non-coding	Gabra5	coding	0.997296
NONMMUT020189	non-coding	Gabra5	coding	0.999096
NONMMUT009850	non-coding	Gabrg2	coding	0.999005
NONMMUT001318	non-coding	Gad1	coding	0.99922
NONMMUT021286	non-coding	Gad1	coding	0.998364
NONMMUT054688	non-coding	Gad1	coding	0.997455
NONMMUT055492	non-coding	Gad1	coding	0.997779
n414332	non-coding	Gad2	coding	0.998371
NONMMUT006523	non-coding	Galnt13	coding	0.9989
NONMMUT016061	non-coding	Galnt13	coding	0.998212
NONMMUT023382	non-coding	Galnt13	coding	0.999121
NONMMUT032664	non-coding	Galnt13	coding	-0.999296
NONMMUT021734	non-coding	Galnt9	coding	0.997457
NONMMUT064537	non-coding	Galnt9	coding	0.998297
NONMMUT011837	non-coding	Gba2	coding	0.998804
NONMMUT023864	non-coding	Gba2	coding	0.998065
NONMMUT049810	non-coding	Gba2	coding	0.999131
NONMMUT009847	non-coding	Gdap1	coding	0.998325
NONMMUT009850	non-coding	Gdap1	coding	0.997063
NONMMUT007967	non-coding	Ggt7	coding	0.998977
ENSMUST00000137153	non-coding	Ggta1	coding	-0.999288
NONMMUT021926	non-coding	Ggta1	coding	-0.999359
NONMMUT026766	non-coding	Ggta1	coding	0.998485
ENSMUST00000118146	non-coding	Gjc2	coding	-0.997818
ENSMUST00000131086	non-coding	Gjc2	coding	0.999625
NONMMUT055621	non-coding	Glipr1	coding	-0.998749
NONMMUT009847	non-coding	Glra1	coding	0.998208
NONMMUT011045	non-coding	Glra2	coding	0.999537
NONMMUT019670	non-coding	Glra2	coding	0.997527
NONMMUT023865	non-coding	Glra2	coding	0.998928
ENSMUST00000131086	non-coding	Glra3	coding	0.998238
NONMMUT009850	non-coding	Glrb	coding	0.997432
NONMMUT037278	non-coding	Glrb	coding	0.997253
NONMMUT014102	non-coding	Gm11428	coding	-0.997305
NONMMUT032196	non-coding	Gm11428	coding	-0.997543
NONMMUT000228	non-coding	Gm5567	coding	0.999024
NONMMUT009312	non-coding	Gm996	coding	0.997399
NONMMUT048370	non-coding	Gnal	coding	0.999174
ENSMUST00000155361	non-coding	Gnao1	coding	0.999136
NONMMUT054688	non-coding	Gnaz	coding	0.998581
n414332	non-coding	Gnl3l	coding	0.99873
NONMMUT009847	non-coding	Gnl3l	coding	0.997498
ENSMUST00000155823	non-coding	Got1	coding	0.997433
NONMMUT009579	non-coding	Got1	coding	0.998898
NONMMUT042289	non-coding	Gphn	coding	0.997517
NONMMUT065328	non-coding	Gphn	coding	0.997352
NONMMUT000228	non-coding	Gpr137	coding	0.997356
NONMMUT054688	non-coding	Gpr137	coding	0.999642
NONMMUT004848	non-coding	Gpr149	coding	0.999224
NONMMUT041963	non-coding	Gpr149	coding	0.997426
NONMMUT001318	non-coding	Gpr162	coding	0.997742
NONMMUT054688	non-coding	Gpr162	coding	0.998106
NONMMUT065328	non-coding	Gpr162	coding	0.997507
NONMMUT061936	non-coding	Gpr183	coding	-0.997432
NONMMUT073256	non-coding	Gpr183	coding	0.998835
NONMMUT021734	non-coding	Gpr22	coding	0.997073
NONMMUT021928	non-coding	Gpr22	coding	0.997391
NONMMUT064537	non-coding	Gpr22	coding	0.997186
NONMMUT067432	non-coding	Gpr22	coding	0.999051
NONMMUT002429	non-coding	Gpr35	coding	-0.998598
NONMMUT007331	non-coding	Gpr35	coding	0.998659
NONMMUT026999	non-coding	Gpr35	coding	0.998847
NONMMUT037278	non-coding	Gpr35	coding	-0.998039
NONMMUT063537	non-coding	Gpr35	coding	-0.999339
ENSMUST00000149165	non-coding	Gpr37	coding	0.999762
NONMMUT001318	non-coding	Gpr37	coding	0.997032
NONMMUT020411	non-coding	Gpr37	coding	0.99918
NONMMUT026613	non-coding	Gpr37	coding	0.997276
NONMMUT042289	non-coding	Gpr37	coding	0.997293
NONMMUT045895	non-coding	Gpr37	coding	0.999824
NONMMUT050612	non-coding	Gpr37	coding	0.997718
NONMMUT055492	non-coding	Gpr37	coding	0.999788
NONMMUT049701	non-coding	Gpr45	coding	0.998873
NONMMUT009847	non-coding	Gpr75	coding	0.997783
NONMMUT009850	non-coding	Gpr75	coding	0.997114
NONMMUT020189	non-coding	Gpr75	coding	0.999249
NONMMUT042289	non-coding	Gpr83	coding	0.999371
NONMMUT065328	non-coding	Gpr83	coding	0.999614
NONMMUT020189	non-coding	Gprasp1	coding	0.999162
NONMMUT026643	non-coding	Gprc5b	coding	0.99937
NONMMUT051223	non-coding	Gprc5b	coding	0.997041
NONMMUT057895	non-coding	Gprc5b	coding	-0.999088
NONMMUT000228	non-coding	Gpx1	coding	-0.997693
NONMMUT054688	non-coding	Gpx1	coding	-0.998416
NONMMUT042289	non-coding	Gria2	coding	0.997444
NONMMUT061607	non-coding	Gria2	coding	0.997547
NONMMUT065328	non-coding	Gria2	coding	0.999122
NONMMUT011837	non-coding	Gria4	coding	0.999418
NONMMUT032196	non-coding	Gria4	coding	0.997214
ENSMUST00000131086	non-coding	Grid1	coding	0.998508
NONMMUT007967	non-coding	Grid1	coding	0.998741
NONMMUT042187	non-coding	Grid1	coding	0.997139
NONMMUT001312	non-coding	Grik1	coding	0.998086
NONMMUT002429	non-coding	Grik2	coding	0.997448
ENSMUST00000149165	non-coding	Grin2a	coding	0.997203
NONMMUT024027	non-coding	Grin2a	coding	0.997834
NONMMUT055492	non-coding	Grin2a	coding	0.997067
NONMMUT011837	non-coding	Grin2b	coding	0.997274
NONMMUT049810	non-coding	Grin2b	coding	0.997272
NONMMUT001279	non-coding	Grm3	coding	-0.998713
NONMMUT057511	non-coding	Grm3	coding	0.999528
NONMMUT066531	non-coding	Grm3	coding	0.999447
NONMMUT011045	non-coding	Grm4	coding	0.999026
NONMMUT023865	non-coding	Grm4	coding	0.998526
NONMMUT061936	non-coding	Grn	coding	-0.997954
NONMMUT032144	non-coding	Gstm7	coding	0.998058
NONMMUT025385	non-coding	Gucy1b3	coding	0.999256
NONMMUT026612	non-coding	Gucy1b3	coding	0.998968
NONMMUT043579	non-coding	Gucy1b3	coding	0.999475
NONMMUT062609	non-coding	Guk1	coding	0.998497
NONMMUT015202	non-coding	Habp4	coding	0.99777
NONMMUT011837	non-coding	Hal	coding	-0.998559
NONMMUT014102	non-coding	Hal	coding	-0.997715
NONMMUT023864	non-coding	Hal	coding	-0.999713
NONMMUT049810	non-coding	Hal	coding	-0.999422
NONMMUT009850	non-coding	Hapln4	coding	0.999289
NONMMUT035870	non-coding	Hapln4	coding	-0.997655
NONMMUT029762	non-coding	Hbb-b1	coding	-0.998828
NONMMUT061719	non-coding	Hbb-b1	coding	0.999397
NONMMUT014958	non-coding	Hdac11	coding	0.99786
NONMMUT018492	non-coding	Hdac11	coding	-0.999397
NONMMUT019913	non-coding	Hdac11	coding	-0.998527
NONMMUT009850	non-coding	Hecw1	coding	0.999623
ENSMUST00000149165	non-coding	Hecw2	coding	0.999798
NONMMUT001318	non-coding	Hecw2	coding	0.998624
NONMMUT020411	non-coding	Hecw2	coding	0.997696
NONMMUT026612	non-coding	Hecw2	coding	0.997149
NONMMUT042289	non-coding	Hecw2	coding	0.998545
NONMMUT045895	non-coding	Hecw2	coding	0.999246
NONMMUT055492	non-coding	Hecw2	coding	0.99976
NONMMUT020189	non-coding	Hepacam	coding	0.99932
ENSMUST00000149165	non-coding	Herc3	coding	0.998577
NONMMUT001318	non-coding	Herc3	coding	0.997082
NONMMUT021286	non-coding	Herc3	coding	0.997256
NONMMUT024027	non-coding	Herc3	coding	0.997656
NONMMUT045895	non-coding	Herc3	coding	0.998486
NONMMUT055492	non-coding	Herc3	coding	0.99909
NONMMUT042271	non-coding	Hist1h1d	coding	-0.9979
NONMMUT012277	non-coding	Hmgcs1	coding	-0.998746
ENSMUST00000135559	non-coding	Hoxb5	coding	0.999277
NONMMUT000399	non-coding	Hoxb5	coding	0.997849
NONMMUT016061	non-coding	Hoxb5	coding	0.997323
NONMMUT026643	non-coding	Hoxb5	coding	0.997984
ENSMUST00000149165	non-coding	Hoxb8	coding	0.998898
NONMMUT001318	non-coding	Hoxb8	coding	0.997869
NONMMUT020411	non-coding	Hoxb8	coding	0.997705
NONMMUT026612	non-coding	Hoxb8	coding	0.998671
NONMMUT042289	non-coding	Hoxb8	coding	0.997962
NONMMUT045895	non-coding	Hoxb8	coding	0.998151
NONMMUT055492	non-coding	Hoxb8	coding	0.998497
NONMMUT063537	non-coding	Hoxb8	coding	0.997441
NONMMUT005138	non-coding	Hoxb9	coding	0.997796
NONMMUT009579	non-coding	Hoxb9	coding	0.997597
NONMMUT012808	non-coding	Hoxb9	coding	0.997397
NONMMUT064537	non-coding	Hoxb9	coding	0.99882
ENSMUST00000118146	non-coding	Hpca	coding	-0.998408
NONMMUT042187	non-coding	Hpca	coding	0.997231
NONMMUT061403	non-coding	Hpca	coding	0.999156
ENSMUST00000125782	non-coding	Hpcal4	coding	0.999736
NONMMUT061403	non-coding	Hpcal4	coding	0.998498
NONMMUT001318	non-coding	Hrasls	coding	0.998228
NONMMUT002429	non-coding	Hrasls	coding	0.99785
NONMMUT007331	non-coding	Hrasls	coding	-0.998328
NONMMUT037278	non-coding	Hrasls	coding	0.999586
NONMMUT063537	non-coding	Hrasls	coding	0.99888
NONMMUT018492	non-coding	Hspa12a	coding	-0.997447
NONMMUT019913	non-coding	Hspa12a	coding	-0.997791
NONMMUT007331	non-coding	Hspa4l	coding	-0.997054
NONMMUT005432	non-coding	Hsph1	coding	-0.998114
NONMMUT055621	non-coding	Hsph1	coding	0.997144
NONMMUT009847	non-coding	Htr2c	coding	0.998679
NONMMUT056384	non-coding	Il1r1	coding	-0.997036
ENSMUST00000136119	non-coding	Il4ra	coding	-0.998137
NONMMUT004126	non-coding	Il4ra	coding	-0.997382
NONMMUT043551	non-coding	Il4ra	coding	0.997031
NONMMUT074554	non-coding	Impact	coding	0.99878
NONMMUT009847	non-coding	Ina	coding	0.998664
NONMMUT024027	non-coding	Inpp5j	coding	0.99797
NONMMUT033152	non-coding	Insig1	coding	0.997536
NONMMUT055621	non-coding	Insig1	coding	0.998745
NONMMUT061714	non-coding	Itgam	coding	-0.997036
NONMMUT027268	non-coding	Itgb1	coding	-0.997235
NONMMUT051642	non-coding	Jph1	coding	0.999307
NONMMUT001318	non-coding	Jph3	coding	0.998131
NONMMUT007331	non-coding	Jph3	coding	-0.997171
NONMMUT037278	non-coding	Jph3	coding	0.997765
NONMMUT063537	non-coding	Jph3	coding	0.997324
NONMMUT061609	non-coding	Kbtbd3	coding	0.99753
ENSMUST00000118146	non-coding	Kcna1	coding	-0.997513
NONMMUT015202	non-coding	Kcna1	coding	0.998502
NONMMUT018743	non-coding	Kcna2	coding	0.999287
NONMMUT026644	non-coding	Kcna2	coding	0.998917
NONMMUT045141	non-coding	Kcna2	coding	0.997669
NONMMUT061607	non-coding	Kcna2	coding	0.998611
ENSMUST00000125782	non-coding	Kcna4	coding	0.997928
n274811	non-coding	Kcna4	coding	0.997474
NONMMUT007967	non-coding	Kcna4	coding	0.998826
NONMMUT061403	non-coding	Kcna4	coding	0.998146
NONMMUT033152	non-coding	Kcnab2	coding	0.999413
NONMMUT000228	non-coding	Kcnab3	coding	0.997567
NONMMUT067432	non-coding	Kcnab3	coding	0.997303
NONMMUT014378	non-coding	Kcnc3	coding	0.999468
NONMMUT021926	non-coding	Kcnc3	coding	0.998094
NONMMUT072615	non-coding	Kcnc3	coding	0.998786
ENSMUST00000118146	non-coding	Kcnc4	coding	-0.997244
ENSMUST00000125782	non-coding	Kcnc4	coding	0.997903
NONMMUT042187	non-coding	Kcnc4	coding	0.997071
NONMMUT061403	non-coding	Kcnc4	coding	0.999499
NONMMUT020189	non-coding	Kcnd3	coding	0.998883
NONMMUT011837	non-coding	Kcng4	coding	0.997394
NONMMUT049810	non-coding	Kcng4	coding	0.998406
ENSMUST00000137153	non-coding	Kcnh2	coding	0.997912
NONMMUT021926	non-coding	Kcnh2	coding	0.998564
NONMMUT000228	non-coding	Kcnh5	coding	0.99834
NONMMUT001318	non-coding	Kcnh5	coding	0.997458
NONMMUT054688	non-coding	Kcnh5	coding	0.998609
NONMMUT032196	non-coding	Kcnh7	coding	0.99704
ENSMUST00000149165	non-coding	Kcnip2	coding	0.998573
NONMMUT042289	non-coding	Kcnip2	coding	0.999376
NONMMUT055492	non-coding	Kcnip2	coding	0.997801
NONMMUT065328	non-coding	Kcnip2	coding	0.998121
ENSMUST00000125782	non-coding	Kcnip3	coding	0.998651
NONMMUT061402	non-coding	Kcnip3	coding	0.997409
NONMMUT061403	non-coding	Kcnip3	coding	0.999668
NONMMUT061423	non-coding	Kcnj16	coding	0.99702
NONMMUT024407	non-coding	Kcnj3	coding	0.997413
NONMMUT007331	non-coding	Kcnj9	coding	-0.997014
NONMMUT020411	non-coding	Kcnj9	coding	0.997373
NONMMUT022571	non-coding	Kcnj9	coding	0.997089
NONMMUT026613	non-coding	Kcnj9	coding	0.997538
NONMMUT014958	non-coding	Kcnk1	coding	0.997625
NONMMUT032142	non-coding	Kcnk1	coding	0.997471
NONMMUT032957	non-coding	Kcnk1	coding	0.998874
NONMMUT032959	non-coding	Kcnk1	coding	0.999128
NONMMUT051355	non-coding	Kcnk1	coding	0.997756
NONMMUT051642	non-coding	Kcnk4	coding	0.998232
ENSMUST00000125782	non-coding	Kcnq2	coding	0.997353
n274811	non-coding	Kcnq2	coding	0.998898
NONMMUT007967	non-coding	Kcnq2	coding	0.998602
NONMMUT061403	non-coding	Kcnq2	coding	0.998286
NONMMUT001279	non-coding	Kcnq3	coding	-0.997261
ENSMUST00000125782	non-coding	Kctd9	coding	0.999392
NONMMUT061403	non-coding	Kctd9	coding	0.999129
ENSMUST00000155361	non-coding	Kif1a	coding	0.997584
NONMMUT062609	non-coding	Kif1a	coding	0.997392
NONMMUT009850	non-coding	Kif1b	coding	0.998628
NONMMUT035870	non-coding	Kif1b	coding	-0.997846
NONMMUT048370	non-coding	Kif21a	coding	0.997673
NONMMUT000228	non-coding	Kif3c	coding	0.999628
NONMMUT035870	non-coding	Kif3c	coding	-0.997475
NONMMUT001318	non-coding	Kifc2	coding	0.999838
NONMMUT037278	non-coding	Kifc2	coding	0.997888
NONMMUT042289	non-coding	Kifc2	coding	0.997556
NONMMUT063537	non-coding	Kifc2	coding	0.997181
NONMMUT065328	non-coding	Kifc2	coding	0.997191
NONMMUT027269	non-coding	Kirrel3	coding	0.997534
NONMMUT033184	non-coding	Kirrel3	coding	-0.997179
NONMMUT055912	non-coding	Kirrel3	coding	0.997474
NONMMUT000228	non-coding	Klc2	coding	0.998628
NONMMUT035870	non-coding	Klhdc8a	coding	-0.997561
NONMMUT021734	non-coding	Klhl4	coding	0.997408
NONMMUT021928	non-coding	Klhl4	coding	0.997764
NONMMUT064537	non-coding	Klhl4	coding	0.99831
NONMMUT067432	non-coding	Klhl4	coding	0.997573
NONMMUT026766	non-coding	Lamp2	coding	0.998296
NONMMUT061411	non-coding	Lamp2	coding	-0.997023
NONMMUT009579	non-coding	Lancl1	coding	0.998998
NONMMUT037278	non-coding	Lancl1	coding	0.998716
NONMMUT013797	non-coding	Lbx1	coding	-0.998542
NONMMUT032142	non-coding	Lbx1	coding	0.99983
NONMMUT032957	non-coding	Lbx1	coding	0.998478
NONMMUT045163	non-coding	Lbx1	coding	0.999468
NONMMUT051355	non-coding	Lbx1	coding	0.999656
NR_075074	non-coding	Lbx1	coding	0.998551
NONMMUT033152	non-coding	Lcp1	coding	-0.999057
ENSMUST00000131086	non-coding	Ldlr	coding	0.99738
NONMMUT007331	non-coding	Ldoc1l	coding	-0.999204
NONMMUT057237	non-coding	Ldoc1l	coding	0.99872
NONMMUT063537	non-coding	Ldoc1l	coding	0.998124
NONMMUT038518	non-coding	Lgals3	coding	-0.999504
ENSMUST00000155823	non-coding	Lgi2	coding	0.997486
NONMMUT009579	non-coding	Lgi2	coding	0.997583
NONMMUT037278	non-coding	Lgi2	coding	0.997213
NONMMUT033152	non-coding	Lgi3	coding	0.997897
ENSMUST00000150347	non-coding	Lhfpl4	coding	0.997222
NONMMUT061402	non-coding	Lhfpl4	coding	0.999221
ENSMUST00000155823	non-coding	Limk1	coding	0.997056
NONMMUT021181	non-coding	Limk1	coding	-0.99791
NONMMUT021928	non-coding	Limk1	coding	0.997445
NONMMUT005549	non-coding	Lin7b	coding	0.999514
NONMMUT027201	non-coding	Lin7b	coding	0.997653
NONMMUT011837	non-coding	Lingo4	coding	0.997186
NONMMUT032196	non-coding	Lingo4	coding	0.999487
ENSMUST00000149165	non-coding	Lmo3	coding	0.999809
NONMMUT020411	non-coding	Lmo3	coding	0.997408
NONMMUT026612	non-coding	Lmo3	coding	0.997994
NONMMUT042289	non-coding	Lmo3	coding	0.998829
NONMMUT045895	non-coding	Lmo3	coding	0.998902
NONMMUT055492	non-coding	Lmo3	coding	0.999169
NONMMUT021910	non-coding	Lnp	coding	0.997348
NONMMUT023865	non-coding	Lnp	coding	0.998416
NONMMUT023864	non-coding	Lpcat4	coding	0.998719
NONMMUT049810	non-coding	Lpcat4	coding	0.999858
NONMMUT038129	non-coding	Lphn1	coding	0.99914
NONMMUT069567	non-coding	Lphn1	coding	0.997453
NONMMUT001318	non-coding	Lphn3	coding	0.9991
NONMMUT037278	non-coding	Lphn3	coding	0.999408
NONMMUT063537	non-coding	Lphn3	coding	0.998103
NONMMUT033152	non-coding	Lpxn	coding	-0.997297
ENSMUST00000149165	non-coding	Lrfn5	coding	0.997432
NONMMUT001318	non-coding	Lrfn5	coding	0.999349
NONMMUT021286	non-coding	Lrfn5	coding	0.99756
NONMMUT042289	non-coding	Lrfn5	coding	0.997064
NONMMUT054688	non-coding	Lrfn5	coding	0.998864
NONMMUT055492	non-coding	Lrfn5	coding	0.997952
NONMMUT015202	non-coding	Lrp11	coding	0.997919
NONMMUT025385	non-coding	Lrp1b	coding	0.999287
NONMMUT026612	non-coding	Lrp1b	coding	0.999669
NONMMUT042289	non-coding	Lrp1b	coding	0.997629
NONMMUT043579	non-coding	Lrp1b	coding	0.99747
NONMMUT065328	non-coding	Lrp1b	coding	0.997339
n279396	non-coding	Lrrc4	coding	0.997034
NONMMUT009847	non-coding	Lrrc49	coding	0.997172
NONMMUT009850	non-coding	Lrrc49	coding	0.997443
NONMMUT021910	non-coding	Lrrc4b	coding	0.997099
NONMMUT051642	non-coding	Lrrc4b	coding	0.998912
NONMMUT061714	non-coding	Lrrn1	coding	0.998672
NONMMUT074526	non-coding	Lrrn1	coding	-0.99729
NONMMUT061936	non-coding	Lyn	coding	-0.998131
NONMMUT007331	non-coding	Lypd1	coding	-0.997554
NONMMUT020411	non-coding	Lypd1	coding	0.99709
ENSMUST00000125559	non-coding	Lypd6b	coding	0.997187
ENSMUST00000125782	non-coding	Mab21l1	coding	0.999515
NONMMUT074698	non-coding	Mab21l1	coding	-0.99736
NONMMUT007331	non-coding	Mab21l2	coding	-0.997836
NONMMUT011045	non-coding	Macrod2	coding	0.998842
NONMMUT061403	non-coding	Macrod2	coding	0.997316
NONMMUT012277	non-coding	Mafb	coding	0.997419
NONMMUT048391	non-coding	Mafb	coding	-0.998594
NONMMUT055621	non-coding	Mafb	coding	-0.998276
NONMMUT061936	non-coding	Mafb	coding	-0.998036
NONMMUT020411	non-coding	Magee1	coding	0.999271
NONMMUT022571	non-coding	Magee1	coding	0.999332
NONMMUT026613	non-coding	Magee1	coding	0.998899
NONMMUT045895	non-coding	Magee1	coding	0.998747
NONMMUT050612	non-coding	Magee1	coding	0.998711
NONMMUT055492	non-coding	Magee1	coding	0.997927
ENSMUST00000125782	non-coding	Magi1	coding	0.998439
ENSMUST00000135943	non-coding	Magi1	coding	0.998094
NONMMUT010478	non-coding	Magi1	coding	0.99863
NONMMUT019913	non-coding	Magi1	coding	-0.997766
NONMMUT067432	non-coding	Maneal	coding	0.997511
NONMMUT000228	non-coding	Map2k4	coding	0.997498
NONMMUT054688	non-coding	Map2k4	coding	0.998299
n279396	non-coding	Map3k12	coding	0.997039
NONMMUT074526	non-coding	Map3k8	coding	0.998466
ENSMUST00000125559	non-coding	Map3k9	coding	0.99989
NONMMUT061609	non-coding	Map3k9	coding	0.998037
NONMMUT011837	non-coding	Map4k2	coding	0.998253
NONMMUT032196	non-coding	Map4k2	coding	0.997061
NONMMUT065328	non-coding	Map4k2	coding	0.998505
NONMMUT005549	non-coding	Map6d1	coding	0.998012
NONMMUT035870	non-coding	Mapk10	coding	-0.997656
ENSMUST00000155361	non-coding	Mapk8ip1	coding	0.999511
NONMMUT048370	non-coding	Mapk8ip2	coding	0.999369
ENSMUST00000155361	non-coding	Mapk8ip3	coding	0.998392
NONMMUT000228	non-coding	Mapk9	coding	0.999619
NONMMUT035870	non-coding	Mapk9	coding	-0.998488
NONMMUT007967	non-coding	Mapre3	coding	0.997204
NONMMUT042187	non-coding	Mapre3	coding	0.997496
NONMMUT001318	non-coding	Mapt	coding	0.997584
NONMMUT002429	non-coding	Mapt	coding	0.998139
NONMMUT037278	non-coding	Mapt	coding	0.999939
NONMMUT063537	non-coding	Mapt	coding	0.997527
NONMMUT021286	non-coding	Mark1	coding	0.997809
NONMMUT024027	non-coding	Mark1	coding	0.999094
NONMMUT074698	non-coding	Mark1	coding	-0.998623
ENSMUST00000125782	non-coding	Mast1	coding	0.997091
n274811	non-coding	Mast1	coding	0.997948
NONMMUT007967	non-coding	Mast1	coding	0.9989
NONMMUT021286	non-coding	Mcf2	coding	0.998288
NONMMUT024027	non-coding	Mcf2	coding	0.998624
NONMMUT074698	non-coding	Mcf2	coding	-0.998635
ENSMUST00000155361	non-coding	Mcf2l	coding	0.997146
NONMMUT048370	non-coding	Mcf2l	coding	0.998784
NONMMUT011837	non-coding	Mcm3	coding	-0.997202
NONMMUT032196	non-coding	Mcm3	coding	-0.997441
NONMMUT065328	non-coding	Mcm3	coding	-0.998568
NONMMUT020411	non-coding	Mdga2	coding	0.997163
NONMMUT022571	non-coding	Mdga2	coding	0.997907
NONMMUT024027	non-coding	Mdga2	coding	0.998121
NONMMUT045895	non-coding	Mdga2	coding	0.997746
NONMMUT050612	non-coding	Mdga2	coding	0.997202
NONMMUT074698	non-coding	Mdga2	coding	-0.999203
NONMMUT022574	non-coding	Me3	coding	0.998113
NONMMUT051223	non-coding	Me3	coding	0.998646
NONMMUT021286	non-coding	Meg3	coding	0.998481
NONMMUT024027	non-coding	Meg3	coding	0.997952
NONMMUT074698	non-coding	Meg3	coding	-0.998835
NONMMUT011837	non-coding	Meis2	coding	0.999305
NONMMUT038129	non-coding	Meis2	coding	0.997563
NONMMUT061607	non-coding	Meis2	coding	0.997327
NONMMUT069567	non-coding	Meis2	coding	0.998672
NONMMUT012277	non-coding	Mertk	coding	0.997172
NONMMUT007967	non-coding	Mfsd6	coding	0.998267
NONMMUT035870	non-coding	Mfsd6	coding	-0.999487
NONMMUT013797	non-coding	Mgat3	coding	-0.997821
NONMMUT051223	non-coding	Mgat3	coding	0.997841
NR_075074	non-coding	Mgat3	coding	0.997125
NONMMUT005549	non-coding	Mgat5b	coding	0.998334
NONMMUT014775	non-coding	Mmp19	coding	-0.997996
NONMMUT056384	non-coding	Mmp19	coding	-0.998345
NONMMUT024027	non-coding	Mmp24	coding	0.997204
NONMMUT051642	non-coding	Mmp24	coding	0.997592
NONMMUT012277	non-coding	Mob1a	coding	0.99731
NONMMUT011045	non-coding	Mpp2	coding	0.997694
NONMMUT023865	non-coding	Mpp2	coding	0.997429
NONMMUT074698	non-coding	Mpp2	coding	-0.99788
n274811	non-coding	Mpped1	coding	0.997393
NONMMUT024027	non-coding	Mpped1	coding	0.997518
NONMMUT074698	non-coding	Mpped1	coding	-0.99895
NONMMUT032196	non-coding	Ms4a6d	coding	-0.99988
ENSMUST00000133187	non-coding	Msn	coding	0.998465
NONMMUT020707	non-coding	Msn	coding	-0.998513
ENSMUST00000133187	non-coding	Msr1	coding	0.999391
NONMMUT020707	non-coding	Msr1	coding	-0.997112
NONMMUT048370	non-coding	Mtap2	coding	0.999742
ENSMUST00000155361	non-coding	Mtap6	coding	0.997924
NONMMUT062609	non-coding	Mtap6	coding	0.998158
ENSMUST00000177011	non-coding	Mtfp1	coding	0.997321
n279396	non-coding	Mtfp1	coding	0.999171
NONMMUT005924	non-coding	Mtfp1	coding	0.997957
NONMMUT061368	non-coding	Mtfp1	coding	0.997696
NONMMUT000228	non-coding	Mtmr7	coding	0.999151
NONMMUT027268	non-coding	Mvk	coding	0.99869
NONMMUT047430	non-coding	Myd88	coding	-0.998216
NONMMUT056384	non-coding	Myd88	coding	-0.998146
NONMMUT012277	non-coding	Myo1c	coding	0.999185
NONMMUT011045	non-coding	Myrip	coding	0.999853
NONMMUT019670	non-coding	Myrip	coding	0.997149
NONMMUT023865	non-coding	Myrip	coding	0.997928
NONMMUT073591	non-coding	Myt1l	coding	0.997245
Pgm2l1	coding	n268066	non-coding	0.997865
Rundc3b	coding	n268066	non-coding	0.999119
Slc1a1	coding	n268066	non-coding	0.999555
Stac2	coding	n268066	non-coding	0.997388
Tcp11l1	coding	n268066	non-coding	0.99966
Nlgn3	coding	n279396	non-coding	0.997629
Slc7a10	coding	n279396	non-coding	0.997316
Slitrk3	coding	n279396	non-coding	0.9973
NONMMUT021286	non-coding	N28178	coding	0.997326
NONMMUT035870	non-coding	N28178	coding	-0.997664
Scn3b	coding	n344427	non-coding	0.99709
Ndrg4	coding	n414332	non-coding	0.997783
Rasgrf1	coding	n414332	non-coding	0.999658
Slc17a6	coding	n414332	non-coding	0.997773
Stmn3	coding	n414332	non-coding	0.997394
Stxbp1	coding	n414332	non-coding	0.99711
Tmem59l	coding	n414332	non-coding	0.999199
Vamp1	coding	n414332	non-coding	0.997213
NONMMUT032664	non-coding	Nalcn	coding	-0.99912
NONMMUT067800	non-coding	Nalcn	coding	0.997889
NONMMUT002429	non-coding	Nap1l3	coding	0.998071
NONMMUT009579	non-coding	Nap1l3	coding	0.998314
NONMMUT037278	non-coding	Nap1l3	coding	0.99861
NONMMUT000228	non-coding	Napg	coding	0.997892
NONMMUT009850	non-coding	Napg	coding	0.99753
NONMMUT021286	non-coding	Napg	coding	0.997976
NONMMUT035870	non-coding	Napg	coding	-0.999146
NONMMUT021181	non-coding	Nat8l	coding	-0.997023
NONMMUT048370	non-coding	Ncdn	coding	0.997929
ENSMUST00000137153	non-coding	Ncf4	coding	-0.998715
NONMMUT033152	non-coding	Ncf4	coding	-0.999511
NONMMUT014378	non-coding	Nckipsd	coding	0.99743
NONMMUT072615	non-coding	Nckipsd	coding	0.997544
NONMMUT007967	non-coding	Ncoa7	coding	0.997383
NONMMUT061402	non-coding	Ncoa7	coding	0.998053
NONMMUT061403	non-coding	Ncoa7	coding	0.999505
NONMMUT001312	non-coding	Ncrna00086	coding	0.999479
NONMMUT027201	non-coding	Ncrna00086	coding	0.999489
NONMMUT049701	non-coding	Ncrna00086	coding	0.997335
NONMMUT020189	non-coding	Ndn	coding	0.998352
NONMMUT002429	non-coding	Ndrg3	coding	0.997472
NONMMUT018743	non-coding	Ndrg3	coding	0.997156
NONMMUT026644	non-coding	Ndrg3	coding	0.998205
NONMMUT061607	non-coding	Ndrg3	coding	0.997278
NONMMUT038129	non-coding	Ndst4	coding	0.997718
NONMMUT020189	non-coding	Necab1	coding	0.999731
NONMMUT021286	non-coding	Necab3	coding	0.998308
NONMMUT054688	non-coding	Necab3	coding	0.998827
NONMMUT000228	non-coding	Necap1	coding	0.999318
NONMMUT009850	non-coding	Necap1	coding	0.997772
NONMMUT035870	non-coding	Necap1	coding	-0.998113
NONMMUT032144	non-coding	Nefm	coding	0.998771
NONMMUT048370	non-coding	Nefm	coding	0.99724
NONMMUT062609	non-coding	Nefm	coding	0.998918
NONMMUT005549	non-coding	Nek6	coding	-0.998398
NONMMUT020427	non-coding	Nek6	coding	-0.998012
NONMMUT027201	non-coding	Nek6	coding	-0.999046
NONMMUT027445	non-coding	Nek6	coding	-0.998048
NONMMUT002429	non-coding	Nell2	coding	0.99911
NONMMUT007331	non-coding	Nell2	coding	-0.998562
NONMMUT037278	non-coding	Nell2	coding	0.998482
NONMMUT063537	non-coding	Nell2	coding	0.998337
ENSMUST00000155361	non-coding	Nfya	coding	-0.997059
ENSMUST00000155361	non-coding	Nhlrc3	coding	-0.999334
NONMMUT062609	non-coding	Nhlrc3	coding	-0.998369
NONMMUT065328	non-coding	Nipa1	coding	0.997058
NONMMUT001250	non-coding	Nkd1	coding	0.997402
NONMMUT038129	non-coding	Nkd1	coding	0.998154
NONMMUT073155	non-coding	Nkd1	coding	-0.999384
NONMMUT009847	non-coding	Nkiras1	coding	0.998806
NONMMUT021286	non-coding	Nol4	coding	0.998859
NONMMUT074698	non-coding	Nol4	coding	-0.99849
Prmt8	coding	NONMMUT001250	non-coding	0.998103
Srsf12	coding	NONMMUT001250	non-coding	0.9981
P2ry6	coding	NONMMUT005432	non-coding	0.997324
Pcyt2	coding	NONMMUT005432	non-coding	-0.998722
Rab8b	coding	NONMMUT005432	non-coding	0.998524
Vav1	coding	NONMMUT005432	non-coding	0.997447
Nwd1	coding	NONMMUT005544	non-coding	0.99771
Wdr17	coding	NONMMUT005544	non-coding	0.998446
Pcdhb3	coding	NONMMUT006523	non-coding	0.999221
Sdf2l1	coding	NONMMUT006523	non-coding	-0.99803
Strbp	coding	NONMMUT007331	non-coding	-0.999433
Nudt10	coding	NONMMUT009297	non-coding	0.997314
Rnf32	coding	NONMMUT009297	non-coding	0.997254
Tgm2	coding	NONMMUT009297	non-coding	-0.99911
Vwc2l	coding	NONMMUT009297	non-coding	0.99705
Nrn1	coding	NONMMUT009847	non-coding	0.997402
Pcsk1	coding	NONMMUT009847	non-coding	0.997447
Pcsk2	coding	NONMMUT009847	non-coding	0.998799
Pnma2	coding	NONMMUT009847	non-coding	0.997322
Prepl	coding	NONMMUT009847	non-coding	0.999522
Rab3a	coding	NONMMUT009847	non-coding	0.999613
Ranbp6	coding	NONMMUT009847	non-coding	0.997094
Resp18	coding	NONMMUT009847	non-coding	0.998636
Rufy3	coding	NONMMUT009847	non-coding	0.998967
Sh3gl2	coding	NONMMUT009847	non-coding	0.998105
Sphkap	coding	NONMMUT009847	non-coding	0.997366
Spock3	coding	NONMMUT009847	non-coding	0.999287
Trim37	coding	NONMMUT009847	non-coding	0.997529
Tspyl4	coding	NONMMUT009847	non-coding	0.999797
Ypel4	coding	NONMMUT009847	non-coding	0.997505
Zfp239	coding	NONMMUT009847	non-coding	0.997461
P2ry6	coding	NONMMUT012277	non-coding	0.999681
Pcyt2	coding	NONMMUT012277	non-coding	-0.998649
Pik3ap1	coding	NONMMUT012277	non-coding	0.999116
Ppfibp1	coding	NONMMUT012277	non-coding	0.998381
Samhd1	coding	NONMMUT012277	non-coding	0.998136
Tmem151a	coding	NONMMUT012277	non-coding	-0.998277
Tnfrsf1b	coding	NONMMUT012277	non-coding	0.99742
Vav1	coding	NONMMUT012277	non-coding	0.998786
Prkaa2	coding	NONMMUT015202	non-coding	0.999111
Tmem151b	coding	NONMMUT015202	non-coding	0.997504
Tpd52l1	coding	NONMMUT015202	non-coding	0.999731
Unc13c	coding	NONMMUT015202	non-coding	0.997559
Pcdhb3	coding	NONMMUT016061	non-coding	0.99921
Robo2	coding	NONMMUT016061	non-coding	0.998009
Phospho1	coding	NONMMUT019670	non-coding	0.997187
Psd	coding	NONMMUT019670	non-coding	0.997707
Rps6ka2	coding	NONMMUT019670	non-coding	0.997252
Npl	coding	NONMMUT021734	non-coding	-0.998952
Tmeff2	coding	NONMMUT021734	non-coding	0.998555
Unc13a	coding	NONMMUT021734	non-coding	0.998223
Pcdh17	coding	NONMMUT021913	non-coding	0.997338
Pcnxl2	coding	NONMMUT021913	non-coding	0.998236
Rps6ka2	coding	NONMMUT021913	non-coding	0.998716
Rusc1	coding	NONMMUT021913	non-coding	0.99838
Sccpdh	coding	NONMMUT021913	non-coding	0.997146
Tesc	coding	NONMMUT021913	non-coding	0.997206
Tmcc2	coding	NONMMUT021913	non-coding	0.99874
Pde10a	coding	NONMMUT023865	non-coding	0.997555
Phospho1	coding	NONMMUT023865	non-coding	0.998069
Tmem145	coding	NONMMUT023865	non-coding	0.998366
Ppp1r9a	coding	NONMMUT024407	non-coding	0.997182
Srgap3	coding	NONMMUT024407	non-coding	0.997435
Zdhhc17	coding	NONMMUT024407	non-coding	0.997751
Ppp1r9a	coding	NONMMUT025385	non-coding	0.99946
Sprn	coding	NONMMUT025385	non-coding	0.99733
Srgap3	coding	NONMMUT025385	non-coding	0.999238
Wdr54	coding	NONMMUT025385	non-coding	0.997138
Srgap3	coding	NONMMUT026612	non-coding	0.997518
Gabrb2	coding	NONMMUT026613	non-coding	0.997316
Parm1	coding	NONMMUT026613	non-coding	0.998803
Ptprt	coding	NONMMUT026613	non-coding	0.997066
Rprd1a	coding	NONMMUT026613	non-coding	0.99711
Olfr1161	coding	NONMMUT026643	non-coding	-0.999844
Tceal1	coding	NONMMUT026643	non-coding	0.998508
Plau	coding	NONMMUT026766	non-coding	0.998879
Ripk1	coding	NONMMUT026766	non-coding	0.999173
Sh3bp2	coding	NONMMUT026766	non-coding	0.998021
Tmem106a	coding	NONMMUT026766	non-coding	0.997602
Tubb3	coding	NONMMUT026766	non-coding	-0.999658
Nrip2	coding	NONMMUT026999	non-coding	-0.99894
Ppp1r9a	coding	NONMMUT026999	non-coding	-0.998169
Slitrk1	coding	NONMMUT026999	non-coding	-0.997172
Srgap3	coding	NONMMUT026999	non-coding	-0.99867
Syne1	coding	NONMMUT026999	non-coding	-0.9972
Tecr	coding	NONMMUT026999	non-coding	-0.998382
Wdr47	coding	NONMMUT026999	non-coding	-0.997983
Zdhhc17	coding	NONMMUT026999	non-coding	-0.999665
Plek	coding	NONMMUT027269	non-coding	-0.998287
Rap1gap	coding	NONMMUT027269	non-coding	0.997263
Ttll1	coding	NONMMUT027269	non-coding	0.998933
Zfp52	coding	NONMMUT027269	non-coding	-0.997979
Plaur	coding	NONMMUT030206	non-coding	-0.997914
Sec14l2	coding	NONMMUT030206	non-coding	0.997519
Ppip5k1	coding	NONMMUT032196	non-coding	0.997962
Rap1gap	coding	NONMMUT032196	non-coding	0.997898
Sacs	coding	NONMMUT032196	non-coding	0.998714
Slc19a2	coding	NONMMUT032196	non-coding	0.999114
Slc9a7	coding	NONMMUT032196	non-coding	0.998174
Slitrk3	coding	NONMMUT032196	non-coding	0.998936
Tmem35	coding	NONMMUT032196	non-coding	0.997799
Trhr	coding	NONMMUT032196	non-coding	0.998054
Trpc7	coding	NONMMUT032196	non-coding	0.998018
Zer1	coding	NONMMUT032196	non-coding	0.999677
Nsg2	coding	NONMMUT032959	non-coding	0.999821
Pcdhb15	coding	NONMMUT032959	non-coding	0.998272
Rgnef	coding	NONMMUT032959	non-coding	0.997734
Ppm1k	coding	NONMMUT037072	non-coding	0.998132
Rgnef	coding	NONMMUT037072	non-coding	0.997601
Odz1	coding	NONMMUT037278	non-coding	0.998616
Phactr1	coding	NONMMUT037278	non-coding	0.997254
Plcb4	coding	NONMMUT037278	non-coding	0.999121
Plin2	coding	NONMMUT037278	non-coding	-0.999415
Ppp1r13b	coding	NONMMUT037278	non-coding	0.998733
Rimkla	coding	NONMMUT037278	non-coding	0.997746
Rogdi	coding	NONMMUT037278	non-coding	0.997546
Sdr39u1	coding	NONMMUT037278	non-coding	0.999272
Slitrk1	coding	NONMMUT037278	non-coding	0.999287
Smarcd3	coding	NONMMUT037278	non-coding	0.998469
Susd4	coding	NONMMUT037278	non-coding	0.998009
Tecr	coding	NONMMUT037278	non-coding	0.99843
Trpc5	coding	NONMMUT037278	non-coding	0.999243
Ttc3	coding	NONMMUT037278	non-coding	0.999667
Wdr47	coding	NONMMUT037278	non-coding	0.998699
Zcchc18	coding	NONMMUT037278	non-coding	0.99836
Mapk10	coding	NONMMUT042187	non-coding	0.997844
Pfkm	coding	NONMMUT042187	non-coding	0.998281
Ryr2	coding	NONMMUT042187	non-coding	0.998395
Sgip1	coding	NONMMUT042187	non-coding	0.998866
Spock2	coding	NONMMUT042187	non-coding	0.997017
Syn3	coding	NONMMUT042187	non-coding	0.997917
Syngr3	coding	NONMMUT042187	non-coding	0.998308
Tmem150c	coding	NONMMUT042187	non-coding	0.997189
Vamp2	coding	NONMMUT042187	non-coding	0.99869
Pcdhb15	coding	NONMMUT045163	non-coding	0.997457
Ppargc1a	coding	NONMMUT045163	non-coding	0.998777
Syne1	coding	NONMMUT045163	non-coding	0.99761
Tom1l2	coding	NONMMUT045163	non-coding	0.997251
Zcchc12	coding	NONMMUT045163	non-coding	0.998806
Cit	coding	NONMMUT045895	non-coding	0.998354
P2rx6	coding	NONMMUT045895	non-coding	0.997142
Parm1	coding	NONMMUT045895	non-coding	0.997383
Plch1	coding	NONMMUT045895	non-coding	0.997455
Plekha6	coding	NONMMUT045895	non-coding	0.998887
Ptprt	coding	NONMMUT045895	non-coding	0.998711
Rprd1a	coding	NONMMUT045895	non-coding	0.999819
Slc35f3	coding	NONMMUT045895	non-coding	0.997114
Slc4a3	coding	NONMMUT045895	non-coding	0.998121
Tnk2	coding	NONMMUT045895	non-coding	0.997557
Snx32	coding	NONMMUT047865	non-coding	0.998353
Zfp454	coding	NONMMUT047865	non-coding	0.997786
St8sia1	coding	NONMMUT048013	non-coding	0.997062
Nudt10	coding	NONMMUT049701	non-coding	0.9971
Rnf32	coding	NONMMUT049701	non-coding	0.99709
Vwc2l	coding	NONMMUT049701	non-coding	0.998453
Nsg2	coding	NONMMUT051355	non-coding	0.997627
Pcdhb15	coding	NONMMUT051355	non-coding	0.998946
Ppargc1a	coding	NONMMUT051355	non-coding	0.997106
Syne1	coding	NONMMUT051355	non-coding	0.997899
Zcchc12	coding	NONMMUT051355	non-coding	0.9985
St8sia1	coding	NONMMUT051642	non-coding	0.997824
Pcyt2	coding	NONMMUT055621	non-coding	0.997338
Pik3ap1	coding	NONMMUT055621	non-coding	-0.997561
Tppp	coding	NONMMUT055621	non-coding	0.998024
Vav1	coding	NONMMUT055621	non-coding	-0.997788
Strbp	coding	NONMMUT057237	non-coding	0.998546
Nrgn	coding	NONMMUT061402	non-coding	0.998585
Ppp4r4	coding	NONMMUT061402	non-coding	0.997504
Psd	coding	NONMMUT061402	non-coding	0.997563
Spire2	coding	NONMMUT061402	non-coding	0.998198
Stmn4	coding	NONMMUT061402	non-coding	0.99729
Wasf3	coding	NONMMUT061402	non-coding	0.997666
Nrgn	coding	NONMMUT061403	non-coding	0.99797
Oprd1	coding	NONMMUT061403	non-coding	0.998781
Peli3	coding	NONMMUT061403	non-coding	0.997641
Ppfia2	coding	NONMMUT061403	non-coding	0.998
Psd	coding	NONMMUT061403	non-coding	0.997902
Snca	coding	NONMMUT061403	non-coding	0.99927
Snhg11	coding	NONMMUT061403	non-coding	0.997828
Spire2	coding	NONMMUT061403	non-coding	0.997771
Tuba8	coding	NONMMUT061403	non-coding	0.997189
Wasf3	coding	NONMMUT061403	non-coding	0.998873
Nwd1	coding	NONMMUT061423	non-coding	0.999299
Tmem229a	coding	NONMMUT061423	non-coding	0.997299
Nrgn	coding	NONMMUT061426	non-coding	0.997752
Palm2	coding	NONMMUT061434	non-coding	0.997554
Prph	coding	NONMMUT061434	non-coding	0.998133
Pcyt2	coding	NONMMUT061936	non-coding	0.997133
Pik3ap1	coding	NONMMUT061936	non-coding	-0.997638
Ppfibp1	coding	NONMMUT061936	non-coding	-0.997299
S100a4	coding	NONMMUT061936	non-coding	-0.999588
Slc2a3	coding	NONMMUT061936	non-coding	0.998803
Tyrobp	coding	NONMMUT061936	non-coding	-0.99974
Vav1	coding	NONMMUT061936	non-coding	-0.998267
Nptx1	coding	NONMMUT062609	non-coding	0.997331
Pcyt1b	coding	NONMMUT062609	non-coding	0.998371
Plac8	coding	NONMMUT062609	non-coding	-0.999469
Rab39b	coding	NONMMUT062609	non-coding	0.997595
Reep2	coding	NONMMUT062609	non-coding	0.997436
S1pr5	coding	NONMMUT062609	non-coding	0.999378
Sh3bgrl	coding	NONMMUT062609	non-coding	-0.997105
Surf4	coding	NONMMUT062609	non-coding	-0.997328
Sv2a	coding	NONMMUT062609	non-coding	0.998649
Tmed3	coding	NONMMUT062609	non-coding	-0.99713
Srgap3	coding	NONMMUT063537	non-coding	0.997675
Strbp	coding	NONMMUT063537	non-coding	0.998457
Sacs	coding	NONMMUT065328	non-coding	0.997641
Zfp248	coding	NONMMUT069567	non-coding	0.997052
Pcyt2	coding	NONMMUT073256	non-coding	-0.998494
Ppfibp1	coding	NONMMUT073256	non-coding	0.998949
Ptbp1	coding	NONMMUT073256	non-coding	0.997897
S100a4	coding	NONMMUT073256	non-coding	0.99855
Tyrobp	coding	NONMMUT073256	non-coding	0.997874
Vav1	coding	NONMMUT073256	non-coding	0.998052
Pfkm	coding	NONMMUT073591	non-coding	0.999292
Ryr2	coding	NONMMUT073591	non-coding	0.997067
Sgip1	coding	NONMMUT073591	non-coding	0.998606
Syn3	coding	NONMMUT073591	non-coding	0.997123
Syngr3	coding	NONMMUT073591	non-coding	0.997279
Tpd52l1	coding	NONMMUT073591	non-coding	0.997859
Unc80	coding	NONMMUT073591	non-coding	0.997082
Vamp2	coding	NONMMUT073591	non-coding	0.99945
NONMMUT013797	non-coding	Nos1	coding	-0.999133
NR_075074	non-coding	Nos1	coding	0.999082
NONMMUT004524	non-coding	Npl	coding	-0.998592
NONMMUT021928	non-coding	Npl	coding	-0.997628
NONMMUT067432	non-coding	Npl	coding	-0.998846
ENSMUST00000155361	non-coding	Nptx1	coding	0.998529
Ppm1k	coding	NR_075074	non-coding	0.997964
NONMMUT002429	non-coding	Nrip2	coding	0.997357
NONMMUT057237	non-coding	Nrip2	coding	0.997673
NONMMUT009850	non-coding	Nrsn2	coding	0.99761
NONMMUT021286	non-coding	Nrxn2	coding	0.99951
NONMMUT035870	non-coding	Nrxn2	coding	-0.997218
NONMMUT014958	non-coding	Nsg2	coding	0.999416
NONMMUT032957	non-coding	Nsg2	coding	0.997464
NONMMUT068903	non-coding	Ntsr2	coding	-0.997575
NONMMUT001312	non-coding	Nudt10	coding	0.997585
NONMMUT005549	non-coding	Nudt10	coding	0.997009
NONMMUT014775	non-coding	Nudt10	coding	0.998195
NONMMUT027201	non-coding	Nudt10	coding	0.999847
NONMMUT006571	non-coding	Nwd1	coding	-0.998198
NONMMUT001318	non-coding	Odz1	coding	0.997558
NONMMUT009579	non-coding	Odz1	coding	0.997433
NONMMUT005549	non-coding	Odz4	coding	0.997057
NONMMUT001318	non-coding	Ogfod1	coding	0.999057
NONMMUT021286	non-coding	Ogfod1	coding	0.998508
NONMMUT054688	non-coding	Ogfod1	coding	0.998295
NONMMUT011837	non-coding	Olfm3	coding	0.998052
NONMMUT023864	non-coding	Olfm3	coding	0.998709
NONMMUT049810	non-coding	Olfm3	coding	0.997164
ENSMUST00000135559	non-coding	Olfr1161	coding	-0.998371
NONMMUT057895	non-coding	Olfr1161	coding	0.999067
NONMMUT074554	non-coding	Olfr1411	coding	0.997683
NONMMUT020707	non-coding	Olfr519	coding	0.997161
ENSMUST00000125782	non-coding	Oprd1	coding	0.998439
NONMMUT011045	non-coding	Oprd1	coding	0.997993
NONMMUT009579	non-coding	Oprl1	coding	0.998648
NONMMUT064537	non-coding	Oprl1	coding	0.997248
ENSMUST00000155823	non-coding	Osbpl6	coding	0.997937
NONMMUT009104	non-coding	Ostf1	coding	-0.997259
NONMMUT051642	non-coding	Otub2	coding	0.999214
NONMMUT042289	non-coding	P2rx5	coding	0.998307
NONMMUT065328	non-coding	P2rx5	coding	0.998045
NONMMUT001318	non-coding	P2rx6	coding	0.99781
NONMMUT007331	non-coding	P2rx6	coding	-0.998758
NONMMUT020411	non-coding	P2rx6	coding	0.997272
NONMMUT055492	non-coding	P2rx6	coding	0.997408
NONMMUT063537	non-coding	P2rx6	coding	0.998961
NONMMUT054688	non-coding	P4hb	coding	-0.999229
ENSMUST00000155823	non-coding	Pak1	coding	0.998615
NONMMUT048391	non-coding	Palm2	coding	0.998375
ENSMUST00000118146	non-coding	Panx2	coding	-0.997955
ENSMUST00000131086	non-coding	Panx2	coding	0.998546
NONMMUT020411	non-coding	Parm1	coding	0.998966
NONMMUT050612	non-coding	Parm1	coding	0.998615
NONMMUT061714	non-coding	Parp12	coding	-0.997153
NONMMUT074526	non-coding	Parp12	coding	0.998201
NONMMUT054688	non-coding	Parp6	coding	0.998889
NONMMUT014378	non-coding	Parp9	coding	-0.998608
NONMMUT072615	non-coding	Parp9	coding	-0.998515
n274811	non-coding	Pcdh17	coding	0.997641
NONMMUT007967	non-coding	Pcdh17	coding	0.998111
NONMMUT021926	non-coding	Pcdh17	coding	0.997083
NONMMUT014958	non-coding	Pcdhb15	coding	0.9981
NONMMUT032142	non-coding	Pcdhb15	coding	0.997959
NONMMUT023382	non-coding	Pcdhb3	coding	0.998442
NONMMUT032664	non-coding	Pcdhb3	coding	-0.99807
NONMMUT009850	non-coding	Pcdhb8	coding	0.997948
NONMMUT035870	non-coding	Pcdhb8	coding	-0.998779
NONMMUT021286	non-coding	Pclo	coding	0.998535
NONMMUT035870	non-coding	Pclo	coding	-0.998154
NONMMUT000228	non-coding	Pcnxl2	coding	0.99702
NONMMUT021286	non-coding	Pcnxl2	coding	0.998808
NONMMUT035870	non-coding	Pcnxl2	coding	-0.998469
ENSMUST00000155361	non-coding	Pcp4l1	coding	0.997567
NONMMUT009850	non-coding	Pcsk1	coding	0.998142
NONMMUT020189	non-coding	Pcsk1	coding	0.997632
NONMMUT048370	non-coding	Pcsk1n	coding	0.997854
NONMMUT024027	non-coding	Pcx	coding	0.999986
NONMMUT074698	non-coding	Pcx	coding	-0.99734
NONMMUT021910	non-coding	Pde10a	coding	0.998522
NONMMUT021286	non-coding	Pde4a	coding	0.998701
NONMMUT054688	non-coding	Pde4a	coding	0.999554
NONMMUT072615	non-coding	Pde8b	coding	0.997873
ENSMUST00000155823	non-coding	Peg3	coding	0.997326
n274811	non-coding	Peli3	coding	0.997862
NONMMUT007967	non-coding	Peli3	coding	0.999672
NONMMUT004848	non-coding	Pfkm	coding	0.997203
NONMMUT009850	non-coding	Pfn2	coding	0.998551
NONMMUT035870	non-coding	Pfn2	coding	-0.998751
NONMMUT021181	non-coding	Pgd	coding	0.999336
NONMMUT033152	non-coding	Pgd	coding	-0.998216
NONMMUT049810	non-coding	Pgm2l1	coding	0.997036
n274811	non-coding	Pgr	coding	0.997337
NONMMUT024027	non-coding	Pgr	coding	0.997659
NONMMUT074698	non-coding	Pgr	coding	-0.999415
NONMMUT009850	non-coding	Phactr1	coding	0.998192
NONMMUT024027	non-coding	Phactr3	coding	0.997126
NONMMUT011045	non-coding	Phospho1	coding	0.999867
NONMMUT009850	non-coding	Phyhip	coding	0.999324
ENSMUST00000125559	non-coding	Pilra	coding	-0.997855
NONMMUT061714	non-coding	Pilra	coding	-0.997011
NONMMUT009579	non-coding	Pip5k1b	coding	0.997438
NONMMUT009850	non-coding	Pja2	coding	0.997246
ENSMUST00000155361	non-coding	Plac8	coding	-0.997529
NONMMUT061411	non-coding	Plau	coding	-0.99734
NONMMUT024677	non-coding	Plaur	coding	-0.997393
NONMMUT032391	non-coding	Plaur	coding	-0.997876
NONMMUT052212	non-coding	Plaur	coding	-0.997169
NONMMUT002429	non-coding	Plcb4	coding	0.998472
NONMMUT007331	non-coding	Plcb4	coding	-0.998466
NONMMUT063537	non-coding	Plcb4	coding	0.998409
ENSMUST00000149165	non-coding	Plch1	coding	0.997507
NONMMUT024027	non-coding	Plch1	coding	0.998873
NONMMUT055492	non-coding	Plch1	coding	0.997971
ENSMUST00000149165	non-coding	Plekha6	coding	0.999821
NONMMUT001318	non-coding	Plekha6	coding	0.998293
NONMMUT026612	non-coding	Plekha6	coding	0.997506
NONMMUT042289	non-coding	Plekha6	coding	0.999146
NONMMUT055492	non-coding	Plekha6	coding	0.999515
NONMMUT065328	non-coding	Plekha6	coding	0.997112
NONMMUT021181	non-coding	Plekho1	coding	0.999191
NONMMUT021928	non-coding	Plekho1	coding	-0.998482
NONMMUT001318	non-coding	Plin2	coding	-0.998223
NONMMUT009579	non-coding	Plin2	coding	-0.997137
NONMMUT074554	non-coding	Plxna4	coding	0.997722
NONMMUT001318	non-coding	Pnck	coding	0.999078
NONMMUT007331	non-coding	Pnck	coding	-0.998396
NONMMUT055492	non-coding	Pnck	coding	0.997294
NONMMUT063537	non-coding	Pnck	coding	0.998795
NONMMUT020189	non-coding	Pnma2	coding	0.999198
NONMMUT053428	non-coding	Podxl2	coding	-0.99872
NONMMUT074554	non-coding	Podxl2	coding	0.997774
NONMMUT032142	non-coding	Ppargc1a	coding	0.997932
ENSMUST00000125782	non-coding	Ppfia2	coding	0.997884
NONMMUT007967	non-coding	Ppfia2	coding	0.998063
NONMMUT038129	non-coding	Ppip5k1	coding	0.998752
NONMMUT073155	non-coding	Ppip5k1	coding	-0.997833
NONMMUT011837	non-coding	Ppm1e	coding	0.998836
NONMMUT061607	non-coding	Ppm1e	coding	0.999436
NONMMUT017064	non-coding	Ppm1k	coding	-0.997662
NONMMUT032957	non-coding	Ppm1k	coding	0.99854
NONMMUT009579	non-coding	Ppp1r13b	coding	0.998213
NONMMUT026612	non-coding	Ppp1r9a	coding	0.997962
[truncated: 439 more rows]

## Sheet: The property
genesymbol/lncRNA	Description	Source	degree	k-core	type	modelnumber
1110051M20Rik	RIKEN cDNA 1110051M20 gene // RIKEN cDNA 1110051M20 gene		3	3	coding	6
2410022L05Rik	RIKEN cDNA 2410022L05 gene // RIKEN cDNA 2410022L05 gene // RIKEN cDNA 2410022L05 gene // RIKEN cDNA 2410022L05 gene		3	3	coding	12
2610002M06Rik	RIKEN cDNA 2610002M06 gene // charged multivesicular body protein 1B // RIKEN cDNA 2610002M06 gene // RIKEN cDNA 2610002M06 gene // charged multivesicular body protein 1B // RIKEN cDNA 2610002M06 gene // RIKEN cDNA 2610002M06 gene // RIKEN cDNA 2610002M06 gene		1	1	coding	6
2610017I09Rik	RIKEN cDNA 2610017I09 gene // RIKEN cDNA 2610017I09 gene		3	2	coding	12
2610039C10Rik	RIKEN cDNA 2610039C10 gene // RIKEN cDNA 2610039C10 gene // RIKEN cDNA 2610039C10 gene // RIKEN cDNA 2610039C10 gene // RIKEN cDNA 2610039C10 gene // RIKEN cDNA 2610039C10 gene // RIKEN cDNA 2610039C10 gene		1	1	coding	51
4833424O15Rik	RIKEN cDNA 4833424O15 gene // RIKEN cDNA 4833424O15 gene // RIKEN cDNA 4833424O15 gene		2	1	coding	6
4930572J05Rik	RIKEN cDNA 4930572J05 gene // RIKEN cDNA 4930572J05 gene // RIKEN cDNA 4930572J05 gene // RIKEN cDNA 4930572J05 gene // RIKEN cDNA 4930572J05 gene // RIKEN cDNA 4930572J05 gene		1	1	coding	30
4933431E20Rik	RIKEN cDNA 4933431E20 gene // RIKEN cDNA 4933431E20 gene		6	3	coding	12
5033414D02Rik	RIKEN cDNA 5033414D02 gene // RIKEN cDNA 5033414D02 gene // RIKEN cDNA 5033414D02 gene // RIKEN cDNA 5033414D02 gene // RIKEN cDNA 5033414D02 gene // RIKEN cDNA 5033414D02 gene // RIKEN cDNA 5033414D02 gene // RIKEN cDNA 5033414D02 gene // RIKEN cDNA 5033414D02 gene // RIKEN cDNA 5033414D02 gene		1	1	coding	51
5730403B10Rik	RIKEN cDNA 5730403B10 gene // RIKEN cDNA 5730403B10 gene // RIKEN cDNA 5730403B10 gene // RIKEN cDNA 5730403B10 gene // RIKEN cDNA 5730403B10 gene // RIKEN cDNA 5730403B10 gene		3	3	coding	6
6030419C18Rik	RIKEN cDNA 6030419C18 gene // RIKEN cDNA 6030419C18 gene // RIKEN cDNA 6030419C18 gene // RIKEN cDNA 6030419C18 gene		1	1	coding	12
6330439K17Rik	RIKEN cDNA 6330439K17 gene // RIKEN cDNA 6330439K17 gene // RIKEN cDNA 6330439K17 gene // RIKEN cDNA 6330439K17 gene // RIKEN cDNA 6330439K17 gene // RIKEN cDNA 6330439K17 gene // RIKEN cDNA 6330439K17 gene // RIKEN cDNA 6330439K17 gene // RIKEN cDNA 6330439K17 gene // RIKEN cDNA 6330439K17 gene // RIKEN cDNA 6330439K17 gene		1	1	coding	3
6330503K22Rik	RIKEN cDNA 6330503K22 gene // RIKEN cDNA 6330503K22 gene // RIKEN cDNA 6330503K22 gene // RIKEN cDNA 6330503K22 gene // RIKEN cDNA 6330503K22 gene // RIKEN cDNA 6330503K22 gene // RIKEN cDNA 6330503K22 gene // RIKEN cDNA 6330503K22 gene // RIKEN cDNA 6330503K22 gene // RIKEN cDNA 6330503K22 gene // RIKEN cDNA 6330503K22 gene // RIKEN cDNA 6330503K22 gene		2	2	coding	6
6430548M08Rik	RIKEN cDNA 6430548M08 gene // RIKEN cDNA 6430548M08 gene // RIKEN cDNA 6430548M08 gene // RIKEN cDNA 6430548M08 gene // RIKEN cDNA 6430548M08 gene // RIKEN cDNA 6430548M08 gene // RIKEN cDNA 6430548M08 gene // RIKEN cDNA 6430548M08 gene // RIKEN cDNA 6430548M08 gene // RIKEN cDNA 6430548M08 gene // RIKEN cDNA 6430548M08 gene // RIKEN cDNA 6430548M08 gene // RIKEN cDNA 6430548M08 gene // RIKEN cDN…		1	1	coding	30
8430419L09Rik	RIKEN cDNA 8430419L09 gene // RIKEN cDNA 8430419L09 gene // RIKEN cDNA 8430419L09 gene // RIKEN cDNA 8430419L09 gene // RIKEN cDNA 8430419L09 gene // RIKEN cDNA 8430419L09 gene // RIKEN cDNA 8430419L09 gene // RIKEN cDNA 8430419L09 gene // RIKEN cDNA 8430419L09 gene // RIKEN cDNA 8430419L09 gene		2	2	coding	3
9330155M09Rik	RIKEN cDNA 9330155M09 gene // RIKEN cDNA 9330155M09 gene		1	1	coding	12
9430031J16Rik	RIKEN cDNA 9430031J16 gene // RIKEN cDNA 9430031J16 gene // RIKEN cDNA 9430031J16 gene // RIKEN cDNA 9430031J16 gene // RIKEN cDNA 9430031J16 gene		1	1	coding	12
A030009H04Rik	RIKEN cDNA A030009H04 gene // RIKEN cDNA A030009H04 gene		2	1	coding	12
A730017C20Rik	RIKEN cDNA A730017C20 gene // RIKEN cDNA A730017C20 gene // RIKEN cDNA A730017C20 gene // RIKEN cDNA A730017C20 gene // RIKEN cDNA A730017C20 gene // RIKEN cDNA A730017C20 gene // RIKEN cDNA A730017C20 gene // RIKEN cDNA A730017C20 gene // RIKEN cDNA A730017C20 gene // RIKEN cDNA A730017C20 gene // RIKEN cDNA A730017C20 gene // RIKEN cDNA A730017C20 gene // RIKEN cDNA A730017C20 gene // RIKEN cDN…		2	2	coding	6
A830018L16Rik	RIKEN cDNA A830018L16 gene // RIKEN cDNA A830018L16 gene // RIKEN cDNA A830018L16 gene // RIKEN cDNA A830018L16 gene // RIKEN cDNA A830018L16 gene // RIKEN cDNA A830018L16 gene // RIKEN cDNA A830018L16 gene // RIKEN cDNA A830018L16 gene // RIKEN cDNA A830018L16 gene // RIKEN cDNA A830018L16 gene // RIKEN cDNA A830018L16 gene		4	4	coding	12
A930017M01Rik	Smg-5 homolog, nonsense mediated mRNA decay factor pseudogene		2	2	coding	12
Aacs	acetoacetyl-CoA synthetase // acetoacetyl-CoA synthetase // acetoacetyl-CoA synthetase // acetoacetyl-CoA synthetase // acetoacetyl-CoA synthetase // acetoacetyl-CoA synthetase // acetoacetyl-CoA synthetase		3	2	coding	3
Aatk	apoptosis-associated tyrosine kinase // apoptosis-associated tyrosine kinase // apoptosis-associated tyrosine kinase // apoptosis-associated tyrosine kinase // apoptosis-associated tyrosine kinase // apoptosis-associated tyrosine kinase // apoptosis-associated tyrosine kinase // apoptosis-associated tyrosine kinase // apoptosis-associated tyrosine kinase // apoptosis-associated tyrosine kinase //…		2	2	coding	12
AB124611	cDNA sequence AB124611 // cDNA sequence AB124611 // cDNA sequence AB124611 // cDNA sequence AB124611 // cDNA sequence AB124611 // cDNA sequence AB124611 // cDNA sequence AB124611 // cDNA sequence AB124611 // cDNA sequence AB124611 // cDNA sequence AB124611 // cDNA sequence AB124611 // cDNA sequence AB124611		2	2	coding	78
Abat	4-aminobutyrate aminotransferase // 4-aminobutyrate aminotransferase // 4-aminobutyrate aminotransferase // 4-aminobutyrate aminotransferase // 4-aminobutyrate aminotransferase // 4-aminobutyrate aminotransferase // 4-aminobutyrate aminotransferase // 4-aminobutyrate aminotransferase // 4-aminobutyrate aminotransferase // 4-aminobutyrate aminotransferase		2	2	coding	6
Abca2	ATP-binding cassette, sub-family A (ABC1), member 2 // ATP-binding cassette, sub-family A (ABC1), member 2 // ATP-binding cassette, sub-family A (ABC1), member 2 // ATP-binding cassette, sub-family A (ABC1), member 2 // ATP-binding cassette, sub-family A (ABC1), member 2 // ATP-binding cassette, sub-family A (ABC1), member 2 // ATP-binding cassette, sub-family A (ABC1), member 2 // ATP-binding ca…		3	3	coding	6
Abcb9	ATP-binding cassette, sub-family B (MDR/TAP), member 9 // ATP-binding cassette, sub-family B (MDR/TAP), member 9 // ATP-binding cassette, sub-family B (MDR/TAP), member 9 // ATP-binding cassette, sub-family B (MDR/TAP), member 9 // ATP-binding cassette, sub-family B (MDR/TAP), member 9 // ATP-binding cassette, sub-family B (MDR/TAP), member 9 // ATP-binding cassette, sub-family B (MDR/TAP), membe…		6	6	coding	12
Abcg4	ATP-binding cassette, sub-family G (WHITE), member 4 // ATP-binding cassette, sub-family G (WHITE), member 4 // ATP-binding cassette, sub-family G (WHITE), member 4 // ATP-binding cassette, sub-family G (WHITE), member 4 // ATP-binding cassette, sub-family G (WHITE), member 4 // ATP-binding cassette, sub-family G (WHITE), member 4 // ATP-binding cassette, sub-family G (WHITE), member 4 // ATP-bin…		4	4	coding	6
Abhd3	abhydrolase domain containing 3 // abhydrolase domain containing 3 // abhydrolase domain containing 3 // abhydrolase domain containing 3 // abhydrolase domain containing 3 // abhydrolase domain containing 3 // abhydrolase domain containing 3 // abhydrolase domain containing 3 // abhydrolase domain containing 3 // abhydrolase domain containing 3		1	1	coding	6
Abhd8	abhydrolase domain containing 8 // abhydrolase domain containing 8 // abhydrolase domain containing 8 // abhydrolase domain containing 8 // abhydrolase domain containing 8 // abhydrolase domain containing 8		3	3	coding	6
Ablim2	actin-binding LIM protein 2 // actin-binding LIM protein 2 // actin-binding LIM protein 2 // actin-binding LIM protein 2 // actin-binding LIM protein 2 // actin-binding LIM protein 2 // actin-binding LIM protein 2 // actin-binding LIM protein 2 // actin-binding LIM protein 2 // actin-binding LIM protein 2 // actin-binding LIM protein 2 // actin-binding LIM protein 2 // actin-binding LIM protein 2…		2	2	coding	6
Accn2	amiloride-sensitive cation channel 2, neuronal // amiloride-sensitive cation channel 2, neuronal // amiloride-sensitive cation channel 2, neuronal // amiloride-sensitive cation channel 2, neuronal // amiloride-sensitive cation channel 2, neuronal // amiloride-sensitive cation channel 2, neuronal // amiloride-sensitive cation channel 2, neuronal // amiloride-sensitive cation channel 2, neuronal //…		2	2	coding	12
Ache	acetylcholinesterase // acetylcholinesterase // acetylcholinesterase // acetylcholinesterase // acetylcholinesterase // acetylcholinesterase // acetylcholinesterase // acetylcholinesterase		2	2	coding	12
Acly	ATP citrate lyase // ATP citrate lyase // ATP citrate lyase // ATP citrate lyase // ATP citrate lyase // ATP citrate lyase // ATP citrate lyase // ATP citrate lyase // ATP citrate lyase // ATP citrate lyase // ATP citrate lyase // ATP citrate lyase // ATP citrate lyase // ATP citrate lyase // ATP citrate lyase // ATP citrate lyase // ATP citrate lyase // ATP citrate lyase // ATP citrate lyase // …		1	1	coding	12
Acp5	acid phosphatase 5, tartrate resistant // acid phosphatase 5, tartrate resistant // acid phosphatase 5, tartrate resistant // acid phosphatase 5, tartrate resistant // acid phosphatase 5, tartrate resistant // acid phosphatase 5, tartrate resistant // acid phosphatase 5, tartrate resistant		1	1	coding	78
Acsl3	acyl-CoA synthetase long-chain family member 3 // acyl-CoA synthetase long-chain family member 3 // acyl-CoA synthetase long-chain family member 3 // acyl-CoA synthetase long-chain family member 3 // acyl-CoA synthetase long-chain family member 3 // acyl-CoA synthetase long-chain family member 3 // UTP14, U3 small nucleolar ribonucleoprotein, homolog B (yeast) // UTP14, U3 small nucleolar ribonuc…		5	2	coding	6
Acss2	acyl-CoA synthetase short-chain family member 2 // acyl-CoA synthetase short-chain family member 2 // acyl-CoA synthetase short-chain family member 2 // acyl-CoA synthetase short-chain family member 2 // acyl-CoA synthetase short-chain family member 2 // acyl-CoA synthetase short-chain family member 2 // acyl-CoA synthetase short-chain family member 2 // acyl-CoA synthetase short-chain family mem…		1	1	coding	3
Actl6b	actin-like 6B // actin-like 6B // actin-like 6B // actin-like 6B // actin-like 6B // actin-like 6B // actin-like 6B // actin-like 6B // actin-like 6B		5	4	coding	12
Ada	adenosine deaminase // adenosine deaminase // adenosine deaminase // adenosine deaminase // adenosine deaminase // adenosine deaminase // adenosine deaminase		2	2	coding	78
Adam11	a disintegrin and metallopeptidase domain 11 // a disintegrin and metallopeptidase domain 11 // a disintegrin and metallopeptidase domain 11 // a disintegrin and metallopeptidase domain 11 // a disintegrin and metallopeptidase domain 11 // a disintegrin and metallopeptidase domain 11 // a disintegrin and metallopeptidase domain 11 // a disintegrin and metallopeptidase domain 11 // a disintegrin a…		4	4	coding	12
Adam22	a disintegrin and metallopeptidase domain 22 // a disintegrin and metallopeptidase domain 22 // a disintegrin and metallopeptidase domain 22 // a disintegrin and metallopeptidase domain 22 // a disintegrin and metallopeptidase domain 22 // a disintegrin and metallopeptidase domain 22 // a disintegrin and metallopeptidase domain 22 // a disintegrin and metallopeptidase domain 22 // a disintegrin a…		4	4	coding	12
Adam8	a disintegrin and metallopeptidase domain 8 // a disintegrin and metallopeptidase domain 8 // a disintegrin and metallopeptidase domain 8 // a disintegrin and metallopeptidase domain 8 // a disintegrin and metallopeptidase domain 8 // a disintegrin and metallopeptidase domain 8 // a disintegrin and metallopeptidase domain 8 // a disintegrin and metallopeptidase domain 8 // a disintegrin and metal…		2	2	coding	75
Adarb2	adenosine deaminase, RNA-specific, B2 // adenosine deaminase, RNA-specific, B2 // adenosine deaminase, RNA-specific, B2		1	1	coding	12
Adcy2	adenylate cyclase 2 // adenylate cyclase 2 // adenylate cyclase 2		2	2	coding	6
Adcy5	adenylate cyclase 5 // adenylate cyclase 5 // adenylate cyclase 5 // adenylate cyclase 5		2	2	coding	12
Adcy8	adenylate cyclase 8 // adenylate cyclase 8 // adenylate cyclase 8 // adenylate cyclase 8		5	3	coding	6
Adcyap1r1	adenylate cyclase activating polypeptide 1 receptor 1		3	2	coding	6
Add2	adducin 2 (beta) // adducin 2 (beta) // adducin 2 (beta)		1	1	coding	30
Adra1a	adrenergic receptor, alpha 1a // adrenergic receptor, alpha 1a // adrenergic receptor, alpha 1a // adrenergic receptor, alpha 1a // adrenergic receptor, alpha 1a // adrenergic receptor, alpha 1a // adrenergic receptor, alpha 1a		1	1	coding	12
AF529169	cDNA sequence AF529169 // cDNA sequence AF529169 // cDNA sequence AF529169 // cDNA sequence AF529169 // cDNA sequence AF529169 // cDNA sequence AF529169 // cDNA sequence AF529169 // cDNA sequence AF529169 // cDNA sequence AF529169 // cDNA sequence AF529169 // cDNA sequence AF529169		1	1	coding	6
Agtpbp1	ATP/GTP binding protein 1 // ATP/GTP binding protein 1 // ATP/GTP binding protein 1 // ATP/GTP binding protein 1 // ATP/GTP binding protein 1 // ATP/GTP binding protein 1 // ATP/GTP binding protein 1 // ATP/GTP binding protein 1 // ATP/GTP binding protein 1 // ATP/GTP binding protein 1 // ATP/GTP binding protein 1 // ATP/GTP binding protein 1		4	4	coding	12
Ahi1	Abelson helper integration site 1 // Abelson helper integration site 1 // Abelson helper integration site 1 // Abelson helper integration site 1		4	3	coding	12
AI593442	expressed sequence AI593442 // expressed sequence AI593442		3	3	coding	12
AI836003	expressed sequence AI836003 // expressed sequence AI836003 // expressed sequence AI836003 // expressed sequence AI836003 // expressed sequence AI836003 // expressed sequence AI836003		3	2	coding	6
AI854703	expressed sequence AI854703 // expressed sequence AI854703		2	2	coding	3
Ak5	adenylate kinase 5 // adenylate kinase 5		4	4	coding	12
Akap6	A kinase (PRKA) anchor protein 6 // A kinase (PRKA) anchor protein 6		1	1	coding	30
Akr1b8	aldo-keto reductase family 1, member B8 // aldo-keto reductase family 1, member B8 // aldo-keto reductase family 1, member B8 // aldo-keto reductase family 1, member B8 // aldo-keto reductase family 1, member B8 // aldo-keto reductase family 1, member B8		4	3	coding	67
Aldh5a1	aldhehyde dehydrogenase family 5, subfamily A1 // aldhehyde dehydrogenase family 5, subfamily A1 // aldhehyde dehydrogenase family 5, subfamily A1 // aldhehyde dehydrogenase family 5, subfamily A1 // aldhehyde dehydrogenase family 5, subfamily A1 // aldhehyde dehydrogenase family 5, subfamily A1		2	2	coding	6
Alox5ap	arachidonate 5-lipoxygenase activating protein // arachidonate 5-lipoxygenase activating protein // arachidonate 5-lipoxygenase activating protein // arachidonate 5-lipoxygenase activating protein // arachidonate 5-lipoxygenase activating protein // arachidonate 5-lipoxygenase activating protein // arachidonate 5-lipoxygenase activating protein		2	2	coding	78
Alox8	arachidonate 8-lipoxygenase // arachidonate 8-lipoxygenase // arachidonate 8-lipoxygenase // arachidonate 8-lipoxygenase // arachidonate 8-lipoxygenase // arachidonate 8-lipoxygenase // arachidonate 8-lipoxygenase		4	4	coding	6
Amigo1	adhesion molecule with Ig like domain 1 // adhesion molecule with Ig like domain 1 // adhesion molecule with Ig like domain 1 // adhesion molecule with Ig like domain 1 // adhesion molecule with Ig like domain 1 // adhesion molecule with Ig like domain 1 // adhesion molecule with Ig like domain 1 // adhesion molecule with Ig like domain 1 // adhesion molecule with Ig like domain 1 // adhesion mol…		2	2	coding	12
Amph	amphiphysin // amphiphysin // amphiphysin		1	1	coding	12
Angptl4	angiopoietin-like 4 // angiopoietin-like 4 // angiopoietin-like 4 // angiopoietin-like 4 // angiopoietin-like 4 // angiopoietin-like 4 // angiopoietin-like 4 // angiopoietin-like 4 // angiopoietin-like 4 // angiopoietin-like 4 // angiopoietin-like 4 // angiopoietin-like 4 // angiopoietin-like 4 // angiopoietin-like 4 // angiopoietin-like 4 // angiopoietin-like 4 // angiopoietin-like 4 // angiopoi…		1	1	coding	75
Ank3	ankyrin 3, epithelial // ankyrin 3, epithelial // ankyrin 3, epithelial		2	2	coding	30
Ankrd13d	ankyrin repeat domain 13 family, member D // ankyrin repeat domain 13 family, member D // ankyrin repeat domain 13 family, member D // ankyrin repeat domain 13 family, member D // ankyrin repeat domain 13 family, member D // ankyrin repeat domain 13 family, member D // ankyrin repeat domain 13 family, member D // ankyrin repeat domain 13 family, member D // ankyrin repeat domain 13 family, member…		2	2	coding	6
Ankrd34b	ankyrin repeat domain 34B // ankyrin repeat domain 34B // ankyrin repeat domain 34B // ankyrin repeat domain 34B // ankyrin repeat domain 34B // ankyrin repeat domain 34B // ankyrin repeat domain 34B // ankyrin repeat domain 34B // ankyrin repeat domain 34B		3	3	coding	12
Ankrd34c	ankyrin repeat domain 34C // ankyrin repeat domain 34C // ankyrin repeat domain 34C // ankyrin repeat domain 34C // ankyrin repeat domain 34C // ankyrin repeat domain 34C		1	1	coding	6
Ankrd45	ankyrin repeat domain 45 // ankyrin repeat domain 45 // ankyrin repeat domain 45 // ankyrin repeat domain 45 // ankyrin repeat domain 45 // ankyrin repeat domain 45 // ankyrin repeat domain 45 // ankyrin repeat domain 45 // ankyrin repeat domain 45		3	3	coding	6
Ano4	anoctamin 4 // anoctamin 4 // anoctamin 4		1	1	coding	12
Anxa2	annexin A2 // annexin A2 // annexin A2 // annexin A2 // annexin A2 // annexin A2		5	4	coding	67
Anxa3	annexin A3 // annexin A3 // annexin A3		3	2	coding	67
Anxa4	annexin A4 // annexin A4 // annexin A4 // annexin A4 // annexin A4 // annexin A4 // annexin A4 // annexin A4		3	3	coding	78
Ap3b2	adaptor-related protein complex 3, beta 2 subunit // adaptor-related protein complex 3, beta 2 subunit // adaptor-related protein complex 3, beta 2 subunit // adaptor-related protein complex 3, beta 2 subunit // adaptor-related protein complex 3, beta 2 subunit // adaptor-related protein complex 3, beta 2 subunit // adaptor-related protein complex 3, beta 2 subunit // adaptor-related protein comp…		1	1	coding	30
Apba1	amyloid beta (A4) precursor protein binding, family A, member 1 // amyloid beta (A4) precursor protein binding, family A, member 1 // amyloid beta (A4) precursor protein binding, family A, member 1 // amyloid beta (A4) precursor protein binding, family A, member 1		4	3	coding	12
Apba2	amyloid beta (A4) precursor protein-binding, family A, member 2 // amyloid beta (A4) precursor protein-binding, family A, member 2 // amyloid beta (A4) precursor protein-binding, family A, member 2 // amyloid beta (A4) precursor protein-binding, family A, member 2 // amyloid beta (A4) precursor protein-binding, family A, member 2 // amyloid beta (A4) precursor protein-binding, family A, member 2		3	3	coding	3
Apbb1	amyloid beta (A4) precursor protein-binding, family B, member 1 // amyloid beta (A4) precursor protein-binding, family B, member 1 // amyloid beta (A4) precursor protein-binding, family B, member 1 // amyloid beta (A4) precursor protein-binding, family B, member 1 // amyloid beta (A4) precursor protein-binding, family B, member 1 // amyloid beta (A4) precursor protein-binding, family B, member 1 …		2	2	coding	12
Apc2	adenomatosis polyposis coli 2 // adenomatosis polyposis coli 2 // adenomatosis polyposis coli 2 // adenomatosis polyposis coli 2		3	3	coding	12
Apol9b	apolipoprotein L 9b // apolipoprotein L 9b // apolipoprotein L 9b // apolipoprotein L 9b // apolipoprotein L 9a // apolipoprotein L 9a // apolipoprotein L 9a // apolipoprotein L 9a		1	1	coding	12
Ar	androgen receptor // androgen receptor // androgen receptor		1	1	coding	6
Arc	activity regulated cytoskeletal-associated protein // activity regulated cytoskeletal-associated protein // activity regulated cytoskeletal-associated protein // activity regulated cytoskeletal-associated protein // activity regulated cytoskeletal-associated protein // activity regulated cytoskeletal-associated protein // activity regulated cytoskeletal-associated protein // activity regulated cy…		2	2	coding	12
Arhgap26	Rho GTPase activating protein 26 // Rho GTPase activating protein 26 // Rho GTPase activating protein 26 // Rho GTPase activating protein 26		6	4	coding	12
Arhgap32	Rho GTPase activating protein 32 // Rho GTPase activating protein 32 // Rho GTPase activating protein 32 // Rho GTPase activating protein 32 // Rho GTPase activating protein 32 // Rho GTPase activating protein 32 // Rho GTPase activating protein 32		4	3	coding	6
Arhgap44	Rho GTPase activating protein 44 // Rho GTPase activating protein 44 // Rho GTPase activating protein 44 // Rho GTPase activating protein 44 // Rho GTPase activating protein 44 // Rho GTPase activating protein 44 // Rho GTPase activating protein 44 // Rho GTPase activating protein 44 // Rho GTPase activating protein 44 // Rho GTPase activating protein 44 // Rho GTPase activating protein 44 // Rho…		2	2	coding	12
Arhgdig	Rho GDP dissociation inhibitor (GDI) gamma // Rho GDP dissociation inhibitor (GDI) gamma // Rho GDP dissociation inhibitor (GDI) gamma // Rho GDP dissociation inhibitor (GDI) gamma // Rho GDP dissociation inhibitor (GDI) gamma // Rho GDP dissociation inhibitor (GDI) gamma // Rho GDP dissociation inhibitor (GDI) gamma // Rho GDP dissociation inhibitor (GDI) gamma // Rho GDP dissociation inhibitor …		4	3	coding	12
Arhgef4	Rho guanine nucleotide exchange factor (GEF) 4 // Rho guanine nucleotide exchange factor (GEF) 4 // Rho guanine nucleotide exchange factor (GEF) 4 // Rho guanine nucleotide exchange factor (GEF) 4 // Rho guanine nucleotide exchange factor (GEF) 4 // Rho guanine nucleotide exchange factor (GEF) 4		3	3	coding	6
Arl11	ADP-ribosylation factor-like 11 // ADP-ribosylation factor-like 11 // ADP-ribosylation factor-like 11 // ADP-ribosylation factor-like 11 // ADP-ribosylation factor-like 11 // ADP-ribosylation factor-like 11		1	1	coding	78
Armcx1	armadillo repeat containing, X-linked 1 // armadillo repeat containing, X-linked 1 // armadillo repeat containing, X-linked 1 // armadillo repeat containing, X-linked 1 // armadillo repeat containing, X-linked 1 // armadillo repeat containing, X-linked 1 // armadillo repeat containing, X-linked 1 // armadillo repeat containing, X-linked 1 // armadillo repeat containing, X-linked 1 // armadillo re…		2	2	coding	6
Arpc3	actin related protein 2/3 complex, subunit 3 // actin related protein 2/3 complex, subunit 3 // actin related protein 2/3 complex, subunit 3 // actin related protein 2/3 complex, subunit 3 // actin related protein 2/3 complex, subunit 3 // actin related protein 2/3 complex, subunit 3 // actin related protein 2/3 complex, subunit 3		2	2	coding	78
Arpc5	actin related protein 2/3 complex, subunit 5 // actin related protein 2/3 complex, subunit 5 // actin related protein 2/3 complex, subunit 5 // actin related protein 2/3 complex, subunit 5		2	2	coding	78
Arpp21	cyclic AMP-regulated phosphoprotein, 21 // cyclic AMP-regulated phosphoprotein, 21 // cyclic AMP-regulated phosphoprotein, 21 // cyclic AMP-regulated phosphoprotein, 21 // cyclic AMP-regulated phosphoprotein, 21 // cyclic AMP-regulated phosphoprotein, 21 // cyclic AMP-regulated phosphoprotein, 21 // cyclic AMP-regulated phosphoprotein, 21 // cyclic AMP-regulated phosphoprotein, 21 // cyclic AMP-r…		5	5	coding	12
Arxes1	adipocyte-related X-chromosome expressed sequence 1 // adipocyte-related X-chromosome expressed sequence 2 // adipocyte-related X-chromosome expressed sequence 1 // adipocyte-related X-chromosome expressed sequence 2 // adipocyte-related X-chromosome expressed sequence 2 // adipocyte-related X-chromosome expressed sequence 1 // adipocyte-related X-chromosome expressed sequence 1 // adipocyte-rela…		1	1	coding	12
Asah2	N-acylsphingosine amidohydrolase 2 // N-acylsphingosine amidohydrolase 2 // N-acylsphingosine amidohydrolase 2 // N-acylsphingosine amidohydrolase 2 // N-acylsphingosine amidohydrolase 2 // N-acylsphingosine amidohydrolase 2 // N-acylsphingosine amidohydrolase 2		3	2	coding	6
Asb13	ankyrin repeat and SOCS box-containing 13 // ankyrin repeat and SOCS box-containing 13 // ankyrin repeat and SOCS box-containing 13 // ankyrin repeat and SOCS box-containing 13 // ankyrin repeat and SOCS box-containing 13 // ankyrin repeat and SOCS box-containing 13 // ankyrin repeat and SOCS box-containing 13 // ankyrin repeat and SOCS box-containing 13 // ankyrin repeat and SOCS box-containing …		3	3	coding	6
Asphd2	aspartate beta-hydroxylase domain containing 2 // aspartate beta-hydroxylase domain containing 2 // aspartate beta-hydroxylase domain containing 2		3	3	coding	12
Atcay	ataxia, cerebellar, Cayman type homolog (human) // ataxia, cerebellar, Cayman type homolog (human) // ataxia, cerebellar, Cayman type homolog (human) // ataxia, cerebellar, Cayman type homolog (human) // ataxia, cerebellar, Cayman type homolog (human) // ataxia, cerebellar, Cayman type homolog (human) // ataxia, cerebellar, Cayman type homolog (human) // ataxia, cerebellar, Cayman type homolog (h…		2	2	coding	3
Atl1	atlastin GTPase 1 // atlastin GTPase 1 // atlastin GTPase 1		3	3	coding	12
Atp1b1	ATPase, Na+/K+ transporting, beta 1 polypeptide // ATPase, Na+/K+ transporting, beta 1 polypeptide // ATPase, Na+/K+ transporting, beta 1 polypeptide		2	2	coding	12
Atp2b3	ATPase, Ca++ transporting, plasma membrane 3 // ATPase, Ca++ transporting, plasma membrane 3 // ATPase, Ca++ transporting, plasma membrane 3 // ATPase, Ca++ transporting, plasma membrane 3 // ATPase, Ca++ transporting, plasma membrane 3 // ATPase, Ca++ transporting, plasma membrane 3 // ATPase, Ca++ transporting, plasma membrane 3 // ATPase, Ca++ transporting, plasma membrane 3		2	2	coding	12
Atp6v0e2	ATPase, H+ transporting, lysosomal V0 subunit E2 // ATPase, H+ transporting, lysosomal V0 subunit E2 // ATPase, H+ transporting, lysosomal V0 subunit E2 // ATPase, H+ transporting, lysosomal V0 subunit E2 // ATPase, H+ transporting, lysosomal V0 subunit E2 // ATPase, H+ transporting, lysosomal V0 subunit E2		1	1	coding	3
Atp8a2	ATPase, aminophospholipid transporter-like, class I, type 8A, member 2 // ATPase, aminophospholipid transporter-like, class I, type 8A, member 2 // ATPase, aminophospholipid transporter-like, class I, type 8A, member 2		2	2	coding	3
Atp9a	ATPase, class II, type 9A // ATPase, class II, type 9A // ATPase, class II, type 9A // ATPase, class II, type 9A // ATPase, class II, type 9A // ATPase, class II, type 9A // ATPase, class II, type 9A // ATPase, class II, type 9A // ATPase, class II, type 9A		3	3	coding	3
Atpaf1	ATP synthase mitochondrial F1 complex assembly factor 1 // ATP synthase mitochondrial F1 complex assembly factor 1 // ATP synthase mitochondrial F1 complex assembly factor 1 // ATP synthase mitochondrial F1 complex assembly factor 1 // ATP synthase mitochondrial F1 complex assembly factor 1 // ATP synthase mitochondrial F1 complex assembly factor 1 // ATP synthase mitochondrial F1 complex assembl…		1	1	coding	3
AW555464	expressed sequence AW555464 // expressed sequence AW555464 // expressed sequence AW555464 // expressed sequence AW555464 // expressed sequence AW555464 // expressed sequence AW555464 // expressed sequence AW555464 // expressed sequence AW555464		1	1	coding	12
B630019K06Rik	novel protein similar to F-box and leucine-rich repeat protein 17 (Fbxl17) // novel protein similar to F-box and leucine-rich repeat protein 17 (Fbxl17) // novel protein similar to F-box and leucine-rich repeat protein 17 (Fbxl17) // novel protein similar to F-box and leucine-rich repeat protein 17 (Fbxl17)		4	4	coding	12
Bai1	brain-specific angiogenesis inhibitor 1 // brain-specific angiogenesis inhibitor 1 // brain-specific angiogenesis inhibitor 1 // brain-specific angiogenesis inhibitor 1 // brain-specific angiogenesis inhibitor 1		2	2	coding	12
Bai3	brain-specific angiogenesis inhibitor 3 // brain-specific angiogenesis inhibitor 3 // brain-specific angiogenesis inhibitor 3 // brain-specific angiogenesis inhibitor 3 // brain-specific angiogenesis inhibitor 3		5	3	coding	6
Bak1	BCL2-antagonist/killer 1 // BCL2-antagonist/killer 1 // BCL2-antagonist/killer 1 // BCL2-antagonist/killer 1 // BCL2-antagonist/killer 1 // BCL2-antagonist/killer 1 // BCL2-antagonist/killer 1 // BCL2-antagonist/killer 1 // gametogenetin binding protein 1 // BCL2-antagonist/killer 1 // BCL2-antagonist/killer 1		2	2	coding	75
BC018242	cDNA sequence BC018242 // cDNA sequence BC018242 // cDNA sequence BC018242 // cDNA sequence BC018242 // cDNA sequence BC018242 // cDNA sequence BC018242		2	2	coding	12
Bend6	BEN domain containing 6 // BEN domain containing 6 // BEN domain containing 6 // BEN domain containing 6 // BEN domain containing 6 // BEN domain containing 6		3	3	coding	6
Bend7	BEN domain containing 7 // BEN domain containing 7 // BEN domain containing 7 // BEN domain containing 7 // BEN domain containing 7 // BEN domain containing 7 // BEN domain containing 7 // BEN domain containing 7 // BEN domain containing 7 // BEN domain containing 7 // BEN domain containing 7 // BEN domain containing 7 // BEN domain containing 7 // BEN domain containing 7 // BEN domain containing…		4	3	coding	12
Bex1	brain expressed gene 1 // brain expressed gene 1 // brain expressed gene 1 // brain expressed gene 1 // brain expressed gene 1 // brain expressed gene 1 // brain expressed gene 1 // brain expressed gene 1 // brain expressed X-linked 2 // brain expressed X-linked 2 // brain expressed gene 1 // brain expressed gene 1 // brain expressed X-linked 2 // brain expressed gene 1		2	2	coding	6
Bex2	brain expressed X-linked 2 // brain expressed X-linked 2 // nerve growth factor receptor (TNFRSF16) associated protein 1 // nerve growth factor receptor (TNFRSF16) associated protein 1 // nerve growth factor receptor (TNFRSF16) associated protein 1 // brain expressed X-linked 2 // brain expressed X-linked 2 // brain expressed X-linked 2 // brain expressed X-linked 2		1	1	coding	30
Bicd1	bicaudal D homolog 1 (Drosophila) // bicaudal D homolog 1 (Drosophila) // bicaudal D homolog 1 (Drosophila) // bicaudal D homolog 1 (Drosophila) // bicaudal D homolog 1 (Drosophila) // bicaudal D homolog 1 (Drosophila) // bicaudal D homolog 1 (Drosophila)		1	1	coding	12
Birc5	baculoviral IAP repeat-containing 5 // baculoviral IAP repeat-containing 5 // baculoviral IAP repeat-containing 5 // baculoviral IAP repeat-containing 5 // baculoviral IAP repeat-containing 5 // baculoviral IAP repeat-containing 5 // baculoviral IAP repeat-containing 5 // baculoviral IAP repeat-containing 5 // baculoviral IAP repeat-containing 5 // baculoviral IAP repeat-containing 5 // baculovir…		2	2	coding	78
Bnip2	BCL2/adenovirus E1B interacting protein 2 // BCL2/adenovirus E1B interacting protein 2 // BCL2/adenovirus E1B interacting protein 2 // BCL2/adenovirus E1B interacting protein 2 // BCL2/adenovirus E1B interacting protein 2 // BCL2/adenovirus E1B interacting protein 2 // BCL2/adenovirus E1B interacting protein 2		2	2	coding	78
Brsk2	BR serine/threonine kinase 2 // BR serine/threonine kinase 2 // BR serine/threonine kinase 2 // BR serine/threonine kinase 2 // BR serine/threonine kinase 2		2	2	coding	12
Bsn	bassoon // bassoon // bassoon // bassoon		2	2	coding	12
Bst1	bone marrow stromal cell antigen 1 // bone marrow stromal cell antigen 1 // bone marrow stromal cell antigen 1 // bone marrow stromal cell antigen 1 // bone marrow stromal cell antigen 1 // bone marrow stromal cell antigen 1 // bone marrow stromal cell antigen 1 // bone marrow stromal cell antigen 1		4	4	coding	75
Btbd11	BTB (POZ) domain containing 11 // BTB (POZ) domain containing 11 // BTB (POZ) domain containing 11 // BTB (POZ) domain containing 11 // BTB (POZ) domain containing 11 // BTB (POZ) domain containing 11 // BTB (POZ) domain containing 11		2	2	coding	12
Btg1	B cell translocation gene 1, anti-proliferative // B cell translocation gene 1, anti-proliferative // B cell translocation gene 1, anti-proliferative // B cell translocation gene 1, anti-proliferative // B cell translocation gene 1, anti-proliferative		2	2	coding	78
C3ar1	complement component 3a receptor 1 // complement component 3a receptor 1 // complement component 3a receptor 1 // complement component 3a receptor 1 // complement component 3a receptor 1 // complement component 3a receptor 1		1	1	coding	67
Cabp7	calcium binding protein 7 // calcium binding protein 7 // calcium binding protein 7 // calcium binding protein 7		1	1	coding	30
Cacfd1	calcium channel flower domain containing 1 // calcium channel flower domain containing 1 // calcium channel flower domain containing 1 // calcium channel flower domain containing 1 // calcium channel flower domain containing 1 // calcium channel flower domain containing 1 // calcium channel flower domain containing 1 // calcium channel flower domain containing 1		3	3	coding	12
Cacna1b	calcium channel, voltage-dependent, N type, alpha 1B subunit // calcium channel, voltage-dependent, N type, alpha 1B subunit // calcium channel, voltage-dependent, N type, alpha 1B subunit // calcium channel, voltage-dependent, N type, alpha 1B subunit // calcium channel, voltage-dependent, N type, alpha 1B subunit // calcium channel, voltage-dependent, N type, alpha 1B subunit // calcium channel…		2	2	coding	12
Cacna1e	calcium channel, voltage-dependent, R type, alpha 1E subunit // calcium channel, voltage-dependent, R type, alpha 1E subunit // calcium channel, voltage-dependent, R type, alpha 1E subunit		7	6	coding	12
Cacna2d2	calcium channel, voltage-dependent, alpha 2/delta subunit 2 // calcium channel, voltage-dependent, alpha 2/delta subunit 2 // calcium channel, voltage-dependent, alpha 2/delta subunit 2 // calcium channel, voltage-dependent, alpha 2/delta subunit 2 // calcium channel, voltage-dependent, alpha 2/delta subunit 2 // calcium channel, voltage-dependent, alpha 2/delta subunit 2 // calcium channel, volt…		3	3	coding	12
Cacnb2	calcium channel, voltage-dependent, beta 2 subunit // calcium channel, voltage-dependent, beta 2 subunit // calcium channel, voltage-dependent, beta 2 subunit // calcium channel, voltage-dependent, beta 2 subunit		2	2	coding	6
Cadm3	cell adhesion molecule 3 // cell adhesion molecule 3 // cell adhesion molecule 3 // cell adhesion molecule 3 // cell adhesion molecule 3 // cell adhesion molecule 3		2	2	coding	12
Cadps	Ca2+-dependent secretion activator // Ca2+-dependent secretion activator // Ca2+-dependent secretion activator // Ca2+-dependent secretion activator // Ca2+-dependent secretion activator // Ca2+-dependent secretion activator		3	3	coding	12
Calb1	calbindin 1 // calbindin 1 // calbindin 1 // calbindin 1 // calbindin 1 // calbindin 1 // calbindin 1 // calbindin 1		5	3	coding	12
Calu	calumenin // calumenin // calumenin // calumenin // calumenin // calumenin		3	2	coding	78
Caly	calcyon neuron-specific vesicular protein // calcyon neuron-specific vesicular protein // calcyon neuron-specific vesicular protein // calcyon neuron-specific vesicular protein // calcyon neuron-specific vesicular protein // calcyon neuron-specific vesicular protein // calcyon neuron-specific vesicular protein // calcyon neuron-specific vesicular protein // calcyon neuron-specific vesicular prote…		3	3	coding	12
Camk1g	calcium/calmodulin-dependent protein kinase I gamma // calcium/calmodulin-dependent protein kinase I gamma // calcium/calmodulin-dependent protein kinase I gamma // calcium/calmodulin-dependent protein kinase I gamma // calcium/calmodulin-dependent protein kinase I gamma // calcium/calmodulin-dependent protein kinase I gamma // calcium/calmodulin-dependent protein kinase I gamma		1	1	coding	12
Camk2b	calcium/calmodulin-dependent protein kinase II, beta // calcium/calmodulin-dependent protein kinase II, beta // calcium/calmodulin-dependent protein kinase II, beta // calcium/calmodulin-dependent protein kinase II, beta // calcium/calmodulin-dependent protein kinase II, beta // calcium/calmodulin-dependent protein kinase II, beta // calcium/calmodulin-dependent protein kinase II, beta // calcium…		1	1	coding	12
Camk2g	calcium/calmodulin-dependent protein kinase II gamma // calcium/calmodulin-dependent protein kinase II gamma // calcium/calmodulin-dependent protein kinase II gamma // calcium/calmodulin-dependent protein kinase II gamma // calcium/calmodulin-dependent protein kinase II gamma // calcium/calmodulin-dependent protein kinase II gamma // calcium/calmodulin-dependent protein kinase II gamma		4	4	coding	6
Camkk1	calcium/calmodulin-dependent protein kinase kinase 1, alpha // calcium/calmodulin-dependent protein kinase kinase 1, alpha // calcium/calmodulin-dependent protein kinase kinase 1, alpha // calcium/calmodulin-dependent protein kinase kinase 1, alpha // calcium/calmodulin-dependent protein kinase kinase 1, alpha // calcium/calmodulin-dependent protein kinase kinase 1, alpha // calcium/calmodulin-de…		2	2	coding	12
Camkv	CaM kinase-like vesicle-associated // CaM kinase-like vesicle-associated // CaM kinase-like vesicle-associated // CaM kinase-like vesicle-associated // CaM kinase-like vesicle-associated // CaM kinase-like vesicle-associated		3	3	coding	12
Camsap3	calmodulin regulated spectrin-associated protein family, member 3 // calmodulin regulated spectrin-associated protein family, member 3 // calmodulin regulated spectrin-associated protein family, member 3 // calmodulin regulated spectrin-associated protein family, member 3 // calmodulin regulated spectrin-associated protein family, member 3 // calmodulin regulated spectrin-associated protein famil…		1	1	coding	12
Camta2	calmodulin binding transcription activator 2 // calmodulin binding transcription activator 2 // calmodulin binding transcription activator 2 // calmodulin binding transcription activator 2 // calmodulin binding transcription activator 2 // calmodulin binding transcription activator 2 // calmodulin binding transcription activator 2 // calmodulin binding transcription activator 2 // calmodulin bind…		4	3	coding	6
Cap2	CAP, adenylate cyclase-associated protein, 2 (yeast) // CAP, adenylate cyclase-associated protein, 2 (yeast) // CAP, adenylate cyclase-associated protein, 2 (yeast)		3	3	coding	12
Capg	capping protein (actin filament), gelsolin-like // capping protein (actin filament), gelsolin-like // capping protein (actin filament), gelsolin-like // capping protein (actin filament), gelsolin-like // capping protein (actin filament), gelsolin-like // capping protein (actin filament), gelsolin-like // capping protein (actin filament), gelsolin-like // capping protein (actin filament), gelsolin…		3	3	coding	78
Car11	carbonic anhydrase 11 // carbonic anhydrase 11 // carbonic anhydrase 11 // carbonic anhydrase 11 // carbonic anhydrase 11 // carbonic anhydrase 11 // carbonic anhydrase 11 // carbonic anhydrase 11		3	2	coding	6
Car4	carbonic anhydrase 4 // carbonic anhydrase 4 // carbonic anhydrase 4 // carbonic anhydrase 4 // carbonic anhydrase 4 // carbonic anhydrase 4 // carbonic anhydrase 4 // carbonic anhydrase 4 // carbonic anhydrase 4 // carbonic anhydrase 4 // carbonic anhydrase 4		2	2	coding	12
Caskin1	CASK interacting protein 1 // CASK interacting protein 1 // CASK interacting protein 1 // CASK interacting protein 1 // CASK interacting protein 1 // CASK interacting protein 1 // CASK interacting protein 1 // CASK interacting protein 1 // CASK interacting protein 1 // CASK interacting protein 1		2	2	coding	12
Casp8	caspase 8 // caspase 8 // caspase 8 // caspase 8 // caspase 8		2	2	coding	78
Cav1	caveolin 1, caveolae protein // caveolin 1, caveolae protein // caveolin 1, caveolae protein // caveolin 1, caveolae protein // caveolin 1, caveolae protein // caveolin 1, caveolae protein // caveolin 1, caveolae protein		3	2	coding	67
Cbln1	cerebellin 1 precursor protein // cerebellin 1 precursor protein // cerebellin 1 precursor protein // cerebellin 1 precursor protein // cerebellin 1 precursor protein // cerebellin 1 precursor protein // cerebellin 1 precursor protein // cerebellin 1 precursor protein		2	2	coding	12
Cbln2	cerebellin 2 precursor protein // cerebellin 2 precursor protein // cerebellin 2 precursor protein // cerebellin 2 precursor protein // cerebellin 2 precursor protein // cerebellin 2 precursor protein		4	4	coding	12
Ccdc149	coiled-coil domain containing 149 // coiled-coil domain containing 149 // coiled-coil domain containing 149 // coiled-coil domain containing 149		1	1	coding	12
Ccdc19	coiled-coil domain containing 19 // coiled-coil domain containing 19 // transgelin 2 // transgelin 2 // coiled-coil domain containing 19 // transgelin 2		4	3	coding	67
Ccdc8	coiled-coil domain containing 8 // coiled-coil domain containing 8 // PNMA-like 1 // PNMA-like 1 // PNMA-like 1		2	2	coding	12
Ccdc85a	coiled-coil domain containing 85A // coiled-coil domain containing 85A // coiled-coil domain containing 85A // coiled-coil domain containing 85A // coiled-coil domain containing 85A // coiled-coil domain containing 85A // coiled-coil domain containing 85A // coiled-coil domain containing 85A		4	3	coding	6
Cck	cholecystokinin // cholecystokinin // cholecystokinin // cholecystokinin // cholecystokinin // cholecystokinin		3	3	coding	3
Cckbr	cholecystokinin B receptor // cholecystokinin B receptor // cholecystokinin B receptor // cholecystokinin B receptor		3	2	coding	12
Ccr1	chemokine (C-C motif) receptor 1 // chemokine (C-C motif) receptor 1 // chemokine (C-C motif) receptor 1 // chemokine (C-C motif) receptor 1 // chemokine (C-C motif) receptor 1 // chemokine (C-C motif) receptor 1		4	3	coding	75
Cd109	CD109 antigen // CD109 antigen // CD109 antigen // CD109 antigen // CD109 antigen // CD109 antigen		1	1	coding	67
Cd180	CD180 antigen // CD180 antigen // CD180 antigen		4	3	coding	75
Cd300ld	CD300 molecule-like family member d // CD300 molecule-like family member d // CD300 molecule-like family member d // CD300 molecule-like family member d // CD300 molecule-like family member d // CD300 molecule-like family member d		4	3	coding	78
Cd53	CD53 antigen // CD53 antigen // CD53 antigen		1	1	coding	78
Cd84	CD84 antigen // CD84 antigen // CD84 antigen // CD84 antigen // CD84 antigen // CD84 antigen // CD84 antigen // CD84 antigen // CD84 antigen // CD84 antigen // CD84 antigen // CD84 antigen		2	2	coding	78
Cd93	CD93 antigen // CD93 antigen // CD93 antigen // CD93 antigen // CD93 antigen		1	1	coding	78
Cdca7l	cell division cycle associated 7 like // cell division cycle associated 7 like // cell division cycle associated 7 like // cell division cycle associated 7 like // cell division cycle associated 7 like // cell division cycle associated 7 like // cell division cycle associated 7 like // cell division cycle associated 7 like		1	1	coding	78
Cdh10	cadherin 10 // cadherin 10 // cadherin 10 // cadherin 10 // cadherin 10 // cadherin 10		2	2	coding	6
Cdh12	cadherin 12 // cadherin 12 // cadherin 12		6	3	coding	6
Cdh7	cadherin 7, type 2 // cadherin 7, type 2 // cadherin 7, type 2 // cadherin 7, type 2 // cadherin 7, type 2 // cadherin 7, type 2 // cadherin 7, type 2 // cadherin 7, type 2 // cadherin 7, type 2		2	2	coding	3
Cdh8	cadherin 8 // cadherin 8 // cadherin 8 // cadherin 8 // cadherin 8 // cadherin 8		6	4	coding	12
Cdk2	cyclin-dependent kinase 2 // cyclin-dependent kinase 2 // cyclin-dependent kinase 2 // cyclin-dependent kinase 2 // cyclin-dependent kinase 2 // cyclin-dependent kinase 2 // cyclin-dependent kinase 2 // cyclin-dependent kinase 2 // cyclin-dependent kinase 2 // cyclin-dependent kinase 2		3	2	coding	78
Cdk5r1	cyclin-dependent kinase 5, regulatory subunit 1 (p35) // cyclin-dependent kinase 5, regulatory subunit 1 (p35) // cyclin-dependent kinase 5, regulatory subunit 1 (p35) // cyclin-dependent kinase 5, regulatory subunit 1 (p35) // cyclin-dependent kinase 5, regulatory subunit 1 (p35) // cyclin-dependent kinase 5, regulatory subunit 1 (p35) // cyclin-dependent kinase 5, regulatory subunit 1 (p35) // …		6	6	coding	12
Cdkl1	cyclin-dependent kinase-like 1 (CDC2-related kinase) // cyclin-dependent kinase-like 1 (CDC2-related kinase) // cyclin-dependent kinase-like 1 (CDC2-related kinase)		3	3	coding	12
Cds1	CDP-diacylglycerol synthase 1 // CDP-diacylglycerol synthase 1 // CDP-diacylglycerol synthase 1		2	2	coding	3
Cdt1	chromatin licensing and DNA replication factor 1 // chromatin licensing and DNA replication factor 1 // chromatin licensing and DNA replication factor 1 // chromatin licensing and DNA replication factor 1 // chromatin licensing and DNA replication factor 1 // chromatin licensing and DNA replication factor 1		6	4	coding	75
Cend1	cell cycle exit and neuronal differentiation 1 // cell cycle exit and neuronal differentiation 1 // cell cycle exit and neuronal differentiation 1 // cell cycle exit and neuronal differentiation 1 // cell cycle exit and neuronal differentiation 1 // cell cycle exit and neuronal differentiation 1 // cell cycle exit and neuronal differentiation 1 // cell cycle exit and neuronal differentiation 1 //…		1	1	coding	30
Cenpa	centromere protein A // centromere protein A // centromere protein A // centromere protein A // centromere protein A // centromere protein A // centromere protein A // centromere protein A // centromere protein A // centromere protein A // centromere protein A		2	2	coding	78
Chat	choline acetyltransferase // choline acetyltransferase // choline acetyltransferase // choline acetyltransferase // choline acetyltransferase // choline acetyltransferase // choline acetyltransferase // choline acetyltransferase		2	2	coding	6
Chchd10	coiled-coil-helix-coiled-coil-helix domain containing 10 // coiled-coil-helix-coiled-coil-helix domain containing 10 // coiled-coil-helix-coiled-coil-helix domain containing 10 // coiled-coil-helix-coiled-coil-helix domain containing 10 // coiled-coil-helix-coiled-coil-helix domain containing 10 // coiled-coil-helix-coiled-coil-helix domain containing 10		2	2	coding	12
Chic1	cysteine-rich hydrophobic domain 1 // cysteine-rich hydrophobic domain 1 // cysteine-rich hydrophobic domain 1 // cysteine-rich hydrophobic domain 1 // cysteine-rich hydrophobic domain 1 // cysteine-rich hydrophobic domain 1 // cysteine-rich hydrophobic domain 1 // cysteine-rich hydrophobic domain 1		1	1	coding	6
Chn1	chimerin (chimaerin) 1 // chimerin (chimaerin) 1 // chimerin (chimaerin) 1 // chimerin (chimaerin) 1 // chimerin (chimaerin) 1 // chimerin (chimaerin) 1 // chimerin (chimaerin) 1 // chimerin (chimaerin) 1 // chimerin (chimaerin) 1		1	1	coding	12
Chrm2	cholinergic receptor, muscarinic 2, cardiac // cholinergic receptor, muscarinic 2, cardiac		2	2	coding	12
Chrna4	cholinergic receptor, nicotinic, alpha polypeptide 4 // cholinergic receptor, nicotinic, alpha polypeptide 4 // cholinergic receptor, nicotinic, alpha polypeptide 4 // cholinergic receptor, nicotinic, alpha polypeptide 4 // cholinergic receptor, nicotinic, alpha polypeptide 4 // cholinergic receptor, nicotinic, alpha polypeptide 4 // cholinergic receptor, nicotinic, alpha polypeptide 4		5	4	coding	6
Chrna7	cholinergic receptor, nicotinic, alpha polypeptide 7 // cholinergic receptor, nicotinic, alpha polypeptide 7 // cholinergic receptor, nicotinic, alpha polypeptide 7 // cholinergic receptor, nicotinic, alpha polypeptide 7 // cholinergic receptor, nicotinic, alpha polypeptide 7		1	1	coding	6
Chrnb2	cholinergic receptor, nicotinic, beta polypeptide 2 (neuronal) // cholinergic receptor, nicotinic, beta polypeptide 2 (neuronal) // cholinergic receptor, nicotinic, beta polypeptide 2 (neuronal) // cholinergic receptor, nicotinic, beta polypeptide 2 (neuronal) // cholinergic receptor, nicotinic, beta polypeptide 2 (neuronal) // cholinergic receptor, nicotinic, beta polypeptide 2 (neuronal)		1	1	coding	3
Cit	citron // citron		6	5	coding	12
Clcn6	chloride channel 6 // chloride channel 6 // chloride channel 6 // chloride channel 6 // chloride channel 6 // chloride channel 6 // chloride channel 6 // chloride channel 6 // chloride channel 6 // chloride channel 6 // chloride channel 6 // chloride channel 6 // chloride channel 6 // chloride channel 6		2	2	coding	12
Clec2i	C-type lectin domain family 2, member i // C-type lectin domain family 2, member i // C-type lectin domain family 2, member i		1	1	coding	51
Clec4d	C-type lectin domain family 4, member d // C-type lectin domain family 4, member d // C-type lectin domain family 4, member d // C-type lectin domain family 4, member d // C-type lectin domain family 4, member d // C-type lectin domain family 4, member d // C-type lectin domain family 4, member d // C-type lectin domain family 4, member d		3	3	coding	75
Clec5a	C-type lectin domain family 5, member a // C-type lectin domain family 5, member a // C-type lectin domain family 5, member a // C-type lectin domain family 5, member a // C-type lectin domain family 5, member a // C-type lectin domain family 5, member a // C-type lectin domain family 5, member a // C-type lectin domain family 5, member a // C-type lectin domain family 5, member a // C-type lecti…		1	1	coding	78
Clic1	chloride intracellular channel 1 // chloride intracellular channel 1 // chloride intracellular channel 1 // chloride intracellular channel 1 // chloride intracellular channel 1 // chloride intracellular channel 1 // chloride intracellular channel 1		1	1	coding	67
Clip4	CAP-GLY domain containing linker protein family, member 4 // CAP-GLY domain containing linker protein family, member 4 // CAP-GLY domain containing linker protein family, member 4 // CAP-GLY domain containing linker protein family, member 4 // CAP-GLY domain containing linker protein family, member 4 // CAP-GLY domain containing linker protein family, member 4 // CAP-GLY domain containing linker …		2	2	coding	6
Clstn1	calsyntenin 1 // calsyntenin 1 // calsyntenin 1 // calsyntenin 1 // calsyntenin 1 // calsyntenin 1		2	2	coding	12
Clstn2	calsyntenin 2 // calsyntenin 2 // calsyntenin 2		4	4	coding	12
Clstn3	calsyntenin 3 // calsyntenin 3 // calsyntenin 3 // calsyntenin 3 // calsyntenin 3 // calsyntenin 3 // calsyntenin 3 // calsyntenin 3		1	1	coding	30
Clvs2	clavesin 2 // clavesin 2 // clavesin 2 // clavesin 2		2	2	coding	12
Cndp2	CNDP dipeptidase 2 (metallopeptidase M20 family) // CNDP dipeptidase 2 (metallopeptidase M20 family) // CNDP dipeptidase 2 (metallopeptidase M20 family) // CNDP dipeptidase 2 (metallopeptidase M20 family) // CNDP dipeptidase 2 (metallopeptidase M20 family) // CNDP dipeptidase 2 (metallopeptidase M20 family) // CNDP dipeptidase 2 (metallopeptidase M20 family) // CNDP dipeptidase 2 (metallopeptidas…		2	2	coding	75
Cnn2	calponin 2 // calponin 2 // calponin 2 // calponin 2 // calponin 2 // calponin 2		1	1	coding	78
Cnnm1	cyclin M1 // cyclin M1 // cyclin M1 // cyclin M1 // cyclin M1		1	1	coding	12
Cnr1	cannabinoid receptor 1 (brain) // cannabinoid receptor 1 (brain) // cannabinoid receptor 1 (brain) // cannabinoid receptor 1 (brain) // cannabinoid receptor 1 (brain)		2	2	coding	3
Cntfr	ciliary neurotrophic factor receptor // ciliary neurotrophic factor receptor // ciliary neurotrophic factor receptor // ciliary neurotrophic factor receptor // ciliary neurotrophic factor receptor // ciliary neurotrophic factor receptor // ciliary neurotrophic factor receptor // ciliary neurotrophic factor receptor // ciliary neurotrophic factor receptor // ciliary neurotrophic factor receptor //…		4	4	coding	6
Cntn3	contactin 3 // contactin 3 // contactin 3 // contactin 3		4	3	coding	6
Cntn4	contactin 4 // contactin 4 // contactin 4 // contactin 4 // contactin 4 // contactin 4 // contactin 4 // contactin 4		4	4	coding	12
Cntn6	contactin 6 // contactin 6 // contactin 6 // contactin 6		1	1	coding	6
Cntnap1	contactin associated protein-like 1 // contactin associated protein-like 1 // contactin associated protein-like 1 // contactin associated protein-like 1 // contactin associated protein-like 1 // contactin associated protein-like 1 // contactin associated protein-like 1 // contactin associated protein-like 1		1	1	coding	30
Col4a2	collagen, type IV, alpha 2 // collagen, type IV, alpha 2 // collagen, type IV, alpha 2 // collagen, type IV, alpha 2		2	2	coding	78
Coro2b	coronin, actin binding protein, 2B // coronin, actin binding protein, 2B // coronin, actin binding protein, 2B // coronin, actin binding protein, 2B		3	3	coding	12
Coro6	coronin 6 // coronin 6 // coronin 6 // coronin 6 // coronin 6 // coronin 6 // coronin 6 // coronin 6 // coronin 6 // coronin 6 // coronin 6 // coronin 6 // coronin 6 // coronin 6 // coronin 6 // coronin 6 // coronin 6 // coronin 6		4	4	coding	12
Cotl1	coactosin-like 1 (Dictyostelium) // coactosin-like 1 (Dictyostelium) // coactosin-like 1 (Dictyostelium) // coactosin-like 1 (Dictyostelium) // coactosin-like 1 (Dictyostelium) // coactosin-like 1 (Dictyostelium) // coactosin-like 1 (Dictyostelium) // coactosin-like 1 (Dictyostelium)		1	1	coding	78
Cpeb3	cytoplasmic polyadenylation element binding protein 3 // cytoplasmic polyadenylation element binding protein 3 // cytoplasmic polyadenylation element binding protein 3 // cytoplasmic polyadenylation element binding protein 3 // cytoplasmic polyadenylation element binding protein 3 // cytoplasmic polyadenylation element binding protein 3 // cytoplasmic polyadenylation element binding protein 3 // …		4	3	coding	6
Cplx2	complexin 2 // complexin 2		4	3	coding	6
Cpne4	copine IV // copine IV // copine IV		7	6	coding	12
Cpne6	copine VI // copine VI // copine VI // copine VI // copine VI // copine VI // copine VI // copine VI // copine VI // copine VI // copine VI // copine VI // copine VI // copine VI // copine VI // copine VI // copine VI // copine VI // copine VI // copine VI // copine VI		7	6	coding	12
Cpne9	copine family member IX // copine family member IX // copine family member IX // copine family member IX // copine family member IX // copine family member IX // copine family member IX // copine family member IX // copine family member IX // copine family member IX // copine family member IX // copine family member IX // copine family member IX // copine family member IX // copine family member …		1	1	coding	6
Cpox	coproporphyrinogen oxidase // coproporphyrinogen oxidase // coproporphyrinogen oxidase // coproporphyrinogen oxidase // coproporphyrinogen oxidase // coproporphyrinogen oxidase		5	4	coding	6
Creg2	cellular repressor of E1A-stimulated genes 2 // cellular repressor of E1A-stimulated genes 2 // cellular repressor of E1A-stimulated genes 2 // cellular repressor of E1A-stimulated genes 2 // cellular repressor of E1A-stimulated genes 2 // cellular repressor of E1A-stimulated genes 2		3	3	coding	6
Crip1	cysteine-rich protein 1 (intestinal) // cysteine-rich protein 1 (intestinal) // cysteine-rich protein 1 (intestinal)		1	1	coding	78
Crmp1	collapsin response mediator protein 1 // collapsin response mediator protein 1 // collapsin response mediator protein 1 // collapsin response mediator protein 1 // collapsin response mediator protein 1 // collapsin response mediator protein 1		2	2	coding	12
Crtac1	cartilage acidic protein 1 // cartilage acidic protein 1 // cartilage acidic protein 1		3	3	coding	12
Csdc2	cold shock domain containing C2, RNA binding // cold shock domain containing C2, RNA binding // cold shock domain containing C2, RNA binding // cold shock domain containing C2, RNA binding // cold shock domain containing C2, RNA binding // cold shock domain containing C2, RNA binding // cold shock domain containing C2, RNA binding // cold shock domain containing C2, RNA binding // cold shock doma…		2	2	coding	12
Csf2rb	colony stimulating factor 2 receptor, beta, low-affinity (granulocyte-macrophage) // colony stimulating factor 2 receptor, beta, low-affinity (granulocyte-macrophage) // colony stimulating factor 2 receptor, beta 2, low-affinity (granulocyte-macrophage) // colony stimulating factor 2 receptor, beta 2, low-affinity (granulocyte-macrophage) // colony stimulating factor 2 receptor, beta, low-affinit…		2	2	coding	78
Csf2rb2	colony stimulating factor 2 receptor, beta 2, low-affinity (granulocyte-macrophage) // colony stimulating factor 2 receptor, beta 2, low-affinity (granulocyte-macrophage) // colony stimulating factor 2 receptor, beta, low-affinity (granulocyte-macrophage) // colony stimulating factor 2 receptor, beta, low-affinity (granulocyte-macrophage) // colony stimulating factor 2 receptor, beta 2, low-affin…		4	3	coding	78
Cstb	cystatin B // cystatin B // cystatin B // cystatin B // cystatin B // cystatin B		4	3	coding	75
Ctsc	cathepsin C // cathepsin C // cathepsin C // cathepsin C // cathepsin C // cathepsin C // cathepsin C // cathepsin C // cathepsin C // cathepsin C // cathepsin C		2	2	coding	76
Ctsl	cathepsin L // cathepsin L // cathepsin L // cathepsin L // cathepsin L // cathepsin L // cathepsin L		1	1	coding	78
Cx3cl1	chemokine (C-X3-C motif) ligand 1 // chemokine (C-X3-C motif) ligand 1 // chemokine (C-X3-C motif) ligand 1 // chemokine (C-X3-C motif) ligand 1 // chemokine (C-X3-C motif) ligand 1 // chemokine (C-X3-C motif) ligand 1 // chemokine (C-X3-C motif) ligand 1 // chemokine (C-X3-C motif) ligand 1		4	3	coding	6
Cxxc4	CXXC finger 4 // CXXC finger 4 // CXXC finger 4 // CXXC finger 4		4	3	coding	12
Cyb561	cytochrome b-561 // cytochrome b-561 // cytochrome b-561 // cytochrome b-561 // cytochrome b-561 // cytochrome b-561 // cytochrome b-561 // cytochrome b-561 // cytochrome b-561		2	2	coding	30
Cyba	cytochrome b-245, alpha polypeptide // cytochrome b-245, alpha polypeptide // cytochrome b-245, alpha polypeptide // cytochrome b-245, alpha polypeptide // cytochrome b-245, alpha polypeptide // cytochrome b-245, alpha polypeptide // cytochrome b-245, alpha polypeptide // cytochrome b-245, alpha polypeptide		2	2	coding	78
Cyfip2	cytoplasmic FMR1 interacting protein 2 // cytoplasmic FMR1 interacting protein 2 // cytoplasmic FMR1 interacting protein 2 // cytoplasmic FMR1 interacting protein 2 // cytoplasmic FMR1 interacting protein 2 // cytoplasmic FMR1 interacting protein 2 // cytoplasmic FMR1 interacting protein 2 // cytoplasmic FMR1 interacting protein 2 // cytoplasmic FMR1 interacting protein 2 // cytoplasmic FMR1 inte…		4	4	coding	3
Cyp46a1	cytochrome P450, family 46, subfamily a, polypeptide 1 // cytochrome P450, family 46, subfamily a, polypeptide 1 // cytochrome P450, family 46, subfamily a, polypeptide 1 // cytochrome P450, family 46, subfamily a, polypeptide 1 // cytochrome P450, family 46, subfamily a, polypeptide 1 // cytochrome P450, family 46, subfamily a, polypeptide 1		4	4	coding	12
Cyp51	cytochrome P450, family 51 // cytochrome P450, family 51 // cytochrome P450, family 51		2	2	coding	30
Cyth4	cytohesin 4 // cytohesin 4 // cytohesin 4 // cytohesin 4 // cytohesin 4		1	1	coding	78
Cytip	cytohesin 1 interacting protein // cytohesin 1 interacting protein // cytohesin 1 interacting protein // cytohesin 1 interacting protein // cytohesin 1 interacting protein // cytohesin 1 interacting protein		1	1	coding	78
D3Bwg0562e	DNA segment, Chr 3, Brigham & Women's Genetics 0562 expressed // DNA segment, Chr 3, Brigham & Women's Genetics 0562 expressed // DNA segment, Chr 3, Brigham & Women's Genetics 0562 expressed // DNA segment, Chr 3, Brigham & Women's Genetics 0562 expressed // DNA segment, Chr 3, Brigham & Women's Genetics 0562 expressed // DNA segment, Chr 3, Brigham & Women's Genetics 0562 expressed // DNA segme…		1	1	coding	3
D930014E17Rik	RIKEN cDNA D930014E17 gene // RIKEN cDNA D930014E17 gene // RIKEN cDNA D930014E17 gene // RIKEN cDNA D930014E17 gene		1	1	coding	78
Dab1	disabled 1 // disabled 1 // disabled 1 // disabled 1 // disabled 1 // disabled 1		2	2	coding	6
Dap	death-associated protein // death-associated protein // death-associated protein		3	2	coding	78
Dbc1	deleted in bladder cancer 1 (human) // deleted in bladder cancer 1 (human) // deleted in bladder cancer 1 (human) // deleted in bladder cancer 1 (human)		6	5	coding	6
Dcaf12l1	DDB1 and CUL4 associated factor 12-like 1 // DDB1 and CUL4 associated factor 12-like 1 // DDB1 and CUL4 associated factor 12-like 1 // DDB1 and CUL4 associated factor 12-like 1 // DDB1 and CUL4 associated factor 12-like 1 // DDB1 and CUL4 associated factor 12-like 1 // DDB1 and CUL4 associated factor 12-like 1 // DDB1 and CUL4 associated factor 12-like 1 // DDB1 and CUL4 associated factor 12-like…		1	1	coding	12
Dclk2	doublecortin-like kinase 2 // doublecortin-like kinase 2 // doublecortin-like kinase 2 // doublecortin-like kinase 2 // doublecortin-like kinase 2 // doublecortin-like kinase 2 // doublecortin-like kinase 2 // doublecortin-like kinase 2 // doublecortin-like kinase 2 // doublecortin-like kinase 2 // doublecortin-like kinase 2		3	2	coding	12
Dclk3	doublecortin-like kinase 3 // doublecortin-like kinase 3 // doublecortin-like kinase 3 // doublecortin-like kinase 3		2	1	coding	12
Dcun1d4	DCN1, defective in cullin neddylation 1, domain containing 4 (S. cerevisiae) // DCN1, defective in cullin neddylation 1, domain containing 4 (S. cerevisiae) // DCN1, defective in cullin neddylation 1, domain containing 4 (S. cerevisiae) // DCN1, defective in cullin neddylation 1, domain containing 4 (S. cerevisiae) // DCN1, defective in cullin neddylation 1, domain containing 4 (S. cerevisiae) //…		4	3	coding	12
Ddx25	DEAD (Asp-Glu-Ala-Asp) box polypeptide 25 // DEAD (Asp-Glu-Ala-Asp) box polypeptide 25 // DEAD (Asp-Glu-Ala-Asp) box polypeptide 25 // DEAD (Asp-Glu-Ala-Asp) box polypeptide 25 // DEAD (Asp-Glu-Ala-Asp) box polypeptide 25 // DEAD (Asp-Glu-Ala-Asp) box polypeptide 25		4	4	coding	12
Dennd5b	DENN/MADD domain containing 5B // DENN/MADD domain containing 5B // DENN/MADD domain containing 5B // DENN/MADD domain containing 5B		3	3	coding	12
Dgkb	diacylglycerol kinase, beta // diacylglycerol kinase, beta // diacylglycerol kinase, beta // diacylglycerol kinase, beta // diacylglycerol kinase, beta // diacylglycerol kinase, beta // diacylglycerol kinase, beta		2	2	coding	6
Dgke	diacylglycerol kinase, epsilon // diacylglycerol kinase, epsilon // diacylglycerol kinase, epsilon // diacylglycerol kinase, epsilon // diacylglycerol kinase, epsilon // diacylglycerol kinase, epsilon // diacylglycerol kinase, epsilon // diacylglycerol kinase, epsilon // diacylglycerol kinase, epsilon // diacylglycerol kinase, epsilon		2	2	coding	3
Dgkg	diacylglycerol kinase, gamma // diacylglycerol kinase, gamma // diacylglycerol kinase, gamma // diacylglycerol kinase, gamma		7	6	coding	12
Dgkk	diacylglycerol kinase kappa // diacylglycerol kinase kappa // diacylglycerol kinase kappa // diacylglycerol kinase kappa // diacylglycerol kinase kappa // diacylglycerol kinase kappa // diacylglycerol kinase kappa // diacylglycerol kinase kappa		3	3	coding	12
Dhcr24	24-dehydrocholesterol reductase // 24-dehydrocholesterol reductase // 24-dehydrocholesterol reductase // 24-dehydrocholesterol reductase // 24-dehydrocholesterol reductase // 24-dehydrocholesterol reductase		1	1	coding	30
Diras1	DIRAS family, GTP-binding RAS-like 1 // DIRAS family, GTP-binding RAS-like 1 // DIRAS family, GTP-binding RAS-like 1 // DIRAS family, GTP-binding RAS-like 1 // DIRAS family, GTP-binding RAS-like 1 // DIRAS family, GTP-binding RAS-like 1 // DIRAS family, GTP-binding RAS-like 1		1	1	coding	12
Diras2	DIRAS family, GTP-binding RAS-like 2 // DIRAS family, GTP-binding RAS-like 2 // DIRAS family, GTP-binding RAS-like 2		1	1	coding	12
Dlg4	discs, large homolog 4 (Drosophila) // discs, large homolog 4 (Drosophila) // discs, large homolog 4 (Drosophila) // discs, large homolog 4 (Drosophila) // discs, large homolog 4 (Drosophila) // discs, large homolog 4 (Drosophila) // discs, large homolog 4 (Drosophila) // discs, large homolog 4 (Drosophila) // discs, large homolog 4 (Drosophila) // discs, large homolog 4 (Drosophila) // discs, la…		1	1	coding	3
Dlgap1	discs, large (Drosophila) homolog-associated protein 1 // discs, large (Drosophila) homolog-associated protein 1 // discs, large (Drosophila) homolog-associated protein 1 // discs, large (Drosophila) homolog-associated protein 1 // discs, large (Drosophila) homolog-associated protein 1 // discs, large (Drosophila) homolog-associated protein 1 // discs, large (Drosophila) homolog-associated protei…		6	6	coding	12
Dlgap2	discs, large (Drosophila) homolog-associated protein 2 // discs, large (Drosophila) homolog-associated protein 2 // discs, large (Drosophila) homolog-associated protein 2 // discs, large (Drosophila) homolog-associated protein 2 // discs, large (Drosophila) homolog-associated protein 2 // discs, large (Drosophila) homolog-associated protein 2 // discs, large (Drosophila) homolog-associated protei…		5	5	coding	12
Dlgap3	discs, large (Drosophila) homolog-associated protein 3 // discs, large (Drosophila) homolog-associated protein 3 // discs, large (Drosophila) homolog-associated protein 3 // discs, large (Drosophila) homolog-associated protein 3		1	1	coding	12
Dlk1	delta-like 1 homolog (Drosophila) // delta-like 1 homolog (Drosophila) // delta-like 1 homolog (Drosophila) // delta-like 1 homolog (Drosophila) // delta-like 1 homolog (Drosophila) // delta-like 1 homolog (Drosophila) // delta-like 1 homolog (Drosophila) // delta-like 1 homolog (Drosophila) // delta-like 1 homolog (Drosophila) // delta-like 1 homolog (Drosophila) // delta-like 1 homolog (Drosoph…		2	2	coding	3
Dnajc27	DnaJ (Hsp40) homolog, subfamily C, member 27 // DnaJ (Hsp40) homolog, subfamily C, member 27 // DnaJ (Hsp40) homolog, subfamily C, member 27 // DnaJ (Hsp40) homolog, subfamily C, member 27 // DnaJ (Hsp40) homolog, subfamily C, member 27 // DnaJ (Hsp40) homolog, subfamily C, member 27 // DnaJ (Hsp40) homolog, subfamily C, member 27 // DnaJ (Hsp40) homolog, subfamily C, member 27		1	1	coding	3
Dnajc6	DnaJ (Hsp40) homolog, subfamily C, member 6 // DnaJ (Hsp40) homolog, subfamily C, member 6 // DnaJ (Hsp40) homolog, subfamily C, member 6 // DnaJ (Hsp40) homolog, subfamily C, member 6 // DnaJ (Hsp40) homolog, subfamily C, member 6 // DnaJ (Hsp40) homolog, subfamily C, member 6 // DnaJ (Hsp40) homolog, subfamily C, member 6 // DnaJ (Hsp40) homolog, subfamily C, member 6 // DnaJ (Hsp40) homolog, s…		2	2	coding	12
Dner	delta/notch-like EGF-related receptor // delta/notch-like EGF-related receptor // delta/notch-like EGF-related receptor		3	3	coding	12
Dnm3	dynamin 3 // dynamin 3 // dynamin 3 // dynamin 3 // dynamin 3		4	3	coding	12
Dock3	dedicator of cyto-kinesis 3 // dedicator of cyto-kinesis 3 // dedicator of cyto-kinesis 3 // dedicator of cyto-kinesis 3		2	2	coding	12
Dpp10	dipeptidylpeptidase 10 // dipeptidylpeptidase 10 // dipeptidylpeptidase 10 // dipeptidylpeptidase 10 // dipeptidylpeptidase 10		1	1	coding	12
Dpp6	dipeptidylpeptidase 6 // dipeptidylpeptidase 6 // dipeptidylpeptidase 6 // dipeptidylpeptidase 6 // dipeptidylpeptidase 6 // dipeptidylpeptidase 6 // dipeptidylpeptidase 6 // dipeptidylpeptidase 6 // dipeptidylpeptidase 6		1	1	coding	12
Dpysl5	dihydropyrimidinase-like 5 // dihydropyrimidinase-like 5 // dihydropyrimidinase-like 5 // dihydropyrimidinase-like 5		1	1	coding	12
Drd2	dopamine receptor D2 // dopamine receptor D2 // dopamine receptor D2 // dopamine receptor D2		1	1	coding	12
Dscam	Down syndrome cell adhesion molecule // Down syndrome cell adhesion molecule // Down syndrome cell adhesion molecule		2	2	coding	6
Dtx1	deltex 1 homolog (Drosophila) // deltex 1 homolog (Drosophila) // deltex 1 homolog (Drosophila) // deltex 1 homolog (Drosophila) // deltex 1 homolog (Drosophila) // deltex 1 homolog (Drosophila) // deltex 1 homolog (Drosophila) // deltex 1 homolog (Drosophila)		2	2	coding	12
Dusp15	dual specificity phosphatase-like 15 // dual specificity phosphatase-like 15 // dual specificity phosphatase-like 15 // dual specificity phosphatase-like 15 // dual specificity phosphatase-like 15 // dual specificity phosphatase-like 15 // dual specificity phosphatase-like 15 // dual specificity phosphatase-like 15 // dual specificity phosphatase-like 15 // dual specificity phosphatase-like 15 //…		3	2	coding	6
Dusp8	dual specificity phosphatase 8 // dual specificity phosphatase 8 // dual specificity phosphatase 8 // dual specificity phosphatase 8 // dual specificity phosphatase 8 // dual specificity phosphatase 8 // dual specificity phosphatase 8 // dual specificity phosphatase 8 // dual specificity phosphatase 8		3	3	coding	12
Dzip1	DAZ interacting protein 1 // DAZ interacting protein 1 // DAZ interacting protein 1 // DAZ interacting protein 1 // DAZ interacting protein 1 // DAZ interacting protein 1 // DAZ interacting protein 1 // DAZ interacting protein 1 // DAZ interacting protein 1 // DAZ interacting protein 1		5	3	coding	6
E130309F12Rik	RIKEN cDNA E130309F12 gene // RIKEN cDNA E130309F12 gene // RIKEN cDNA E130309F12 gene // RIKEN cDNA E130309F12 gene		2	2	coding	6
Ebf3	early B cell factor 3 // early B cell factor 3 // early B cell factor 3 // early B cell factor 3 // early B cell factor 3 // early B cell factor 3 // early B cell factor 3		5	4	coding	12
Ecm1	extracellular matrix protein 1 // extracellular matrix protein 1 // extracellular matrix protein 1 // extracellular matrix protein 1 // extracellular matrix protein 1 // extracellular matrix protein 1 // extracellular matrix protein 1 // extracellular matrix protein 1 // extracellular matrix protein 1 // extracellular matrix protein 1 // extracellular matrix protein 1		2	2	coding	78
Edem1	ER degradation enhancer, mannosidase alpha-like 1 // ER degradation enhancer, mannosidase alpha-like 1 // ER degradation enhancer, mannosidase alpha-like 1 // ER degradation enhancer, mannosidase alpha-like 1 // ER degradation enhancer, mannosidase alpha-like 1 // ER degradation enhancer, mannosidase alpha-like 1 // ER degradation enhancer, mannosidase alpha-like 1 // ER degradation enhancer, man…		1	1	coding	78
Eef1a2	eukaryotic translation elongation factor 1 alpha 2 // eukaryotic translation elongation factor 1 alpha 2 // eukaryotic translation elongation factor 1 alpha 2 // eukaryotic translation elongation factor 1 alpha 2 // eukaryotic translation elongation factor 1 alpha 2 // eukaryotic translation elongation factor 1 alpha 2 // eukaryotic translation elongation factor 1 alpha 2 // eukaryotic translatio…		1	1	coding	12
Efhd1	EF hand domain containing 1 // EF hand domain containing 1 // EF hand domain containing 1 // EF hand domain containing 1		4	2	coding	12
Efnb3	ephrin B3 // ephrin B3 // ephrin B3 // ephrin B3 // ephrin B3 // ephrin B3		4	2	coding	12
Ehd4	EH-domain containing 4 // EH-domain containing 4 // EH-domain containing 4 // EH-domain containing 4 // EH-domain containing 4		5	5	coding	75
Eif2ak2	eukaryotic translation initiation factor 2-alpha kinase 2 // eukaryotic translation initiation factor 2-alpha kinase 2 // eukaryotic translation elongation factor 1 alpha 1 pseudogene // eukaryotic translation initiation factor 2-alpha kinase 2 // eukaryotic translation initiation factor 2-alpha kinase 2		1	1	coding	67
Eif5a2	eukaryotic translation initiation factor 5A2 // eukaryotic translation initiation factor 5A2 // eukaryotic translation initiation factor 5A2 // eukaryotic translation initiation factor 5A2 // eukaryotic translation initiation factor 5A2 // eukaryotic translation initiation factor 5A2		1	1	coding	3
Elavl2	ELAV (embryonic lethal, abnormal vision, Drosophila)-like 2 (Hu antigen B) // ELAV (embryonic lethal, abnormal vision, Drosophila)-like 2 (Hu antigen B) // ELAV (embryonic lethal, abnormal vision, Drosophila)-like 2 (Hu antigen B) // ELAV (embryonic lethal, abnormal vision, Drosophila)-like 2 (Hu antigen B) // ELAV (embryonic lethal, abnormal vision, Drosophila)-like 2 (Hu antigen B) // ELAV (emb…		3	3	coding	12
Elavl4	ELAV (embryonic lethal, abnormal vision, Drosophila)-like 4 (Hu antigen D) // ELAV (embryonic lethal, abnormal vision, Drosophila)-like 4 (Hu antigen D) // ELAV (embryonic lethal, abnormal vision, Drosophila)-like 4 (Hu antigen D) // ELAV (embryonic lethal, abnormal vision, Drosophila)-like 4 (Hu antigen D) // ELAV (embryonic lethal, abnormal vision, Drosophila)-like 4 (Hu antigen D) // ELAV (emb…		6	5	coding	12
Elf4	E74-like factor 4 (ets domain transcription factor) // E74-like factor 4 (ets domain transcription factor) // E74-like factor 4 (ets domain transcription factor) // E74-like factor 4 (ets domain transcription factor) // E74-like factor 4 (ets domain transcription factor)		1	1	coding	78
Elk3	ELK3, member of ETS oncogene family // ELK3, member of ETS oncogene family // ELK3, member of ETS oncogene family // ELK3, member of ETS oncogene family // ELK3, member of ETS oncogene family		1	1	coding	78
Elmod1	ELMO domain containing 1 // ELMO domain containing 1 // ELMO domain containing 1 // ELMO domain containing 1		3	3	coding	12
Elovl2	elongation of very long chain fatty acids (FEN1/Elo2, SUR4/Elo3, yeast)-like 2 // elongation of very long chain fatty acids (FEN1/Elo2, SUR4/Elo3, yeast)-like 2 // elongation of very long chain fatty acids (FEN1/Elo2, SUR4/Elo3, yeast)-like 2		6	5	coding	12
Elovl6	ELOVL family member 6, elongation of long chain fatty acids (yeast) // ELOVL family member 6, elongation of long chain fatty acids (yeast) // ELOVL family member 6, elongation of long chain fatty acids (yeast)		5	3	coding	3
Emp3	epithelial membrane protein 3 // epithelial membrane protein 3 // epithelial membrane protein 3 // epithelial membrane protein 3 // epithelial membrane protein 3 // epithelial membrane protein 3 // epithelial membrane protein 3 // epithelial membrane protein 3 // epithelial membrane protein 3 // epithelial membrane protein 3		2	2	coding	76
Emr1	EGF-like module containing, mucin-like, hormone receptor-like sequence 1 // EGF-like module containing, mucin-like, hormone receptor-like sequence 1 // EGF-like module containing, mucin-like, hormone receptor-like sequence 1 // EGF-like module containing, mucin-like, hormone receptor-like sequence 1 // EGF-like module containing, mucin-like, hormone receptor-like sequence 1 // EGF-like module con…		2	2	coding	78
Enah	enabled homolog (Drosophila) // enabled homolog (Drosophila) // enabled homolog (Drosophila) // enabled homolog (Drosophila) // enabled homolog (Drosophila) // enabled homolog (Drosophila) // enabled homolog (Drosophila) // enabled homolog (Drosophila) // enabled homolog (Drosophila)		2	2	coding	12
Eno2	enolase 2, gamma neuronal // enolase 2, gamma neuronal // enolase 2, gamma neuronal // enolase 2, gamma neuronal // enolase 2, gamma neuronal // enolase 2, gamma neuronal // enolase 2, gamma neuronal // enolase 2, gamma neuronal // enolase 2, gamma neuronal // enolase 2, gamma neuronal // enolase 2, gamma neuronal // enolase 2, gamma neuronal // enolase 2, gamma neuronal // enolase 2, gamma neuro…		1	1	coding	30
Enpp2	ectonucleotide pyrophosphatase/phosphodiesterase 2 // ectonucleotide pyrophosphatase/phosphodiesterase 2 // ectonucleotide pyrophosphatase/phosphodiesterase 2 // ectonucleotide pyrophosphatase/phosphodiesterase 2 // ectonucleotide pyrophosphatase/phosphodiesterase 2 // ectonucleotide pyrophosphatase/phosphodiesterase 2 // ectonucleotide pyrophosphatase/phosphodiesterase 2		5	3	coding	6
Enpp5	ectonucleotide pyrophosphatase/phosphodiesterase 5 // ectonucleotide pyrophosphatase/phosphodiesterase 5 // ectonucleotide pyrophosphatase/phosphodiesterase 5 // ectonucleotide pyrophosphatase/phosphodiesterase 5 // ectonucleotide pyrophosphatase/phosphodiesterase 5 // ectonucleotide pyrophosphatase/phosphodiesterase 5 // ectonucleotide pyrophosphatase/phosphodiesterase 5 // ectonucleotide pyroph…		6	4	coding	12
ENSMUST00000085979	cdna:known chromosome:GRCm38:9:44274452:44279838:-1 gene:ENSMUSG00000032131 gene_biotype:protein_coding transcript_biotype:retained_intron	ensembl_cDNAncRNA	2	1	non-coding	6
ENSMUST00000110989	cdna:known chromosome:GRCm38:10:19591958:19597851:1 gene:ENSMUSG00000020009 gene_biotype:protein_coding transcript_biotype:retained_intron	ensembl_cDNAncRNA	9	3	non-coding	78
ENSMUST00000118146	cdna:pseudogene chromosome:GRCm38:11:90516777:90517316:-1 gene:ENSMUSG00000083268 gene_biotype:pseudogene transcript_biotype:processed_pseudogene	ensembl_cDNAncRNA	17	3	non-coding	66
ENSMUST00000123548	cdna:known chromosome:GRCm38:4:148947492:148948914:-1 gene:ENSMUSG00000086606 gene_biotype:antisense transcript_biotype:antisense	ensembl_cDNAncRNA	4	2	non-coding	12
ENSMUST00000124186	cdna:known chromosome:GRCm38:9:96731556:96732669:-1 gene:ENSMUSG00000040433 gene_biotype:protein_coding transcript_biotype:retained_intron	ensembl_cDNAncRNA	5	2	non-coding	6
ENSMUST00000125559	cdna:known chromosome:GRCm38:16:30518111:30550842:-1 gene:ENSMUSG00000022537 gene_biotype:protein_coding transcript_biotype:retained_intron	ensembl_cDNAncRNA	6	2	non-coding	14
ENSMUST00000125782	cdna:known chromosome:GRCm38:7:3630059:3637057:1 gene:ENSMUSG00000008373 gene_biotype:protein_coding transcript_biotype:retained_intron	ensembl_cDNAncRNA	21	4	non-coding	12
ENSMUST00000126588	cdna:known chromosome:GRCm38:2:30892488:30897469:-1 gene:ENSMUSG00000050737 gene_biotype:protein_coding transcript_biotype:processed_transcript	ensembl_cDNAncRNA	2	2	non-coding	75
ENSMUST00000126791	cdna:known chromosome:GRCm38:5:24324490:24325789:-1 gene:ENSMUSG00000038319 gene_biotype:protein_coding transcript_biotype:processed_transcript	ensembl_cDNAncRNA	9	4	non-coding	12
ENSMUST00000127164	cdna:known chromosome:GRCm38:7:44350762:44352057:1 gene:ENSMUSG00000038738 gene_biotype:protein_coding transcript_biotype:retained_intron	ensembl_cDNAncRNA	4	3	non-coding	12
ENSMUST00000128109	cdna:known chromosome:GRCm38:6:4688612:4747080:-1 gene:ENSMUSG00000004631 gene_biotype:protein_coding transcript_biotype:processed_transcript	ensembl_cDNAncRNA	2	2	non-coding	6
ENSMUST00000128702	cdna:known chromosome:GRCm38:5:115907470:115925600:1 gene:ENSMUSG00000029516 gene_biotype:protein_coding transcript_biotype:retained_intron	ensembl_cDNAncRNA	17	2	non-coding	12
ENSMUST00000128849	cdna:known chromosome:GRCm38:6:15727799:15770349:1 gene:ENSMUSG00000041390 gene_biotype:protein_coding transcript_biotype:processed_transcript	ensembl_cDNAncRNA	3	2	non-coding	78
ENSMUST00000129074	cdna:known chromosome:GRCm38:11:8451070:8468675:-1 gene:ENSMUSG00000020422 gene_biotype:protein_coding transcript_biotype:processed_transcript	ensembl_cDNAncRNA	8	2	non-coding	78
ENSMUST00000129688	cdna:known chromosome:GRCm38:18:37896157:37897942:-1 gene:ENSMUSG00000024456 gene_biotype:protein_coding transcript_biotype:retained_intron	ensembl_cDNAncRNA	11	3	non-coding	69
ENSMUST00000131086	cdna:putative chromosome:GRCm38:14:33250390:33271983:1 gene:ENSMUSG00000063506 gene_biotype:protein_coding transcript_biotype:processed_transcript	ensembl_cDNAncRNA	20	3	non-coding	12
ENSMUST00000131250	cdna:known chromosome:GRCm38:16:4616464:4616988:-1 gene:ENSMUSG00000014301 gene_biotype:protein_coding transcript_biotype:retained_intron	ensembl_cDNAncRNA	1	1	non-coding	75
ENSMUST00000131602	cdna:known chromosome:GRCm38:7:19791855:19796805:-1 gene:ENSMUSG00000040525 gene_biotype:protein_coding transcript_biotype:retained_intron	ensembl_cDNAncRNA	4	3	non-coding	75
ENSMUST00000133187	cdna:known chromosome:GRCm38:13:55075136:55100299:-1 gene:ENSMUSG00000025878 gene_biotype:protein_coding transcript_biotype:retained_intron	ensembl_cDNAncRNA	6	2	non-coding	75
ENSMUST00000134248	cdna:known chromosome:GRCm38:4:87072442:87230423:-1 gene:ENSMUSG00000037996 gene_biotype:protein_coding transcript_biotype:processed_transcript	ensembl_cDNAncRNA	12	3	non-coding	3
ENSMUST00000135195	cdna:known chromosome:GRCm38:10:21996591:21998240:1 gene:ENSMUSG00000019970 gene_biotype:protein_coding transcript_biotype:retained_intron	ensembl_cDNAncRNA	7	3	non-coding	75
ENSMUST00000135488	cdna:known chromosome:GRCm38:2:37634928:37703348:-1 gene:ENSMUSG00000026915 gene_biotype:protein_coding transcript_biotype:processed_transcript	ensembl_cDNAncRNA	4	3	non-coding	6
ENSMUST00000135559	cdna:known chromosome:GRCm38:6:125146026:125161776:1 gene:ENSMUSG00000038271 gene_biotype:protein_coding transcript_biotype:retained_intron	ensembl_cDNAncRNA	2	2	non-coding	12
ENSMUST00000135943	cdna:known chromosome:GRCm38:8:64724981:64733548:-1 gene:ENSMUSG00000031604 gene_biotype:protein_coding transcript_biotype:retained_intron	ensembl_cDNAncRNA	4	3	non-coding	12
ENSMUST00000136119	cdna:known chromosome:GRCm38:8:45658784:45742419:1 gene:ENSMUSG00000031626 gene_biotype:protein_coding transcript_biotype:retained_intron	ensembl_cDNAncRNA	2	1	non-coding	6
ENSMUST00000136736	cdna:known chromosome:GRCm38:7:141339004:141355792:1 gene:ENSMUSG00000025504 gene_biotype:protein_coding transcript_biotype:retained_intron	ensembl_cDNAncRNA	8	4	non-coding	12
ENSMUST00000136843	cdna:known chromosome:GRCm38:4:129593329:129595768:-1 gene:ENSMUSG00000028798 gene_biotype:protein_coding transcript_biotype:retained_intron	ensembl_cDNAncRNA	1	1	non-coding	69
ENSMUST00000137153	ensembl_havana_lincrna:lincRNA chromosome:GRCm38:X:61116386:61120651:1 gene:ENSMUSG00000071753 gene_biotype:lincRNA transcript_biotype:processed_transcript	ensembl_ncRNA	12	3	non-coding	3
ENSMUST00000137153	ensembl_havana_lincrna:lincRNA chromosome:GRCm38:X:61116386:61120651:1 gene:ENSMUSG00000071753 gene_biotype:lincRNA transcript_biotype:processed_transcript	ensembl_ncRNA	12	3	non-coding	12
ENSMUST00000137657	cdna:known chromosome:GRCm38:15:91808238:91816026:1 gene:ENSMUSG00000036273 gene_biotype:protein_coding transcript_biotype:retained_intron	ensembl_cDNAncRNA	11	3	non-coding	78
ENSMUST00000138093	cdna:known chromosome:GRCm38:11:65719539:65745838:-1 gene:ENSMUSG00000033352 gene_biotype:protein_coding transcript_biotype:processed_transcript	ensembl_cDNAncRNA	10	3	non-coding	12
ENSMUST00000139975	cdna:known chromosome:GRCm38:2:113827340:113828762:-1 gene:ENSMUSG00000023236 gene_biotype:protein_coding transcript_biotype:processed_transcript	ensembl_cDNAncRNA	3	1	non-coding	30
ENSMUST00000140047	cdna:known chromosome:GRCm38:7:138846860:138869802:1 gene:ENSMUSG00000041769 gene_biotype:protein_coding transcript_biotype:processed_transcript	ensembl_cDNAncRNA	3	2	non-coding	12
ENSMUST00000140605	cdna:known chromosome:GRCm38:4:127054288:127057573:-1 gene:ENSMUSG00000043872 gene_biotype:protein_coding transcript_biotype:processed_transcript	ensembl_cDNAncRNA	4	3	non-coding	12
ENSMUST00000141677	cdna:known chromosome:GRCm38:X:152619123:152644110:-1 gene:ENSMUSG00000045180 gene_biotype:protein_coding transcript_biotype:processed_transcript	ensembl_cDNAncRNA	2	2	non-coding	12
ENSMUST00000145363	cdna:known chromosome:GRCm38:5:115925641:116006794:1 gene:ENSMUSG00000029516 gene_biotype:protein_coding transcript_biotype:processed_transcript	ensembl_cDNAncRNA	52	6	non-coding	12
ENSMUST00000146204	cdna:known chromosome:GRCm38:2:165852034:165879902:-1 gene:ENSMUSG00000039671 gene_biotype:protein_coding transcript_biotype:processed_transcript	ensembl_cDNAncRNA	5	3	non-coding	6
ENSMUST00000147162	cdna:known chromosome:GRCm38:10:80642623:80644632:-1 gene:ENSMUSG00000003344 gene_biotype:protein_coding transcript_biotype:retained_intron	ensembl_cDNAncRNA	7	3	non-coding	75
ENSMUST00000147410	cdna:known chromosome:GRCm38:11:96346829:96354691:-1 gene:ENSMUSG00000084844 gene_biotype:antisense transcript_biotype:antisense	ensembl_cDNAncRNA	7	3	non-coding	3
ENSMUST00000148824	cdna:known chromosome:GRCm38:12:103434285:103436973:1 gene:ENSMUSG00000064215 gene_biotype:protein_coding transcript_biotype:retained_intron	ensembl_cDNAncRNA	4	2	non-coding	75
ENSMUST00000149165	cdna:known chromosome:GRCm38:2:104207666:104257984:-1 gene:ENSMUSG00000068373 gene_biotype:protein_coding transcript_biotype:retained_intron	ensembl_cDNAncRNA	30	6	non-coding	6
ENSMUST00000149165	cdna:known chromosome:GRCm38:2:104207666:104257984:-1 gene:ENSMUSG00000068373 gene_biotype:protein_coding transcript_biotype:retained_intron	ensembl_cDNAncRNA	30	6	non-coding	12
ENSMUST00000150347	cdna:known chromosome:GRCm38:10:80138632:80142400:1 gene:ENSMUSG00000003072 gene_biotype:protein_coding transcript_biotype:processed_transcript	ensembl_cDNAncRNA	5	2	non-coding	12
ENSMUST00000153025	cdna:known chromosome:GRCm38:5:35848776:35869192:1 gene:ENSMUSG00000029095 gene_biotype:protein_coding transcript_biotype:retained_intron	ensembl_cDNAncRNA	10	2	non-coding	12
ENSMUST00000154476	cdna:known chromosome:GRCm38:9:66526661:66530402:-1 gene:ENSMUSG00000032376 gene_biotype:protein_coding transcript_biotype:retained_intron	ensembl_cDNAncRNA	3	3	non-coding	75
ENSMUST00000154771	cdna:known chromosome:GRCm38:X:100605555:100613841:1 gene:ENSMUSG00000060890 gene_biotype:protein_coding transcript_biotype:retained_intron	ensembl_cDNAncRNA	3	3	non-coding	6
ENSMUST00000154999	cdna:known chromosome:GRCm38:4:86648386:86658683:-1 gene:ENSMUSG00000028494 gene_biotype:protein_coding transcript_biotype:processed_transcript	ensembl_cDNAncRNA	19	3	non-coding	78
ENSMUST00000155361	cdna:known chromosome:GRCm38:4:87175785:87230467:-1 gene:ENSMUSG00000037996 gene_biotype:protein_coding transcript_biotype:processed_transcript	ensembl_cDNAncRNA	35	2	non-coding	30
ENSMUST00000155823	cdna:known chromosome:GRCm38:17:69969368:70081019:1 gene:ENSMUSG00000003279 gene_biotype:protein_coding transcript_biotype:retained_intron	ensembl_cDNAncRNA	18	3	non-coding	12
ENSMUST00000155925	cdna:known chromosome:GRCm38:7:51926436:51943767:1 gene:ENSMUSG00000030498 gene_biotype:protein_coding transcript_biotype:processed_transcript	ensembl_cDNAncRNA	8	2	non-coding	6
ENSMUST00000161765	cdna:known chromosome:GRCm38:10:79736123:79746573:-1 gene:ENSMUSG00000020329 gene_biotype:protein_coding transcript_biotype:retained_intron	ensembl_cDNAncRNA	2	1	non-coding	6
ENSMUST00000172703	havana:non_coding chromosome:GRCm38:3:34638504:34682619:1 gene:ENSMUSG00000090828 gene_biotype:non_coding transcript_biotype:non_coding	ensembl_ncRNA	26	4	non-coding	6
ENSMUST00000175979	cdna:known chromosome:GRCm38:10:25169090:25238717:-1 gene:ENSMUSG00000039166 gene_biotype:protein_coding transcript_biotype:processed_transcript	ensembl_cDNAncRNA	37	6	non-coding	12
ENSMUST00000176122	cdna:known chromosome:GRCm38:14:39009187:39472666:-1 gene:ENSMUSG00000041014 gene_biotype:protein_coding transcript_biotype:retained_intron	ensembl_cDNAncRNA	3	2	non-coding	6
ENSMUST00000177011	cdna:known chromosome:GRCm38:15:76733457:76818129:-1 gene:ENSMUSG00000033697 gene_biotype:protein_coding transcript_biotype:retained_intron	ensembl_cDNAncRNA	1	1	non-coding	12
Entpd3	ectonucleoside triphosphate diphosphohydrolase 3 // ectonucleoside triphosphate diphosphohydrolase 3 // ectonucleoside triphosphate diphosphohydrolase 3 // ectonucleoside triphosphate diphosphohydrolase 3 // ectonucleoside triphosphate diphosphohydrolase 3		3	3	coding	12
Epb4.1l1	erythrocyte protein band 4.1-like 1 // erythrocyte protein band 4.1-like 1 // erythrocyte protein band 4.1-like 1 // erythrocyte protein band 4.1-like 1 // erythrocyte protein band 4.1-like 1 // erythrocyte protein band 4.1-like 1 // erythrocyte protein band 4.1-like 1 // erythrocyte protein band 4.1-like 1 // erythrocyte protein band 4.1-like 1 // erythrocyte protein band 4.1-like 1 // erythrocy…		1	1	coding	30
Epb4.1l3	erythrocyte protein band 4.1-like 3 // erythrocyte protein band 4.1-like 3 // erythrocyte protein band 4.1-like 3 // erythrocyte protein band 4.1-like 3 // erythrocyte protein band 4.1-like 3 // erythrocyte protein band 4.1-like 3 // erythrocyte protein band 4.1-like 3 // erythrocyte protein band 4.1-like 3		3	3	coding	3
Epb4.9	erythrocyte protein band 4.9 // erythrocyte protein band 4.9 // erythrocyte protein band 4.9 // erythrocyte protein band 4.9 // erythrocyte protein band 4.9 // erythrocyte protein band 4.9 // erythrocyte protein band 4.9 // erythrocyte protein band 4.9 // erythrocyte protein band 4.9 // erythrocyte protein band 4.9 // erythrocyte protein band 4.9 // erythrocyte protein band 4.9 // erythrocyte pro…		3	3	coding	12
Epha5	Eph receptor A5 // Eph receptor A5 // Eph receptor A5 // Eph receptor A5 // Eph receptor A5 // Eph receptor A5 // Eph receptor A5 // Eph receptor A5 // Eph receptor A5 // Eph receptor A5 // Eph receptor A5 // Eph receptor A5		5	3	coding	6
Epha6	Eph receptor A6 // Eph receptor A6 // Eph receptor A6 // Eph receptor A6		1	1	coding	6
Ephb1	Eph receptor B1 // Eph receptor B1 // Eph receptor B1 // Eph receptor B1 // Eph receptor B1		2	2	coding	6
Epm2aip1	EPM2A (laforin) interacting protein 1 // EPM2A (laforin) interacting protein 1 // EPM2A (laforin) interacting protein 1 // EPM2A (laforin) interacting protein 1 // EPM2A (laforin) interacting protein 1		3	3	coding	6
Ermn	ermin, ERM-like protein // ermin, ERM-like protein // ermin, ERM-like protein // ermin, ERM-like protein // ermin, ERM-like protein // ermin, ERM-like protein		2	2	coding	12
Extl2	exostoses (multiple)-like 2 // exostoses (multiple)-like 2 // exostoses (multiple)-like 2 // exostoses (multiple)-like 2 // exostoses (multiple)-like 2 // exostoses (multiple)-like 2 // exostoses (multiple)-like 2 // exostoses (multiple)-like 2 // exostoses (multiple)-like 2 // exostoses (multiple)-like 2 // exostoses (multiple)-like 2 // exostoses (multiple)-like 2 // exostoses (multiple)-like 2		2	2	coding	6
F13a1	coagulation factor XIII, A1 subunit // coagulation factor XIII, A1 subunit // coagulation factor XIII, A1 subunit // coagulation factor XIII, A1 subunit // coagulation factor XIII, A1 subunit		2	2	coding	75
Faah	fatty acid amide hydrolase // fatty acid amide hydrolase // fatty acid amide hydrolase // fatty acid amide hydrolase // fatty acid amide hydrolase // fatty acid amide hydrolase // fatty acid amide hydrolase // fatty acid amide hydrolase // fatty acid amide hydrolase // fatty acid amide hydrolase // fatty acid amide hydrolase // fatty acid amide hydrolase // fatty acid amide hydrolase		6	4	coding	12
Faim2	Fas apoptotic inhibitory molecule 2 // Fas apoptotic inhibitory molecule 2 // Fas apoptotic inhibitory molecule 2 // Fas apoptotic inhibitory molecule 2 // Fas apoptotic inhibitory molecule 2 // Fas apoptotic inhibitory molecule 2 // Fas apoptotic inhibitory molecule 2 // Fas apoptotic inhibitory molecule 2		2	2	coding	30
Fam111a	family with sequence similarity 111, member A // family with sequence similarity 111, member A // family with sequence similarity 111, member A // family with sequence similarity 111, member A // family with sequence similarity 111, member A // family with sequence similarity 111, member A // family with sequence similarity 111, member A // family with sequence similarity 111, member A // family …		1	1	coding	75
Fam116b	family with sequence similarity 116, member B // family with sequence similarity 116, member B // family with sequence similarity 116, member B // family with sequence similarity 116, member B // family with sequence similarity 116, member B // family with sequence similarity 116, member B		5	4	coding	12
Fam120b	family with sequence similarity 120, member B // family with sequence similarity 120, member B // family with sequence similarity 120, member B // family with sequence similarity 120, member B		5	3	coding	6
Fam123c	family with sequence similarity 123, member C // family with sequence similarity 123, member C // family with sequence similarity 123, member C // family with sequence similarity 123, member C // family with sequence similarity 123, member C // family with sequence similarity 123, member C		8	6	coding	12
Fam126b	family with sequence similarity 126, member B // family with sequence similarity 126, member B // family with sequence similarity 126, member B // family with sequence similarity 126, member B // family with sequence similarity 126, member B // family with sequence similarity 126, member B		4	4	coding	6
Fam129b	family with sequence similarity 129, member B // family with sequence similarity 129, member B // family with sequence similarity 129, member B // family with sequence similarity 129, member B // family with sequence similarity 129, member B // family with sequence similarity 129, member B // family with sequence similarity 129, member B		1	1	coding	75
Fam135b	family with sequence similarity 135, member B // family with sequence similarity 135, member B // family with sequence similarity 135, member B		2	2	coding	12
Fam13a	family with sequence similarity 13, member A // family with sequence similarity 13, member A // family with sequence similarity 13, member A // family with sequence similarity 13, member A		3	3	coding	6
Fam163b	family with sequence similarity 163, member B // family with sequence similarity 163, member B // family with sequence similarity 163, member B		4	3	coding	12
Fam189a1	family with sequence similarity 189, member A1 // family with sequence similarity 189, member A1 // family with sequence similarity 189, member A1		2	2	coding	6
Fam40b	family with sequence similarity 40, member B // family with sequence similarity 40, member B // family with sequence similarity 40, member B // family with sequence similarity 40, member B // family with sequence similarity 40, member B // family with sequence similarity 40, member B // family with sequence similarity 40, member B // family with sequence similarity 40, member B // family with seq…		4	3	coding	12
Fam57b	family with sequence similarity 57, member B // family with sequence similarity 57, member B // family with sequence similarity 57, member B // family with sequence similarity 57, member B // family with sequence similarity 57, member B // family with sequence similarity 57, member B // family with sequence similarity 57, member B // family with sequence similarity 57, member B		4	3	coding	3
Fam70a	family with sequence similarity 70, member A // family with sequence similarity 70, member A // family with sequence similarity 70, member A // family with sequence similarity 70, member A // family with sequence similarity 70, member A // family with sequence similarity 70, member A // family with sequence similarity 70, member A // family with sequence similarity 70, member A // family with seq…		2	1	coding	6
Fam73a	family with sequence similarity 73, member A // family with sequence similarity 73, member A // family with sequence similarity 73, member A // family with sequence similarity 73, member A // family with sequence similarity 73, member A // family with sequence similarity 73, member A // family with sequence similarity 73, member A // family with sequence similarity 73, member A // family with seq…		3	3	coding	6
Far2	fatty acyl CoA reductase 2 // fatty acyl CoA reductase 2 // fatty acyl CoA reductase 2 // fatty acyl CoA reductase 2		3	3	coding	12
Fasn	fatty acid synthase // fatty acid synthase // fatty acid synthase // fatty acid synthase		2	2	coding	6
Fblim1	filamin binding LIM protein 1 // filamin binding LIM protein 1 // filamin binding LIM protein 1 // filamin binding LIM protein 1 // filamin binding LIM protein 1 // filamin binding LIM protein 1 // filamin binding LIM protein 1 // filamin binding LIM protein 1 // filamin binding LIM protein 1 // filamin binding LIM protein 1 // filamin binding LIM protein 1 // filamin binding LIM protein 1 // fil…		3	3	coding	78
Fbxl21	F-box and leucine-rich repeat protein 21 // F-box and leucine-rich repeat protein 21 // F-box and leucine-rich repeat protein 21 // F-box and leucine-rich repeat protein 21 // F-box and leucine-rich repeat protein 21 // F-box and leucine-rich repeat protein 21 // F-box and leucine-rich repeat protein 21 // F-box and leucine-rich repeat protein 21 // F-box and leucine-rich repeat protein 21 // F-b…		2	2	coding	6
Fbxo16	F-box protein 16 // F-box protein 16 // F-box protein 16 // F-box protein 16 // F-box protein 16 // F-box protein 16 // F-box protein 16 // F-box protein 16		3	3	coding	12
Fbxo2	F-box protein 2 // F-box protein 2 // F-box protein 2		3	2	coding	12
Fbxo31	F-box protein 31 // F-box protein 31 // F-box protein 31 // F-box protein 31 // F-box protein 31 // F-box protein 31		3	3	coding	3
Fbxo9	f-box protein 9 // f-box protein 9 // f-box protein 9 // f-box protein 9 // f-box protein 9 // f-box protein 9		1	1	coding	3
Fbxw7	F-box and WD-40 domain protein 7 // F-box and WD-40 domain protein 7 // F-box and WD-40 domain protein 7 // F-box and WD-40 domain protein 7 // F-box and WD-40 domain protein 7 // F-box and WD-40 domain protein 7 // F-box and WD-40 domain protein 7 // F-box and WD-40 domain protein 7		2	2	coding	3
Fcgr2b	Fc receptor, IgG, low affinity IIb // Fc receptor, IgG, low affinity IIb // Fc receptor, IgG, low affinity IIb // Fc receptor, IgG, low affinity IIb // Fc receptor, IgG, low affinity IIb // Fc receptor, IgG, low affinity IIb // Fc receptor, IgG, low affinity IIb // Fc receptor, IgG, low affinity IIb // Fc receptor, IgG, low affinity IIb // Fc receptor, IgG, low affinity IIb // Fc receptor, IgG, l…		1	1	coding	67
Fcgr3	Fc receptor, IgG, low affinity III // Fc receptor, IgG, low affinity III // Fc receptor, IgG, low affinity III // Fc receptor, IgG, low affinity III // Fc receptor, IgG, low affinity III		2	2	coding	78
Fgf1	fibroblast growth factor 1 // fibroblast growth factor 1 // fibroblast growth factor 1 // fibroblast growth factor 1 // fibroblast growth factor 1 // fibroblast growth factor 1		3	3	coding	12
Fgf11	fibroblast growth factor 11 // fibroblast growth factor 11 // sperm maturation 1 // sperm maturation 1 // fibroblast growth factor 11 // fibroblast growth factor 11 // sperm maturation 1		2	2	coding	12
Fgf9	fibroblast growth factor 9 // fibroblast growth factor 9 // fibroblast growth factor 9		1	1	coding	12
Fignl1	fidgetin-like 1 // fidgetin-like 1 // fidgetin-like 1 // fidgetin-like 1 // fidgetin-like 1 // fidgetin-like 1 // fidgetin-like 1 // fidgetin-like 1 // fidgetin-like 1		1	1	coding	75
Flrt1	fibronectin leucine rich transmembrane protein 1 // fibronectin leucine rich transmembrane protein 1 // fibronectin leucine rich transmembrane protein 1		7	3	coding	6
Flt3	FMS-like tyrosine kinase 3 // FMS-like tyrosine kinase 3 // FMS-like tyrosine kinase 3 // FMS-like tyrosine kinase 3 // FMS-like tyrosine kinase 3 // FMS-like tyrosine kinase 3 // FMS-like tyrosine kinase 3 // FMS-like tyrosine kinase 3		3	2	coding	12
Flywch1	FLYWCH-type zinc finger 1 // FLYWCH-type zinc finger 1 // RIKEN cDNA 9530082P21 gene // FLYWCH-type zinc finger 1 // FLYWCH-type zinc finger 1 // FLYWCH-type zinc finger 1		1	1	coding	3
Fmn2	formin 2 // formin 2 // formin 2 // formin 2 // formin 2		1	1	coding	12
Fndc5	fibronectin type III domain containing 5 // fibronectin type III domain containing 5 // fibronectin type III domain containing 5 // fibronectin type III domain containing 5 // fibronectin type III domain containing 5 // fibronectin type III domain containing 5		1	1	coding	3
Frmd5	FERM domain containing 5 // FERM domain containing 5 // FERM domain containing 5 // FERM domain containing 5 // FERM domain containing 5		5	4	coding	6
Frmpd3	FERM and PDZ domain containing 3 // FERM and PDZ domain containing 3		3	3	coding	12
Frrs1	ferric-chelate reductase 1 // ferric-chelate reductase 1 // ferric-chelate reductase 1 // ferric-chelate reductase 1 // ferric-chelate reductase 1 // ferric-chelate reductase 1 // ferric-chelate reductase 1 // ferric-chelate reductase 1		3	2	coding	78
Fsd1	fibronectin type 3 and SPRY domain-containing protein // fibronectin type 3 and SPRY domain-containing protein // fibronectin type 3 and SPRY domain-containing protein // fibronectin type 3 and SPRY domain-containing protein // fibronectin type 3 and SPRY domain-containing protein // fibronectin type 3 and SPRY domain-containing protein		4	4	coding	12
Fstl4	follistatin-like 4		3	2	coding	12
Fstl5	follistatin-like 5 // follistatin-like 5 // follistatin-like 5 // follistatin-like 5 // follistatin-like 5		5	3	coding	12
Furin	furin (paired basic amino acid cleaving enzyme) // furin (paired basic amino acid cleaving enzyme) // furin (paired basic amino acid cleaving enzyme) // furin (paired basic amino acid cleaving enzyme) // furin (paired basic amino acid cleaving enzyme) // furin (paired basic amino acid cleaving enzyme) // furin (paired basic amino acid cleaving enzyme) // furin (paired basic amino acid cleaving en…		2	2	coding	78
Fxyd5	FXYD domain-containing ion transport regulator 5 // FXYD domain-containing ion transport regulator 5 // FXYD domain-containing ion transport regulator 5 // FXYD domain-containing ion transport regulator 5 // FXYD domain-containing ion transport regulator 5 // FXYD domain-containing ion transport regulator 5 // FXYD domain-containing ion transport regulator 5 // FXYD domain-containing ion transpor…		2	1	coding	67
Fxyd7	FXYD domain-containing ion transport regulator 7 // FXYD domain-containing ion transport regulator 7 // FXYD domain-containing ion transport regulator 7 // FXYD domain-containing ion transport regulator 7 // FXYD domain-containing ion transport regulator 7 // FXYD domain-containing ion transport regulator 7		6	5	coding	6
Gabbr1	gamma-aminobutyric acid (GABA) B receptor, 1 // gamma-aminobutyric acid (GABA) B receptor, 1 // gamma-aminobutyric acid (GABA) B receptor, 1 // gamma-aminobutyric acid (GABA) B receptor, 1 // gamma-aminobutyric acid (GABA) B receptor, 1 // gamma-aminobutyric acid (GABA) B receptor, 1 // gamma-aminobutyric acid (GABA) B receptor, 1 // gamma-aminobutyric acid (GABA) B receptor, 1 // gamma-aminobuty…		1	1	coding	12
Gabra1	gamma-aminobutyric acid (GABA) A receptor, subunit alpha 1 // gamma-aminobutyric acid (GABA) A receptor, subunit alpha 1 // gamma-aminobutyric acid (GABA) A receptor, subunit alpha 1 // gamma-aminobutyric acid (GABA) A receptor, subunit alpha 1 // gamma-aminobutyric acid (GABA) A receptor, subunit alpha 1 // gamma-aminobutyric acid (GABA) A receptor, subunit alpha 1 // gamma-aminobutyric acid (GA…		2	2	coding	12
Gabra2	gamma-aminobutyric acid (GABA) A receptor, subunit alpha 2 // gamma-aminobutyric acid (GABA) A receptor, subunit alpha 2 // gamma-aminobutyric acid (GABA) A receptor, subunit alpha 2		1	1	coding	12
Gabra3	gamma-aminobutyric acid (GABA) A receptor, subunit alpha 3 // gamma-aminobutyric acid (GABA) A receptor, subunit alpha 3 // gamma-aminobutyric acid (GABA) A receptor, subunit alpha 3 // gamma-aminobutyric acid (GABA) A receptor, subunit alpha 3 // gamma-aminobutyric acid (GABA) A receptor, subunit alpha 3 // gamma-aminobutyric acid (GABA) A receptor, subunit alpha 3 // gamma-aminobutyric acid (GA…		1	1	coding	12
Gabra5	gamma-aminobutyric acid (GABA) A receptor, subunit alpha 5 // gamma-aminobutyric acid (GABA) A receptor, subunit alpha 5 // gamma-aminobutyric acid (GABA) A receptor, subunit alpha 5		3	3	coding	12
Gabrb2	gamma-aminobutyric acid (GABA) A receptor, subunit beta 2 // gamma-aminobutyric acid (GABA) A receptor, subunit beta 2 // gamma-aminobutyric acid (GABA) A receptor, subunit beta 2 // gamma-aminobutyric acid (GABA) A receptor, subunit beta 2 // gamma-aminobutyric acid (GABA) A receptor, subunit beta 2 // gamma-aminobutyric acid (GABA) A receptor, subunit beta 2 // gamma-aminobutyric acid (GABA) A …		1	1	coding	6
Gabrb2	gamma-aminobutyric acid (GABA) A receptor, subunit beta 2 // gamma-aminobutyric acid (GABA) A receptor, subunit beta 2 // gamma-aminobutyric acid (GABA) A receptor, subunit beta 2 // gamma-aminobutyric acid (GABA) A receptor, subunit beta 2		1	1	coding	12
Gabrg2	gamma-aminobutyric acid (GABA) A receptor, subunit gamma 2 // gamma-aminobutyric acid (GABA) A receptor, subunit gamma 2 // gamma-aminobutyric acid (GABA) A receptor, subunit gamma 2 // gamma-aminobutyric acid (GABA) A receptor, subunit gamma 2 // gamma-aminobutyric acid (GABA) A receptor, subunit gamma 2 // gamma-aminobutyric acid (GABA) A receptor, subunit gamma 2 // gamma-aminobutyric acid (GA…		1	1	coding	12
Gad1	glutamate decarboxylase 1 // glutamate decarboxylase 1 // glutamate decarboxylase 1 // glutamate decarboxylase 1 // glutamate decarboxylase 1 // glutamate decarboxylase 1 // glutamate decarboxylase 1 // glutamate decarboxylase 1 // glutamate decarboxylase 1 // glutamate decarboxylase 1 // glutamate decarboxylase 1		5	5	coding	12
Gad2	glutamic acid decarboxylase 2 // glutamic acid decarboxylase 2 // glutamic acid decarboxylase 2 // glutamic acid decarboxylase 2 // glutamic acid decarboxylase 2 // glutamic acid decarboxylase 2 // glutamic acid decarboxylase 2		1	1	coding	30
Galnt13	UDP-N-acetyl-alpha-D-galactosamine:polypeptide N-acetylgalactosaminyltransferase 13 // UDP-N-acetyl-alpha-D-galactosamine:polypeptide N-acetylgalactosaminyltransferase 13 // UDP-N-acetyl-alpha-D-galactosamine:polypeptide N-acetylgalactosaminyltransferase 13 // UDP-N-acetyl-alpha-D-galactosamine:polypeptide N-acetylgalactosaminyltransferase 13 // UDP-N-acetyl-alpha-D-galactosamine:polypeptide N-ac…		6	3	coding	6
Galnt9	UDP-N-acetyl-alpha-D-galactosamine:polypeptide N-acetylgalactosaminyltransferase 9 // UDP-N-acetyl-alpha-D-galactosamine:polypeptide N-acetylgalactosaminyltransferase 9 // UDP-N-acetyl-alpha-D-galactosamine:polypeptide N-acetylgalactosaminyltransferase 9 // UDP-N-acetyl-alpha-D-galactosamine:polypeptide N-acetylgalactosaminyltransferase 9 // UDP-N-acetyl-alpha-D-galactosamine:polypeptide N-acetyl…		2	2	coding	6
Gba2	glucosidase beta 2 // glucosidase beta 2 // glucosidase beta 2 // glucosidase beta 2 // glucosidase beta 2 // glucosidase beta 2 // glucosidase beta 2 // glucosidase beta 2 // glucosidase beta 2 // glucosidase beta 2 // glucosidase beta 2 // glucosidase beta 2 // glucosidase beta 2 // glucosidase beta 2		3	3	coding	6
Gdap1	ganglioside-induced differentiation-associated-protein 1 // ganglioside-induced differentiation-associated-protein 1 // ganglioside-induced differentiation-associated-protein 1 // ganglioside-induced differentiation-associated-protein 1 // ganglioside-induced differentiation-associated-protein 1 // ganglioside-induced differentiation-associated-protein 1 // ganglioside-induced differentiation-ass…		2	2	coding	12
Ggt7	gamma-glutamyltransferase 7 // gamma-glutamyltransferase 7 // gamma-glutamyltransferase 7 // gamma-glutamyltransferase 7 // gamma-glutamyltransferase 7 // gamma-glutamyltransferase 7 // gamma-glutamyltransferase 7 // gamma-glutamyltransferase 7 // gamma-glutamyltransferase 7 // gamma-glutamyltransferase 7 // gamma-glutamyltransferase 7 // gamma-glutamyltransferase 7		1	1	coding	12
Ggta1	glycoprotein galactosyltransferase alpha 1, 3 // glycoprotein galactosyltransferase alpha 1, 3 // glycoprotein galactosyltransferase alpha 1, 3 // glycoprotein galactosyltransferase alpha 1, 3 // glycoprotein galactosyltransferase alpha 1, 3 // glycoprotein galactosyltransferase alpha 1, 3 // glycoprotein galactosyltransferase alpha 1, 3 // glycoprotein galactosyltransferase alpha 1, 3 // glycopr…		4	3	coding	78
Gjc2	gap junction protein, gamma 2 // gap junction protein, gamma 2 // gap junction protein, gamma 2 // gap junction protein, gamma 2 // gap junction protein, gamma 2 // gap junction protein, gamma 2 // gap junction protein, gamma 2 // gap junction protein, gamma 2 // gap junction protein, gamma 2 // gap junction protein, gamma 2		2	2	coding	12
Glipr1	GLI pathogenesis-related 1 (glioma) // GLI pathogenesis-related 1 (glioma) // GLI pathogenesis-related 1 (glioma) // KRR1, small subunit (SSU) processome component, homolog (yeast) // KRR1, small subunit (SSU) processome component, homolog (yeast) // GLI pathogenesis-related 1 (glioma) // GLI pathogenesis-related 1 (glioma) // GLI pathogenesis-related 1 (glioma) // GLI pathogenesis-related 1 (gli…		1	1	coding	78
Glra1	glycine receptor, alpha 1 subunit // glycine receptor, alpha 1 subunit // glycine receptor, alpha 1 subunit // glycine receptor, alpha 1 subunit // glycine receptor, alpha 1 subunit		1	1	coding	12
Glra2	glycine receptor, alpha 2 subunit // glycine receptor, alpha 2 subunit // glycine receptor, alpha 2 subunit // glycine receptor, alpha 2 subunit		3	3	coding	12
Glra3	glycine receptor, alpha 3 subunit // glycine receptor, alpha 3 subunit // glycine receptor, alpha 3 subunit // glycine receptor, alpha 3 subunit // glycine receptor, alpha 3 subunit // glycine receptor, alpha 3 subunit		2	2	coding	12
Glrb	glycine receptor, beta subunit // glycine receptor, beta subunit // glycine receptor, beta subunit // glycine receptor, beta subunit // glycine receptor, beta subunit // glycine receptor, beta subunit // glycine receptor, beta subunit // glycine receptor, beta subunit // glycine receptor, beta subunit // glycine receptor, beta subunit		2	2	coding	12
Gm11428	predicted gene 11428 // predicted gene 11428 // predicted gene 11428 // predicted gene 11428		3	3	coding	67
Gm5567	predicted gene 5567 // predicted gene 5567		1	1	coding	3
Gm996	predicted gene 996 // predicted gene 996 // predicted gene 996 // predicted gene 996 // predicted gene 996 // predicted gene 996		1	1	coding	6
Gnal	guanine nucleotide binding protein, alpha stimulating, olfactory type // guanine nucleotide binding protein, alpha stimulating, olfactory type // guanine nucleotide binding protein, alpha stimulating, olfactory type // guanine nucleotide binding protein, alpha stimulating, olfactory type // guanine nucleotide binding protein, alpha stimulating, olfactory type		1	1	coding	12
Gnao1	guanine nucleotide binding protein, alpha O // guanine nucleotide binding protein, alpha O // guanine nucleotide binding protein, alpha O // guanine nucleotide binding protein, alpha O // guanine nucleotide binding protein, alpha O // guanine nucleotide binding protein, alpha O		1	1	coding	30
Gnaz	guanine nucleotide binding protein, alpha z subunit // guanine nucleotide binding protein, alpha z subunit // guanine nucleotide binding protein, alpha z subunit // guanine nucleotide binding protein, alpha z subunit		1	1	coding	3
Gnl3l	guanine nucleotide binding protein-like 3 (nucleolar)-like // guanine nucleotide binding protein-like 3 (nucleolar)-like // guanine nucleotide binding protein-like 3 (nucleolar)-like // guanine nucleotide binding protein-like 3 (nucleolar)-like // guanine nucleotide binding protein-like 3 (nucleolar)-like // guanine nucleotide binding protein-like 3 (nucleolar)-like // guanine nucleotide binding …		3	2	coding	30
Got1	glutamate oxaloacetate transaminase 1, soluble // glutamate oxaloacetate transaminase 1, soluble // glutamate oxaloacetate transaminase 1, soluble // glutamate oxaloacetate transaminase 1, soluble // glutamate oxaloacetate transaminase 1, soluble // glutamate oxaloacetate transaminase 1, soluble // glutamate oxaloacetate transaminase 1, soluble // glutamate oxaloacetate transaminase 1, soluble		2	2	coding	6
Gphn	gephyrin // gephyrin // gephyrin // gephyrin // gephyrin		2	2	coding	6
Gpr137	G protein-coupled receptor 137 // G protein-coupled receptor 137 // G protein-coupled receptor 137 // G protein-coupled receptor 137 // G protein-coupled receptor 137 // G protein-coupled receptor 137 // G protein-coupled receptor 137 // G protein-coupled receptor 137 // G protein-coupled receptor 137 // G protein-coupled receptor 137 // G protein-coupled receptor 137 // G protein-coupled recepto…		2	2	coding	3
Gpr149	G protein-coupled receptor 149 // G protein-coupled receptor 149 // G protein-coupled receptor 149 // G protein-coupled receptor 149 // G protein-coupled receptor 149 // G protein-coupled receptor 149 // G protein-coupled receptor 149		2	2	coding	12
Gpr162	G protein-coupled receptor 162 // G protein-coupled receptor 162 // G protein-coupled receptor 162 // G protein-coupled receptor 162 // G protein-coupled receptor 162 // G protein-coupled receptor 162 // G protein-coupled receptor 162 // G protein-coupled receptor 162		4	4	coding	6
Gpr183	G protein-coupled receptor 183 // G protein-coupled receptor 183		3	2	coding	78
Gpr22	G protein-coupled receptor 22 // G protein-coupled receptor 22 // G protein-coupled receptor 22 // G protein-coupled receptor 22 // G protein-coupled receptor 22 // G protein-coupled receptor 22 // G protein-coupled receptor 22 // G protein-coupled receptor 22		5	3	coding	3
Gpr35	G protein-coupled receptor 35 // G protein-coupled receptor 35 // G protein-coupled receptor 35 // G protein-coupled receptor 35 // G protein-coupled receptor 35 // G protein-coupled receptor 35		5	5	coding	75
Gpr37	G protein-coupled receptor 37 // G protein-coupled receptor 37 // G protein-coupled receptor 37 // G protein-coupled receptor 37 // G protein-coupled receptor 37 // G protein-coupled receptor 37 // G protein-coupled receptor 37		9	6	coding	12
Gpr45	G protein-coupled receptor 45		1	1	coding	3
Gpr75	G protein-coupled receptor 75 // G protein-coupled receptor 75 // G protein-coupled receptor 75 // G protein-coupled receptor 75 // G protein-coupled receptor 75 // G protein-coupled receptor 75 // G protein-coupled receptor 75 // G protein-coupled receptor 75		3	3	coding	12
Gpr83	G protein-coupled receptor 83 // G protein-coupled receptor 83 // G protein-coupled receptor 83 // G protein-coupled receptor 83 // G protein-coupled receptor 83 // G protein-coupled receptor 83 // G protein-coupled receptor 83 // G protein-coupled receptor 83 // G protein-coupled receptor 83 // G protein-coupled receptor 83		2	2	coding	6
Gprasp1	G protein-coupled receptor associated sorting protein 1 // G protein-coupled receptor associated sorting protein 1 // G protein-coupled receptor associated sorting protein 1 // G protein-coupled receptor associated sorting protein 1 // G protein-coupled receptor associated sorting protein 1 // G protein-coupled receptor associated sorting protein 1 // G protein-coupled receptor associated sorting…		2	2	coding	12
Gprc5b	G protein-coupled receptor, family C, group 5, member B // G protein-coupled receptor, family C, group 5, member B // G protein-coupled receptor, family C, group 5, member B		5	3	coding	6
Gpx1	glutathione peroxidase 1 // glutathione peroxidase 1 // glutathione peroxidase 1 // glutathione peroxidase 1		3	3	coding	78
Gria1	glutamate receptor, ionotropic, AMPA1 (alpha 1) // glutamate receptor, ionotropic, AMPA1 (alpha 1) // glutamate receptor, ionotropic, AMPA1 (alpha 1) // glutamate receptor, ionotropic, AMPA1 (alpha 1) // glutamate receptor, ionotropic, AMPA1 (alpha 1) // glutamate receptor, ionotropic, AMPA1 (alpha 1) // glutamate receptor, ionotropic, AMPA1 (alpha 1)		2	2	coding	12
Gria2	glutamate receptor, ionotropic, AMPA2 (alpha 2) // glutamate receptor, ionotropic, AMPA2 (alpha 2) // glutamate receptor, ionotropic, AMPA2 (alpha 2) // glutamate receptor, ionotropic, AMPA2 (alpha 2) // glutamate receptor, ionotropic, AMPA2 (alpha 2) // glutamate receptor, ionotropic, AMPA2 (alpha 2) // glutamate receptor, ionotropic, AMPA2 (alpha 2)		3	3	coding	6
Gria4	glutamate receptor, ionotropic, AMPA4 (alpha 4) // glutamate receptor, ionotropic, AMPA4 (alpha 4) // glutamate receptor, ionotropic, AMPA4 (alpha 4) // glutamate receptor, ionotropic, AMPA4 (alpha 4) // glutamate receptor, ionotropic, AMPA4 (alpha 4) // glutamate receptor, ionotropic, AMPA4 (alpha 4) // glutamate receptor, ionotropic, AMPA4 (alpha 4) // glutamate receptor, ionotropic, AMPA4 (alp…		3	3	coding	6
Grid1	glutamate receptor, ionotropic, delta 1 // glutamate receptor, ionotropic, delta 1 // glutamate receptor, ionotropic, delta 1		3	3	coding	12
Grik1	glutamate receptor, ionotropic, kainate 1 // glutamate receptor, ionotropic, kainate 1 // glutamate receptor, ionotropic, kainate 1 // glutamate receptor, ionotropic, kainate 1 // glutamate receptor, ionotropic, kainate 1 // glutamate receptor, ionotropic, kainate 1		2	2	coding	6
Grik2	glutamate receptor, ionotropic, kainate 2 (beta 2) // glutamate receptor, ionotropic, kainate 2 (beta 2) // glutamate receptor, ionotropic, kainate 2 (beta 2) // proteasome (prosome, macropain) subunit, alpha type 6 pseudogene // glutamate receptor, ionotropic, kainate 2 (beta 2) // glutamate receptor, ionotropic, kainate 2 (beta 2)		1	1	coding	6
Grin2a	glutamate receptor, ionotropic, NMDA2A (epsilon 1) // glutamate receptor, ionotropic, NMDA2A (epsilon 1) // glutamate receptor, ionotropic, NMDA2A (epsilon 1) // glutamate receptor, ionotropic, NMDA2A (epsilon 1)		4	4	coding	12
Grin2b	glutamate receptor, ionotropic, NMDA2B (epsilon 2) // glutamate receptor, ionotropic, NMDA2B (epsilon 2) // glutamate receptor, ionotropic, NMDA2B (epsilon 2)		2	2	coding	6
Grm3	glutamate receptor, metabotropic 3 // glutamate receptor, metabotropic 3 // glutamate receptor, metabotropic 3		3	3	coding	6
Grm4	glutamate receptor, metabotropic 4 // glutamate receptor, metabotropic 4 // glutamate receptor, metabotropic 4 // glutamate receptor, metabotropic 4 // glutamate receptor, metabotropic 4 // glutamate receptor, metabotropic 4 // glutamate receptor, metabotropic 4 // glutamate receptor, metabotropic 4 // glutamate receptor, metabotropic 4		2	2	coding	12
Grn	granulin // granulin // granulin // granulin // granulin // granulin // granulin // granulin // granulin // granulin // granulin // granulin // granulin // granulin // granulin // granulin // granulin // granulin		1	1	coding	78
Gstm7	glutathione S-transferase, mu 7 // glutathione S-transferase, mu 7 // glutathione S-transferase, mu 7 // glutathione S-transferase, mu 7 // glutathione S-transferase, mu 7 // glutathione S-transferase, mu 7		2	2	coding	12
Gucy1b3	guanylate cyclase 1, soluble, beta 3 // guanylate cyclase 1, soluble, beta 3 // guanylate cyclase 1, soluble, beta 3 // guanylate cyclase 1, soluble, beta 3		3	3	coding	6
Guk1	guanylate kinase 1 // guanylate kinase 1 // guanylate kinase 1 // guanylate kinase 1 // guanylate kinase 1 // guanylate kinase 1 // guanylate kinase 1 // guanylate kinase 1 // guanylate kinase 1 // guanylate kinase 1 // guanylate kinase 1 // guanylate kinase 1 // guanylate kinase 1		3	2	coding	30
Habp4	hyaluronic acid binding protein 4 // hyaluronic acid binding protein 4 // hyaluronic acid binding protein 4 // hyaluronic acid binding protein 4 // hyaluronic acid binding protein 4 // hyaluronic acid binding protein 4		1	1	coding	12
Hal	histidine ammonia lyase // histidine ammonia lyase // histidine ammonia lyase // histidine ammonia lyase // histidine ammonia lyase // histidine ammonia lyase // histidine ammonia lyase // histidine ammonia lyase // histidine ammonia lyase // histidine ammonia lyase		4	3	coding	75
Hapln4	hyaluronan and proteoglycan link protein 4 // hyaluronan and proteoglycan link protein 4 // neurocan // neurocan // hyaluronan and proteoglycan link protein 4 // hyaluronan and proteoglycan link protein 4 // hyaluronan and proteoglycan link protein 4 // neurocan // hyaluronan and proteoglycan link protein 4		2	2	coding	12
Hbb-b1	hemoglobin, beta adult major chain // hemoglobin subunit beta-1-like // hemoglobin, beta adult minor chain // hemoglobin, beta adult major chain // hemoglobin subunit beta-1-like // hemoglobin subunit beta-1-like // hemoglobin, beta adult minor chain // hemoglobin, beta adult major chain // hemoglobin subunit beta-1-like // hemoglobin, beta adult minor chain // hemoglobin, beta adult major chain …		2	1	coding	12
Hdac11	histone deacetylase 11 // histone deacetylase 11 // histone deacetylase 11 // histone deacetylase 11 // histone deacetylase 11 // histone deacetylase 11 // histone deacetylase 11 // histone deacetylase 11 // histone deacetylase 11		3	3	coding	12
Hecw1	HECT, C2 and WW domain containing E3 ubiquitin protein ligase 1 // HECT, C2 and WW domain containing E3 ubiquitin protein ligase 1 // HECT, C2 and WW domain containing E3 ubiquitin protein ligase 1 // HECT, C2 and WW domain containing E3 ubiquitin protein ligase 1 // HECT, C2 and WW domain containing E3 ubiquitin protein ligase 1 // HECT, C2 and WW domain containing E3 ubiquitin protein ligase 1 …		1	1	coding	12
Hecw2	HECT, C2 and WW domain containing E3 ubiquitin protein ligase 2 // HECT, C2 and WW domain containing E3 ubiquitin protein ligase 2 // HECT, C2 and WW domain containing E3 ubiquitin protein ligase 2		8	6	coding	12
Hepacam	hepatocyte cell adhesion molecule // hepatocyte cell adhesion molecule // hepatocyte cell adhesion molecule // hepatocyte cell adhesion molecule // hepatocyte cell adhesion molecule // hepatocyte cell adhesion molecule		2	2	coding	12
Herc3	hect domain and RLD 3 // hect domain and RLD 3 // hect domain and RLD 3 // hect domain and RLD 3 // hect domain and RLD 3 // hect domain and RLD 3 // hect domain and RLD 3 // hect domain and RLD 3		8	6	coding	12
Hist1h1d	histone cluster 1, H1d // histone cluster 1, H1d // histone cluster 1, H1d // histone cluster 1, H1d // histone cluster 1, H1d // histone cluster 1, H1d		3	1	coding	75
Hmgcs1	3-hydroxy-3-methylglutaryl-Coenzyme A synthase 1 // 3-hydroxy-3-methylglutaryl-Coenzyme A synthase 1 // 3-hydroxy-3-methylglutaryl-Coenzyme A synthase 1 // 3-hydroxy-3-methylglutaryl-Coenzyme A synthase 1 // 3-hydroxy-3-methylglutaryl-Coenzyme A synthase 1 // 3-hydroxy-3-methylglutaryl-Coenzyme A synthase 1 // 3-hydroxy-3-methylglutaryl-Coenzyme A synthase 1 // 3-hydroxy-3-methylglutaryl-Coenzyme…		1	1	coding	3
Hoxb5	homeobox B5 // homeobox B5 // homeobox B5 // homeobox B5 // homeobox B5 // homeobox B5		5	3	coding	6
Hoxb8	homeobox B8 // homeobox B8 // homeobox B8 // homeobox B8 // homeobox B8 // homeobox B8 // homeobox B7 // homeobox B8 // homeobox B8 // homeobox B8 // homeobox B8		8	6	coding	12
Hoxb9	homeobox B9 // homeobox B9 // homeobox B9 // homeobox B9 // homeobox B9		4	3	coding	6
Hpca	hippocalcin // hippocalcin // hippocalcin // hippocalcin // hippocalcin // hippocalcin // hippocalcin // hippocalcin // hippocalcin // hippocalcin // hippocalcin // hippocalcin		3	3	coding	12
Hpcal4	hippocalcin-like 4 // hippocalcin-like 4 // hippocalcin-like 4 // hippocalcin-like 4 // hippocalcin-like 4 // hippocalcin-like 4 // hippocalcin-like 4 // hippocalcin-like 4		2	2	coding	12
Hrasls	HRAS-like suppressor // HRAS-like suppressor // HRAS-like suppressor // HRAS-like suppressor		5	5	coding	6
Hspa12a	heat shock protein 12A // heat shock protein 12A // heat shock protein 12A		2	2	coding	12
Hspa4l	heat shock protein 4 like // heat shock protein 4 like // heat shock protein 4 like // heat shock protein 4 like // heat shock protein 4 like // heat shock protein 4 like // heat shock protein 4 like // heat shock protein 4 like // heat shock protein 4 like		1	1	coding	12
Hsph1	heat shock 105kDa/110kDa protein 1 // heat shock 105kDa/110kDa protein 1 // heat shock 105kDa/110kDa protein 1 // heat shock 105kDa/110kDa protein 1 // heat shock 105kDa/110kDa protein 1 // heat shock 105kDa/110kDa protein 1 // heat shock 105kDa/110kDa protein 1 // heat shock 105kDa/110kDa protein 1 // heat shock 105kDa/110kDa protein 1 // heat shock 105kDa/110kDa protein 1 // heat shock 105kDa/1…		2	2	coding	30
Htr2c	5-hydroxytryptamine (serotonin) receptor 2C // 5-hydroxytryptamine (serotonin) receptor 2C // 5-hydroxytryptamine (serotonin) receptor 2C // 5-hydroxytryptamine (serotonin) receptor 2C // 5-hydroxytryptamine (serotonin) receptor 2C // 5-hydroxytryptamine (serotonin) receptor 2C // 5-hydroxytryptamine (serotonin) receptor 2C // 5-hydroxytryptamine (serotonin) receptor 2C // 5-hydroxytryptamine (se…		1	1	coding	30
Il1r1	interleukin 1 receptor, type I // interleukin 1 receptor, type I // interleukin 1 receptor, type I // interleukin 1 receptor, type I // interleukin 1 receptor, type I		1	1	coding	67
Il4ra	interleukin 4 receptor, alpha // interleukin 4 receptor, alpha // interleukin 4 receptor, alpha // interleukin 4 receptor, alpha // interleukin 4 receptor, alpha // interleukin 4 receptor, alpha // interleukin 4 receptor, alpha // interleukin 4 receptor, alpha		3	1	coding	75
Impact	imprinted and ancient // imprinted and ancient // imprinted and ancient		2	2	coding	6
Ina	internexin neuronal intermediate filament protein, alpha // internexin neuronal intermediate filament protein, alpha // internexin neuronal intermediate filament protein, alpha // internexin neuronal intermediate filament protein, alpha // internexin neuronal intermediate filament protein, alpha // internexin neuronal intermediate filament protein, alpha		1	1	coding	12
Inpp5j	inositol polyphosphate 5-phosphatase J // inositol polyphosphate 5-phosphatase J // inositol polyphosphate 5-phosphatase J // inositol polyphosphate 5-phosphatase J // inositol polyphosphate 5-phosphatase J // inositol polyphosphate 5-phosphatase J // inositol polyphosphate 5-phosphatase J // inositol polyphosphate 5-phosphatase J // inositol polyphosphate 5-phosphatase J // inositol polyphosphat…		1	1	coding	12
Insig1	insulin induced gene 1 // insulin induced gene 1 // insulin induced gene 1		2	2	coding	3
Itgam	integrin alpha M // integrin alpha M // integrin alpha M // integrin alpha M // integrin alpha M // integrin alpha M // integrin alpha M // integrin alpha M // integrin alpha M // integrin alpha M // integrin alpha M // integrin alpha M		1	1	coding	78
Itgb1	integrin beta 1 (fibronectin receptor beta) // integrin beta 1 (fibronectin receptor beta) // integrin beta 1 (fibronectin receptor beta) // integrin beta 1 (fibronectin receptor beta) // integrin beta 1 (fibronectin receptor beta) // integrin beta 1 (fibronectin receptor beta) // integrin beta 1 (fibronectin receptor beta) // integrin beta 1 (fibronectin receptor beta) // integrin beta 1 (fibron…		1	1	coding	78
Jph1	junctophilin 1 // junctophilin 1 // junctophilin 1		1	1	coding	12
Jph3	junctophilin 3 // junctophilin 3 // junctophilin 3 // junctophilin 3 // junctophilin 3 // junctophilin 3		4	4	coding	12
Kbtbd3	kelch repeat and BTB (POZ) domain containing 3 // kelch repeat and BTB (POZ) domain containing 3 // kelch repeat and BTB (POZ) domain containing 3 // kelch repeat and BTB (POZ) domain containing 3 // kelch repeat and BTB (POZ) domain containing 3 // kelch repeat and BTB (POZ) domain containing 3 // kelch repeat and BTB (POZ) domain containing 3 // kelch repeat and BTB (POZ) domain containing 3		1	1	coding	12
Kcna1	potassium voltage-gated channel, shaker-related subfamily, member 1 // potassium voltage-gated channel, shaker-related subfamily, member 1 // potassium voltage-gated channel, shaker-related subfamily, member 1 // potassium voltage-gated channel, shaker-related subfamily, member 1 // potassium voltage-gated channel, shaker-related subfamily, member 1		2	2	coding	12
Kcna2	potassium voltage-gated channel, shaker-related subfamily, member 2 // potassium voltage-gated channel, shaker-related subfamily, member 2 // potassium voltage-gated channel, shaker-related subfamily, member 2		4	3	coding	6
Kcna4	potassium voltage-gated channel, shaker-related subfamily, member 4 // potassium voltage-gated channel, shaker-related subfamily, member 4 // potassium voltage-gated channel, shaker-related subfamily, member 4 // potassium voltage-gated channel, shaker-related subfamily, member 4 // potassium voltage-gated channel, shaker-related subfamily, member 4 // potassium voltage-gated channel, shaker-rela…		4	4	coding	12
Kcnab2	potassium voltage-gated channel, shaker-related subfamily, beta member 2 // potassium voltage-gated channel, shaker-related subfamily, beta member 2 // potassium voltage-gated channel, shaker-related subfamily, beta member 2 // potassium voltage-gated channel, shaker-related subfamily, beta member 2 // potassium voltage-gated channel, shaker-related subfamily, beta member 2 // potassium voltage-g…		2	2	coding	3
Kcnab3	potassium voltage-gated channel, shaker-related subfamily, beta member 3 // potassium voltage-gated channel, shaker-related subfamily, beta member 3 // potassium voltage-gated channel, shaker-related subfamily, beta member 3 // potassium voltage-gated channel, shaker-related subfamily, beta member 3 // potassium voltage-gated channel, shaker-related subfamily, beta member 3 // potassium voltage-g…		3	3	coding	3
Kcnc3	potassium voltage gated channel, Shaw-related subfamily, member 3 // potassium voltage gated channel, Shaw-related subfamily, member 3 // potassium voltage gated channel, Shaw-related subfamily, member 3		4	3	coding	3
Kcnc4	potassium voltage gated channel, Shaw-related subfamily, member 4 // potassium voltage gated channel, Shaw-related subfamily, member 4 // potassium voltage gated channel, Shaw-related subfamily, member 4		4	3	coding	12
Kcnd3	potassium voltage-gated channel, Shal-related family, member 3 // potassium voltage-gated channel, Shal-related family, member 3 // potassium voltage-gated channel, Shal-related family, member 3 // potassium voltage-gated channel, Shal-related family, member 3		1	1	coding	12
Kcng4	potassium voltage-gated channel, subfamily G, member 4 // potassium voltage-gated channel, subfamily G, member 4 // potassium voltage-gated channel, subfamily G, member 4 // potassium voltage-gated channel, subfamily G, member 4 // potassium voltage-gated channel, subfamily G, member 4 // potassium voltage-gated channel, subfamily G, member 4 // potassium voltage-gated channel, subfamily G, membe…		2	2	coding	6
Kcnh2	potassium voltage-gated channel, subfamily H (eag-related), member 2 // potassium voltage-gated channel, subfamily H (eag-related), member 2 // potassium voltage-gated channel, subfamily H (eag-related), member 2 // potassium voltage-gated channel, subfamily H (eag-related), member 2 // potassium voltage-gated channel, subfamily H (eag-related), member 2 // potassium voltage-gated channel, subfam…		3	3	coding	12
Kcnh5	potassium voltage-gated channel, subfamily H (eag-related), member 5 // potassium voltage-gated channel, subfamily H (eag-related), member 5 // potassium voltage-gated channel, subfamily H (eag-related), member 5		3	3	coding	12
Kcnh7	potassium voltage-gated channel, subfamily H (eag-related), member 7 // potassium voltage-gated channel, subfamily H (eag-related), member 7		1	1	coding	6
Kcnip2	Kv channel-interacting protein 2 // Kv channel-interacting protein 2 // Kv channel-interacting protein 2 // Kv channel-interacting protein 2 // Kv channel-interacting protein 2 // Kv channel-interacting protein 2 // Kv channel-interacting protein 2 // Kv channel-interacting protein 2 // Kv channel-interacting protein 2 // Kv channel-interacting protein 2 // Kv channel-interacting protein 2 // Kv …		5	5	coding	12
Kcnip3	Kv channel interacting protein 3, calsenilin // Kv channel interacting protein 3, calsenilin // Kv channel interacting protein 3, calsenilin // Kv channel interacting protein 3, calsenilin // Kv channel interacting protein 3, calsenilin // Kv channel interacting protein 3, calsenilin // Kv channel interacting protein 3, calsenilin		3	3	coding	12
Kcnj16	potassium inwardly-rectifying channel, subfamily J, member 16 // potassium inwardly-rectifying channel, subfamily J, member 16 // potassium inwardly-rectifying channel, subfamily J, member 16 // potassium inwardly-rectifying channel, subfamily J, member 16 // potassium inwardly-rectifying channel, subfamily J, member 16 // potassium inwardly-rectifying channel, subfamily J, member 16 // potassium…		1	1	coding	12
Kcnj3	potassium inwardly-rectifying channel, subfamily J, member 3 // potassium inwardly-rectifying channel, subfamily J, member 3		1	1	coding	6
Kcnj9	potassium inwardly-rectifying channel, subfamily J, member 9 // potassium inwardly-rectifying channel, subfamily J, member 9 // potassium inwardly-rectifying channel, subfamily J, member 9 // potassium inwardly-rectifying channel, subfamily J, member 9 // potassium inwardly-rectifying channel, subfamily J, member 9 // potassium inwardly-rectifying channel, subfamily J, member 9		4	4	coding	12
Kcnk1	potassium channel, subfamily K, member 1 // potassium channel, subfamily K, member 1 // potassium channel, subfamily K, member 1		7	4	coding	12
Kcnk4	potassium channel, subfamily K, member 4 // potassium channel, subfamily K, member 4 // potassium channel, subfamily K, member 4 // potassium channel, subfamily K, member 4 // potassium channel, subfamily K, member 4 // potassium channel, subfamily K, member 4		1	1	coding	12
Kcnq2	potassium voltage-gated channel, subfamily Q, member 2 // potassium voltage-gated channel, subfamily Q, member 2 // potassium voltage-gated channel, subfamily Q, member 2 // potassium voltage-gated channel, subfamily Q, member 2 // potassium voltage-gated channel, subfamily Q, member 2 // potassium voltage-gated channel, subfamily Q, member 2 // potassium voltage-gated channel, subfamily Q, membe…		4	4	coding	12
Kcnq3	potassium voltage-gated channel, subfamily Q, member 3 // potassium voltage-gated channel, subfamily Q, member 3 // potassium voltage-gated channel, subfamily Q, member 3		1	1	coding	6
Kctd9	potassium channel tetramerisation domain containing 9 // potassium channel tetramerisation domain containing 9 // potassium channel tetramerisation domain containing 9 // potassium channel tetramerisation domain containing 9 // potassium channel tetramerisation domain containing 9 // potassium channel tetramerisation domain containing 9 // potassium channel tetramerisation domain containing 9 // …		2	2	coding	12
Kif1a	kinesin family member 1A // kinesin family member 1A // kinesin family member 1A // kinesin family member 1A // kinesin family member 1A // kinesin family member 1A // kinesin family member 1A // kinesin family member 1A // kinesin family member 1A // kinesin family member 1A // kinesin family member 1A // kinesin family member 1A		2	2	coding	30
Kif1b	kinesin family member 1B // kinesin family member 1B // kinesin family member 1B // kinesin family member 1B // kinesin family member 1B // kinesin family member 1B // kinesin family member 1B // kinesin family member 1B // kinesin family member 1B		2	2	coding	12
Kif21a	kinesin family member 21A // kinesin family member 21A // kinesin family member 21A // kinesin family member 21A // kinesin family member 21A // kinesin family member 21A // kinesin family member 21A // kinesin family member 21A // kinesin family member 21A // kinesin family member 21A // kinesin family member 21A // kinesin family member 21A // kinesin family member 21A // kinesin family member …		1	1	coding	30
Kif3c	kinesin family member 3C // kinesin family member 3C // kinesin family member 3C // kinesin family member 3C // kinesin family member 3C // kinesin family member 3C // kinesin family member 3C // kinesin family member 3C // kinesin family member 3C		2	2	coding	3
Kifc2	kinesin family member C2 // kinesin family member C2 // kinesin family member C2 // kinesin family member C2 // kinesin family member C2 // kinesin family member C2		6	5	coding	12
Kirrel3	kin of IRRE like 3 (Drosophila) // kin of IRRE like 3 (Drosophila) // kin of IRRE like 3 (Drosophila) // kin of IRRE like 3 (Drosophila) // kin of IRRE like 3 (Drosophila) // kin of IRRE like 3 (Drosophila)		3	2	coding	6
Klc2	kinesin light chain 2 // kinesin light chain 2 // kinesin light chain 2 // kinesin light chain 2 // kinesin light chain 2 // kinesin light chain 2 // kinesin light chain 2 // kinesin light chain 2 // kinesin light chain 2 // kinesin light chain 2 // kinesin light chain 2 // kinesin light chain 2 // kinesin light chain 2 // kinesin light chain 2 // kinesin light chain 2 // kinesin light chain 2 //…		1	1	coding	3
Klhdc8a	kelch domain containing 8A // kelch domain containing 8A // kelch domain containing 8A // kelch domain containing 8A // kelch domain containing 8A // kelch domain containing 8A		1	1	coding	12
Klhl4	kelch-like 4 (Drosophila) // kelch-like 4 (Drosophila) // kelch-like 4 (Drosophila) // kelch-like 4 (Drosophila) // kelch-like 4 (Drosophila) // kelch-like 4 (Drosophila) // kelch-like 4 (Drosophila) // kelch-like 4 (Drosophila) // kelch-like 4 (Drosophila) // kelch-like 4 (Drosophila) // kelch-like 4 (Drosophila) // kelch-like 4 (Drosophila)		4	3	coding	3
Lamp2	lysosomal-associated membrane protein 2 // lysosomal-associated membrane protein 2 // lysosomal-associated membrane protein 2 // lysosomal-associated membrane protein 2 // lysosomal-associated membrane protein 2 // lysosomal-associated membrane protein 2 // lysosomal-associated membrane protein 2 // lysosomal-associated membrane protein 2		3	2	coding	78
Lancl1	LanC (bacterial lantibiotic synthetase component C)-like 1 // LanC (bacterial lantibiotic synthetase component C)-like 1 // LanC (bacterial lantibiotic synthetase component C)-like 1 // LanC (bacterial lantibiotic synthetase component C)-like 1 // LanC (bacterial lantibiotic synthetase component C)-like 1 // LanC (bacterial lantibiotic synthetase component C)-like 1 // LanC (bacterial lantibiotic…		2	2	coding	6
Lbx1	ladybird homeobox homolog 1 (Drosophila) // ladybird homeobox homolog 1 (Drosophila) // ladybird homeobox homolog 1 (Drosophila) // ladybird homeobox homolog 1 (Drosophila) // ladybird homeobox homolog 1 (Drosophila)		8	4	coding	12
Lcp1	lymphocyte cytosolic protein 1 // lymphocyte cytosolic protein 1 // lymphocyte cytosolic protein 1 // lymphocyte cytosolic protein 1 // lymphocyte cytosolic protein 1 // lymphocyte cytosolic protein 1 // lymphocyte cytosolic protein 1 // lymphocyte cytosolic protein 1 // lymphocyte cytosolic protein 1 // lymphocyte cytosolic protein 1 // lymphocyte cytosolic protein 1 // lymphocyte cytosolic prot…		1	1	coding	78
Ldlr	low density lipoprotein receptor // low density lipoprotein receptor // low density lipoprotein receptor // low density lipoprotein receptor // low density lipoprotein receptor // low density lipoprotein receptor // low density lipoprotein receptor // low density lipoprotein receptor // low density lipoprotein receptor // low density lipoprotein receptor // low density lipoprotein receptor // low…		1	1	coding	12
Ldoc1l	leucine zipper, down-regulated in cancer 1-like // leucine zipper, down-regulated in cancer 1-like // leucine zipper, down-regulated in cancer 1-like // leucine zipper, down-regulated in cancer 1-like // leucine zipper, down-regulated in cancer 1-like		3	3	coding	12
Lgals3	lectin, galactose binding, soluble 3 // lectin, galactose binding, soluble 3 // lectin, galactose binding, soluble 3 // lectin, galactose binding, soluble 3 // lectin, galactose binding, soluble 3 // lectin, galactose binding, soluble 3 // lectin, galactose binding, soluble 3 // lectin, galactose binding, soluble 3 // lectin, galactose binding, soluble 3 // lectin, galactose binding, soluble 3 //…		1	1	coding	67
Lgi2	leucine-rich repeat LGI family, member 2 // leucine-rich repeat LGI family, member 2 // leucine-rich repeat LGI family, member 2 // leucine-rich repeat LGI family, member 2 // leucine-rich repeat LGI family, member 2 // leucine-rich repeat LGI family, member 2 // leucine-rich repeat LGI family, member 2		3	3	coding	6
Lgi3	leucine-rich repeat LGI family, member 3 // leucine-rich repeat LGI family, member 3 // leucine-rich repeat LGI family, member 3 // leucine-rich repeat LGI family, member 3 // leucine-rich repeat LGI family, member 3 // leucine-rich repeat LGI family, member 3		1	1	coding	3
Lhfpl4	lipoma HMGIC fusion partner-like protein 4 // lipoma HMGIC fusion partner-like protein 4 // lipoma HMGIC fusion partner-like protein 4 // lipoma HMGIC fusion partner-like protein 4 // lipoma HMGIC fusion partner-like protein 4 // lipoma HMGIC fusion partner-like protein 4 // lipoma HMGIC fusion partner-like protein 4 // lipoma HMGIC fusion partner-like protein 4		2	2	coding	12
Limk1	LIM-domain containing, protein kinase // LIM-domain containing, protein kinase // LIM-domain containing, protein kinase // LIM-domain containing, protein kinase // LIM-domain containing, protein kinase // LIM-domain containing, protein kinase // LIM-domain containing, protein kinase // LIM-domain containing, protein kinase // LIM-domain containing, protein kinase // LIM-domain containing, protein…		3	3	coding	3
Lin7b	lin-7 homolog B (C. elegans) // lin-7 homolog B (C. elegans) // lin-7 homolog B (C. elegans) // lin-7 homolog B (C. elegans) // lin-7 homolog B (C. elegans) // lin-7 homolog B (C. elegans) // lin-7 homolog B (C. elegans) // lin-7 homolog B (C. elegans) // lin-7 homolog B (C. elegans) // lin-7 homolog B (C. elegans)		2	2	coding	12
Lingo4	leucine rich repeat and Ig domain containing 4 // leucine rich repeat and Ig domain containing 4 // leucine rich repeat and Ig domain containing 4 // leucine rich repeat and Ig domain containing 4 // leucine rich repeat and Ig domain containing 4 // leucine rich repeat and Ig domain containing 4		3	3	coding	6
Lmo3	LIM domain only 3 // LIM domain only 3 // LIM domain only 3		7	6	coding	12
Lnp	limb and neural patterns // limb and neural patterns // limb and neural patterns // limb and neural patterns // limb and neural patterns // limb and neural patterns // limb and neural patterns // limb and neural patterns // limb and neural patterns // limb and neural patterns		2	2	coding	12
Lpcat4	lysophosphatidylcholine acyltransferase 4 // lysophosphatidylcholine acyltransferase 4 // lysophosphatidylcholine acyltransferase 4 // lysophosphatidylcholine acyltransferase 4 // lysophosphatidylcholine acyltransferase 4 // lysophosphatidylcholine acyltransferase 4 // lysophosphatidylcholine acyltransferase 4 // lysophosphatidylcholine acyltransferase 4 // lysophosphatidylcholine acyltransferase…		2	2	coding	6
Lphn1	latrophilin 1 // latrophilin 1 // latrophilin 1 // latrophilin 1 // latrophilin 1 // latrophilin 1 // latrophilin 1 // latrophilin 1 // latrophilin 1 // latrophilin 1 // latrophilin 1 // latrophilin 1 // latrophilin 1		2	2	coding	6
Lphn3	latrophilin 3 // latrophilin 3 // latrophilin 3 // latrophilin 3 // latrophilin 3 // latrophilin 3 // latrophilin 3		3	3	coding	6
Lpxn	leupaxin // leupaxin // leupaxin // leupaxin // leupaxin // leupaxin		1	1	coding	78
Lrfn5	leucine rich repeat and fibronectin type III domain containing 5 // leucine rich repeat and fibronectin type III domain containing 5 // leucine rich repeat and fibronectin type III domain containing 5 // leucine rich repeat and fibronectin type III domain containing 5 // leucine rich repeat and fibronectin type III domain containing 5		7	6	coding	12
Lrp11	low density lipoprotein receptor-related protein 11 // low density lipoprotein receptor-related protein 11 // low density lipoprotein receptor-related protein 11 // low density lipoprotein receptor-related protein 11		1	1	coding	12
Lrp1b	low density lipoprotein-related protein 1B (deleted in tumors) // low density lipoprotein-related protein 1B (deleted in tumors) // low density lipoprotein-related protein 1B (deleted in tumors) // low density lipoprotein-related protein 1B (deleted in tumors) // low density lipoprotein-related protein 1B (deleted in tumors) // low density lipoprotein-related protein 1B (deleted in tumors)		5	4	coding	6
Lrrc4	leucine rich repeat containing 4 // leucine rich repeat containing 4 // leucine rich repeat containing 4		1	1	coding	6
Lrrc49	leucine rich repeat containing 49 // leucine rich repeat containing 49 // leucine rich repeat containing 49 // leucine rich repeat containing 49 // leucine rich repeat containing 49 // leucine rich repeat containing 49 // leucine rich repeat containing 49 // leucine rich repeat containing 49 // leucine rich repeat containing 49		2	2	coding	12
Lrrc4b	leucine rich repeat containing 4B // leucine rich repeat containing 4B // leucine rich repeat containing 4B // leucine rich repeat containing 4B // leucine rich repeat containing 4B // leucine rich repeat containing 4B // leucine rich repeat containing 4B // leucine rich repeat containing 4B		2	2	coding	12
Lrrn1	leucine rich repeat protein 1, neuronal // leucine rich repeat protein 1, neuronal // leucine rich repeat protein 1, neuronal // leucine rich repeat protein 1, neuronal // leucine rich repeat protein 1, neuronal // leucine rich repeat protein 1, neuronal		2	2	coding	3
Lrrn2	leucine rich repeat protein 2, neuronal // leucine rich repeat protein 2, neuronal // leucine rich repeat protein 2, neuronal // leucine rich repeat protein 2, neuronal // leucine rich repeat protein 2, neuronal		1	1	coding	12
Lyn	Yamaguchi sarcoma viral (v-yes-1) oncogene homolog // Yamaguchi sarcoma viral (v-yes-1) oncogene homolog // predicted gene 11787 // Yamaguchi sarcoma viral (v-yes-1) oncogene homolog // Yamaguchi sarcoma viral (v-yes-1) oncogene homolog		1	1	coding	78
Lypd1	Ly6/Plaur domain containing 1 // Ly6/Plaur domain containing 1 // Ly6/Plaur domain containing 1		2	2	coding	12
Lypd6b	LY6/PLAUR domain containing 6B // LY6/PLAUR domain containing 6B // LY6/PLAUR domain containing 6B		1	1	coding	3
Mab21l1	mab-21-like 1 (C. elegans) // mab-21-like 1 (C. elegans) // mab-21-like 1 (C. elegans)		2	2	coding	12
Mab21l2	mab-21-like 2 (C. elegans) // mab-21-like 2 (C. elegans) // mab-21-like 2 (C. elegans)		1	1	coding	12
Macrod2	MACRO domain containing 2 // MACRO domain containing 2 // MACRO domain containing 2		2	2	coding	12
Madd	MAP-kinase activating death domain // MAP-kinase activating death domain // MAP-kinase activating death domain // MAP-kinase activating death domain // MAP-kinase activating death domain // MAP-kinase activating death domain // MAP-kinase activating death domain // MAP-kinase activating death domain // MAP-kinase activating death domain // MAP-kinase activating death domain // MAP-kinase activati…		1	1	coding	12
Mafb	v-maf musculoaponeurotic fibrosarcoma oncogene family, protein B (avian) // v-maf musculoaponeurotic fibrosarcoma oncogene family, protein B (avian) // v-maf musculoaponeurotic fibrosarcoma oncogene family, protein B (avian)		4	3	coding	78
Magee1	melanoma antigen, family E, 1 // melanoma antigen, family E, 1 // melanoma antigen, family E, 1 // melanoma antigen, family E, 1 // melanoma antigen, family E, 1 // melanoma antigen, family E, 1 // melanoma antigen, family E, 1 // melanoma antigen, family E, 1		7	5	coding	12
Magi1	membrane associated guanylate kinase, WW and PDZ domain containing 1 // membrane associated guanylate kinase, WW and PDZ domain containing 1 // membrane associated guanylate kinase, WW and PDZ domain containing 1 // membrane associated guanylate kinase, WW and PDZ domain containing 1 // membrane associated guanylate kinase, WW and PDZ domain containing 1 // membrane associated guanylate kinase, W…		4	3	coding	12
Mal2	mal, T cell differentiation protein 2 // mal, T cell differentiation protein 2 // mal, T cell differentiation protein 2 // mal, T cell differentiation protein 2 // mal, T cell differentiation protein 2		1	1	coding	12
Maneal	mannosidase, endo-alpha-like // mannosidase, endo-alpha-like // mannosidase, endo-alpha-like // mannosidase, endo-alpha-like // mannosidase, endo-alpha-like // mannosidase, endo-alpha-like		2	2	coding	3
Map2k4	mitogen-activated protein kinase kinase 4 // mitogen-activated protein kinase kinase 4 // mitogen-activated protein kinase kinase 4 // mitogen-activated protein kinase kinase 4 // mitogen-activated protein kinase kinase 4 // mitogen-activated protein kinase kinase 4 // mitogen-activated protein kinase kinase 4 // mitogen-activated protein kinase kinase 4 // mitogen-activated protein kinase kinase…		3	3	coding	3
Map3k12	mitogen-activated protein kinase kinase kinase 12 // mitogen-activated protein kinase kinase kinase 12 // mitogen-activated protein kinase kinase kinase 12 // mitogen-activated protein kinase kinase kinase 12 // mitogen-activated protein kinase kinase kinase 12 // mitogen-activated protein kinase kinase kinase 12 // mitogen-activated protein kinase kinase kinase 12 // mitogen-activated protein ki…		1	1	coding	6
Map3k8	mitogen-activated protein kinase kinase kinase 8 // mitogen-activated protein kinase kinase kinase 8 // mitogen-activated protein kinase kinase kinase 8 // mitogen-activated protein kinase kinase kinase 8 // mitogen-activated protein kinase kinase kinase 8 // mitogen-activated protein kinase kinase kinase 8 // mitogen-activated protein kinase kinase kinase 8 // mitogen-activated protein kinase ki…		1	1	coding	78
Map3k9	mitogen-activated protein kinase kinase kinase 9 // mitogen-activated protein kinase kinase kinase 9 // mitogen-activated protein kinase kinase kinase 9 // mitogen-activated protein kinase kinase kinase 9		2	2	coding	3
Map4k2	mitogen-activated protein kinase kinase kinase kinase 2 // mitogen-activated protein kinase kinase kinase kinase 2 // mitogen-activated protein kinase kinase kinase kinase 2 // mitogen-activated protein kinase kinase kinase kinase 2 // mitogen-activated protein kinase kinase kinase kinase 2 // mitogen-activated protein kinase kinase kinase kinase 2 // mitogen-activated protein kinase kinase kinas…		4	3	coding	6
Map6d1	MAP6 domain containing 1 // MAP6 domain containing 1 // MAP6 domain containing 1 // MAP6 domain containing 1 // MAP6 domain containing 1		1	1	coding	6
Mapk10	mitogen-activated protein kinase 10 // mitogen-activated protein kinase 10 // mitogen-activated protein kinase 10 // mitogen-activated protein kinase 10 // mitogen-activated protein kinase 10 // mitogen-activated protein kinase 10		2	2	coding	12
Mapk10	mitogen-activated protein kinase 10 // mitogen-activated protein kinase 10 // mitogen-activated protein kinase 10 // mitogen-activated protein kinase 10 // mitogen-activated protein kinase 10 // mitogen-activated protein kinase 10 // mitogen-activated protein kinase 10		2	2	coding	30
Mapk8ip1	mitogen-activated protein kinase 8 interacting protein 1 // mitogen-activated protein kinase 8 interacting protein 1 // mitogen-activated protein kinase 8 interacting protein 1 // mitogen-activated protein kinase 8 interacting protein 1 // mitogen-activated protein kinase 8 interacting protein 1 // mitogen-activated protein kinase 8 interacting protein 1 // mitogen-activated protein kinase 8 inte…		1	1	coding	30
Mapk8ip2	mitogen-activated protein kinase 8 interacting protein 2 // mitogen-activated protein kinase 8 interacting protein 2 // mitogen-activated protein kinase 8 interacting protein 2 // mitogen-activated protein kinase 8 interacting protein 2 // mitogen-activated protein kinase 8 interacting protein 2 // mitogen-activated protein kinase 8 interacting protein 2		2	2	coding	12
Mapk8ip3	mitogen-activated protein kinase 8 interacting protein 3 // mitogen-activated protein kinase 8 interacting protein 3 // mitogen-activated protein kinase 8 interacting protein 3 // mitogen-activated protein kinase 8 interacting protein 3 // mitogen-activated protein kinase 8 interacting protein 3 // mitogen-activated protein kinase 8 interacting protein 3 // mitogen-activated protein kinase 8 inte…		1	1	coding	30
Mapk9	mitogen-activated protein kinase 9 // mitogen-activated protein kinase 9 // mitogen-activated protein kinase 9 // mitogen-activated protein kinase 9 // mitogen-activated protein kinase 9 // mitogen-activated protein kinase 9 // mitogen-activated protein kinase 9 // mitogen-activated protein kinase 9 // mitogen-activated protein kinase 9 // mitogen-activated protein kinase 9 // mitogen-activated p…		2	2	coding	3
Mapre3	microtubule-associated protein, RP/EB family, member 3 // microtubule-associated protein, RP/EB family, member 3 // microtubule-associated protein, RP/EB family, member 3 // microtubule-associated protein, RP/EB family, member 3 // microtubule-associated protein, RP/EB family, member 3		2	2	coding	12
Mapt	microtubule-associated protein tau // microtubule-associated protein tau // microtubule-associated protein tau // microtubule-associated protein tau // microtubule-associated protein tau // microtubule-associated protein tau // microtubule-associated protein tau // microtubule-associated protein tau // microtubule-associated protein tau // microtubule-associated protein tau		4	4	coding	6
Mark1	MAP/microtubule affinity-regulating kinase 1 // MAP/microtubule affinity-regulating kinase 1 // MAP/microtubule affinity-regulating kinase 1 // MAP/microtubule affinity-regulating kinase 1 // MAP/microtubule affinity-regulating kinase 1 // MAP/microtubule affinity-regulating kinase 1		5	4	coding	12
Mast1	microtubule associated serine/threonine kinase 1 // microtubule associated serine/threonine kinase 1 // microtubule associated serine/threonine kinase 1 // microtubule associated serine/threonine kinase 1 // microtubule associated serine/threonine kinase 1 // microtubule associated serine/threonine kinase 1 // microtubule associated serine/threonine kinase 1 // microtubule associated serine/threo…		4	4	coding	12
Mcf2	mcf.2 transforming sequence // mcf.2 transforming sequence // mcf.2 transforming sequence // mcf.2 transforming sequence // mcf.2 transforming sequence // mcf.2 transforming sequence // mcf.2 transforming sequence // mcf.2 transforming sequence // mcf.2 transforming sequence // mcf.2 transforming sequence // mcf.2 transforming sequence // mcf.2 transforming sequence // mcf.2 transforming sequence…		4	4	coding	12
Mcf2l	mcf.2 transforming sequence-like // mcf.2 transforming sequence-like // mcf.2 transforming sequence-like // mcf.2 transforming sequence-like // mcf.2 transforming sequence-like // mcf.2 transforming sequence-like // mcf.2 transforming sequence-like // mcf.2 transforming sequence-like // mcf.2 transforming sequence-like // mcf.2 transforming sequence-like // mcf.2 transforming sequence-like // mcf…		3	2	coding	30
Mcm3	minichromosome maintenance deficient 3 (S. cerevisiae) // minichromosome maintenance deficient 3 (S. cerevisiae) // minichromosome maintenance deficient 3 (S. cerevisiae) // minichromosome maintenance deficient 3 (S. cerevisiae) // minichromosome maintenance deficient 3 (S. cerevisiae) // minichromosome maintenance deficient 3 (S. cerevisiae)		4	3	coding	75
Mdga2	MAM domain containing glycosylphosphatidylinositol anchor 2		7	5	coding	12
Me3	malic enzyme 3, NADP(+)-dependent, mitochondrial // malic enzyme 3, NADP(+)-dependent, mitochondrial		2	2	coding	6
Meg3	maternally expressed 3 // maternally expressed 3		4	4	coding	12
Meis2	Meis homeobox 2 // Meis homeobox 2 // Meis homeobox 2 // Meis homeobox 2 // Meis homeobox 2 // Meis homeobox 2 // Meis homeobox 2 // Meis homeobox 2 // Meis homeobox 2 // Meis homeobox 2 // Meis homeobox 2 // Meis homeobox 2		4	3	coding	6
Mertk	c-mer proto-oncogene tyrosine kinase // c-mer proto-oncogene tyrosine kinase // c-mer proto-oncogene tyrosine kinase // c-mer proto-oncogene tyrosine kinase // c-mer proto-oncogene tyrosine kinase		1	1	coding	78
Mfsd6	major facilitator superfamily domain containing 6 // major facilitator superfamily domain containing 6 // major facilitator superfamily domain containing 6 // major facilitator superfamily domain containing 6 // major facilitator superfamily domain containing 6 // major facilitator superfamily domain containing 6 // major facilitator superfamily domain containing 6		2	2	coding	12
Mgat3	mannoside acetylglucosaminyltransferase 3 // mannoside acetylglucosaminyltransferase 3 // mannoside acetylglucosaminyltransferase 3		3	3	coding	6
Mgat5b	mannoside acetylglucosaminyltransferase 5, isoenzyme B // mannoside acetylglucosaminyltransferase 5, isoenzyme B // mannoside acetylglucosaminyltransferase 5, isoenzyme B // mannoside acetylglucosaminyltransferase 5, isoenzyme B // mannoside acetylglucosaminyltransferase 5, isoenzyme B // mannoside acetylglucosaminyltransferase 5, isoenzyme B // mannoside acetylglucosaminyltransferase 5, isoenzym…		1	1	coding	12
Mmp19	matrix metallopeptidase 19 // matrix metallopeptidase 19 // matrix metallopeptidase 19 // matrix metallopeptidase 19 // matrix metallopeptidase 19 // matrix metallopeptidase 19 // matrix metallopeptidase 19 // matrix metallopeptidase 19		2	2	coding	67
Mmp24	matrix metallopeptidase 24 // matrix metallopeptidase 24 // matrix metallopeptidase 24 // matrix metallopeptidase 24 // matrix metallopeptidase 24 // matrix metallopeptidase 24		2	2	coding	12
Mob1a	MOB kinase activator 1A // MOB kinase activator 1A // MOB kinase activator 1A // MOB kinase activator 1A // MOB kinase activator 1A // MOB kinase activator 1A // MOB kinase activator 1A // MOB kinase activator 1A // MOB kinase activator 1A // MOB kinase activator 1A // MOB kinase activator 1A // MOB kinase activator 1A // MOB kinase activator 1A		1	1	coding	78
Mpp2	membrane protein, palmitoylated 2 (MAGUK p55 subfamily member 2) // membrane protein, palmitoylated 2 (MAGUK p55 subfamily member 2) // membrane protein, palmitoylated 2 (MAGUK p55 subfamily member 2) // membrane protein, palmitoylated 2 (MAGUK p55 subfamily member 2) // membrane protein, palmitoylated 2 (MAGUK p55 subfamily member 2) // membrane protein, palmitoylated 2 (MAGUK p55 subfamily memb…		3	3	coding	12
Mpped1	metallophosphoesterase domain containing 1 // metallophosphoesterase domain containing 1 // metallophosphoesterase domain containing 1 // metallophosphoesterase domain containing 1 // metallophosphoesterase domain containing 1		3	3	coding	12
Ms4a6d	membrane-spanning 4-domains, subfamily A, member 6D // membrane-spanning 4-domains, subfamily A, member 6D // membrane-spanning 4-domains, subfamily A, member 6D // membrane-spanning 4-domains, subfamily A, member 6D // membrane-spanning 4-domains, subfamily A, member 6D // membrane-spanning 4-domains, subfamily A, member 6D // membrane-spanning 4-domains, subfamily A, member 6D // membrane-spann…		2	2	coding	67
Msn	moesin // moesin // moesin // moesin		2	2	coding	67
Msr1	macrophage scavenger receptor 1 // macrophage scavenger receptor 1 // macrophage scavenger receptor 1 // macrophage scavenger receptor 1 // macrophage scavenger receptor 1 // macrophage scavenger receptor 1		2	2	coding	67
Mtap2	microtubule-associated protein 2 // microtubule-associated protein 2 // microtubule-associated protein 2 // microtubule-associated protein 2 // microtubule-associated protein 2 // microtubule-associated protein 2 // microtubule-associated protein 2 // microtubule-associated protein 2		1	1	coding	12
Mtap6	microtubule-associated protein 6 // microtubule-associated protein 6 // microtubule-associated protein 6 // microtubule-associated protein 6 // microtubule-associated protein 6 // microtubule-associated protein 6 // microtubule-associated protein 6 // microtubule-associated protein 6		2	2	coding	30
Mtfp1	mitochondrial fission process 1 // mitochondrial fission process 1 // mitochondrial fission process 1 // mitochondrial fission process 1 // mitochondrial fission process 1 // mitochondrial fission process 1		4	2	coding	12
Mtmr7	myotubularin related protein 7 // myotubularin related protein 7 // myotubularin related protein 7 // myotubularin related protein 7		1	1	coding	3
Mvk	mevalonate kinase // mevalonate kinase // mevalonate kinase // mevalonate kinase // mevalonate kinase // mevalonate kinase // mevalonate kinase // mevalonate kinase // mevalonate kinase // mevalonate kinase		1	1	coding	12
Myd88	myeloid differentiation primary response gene 88 // myeloid differentiation primary response gene 88 // myeloid differentiation primary response gene 88 // myeloid differentiation primary response gene 88 // myeloid differentiation primary response gene 88 // myeloid differentiation primary response gene 88 // myeloid differentiation primary response gene 88 // myeloid differentiation primary res…		2	1	coding	67
Myo1c	myosin IC // myosin IC // myosin IC // myosin IC // myosin IC // myosin IC // myosin IC // myosin IC // myosin IC // myosin IC // myosin IC // myosin IC // myosin IC // myosin IC // myosin IC // myosin IC // myosin IC // myosin IC // myosin IC // myosin IC // myosin IC		1	1	coding	78
Myrip	myosin VIIA and Rab interacting protein // myosin VIIA and Rab interacting protein // myosin VIIA and Rab interacting protein		3	3	coding	12
Myt1l	myelin transcription factor 1-like // myelin transcription factor 1-like // myelin transcription factor 1-like // myelin transcription factor 1-like // myelin transcription factor 1-like // myelin transcription factor 1-like // myelin transcription factor 1-like		1	1	coding	12
n268066	| AK087482 | mRNAlike lncRNA | Mus musculus | Mouse noncoding transcript | FANTOM3 | E130304M04 | http://fantom3.gsc.riken.jp/db/annotate/main.cgi?masterid=E130304M04 | 1.1512600 | -0.2510009	NOCODE3.0	6	3	non-coding	6
n274811	| AK163850 | mRNAlike lncRNA | Mus musculus | Mouse noncoding transcript | FANTOM3 | C130082M19 | http://fantom3.gsc.riken.jp/db/annotate/main.cgi?masterid=C130082M19 | -1.3647900 | -0.5006031	NOCODE3.0	21	4	non-coding	6
n275269	| AK048233 | mRNAlike lncRNA | Mus musculus | Mouse noncoding transcript | FANTOM3 | C130041N12 | http://fantom3.gsc.riken.jp/db/annotate/main.cgi?masterid=C130041N12 | -1.0951600 | -0.4221910	NOCODE3.0	1	1	non-coding	12
n279396	| AK043227 | mRNAlike lncRNA | Mus musculus | Mouse noncoding transcript | FANTOM3 | A730072G01 | http://fantom3.gsc.riken.jp/db/annotate/main.cgi?masterid=A730072G01 | 0.7701540 | -0.1593511	NOCODE3.0	12	3	non-coding	6
N28178	expressed sequence N28178 // expressed sequence N28178 // expressed sequence N28178 // expressed sequence N28178 // expressed sequence N28178 // expressed sequence N28178 // expressed sequence N28178 // expressed sequence N28178 // expressed sequence N28178 // expressed sequence N28178 // expressed sequence N28178 // expressed sequence N28178		3	3	coding	12
n286573	| AK034145 | mRNAlike lncRNA | Mus musculus | Mouse noncoding transcript | FANTOM3 | 9330159J16 | http://fantom3.gsc.riken.jp/db/annotate/main.cgi?masterid=9330159J16 | 2.8568600 | -0.2893311	NOCODE3.0	2	1	non-coding	12
n344427	| NULL | lincRNA | Mus musculus | mouse lincRNA | Scripture Reconstruction LincRNAs By Guttman | linc1354 | NULL | -1.2964600 | -0.1212613	NOCODE3.0	1	1	non-coding	12
n414332	| NR_027838 | lncRNA | Mus musculus | | RefGeneNoncode | NR_027838 | | 15.5460000 | -0.1925824	NOCODE3.0	12	2	non-coding	30
Nalcn	sodium leak channel, non-selective // sodium leak channel, non-selective // sodium leak channel, non-selective // sodium leak channel, non-selective // sodium leak channel, non-selective		2	2	coding	6
Nap1l3	nucleosome assembly protein 1-like 3 // nucleosome assembly protein 1-like 3 // nucleosome assembly protein 1-like 3 // nucleosome assembly protein 1-like 3 // nucleosome assembly protein 1-like 3 // nucleosome assembly protein 1-like 3		3	3	coding	6
Napg	N-ethylmaleimide sensitive fusion protein attachment protein gamma // N-ethylmaleimide sensitive fusion protein attachment protein gamma // N-ethylmaleimide sensitive fusion protein attachment protein gamma // N-ethylmaleimide sensitive fusion protein attachment protein gamma // N-ethylmaleimide sensitive fusion protein attachment protein gamma		4	3	coding	12
Nat8l	N-acetyltransferase 8-like // N-acetyltransferase 8-like // N-acetyltransferase 8-like // N-acetyltransferase 8-like // N-acetyltransferase 8-like // N-acetyltransferase 8-like		1	1	coding	30
Ncdn	neurochondrin // neurochondrin // neurochondrin // neurochondrin // neurochondrin // neurochondrin // neurochondrin // neurochondrin		1	1	coding	30
Ncf4	neutrophil cytosolic factor 4 // neutrophil cytosolic factor 4 // neutrophil cytosolic factor 4 // neutrophil cytosolic factor 4 // neutrophil cytosolic factor 4 // neutrophil cytosolic factor 4 // neutrophil cytosolic factor 4 // neutrophil cytosolic factor 4 // neutrophil cytosolic factor 4 // neutrophil cytosolic factor 4 // neutrophil cytosolic factor 4 // neutrophil cytosolic factor 4 // neu…		2	2	coding	78
Nckipsd	NCK interacting protein with SH3 domain // NCK interacting protein with SH3 domain // NCK interacting protein with SH3 domain // NCK interacting protein with SH3 domain // NCK interacting protein with SH3 domain // NCK interacting protein with SH3 domain		2	2	coding	12
Ncoa7	nuclear receptor coactivator 7 // nuclear receptor coactivator 7 // nuclear receptor coactivator 7		3	3	coding	12
Ncrna00086	non-protein coding RNA 86 // non-protein coding RNA 86 // non-protein coding RNA 86 // non-protein coding RNA 86		3	3	coding	6
Ndn	necdin // necdin // necdin // necdin // necdin // necdin		1	1	coding	12
Ndrg3	N-myc downstream regulated gene 3 // N-myc downstream regulated gene 3 // N-myc downstream regulated gene 3 // N-myc downstream regulated gene 3 // N-myc downstream regulated gene 3		4	3	coding	6
Ndrg4	N-myc downstream regulated gene 4 // N-myc downstream regulated gene 4 // N-myc downstream regulated gene 4 // N-myc downstream regulated gene 4 // N-myc downstream regulated gene 4 // N-myc downstream regulated gene 4 // N-myc downstream regulated gene 4 // N-myc downstream regulated gene 4 // N-myc downstream regulated gene 4 // N-myc downstream regulated gene 4		1	1	coding	30
Ndst4	N-deacetylase/N-sulfotransferase (heparin glucosaminyl) 4 // N-deacetylase/N-sulfotransferase (heparin glucosaminyl) 4 // N-deacetylase/N-sulfotransferase (heparin glucosaminyl) 4 // N-deacetylase/N-sulfotransferase (heparin glucosaminyl) 4		1	1	coding	6
Necab1	N-terminal EF-hand calcium binding protein 1 // N-terminal EF-hand calcium binding protein 1 // N-terminal EF-hand calcium binding protein 1 // N-terminal EF-hand calcium binding protein 1		3	3	coding	12
Necab3	N-terminal EF-hand calcium binding protein 3 // N-terminal EF-hand calcium binding protein 3 // N-terminal EF-hand calcium binding protein 3 // N-terminal EF-hand calcium binding protein 3 // N-terminal EF-hand calcium binding protein 3 // N-terminal EF-hand calcium binding protein 3 // N-terminal EF-hand calcium binding protein 3 // N-terminal EF-hand calcium binding protein 3 // N-terminal EF-h…		3	3	coding	12
Necap1	NECAP endocytosis associated 1 // NECAP endocytosis associated 1 // NECAP endocytosis associated 1 // NECAP endocytosis associated 1 // NECAP endocytosis associated 1 // NECAP endocytosis associated 1 // NECAP endocytosis associated 1		3	3	coding	3
Nefm	neurofilament, medium polypeptide // neurofilament, medium polypeptide // neurofilament, medium polypeptide // neurofilament, medium polypeptide // neurofilament, medium polypeptide // neurofilament, medium polypeptide		4	3	coding	30
Nek6	NIMA (never in mitosis gene a)-related expressed kinase 6 // NIMA (never in mitosis gene a)-related expressed kinase 6 // NIMA (never in mitosis gene a)-related expressed kinase 6 // NIMA (never in mitosis gene a)-related expressed kinase 6 // NIMA (never in mitosis gene a)-related expressed kinase 6 // NIMA (never in mitosis gene a)-related expressed kinase 6		4	3	coding	67
Nell2	NEL-like 2 (chicken) // NEL-like 2 (chicken) // NEL-like 2 (chicken) // NEL-like 2 (chicken) // NEL-like 2 (chicken)		4	4	coding	6
Nfya	nuclear transcription factor-Y alpha // nuclear transcription factor-Y alpha // nuclear transcription factor-Y alpha // nuclear transcription factor-Y alpha // nuclear transcription factor-Y alpha // nuclear transcription factor-Y alpha // nuclear transcription factor-Y alpha // nuclear transcription factor-Y alpha // nuclear transcription factor-Y alpha // nuclear transcription factor-Y alpha //…		1	1	coding	51
Nhlrc3	NHL repeat containing 3 // NHL repeat containing 3 // NHL repeat containing 3 // NHL repeat containing 3 // NHL repeat containing 3 // NHL repeat containing 3 // NHL repeat containing 3 // NHL repeat containing 3		2	2	coding	78
Nipa1	non imprinted in Prader-Willi/Angelman syndrome 1 homolog (human) // non imprinted in Prader-Willi/Angelman syndrome 1 homolog (human) // non imprinted in Prader-Willi/Angelman syndrome 1 homolog (human)		1	1	coding	6
Nkd1	naked cuticle 1 homolog (Drosophila) // naked cuticle 1 homolog (Drosophila) // naked cuticle 1 homolog (Drosophila) // naked cuticle 1 homolog (Drosophila) // naked cuticle 1 homolog (Drosophila)		3	2	coding	6
Nkiras1	NFKB inhibitor interacting Ras-like protein 1 // NFKB inhibitor interacting Ras-like protein 1 // NFKB inhibitor interacting Ras-like protein 1 // NFKB inhibitor interacting Ras-like protein 1 // NFKB inhibitor interacting Ras-like protein 1 // NFKB inhibitor interacting Ras-like protein 1 // NFKB inhibitor interacting Ras-like protein 1 // NFKB inhibitor interacting Ras-like protein 1 // NFKB in…		1	1	coding	3
Nlgn3	neuroligin 3 // neuroligin 3 // neuroligin 3 // neuroligin 3 // neuroligin 3		1	1	coding	6
Nol4	nucleolar protein 4 // nucleolar protein 4 // nucleolar protein 4 // nucleolar protein 4 // nucleolar protein 4 // nucleolar protein 4		3	3	coding	12
NONMMUT000228	| AK082172 | mRNAlike lncRNA | Mus musculus | Mouse noncoding transcript | FANTOM3 | C230017F14 | http://fantom3.gsc.riken.jp/db/annotate/main.cgi?masterid=C230017F14 | -1.5906100 | -0.3019023	NOCODE4.0	34	4	non-coding	12
NONMMUT000399	| AK042543 | mRNAlike lncRNA | Mus musculus | Mouse noncoding transcript | FANTOM3 | A730003G23 | http://fantom3.gsc.riken.jp/db/annotate/main.cgi?masterid=A730003G23 | -1.2971400 | -0.3225212	NOCODE4.0	6	3	non-coding	6
NONMMUT001250	| AK083458 | mRNAlike lncRNA | Mus musculus | Mouse noncoding transcript | FANTOM3 | D030020C12 | http://fantom3.gsc.riken.jp/db/annotate/main.cgi?masterid=D030020C12 | 1.9899600 | -0.2818354	NOCODE4.0	3	2	non-coding	6
NONMMUT001279	| AK013046 | mRNAlike lncRNA | Mus musculus | Mouse noncoding transcript | FANTOM3 | 2810408I11 | http://fantom3.gsc.riken.jp/db/annotate/main.cgi?masterid=2810408I11 | 0.7088270 | -0.2570232	NOCODE4.0	10	3	non-coding	69
NONMMUT001312	| AK047690 | mRNAlike lncRNA | Mus musculus | Mouse noncoding transcript | FANTOM3 | C030011F20 | http://fantom3.gsc.riken.jp/db/annotate/main.cgi?masterid=C030011F20 | -0.1835280 | -0.3455770	NOCODE4.0	12	4	non-coding	6
NONMMUT001318	| AK021165 | mRNAlike lncRNA | Mus musculus | Mouse noncoding transcript | FANTOM3 | C230061B10 | http://fantom3.gsc.riken.jp/db/annotate/main.cgi?masterid=C230061B10 | -1.5906100 | -0.2409143	NOCODE4.0	49	6	non-coding	3
NONMMUT002429	| AK043935 | mRNAlike lncRNA | Mus musculus | Mouse noncoding transcript | FANTOM3 | A830054G08 | http://fantom3.gsc.riken.jp/db/annotate/main.cgi?masterid=A830054G08 | -1.0319500 | -0.3371704	NOCODE4.0	26	5	non-coding	30
NONMMUT004126	| AK047804 | mRNAlike lncRNA | Mus musculus | Mouse noncoding transcript | FANTOM3 | C030047B02 | http://fantom3.gsc.riken.jp/db/annotate/main.cgi?masterid=C030047B02 | 1.8733300 | -0.2893231	NOCODE4.0	1	1	non-coding	15
NONMMUT004432	| AK047918 | mRNAlike lncRNA | Mus musculus | Mouse noncoding transcript | FANTOM3 | C130021L12 | http://fantom3.gsc.riken.jp/db/annotate/main.cgi?masterid=C130021L12 | -1.5906100 | -0.3591355	NOCODE4.0	5	2	non-coding	6
NONMMUT004524	| AK047671 | mRNAlike lncRNA | Mus musculus | Mouse noncoding transcript | FANTOM3 | C030008K18 | http://fantom3.gsc.riken.jp/db/annotate/main.cgi?masterid=C030008K18 | -1.1957600 | -0.3319598	NOCODE4.0	8	3	non-coding	6
NONMMUT004848	| AK047584 | mRNAlike lncRNA | Mus musculus | Mouse noncoding transcript | FANTOM3 | B930094H20 | http://fantom3.gsc.riken.jp/db/annotate/main.cgi?masterid=B930094H20 | -1.1543700 | -0.3908967	NOCODE4.0	4	3	non-coding	12
NONMMUT005138	| AK047524 | mRNAlike lncRNA | Mus musculus | Mouse noncoding transcript | FANTOM3 | B930083D02 | http://fantom3.gsc.riken.jp/db/annotate/main.cgi?masterid=B930083D02 | -1.2533900 | -0.3296135	NOCODE4.0	5	3	non-coding	12
NONMMUT005432	| AK035573 | mRNAlike lncRNA | Mus musculus | Mouse noncoding transcript | FANTOM3 | 9530068M01 | http://fantom3.gsc.riken.jp/db/annotate/main.cgi?masterid=9530068M01 | -0.0989291 | -0.1684125	NOCODE4.0	11	2	non-coding	78
NONMMUT005544	| AK140157 | mRNAlike lncRNA | Mus musculus | Mouse noncoding transcript | FANTOM3 | B230316O19 | http://fantom3.gsc.riken.jp/db/annotate/main.cgi?masterid=B230316O19 | 1.1777800 | -0.2467581	NOCODE4.0	3	2	non-coding	12
NONMMUT005549	| AK153756 | mRNAlike lncRNA | Mus musculus | Mouse noncoding transcript | FANTOM3 | A630076G06 | http://fantom3.gsc.riken.jp/db/annotate/main.cgi?masterid=A630076G06 | 0.3774900 | -0.3332850	NOCODE4.0	17	3	non-coding	6
NONMMUT005924	| AK047266 | mRNAlike lncRNA | Mus musculus | Mouse noncoding transcript | FANTOM3 | B930044F08 | http://fantom3.gsc.riken.jp/db/annotate/main.cgi?masterid=B930044F08 | -1.1182500 | -0.3577290	NOCODE4.0	2	2	non-coding	12
NONMMUT006523	| AK085181 | mRNAlike lncRNA | Mus musculus | Mouse noncoding transcript | FANTOM3 | D430050E20 | http://fantom3.gsc.riken.jp/db/annotate/main.cgi?masterid=D430050E20 | -1.1449200 | -0.1341709	NOCODE4.0	4	3	non-coding	6
NONMMUT006571	| AK140745 | mRNAlike lncRNA | Mus musculus | Mouse noncoding transcript | FANTOM3 | C130001F24 | http://fantom3.gsc.riken.jp/db/annotate/main.cgi?masterid=C130001F24 | -0.1411270 | -0.4029148	NOCODE4.0	3	2	non-coding	69
NONMMUT007331	| AK038260 | mRNAlike lncRNA | Mus musculus | Mouse noncoding transcript | FANTOM3 | A130090P07 | http://fantom3.gsc.riken.jp/db/annotate/main.cgi?masterid=A130090P07 | -0.2519180 | -0.3332567	NOCODE4.0	28	5	non-coding	66
NONMMUT007967	| AK037621 | mRNAlike lncRNA | Mus musculus | Mouse noncoding transcript | FANTOM3 | A130030B15 | http://fantom3.gsc.riken.jp/db/annotate/main.cgi?masterid=A130030B15 | 1.2863000 | -0.2920747	NOCODE4.0	27	4	non-coding	12
NONMMUT008131	| AK087033 | mRNAlike lncRNA | Mus musculus | Mouse noncoding transcript | FANTOM3 | E030022B18 | http://fantom3.gsc.riken.jp/db/annotate/main.cgi?masterid=E030022B18 | -0.9295660 | -0.2517593	NOCODE4.0	3	2	non-coding	66
NONMMUT009104	| AK136783 | mRNAlike lncRNA | Mus musculus | Mouse noncoding transcript | FANTOM3 | 9330011N05 | http://fantom3.gsc.riken.jp/db/annotate/main.cgi?masterid=9330011N05 | -0.1926690 | -0.3524314	NOCODE4.0	4	1	non-coding	12
NONMMUT009297	| AK138555 | mRNAlike lncRNA | Mus musculus | Mouse noncoding transcript | FANTOM3 | A330062J22 | http://fantom3.gsc.riken.jp/db/annotate/main.cgi?masterid=A330062J22 | -1.4847500 | -0.3150002	NOCODE4.0	7	4	non-coding	14
NONMMUT009312	| AK049941 | mRNAlike lncRNA | Mus musculus | Mouse noncoding transcript | FANTOM3 | C630013G10 | http://fantom3.gsc.riken.jp/db/annotate/main.cgi?masterid=C630013G10 | -1.5906100 | -0.3609475	NOCODE4.0	4	2	non-coding	12
NONMMUT009579	| AK049060 | mRNAlike lncRNA | Mus musculus | Mouse noncoding transcript | FANTOM3 | C230096B09 | http://fantom3.gsc.riken.jp/db/annotate/main.cgi?masterid=C230096B09 | -0.0095019 | -0.2313069	NOCODE4.0	19	3	non-coding	3
NONMMUT009579	| AK049060 | mRNAlike lncRNA | Mus musculus | Mouse noncoding transcript | FANTOM3 | C230096B09 | http://fantom3.gsc.riken.jp/db/annotate/main.cgi?masterid=C230096B09 | -0.0095019 | -0.2313069	NOCODE4.0	19	3	non-coding	6
NONMMUT009847	| AK140080 | mRNAlike lncRNA | Mus musculus | Mouse noncoding transcript | FANTOM3 | B230207H11 | http://fantom3.gsc.riken.jp/db/annotate/main.cgi?masterid=B230207H11 | -1.0607600 | -0.2520711	NOCODE4.0	34	3	non-coding	30
NONMMUT009850	| AK045685 | mRNAlike lncRNA | Mus musculus | Mouse noncoding transcript | FANTOM3 | B230304A20 | http://fantom3.gsc.riken.jp/db/annotate/main.cgi?masterid=B230304A20 | -1.1950000 | -0.1911762	NOCODE4.0	67	3	non-coding	3
NONMMUT009850	| AK045685 | mRNAlike lncRNA | Mus musculus | Mouse noncoding transcript | FANTOM3 | B230304A20 | http://fantom3.gsc.riken.jp/db/annotate/main.cgi?masterid=B230304A20 | -1.1950000 | -0.1911762	NOCODE4.0	67	3	non-coding	12
NONMMUT010478	| AK079164 | mRNAlike lncRNA | Mus musculus | Mouse noncoding transcript | FANTOM3 | 9430095G12 | http://fantom3.gsc.riken.jp/db/annotate/main.cgi?masterid=9430095G12 | 0.2073200 | -0.2559288	NOCODE4.0	4	3	non-coding	12
NONMMUT011045	| AK047648 | mRNAlike lncRNA | Mus musculus | Mouse noncoding transcript | FANTOM3 | C030004L23 | http://fantom3.gsc.riken.jp/db/annotate/main.cgi?masterid=C030004L23 | -0.7779060 | -0.2454863	NOCODE4.0	16	3	non-coding	12
NONMMUT011837	| AK138289 | mRNAlike lncRNA | Mus musculus | Mouse noncoding transcript | FANTOM3 | A230057H20 | http://fantom3.gsc.riken.jp/db/annotate/main.cgi?masterid=A230057H20 | -1.3353300 | -0.3316865	NOCODE4.0	15	3	non-coding	12
NONMMUT012277	| AK083403 | mRNAlike lncRNA | Mus musculus | Mouse noncoding transcript | FANTOM3 | D030002E05 | http://fantom3.gsc.riken.jp/db/annotate/main.cgi?masterid=D030002E05 | -1.3138100 | -0.4152058	NOCODE4.0	18	3	non-coding	78
NONMMUT012808	| AK140030 | mRNAlike lncRNA | Mus musculus | Mouse noncoding transcript | FANTOM3 | B230104J03 | http://fantom3.gsc.riken.jp/db/annotate/main.cgi?masterid=B230104J03 | -0.9122500 | -0.2046016	NOCODE4.0	6	3	non-coding	6
NONMMUT013797	| AK048225 | mRNAlike lncRNA | Mus musculus | Mouse noncoding transcript | FANTOM3 | C130041D09 | http://fantom3.gsc.riken.jp/db/annotate/main.cgi?masterid=C130041D09 | -1.1593200 | -0.3703033	NOCODE4.0	5	3	non-coding	75
NONMMUT014102	| AK034178 | mRNAlike lncRNA | Mus musculus | Mouse noncoding transcript | FANTOM3 | 9330161H23 | http://fantom3.gsc.riken.jp/db/annotate/main.cgi?masterid=9330161H23 | -0.2204680 | -0.4425668	NOCODE4.0	9	3	non-coding	12
NONMMUT014378	| AK140946 | mRNAlike lncRNA | Mus musculus | Mouse noncoding transcript | FANTOM3 | C130078A14 | http://fantom3.gsc.riken.jp/db/annotate/main.cgi?masterid=C130078A14 | 1.1213100 | -0.4003805	NOCODE4.0	12	3	non-coding	12
NONMMUT014670	| AK034056 | mRNAlike lncRNA | Mus musculus | Mouse noncoding transcript | FANTOM3 | 9330152C01 | http://fantom3.gsc.riken.jp/db/annotate/main.cgi?masterid=9330152C01 | 0.1113050 | -0.3783809	NOCODE4.0	2	2	non-coding	6
NONMMUT014671	| AK083633 | mRNAlike lncRNA | Mus musculus | Mouse noncoding transcript | FANTOM3 | D030056M23 | http://fantom3.gsc.riken.jp/db/annotate/main.cgi?masterid=D030056M23 | -1.3258600 | -0.3936076	NOCODE4.0	1	1	non-coding	3
NONMMUT014775	| AK053256 | mRNAlike lncRNA | Mus musculus | Mouse noncoding transcript | FANTOM3 | E130002L11 | http://fantom3.gsc.riken.jp/db/annotate/main.cgi?masterid=E130002L11 | 0.0356261 | -0.2747210	NOCODE4.0	7	3	non-coding	12
NONMMUT014958	| AK047529 | mRNAlike lncRNA | Mus musculus | Mouse noncoding transcript | FANTOM3 | B930083M08 | http://fantom3.gsc.riken.jp/db/annotate/main.cgi?masterid=B930083M08 | -1.0035500 | -0.2104084	NOCODE4.0	6	4	non-coding	6
NONMMUT014958	| AK047529 | mRNAlike lncRNA | Mus musculus | Mouse noncoding transcript | FANTOM3 | B930083M08 | http://fantom3.gsc.riken.jp/db/annotate/main.cgi?masterid=B930083M08 | -1.0035500 | -0.2104084	NOCODE4.0	6	4	non-coding	12
NONMMUT015202	| AK082266 | mRNAlike lncRNA | Mus musculus | Mouse noncoding transcript | FANTOM3 | C230031E17 | http://fantom3.gsc.riken.jp/db/annotate/main.cgi?masterid=C230031E17 | -1.2062500 | -0.3937073	NOCODE4.0	9	2	non-coding	12
NONMMUT015949	| AK045897 | mRNAlike lncRNA | Mus musculus | Mouse noncoding transcript | FANTOM3 | B230319I17 | http://fantom3.gsc.riken.jp/db/annotate/main.cgi?masterid=B230319I17 | -0.9762050 | -0.2445705	NOCODE4.0	1	1	non-coding	12
NONMMUT016061	| NULL | lncRNA | Mus musculus | | UCSCGeneNoncode | uc007pgs.1 | | 1.0976600 | -0.2502392	NOCODE4.0	4	3	non-coding	6
NONMMUT016268	| AK043676 | mRNAlike lncRNA | Mus musculus | Mouse noncoding transcript | FANTOM3 | A830019C02 | http://fantom3.gsc.riken.jp/db/annotate/main.cgi?masterid=A830019C02 | 0.3324940 | -0.2496006	NOCODE4.0	3	3	non-coding	12
NONMMUT017064	| AK042092 | mRNAlike lncRNA | Mus musculus | Mouse noncoding transcript | FANTOM3 | A630057J07 | http://fantom3.gsc.riken.jp/db/annotate/main.cgi?masterid=A630057J07 | 0.0076948 | -0.2762025	NOCODE4.0	3	2	non-coding	69
NONMMUT018492	| AK043655 | mRNAlike lncRNA | Mus musculus | Mouse noncoding transcript | FANTOM3 | A830015L05 | http://fantom3.gsc.riken.jp/db/annotate/main.cgi?masterid=A830015L05 | -1.2478200 | -0.3998195	NOCODE4.0	5	3	non-coding	69
NONMMUT018743	| AK033165 | mRNAlike lncRNA | Mus musculus | Mouse noncoding transcript | FANTOM3 | 8030450I20 | http://fantom3.gsc.riken.jp/db/annotate/main.cgi?masterid=8030450I20 | -0.1233660 | -0.3508274	NOCODE4.0	7	3	non-coding	6
NONMMUT019670	| AK039493 | mRNAlike lncRNA | Mus musculus | Mouse noncoding transcript | FANTOM3 | A330050D14 | http://fantom3.gsc.riken.jp/db/annotate/main.cgi?masterid=A330050D14 | -1.2414400 | -0.3537672	NOCODE4.0	9	3	non-coding	12
NONMMUT019913	| AK081317 | mRNAlike lncRNA | Mus musculus | Mouse noncoding transcript | FANTOM3 | C130004N09 | http://fantom3.gsc.riken.jp/db/annotate/main.cgi?masterid=C130004N09 | -0.2688040 | -0.2992953	NOCODE4.0	7	3	non-coding	75
NONMMUT020189	| AK037870 | mRNAlike lncRNA | Mus musculus | Mouse noncoding transcript | FANTOM3 | A130057H05 | http://fantom3.gsc.riken.jp/db/annotate/main.cgi?masterid=A130057H05 | -0.8801940 | -0.2704702	NOCODE4.0	24	3	non-coding	6
NONMMUT020411	| AK020396 | mRNAlike lncRNA | Mus musculus | Mouse noncoding transcript | FANTOM3 | 9330199C07 | http://fantom3.gsc.riken.jp/db/annotate/main.cgi?masterid=9330199C07 | -0.9374110 | -0.4115764	NOCODE4.0	16	6	non-coding	12
NONMMUT020425	| AK048004 | mRNAlike lncRNA | Mus musculus | Mouse noncoding transcript | FANTOM3 | C130029F03 | http://fantom3.gsc.riken.jp/db/annotate/main.cgi?masterid=C130029F03 | 1.8974400 | -0.3366377	NOCODE4.0	1	1	non-coding	12
NONMMUT020427	| AK141035 | mRNAlike lncRNA | Mus musculus | Mouse noncoding transcript | FANTOM3 | C230011F03 | http://fantom3.gsc.riken.jp/db/annotate/main.cgi?masterid=C230011F03 | 0.0983570 | -0.3650287	NOCODE4.0	4	3	non-coding	12
NONMMUT020707	| AK087604 | mRNAlike lncRNA | Mus musculus | Mouse noncoding transcript | FANTOM3 | E230023M02 | http://fantom3.gsc.riken.jp/db/annotate/main.cgi?masterid=E230023M02 | -1.2657900 | -0.3502312	NOCODE4.0	4	2	non-coding	6
NONMMUT021181	| AK033134 | mRNAlike lncRNA | Mus musculus | Mouse noncoding transcript | FANTOM3 | 8030444F19 | http://fantom3.gsc.riken.jp/db/annotate/main.cgi?masterid=8030444F19 | 0.3577570 | -0.4451306	NOCODE4.0	12	3	non-coding	78
NONMMUT021286	| AK048830 | mRNAlike lncRNA | Mus musculus | Mouse noncoding transcript | FANTOM3 | C230073K07 | http://fantom3.gsc.riken.jp/db/annotate/main.cgi?masterid=C230073K07 | -1.2352600 | -0.2025061	NOCODE4.0	40	6	non-coding	12
NONMMUT021734	| AK013526 | mRNAlike lncRNA | Mus musculus | Mouse noncoding transcript | FANTOM3 | 2900011G08 | http://fantom3.gsc.riken.jp/db/annotate/main.cgi?masterid=2900011G08 | -0.9916650 | -0.2877852	NOCODE4.0	11	3	non-coding	3
NONMMUT021910	| AK049079 | mRNAlike lncRNA | Mus musculus | Mouse noncoding transcript | FANTOM3 | C230097E05 | http://fantom3.gsc.riken.jp/db/annotate/main.cgi?masterid=C230097E05 | -0.2112820 | -0.3507555	NOCODE4.0	11	2	non-coding	12
NONMMUT021913	| AK079079 | mRNAlike lncRNA | Mus musculus | Mouse noncoding transcript | FANTOM3 | 9330159K08 | http://fantom3.gsc.riken.jp/db/annotate/main.cgi?masterid=9330159K08 | -0.6367810 | -0.3340497	NOCODE4.0	10	4	non-coding	12
NONMMUT021926	| AK034162 | mRNAlike lncRNA | Mus musculus | Mouse noncoding transcript | FANTOM3 | 9330160L24 | http://fantom3.gsc.riken.jp/db/annotate/main.cgi?masterid=9330160L24 | -1.3560100 | -0.4286736	NOCODE4.0	11	3	non-coding	12
NONMMUT021928	| AK049797 | mRNAlike lncRNA | Mus musculus | Mouse noncoding transcript | FANTOM3 | C530050I23 | http://fantom3.gsc.riken.jp/db/annotate/main.cgi?masterid=C530050I23 | -1.2396100 | -0.4225715	NOCODE4.0	14	3	non-coding	3
NONMMUT021928	| AK049797 | mRNAlike lncRNA | Mus musculus | Mouse noncoding transcript | FANTOM3 | C530050I23 | http://fantom3.gsc.riken.jp/db/annotate/main.cgi?masterid=C530050I23 | -1.2396100 | -0.4225715	NOCODE4.0	14	3	non-coding	12
NONMMUT022571	| AK136895 | mRNAlike lncRNA | Mus musculus | Mouse noncoding transcript | FANTOM3 | 9330171C04 | http://fantom3.gsc.riken.jp/db/annotate/main.cgi?masterid=9330171C04 | 1.1186300 | -0.3531256	NOCODE4.0	8	4	non-coding	12
NONMMUT022574	| AK032450 | mRNAlike lncRNA | Mus musculus | Mouse noncoding transcript | FANTOM3 | 6430549F20 | http://fantom3.gsc.riken.jp/db/annotate/main.cgi?masterid=6430549F20 | -1.0841500 | -0.3850503	NOCODE4.0	10	3	non-coding	12
NONMMUT022574	| AK032450 | mRNAlike lncRNA | Mus musculus | Mouse noncoding transcript | FANTOM3 | 6430549F20 | http://fantom3.gsc.riken.jp/db/annotate/main.cgi?masterid=6430549F20 | -1.0841500 | -0.3850503	NOCODE4.0	10	3	non-coding	15
NONMMUT023381	| AK013658 | mRNAlike lncRNA | Mus musculus | Mouse noncoding transcript | FANTOM3 | 2900046L07 | http://fantom3.gsc.riken.jp/db/annotate/main.cgi?masterid=2900046L07 | -1.1800600 | -0.3195234	NOCODE4.0	2	1	non-coding	6
NONMMUT023382	| AK034004 | mRNAlike lncRNA | Mus musculus | Mouse noncoding transcript | FANTOM3 | 9330137I21 | http://fantom3.gsc.riken.jp/db/annotate/main.cgi?masterid=9330137I21 | -1.0973100 | -0.3611531	NOCODE4.0	5	3	non-coding	12
NONMMUT023388	| AK010129 | mRNAlike lncRNA | Mus musculus | Mouse noncoding transcript | FANTOM3 | 2310069G16 | http://fantom3.gsc.riken.jp/db/annotate/main.cgi?masterid=2310069G16 | -1.5906100 | -0.3000647	NOCODE4.0	4	2	non-coding	6
NONMMUT023864	| AK043599 | mRNAlike lncRNA | Mus musculus | Mouse noncoding transcript | FANTOM3 | A830011J18 | http://fantom3.gsc.riken.jp/db/annotate/main.cgi?masterid=A830011J18 | -1.0378800 | -0.1561391	NOCODE4.0	12	3	non-coding	3
NONMMUT023865	| AK039650 | mRNAlike lncRNA | Mus musculus | Mouse noncoding transcript | FANTOM3 | A330077P12 | http://fantom3.gsc.riken.jp/db/annotate/main.cgi?masterid=A330077P12 | -1.1438900 | -0.3818783	NOCODE4.0	15	3	non-coding	12
NONMMUT023869	| NR_002864 | lncRNA | Mus musculus | | RefGeneNoncode | NR_002864 | | -1.0538700 | -0.1872878	NOCODE4.0	7	2	non-coding	6
NONMMUT024027	| AK082284 | mRNAlike lncRNA | Mus musculus | Mouse noncoding transcript | FANTOM3 | C230032J03 | http://fantom3.gsc.riken.jp/db/annotate/main.cgi?masterid=C230032J03 | -1.0944500 | -0.2302190	NOCODE4.0	39	5	non-coding	12
NONMMUT024407	| AK078693 | mRNAlike lncRNA | Mus musculus | Mouse noncoding transcript | FANTOM3 | 7530414M10 | http://fantom3.gsc.riken.jp/db/annotate/main.cgi?masterid=7530414M10 | -1.0656700 | -0.2802609	NOCODE4.0	8	3	non-coding	6
NONMMUT024677	| AK047473 | mRNAlike lncRNA | Mus musculus | Mouse noncoding transcript | FANTOM3 | B930074F24 | http://fantom3.gsc.riken.jp/db/annotate/main.cgi?masterid=B930074F24 | -1.2008200 | -0.3644056	NOCODE4.0	3	3	non-coding	6
NONMMUT025385	| AK157228 | mRNAlike lncRNA | Mus musculus | Mouse noncoding transcript | FANTOM3 | F830207E05 | http://fantom3.gsc.riken.jp/db/annotate/main.cgi?masterid=F830207E05 | 0.3053410 | -0.2376562	NOCODE4.0	12	4	non-coding	6
NONMMUT026612	| AK045852 | mRNAlike lncRNA | Mus musculus | Mouse noncoding transcript | FANTOM3 | B230315B10 | http://fantom3.gsc.riken.jp/db/annotate/main.cgi?masterid=B230315B10 | -1.1201200 | -0.3780421	NOCODE4.0	16	5	non-coding	6
NONMMUT026613	| AK046404 | mRNAlike lncRNA | Mus musculus | Mouse noncoding transcript | FANTOM3 | B230380D12 | http://fantom3.gsc.riken.jp/db/annotate/main.cgi?masterid=B230380D12 | -1.0858600 | -0.4581054	NOCODE4.0	9	4	non-coding	12
NONMMUT026627	| AK141903 | mRNAlike lncRNA | Mus musculus | Mouse noncoding transcript | FANTOM3 | D130058O20 | http://fantom3.gsc.riken.jp/db/annotate/main.cgi?masterid=D130058O20 | -1.1986700 | -0.3688105	NOCODE4.0	1	1	non-coding	6
NONMMUT026643	| AK051477 | mRNAlike lncRNA | Mus musculus | Mouse noncoding transcript | FANTOM3 | D130051P21 | http://fantom3.gsc.riken.jp/db/annotate/main.cgi?masterid=D130051P21 | -1.0203100 | -0.3634784	NOCODE4.0	4	3	non-coding	6
NONMMUT026644	| AK134819 | mRNAlike lncRNA | Mus musculus | Mouse noncoding transcript | FANTOM3 | 6330576O09 | http://fantom3.gsc.riken.jp/db/annotate/main.cgi?masterid=6330576O09 | -1.2236600 | -0.4048505	NOCODE4.0	8	3	non-coding	6
NONMMUT026766	| AK047367 | mRNAlike lncRNA | Mus musculus | Mouse noncoding transcript | FANTOM3 | B930053I17 | http://fantom3.gsc.riken.jp/db/annotate/main.cgi?masterid=B930053I17 | -0.6803580 | -0.1703256	NOCODE4.0	9	2	non-coding	78
NONMMUT026999	| AK149401 | mRNAlike lncRNA | Mus musculus | Mouse noncoding transcript | FANTOM3 | C730006C12 | http://fantom3.gsc.riken.jp/db/annotate/main.cgi?masterid=C730006C12 | 0.8435630 | -0.3976901	NOCODE4.0	15	5	non-coding	75
NONMMUT027166	| AK087370 | mRNAlike lncRNA | Mus musculus | Mouse noncoding transcript | FANTOM3 | E130001F17 | http://fantom3.gsc.riken.jp/db/annotate/main.cgi?masterid=E130001F17 | 0.9018880 | -0.3731613	NOCODE4.0	2	2	non-coding	6
NONMMUT027201	| AK081909 | mRNAlike lncRNA | Mus musculus | Mouse noncoding transcript | FANTOM3 | C130086G13 | http://fantom3.gsc.riken.jp/db/annotate/main.cgi?masterid=C130086G13 | -1.1066000 | -0.2978017	NOCODE4.0	16	4	non-coding	12
NONMMUT027268	| AK053492 | mRNAlike lncRNA | Mus musculus | Mouse noncoding transcript | FANTOM3 | E130102I04 | http://fantom3.gsc.riken.jp/db/annotate/main.cgi?masterid=E130102I04 | 0.1370210 | -0.3740340	NOCODE4.0	7	1	non-coding	14
NONMMUT027268	| AK053492 | mRNAlike lncRNA | Mus musculus | Mouse noncoding transcript | FANTOM3 | E130102I04 | http://fantom3.gsc.riken.jp/db/annotate/main.cgi?masterid=E130102I04 | 0.1370210 | -0.3740340	NOCODE4.0	7	1	non-coding	30
NONMMUT027269	| AK021366 | mRNAlike lncRNA | Mus musculus | Mouse noncoding transcript | FANTOM3 | E130102B10 | http://fantom3.gsc.riken.jp/db/annotate/main.cgi?masterid=E130102B10 | -1.3061300 | -0.3843668	NOCODE4.0	8	2	non-coding	6
NONMMUT027272	| AK041773 | mRNAlike lncRNA | Mus musculus | Mouse noncoding transcript | FANTOM3 | A630036G19 | http://fantom3.gsc.riken.jp/db/annotate/main.cgi?masterid=A630036G19 | -1.2558600 | -0.3588335	NOCODE4.0	4	2	non-coding	3
NONMMUT027445	| AK142843 | mRNAlike lncRNA | Mus musculus | Mouse noncoding transcript | FANTOM3 | D930027I24 | http://fantom3.gsc.riken.jp/db/annotate/main.cgi?masterid=D930027I24 | -1.5906100 | -0.3784932	NOCODE4.0	6	3	non-coding	12
NONMMUT027445	| AK142843 | mRNAlike lncRNA | Mus musculus | Mouse noncoding transcript | FANTOM3 | D930027I24 | http://fantom3.gsc.riken.jp/db/annotate/main.cgi?masterid=D930027I24 | -1.5906100 | -0.3784932	NOCODE4.0	6	3	non-coding	14
NONMMUT027569	| AK014675 | mRNAlike lncRNA | Mus musculus | Mouse noncoding transcript | FANTOM3 | 4833410I11 | http://fantom3.gsc.riken.jp/db/annotate/main.cgi?masterid=4833410I11 | -0.3895230 | -0.3309339	NOCODE4.0	5	3	non-coding	12
NONMMUT029762	| AK132543 | mRNAlike lncRNA | Mus musculus | Mouse noncoding transcript | FANTOM3 | 4831414K21 | http://fantom3.gsc.riken.jp/db/annotate/main.cgi?masterid=4831414K21 | -1.5906100 | -0.3823298	NOCODE4.0	2	1	non-coding	69
NONMMUT030206	| AK081162 | mRNAlike lncRNA | Mus musculus | Mouse noncoding transcript | FANTOM3 | B930094M09 | http://fantom3.gsc.riken.jp/db/annotate/main.cgi?masterid=B930094M09 | -0.9990260 | -0.2709101	NOCODE4.0	5	3	non-coding	6
NONMMUT031134	| AK042969 | mRNAlike lncRNA | Mus musculus | Mouse noncoding transcript | FANTOM3 | A730044C17 | http://fantom3.gsc.riken.jp/db/annotate/main.cgi?masterid=A730044C17 | -0.8465210 | -0.3906047	NOCODE4.0	2	2	non-coding	14
NONMMUT032142	| AK141538 | mRNAlike lncRNA | Mus musculus | Mouse noncoding transcript | FANTOM3 | C630015F02 | http://fantom3.gsc.riken.jp/db/annotate/main.cgi?masterid=C630015F02 | -1.1106300 | -0.3344685	NOCODE4.0	7	4	non-coding	30
NONMMUT032144	| AK046738 | mRNAlike lncRNA | Mus musculus | Mouse noncoding transcript | FANTOM3 | B530033N09 | http://fantom3.gsc.riken.jp/db/annotate/main.cgi?masterid=B530033N09 | -1.0415000 | -0.3790611	NOCODE4.0	5	3	non-coding	12
NONMMUT032196	| AK048737 | mRNAlike lncRNA | Mus musculus | Mouse noncoding transcript | FANTOM3 | C230032N17 | http://fantom3.gsc.riken.jp/db/annotate/main.cgi?masterid=C230032N17 | -1.1590500 | -0.3759335	NOCODE4.0	28	4	non-coding	6
NONMMUT032391	| AK033928 | mRNAlike lncRNA | Mus musculus | Mouse noncoding transcript | FANTOM3 | 9330117O12 | http://fantom3.gsc.riken.jp/db/annotate/main.cgi?masterid=9330117O12 | -0.7933040 | -0.2639640	NOCODE4.0	4	3	non-coding	12
NONMMUT032391	| AK033928 | mRNAlike lncRNA | Mus musculus | Mouse noncoding transcript | FANTOM3 | 9330117O12 | http://fantom3.gsc.riken.jp/db/annotate/main.cgi?masterid=9330117O12 | -0.7933040 | -0.2639640	NOCODE4.0	4	3	non-coding	15
NONMMUT032664	| AK082133 | mRNAlike lncRNA | Mus musculus | Mouse noncoding transcript | FANTOM3 | C230011O19 | http://fantom3.gsc.riken.jp/db/annotate/main.cgi?masterid=C230011O19 | -1.1791300 | -0.2576398	NOCODE4.0	9	3	non-coding	66
NONMMUT032957	| AK048451 | mRNAlike lncRNA | Mus musculus | Mouse noncoding transcript | FANTOM3 | C130061N14 | http://fantom3.gsc.riken.jp/db/annotate/main.cgi?masterid=C130061N14 | -0.4012780 | -0.3781195	NOCODE4.0	8	4	non-coding	15
NONMMUT032959	| AK043078 | mRNAlike lncRNA | Mus musculus | Mouse noncoding transcript | FANTOM3 | A730054A16 | http://fantom3.gsc.riken.jp/db/annotate/main.cgi?masterid=A730054A16 | -1.1049200 | -0.3074335	NOCODE4.0	7	4	non-coding	12
NONMMUT033152	| AK038999 | mRNAlike lncRNA | Mus musculus | Mouse noncoding transcript | FANTOM3 | A230083L10 | http://fantom3.gsc.riken.jp/db/annotate/main.cgi?masterid=A230083L10 | -1.2510200 | -0.3878076	NOCODE4.0	20	3	non-coding	12
NONMMUT033184	| AK033536 | mRNAlike lncRNA | Mus musculus | Mouse noncoding transcript | FANTOM3 | 9030611M06 | http://fantom3.gsc.riken.jp/db/annotate/main.cgi?masterid=9030611M06 | -1.2706000 | -0.2695734	NOCODE4.0	4	2	non-coding	69
NONMMUT035776	| AK028554 | mRNAlike lncRNA | Mus musculus | Mouse noncoding transcript | FANTOM3 | 4632431G21 | http://fantom3.gsc.riken.jp/db/annotate/main.cgi?masterid=4632431G21 | -1.5906100 | -0.4027878	NOCODE4.0	4	2	non-coding	66
NONMMUT035870	| AK080488 | mRNAlike lncRNA | Mus musculus | Mouse noncoding transcript | FANTOM3 | A730051I19 | http://fantom3.gsc.riken.jp/db/annotate/main.cgi?masterid=A730051I19 | 1.8403700 | -0.4435711	NOCODE4.0	46	4	non-coding	66
NONMMUT037072	| AK079359 | mRNAlike lncRNA | Mus musculus | Mouse noncoding transcript | FANTOM3 | 9630042G05 | http://fantom3.gsc.riken.jp/db/annotate/main.cgi?masterid=9630042G05 | -1.5906100 | -0.3986788	NOCODE4.0	3	2	non-coding	12
NONMMUT037278	| AK079699 | mRNAlike lncRNA | Mus musculus | Mouse noncoding transcript | FANTOM3 | A430018G15 | http://fantom3.gsc.riken.jp/db/annotate/main.cgi?masterid=A430018G15 | -1.2612700 | -0.2417482	NOCODE4.0	40	5	non-coding	6
NONMMUT037649	| AK159058 | mRNAlike lncRNA | Mus musculus | Mouse noncoding transcript | FANTOM3 | K530046H05 | http://fantom3.gsc.riken.jp/db/annotate/main.cgi?masterid=K530046H05 | -1.2594600 | -0.3486534	NOCODE4.0	1	1	non-coding	3
NONMMUT038059	| AK047186 | mRNAlike lncRNA | Mus musculus | Mouse noncoding transcript | FANTOM3 | B930032K17 | http://fantom3.gsc.riken.jp/db/annotate/main.cgi?masterid=B930032K17 | -0.9083940 | -0.3049199	NOCODE4.0	4	3	non-coding	12
NONMMUT038129	| AK134503 | mRNAlike lncRNA | Mus musculus | Mouse noncoding transcript | FANTOM3 | 6230421C12 | http://fantom3.gsc.riken.jp/db/annotate/main.cgi?masterid=6230421C12 | 0.2017030 | -0.3906211	NOCODE4.0	11	3	non-coding	15
NONMMUT038518	| AK039132 | mRNAlike lncRNA | Mus musculus | Mouse noncoding transcript | FANTOM3 | A230101G02 | http://fantom3.gsc.riken.jp/db/annotate/main.cgi?masterid=A230101G02 | -1.0536000 | -0.2242199	NOCODE4.0	4	2	non-coding	12
NONMMUT040968	| NULL | lncRNA | Mus musculus | | EnsemblNoncode | ENSMUST00000145985 | | -1.1580200 | -0.1991173	NOCODE4.0	1	1	non-coding	6
NONMMUT041963	| AK149330 | mRNAlike lncRNA | Mus musculus | Mouse noncoding transcript | FANTOM3 | A930027J23 | http://fantom3.gsc.riken.jp/db/annotate/main.cgi?masterid=A930027J23 | -1.2173800 | -0.3934659	NOCODE4.0	2	2	non-coding	12
NONMMUT042187	| NR_033490 | lncRNA | Mus musculus | | RefGeneNoncode | NR_033490 | | -0.9707350 | -0.3410056	NOCODE4.0	20	3	non-coding	12
NONMMUT042271	| AK054291 | mRNAlike lncRNA | Mus musculus | Mouse noncoding transcript | FANTOM3 | E330010P06 | http://fantom3.gsc.riken.jp/db/annotate/main.cgi?masterid=E330010P06 | 5.4866800 | -0.3166157	NOCODE4.0	1	1	non-coding	15
NONMMUT042289	| AK048372 | mRNAlike lncRNA | Mus musculus | Mouse noncoding transcript | FANTOM3 | C130053G17 | http://fantom3.gsc.riken.jp/db/annotate/main.cgi?masterid=C130053G17 | -1.0264200 | -0.3496603	NOCODE4.0	40	6	non-coding	6
NONMMUT042291	| AK045653 | mRNAlike lncRNA | Mus musculus | Mouse noncoding transcript | FANTOM3 | B230218L23 | http://fantom3.gsc.riken.jp/db/annotate/main.cgi?masterid=B230218L23 | -1.5906100 | -0.3805285	NOCODE4.0	4	2	non-coding	8
NONMMUT042291	| AK045653 | mRNAlike lncRNA | Mus musculus | Mouse noncoding transcript | FANTOM3 | B230218L23 | http://fantom3.gsc.riken.jp/db/annotate/main.cgi?masterid=B230218L23 | -1.5906100 | -0.3805285	NOCODE4.0	4	2	non-coding	12
NONMMUT043551	| AK139973 | mRNAlike lncRNA | Mus musculus | Mouse noncoding transcript | FANTOM3 | B230018N14 | http://fantom3.gsc.riken.jp/db/annotate/main.cgi?masterid=B230018N14 | -1.5906100 | -0.4132164	NOCODE4.0	1	1	non-coding	69
NONMMUT043579	| AK013842 | mRNAlike lncRNA | Mus musculus | Mouse noncoding transcript | FANTOM3 | 2900092N11 | http://fantom3.gsc.riken.jp/db/annotate/main.cgi?masterid=2900092N11 | -1.1339600 | -0.4854483	NOCODE4.0	5	3	non-coding	12
NONMMUT045141	| AK039779 | mRNAlike lncRNA | Mus musculus | Mouse noncoding transcript | FANTOM3 | A330107D21 | http://fantom3.gsc.riken.jp/db/annotate/main.cgi?masterid=A330107D21 | -1.0413300 | -0.3825579	NOCODE4.0	4	3	non-coding	12
NONMMUT045163	| AK032130 | mRNAlike lncRNA | Mus musculus | Mouse noncoding transcript | FANTOM3 | 6332417E24 | http://fantom3.gsc.riken.jp/db/annotate/main.cgi?masterid=6332417E24 | 3.5490700 | -0.3208982	NOCODE4.0	8	4	non-coding	6
NONMMUT045895	| AK044676 | mRNAlike lncRNA | Mus musculus | Mouse noncoding transcript | FANTOM3 | A930031L16 | http://fantom3.gsc.riken.jp/db/annotate/main.cgi?masterid=A930031L16 | -1.2940100 | -0.4334140	NOCODE4.0	26	6	non-coding	12
NONMMUT047430	| AK133323 | mRNAlike lncRNA | Mus musculus | Mouse noncoding transcript | FANTOM3 | 4932433C14 | http://fantom3.gsc.riken.jp/db/annotate/main.cgi?masterid=4932433C14 | -0.0601171 | -0.2212934	NOCODE4.0	1	1	non-coding	14
NONMMUT047865	| AK047237 | mRNAlike lncRNA | Mus musculus | Mouse noncoding transcript | FANTOM3 | B930041D05 | http://fantom3.gsc.riken.jp/db/annotate/main.cgi?masterid=B930041D05 | -1.2410100 | -0.3295903	NOCODE4.0	3	3	non-coding	6
NONMMUT048013	| AK045393 | mRNAlike lncRNA | Mus musculus | Mouse noncoding transcript | FANTOM3 | B230112K06 | http://fantom3.gsc.riken.jp/db/annotate/main.cgi?masterid=B230112K06 | 0.0436799 | -0.3732496	NOCODE4.0	1	1	non-coding	6
NONMMUT048370	| AK158290 | mRNAlike lncRNA | Mus musculus | Mouse noncoding transcript | FANTOM3 | F930101C23 | http://fantom3.gsc.riken.jp/db/annotate/main.cgi?masterid=F930101C23 | -1.1284300 | -0.3877795	NOCODE4.0	18	3	non-coding	12
NONMMUT048391	| AK047704 | mRNAlike lncRNA | Mus musculus | Mouse noncoding transcript | FANTOM3 | C030014L02 | http://fantom3.gsc.riken.jp/db/annotate/main.cgi?masterid=C030014L02 | -1.1425200 | -0.3131738	NOCODE4.0	4	2	non-coding	6
NONMMUT049701	| NR_040648 | lncRNA | Mus musculus | | RefGeneNoncode | NR_040648 | | -0.9198200 | -0.2513571	NOCODE4.0	11	4	non-coding	14
NONMMUT049810	| AK162397 | mRNAlike lncRNA | Mus musculus | Mouse noncoding transcript | FANTOM3 | 9330115K15 | http://fantom3.gsc.riken.jp/db/annotate/main.cgi?masterid=9330115K15 | -0.1717410 | -0.3733387	NOCODE4.0	14	3	non-coding	12
NONMMUT049810	| AK162397 | mRNAlike lncRNA | Mus musculus | Mouse noncoding transcript | FANTOM3 | 9330115K15 | http://fantom3.gsc.riken.jp/db/annotate/main.cgi?masterid=9330115K15 | -0.1717410 | -0.3733387	NOCODE4.0	14	3	non-coding	14
NONMMUT050612	| AK144492 | mRNAlike lncRNA | Mus musculus | Mouse noncoding transcript | FANTOM3 | G630078N12 | http://fantom3.gsc.riken.jp/db/annotate/main.cgi?masterid=G630078N12 | -1.0311400 | -0.1274944	NOCODE4.0	10	5	non-coding	12
NONMMUT051223	| AK048573 | mRNAlike lncRNA | Mus musculus | Mouse noncoding transcript | FANTOM3 | C130078G20 | http://fantom3.gsc.riken.jp/db/annotate/main.cgi?masterid=C130078G20 | -1.4034000 | -0.4068630	NOCODE4.0	6	3	non-coding	6
NONMMUT051223	| AK048573 | mRNAlike lncRNA | Mus musculus | Mouse noncoding transcript | FANTOM3 | C130078G20 | http://fantom3.gsc.riken.jp/db/annotate/main.cgi?masterid=C130078G20 | -1.4034000 | -0.4068630	NOCODE4.0	6	3	non-coding	12
NONMMUT051225	| AK033895 | mRNAlike lncRNA | Mus musculus | Mouse noncoding transcript | FANTOM3 | 9330111N19 | http://fantom3.gsc.riken.jp/db/annotate/main.cgi?masterid=9330111N19 | -1.1928900 | -0.4470206	NOCODE4.0	3	3	non-coding	6
NONMMUT051225	| AK033895 | mRNAlike lncRNA | Mus musculus | Mouse noncoding transcript | FANTOM3 | 9330111N19 | http://fantom3.gsc.riken.jp/db/annotate/main.cgi?masterid=9330111N19 | -1.1928900 | -0.4470206	NOCODE4.0	3	3	non-coding	15
NONMMUT051355	| AK047544 | mRNAlike lncRNA | Mus musculus | Mouse noncoding transcript | FANTOM3 | B930086K05 | http://fantom3.gsc.riken.jp/db/annotate/main.cgi?masterid=B930086K05 | -1.0579000 | -0.4852147	NOCODE4.0	12	4	non-coding	12
NONMMUT051642	| AK045426 | mRNAlike lncRNA | Mus musculus | Mouse noncoding transcript | FANTOM3 | B230117M02 | http://fantom3.gsc.riken.jp/db/annotate/main.cgi?masterid=B230117M02 | -1.2220400 | -0.2951127	NOCODE4.0	16	2	non-coding	14
NONMMUT052212	| AK138340 | mRNAlike lncRNA | Mus musculus | Mouse noncoding transcript | FANTOM3 | A230073I20 | http://fantom3.gsc.riken.jp/db/annotate/main.cgi?masterid=A230073I20 | -1.1070000 | -0.3062255	NOCODE4.0	5	3	non-coding	6
NONMMUT052212	| AK138340 | mRNAlike lncRNA | Mus musculus | Mouse noncoding transcript | FANTOM3 | A230073I20 | http://fantom3.gsc.riken.jp/db/annotate/main.cgi?masterid=A230073I20 | -1.1070000 | -0.3062255	NOCODE4.0	5	3	non-coding	12
NONMMUT053428	| AK155231 | mRNAlike lncRNA | Mus musculus | Mouse noncoding transcript | FANTOM3 | F630210B15 | http://fantom3.gsc.riken.jp/db/annotate/main.cgi?masterid=F630210B15 | -0.9870140 | -0.2724158	NOCODE4.0	4	2	non-coding	75
NONMMUT054688	| AK082203 | mRNAlike lncRNA | Mus musculus | Mouse noncoding transcript | FANTOM3 | C230022P04 | http://fantom3.gsc.riken.jp/db/annotate/main.cgi?masterid=C230022P04 | -1.0291500 | -0.2761873	NOCODE4.0	43	6	non-coding	12
NONMMUT055492	| AK138160 | mRNAlike lncRNA | Mus musculus | Mouse noncoding transcript | FANTOM3 | A230018E09 | http://fantom3.gsc.riken.jp/db/annotate/main.cgi?masterid=A230018E09 | -1.2241800 | -0.3569611	NOCODE4.0	35	6	non-coding	12
NONMMUT055621	| AK088178 | mRNAlike lncRNA | Mus musculus | Mouse noncoding transcript | FANTOM3 | E430005J01 | http://fantom3.gsc.riken.jp/db/annotate/main.cgi?masterid=E430005J01 | -0.8140010 | -0.3622644	NOCODE4.0	12	3	non-coding	30
NONMMUT055908	| AK043453 | mRNAlike lncRNA | Mus musculus | Mouse noncoding transcript | FANTOM3 | A730096M12 | http://fantom3.gsc.riken.jp/db/annotate/main.cgi?masterid=A730096M12 | -0.1866630 | -0.3948924	NOCODE4.0	1	1	non-coding	14
NONMMUT055912	| AK140700 | mRNAlike lncRNA | Mus musculus | Mouse noncoding transcript | FANTOM3 | B930096G07 | http://fantom3.gsc.riken.jp/db/annotate/main.cgi?masterid=B930096G07 | 1.9026200 | -0.3318883	NOCODE4.0	8	2	non-coding	6
NONMMUT055912	| AK140700 | mRNAlike lncRNA | Mus musculus | Mouse noncoding transcript | FANTOM3 | B930096G07 | http://fantom3.gsc.riken.jp/db/annotate/main.cgi?masterid=B930096G07 | 1.9026200 | -0.3318883	NOCODE4.0	8	2	non-coding	12
NONMMUT056384	| AK035469 | mRNAlike lncRNA | Mus musculus | Mouse noncoding transcript | FANTOM3 | 9530052J19 | http://fantom3.gsc.riken.jp/db/annotate/main.cgi?masterid=9530052J19 | -0.1527190 | -0.3869883	NOCODE4.0	7	2	non-coding	12
NONMMUT057237	| AK137420 | mRNAlike lncRNA | Mus musculus | Mouse noncoding transcript | FANTOM3 | 9630053C23 | http://fantom3.gsc.riken.jp/db/annotate/main.cgi?masterid=9630053C23 | -1.5906100 | -0.3555869	NOCODE4.0	9	4	non-coding	12
NONMMUT057509	| AK141038 | mRNAlike lncRNA | Mus musculus | Mouse noncoding transcript | FANTOM3 | C230012B10 | http://fantom3.gsc.riken.jp/db/annotate/main.cgi?masterid=C230012B10 | -0.2306840 | -0.3451422	NOCODE4.0	1	1	non-coding	12
NONMMUT057511	| AK079101 | mRNAlike lncRNA | Mus musculus | Mouse noncoding transcript | FANTOM3 | 9330187J04 | http://fantom3.gsc.riken.jp/db/annotate/main.cgi?masterid=9330187J04 | -1.1340600 | -0.3733028	NOCODE4.0	9	3	non-coding	9
NONMMUT057511	| AK079101 | mRNAlike lncRNA | Mus musculus | Mouse noncoding transcript | FANTOM3 | 9330187J04 | http://fantom3.gsc.riken.jp/db/annotate/main.cgi?masterid=9330187J04 | -1.1340600 | -0.3733028	NOCODE4.0	9	3	non-coding	12
NONMMUT057895	| AK046305 | mRNAlike lncRNA | Mus musculus | Mouse noncoding transcript | FANTOM3 | B230367P07 | http://fantom3.gsc.riken.jp/db/annotate/main.cgi?masterid=B230367P07 | -0.8594880 | -0.2748820	NOCODE4.0	2	2	non-coding	75
NONMMUT061368	| AK003932 | mRNAlike lncRNA | Mus musculus | Mouse noncoding transcript | FANTOM3 | 1110027G09 | http://fantom3.gsc.riken.jp/db/annotate/main.cgi?masterid=1110027G09 | -1.0542000 | -0.3391472	NOCODE4.0	3	2	non-coding	12
NONMMUT061402	| AK046311 | mRNAlike lncRNA | Mus musculus | Mouse noncoding transcript | FANTOM3 | B230368F23 | http://fantom3.gsc.riken.jp/db/annotate/main.cgi?masterid=B230368F23 | -1.1411900 | -0.3764065	NOCODE4.0	16	3	non-coding	12
NONMMUT061403	| AK034189 | mRNAlike lncRNA | Mus musculus | Mouse noncoding transcript | FANTOM3 | 9330162G02 | http://fantom3.gsc.riken.jp/db/annotate/main.cgi?masterid=9330162G02 | -1.3522300 | -0.4431421	NOCODE4.0	28	4	non-coding	12
NONMMUT061411	| AK046343 | mRNAlike lncRNA | Mus musculus | Mouse noncoding transcript | FANTOM3 | B230373D06 | http://fantom3.gsc.riken.jp/db/annotate/main.cgi?masterid=B230373D06 | -1.1109200 | -0.3560492	NOCODE4.0	5	2	non-coding	3
NONMMUT061411	| AK046343 | mRNAlike lncRNA | Mus musculus | Mouse noncoding transcript | FANTOM3 | B230373D06 | http://fantom3.gsc.riken.jp/db/annotate/main.cgi?masterid=B230373D06 | -1.1109200 | -0.3560492	NOCODE4.0	5	2	non-coding	12
NONMMUT061423	| AK048846 | mRNAlike lncRNA | Mus musculus | Mouse noncoding transcript | FANTOM3 | C230074P11 | http://fantom3.gsc.riken.jp/db/annotate/main.cgi?masterid=C230074P11 | -1.2245600 | -0.4266832	NOCODE4.0	4	2	non-coding	12
NONMMUT061426	| AK165737 | mRNAlike lncRNA | Mus musculus | Mouse noncoding transcript | FANTOM3 | G630034N16 | http://fantom3.gsc.riken.jp/db/annotate/main.cgi?masterid=G630034N16 | -1.1124600 | -0.3911075	NOCODE4.0	2	2	non-coding	12
NONMMUT061434	| AK045827 | mRNAlike lncRNA | Mus musculus | Mouse noncoding transcript | FANTOM3 | B230312N01 | http://fantom3.gsc.riken.jp/db/annotate/main.cgi?masterid=B230312N01 | 0.2372000 | -0.3704998	NOCODE4.0	2	1	non-coding	3
NONMMUT061607	| U69888 | IPW RNA | Mus musculus | IPW | NONCODE v2.0 | n5241 | NULL | -1.5906100 | -0.2692598	NOCODE4.0	13	3	non-coding	6
NONMMUT061609	| AK045462 | mRNAlike lncRNA | Mus musculus | Mouse noncoding transcript | FANTOM3 | B230205D10 | http://fantom3.gsc.riken.jp/db/annotate/main.cgi?masterid=B230205D10 | -0.3279930 | -0.4500190	NOCODE4.0	4	2	non-coding	3
NONMMUT061609	| AK045462 | mRNAlike lncRNA | Mus musculus | Mouse noncoding transcript | FANTOM3 | B230205D10 | http://fantom3.gsc.riken.jp/db/annotate/main.cgi?masterid=B230205D10 | -0.3279930 | -0.4500190	NOCODE4.0	4	2	non-coding	14
NONMMUT061714	| AK046019 | mRNAlike lncRNA | Mus musculus | Mouse noncoding transcript | FANTOM3 | B230334A10 | http://fantom3.gsc.riken.jp/db/annotate/main.cgi?masterid=B230334A10 | -1.1693700 | -0.3440357	NOCODE4.0	9	2	non-coding	3
NONMMUT061719	| NULL | lncRNA | Mus musculus | | UCSCGeneNoncode | uc009hex.1 | | 1.0744700 | -0.2422632	NOCODE4.0	1	1	non-coding	12
NONMMUT061936	| AK039294 | mRNAlike lncRNA | Mus musculus | Mouse noncoding transcript | FANTOM3 | A330017C21 | http://fantom3.gsc.riken.jp/db/annotate/main.cgi?masterid=A330017C21 | 1.2526300 | -0.1141155	NOCODE4.0	14	3	non-coding	3
NONMMUT062345	| AK046848 | mRNAlike lncRNA | Mus musculus | Mouse noncoding transcript | FANTOM3 | B830028K19 | http://fantom3.gsc.riken.jp/db/annotate/main.cgi?masterid=B830028K19 | -0.9088060 | -0.3135939	NOCODE4.0	3	1	non-coding	12
NONMMUT062609	| AK021113 | mRNAlike lncRNA | Mus musculus | Mouse noncoding transcript | FANTOM3 | C030032F19 | http://fantom3.gsc.riken.jp/db/annotate/main.cgi?masterid=C030032F19 | -0.3596540 | -0.1584088	NOCODE4.0	18	3	non-coding	30
NONMMUT063537	| AK140221 | mRNAlike lncRNA | Mus musculus | Mouse noncoding transcript | FANTOM3 | B230352I09 | http://fantom3.gsc.riken.jp/db/annotate/main.cgi?masterid=B230352I09 | 4.3303200 | -0.2004710	NOCODE4.0	35	5	non-coding	6
NONMMUT064537	| AK078610 | mRNAlike lncRNA | Mus musculus | Mouse noncoding transcript | FANTOM3 | 7120408P05 | http://fantom3.gsc.riken.jp/db/annotate/main.cgi?masterid=7120408P05 | -1.0907600 | -0.3693230	NOCODE4.0	15	3	non-coding	3
NONMMUT064537	| AK078610 | mRNAlike lncRNA | Mus musculus | Mouse noncoding transcript | FANTOM3 | 7120408P05 | http://fantom3.gsc.riken.jp/db/annotate/main.cgi?masterid=7120408P05 | -1.0907600 | -0.3693230	NOCODE4.0	15	3	non-coding	6
NONMMUT065328	| AK034363 | mRNAlike lncRNA | Mus musculus | Mouse noncoding transcript | FANTOM3 | 9330183I17 | http://fantom3.gsc.riken.jp/db/annotate/main.cgi?masterid=9330183I17 | -1.1297000 | -0.4365434	NOCODE4.0	38	5	non-coding	6
NONMMUT065328	| AK034363 | mRNAlike lncRNA | Mus musculus | Mouse noncoding transcript | FANTOM3 | 9330183I17 | http://fantom3.gsc.riken.jp/db/annotate/main.cgi?masterid=9330183I17 | -1.1297000 | -0.4365434	NOCODE4.0	38	5	non-coding	12
NONMMUT065659	| AK043213 | mRNAlike lncRNA | Mus musculus | Mouse noncoding transcript | FANTOM3 | A730071F05 | http://fantom3.gsc.riken.jp/db/annotate/main.cgi?masterid=A730071F05 | -1.2698500 | -0.4212998	NOCODE4.0	1	1	non-coding	6
NONMMUT066531	| AK082312 | mRNAlike lncRNA | Mus musculus | Mouse noncoding transcript | FANTOM3 | C230036H16 | http://fantom3.gsc.riken.jp/db/annotate/main.cgi?masterid=C230036H16 | -1.3667200 | -0.2723870	NOCODE4.0	7	3	non-coding	6
NONMMUT067081	| AK042944 | mRNAlike lncRNA | Mus musculus | Mouse noncoding transcript | FANTOM3 | A730042F04 | http://fantom3.gsc.riken.jp/db/annotate/main.cgi?masterid=A730042F04 | -1.2246700 | -0.2943242	NOCODE4.0	3	2	non-coding	3
NONMMUT067081	| AK042944 | mRNAlike lncRNA | Mus musculus | Mouse noncoding transcript | FANTOM3 | A730042F04 | http://fantom3.gsc.riken.jp/db/annotate/main.cgi?masterid=A730042F04 | -1.2246700 | -0.2943242	NOCODE4.0	3	2	non-coding	6
NONMMUT067432	| NULL | lncRNA | Mus musculus | | UCSCGeneNoncode | uc009nqy.1 | | -0.7143790 | -0.1918483	NOCODE4.0	16	3	non-coding	6
NONMMUT067432	| NULL | lncRNA | Mus musculus | | UCSCGeneNoncode | uc009nqy.1 | | -0.7143790 | -0.1918483	NOCODE4.0	16	3	non-coding	30
NONMMUT067800	| AK141258 | mRNAlike lncRNA | Mus musculus | Mouse noncoding transcript | FANTOM3 | C430002C22 | http://fantom3.gsc.riken.jp/db/annotate/main.cgi?masterid=C430002C22 | -0.9193080 | -0.2794248	NOCODE4.0	7	3	non-coding	6
NONMMUT068245	| AK086981 | mRNAlike lncRNA | Mus musculus | Mouse noncoding transcript | FANTOM3 | E030017J04 | http://fantom3.gsc.riken.jp/db/annotate/main.cgi?masterid=E030017J04 | -1.1239300 | -0.2816408	NOCODE4.0	5	3	non-coding	6
NONMMUT068540	| AK163514 | mRNAlike lncRNA | Mus musculus | Mouse noncoding transcript | FANTOM3 | B230328M02 | http://fantom3.gsc.riken.jp/db/annotate/main.cgi?masterid=B230328M02 | -1.0179200 | -0.2151664	NOCODE4.0	2	2	non-coding	30
NONMMUT068903	| AK044864 | mRNAlike lncRNA | Mus musculus | Mouse noncoding transcript | FANTOM3 | B130008O15 | http://fantom3.gsc.riken.jp/db/annotate/main.cgi?masterid=B130008O15 | -0.1904880 | -0.3345353	NOCODE4.0	7	3	non-coding	75
NONMMUT068938	| AK039784 | mRNAlike lncRNA | Mus musculus | Mouse noncoding transcript | FANTOM3 | A330108B13 | http://fantom3.gsc.riken.jp/db/annotate/main.cgi?masterid=A330108B13 | -1.2398600 | -0.3674449	NOCODE4.0	2	1	non-coding	12
NONMMUT069567	| AK148874 | mRNAlike lncRNA | Mus musculus | Mouse noncoding transcript | FANTOM3 | 7120458A10 | http://fantom3.gsc.riken.jp/db/annotate/main.cgi?masterid=7120458A10 | -0.3358000 | -0.3242158	NOCODE4.0	5	3	non-coding	6
NONMMUT070203	| AK039736 | mRNAlike lncRNA | Mus musculus | Mouse noncoding transcript | FANTOM3 | A330101I18 | http://fantom3.gsc.riken.jp/db/annotate/main.cgi?masterid=A330101I18 | -1.1292900 | -0.3498583	NOCODE4.0	6	3	non-coding	6
NONMMUT070203	| AK039736 | mRNAlike lncRNA | Mus musculus | Mouse noncoding transcript | FANTOM3 | A330101I18 | http://fantom3.gsc.riken.jp/db/annotate/main.cgi?masterid=A330101I18 | -1.1292900 | -0.3498583	NOCODE4.0	6	3	non-coding	12
NONMMUT071121	| AK040381 | mRNAlike lncRNA | Mus musculus | Mouse noncoding transcript | FANTOM3 | A430089O21 | http://fantom3.gsc.riken.jp/db/annotate/main.cgi?masterid=A430089O21 | -1.2413000 | -0.2864708	NOCODE4.0	1	1	non-coding	12
NONMMUT071121	| AK040381 | mRNAlike lncRNA | Mus musculus | Mouse noncoding transcript | FANTOM3 | A430089O21 | http://fantom3.gsc.riken.jp/db/annotate/main.cgi?masterid=A430089O21 | -1.2413000 | -0.2864708	NOCODE4.0	1	1	non-coding	15
NONMMUT072615	| AK032183 | mRNAlike lncRNA | Mus musculus | Mouse noncoding transcript | FANTOM3 | 6430408D07 | http://fantom3.gsc.riken.jp/db/annotate/main.cgi?masterid=6430408D07 | -0.1585230 | -0.4142083	NOCODE4.0	12	3	non-coding	3
NONMMUT072615	| AK032183 | mRNAlike lncRNA | Mus musculus | Mouse noncoding transcript | FANTOM3 | 6430408D07 | http://fantom3.gsc.riken.jp/db/annotate/main.cgi?masterid=6430408D07 | -0.1585230 | -0.4142083	NOCODE4.0	12	3	non-coding	12
NONMMUT073155	| AK087745 | mRNAlike lncRNA | Mus musculus | Mouse noncoding transcript | FANTOM3 | E330015B21 | http://fantom3.gsc.riken.jp/db/annotate/main.cgi?masterid=E330015B21 | -1.1673400 | -0.3209934	NOCODE4.0	8	3	non-coding	69
NONMMUT073256	| AK036748 | mRNAlike lncRNA | Mus musculus | Mouse noncoding transcript | FANTOM3 | 9830169G21 | http://fantom3.gsc.riken.jp/db/annotate/main.cgi?masterid=9830169G21 | 1.4792300 | -0.3560966	NOCODE4.0	13	3	non-coding	78
NONMMUT073591	| AK134610 | mRNAlike lncRNA | Mus musculus | Mouse noncoding transcript | FANTOM3 | 6330500K14 | http://fantom3.gsc.riken.jp/db/annotate/main.cgi?masterid=6330500K14 | -1.5906100 | -0.3234290	NOCODE4.0	16	3	non-coding	12
NONMMUT074526	| AK015184 | mRNAlike lncRNA | Mus musculus | Mouse noncoding transcript | FANTOM3 | 4930422N03 | http://fantom3.gsc.riken.jp/db/annotate/main.cgi?masterid=4930422N03 | -1.0431600 | -0.4310237	NOCODE4.0	8	2	non-coding	69
NONMMUT074554	| AK079596 | mRNAlike lncRNA | Mus musculus | Mouse noncoding transcript | FANTOM3 | A330053K08 | http://fantom3.gsc.riken.jp/db/annotate/main.cgi?masterid=A330053K08 | -1.0573100 | -0.3232508	NOCODE4.0	7	2	non-coding	3
NONMMUT074698	| AK045157 | mRNAlike lncRNA | Mus musculus | Mouse noncoding transcript | FANTOM3 | B130041K22 | http://fantom3.gsc.riken.jp/db/annotate/main.cgi?masterid=B130041K22 | -0.9990440 | -0.3774412	NOCODE4.0	32	4	non-coding	66
Nos1	nitric oxide synthase 1, neuronal // nitric oxide synthase 1, neuronal // nitric oxide synthase 1, neuronal // nitric oxide synthase 1, neuronal // nitric oxide synthase 1, neuronal // nitric oxide synthase 1, neuronal // nitric oxide synthase 1, neuronal // nitric oxide synthase 1, neuronal // nitric oxide synthase 1, neuronal // nitric oxide synthase 1, neuronal // nitric oxide synthase 1, neur…		2	2	coding	12
Npl	N-acetylneuraminate pyruvate lyase // N-acetylneuraminate pyruvate lyase // N-acetylneuraminate pyruvate lyase		5	3	coding	78
Nptx1	neuronal pentraxin 1 // neuronal pentraxin 1 // neuronal pentraxin 1 // neuronal pentraxin 1 // neuronal pentraxin 1 // neuronal pentraxin 1		2	2	coding	30
NR_075074		UCSC	5	3	non-coding	12
Nrgn	neurogranin // neurogranin // neurogranin		3	2	coding	12
Nrip2	nuclear receptor interacting protein 2 // nuclear receptor interacting protein 2 // nuclear receptor interacting protein 2 // nuclear receptor interacting protein 2 // nuclear receptor interacting protein 2 // nuclear receptor interacting protein 2 // nuclear receptor interacting protein 2 // nuclear receptor interacting protein 2 // nuclear receptor interacting protein 2 // nuclear receptor inte…		3	3	coding	6
Nrn1	neuritin 1 // neuritin 1 // neuritin 1 // neuritin 1 // neuritin 1 // neuritin 1		2	2	coding	30
Nrsn2	neurensin 2 // neurensin 2 // neurensin 2 // predicted gene 14164		1	1	coding	3
Nrxn2	neurexin II // neurexin II // neurexin II // neurexin II // neurexin II // neurexin II // neurexin II // neurexin II // neurexin II // neurexin II // neurexin II		3	3	coding	12
Nsg1	neuron specific gene family member 1 // neuron specific gene family member 1 // neuron specific gene family member 1		1	1	coding	12
Nsg2	neuron specific gene family member 2 // neuron specific gene family member 2 // neuron specific gene family member 2 // neuron specific gene family member 2 // neuron specific gene family member 2		6	4	coding	12
Ntsr2	neurotensin receptor 2 // neurotensin receptor 2 // neurotensin receptor 2 // neurotensin receptor 2 // neurotensin receptor 2 // neurotensin receptor 2 // neurotensin receptor 2 // neurotensin receptor 2		1	1	coding	6
Nudt10	nudix (nucleoside diphosphate linked moiety X)-type motif 10 // nudix (nucleoside diphosphate linked moiety X)-type motif 11 // nudix (nucleoside diphosphate linked moiety X)-type motif 11 // nudix (nucleoside diphosphate linked moiety X)-type motif 10 // nudix (nucleoside diphosphate linked moiety X)-type motif 10 // nudix (nucleoside diphosphate linked moiety X)-type motif 11 // nudix (nucleosi…		6	4	coding	12
Nwd1	NACHT and WD repeat domain containing 1 // NACHT and WD repeat domain containing 1 // NACHT and WD repeat domain containing 1 // NACHT and WD repeat domain containing 1 // NACHT and WD repeat domain containing 1 // NACHT and WD repeat domain containing 1 // NACHT and WD repeat domain containing 1		3	2	coding	12
Odz1	odd Oz/ten-m homolog 1 (Drosophila) // odd Oz/ten-m homolog 1 (Drosophila)		3	3	coding	6
Odz4	odd Oz/ten-m homolog 4 (Drosophila) // odd Oz/ten-m homolog 4 (Drosophila) // odd Oz/ten-m homolog 4 (Drosophila) // odd Oz/ten-m homolog 4 (Drosophila)		1	1	coding	12
Ogfod1	2-oxoglutarate and iron-dependent oxygenase domain containing 1 // 2-oxoglutarate and iron-dependent oxygenase domain containing 1 // 2-oxoglutarate and iron-dependent oxygenase domain containing 1 // 2-oxoglutarate and iron-dependent oxygenase domain containing 1 // 2-oxoglutarate and iron-dependent oxygenase domain containing 1 // 2-oxoglutarate and iron-dependent oxygenase domain containing 1 …		4	4	coding	12
Olfm3	olfactomedin 3 // olfactomedin 3 // olfactomedin 3 // olfactomedin 3 // olfactomedin 3		3	3	coding	6
Olfr1161	olfactory receptor 1161 // olfactory receptor 1161 // olfactory receptor 1161		6	3	coding	75
Olfr1411	olfactory receptor 1411 // olfactory receptor 1411 // olfactory receptor 1411 // olfactory receptor 1411 // olfactory receptor 1411 // olfactory receptor 1411		2	2	coding	6
Olfr519	olfactory receptor 519 // olfactory receptor 519 // olfactory receptor 519 // olfactory receptor 519 // olfactory receptor 512 // olfactory receptor 512 // olfactory receptor 512		1	1	coding	6
Oprd1	opioid receptor, delta 1 // opioid receptor, delta 1 // opioid receptor, delta 1 // opioid receptor, delta 1 // opioid receptor, delta 1 // opioid receptor, delta 1		3	3	coding	12
Oprk1	opioid receptor, kappa 1 // opioid receptor, kappa 1 // opioid receptor, kappa 1 // opioid receptor, kappa 1 // opioid receptor, kappa 1 // opioid receptor, kappa 1 // opioid receptor, kappa 1 // opioid receptor, kappa 1 // opioid receptor, kappa 1 // opioid receptor, kappa 1 // opioid receptor, kappa 1 // opioid receptor, kappa 1		1	1	coding	12
Oprl1	opioid receptor-like 1 // opioid receptor-like 1 // opioid receptor-like 1 // opioid receptor-like 1 // opioid receptor-like 1 // opioid receptor-like 1 // opioid receptor-like 1 // opioid receptor-like 1 // opioid receptor-like 1 // opioid receptor-like 1 // opioid receptor-like 1 // opioid receptor-like 1 // opioid receptor-like 1 // opioid receptor-like 1 // opioid receptor-like 1 // opioid re…		2	2	coding	6
Osbpl6	oxysterol binding protein-like 6 // oxysterol binding protein-like 6 // oxysterol binding protein-like 6 // oxysterol binding protein-like 6 // oxysterol binding protein-like 6 // oxysterol binding protein-like 6 // oxysterol binding protein-like 6		1	1	coding	3
Ostf1	osteoclast stimulating factor 1 // osteoclast stimulating factor 1 // osteoclast stimulating factor 1 // osteoclast stimulating factor 1 // osteoclast stimulating factor 1 // osteoclast stimulating factor 1 // osteoclast stimulating factor 1 // osteoclast stimulating factor 1 // osteoclast stimulating factor 1		1	1	coding	78
Otub2	OTU domain, ubiquitin aldehyde binding 2 // OTU domain, ubiquitin aldehyde binding 2 // OTU domain, ubiquitin aldehyde binding 2 // OTU domain, ubiquitin aldehyde binding 2 // OTU domain, ubiquitin aldehyde binding 2 // OTU domain, ubiquitin aldehyde binding 2 // OTU domain, ubiquitin aldehyde binding 2		1	1	coding	12
P2rx5	purinergic receptor P2X, ligand-gated ion channel, 5 // purinergic receptor P2X, ligand-gated ion channel, 5 // purinergic receptor P2X, ligand-gated ion channel, 5 // purinergic receptor P2X, ligand-gated ion channel, 5 // purinergic receptor P2X, ligand-gated ion channel, 5 // purinergic receptor P2X, ligand-gated ion channel, 5		2	2	coding	6
P2rx6	purinergic receptor P2X, ligand-gated ion channel, 6 // purinergic receptor P2X, ligand-gated ion channel, 6 // purinergic receptor P2X, ligand-gated ion channel, 6 // purinergic receptor P2X, ligand-gated ion channel, 6 // purinergic receptor P2X, ligand-gated ion channel, 6 // purinergic receptor P2X, ligand-gated ion channel, 6 // purinergic receptor P2X, ligand-gated ion channel, 6 // puriner…		6	5	coding	12
P2ry6	pyrimidinergic receptor P2Y, G-protein coupled, 6 // pyrimidinergic receptor P2Y, G-protein coupled, 6 // pyrimidinergic receptor P2Y, G-protein coupled, 6		2	2	coding	78
P4hb	prolyl 4-hydroxylase, beta polypeptide // prolyl 4-hydroxylase, beta polypeptide // prolyl 4-hydroxylase, beta polypeptide // prolyl 4-hydroxylase, beta polypeptide // prolyl 4-hydroxylase, beta polypeptide // prolyl 4-hydroxylase, beta polypeptide		2	2	coding	78
Pak1	p21 protein (Cdc42/Rac)-activated kinase 1 // p21 protein (Cdc42/Rac)-activated kinase 1 // p21 protein (Cdc42/Rac)-activated kinase 1 // p21 protein (Cdc42/Rac)-activated kinase 1 // p21 protein (Cdc42/Rac)-activated kinase 1 // p21 protein (Cdc42/Rac)-activated kinase 1 // p21 protein (Cdc42/Rac)-activated kinase 1		1	1	coding	3
Palm2	paralemmin 2 // paralemmin 2		2	1	coding	3
Panx2	pannexin 2 // pannexin 2 // pannexin 2 // pannexin 2 // pannexin 2 // pannexin 2 // pannexin 2 // pannexin 2		2	2	coding	12
Parm1	prostate androgen-regulated mucin-like protein 1 // prostate androgen-regulated mucin-like protein 1 // prostate androgen-regulated mucin-like protein 1		5	4	coding	12
Parp12	poly (ADP-ribose) polymerase family, member 12 // poly (ADP-ribose) polymerase family, member 12 // poly (ADP-ribose) polymerase family, member 12 // poly (ADP-ribose) polymerase family, member 12 // poly (ADP-ribose) polymerase family, member 12 // poly (ADP-ribose) polymerase family, member 12		2	2	coding	78
Parp6	poly (ADP-ribose) polymerase family, member 6 // poly (ADP-ribose) polymerase family, member 6 // poly (ADP-ribose) polymerase family, member 6 // poly (ADP-ribose) polymerase family, member 6 // poly (ADP-ribose) polymerase family, member 6 // poly (ADP-ribose) polymerase family, member 6 // poly (ADP-ribose) polymerase family, member 6 // poly (ADP-ribose) polymerase family, member 6 // poly (A…		1	1	coding	3
Parp9	poly (ADP-ribose) polymerase family, member 9 // poly (ADP-ribose) polymerase family, member 9 // poly (ADP-ribose) polymerase family, member 9 // poly (ADP-ribose) polymerase family, member 9 // poly (ADP-ribose) polymerase family, member 9 // poly (ADP-ribose) polymerase family, member 9 // poly (ADP-ribose) polymerase family, member 9 // poly (ADP-ribose) polymerase family, member 9 // poly (A…		3	3	coding	78
Pcdh17	protocadherin 17 // protocadherin 17 // protocadherin 17 // protocadherin 17		4	3	coding	12
Pcdhb15	protocadherin beta 15 // protocadherin beta 15 // protocadherin beta 15 // protocadherin beta 15 // protocadherin beta 15 // protocadherin beta 15		7	4	coding	12
Pcdhb3	protocadherin beta 3 // protocadherin beta 3 // protocadherin beta 3 // protocadherin beta 3 // protocadherin beta 3 // protocadherin beta 3		5	3	coding	6
Pcdhb8	protocadherin beta 8 // protocadherin beta 8 // protocadherin beta 8 // protocadherin beta 8 // protocadherin beta 8 // protocadherin beta 8 // protocadherin beta 8 // protocadherin beta 8		2	2	coding	12
Pclo	piccolo (presynaptic cytomatrix protein) // piccolo (presynaptic cytomatrix protein) // piccolo (presynaptic cytomatrix protein) // piccolo (presynaptic cytomatrix protein) // piccolo (presynaptic cytomatrix protein) // piccolo (presynaptic cytomatrix protein) // piccolo (presynaptic cytomatrix protein) // piccolo (presynaptic cytomatrix protein) // piccolo (presynaptic cytomatrix protein) // pic…		3	3	coding	12
Pcnxl2	pecanex-like 2 (Drosophila) // pecanex-like 2 (Drosophila) // pecanex-like 2 (Drosophila) // pecanex-like 2 (Drosophila) // pecanex-like 2 (Drosophila) // pecanex-like 2 (Drosophila) // pecanex-like 2 (Drosophila) // pecanex-like 2 (Drosophila) // pecanex-like 2 (Drosophila)		4	4	coding	12
Pcp4l1	Purkinje cell protein 4-like 1 // Purkinje cell protein 4-like 1 // Purkinje cell protein 4-like 1 // Purkinje cell protein 4-like 1 // Purkinje cell protein 4-like 1 // Purkinje cell protein 4-like 1		1	1	coding	30
Pcsk1	proprotein convertase subtilisin/kexin type 1 // proprotein convertase subtilisin/kexin type 1 // proprotein convertase subtilisin/kexin type 1 // proprotein convertase subtilisin/kexin type 1 // proprotein convertase subtilisin/kexin type 1 // proprotein convertase subtilisin/kexin type 1 // proprotein convertase subtilisin/kexin type 1		3	3	coding	12
Pcsk1n	proprotein convertase subtilisin/kexin type 1 inhibitor // proprotein convertase subtilisin/kexin type 1 inhibitor // proprotein convertase subtilisin/kexin type 1 inhibitor // proprotein convertase subtilisin/kexin type 1 inhibitor // proprotein convertase subtilisin/kexin type 1 inhibitor // proprotein convertase subtilisin/kexin type 1 inhibitor // proprotein convertase subtilisin/kexin type 1…		1	1	coding	12
Pcsk2	proprotein convertase subtilisin/kexin type 2 // proprotein convertase subtilisin/kexin type 2 // proprotein convertase subtilisin/kexin type 2		1	1	coding	30
Pcx	pyruvate carboxylase // pyruvate carboxylase // pyruvate carboxylase // pyruvate carboxylase // pyruvate carboxylase // pyruvate carboxylase // pyruvate carboxylase // pyruvate carboxylase // pyruvate carboxylase // pyruvate carboxylase // pyruvate carboxylase // pyruvate carboxylase		2	2	coding	12
Pcyt1b	phosphate cytidylyltransferase 1, choline, beta isoform // phosphate cytidylyltransferase 1, choline, beta isoform // phosphate cytidylyltransferase 1, choline, beta isoform // phosphate cytidylyltransferase 1, choline, beta isoform // phosphate cytidylyltransferase 1, choline, beta isoform		1	1	coding	30
Pcyt2	phosphate cytidylyltransferase 2, ethanolamine // phosphate cytidylyltransferase 2, ethanolamine // phosphate cytidylyltransferase 2, ethanolamine // phosphate cytidylyltransferase 2, ethanolamine // phosphate cytidylyltransferase 2, ethanolamine // phosphate cytidylyltransferase 2, ethanolamine // phosphate cytidylyltransferase 2, ethanolamine // phosphate cytidylyltransferase 2, ethanolamine //…		5	3	coding	30
Pde10a	phosphodiesterase 10A // phosphodiesterase 10A // phosphodiesterase 10A // phosphodiesterase 10A // phosphodiesterase 10A		2	2	coding	12
Pde4a	phosphodiesterase 4A, cAMP specific // phosphodiesterase 4A, cAMP specific // phosphodiesterase 4A, cAMP specific // phosphodiesterase 4A, cAMP specific // phosphodiesterase 4A, cAMP specific // phosphodiesterase 4A, cAMP specific // phosphodiesterase 4A, cAMP specific // phosphodiesterase 4A, cAMP specific // phosphodiesterase 4A, cAMP specific // phosphodiesterase 4A, cAMP specific // phosphodi…		3	3	coding	12
Pde8b	phosphodiesterase 8B // phosphodiesterase 8B // phosphodiesterase 8B // phosphodiesterase 8B // phosphodiesterase 8B // phosphodiesterase 8B		1	1	coding	12
Peg3	paternally expressed 3 // paternally expressed 3 // paternally expressed 3 // paternally expressed 3 // paternally expressed 3 // paternally expressed 3 // paternally expressed 3 // paternally expressed 3 // paternally expressed 3 // paternally expressed 3 // paternally expressed 3 // paternally expressed 3 // paternally expressed 3 // paternally expressed 3 // paternally expressed 3 // paternall…		1	1	coding	3
Peli3	pellino 3 // pellino 3 // pellino 3 // pellino 3 // pellino 3 // pellino 3 // pellino 3 // pellino 3 // pellino 3 // pellino 3 // pellino 3 // pellino 3 // pellino 3 // pellino 3 // pellino 3		3	3	coding	12
Pfkm	phosphofructokinase, muscle // phosphofructokinase, muscle // phosphofructokinase, muscle // phosphofructokinase, muscle // phosphofructokinase, muscle // phosphofructokinase, muscle // phosphofructokinase, muscle // phosphofructokinase, muscle // phosphofructokinase, muscle // phosphofructokinase, muscle // phosphofructokinase, muscle // phosphofructokinase, muscle // phosphofructokinase, muscle…		3	3	coding	12
Pfn2	profilin 2 // profilin 2 // profilin 2 // profilin 2 // profilin 2 // profilin 2 // profilin 2		2	2	coding	12
Pgbd5	piggyBac transposable element derived 5 // piggyBac transposable element derived 5 // piggyBac transposable element derived 5 // piggyBac transposable element derived 5 // piggyBac transposable element derived 5 // piggyBac transposable element derived 5 // piggyBac transposable element derived 5		1	1	coding	3
Pgd	phosphogluconate dehydrogenase // phosphogluconate dehydrogenase // phosphogluconate dehydrogenase // phosphogluconate dehydrogenase // phosphogluconate dehydrogenase // phosphogluconate dehydrogenase // phosphogluconate dehydrogenase // phosphogluconate dehydrogenase // phosphogluconate dehydrogenase		3	3	coding	78
Pgm2l1	phosphoglucomutase 2-like 1 // phosphoglucomutase 2-like 1 // phosphoglucomutase 2-like 1 // phosphoglucomutase 2-like 1 // phosphoglucomutase 2-like 1 // glutathione peroxidase 2, pseudogene 1 // phosphoglucomutase 2-like 1 // phosphoglucomutase 2-like 1 // phosphoglucomutase 2-like 1 // phosphoglucomutase 2-like 1		2	2	coding	6
Pgr	progesterone receptor // progesterone receptor // progesterone receptor // progesterone receptor // progesterone receptor // progesterone receptor // progesterone receptor		4	4	coding	12
Phactr1	phosphatase and actin regulator 1 // phosphatase and actin regulator 1 // phosphatase and actin regulator 1 // phosphatase and actin regulator 1 // phosphatase and actin regulator 1 // phosphatase and actin regulator 1 // phosphatase and actin regulator 1 // phosphatase and actin regulator 1 // phosphatase and actin regulator 1		2	2	coding	12
Phactr3	phosphatase and actin regulator 3 // phosphatase and actin regulator 3 // phosphatase and actin regulator 3 // phosphatase and actin regulator 3 // phosphatase and actin regulator 3 // phosphatase and actin regulator 3 // phosphatase and actin regulator 3 // phosphatase and actin regulator 3 // phosphatase and actin regulator 3 // phosphatase and actin regulator 3 // phosphatase and actin regulat…		1	1	coding	12
Phospho1	phosphatase, orphan 1 // phosphatase, orphan 1 // ABI gene family, member 3 // ABI gene family, member 3 // ABI gene family, member 3 // phosphatase, orphan 1 // phosphatase, orphan 1 // ABI gene family, member 3 // ABI gene family, member 3 // ABI gene family, member 3 // zinc finger protein 652 // ABI gene family, member 3 // phosphatase, orphan 1 // zinc finger protein 652 // ABI gene family, …		3	3	coding	12
Phyhip	phytanoyl-CoA hydroxylase interacting protein // phytanoyl-CoA hydroxylase interacting protein // phytanoyl-CoA hydroxylase interacting protein // phytanoyl-CoA hydroxylase interacting protein // phytanoyl-CoA hydroxylase interacting protein // phytanoyl-CoA hydroxylase interacting protein // phytanoyl-CoA hydroxylase interacting protein		1	1	coding	12
Pik3ap1	phosphoinositide-3-kinase adaptor protein 1 // phosphoinositide-3-kinase adaptor protein 1 // phosphoinositide-3-kinase adaptor protein 1 // phosphoinositide-3-kinase adaptor protein 1		3	3	coding	78
Pilra	paired immunoglobin-like type 2 receptor alpha // paired immunoglobin-like type 2 receptor alpha // paired immunoglobin-like type 2 receptor alpha // paired immunoglobin-like type 2 receptor alpha // paired immunoglobin-like type 2 receptor alpha // paired immunoglobin-like type 2 receptor alpha // paired immunoglobin-like type 2 receptor alpha // paired immunoglobin-like type 2 receptor alpha //…		2	2	coding	78
Pip5k1b	phosphatidylinositol-4-phosphate 5-kinase, type 1 beta // phosphatidylinositol-4-phosphate 5-kinase, type 1 beta // phosphatidylinositol-4-phosphate 5-kinase, type 1 beta // phosphatidylinositol-4-phosphate 5-kinase, type 1 beta		1	1	coding	3
Pja2	praja 2, RING-H2 motif containing // praja 2, RING-H2 motif containing // praja 2, RING-H2 motif containing // praja 2, RING-H2 motif containing // praja 2, RING-H2 motif containing // praja 2, RING-H2 motif containing // praja 2, RING-H2 motif containing		1	1	coding	12
Plac8	placenta-specific 8 // placenta-specific 8 // placenta-specific 8 // placenta-specific 8 // placenta-specific 8 // placenta-specific 8		2	2	coding	78
Plau	plasminogen activator, urokinase // plasminogen activator, urokinase // plasminogen activator, urokinase // plasminogen activator, urokinase // plasminogen activator, urokinase // plasminogen activator, urokinase		2	2	coding	78
Plaur	plasminogen activator, urokinase receptor // plasminogen activator, urokinase receptor // plasminogen activator, urokinase receptor // plasminogen activator, urokinase receptor // plasminogen activator, urokinase receptor // plasminogen activator, urokinase receptor		5	3	coding	75
Plcb4	phospholipase C, beta 4 // phospholipase C, beta 4 // phospholipase C, beta 4 // phospholipase C, beta 4 // phospholipase C, beta 4 // phospholipase C, beta 4 // phospholipase C, beta 4 // phospholipase C, beta 4 // phospholipase C, beta 4 // phospholipase C, beta 4		4	4	coding	6
Plch1	phospholipase C, eta 1 // phospholipase C, eta 1 // phospholipase C, eta 1 // phospholipase C, eta 1 // phospholipase C, eta 1 // phospholipase C, eta 1 // phospholipase C, eta 1 // phospholipase C, eta 1 // phospholipase C, eta 1 // phospholipase C, eta 1 // phospholipase C, eta 1 // phospholipase C, eta 1 // phospholipase C, eta 1 // phospholipase C, eta 1 // phospholipase C, eta 1 // phospholi…		5	5	coding	12
Plek	pleckstrin // pleckstrin // pleckstrin // pleckstrin		1	1	coding	75
Plekha6	pleckstrin homology domain containing, family A member 6 // pleckstrin homology domain containing, family A member 6 // pleckstrin homology domain containing, family A member 6 // pleckstrin homology domain containing, family A member 6 // pleckstrin homology domain containing, family A member 6 // pleckstrin homology domain containing, family A member 6 // pleckstrin homology domain containing, …		8	6	coding	12
Plekho1	pleckstrin homology domain containing, family O member 1 // pleckstrin homology domain containing, family O member 1 // pleckstrin homology domain containing, family O member 1		2	2	coding	78
Plin2	perilipin 2 // perilipin 2 // perilipin 2 // perilipin 2 // perilipin 2 // perilipin 2 // perilipin 2		3	3	coding	75
Plxna4	plexin A4 // plexin A4 // plexin A4 // plexin A4		2	2	coding	6
Pnck	pregnancy upregulated non-ubiquitously expressed CaM kinase // pregnancy upregulated non-ubiquitously expressed CaM kinase // pregnancy upregulated non-ubiquitously expressed CaM kinase // pregnancy upregulated non-ubiquitously expressed CaM kinase // pregnancy upregulated non-ubiquitously expressed CaM kinase // pregnancy upregulated non-ubiquitously expressed CaM kinase // pregnancy upregulated…		4	4	coding	12
Pnma2	paraneoplastic antigen MA2 // paraneoplastic antigen MA2 // paraneoplastic antigen MA2 // paraneoplastic antigen MA2 // paraneoplastic antigen MA2 // paraneoplastic antigen MA2 // paraneoplastic antigen MA2 // paraneoplastic antigen MA2 // paraneoplastic antigen MA2 // paraneoplastic antigen MA2 // paraneoplastic antigen MA2		4	3	coding	12
Podxl2	podocalyxin-like 2 // podocalyxin-like 2 // podocalyxin-like 2 // podocalyxin-like 2 // podocalyxin-like 2 // podocalyxin-like 2 // podocalyxin-like 2		3	2	coding	6
Ppargc1a	peroxisome proliferative activated receptor, gamma, coactivator 1 alpha // peroxisome proliferative activated receptor, gamma, coactivator 1 alpha // peroxisome proliferative activated receptor, gamma, coactivator 1 alpha // peroxisome proliferative activated receptor, gamma, coactivator 1 alpha // peroxisome proliferative activated receptor, gamma, coactivator 1 alpha		5	3	coding	6
Ppfia2	protein tyrosine phosphatase, receptor type, f polypeptide (PTPRF), interacting protein (liprin), alpha 2 // protein tyrosine phosphatase, receptor type, f polypeptide (PTPRF), interacting protein (liprin), alpha 2 // protein tyrosine phosphatase, receptor type, f polypeptide (PTPRF), interacting protein (liprin), alpha 2 // protein tyrosine phosphatase, receptor type, f polypeptide (PTPRF), inte…		3	3	coding	12
Ppfia3	protein tyrosine phosphatase, receptor type, f polypeptide (PTPRF), interacting protein (liprin), alpha 3 // protein tyrosine phosphatase, receptor type, f polypeptide (PTPRF), interacting protein (liprin), alpha 3 // protein tyrosine phosphatase, receptor type, f polypeptide (PTPRF), interacting protein (liprin), alpha 3 // protein tyrosine phosphatase, receptor type, f polypeptide (PTPRF), inte…		1	1	coding	12
Ppfibp1	PTPRF interacting protein, binding protein 1 (liprin beta 1) // PTPRF interacting protein, binding protein 1 (liprin beta 1) // PTPRF interacting protein, binding protein 1 (liprin beta 1) // PTPRF interacting protein, binding protein 1 (liprin beta 1) // PTPRF interacting protein, binding protein 1 (liprin beta 1) // PTPRF interacting protein, binding protein 1 (liprin beta 1) // PTPRF interacti…		3	3	coding	78
Ppip5k1	diphosphoinositol pentakisphosphate kinase 1 // diphosphoinositol pentakisphosphate kinase 1 // diphosphoinositol pentakisphosphate kinase 1 // diphosphoinositol pentakisphosphate kinase 1 // diphosphoinositol pentakisphosphate kinase 1 // diphosphoinositol pentakisphosphate kinase 1 // diphosphoinositol pentakisphosphate kinase 1 // diphosphoinositol pentakisphosphate kinase 1 // diphosphoinosit…		4	3	coding	6
Ppm1e	protein phosphatase 1E (PP2C domain containing) // protein phosphatase 1E (PP2C domain containing) // protein phosphatase 1E (PP2C domain containing)		2	2	coding	6
Ppm1k	protein phosphatase 1K (PP2C domain containing) // protein phosphatase 1K (PP2C domain containing) // protein phosphatase 1K (PP2C domain containing) // protein phosphatase 1K (PP2C domain containing)		4	2	coding	12
Ppp1r13b	protein phosphatase 1, regulatory (inhibitor) subunit 13B // protein phosphatase 1, regulatory (inhibitor) subunit 13B // protein phosphatase 1, regulatory (inhibitor) subunit 13B // protein phosphatase 1, regulatory (inhibitor) subunit 13B // protein phosphatase 1, regulatory (inhibitor) subunit 13B // protein phosphatase 1, regulatory (inhibitor) subunit 13B		2	2	coding	6
Ppp1r9a	protein phosphatase 1, regulatory (inhibitor) subunit 9A // protein phosphatase 1, regulatory (inhibitor) subunit 9A // protein phosphatase 1, regulatory (inhibitor) subunit 9A // protein phosphatase 1, regulatory (inhibitor) subunit 9A // protein phosphatase 1, regulatory (inhibitor) subunit 9A		4	3	coding	6
Ppp4r4	protein phosphatase 4, regulatory subunit 4 // protein phosphatase 4, regulatory subunit 4 // protein phosphatase 4, regulatory subunit 4 // protein phosphatase 4, regulatory subunit 4 // protein phosphatase 4, regulatory subunit 4 // protein phosphatase 4, regulatory subunit 4 // protein phosphatase 4, regulatory subunit 4 // protein phosphatase 4, regulatory subunit 4		2	2	coding	12
Pppde2	PPPDE peptidase domain containing 2 // PPPDE peptidase domain containing 2 // X-ray repair complementing defective repair in Chinese hamster cells 6 // PPPDE peptidase domain containing 2 // PPPDE peptidase domain containing 2 // PPPDE peptidase domain containing 2 // PPPDE peptidase domain containing 2 // PPPDE peptidase domain containing 2 // PPPDE peptidase domain containing 2		2	2	coding	3
Prepl	prolyl endopeptidase-like // prolyl endopeptidase-like // prolyl endopeptidase-like // prolyl endopeptidase-like // prolyl endopeptidase-like // prolyl endopeptidase-like // prolyl endopeptidase-like // prolyl endopeptidase-like // prolyl endopeptidase-like // prolyl endopeptidase-like // prolyl endopeptidase-like // prolyl endopeptidase-like // prolyl endopeptidase-like // prolyl endopeptidase-l…		2	2	coding	30
Prkaa2	protein kinase, AMP-activated, alpha 2 catalytic subunit // protein kinase, AMP-activated, alpha 2 catalytic subunit // protein kinase, AMP-activated, alpha 2 catalytic subunit // protein kinase, AMP-activated, alpha 2 catalytic subunit		3	2	coding	12
Prmt8	protein arginine N-methyltransferase 8 // protein arginine N-methyltransferase 8 // protein arginine N-methyltransferase 8		4	3	coding	6
Prph	peripherin // peripherin // peripherin // peripherin // peripherin // peripherin // peripherin // peripherin // peripherin // peripherin // peripherin // peripherin		1	1	coding	3
Prrt1	proline-rich transmembrane protein 1 // proline-rich transmembrane protein 1 // proline-rich transmembrane protein 1 // proline-rich transmembrane protein 1 // proline-rich transmembrane protein 1		2	2	coding	12
Psd	pleckstrin and Sec7 domain containing // pleckstrin and Sec7 domain containing // pleckstrin and Sec7 domain containing // pleckstrin and Sec7 domain containing // pleckstrin and Sec7 domain containing // pleckstrin and Sec7 domain containing // pleckstrin and Sec7 domain containing		4	3	coding	12
Ptbp1	polypyrimidine tract binding protein 1 // polypyrimidine tract binding protein 1 // polypyrimidine tract binding protein 1 // polypyrimidine tract binding protein 1 // polypyrimidine tract binding protein 1 // polypyrimidine tract binding protein 1 // polypyrimidine tract binding protein 1 // polypyrimidine tract binding protein 1 // polypyrimidine tract binding protein 1 // polypyrimidine tract …		1	1	coding	51
Ptprn2	protein tyrosine phosphatase, receptor type, N polypeptide 2 // protein tyrosine phosphatase, receptor type, N polypeptide 2		1	1	coding	12
Ptprt	protein tyrosine phosphatase, receptor type, T // protein tyrosine phosphatase, receptor type, T // protein tyrosine phosphatase, receptor type, T // protein tyrosine phosphatase, receptor type, T // protein tyrosine phosphatase, receptor type, T // protein tyrosine phosphatase, receptor type, T		8	5	coding	12
Rab39b	RAB39B, member RAS oncogene family // RAB39B, member RAS oncogene family // RAB39B, member RAS oncogene family // RAB39B, member RAS oncogene family // RAB39B, member RAS oncogene family // RAB39B, member RAS oncogene family		2	2	coding	30
Rab3a	RAB3A, member RAS oncogene family // RAB3A, member RAS oncogene family // RAB3A, member RAS oncogene family // RAB3A, member RAS oncogene family // RAB3A, member RAS oncogene family // RAB3A, member RAS oncogene family // RAB3A, member RAS oncogene family // RAB3A, member RAS oncogene family // RAB3A, member RAS oncogene family // RAB3A, member RAS oncogene family // RAB3A, member RAS oncogene fa…		1	1	coding	30
Rab3b	RAB3B, member RAS oncogene family // RAB3B, member RAS oncogene family // RAB3B, member RAS oncogene family // RAB3B, member RAS oncogene family // RAB3B, member RAS oncogene family		2	2	coding	6
Rab3c	RAB3C, member RAS oncogene family		2	2	coding	12
Rab8b	RAB8B, member RAS oncogene family // RAB8B, member RAS oncogene family // RAB8B, member RAS oncogene family // RAB8B, member RAS oncogene family		1	1	coding	78
Rac2	RAS-related C3 botulinum substrate 2 // RAS-related C3 botulinum substrate 2 // RAS-related C3 botulinum substrate 2 // RAS-related C3 botulinum substrate 2 // RAS-related C3 botulinum substrate 2 // RAS-related C3 botulinum substrate 2		1	1	coding	78
Ranbp6	RAN binding protein 6 // RAN binding protein 6 // RAN binding protein 6 // RAN binding protein 6 // RAN binding protein 6 // RAN binding protein 6		3	3	coding	12
Rap1b	RAS related protein 1b // RAS related protein 1b // RAS related protein 1b		1	1	coding	75
Rap1gap	Rap1 GTPase-activating protein // Rap1 GTPase-activating protein // Rap1 GTPase-activating protein // Rap1 GTPase-activating protein // Rap1 GTPase-activating protein // Rap1 GTPase-activating protein // Rap1 GTPase-activating protein // Rap1 GTPase-activating protein // Rap1 GTPase-activating protein // Rap1 GTPase-activating protein // Rap1 GTPase-activating protein // Rap1 GTPase-activating pr…		3	2	coding	6
Rasgrf1	RAS protein-specific guanine nucleotide-releasing factor 1 // RAS protein-specific guanine nucleotide-releasing factor 1 // RAS protein-specific guanine nucleotide-releasing factor 1 // RAS protein-specific guanine nucleotide-releasing factor 1 // RAS protein-specific guanine nucleotide-releasing factor 1 // RAS protein-specific guanine nucleotide-releasing factor 1		1	1	coding	30
Rcan2	regulator of calcineurin 2 // regulator of calcineurin 2 // regulator of calcineurin 2 // regulator of calcineurin 2 // regulator of calcineurin 2		1	1	coding	30
Rdh10	retinol dehydrogenase 10 (all-trans) // retinol dehydrogenase 10 (all-trans) // retinol dehydrogenase 10 (all-trans) // retinol dehydrogenase 10 (all-trans) // retinol dehydrogenase 10 (all-trans)		2	2	coding	75
Reep1	receptor accessory protein 1 // receptor accessory protein 1 // receptor accessory protein 1		2	2	coding	12
Reep2	receptor accessory protein 2 // receptor accessory protein 2 // receptor accessory protein 2 // receptor accessory protein 2 // receptor accessory protein 2 // receptor accessory protein 2 // receptor accessory protein 2 // receptor accessory protein 2		1	1	coding	30
Reep6	receptor accessory protein 6 // receptor accessory protein 6 // receptor accessory protein 6 // receptor accessory protein 6 // receptor accessory protein 6 // receptor accessory protein 6 // receptor accessory protein 6 // receptor accessory protein 6 // receptor accessory protein 6 // receptor accessory protein 6 // receptor accessory protein 6		3	3	coding	12
Rell2	RELT-like 2 // RELT-like 2 // RELT-like 2 // RELT-like 2 // FCH and double SH3 domains 1 // FCH and double SH3 domains 1 // RELT-like 2 // RELT-like 2 // RELT-like 2 // RELT-like 2 // FCH and double SH3 domains 1 // FCH and double SH3 domains 1 // RELT-like 2 // FCH and double SH3 domains 1 // RELT-like 2 // FCH and double SH3 domains 1 // RELT-like 2 // FCH and double SH3 domains 1 // RELT-like …		1	1	coding	30
Resp18	regulated endocrine-specific protein 18 // regulated endocrine-specific protein 18 // regulated endocrine-specific protein 18 // regulated endocrine-specific protein 18 // regulated endocrine-specific protein 18 // regulated endocrine-specific protein 18 // regulated endocrine-specific protein 18 // regulated endocrine-specific protein 18		2	2	coding	12
Rgnef	Rho-guanine nucleotide exchange factor // Rho-guanine nucleotide exchange factor // Rho-guanine nucleotide exchange factor // Rho-guanine nucleotide exchange factor // Rho-guanine nucleotide exchange factor // Rho-guanine nucleotide exchange factor // Rho-guanine nucleotide exchange factor // Rho-guanine nucleotide exchange factor // Rho-guanine nucleotide exchange factor		5	2	coding	12
Rgs4	regulator of G-protein signaling 4 // regulator of G-protein signaling 4 // regulator of G-protein signaling 4 // regulator of G-protein signaling 4		1	1	coding	30
Rgs7bp	regulator of G-protein signalling 7 binding protein // regulator of G-protein signalling 7 binding protein // regulator of G-protein signalling 7 binding protein		1	1	coding	3
Rhbdd2	rhomboid domain containing 2 // rhomboid domain containing 2 // rhomboid domain containing 2 // rhomboid domain containing 2 // rhomboid domain containing 2 // rhomboid domain containing 2 // rhomboid domain containing 2 // rhomboid domain containing 2 // rhomboid domain containing 2 // rhomboid domain containing 2 // rhomboid domain containing 2		4	3	coding	12
Rhbdl1	rhomboid, veinlet-like 1 (Drosophila) // rhomboid, veinlet-like 1 (Drosophila) // rhomboid, veinlet-like 1 (Drosophila) // rhomboid, veinlet-like 1 (Drosophila) // rhomboid, veinlet-like 1 (Drosophila) // rhomboid, veinlet-like 1 (Drosophila)		6	6	coding	12
Rimkla	ribosomal modification protein rimK-like family member A // ribosomal modification protein rimK-like family member A // ribosomal modification protein rimK-like family member A // ribosomal modification protein rimK-like family member A		2	2	coding	12
Rims1	regulating synaptic membrane exocytosis 1 // regulating synaptic membrane exocytosis 1 // regulating synaptic membrane exocytosis 1 // regulating synaptic membrane exocytosis 1 // regulating synaptic membrane exocytosis 1 // regulating synaptic membrane exocytosis 1		1	1	coding	12
Ripk1	receptor (TNFRSF)-interacting serine-threonine kinase 1 // receptor (TNFRSF)-interacting serine-threonine kinase 1 // receptor (TNFRSF)-interacting serine-threonine kinase 1 // receptor (TNFRSF)-interacting serine-threonine kinase 1 // receptor (TNFRSF)-interacting serine-threonine kinase 1 // receptor (TNFRSF)-interacting serine-threonine kinase 1 // receptor (TNFRSF)-interacting serine-threonin…		2	2	coding	78
Rnf213	ring finger protein 213 // ring finger protein 213 // ring finger protein 213 // ring finger protein 213 // ring finger protein 213 // ring finger protein 213		2	2	coding	78
Rnf32	ring finger protein 32 // ring finger protein 32 // ring finger protein 32 // ring finger protein 32 // ring finger protein 32 // ring finger protein 32 // ring finger protein 32 // ring finger protein 32		4	3	coding	12
Rnh1	ribonuclease/angiogenin inhibitor 1 // ribonuclease/angiogenin inhibitor 1 // ribonuclease/angiogenin inhibitor 1 // ribonuclease/angiogenin inhibitor 1 // ribonuclease/angiogenin inhibitor 1 // ribonuclease/angiogenin inhibitor 1 // ribonuclease/angiogenin inhibitor 1 // ribonuclease/angiogenin inhibitor 1 // ribonuclease/angiogenin inhibitor 1 // ribonuclease/angiogenin inhibitor 1		3	3	coding	75
Robo2	roundabout homolog 2 (Drosophila)		4	3	coding	6
Rod1	ROD1 regulator of differentiation 1 (S. pombe) // ROD1 regulator of differentiation 1 (S. pombe) // ROD1 regulator of differentiation 1 (S. pombe) // ROD1 regulator of differentiation 1 (S. pombe) // ROD1 regulator of differentiation 1 (S. pombe) // ROD1 regulator of differentiation 1 (S. pombe) // ROD1 regulator of differentiation 1 (S. pombe) // ROD1 regulator of differentiation 1 (S. pombe) //…		3	3	coding	78
Rogdi	rogdi homolog (Drosophila) // rogdi homolog (Drosophila) // rogdi homolog (Drosophila) // rogdi homolog (Drosophila) // rogdi homolog (Drosophila) // rogdi homolog (Drosophila) // rogdi homolog (Drosophila)		5	5	coding	6
Rph3a	rabphilin 3A // rabphilin 3A // rabphilin 3A // rabphilin 3A // rabphilin 3A // rabphilin 3A		1	1	coding	30
Rpl10a	ribosomal protein L10A // ribosomal protein L10A // ribosomal protein L10A // ribosomal protein L10A // ribosomal protein L10A // ribosomal protein L10A // ribosomal protein L10A // ribosomal protein L10A // ribosomal protein L10A // ribosomal protein L10A // ribosomal protein L10A // ribosomal protein L10A // ribosomal protein L10A // ribosomal protein L10A // ribosomal protein L10A // ribosomal…		6	3	coding	75
Rpp25	ribonuclease P 25 subunit (human) // ribonuclease P 25 subunit (human) // ribonuclease P 25 subunit (human) // ribonuclease P 25 subunit (human) // ribonuclease P 25 subunit (human) // ribonuclease P 25 subunit (human)		1	1	coding	12
Rprd1a	regulation of nuclear pre-mRNA domain containing 1A // regulation of nuclear pre-mRNA domain containing 1A // regulation of nuclear pre-mRNA domain containing 1A // regulation of nuclear pre-mRNA domain containing 1A // regulation of nuclear pre-mRNA domain containing 1A		9	6	coding	12
Rps20	ribosomal protein S20 // ribosomal protein S20 // ribosomal protein S20 // ribosomal protein S20 // ribosomal protein S20 // ribosomal protein S20 // ribosomal protein S20 // ribosomal protein S20 // ribosomal protein S20 // ribosomal protein S20 // ribosomal protein S20 // ribosomal protein S20		2	2	coding	75
Rps27l	ribosomal protein S27-like // ribosomal protein S27-like // ribosomal protein S27-like // ribosomal protein S27-like // ribosomal protein S27-like // ribosomal protein S27-like // ribosomal protein S27-like // ribosomal protein S27-like // ribosomal protein S27-like		3	3	coding	67
Rps6ka2	ribosomal protein S6 kinase, polypeptide 2 // ribosomal protein S6 kinase, polypeptide 2 // ribosomal protein S6 kinase, polypeptide 2 // ribosomal protein S6 kinase, polypeptide 2		5	3	coding	12
Rtn1	reticulon 1 // reticulon 1 // reticulon 1 // reticulon 1 // reticulon 1 // reticulon 1		3	3	coding	3
Rtn2	reticulon 2 (Z-band associated protein) // reticulon 2 (Z-band associated protein) // reticulon 2 (Z-band associated protein) // reticulon 2 (Z-band associated protein) // reticulon 2 (Z-band associated protein) // reticulon 2 (Z-band associated protein) // reticulon 2 (Z-band associated protein) // reticulon 2 (Z-band associated protein)		2	2	coding	30
Rufy3	RUN and FYVE domain containing 3 // RUN and FYVE domain containing 3 // RUN and FYVE domain containing 3 // RUN and FYVE domain containing 3 // RUN and FYVE domain containing 3 // RUN and FYVE domain containing 3 // RUN and FYVE domain containing 3		1	1	coding	30
Rundc3b	RUN domain containing 3B // RUN domain containing 3B // RUN domain containing 3B // RUN domain containing 3B // RUN domain containing 3B		3	3	coding	3
Runx1t1	runt-related transcription factor 1; translocated to, 1 (cyclin D-related) // runt-related transcription factor 1; translocated to, 1 (cyclin D-related) // runt-related transcription factor 1; translocated to, 1 (cyclin D-related) // runt-related transcription factor 1; translocated to, 1 (cyclin D-related) // runt-related transcription factor 1; translocated to, 1 (cyclin D-related) // runt-rela…		3	3	coding	6
Rusc1	RUN and SH3 domain containing 1 // RUN and SH3 domain containing 1 // RUN and SH3 domain containing 1 // RUN and SH3 domain containing 1 // RUN and SH3 domain containing 1 // RUN and SH3 domain containing 1 // RUN and SH3 domain containing 1 // RUN and SH3 domain containing 1 // RUN and SH3 domain containing 1 // RUN and SH3 domain containing 1 // RUN and SH3 domain containing 1 // RUN and SH3 do…		6	4	coding	12
Ryr2	ryanodine receptor 2, cardiac // ryanodine receptor 2, cardiac		4	3	coding	12
S100a4	S100 calcium binding protein A4 // S100 calcium binding protein A4 // S100 calcium binding protein A4 // S100 calcium binding protein A4 // S100 calcium binding protein A4 // S100 calcium binding protein A4 // S100 calcium binding protein A4 // S100 calcium binding protein A4 // S100 calcium binding protein A4		2	2	coding	78
S1pr5	sphingosine-1-phosphate receptor 5 // sphingosine-1-phosphate receptor 5 // sphingosine-1-phosphate receptor 5 // sphingosine-1-phosphate receptor 5 // sphingosine-1-phosphate receptor 5 // sphingosine-1-phosphate receptor 5		2	2	coding	30
Sacs	sacsin // sacsin // sacsin // sacsin // sacsin // sacsin // sacsin // sacsin // sacsin // sacsin // sacsin		3	3	coding	6
Sall2	sal-like 2 (Drosophila) // sal-like 2 (Drosophila) // sal-like 2 (Drosophila) // sal-like 2 (Drosophila) // sal-like 2 (Drosophila) // sal-like 2 (Drosophila) // sal-like 2 (Drosophila) // sal-like 2 (Drosophila) // sal-like 2 (Drosophila)		4	3	coding	6
Samhd1	SAM domain and HD domain, 1 // SAM domain and HD domain, 1 // SAM domain and HD domain, 1 // SAM domain and HD domain, 1 // SAM domain and HD domain, 1 // SAM domain and HD domain, 1 // SAM domain and HD domain, 1 // SAM domain and HD domain, 1 // SAM domain and HD domain, 1 // SAM domain and HD domain, 1		1	1	coding	78
Samsn1	SAM domain, SH3 domain and nuclear localization signals, 1 // SAM domain, SH3 domain and nuclear localization signals, 1 // SAM domain, SH3 domain and nuclear localization signals, 1 // SAM domain, SH3 domain and nuclear localization signals, 1 // SAM domain, SH3 domain and nuclear localization signals, 1 // SAM domain, SH3 domain and nuclear localization signals, 1 // SAM domain, SH3 domain and …		3	3	coding	78
Sarm1	sterile alpha and HEAT/Armadillo motif containing 1 // sterile alpha and HEAT/Armadillo motif containing 1 // sterile alpha and HEAT/Armadillo motif containing 1 // sterile alpha and HEAT/Armadillo motif containing 1 // sterile alpha and HEAT/Armadillo motif containing 1 // sterile alpha and HEAT/Armadillo motif containing 1 // sterile alpha and HEAT/Armadillo motif containing 1 // sterile alpha …		2	2	coding	12
Satb1	special AT-rich sequence binding protein 1 // special AT-rich sequence binding protein 1 // special AT-rich sequence binding protein 1 // special AT-rich sequence binding protein 1 // special AT-rich sequence binding protein 1 // special AT-rich sequence binding protein 1		2	2	coding	6
Scamp5	secretory carrier membrane protein 5 // secretory carrier membrane protein 5 // secretory carrier membrane protein 5 // secretory carrier membrane protein 5 // secretory carrier membrane protein 5 // secretory carrier membrane protein 5		1	1	coding	12
Sccpdh	saccharopine dehydrogenase (putative) // saccharopine dehydrogenase (putative) // saccharopine dehydrogenase (putative) // saccharopine dehydrogenase (putative) // saccharopine dehydrogenase (putative) // saccharopine dehydrogenase (putative) // saccharopine dehydrogenase (putative) // saccharopine dehydrogenase (putative) // saccharopine dehydrogenase (putative) // saccharopine dehydrogenase (pu…		2	2	coding	12
Scd1	stearoyl-Coenzyme A desaturase 1 // stearoyl-Coenzyme A desaturase 1 // stearoyl-Coenzyme A desaturase 1		1	1	coding	6
Scn2b	sodium channel, voltage-gated, type II, beta // sodium channel, voltage-gated, type II, beta // sodium channel, voltage-gated, type II, beta // sodium channel, voltage-gated, type II, beta // sodium channel, voltage-gated, type II, beta // sodium channel, voltage-gated, type II, beta // sodium channel, voltage-gated, type II, beta // sodium channel, voltage-gated, type II, beta		1	1	coding	12
Scn3b	sodium channel, voltage-gated, type III, beta // sodium channel, voltage-gated, type III, beta // sodium channel, voltage-gated, type III, beta // sodium channel, voltage-gated, type III, beta // sodium channel, voltage-gated, type III, beta // sodium channel, voltage-gated, type III, beta // sodium channel, voltage-gated, type III, beta // sodium channel, voltage-gated, type III, beta // sodium …		2	1	coding	12
Scn8a	sodium channel, voltage-gated, type VIII, alpha // sodium channel, voltage-gated, type VIII, alpha // sodium channel, voltage-gated, type VIII, alpha // sodium channel, voltage-gated, type VIII, alpha // sodium channel, voltage-gated, type VIII, alpha // sodium channel, voltage-gated, type VIII, alpha // sodium channel, voltage-gated, type VIII, alpha // sodium channel, voltage-gated, type VIII, …		1	1	coding	3
Scrn1	secernin 1 // secernin 1 // secernin 1		1	1	coding	12
Scrt1	scratch homolog 1, zinc finger protein (Drosophila) // scratch homolog 1, zinc finger protein (Drosophila) // scratch homolog 1, zinc finger protein (Drosophila) // scratch homolog 1, zinc finger protein (Drosophila) // scratch homolog 1, zinc finger protein (Drosophila) // scratch homolog 1, zinc finger protein (Drosophila) // scratch homolog 1, zinc finger protein (Drosophila) // scratch homolo…		3	2	coding	12
Sdf2l1	stromal cell-derived factor 2-like 1 // stromal cell-derived factor 2-like 1 // stromal cell-derived factor 2-like 1 // stromal cell-derived factor 2-like 1 // stromal cell-derived factor 2-like 1 // stromal cell-derived factor 2-like 1		6	3	coding	75
Sdr39u1	short chain dehydrogenase/reductase family 39U, member 1 // short chain dehydrogenase/reductase family 39U, member 1 // short chain dehydrogenase/reductase family 39U, member 1 // short chain dehydrogenase/reductase family 39U, member 1 // short chain dehydrogenase/reductase family 39U, member 1 // short chain dehydrogenase/reductase family 39U, member 1 // KH and NYN domain containing // short c…		2	2	coding	12
Sec14l2	SEC14-like 2 (S. cerevisiae) // SEC14-like 2 (S. cerevisiae) // SEC14-like 2 (S. cerevisiae) // SEC14-like 2 (S. cerevisiae) // SEC14-like 2 (S. cerevisiae) // SEC14-like 2 (S. cerevisiae) // SEC14-like 2 (S. cerevisiae) // SEC14-like 2 (S. cerevisiae) // SEC14-like 2 (S. cerevisiae)		4	3	coding	12
Sepx1	selenoprotein X 1 // selenoprotein X 1 // selenoprotein X 1 // selenoprotein X 1		1	1	coding	78
Serpinb6a	serine (or cysteine) peptidase inhibitor, clade B, member 6a // serine (or cysteine) peptidase inhibitor, clade B, member 6a // serine (or cysteine) peptidase inhibitor, clade B, member 6a // serine (or cysteine) peptidase inhibitor, clade B, member 6a // serine (or cysteine) peptidase inhibitor, clade B, member 6a // serine (or cysteine) peptidase inhibitor, clade B, member 6a // serine (or cyst…		2	2	coding	78
Sez6	seizure related gene 6 // seizure related gene 6 // seizure related gene 6 // seizure related gene 6 // seizure related gene 6 // seizure related gene 6 // seizure related gene 6 // seizure related gene 6 // seizure related gene 6 // seizure related gene 6 // seizure related gene 6 // seizure related gene 6 // seizure related gene 6 // seizure related gene 6 // seizure related gene 6		1	1	coding	12
Sez6l2	seizure related 6 homolog like 2 // seizure related 6 homolog like 2 // seizure related 6 homolog like 2 // seizure related 6 homolog like 2 // seizure related 6 homolog like 2 // seizure related 6 homolog like 2 // seizure related 6 homolog like 2 // seizure related 6 homolog like 2 // seizure related 6 homolog like 2 // seizure related 6 homolog like 2 // seizure related 6 homolog like 2 // sei…		2	2	coding	30
Sgip1	SH3-domain GRB2-like (endophilin) interacting protein 1 // SH3-domain GRB2-like (endophilin) interacting protein 1 // SH3-domain GRB2-like (endophilin) interacting protein 1 // SH3-domain GRB2-like (endophilin) interacting protein 1 // SH3-domain GRB2-like (endophilin) interacting protein 1 // SH3-domain GRB2-like (endophilin) interacting protein 1 // SH3-domain GRB2-like (endophilin) interacting…		2	2	coding	12
Sgk1	serum/glucocorticoid regulated kinase 1 // serum/glucocorticoid regulated kinase 1 // serum/glucocorticoid regulated kinase 1 // serum/glucocorticoid regulated kinase 1 // serum/glucocorticoid regulated kinase 1 // serum/glucocorticoid regulated kinase 1 // serum/glucocorticoid regulated kinase 1 // serum/glucocorticoid regulated kinase 1 // serum/glucocorticoid regulated kinase 1 // serum/glucoc…		3	3	coding	67
Sgpl1	sphingosine phosphate lyase 1 // sphingosine phosphate lyase 1 // sphingosine phosphate lyase 1 // sphingosine phosphate lyase 1 // sphingosine phosphate lyase 1 // sphingosine phosphate lyase 1 // sphingosine phosphate lyase 1 // sphingosine phosphate lyase 1 // sphingosine phosphate lyase 1 // sphingosine phosphate lyase 1 // sphingosine phosphate lyase 1		3	3	coding	78
Sgpp2	sphingosine-1-phosphate phosphotase 2 // sphingosine-1-phosphate phosphotase 2 // sphingosine-1-phosphate phosphotase 2		3	3	coding	6
Sgsm1	small G protein signaling modulator 1 // small G protein signaling modulator 1 // small G protein signaling modulator 1 // small G protein signaling modulator 1 // small G protein signaling modulator 1 // small G protein signaling modulator 1 // small G protein signaling modulator 1 // small G protein signaling modulator 1 // small G protein signaling modulator 1 // small G protein signaling modu…		1	1	coding	12
Sh3bgrl	SH3-binding domain glutamic acid-rich protein like // SH3-binding domain glutamic acid-rich protein like // SH3-binding domain glutamic acid-rich protein like // SH3-binding domain glutamic acid-rich protein like		3	3	coding	51
Sh3bp2	SH3-domain binding protein 2 // SH3-domain binding protein 2 // SH3-domain binding protein 2 // SH3-domain binding protein 2 // SH3-domain binding protein 2 // SH3-domain binding protein 2 // SH3-domain binding protein 2 // SH3-domain binding protein 2 // SH3-domain binding protein 2		2	2	coding	78
Sh3gl2	SH3-domain GRB2-like 2 // SH3-domain GRB2-like 2 // SH3-domain GRB2-like 2 // SH3-domain GRB2-like 2		2	2	coding	12
Sh3gl3	SH3-domain GRB2-like 3 // SH3-domain GRB2-like 3 // SH3-domain GRB2-like 3		3	3	coding	3
Shd	src homology 2 domain-containing transforming protein D // src homology 2 domain-containing transforming protein D // src homology 2 domain-containing transforming protein D // src homology 2 domain-containing transforming protein D // src homology 2 domain-containing transforming protein D // src homology 2 domain-containing transforming protein D // src homology 2 domain-containing transforming…		4	4	coding	6
Shisa4	shisa homolog 4 (Xenopus laevis) // shisa homolog 4 (Xenopus laevis) // shisa homolog 4 (Xenopus laevis) // shisa homolog 4 (Xenopus laevis) // shisa homolog 4 (Xenopus laevis) // shisa homolog 4 (Xenopus laevis) // shisa homolog 4 (Xenopus laevis)		2	1	coding	12
Slamf6	SLAM family member 6 // SLAM family member 6 // SLAM family member 6 // SLAM family member 6 // SLAM family member 6		1	1	coding	51
Slc17a6	solute carrier family 17 (sodium-dependent inorganic phosphate cotransporter), member 6 // solute carrier family 17 (sodium-dependent inorganic phosphate cotransporter), member 6 // solute carrier family 17 (sodium-dependent inorganic phosphate cotransporter), member 6 // solute carrier family 17 (sodium-dependent inorganic phosphate cotransporter), member 6 // solute carrier family 17 (sodium-de…		1	1	coding	30
Slc19a2	solute carrier family 19 (thiamine transporter), member 2 // solute carrier family 19 (thiamine transporter), member 2 // solute carrier family 19 (thiamine transporter), member 2 // solute carrier family 19 (thiamine transporter), member 2 // solute carrier family 19 (thiamine transporter), member 2 // solute carrier family 19 (thiamine transporter), member 2 // solute carrier family 19 (thiamin…		2	2	coding	6
Slc1a1	solute carrier family 1 (neuronal/epithelial high affinity glutamate transporter, system Xag), member 1 // solute carrier family 1 (neuronal/epithelial high affinity glutamate transporter, system Xag), member 1 // solute carrier family 1 (neuronal/epithelial high affinity glutamate transporter, system Xag), member 1 // solute carrier family 1 (neuronal/epithelial high affinity glutamate transport…		4	3	coding	6
Slc22a17	solute carrier family 22 (organic cation transporter), member 17 // solute carrier family 22 (organic cation transporter), member 17 // solute carrier family 22 (organic cation transporter), member 17 // solute carrier family 22 (organic cation transporter), member 17 // solute carrier family 22 (organic cation transporter), member 17 // solute carrier family 22 (organic cation transporter), memb…		3	3	coding	3
Slc25a24	solute carrier family 25 (mitochondrial carrier, phosphate carrier), member 24 // solute carrier family 25 (mitochondrial carrier, phosphate carrier), member 24 // solute carrier family 25 (mitochondrial carrier, phosphate carrier), member 24 // solute carrier family 25 (mitochondrial carrier, phosphate carrier), member 24 // solute carrier family 25 (mitochondrial carrier, phosphate carrier), me…		2	2	coding	78
Slc25a33	solute carrier family 25, member 33 // solute carrier family 25, member 33 // solute carrier family 25, member 33 // solute carrier family 25, member 33 // solute carrier family 25, member 33 // solute carrier family 25, member 33		1	1	coding	30
Slc27a2	solute carrier family 27 (fatty acid transporter), member 2 // solute carrier family 27 (fatty acid transporter), member 2 // solute carrier family 27 (fatty acid transporter), member 2 // solute carrier family 27 (fatty acid transporter), member 2 // solute carrier family 27 (fatty acid transporter), member 2 // solute carrier family 27 (fatty acid transporter), member 2 // solute carrier family…		1	1	coding	12
Slc2a3	solute carrier family 2 (facilitated glucose transporter), member 3 // solute carrier family 2 (facilitated glucose transporter), member 3 // solute carrier family 2 (facilitated glucose transporter), member 3 // solute carrier family 2 (facilitated glucose transporter), member 3 // solute carrier family 2 (facilitated glucose transporter), member 3		1	1	coding	3
Slc30a3	solute carrier family 30 (zinc transporter), member 3 // solute carrier family 30 (zinc transporter), member 3 // solute carrier family 30 (zinc transporter), member 3 // solute carrier family 30 (zinc transporter), member 3 // solute carrier family 30 (zinc transporter), member 3 // solute carrier family 30 (zinc transporter), member 3		2	2	coding	3
Slc35f3	solute carrier family 35, member F3 // solute carrier family 35, member F3 // solute carrier family 35, member F3		7	6	coding	12
Slc39a1	solute carrier family 39 (zinc transporter), member 1 // solute carrier family 39 (zinc transporter), member 1 // solute carrier family 39 (zinc transporter), member 1 // solute carrier family 39 (zinc transporter), member 1 // solute carrier family 39 (zinc transporter), member 1 // solute carrier family 39 (zinc transporter), member 1		1	1	coding	78
Slc45a1	solute carrier family 45, member 1 // solute carrier family 45, member 1		1	1	coding	30
Slc4a3	solute carrier family 4 (anion exchanger), member 3 // solute carrier family 4 (anion exchanger), member 3 // solute carrier family 4 (anion exchanger), member 3 // solute carrier family 4 (anion exchanger), member 3 // solute carrier family 4 (anion exchanger), member 3 // solute carrier family 4 (anion exchanger), member 3 // solute carrier family 4 (anion exchanger), member 3 // solute carrier…		7	6	coding	12
Slc5a7	solute carrier family 5 (choline transporter), member 7 // solute carrier family 5 (choline transporter), member 7 // solute carrier family 5 (choline transporter), member 7 // solute carrier family 5 (choline transporter), member 7 // solute carrier family 5 (choline transporter), member 7 // solute carrier family 5 (choline transporter), member 7		2	2	coding	3
Slc6a11	solute carrier family 6 (neurotransmitter transporter, GABA), member 11 // solute carrier family 6 (neurotransmitter transporter, GABA), member 11		3	3	coding	6
Slc6a15	solute carrier family 6 (neurotransmitter transporter), member 15 // solute carrier family 6 (neurotransmitter transporter), member 15 // solute carrier family 6 (neurotransmitter transporter), member 15 // solute carrier family 6 (neurotransmitter transporter), member 15 // solute carrier family 6 (neurotransmitter transporter), member 15 // solute carrier family 6 (neurotransmitter transporter)…		5	5	coding	12
Slc6a17	solute carrier family 6 (neurotransmitter transporter), member 17 // solute carrier family 6 (neurotransmitter transporter), member 17 // solute carrier family 6 (neurotransmitter transporter), member 17 // solute carrier family 6 (neurotransmitter transporter), member 17 // solute carrier family 6 (neurotransmitter transporter), member 17 // solute carrier family 6 (neurotransmitter transporter)…		2	2	coding	3
Slc6a9	solute carrier family 6 (neurotransmitter transporter, glycine), member 9 // solute carrier family 6 (neurotransmitter transporter, glycine), member 9 // solute carrier family 6 (neurotransmitter transporter, glycine), member 9 // solute carrier family 6 (neurotransmitter transporter, glycine), member 9 // solute carrier family 6 (neurotransmitter transporter, glycine), member 9 // solute carrier…		5	4	coding	12
Slc7a10	solute carrier family 7 (cationic amino acid transporter, y+ system), member 10 // solute carrier family 7 (cationic amino acid transporter, y+ system), member 10 // solute carrier family 7 (cationic amino acid transporter, y+ system), member 10 // solute carrier family 7 (cationic amino acid transporter, y+ system), member 10 // solute carrier family 7 (cationic amino acid transporter, y+ system…		1	1	coding	6
Slc7a3	solute carrier family 7 (cationic amino acid transporter, y+ system), member 3 // solute carrier family 7 (cationic amino acid transporter, y+ system), member 3 // solute carrier family 7 (cationic amino acid transporter, y+ system), member 3 // solute carrier family 7 (cationic amino acid transporter, y+ system), member 3 // solute carrier family 7 (cationic amino acid transporter, y+ system), m…		2	2	coding	12
Slc8a3	solute carrier family 8 (sodium/calcium exchanger), member 3 // solute carrier family 8 (sodium/calcium exchanger), member 3 // solute carrier family 8 (sodium/calcium exchanger), member 3 // solute carrier family 8 (sodium/calcium exchanger), member 3 // solute carrier family 8 (sodium/calcium exchanger), member 3		1	1	coding	3
Slc9a7	solute carrier family 9 (sodium/hydrogen exchanger), member 7 // solute carrier family 9 (sodium/hydrogen exchanger), member 7 // solute carrier family 9 (sodium/hydrogen exchanger), member 7 // solute carrier family 9 (sodium/hydrogen exchanger), member 7 // solute carrier family 9 (sodium/hydrogen exchanger), member 7 // solute carrier family 9 (sodium/hydrogen exchanger), member 7 // solute ca…		4	4	coding	6
Slco3a1	solute carrier organic anion transporter family, member 3a1 // solute carrier organic anion transporter family, member 3a1 // solute carrier organic anion transporter family, member 3a1		1	1	coding	3
Slfn2	schlafen 2 // schlafen 2 // schlafen 2 // schlafen 2 // schlafen 2 // schlafen 2		1	1	coding	67
Slit1	slit homolog 1 (Drosophila) // slit homolog 1 (Drosophila) // slit homolog 1 (Drosophila) // slit homolog 1 (Drosophila) // slit homolog 1 (Drosophila) // slit homolog 1 (Drosophila)		2	2	coding	12
Slitrk1	SLIT and NTRK-like family, member 1 // SLIT and NTRK-like family, member 1 // SLIT and NTRK-like family, member 1 // SLIT and NTRK-like family, member 1 // SLIT and NTRK-like family, member 1 // SLIT and NTRK-like family, member 1		5	5	coding	6
Slitrk3	SLIT and NTRK-like family, member 3 // SLIT and NTRK-like family, member 3 // SLIT and NTRK-like family, member 3		5	4	coding	6
Slitrk4	SLIT and NTRK-like family, member 4 // SLIT and NTRK-like family, member 4 // SLIT and NTRK-like family, member 4 // SLIT and NTRK-like family, member 4		3	3	coding	12
Slmo1	slowmo homolog 1 (Drosophila) // slowmo homolog 1 (Drosophila) // slowmo homolog 1 (Drosophila)		5	4	coding	12
Smad9	SMAD family member 9 // SMAD family member 9 // SMAD family member 9 // SMAD family member 9 // SMAD family member 9		4	3	coding	6
Smarcd3	SWI/SNF related, matrix associated, actin dependent regulator of chromatin, subfamily d, member 3 // chondroitin polymerizing factor 2 // SWI/SNF related, matrix associated, actin dependent regulator of chromatin, subfamily d, member 3 // SWI/SNF related, matrix associated, actin dependent regulator of chromatin, subfamily d, member 3 // chondroitin polymerizing factor 2 // SWI/SNF related, matri…		4	4	coding	12
Smyd2	SET and MYND domain containing 2 // SET and MYND domain containing 2 // SET and MYND domain containing 2 // SET and MYND domain containing 2 // SET and MYND domain containing 2 // SET and MYND domain containing 2		1	1	coding	3
Snap47	synaptosomal-associated protein, 47 // synaptosomal-associated protein, 47 // synaptosomal-associated protein, 47 // synaptosomal-associated protein, 47 // synaptosomal-associated protein, 47 // synaptosomal-associated protein, 47 // synaptosomal-associated protein, 47 // synaptosomal-associated protein, 47 // synaptosomal-associated protein, 47 // synaptosomal-associated protein, 47		1	1	coding	12
Snca	synuclein, alpha // synuclein, alpha // synuclein, alpha // synuclein, alpha // synuclein, alpha		2	2	coding	12
Sncb	synuclein, beta // synuclein, beta // synuclein, beta // synuclein, beta // synuclein, beta // synuclein, beta // synuclein, beta		2	2	coding	30
Sncg	synuclein, gamma // synuclein, gamma // synuclein, gamma // synuclein, gamma // synuclein, gamma // synuclein, gamma		1	1	coding	12
Snhg11	small nucleolar RNA host gene 11 // small nucleolar RNA host gene 11 // small nucleolar RNA host gene 11 // small nucleolar RNA host gene 11 // small nucleolar RNA host gene 11 // small nucleolar RNA host gene 11 // small nucleolar RNA host gene 11 // small nucleolar RNA host gene 11 // small nucleolar RNA host gene 11 // small nucleolar RNA host gene 11 // small nucleolar RNA host gene 11 // sma…		4	4	coding	12
Snph	syntaphilin // syntaphilin // syntaphilin // syntaphilin // syntaphilin // syntaphilin // syntaphilin // syntaphilin		3	3	coding	3
Snx32	sorting nexin 32 // sorting nexin 32 // sorting nexin 32 // sorting nexin 32 // sorting nexin 32 // sorting nexin 32		6	3	coding	6
Sorcs3	sortilin-related VPS10 domain containing receptor 3 // sortilin-related VPS10 domain containing receptor 3 // sortilin-related VPS10 domain containing receptor 3		2	2	coding	12
Sphkap	SPHK1 interactor, AKAP domain containing // SPHK1 interactor, AKAP domain containing // SPHK1 interactor, AKAP domain containing // SPHK1 interactor, AKAP domain containing // SPHK1 interactor, AKAP domain containing		4	3	coding	12
Spink10	serine peptidase inhibitor, Kazal type 10 // serine peptidase inhibitor, Kazal type 10 // serine peptidase inhibitor, Kazal type 10		3	2	coding	12
Spire2	spire homolog 2 (Drosophila) // spire homolog 2 (Drosophila) // spire homolog 2 (Drosophila) // spire homolog 2 (Drosophila) // spire homolog 2 (Drosophila) // spire homolog 2 (Drosophila)		4	3	coding	12
Spnb1	spectrin beta 1 // spectrin beta 1 // spectrin beta 1 // spectrin beta 1 // spectrin beta 1 // spectrin beta 1 // spectrin beta 1		2	2	coding	12
Spock2	sparc/osteonectin, cwcv and kazal-like domains proteoglycan 2 // sparc/osteonectin, cwcv and kazal-like domains proteoglycan 2 // sparc/osteonectin, cwcv and kazal-like domains proteoglycan 2 // sparc/osteonectin, cwcv and kazal-like domains proteoglycan 2 // sparc/osteonectin, cwcv and kazal-like domains proteoglycan 2 // sparc/osteonectin, cwcv and kazal-like domains proteoglycan 2 // sparc/ost…		3	3	coding	12
Spock3	sparc/osteonectin, cwcv and kazal-like domains proteoglycan 3 // sparc/osteonectin, cwcv and kazal-like domains proteoglycan 3 // sparc/osteonectin, cwcv and kazal-like domains proteoglycan 3 // sparc/osteonectin, cwcv and kazal-like domains proteoglycan 3 // sparc/osteonectin, cwcv and kazal-like domains proteoglycan 3 // sparc/osteonectin, cwcv and kazal-like domains proteoglycan 3 // sparc/ost…		1	1	coding	30
Spp1	secreted phosphoprotein 1 // secreted phosphoprotein 1 // secreted phosphoprotein 1 // secreted phosphoprotein 1 // secreted phosphoprotein 1 // secreted phosphoprotein 1 // secreted phosphoprotein 1 // secreted phosphoprotein 1 // secreted phosphoprotein 1 // secreted phosphoprotein 1		2	2	coding	75
Sprn	shadow of prion protein // shadow of prion protein // shadow of prion protein // shadow of prion protein // shadow of prion protein // shadow of prion protein		3	3	coding	6
Srgap3	SLIT-ROBO Rho GTPase activating protein 3 // SLIT-ROBO Rho GTPase activating protein 3 // SLIT-ROBO Rho GTPase activating protein 3 // SLIT-ROBO Rho GTPase activating protein 3 // SLIT-ROBO Rho GTPase activating protein 3 // SLIT-ROBO Rho GTPase activating protein 3 // SLIT-ROBO Rho GTPase activating protein 3		5	4	coding	6
Srgap3	SLIT-ROBO Rho GTPase activating protein 3 // SLIT-ROBO Rho GTPase activating protein 3 // SLIT-ROBO Rho GTPase activating protein 3 // SLIT-ROBO Rho GTPase activating protein 3		5	4	coding	12
Srsf12	serine/arginine-rich splicing factor 12 // serine/arginine-rich splicing factor 12 // serine/arginine-rich splicing factor 12 // serine/arginine-rich splicing factor 12 // serine/arginine-rich splicing factor 12 // serine/arginine-rich splicing factor 12		2	2	coding	6
Ss18l1	synovial sarcoma translocation gene on chromosome 18-like 1 // synovial sarcoma translocation gene on chromosome 18-like 1 // synovial sarcoma translocation gene on chromosome 18-like 1 // synovial sarcoma translocation gene on chromosome 18-like 1 // synovial sarcoma translocation gene on chromosome 18-like 1 // synovial sarcoma translocation gene on chromosome 18-like 1		1	1	coding	3
Ssbp2	single-stranded DNA binding protein 2 // single-stranded DNA binding protein 2 // single-stranded DNA binding protein 2 // single-stranded DNA binding protein 2 // single-stranded DNA binding protein 2		4	3	coding	6
St8sia1	ST8 alpha-N-acetyl-neuraminide alpha-2,8-sialyltransferase 1		2	1	coding	12
Stab1	stabilin 1 // stabilin 1 // stabilin 1 // stabilin 1 // stabilin 1 // stabilin 1 // stabilin 1 // stabilin 1 // stabilin 1 // stabilin 1 // stabilin 1		1	1	coding	78
Stac2	SH3 and cysteine rich domain 2 // SH3 and cysteine rich domain 2 // SH3 and cysteine rich domain 2 // SH3 and cysteine rich domain 2 // SH3 and cysteine rich domain 2 // SH3 and cysteine rich domain 2		3	3	coding	6
Stau2	staufen (RNA binding protein) homolog 2 (Drosophila) // staufen (RNA binding protein) homolog 2 (Drosophila) // staufen (RNA binding protein) homolog 2 (Drosophila) // staufen (RNA binding protein) homolog 2 (Drosophila) // staufen (RNA binding protein) homolog 2 (Drosophila) // staufen (RNA binding protein) homolog 2 (Drosophila) // staufen (RNA binding protein) homolog 2 (Drosophila) // staufen…		1	1	coding	12
Stmn3	stathmin-like 3 // stathmin-like 3 // stathmin-like 3 // stathmin-like 3		1	1	coding	30
Stmn4	stathmin-like 4 // stathmin-like 4 // stathmin-like 4 // stathmin-like 4		2	2	coding	12
Stoml1	stomatin-like 1 // stomatin-like 1 // stomatin-like 1 // stomatin-like 1 // stomatin-like 1 // stomatin-like 1 // stomatin-like 1 // stomatin-like 1		3	3	coding	6
Strbp	spermatid perinuclear RNA binding protein // spermatid perinuclear RNA binding protein // spermatid perinuclear RNA binding protein // spermatid perinuclear RNA binding protein // spermatid perinuclear RNA binding protein // spermatid perinuclear RNA binding protein		3	3	coding	6
Strbp	spermatid perinuclear RNA binding protein // spermatid perinuclear RNA binding protein // spermatid perinuclear RNA binding protein // spermatid perinuclear RNA binding protein // spermatid perinuclear RNA binding protein		3	3	coding	12
Stx1b	syntaxin 1B // syntaxin 1B // syntaxin 1B // syntaxin 1B // syntaxin 1B // syntaxin 1B // syntaxin 1B		1	1	coding	30
Stxbp1	syntaxin binding protein 1 // syntaxin binding protein 1 // syntaxin binding protein 1 // syntaxin binding protein 1 // syntaxin binding protein 1 // syntaxin binding protein 1 // syntaxin binding protein 1 // syntaxin binding protein 1 // syntaxin binding protein 1 // syntaxin binding protein 1 // syntaxin binding protein 1 // syntaxin binding protein 1		2	2	coding	30
Stxbp5l	syntaxin binding protein 5-like // syntaxin binding protein 5-like // syntaxin binding protein 5-like // syntaxin binding protein 5-like // syntaxin binding protein 5-like // syntaxin binding protein 5-like // syntaxin binding protein 5-like // syntaxin binding protein 5-like // syntaxin binding protein 5-like // syntaxin binding protein 5-like // syntaxin binding protein 5-like // syntaxin bindi…		1	1	coding	12
Surf4	surfeit gene 4 // surfeit gene 4 // surfeit gene 4 // surfeit gene 4 // surfeit gene 4 // surfeit gene 4 // surfeit gene 4		1	1	coding	78
Susd2	sushi domain containing 2 // sushi domain containing 2 // sushi domain containing 2 // sushi domain containing 2 // sushi domain containing 2 // sushi domain containing 2 // sushi domain containing 2 // sushi domain containing 2 // sushi domain containing 2 // sushi domain containing 2		3	2	coding	6
Susd4	sushi domain containing 4 // sushi domain containing 4 // sushi domain containing 4 // sushi domain containing 4 // sushi domain containing 4		2	2	coding	6
Sv2a	synaptic vesicle glycoprotein 2 a // synaptic vesicle glycoprotein 2 a // synaptic vesicle glycoprotein 2 a // synaptic vesicle glycoprotein 2 a // synaptic vesicle glycoprotein 2 a		2	2	coding	30
Sv2b	synaptic vesicle glycoprotein 2 b // synaptic vesicle glycoprotein 2 b // synaptic vesicle glycoprotein 2 b // synaptic vesicle glycoprotein 2 b // synaptic vesicle glycoprotein 2 b // synaptic vesicle glycoprotein 2 b // synaptic vesicle glycoprotein 2 b // synaptic vesicle glycoprotein 2 b // synaptic vesicle glycoprotein 2 b // synaptic vesicle glycoprotein 2 b		2	2	coding	12
Syn2	synapsin II // synapsin II // synapsin II // synapsin II // synapsin II // synapsin II		1	1	coding	12
Syn3	synapsin III // synapsin III		2	2	coding	12
Syne1	synaptic nuclear envelope 1 // synaptic nuclear envelope 1 // synaptic nuclear envelope 1 // synaptic nuclear envelope 1 // synaptic nuclear envelope 1 // synaptic nuclear envelope 1 // synaptic nuclear envelope 1		5	4	coding	6
Syngr3	synaptogyrin 3 // synaptogyrin 3 // synaptogyrin 3 // synaptogyrin 3 // synaptogyrin 3 // synaptogyrin 3		3	3	coding	12
Syt3	synaptotagmin III // synaptotagmin III // synaptotagmin III // synaptotagmin III // synaptotagmin III // synaptotagmin III // synaptotagmin III // synaptotagmin III // synaptotagmin III // synaptotagmin III // synaptotagmin III // synaptotagmin III		3	3	coding	3
Syt5	synaptotagmin V // synaptotagmin V // synaptotagmin V // synaptotagmin V // synaptotagmin V // synaptotagmin V		1	1	coding	30
Syt7	synaptotagmin VII // synaptotagmin VII // synaptotagmin VII // synaptotagmin VII // synaptotagmin VII // synaptotagmin VII // synaptotagmin VII // synaptotagmin VII		3	3	coding	3
Syt9	synaptotagmin IX // synaptotagmin IX // synaptotagmin IX // synaptotagmin IX // synaptotagmin IX		2	2	coding	12
Tac2	tachykinin 2 // tachykinin 2 // tachykinin 2 // tachykinin 2 // tachykinin 2 // tachykinin 2 // tachykinin 2 // tachykinin 2		5	3	coding	6
Tacr3	tachykinin receptor 3 // tachykinin receptor 3 // tachykinin receptor 3 // tachykinin receptor 3 // tachykinin receptor 3 // tachykinin receptor 3		2	2	coding	6
Tagln	transgelin // transgelin // transgelin // transgelin // transgelin // transgelin		1	1	coding	67
Tceal1	transcription elongation factor A (SII)-like 1 // transcription elongation factor A (SII)-like 1 // transcription elongation factor A (SII)-like 1 // transcription elongation factor A (SII)-like 1 // transcription elongation factor A (SII)-like 1 // transcription elongation factor A (SII)-like 1		4	3	coding	6
Tceal5	transcription elongation factor A (SII)-like 5 // transcription elongation factor A (SII)-like 5 // transcription elongation factor A (SII)-like 5 // transcription elongation factor A (SII)-like 5 // transcription elongation factor A (SII)-like 5 // transcription elongation factor A (SII)-like 5 // transcription elongation factor A (SII)-like 5		2	2	coding	3
Tcp11l1	t-complex 11 like 1 // t-complex 11 like 1 // t-complex 11 like 1 // t-complex 11 like 1 // t-complex 11 like 1		2	2	coding	6
Tecr	trans-2,3-enoyl-CoA reductase // trans-2,3-enoyl-CoA reductase // trans-2,3-enoyl-CoA reductase // trans-2,3-enoyl-CoA reductase // trans-2,3-enoyl-CoA reductase // trans-2,3-enoyl-CoA reductase // trans-2,3-enoyl-CoA reductase // trans-2,3-enoyl-CoA reductase		5	5	coding	6
Tesc	tescalcin // tescalcin // tescalcin // tescalcin // tescalcin // tescalcin // tescalcin // tescalcin // tescalcin // tescalcin // tescalcin // tescalcin // tescalcin // tescalcin // tescalcin		5	4	coding	12
Tfpi2	tissue factor pathway inhibitor 2 // tissue factor pathway inhibitor 2 // tissue factor pathway inhibitor 2		3	3	coding	75
Tgfbi	transforming growth factor, beta induced // transforming growth factor, beta induced // transforming growth factor, beta induced // transforming growth factor, beta induced // transforming growth factor, beta induced // transforming growth factor, beta induced // transforming growth factor, beta induced // transforming growth factor, beta induced		1	1	coding	67
Tgm2	transglutaminase 2, C polypeptide // transglutaminase 2, C polypeptide // transglutaminase 2, C polypeptide // transglutaminase 2, C polypeptide // transglutaminase 2, C polypeptide // transglutaminase 2, C polypeptide // transglutaminase 2, C polypeptide // transglutaminase 2, C polypeptide		3	2	coding	67
Thbs1	thrombospondin 1 // thrombospondin 1 // thrombospondin 1 // thrombospondin 1 // thrombospondin 1 // thrombospondin 1		2	2	coding	67
Thrsp	thyroid hormone responsive SPOT14 homolog (Rattus) // thyroid hormone responsive SPOT14 homolog (Rattus) // thyroid hormone responsive SPOT14 homolog (Rattus) // thyroid hormone responsive SPOT14 homolog (Rattus) // thyroid hormone responsive SPOT14 homolog (Rattus) // thyroid hormone responsive SPOT14 homolog (Rattus)		5	3	coding	6
Tlcd1	TLC domain containing 1 // TLC domain containing 1 // TLC domain containing 1 // TLC domain containing 1 // TLC domain containing 1 // TLC domain containing 1 // TLC domain containing 1 // TLC domain containing 1 // TLC domain containing 1 // TLC domain containing 1 // TLC domain containing 1 // TLC domain containing 1 // TLC domain containing 1 // TLC domain containing 1 // TLC domain containing…		2	2	coding	6
Tlr13	toll-like receptor 13 // toll-like receptor 13 // toll-like receptor 13 // toll-like receptor 13 // toll-like receptor 13 // toll-like receptor 13		3	3	coding	78
Tlr2	toll-like receptor 2 // toll-like receptor 2 // toll-like receptor 2 // toll-like receptor 2 // toll-like receptor 2 // toll-like receptor 2		2	2	coding	78
Tm7sf2	transmembrane 7 superfamily member 2 // transmembrane 7 superfamily member 2 // transmembrane 7 superfamily member 2 // transmembrane 7 superfamily member 2 // transmembrane 7 superfamily member 2 // transmembrane 7 superfamily member 2 // transmembrane 7 superfamily member 2 // transmembrane 7 superfamily member 2 // transmembrane 7 superfamily member 2 // transmembrane 7 superfamily member 2 //…		2	2	coding	3
Tmcc2	transmembrane and coiled-coil domains 2 // transmembrane and coiled-coil domains 2 // transmembrane and coiled-coil domains 2 // transmembrane and coiled-coil domains 2		6	4	coding	12
Tmed3	transmembrane emp24 domain containing 3 // transmembrane emp24 domain containing 3 // transmembrane emp24 domain containing 3 // transmembrane emp24 domain containing 3 // transmembrane emp24 domain containing 3		2	2	coding	51
Tmeff2	transmembrane protein with EGF-like and two follistatin-like domains 2 // transmembrane protein with EGF-like and two follistatin-like domains 2 // transmembrane protein with EGF-like and two follistatin-like domains 2		6	3	coding	3
Tmem106a	transmembrane protein 106A // transmembrane protein 106A // transmembrane protein 106A // transmembrane protein 106A // transmembrane protein 106A // transmembrane protein 106A // transmembrane protein 106A // transmembrane protein 106A // transmembrane protein 106A // transmembrane protein 106A // transmembrane protein 106A // transmembrane protein 106A		1	1	coding	78
Tmem145	transmembrane protein 145 // transmembrane protein 145 // transmembrane protein 145 // transmembrane protein 145 // transmembrane protein 145 // transmembrane protein 145 // transmembrane protein 145 // transmembrane protein 145 // transmembrane protein 145 // transmembrane protein 145		3	2	coding	12
Tmem150c	transmembrane protein 150C // transmembrane protein 150C // transmembrane protein 150C // transmembrane protein 150C // transmembrane protein 150C // transmembrane protein 150C // transmembrane protein 150C		3	3	coding	12
Tmem151a	transmembrane protein 151A // transmembrane protein 151A // transmembrane protein 151A // transmembrane protein 151A // transmembrane protein 151A		1	1	coding	3
Tmem151b	transmembrane protein 151B // transmembrane protein 151B // transmembrane protein 151B // t-complex-associated testis expressed 1 // t-complex-associated testis expressed 1 // transmembrane protein 151B // transmembrane protein 151B // transmembrane protein 151B // t-complex-associated testis expressed 1		3	2	coding	12
Tmem163	transmembrane protein 163 // transmembrane protein 163 // transmembrane protein 163 // transmembrane protein 163		2	1	coding	6
Tmem179	transmembrane protein 179 // transmembrane protein 179 // transmembrane protein 179 // transmembrane protein 179 // transmembrane protein 179 // transmembrane protein 179		1	1	coding	12
Tmem229a	transmembrane protein 229A // transmembrane protein 229A // transmembrane protein 229A // transmembrane protein 229A // transmembrane protein 229A // transmembrane protein 229A		2	1	coding	12
Tmem246	transmembrane protein 246 // transmembrane protein 246 // transmembrane protein 246 // transmembrane protein 246 // transmembrane protein 246 // transmembrane protein 246		2	2	coding	12
Tmem25	transmembrane protein 25 // transmembrane protein 25 // transmembrane protein 25 // transmembrane protein 25 // transmembrane protein 25 // transmembrane protein 25 // transmembrane protein 25 // transmembrane protein 25 // transmembrane protein 25 // transmembrane protein 25 // transmembrane protein 25 // transmembrane protein 25 // transmembrane protein 25 // transmembrane protein 25		2	2	coding	12
Tmem35	transmembrane protein 35 // transmembrane protein 35 // transmembrane protein 35 // transmembrane protein 35 // transmembrane protein 35 // transmembrane protein 35		5	3	coding	6
Tmem59l	transmembrane protein 59-like // transmembrane protein 59-like // transmembrane protein 59-like // transmembrane protein 59-like // transmembrane protein 59-like // transmembrane protein 59-like		1	1	coding	30
Tmem63c	transmembrane protein 63c // transmembrane protein 63c // transmembrane protein 63c // transmembrane protein 63c // transmembrane protein 63c // transmembrane protein 63c		2	2	coding	12
Tmpo	thymopoietin // thymopoietin // thymopoietin // thymopoietin // thymopoietin // thymopoietin // thymopoietin // thymopoietin // thymopoietin // thymopoietin // thymopoietin // thymopoietin // thymopoietin		3	3	coding	78
Tmx2	thioredoxin-related transmembrane protein 2 // thioredoxin-related transmembrane protein 2 // thioredoxin-related transmembrane protein 2 // thioredoxin-related transmembrane protein 2 // thioredoxin-related transmembrane protein 2 // thioredoxin-related transmembrane protein 2 // thioredoxin-related transmembrane protein 2 // thioredoxin-related transmembrane protein 2 // thioredoxin-related tra…		3	3	coding	12
Tnfrsf1b	tumor necrosis factor receptor superfamily, member 1b // tumor necrosis factor receptor superfamily, member 1b // tumor necrosis factor receptor superfamily, member 1b // tumor necrosis factor receptor superfamily, member 1b // tumor necrosis factor receptor superfamily, member 1b // tumor necrosis factor receptor superfamily, member 1b		1	1	coding	78
Tnk2	tyrosine kinase, non-receptor, 2 // tyrosine kinase, non-receptor, 2 // tyrosine kinase, non-receptor, 2 // tyrosine kinase, non-receptor, 2 // tyrosine kinase, non-receptor, 2 // tyrosine kinase, non-receptor, 2 // tyrosine kinase, non-receptor, 2 // tyrosine kinase, non-receptor, 2 // tyrosine kinase, non-receptor, 2 // tyrosine kinase, non-receptor, 2 // tyrosine kinase, non-receptor, 2 // tyr…		8	6	coding	12
Tom1l2	target of myb1-like 2 (chicken) // target of myb1-like 2 (chicken) // target of myb1-like 2 (chicken) // target of myb1-like 2 (chicken) // target of myb1-like 2 (chicken) // target of myb1-like 2 (chicken) // target of myb1-like 2 (chicken) // target of myb1-like 2 (chicken) // target of myb1-like 2 (chicken) // target of myb1-like 2 (chicken) // target of myb1-like 2 (chicken) // target of myb1…		4	3	coding	6
Tpd52l1	tumor protein D52-like 1 // tumor protein D52-like 1 // tumor protein D52-like 1 // tumor protein D52-like 1 // tumor protein D52-like 1 // tumor protein D52-like 1 // tumor protein D52-like 1 // tumor protein D52-like 1		3	2	coding	12
Tppp	tubulin polymerization promoting protein // tubulin polymerization promoting protein // tubulin polymerization promoting protein // tubulin polymerization promoting protein // tubulin polymerization promoting protein // tubulin polymerization promoting protein // tubulin polymerization promoting protein // tubulin polymerization promoting protein // tubulin polymerization promoting protein		2	2	coding	3
Trank1	tetratricopeptide repeat and ankyrin repeat containing 1 // tetratricopeptide repeat and ankyrin repeat containing 1		3	3	coding	6
Trhr	thyrotropin releasing hormone receptor // thyrotropin releasing hormone receptor // thyrotropin releasing hormone receptor // thyrotropin releasing hormone receptor		2	2	coding	6
Trim2	tripartite motif-containing 2 // tripartite motif-containing 2 // tripartite motif-containing 2 // tripartite motif-containing 2 // tripartite motif-containing 2 // tripartite motif-containing 2 // tripartite motif-containing 2 // tripartite motif-containing 2 // tripartite motif-containing 2 // tripartite motif-containing 2 // tripartite motif-containing 2 // tripartite motif-containing 2		1	1	coding	12
Trim30a	tripartite motif-containing 30A // tripartite motif-containing 30A // tripartite motif-containing 30A // tripartite motif-containing 30A // tripartite motif-containing 30A // tripartite motif-containing 30A // tripartite motif-containing 30A // tripartite motif-containing 30A // tripartite motif-containing 30A		4	3	coding	67
Trim32	tripartite motif-containing 32 // tripartite motif-containing 32 // tripartite motif-containing 32 // tripartite motif-containing 32 // tripartite motif-containing 32 // tripartite motif-containing 32		1	1	coding	6
Trim36	tripartite motif-containing 36 // tripartite motif-containing 36 // tripartite motif-containing 36 // tripartite motif-containing 36 // tripartite motif-containing 36		2	2	coding	12
Trim37	tripartite motif-containing 37 // tripartite motif-containing 37 // tripartite motif-containing 37 // tripartite motif-containing 37 // tripartite motif-containing 37 // tripartite motif-containing 37 // tripartite motif-containing 37		2	2	coding	3
Trim66	tripartite motif-containing 66 // tripartite motif-containing 66 // tripartite motif-containing 66 // tripartite motif-containing 66 // tripartite motif-containing 66		2	2	coding	12
Trim9	tripartite motif-containing 9 // tripartite motif-containing 9 // tripartite motif-containing 9 // tripartite motif-containing 9 // tripartite motif-containing 9 // tripartite motif-containing 9 // tripartite motif-containing 9		1	1	coding	30
Trnp1	TMF1-regulated nuclear protein 1 // TMF1-regulated nuclear protein 1 // TMF1-regulated nuclear protein 1 // TMF1-regulated nuclear protein 1 // TMF1-regulated nuclear protein 1 // TMF1-regulated nuclear protein 1		1	1	coding	3
[truncated: 61 more rows]
