# Supplementary material for: Aberrant LncRNA Expression Profile in a Contusion Spinal Cord Injury Mouse Model
Source: Biomed Res Int. 2016 Sep 4;2016:9249401. doi: 10.1155/2016/9249401 (PMC5027055; doi:10.1155/2016/9249401)
Supplement: Supplementary file 1 — S1 license pdf: The License Awarded by Soochow University. Table S1: Differential Expression of LncRNAs and Annotation. Table S2: Differential Expression of mRNAs and Annotation. Table S3: mRNAs STC Increase or Decrease. Table S4: LncRNAs STC Increase or Decrease. Table S5: The Significant GO Terms for Differentially Expressed. Table S6: The Significant Pathways of Differentially Expressed Genes. Table S7: The Quantity of the mRNA and LncRNA Network. S1 Fig: The dynamic network between LncRNAs and mRNAs. In this map, the circles with a green line represented LncRNAs, and the other circles represented mRNA. The lines between circles indicated regulation between these genes. The size of the circles indicated the ability of interaction between the genes. This ability was quantified by the degree, which was defined as the connective number between genes. The color was in accordance with the results of the clustering analysis, which was defined as the K-core. The same K-core indicated the similarity and correlation of function between genes. The red color representing the maximal K-core indicated the strongest regulation level in this network. [file 9249401.f1.zip › S8 Table.xls]

## Sheet: Sheet1
STC ID	0 day	1 day	3 days	1 week	3 weeks	Genes Assigned	Genes Expected	p-value	Corrected p-value	STC ID (#1)	0 day	1 day	3 days	1 week	3 weeks	Genes Assigned (#1)	Genes Expected (#1)	p-value (#1)	Corrected p-value (#1)	Gene Symbols_SplitResultList
Profile12	0	-1	-1	-2	-1	1284	125.367	0	0	Profile12	0	-1	-1	-2	-1	1049	183	0	0	Diras1	TRUE
Profile12	0	-1	-1	-2	-1	1284	125.367	0	0	Profile12	0	-1	-1	-2	-1	1049	183	0	0	Gabrb2	TRUE
Profile12	0	-1	-1	-2	-1	1284	125.367	0	0	Profile12	0	-1	-1	-2	-1	1049	183	0	0	Car4	TRUE
Profile12	0	-1	-1	-2	-1	1284	125.367	0	0	Profile12	0	-1	-1	-2	-1	1049	183	0	0	Fgf11	TRUE
Profile12	0	-1	-1	-2	-1	1284	125.367	0	0	Profile12	0	-1	-1	-2	-1	1049	183	0	0	Rapgef5	TRUE
Profile12	0	-1	-1	-2	-1	1284	125.367	0	0	Profile12	0	-1	-1	-2	-1	1049	183	0	0	Elovl2	TRUE
Profile12	0	-1	-1	-2	-1	1284	125.367	0	0	Profile12	0	-1	-1	-2	-1	1049	183	0	0	Accn2	TRUE
Profile12	0	-1	-1	-2	-1	1284	125.367	0	0	Profile12	0	-1	-1	-2	-1	1049	183	0	0	Dgkg	TRUE
Profile12	0	-1	-1	-2	-1	1284	125.367	0	0	Profile12	0	-1	-1	-2	-1	1049	183	0	0	Cbln2	TRUE
Profile12	0	-1	-1	-2	-1	1284	125.367	0	0	Profile12	0	-1	-1	-2	-1	1049	183	0	0	Cnnm1	TRUE
Profile12	0	-1	-1	-2	-1	1284	125.367	0	0	Profile12	0	-1	-1	-2	-1	1049	183	0	0	Necab3	TRUE
Profile12	0	-1	-1	-2	-1	1284	125.367	0	0	Profile12	0	-1	-1	-2	-1	1049	183	0	0	Mab21l2	TRUE
Profile12	0	-1	-1	-2	-1	1284	125.367	0	0	Profile12	0	-1	-1	-2	-1	1049	183	0	0	4933431E20Rik	TRUE
Profile12	0	-1	-1	-2	-1	1284	125.367	0	0	Profile12	0	-1	-1	-2	-1	1049	183	0	0	Elavl4	TRUE
Profile12	0	-1	-1	-2	-1	1284	125.367	0	0	Profile12	0	-1	-1	-2	-1	1049	183	0	0	Ccdc149	TRUE
Profile12	0	-1	-1	-2	-1	1284	125.367	0	0	Profile12	0	-1	-1	-2	-1	1049	183	0	0	Cit	TRUE
Profile12	0	-1	-1	-2	-1	1284	125.367	0	0	Profile12	0	-1	-1	-2	-1	1049	183	0	0	Cntn4	TRUE
Profile12	0	-1	-1	-2	-1	1284	125.367	0	0	Profile12	0	-1	-1	-2	-1	1049	183	0	0	Far2	TRUE
Profile12	0	-1	-1	-2	-1	1284	125.367	0	0	Profile12	0	-1	-1	-2	-1	1049	183	0	0	St8sia1	TRUE
Profile12	0	-1	-1	-2	-1	1284	125.367	0	0	Profile12	0	-1	-1	-2	-1	1049	183	0	0	Hbb-b1	TRUE
Profile12	0	-1	-1	-2	-1	1284	125.367	0	0	Profile12	0	-1	-1	-2	-1	1049	183	0	0	Cdk10	TRUE
Profile12	0	-1	-1	-2	-1	1284	125.367	0	0	Profile12	0	-1	-1	-2	-1	1049	183	0	0	Slc35f3	TRUE
Profile12	0	-1	-1	-2	-1	1284	125.367	0	0	Profile12	0	-1	-1	-2	-1	1049	183	0	0	Mast1	TRUE
Profile12	0	-1	-1	-2	-1	1284	125.367	0	0	Profile12	0	-1	-1	-2	-1	1049	183	0	0	Cdh8	TRUE
Profile12	0	-1	-1	-2	-1	1284	125.367	0	0	Profile12	0	-1	-1	-2	-1	1049	183	0	0	Fa2h	TRUE
Profile12	0	-1	-1	-2	-1	1284	125.367	0	0	Profile12	0	-1	-1	-2	-1	1049	183	0	0	Drd2	TRUE
Profile12	0	-1	-1	-2	-1	1284	125.367	0	0	Profile12	0	-1	-1	-2	-1	1049	183	0	0	Entpd3	TRUE
Profile12	0	-1	-1	-2	-1	1284	125.367	0	0	Profile12	0	-1	-1	-2	-1	1049	183	0	0	Dgkk	TRUE
Profile12	0	-1	-1	-2	-1	1284	125.367	0	0	Profile12	0	-1	-1	-2	-1	1049	183	0	0	Arxes1	TRUE
Profile12	0	-1	-1	-2	-1	1284	125.367	0	0	Profile12	0	-1	-1	-2	-1	1049	183	0	0	Mcf2	TRUE
Profile12	0	-1	-1	-2	-1	1284	125.367	0	0	Profile12	0	-1	-1	-2	-1	1049	183	0	0	Oprk1	TRUE
Profile12	0	-1	-1	-2	-1	1284	125.367	0	0	Profile12	0	-1	-1	-2	-1	1049	183	0	0	A830018L16Rik	TRUE
Profile12	0	-1	-1	-2	-1	1284	125.367	0	0	Profile12	0	-1	-1	-2	-1	1049	183	0	0	Gdap1	TRUE
Profile12	0	-1	-1	-2	-1	1284	125.367	0	0	Profile12	0	-1	-1	-2	-1	1049	183	0	0	Fam123c	TRUE
Profile12	0	-1	-1	-2	-1	1284	125.367	0	0	Profile12	0	-1	-1	-2	-1	1049	183	0	0	Adam23	TRUE
Profile12	0	-1	-1	-2	-1	1284	125.367	0	0	Profile12	0	-1	-1	-2	-1	1049	183	0	0	Mtap2	TRUE
Profile12	0	-1	-1	-2	-1	1284	125.367	0	0	Profile12	0	-1	-1	-2	-1	1049	183	0	0	Unc80	TRUE
Profile12	0	-1	-1	-2	-1	1284	125.367	0	0	Profile12	0	-1	-1	-2	-1	1049	183	0	0	Slc4a3	TRUE
Profile12	0	-1	-1	-2	-1	1284	125.367	0	0	Profile12	0	-1	-1	-2	-1	1049	183	0	0	9430031J16Rik	TRUE
Profile12	0	-1	-1	-2	-1	1284	125.367	0	0	Profile12	0	-1	-1	-2	-1	1049	183	0	0	Efhd1	TRUE
Profile12	0	-1	-1	-2	-1	1284	125.367	0	0	Profile12	0	-1	-1	-2	-1	1049	183	0	0	Klhdc8a	TRUE
Profile12	0	-1	-1	-2	-1	1284	125.367	0	0	Profile12	0	-1	-1	-2	-1	1049	183	0	0	Lrrn2	TRUE
Profile12	0	-1	-1	-2	-1	1284	125.367	0	0	Profile12	0	-1	-1	-2	-1	1049	183	0	0	Plekha6	TRUE
Profile12	0	-1	-1	-2	-1	1284	125.367	0	0	Profile12	0	-1	-1	-2	-1	1049	183	0	0	Fmn2	TRUE
Profile12	0	-1	-1	-2	-1	1284	125.367	0	0	Profile12	0	-1	-1	-2	-1	1049	183	0	0	Sccpdh	TRUE
Profile12	0	-1	-1	-2	-1	1284	125.367	0	0	Profile12	0	-1	-1	-2	-1	1049	183	0	0	Stau2	TRUE
Profile12	0	-1	-1	-2	-1	1284	125.367	0	0	Profile12	0	-1	-1	-2	-1	1049	183	0	0	Jph1	TRUE
Profile12	0	-1	-1	-2	-1	1284	125.367	0	0	Profile12	0	-1	-1	-2	-1	1049	183	0	0	Rims1	TRUE
Profile12	0	-1	-1	-2	-1	1284	125.367	0	0	Profile12	0	-1	-1	-2	-1	1049	183	0	0	2610017I09Rik	TRUE
Profile12	0	-1	-1	-2	-1	1284	125.367	0	0	Profile12	0	-1	-1	-2	-1	1049	183	0	0	Mfsd6	TRUE
Profile12	0	-1	-1	-2	-1	1284	125.367	0	0	Profile12	0	-1	-1	-2	-1	1049	183	0	0	1700019D03Rik	TRUE
Profile12	0	-1	-1	-2	-1	1284	125.367	0	0	Profile12	0	-1	-1	-2	-1	1049	183	0	0	Hecw2	TRUE
Profile12	0	-1	-1	-2	-1	1284	125.367	0	0	Profile12	0	-1	-1	-2	-1	1049	183	0	0	Tuba4a	TRUE
Profile12	0	-1	-1	-2	-1	1284	125.367	0	0	Profile12	0	-1	-1	-2	-1	1049	183	0	0	Resp18	TRUE
Profile12	0	-1	-1	-2	-1	1284	125.367	0	0	Profile12	0	-1	-1	-2	-1	1049	183	0	0	Sphkap	TRUE
Profile12	0	-1	-1	-2	-1	1284	125.367	0	0	Profile12	0	-1	-1	-2	-1	1049	183	0	0	Dner	TRUE
Profile12	0	-1	-1	-2	-1	1284	125.367	0	0	Profile12	0	-1	-1	-2	-1	1049	183	0	0	Dpp10	TRUE
Profile12	0	-1	-1	-2	-1	1284	125.367	0	0	Profile12	0	-1	-1	-2	-1	1049	183	0	0	Lypd1	TRUE
Profile12	0	-1	-1	-2	-1	1284	125.367	0	0	Profile12	0	-1	-1	-2	-1	1049	183	0	0	Tmcc2	TRUE
Profile12	0	-1	-1	-2	-1	1284	125.367	0	0	Profile12	0	-1	-1	-2	-1	1049	183	0	0	Adora1	TRUE
Profile12	0	-1	-1	-2	-1	1284	125.367	0	0	Profile12	0	-1	-1	-2	-1	1049	183	0	0	Shisa4	TRUE
Profile12	0	-1	-1	-2	-1	1284	125.367	0	0	Profile12	0	-1	-1	-2	-1	1049	183	0	0	Cacna1e	TRUE
Profile12	0	-1	-1	-2	-1	1284	125.367	0	0	Profile12	0	-1	-1	-2	-1	1049	183	0	0	Dnm3	TRUE
Profile12	0	-1	-1	-2	-1	1284	125.367	0	0	Profile12	0	-1	-1	-2	-1	1049	183	0	0	Atp1b1	TRUE
Profile12	0	-1	-1	-2	-1	1284	125.367	0	0	Profile12	0	-1	-1	-2	-1	1049	183	0	0	Kcnj9	TRUE
Profile12	0	-1	-1	-2	-1	1284	125.367	0	0	Profile12	0	-1	-1	-2	-1	1049	183	0	0	Cadm3	TRUE
Profile12	0	-1	-1	-2	-1	1284	125.367	0	0	Profile12	0	-1	-1	-2	-1	1049	183	0	0	Enah	TRUE
Profile12	0	-1	-1	-2	-1	1284	125.367	0	0	Profile12	0	-1	-1	-2	-1	1049	183	0	0	Mark1	TRUE
Profile12	0	-1	-1	-2	-1	1284	125.367	0	0	Profile12	0	-1	-1	-2	-1	1049	183	0	0	Camk1g	TRUE
Profile12	0	-1	-1	-2	-1	1284	125.367	0	0	Profile12	0	-1	-1	-2	-1	1049	183	0	0	Lrp11	TRUE
Profile12	0	-1	-1	-2	-1	1284	125.367	0	0	Profile12	0	-1	-1	-2	-1	1049	183	0	0	Ahi1	TRUE
Profile12	0	-1	-1	-2	-1	1284	125.367	0	0	Profile12	0	-1	-1	-2	-1	1049	183	0	0	Spock2	TRUE
Profile12	0	-1	-1	-2	-1	1284	125.367	0	0	Profile12	0	-1	-1	-2	-1	1049	183	0	0	Chchd10	TRUE
Profile12	0	-1	-1	-2	-1	1284	125.367	0	0	Profile12	0	-1	-1	-2	-1	1049	183	0	0	Slc1a6	TRUE
Profile12	0	-1	-1	-2	-1	1284	125.367	0	0	Profile12	0	-1	-1	-2	-1	1049	183	0	0	Apc2	TRUE
Profile12	0	-1	-1	-2	-1	1284	125.367	0	0	Profile12	0	-1	-1	-2	-1	1049	183	0	0	Reep6	TRUE
Profile12	0	-1	-1	-2	-1	1284	125.367	0	0	Profile12	0	-1	-1	-2	-1	1049	183	0	0	Btbd11	TRUE
Profile12	0	-1	-1	-2	-1	1284	125.367	0	0	Profile12	0	-1	-1	-2	-1	1049	183	0	0	Slc6a15	TRUE
Profile12	0	-1	-1	-2	-1	1284	125.367	0	0	Profile12	0	-1	-1	-2	-1	1049	183	0	0	Ppfia2	TRUE
Profile12	0	-1	-1	-2	-1	1284	125.367	0	0	Profile12	0	-1	-1	-2	-1	1049	183	0	0	Ncoa7	TRUE
Profile12	0	-1	-1	-2	-1	1284	125.367	0	0	Profile12	0	-1	-1	-2	-1	1049	183	0	0	Tpd52l1	TRUE
Profile12	0	-1	-1	-2	-1	1284	125.367	0	0	Profile12	0	-1	-1	-2	-1	1049	183	0	0	Clvs2	TRUE
Profile12	0	-1	-1	-2	-1	1284	125.367	0	0	Profile12	0	-1	-1	-2	-1	1049	183	0	0	Syn3	TRUE
Profile12	0	-1	-1	-2	-1	1284	125.367	0	0	Profile12	0	-1	-1	-2	-1	1049	183	0	0	Ano4	TRUE
Profile12	0	-1	-1	-2	-1	1284	125.367	0	0	Profile12	0	-1	-1	-2	-1	1049	183	0	0	Gal3st1	TRUE
Profile12	0	-1	-1	-2	-1	1284	125.367	0	0	Profile12	0	-1	-1	-2	-1	1049	183	0	0	Vstm2a	TRUE
Profile12	0	-1	-1	-2	-1	1284	125.367	0	0	Profile12	0	-1	-1	-2	-1	1049	183	0	0	Gpr75	TRUE
Profile12	0	-1	-1	-2	-1	1284	125.367	0	0	Profile12	0	-1	-1	-2	-1	1049	183	0	0	Nsg2	TRUE
Profile12	0	-1	-1	-2	-1	1284	125.367	0	0	Profile12	0	-1	-1	-2	-1	1049	183	0	0	Fstl4	TRUE
Profile12	0	-1	-1	-2	-1	1284	125.367	0	0	Profile12	0	-1	-1	-2	-1	1049	183	0	0	Kif3a	TRUE
Profile12	0	-1	-1	-2	-1	1284	125.367	0	0	Profile12	0	-1	-1	-2	-1	1049	183	0	0	Acsl6	TRUE
Profile12	0	-1	-1	-2	-1	1284	125.367	0	0	Profile12	0	-1	-1	-2	-1	1049	183	0	0	Gria1	TRUE
Profile12	0	-1	-1	-2	-1	1284	125.367	0	0	Profile12	0	-1	-1	-2	-1	1049	183	0	0	Hist3h2ba	TRUE
Profile12	0	-1	-1	-2	-1	1284	125.367	0	0	Profile12	0	-1	-1	-2	-1	1049	183	0	0	Vamp2	TRUE
Profile12	0	-1	-1	-2	-1	1284	125.367	0	0	Profile12	0	-1	-1	-2	-1	1049	183	0	0	A030009H04Rik	TRUE
Profile12	0	-1	-1	-2	-1	1284	125.367	0	0	Profile12	0	-1	-1	-2	-1	1049	183	0	0	Camkk1	TRUE
Profile12	0	-1	-1	-2	-1	1284	125.367	0	0	Profile12	0	-1	-1	-2	-1	1049	183	0	0	Coro6	TRUE
Profile12	0	-1	-1	-2	-1	1284	125.367	0	0	Profile12	0	-1	-1	-2	-1	1049	183	0	0	Sez6	TRUE
Profile12	0	-1	-1	-2	-1	1284	125.367	0	0	Profile12	0	-1	-1	-2	-1	1049	183	0	0	Cdk5r1	TRUE
Profile12	0	-1	-1	-2	-1	1284	125.367	0	0	Profile12	0	-1	-1	-2	-1	1049	183	0	0	Phospho1	TRUE
Profile12	0	-1	-1	-2	-1	1284	125.367	0	0	Profile12	0	-1	-1	-2	-1	1049	183	0	0	Hoxb8	TRUE
Profile12	0	-1	-1	-2	-1	1284	125.367	0	0	Profile12	0	-1	-1	-2	-1	1049	183	0	0	Tubg2	TRUE
Profile12	0	-1	-1	-2	-1	1284	125.367	0	0	Profile12	0	-1	-1	-2	-1	1049	183	0	0	Adam11	TRUE
Profile12	0	-1	-1	-2	-1	1284	125.367	0	0	Profile12	0	-1	-1	-2	-1	1049	183	0	0	Arsg	TRUE
Profile12	0	-1	-1	-2	-1	1284	125.367	0	0	Profile12	0	-1	-1	-2	-1	1049	183	0	0	Kcnj16	TRUE
Profile12	0	-1	-1	-2	-1	1284	125.367	0	0	Profile12	0	-1	-1	-2	-1	1049	183	0	0	Rab37	TRUE
Profile12	0	-1	-1	-2	-1	1284	125.367	0	0	Profile12	0	-1	-1	-2	-1	1049	183	0	0	Mgat5b	TRUE
Profile12	0	-1	-1	-2	-1	1284	125.367	0	0	Profile12	0	-1	-1	-2	-1	1049	183	0	0	Inpp5j	TRUE
Profile12	0	-1	-1	-2	-1	1284	125.367	0	0	Profile12	0	-1	-1	-2	-1	1049	183	0	0	Mtfp1	TRUE
Profile12	0	-1	-1	-2	-1	1284	125.367	0	0	Profile12	0	-1	-1	-2	-1	1049	183	0	0	Sec14l2	TRUE
Profile12	0	-1	-1	-2	-1	1284	125.367	0	0	Profile12	0	-1	-1	-2	-1	1049	183	0	0	Camk2b	TRUE
Profile12	0	-1	-1	-2	-1	1284	125.367	0	0	Profile12	0	-1	-1	-2	-1	1049	183	0	0	Kcnip1	TRUE
Profile12	0	-1	-1	-2	-1	1284	125.367	0	0	Profile12	0	-1	-1	-2	-1	1049	183	0	0	Gabrg2	TRUE
Profile12	0	-1	-1	-2	-1	1284	125.367	0	0	Profile12	0	-1	-1	-2	-1	1049	183	0	0	Gabra1	TRUE
Profile12	0	-1	-1	-2	-1	1284	125.367	0	0	Profile12	0	-1	-1	-2	-1	1049	183	0	0	Nipal4	TRUE
Profile12	0	-1	-1	-2	-1	1284	125.367	0	0	Profile12	0	-1	-1	-2	-1	1049	183	0	0	Glra1	TRUE
Profile12	0	-1	-1	-2	-1	1284	125.367	0	0	Profile12	0	-1	-1	-2	-1	1049	183	0	0	Gjc2	TRUE
Profile12	0	-1	-1	-2	-1	1284	125.367	0	0	Profile12	0	-1	-1	-2	-1	1049	183	0	0	Snap47	TRUE
Profile12	0	-1	-1	-2	-1	1284	125.367	0	0	Profile12	0	-1	-1	-2	-1	1049	183	0	0	Rnf112	TRUE
Profile12	0	-1	-1	-2	-1	1284	125.367	0	0	Profile12	0	-1	-1	-2	-1	1049	183	0	0	Arhgap44	TRUE
Profile12	0	-1	-1	-2	-1	1284	125.367	0	0	Profile12	0	-1	-1	-2	-1	1049	183	0	0	Efnb3	TRUE
Profile12	0	-1	-1	-2	-1	1284	125.367	0	0	Profile12	0	-1	-1	-2	-1	1049	183	0	0	Sarm1	TRUE
Profile12	0	-1	-1	-2	-1	1284	125.367	0	0	Profile12	0	-1	-1	-2	-1	1049	183	0	0	Krt222	TRUE
Profile12	0	-1	-1	-2	-1	1284	125.367	0	0	Profile12	0	-1	-1	-2	-1	1049	183	0	0	Hap1	TRUE
Profile12	0	-1	-1	-2	-1	1284	125.367	0	0	Profile12	0	-1	-1	-2	-1	1049	183	0	0	Acly	TRUE
Profile12	0	-1	-1	-2	-1	1284	125.367	0	0	Profile12	0	-1	-1	-2	-1	1049	183	0	0	Mpp2	TRUE
Profile12	0	-1	-1	-2	-1	1284	125.367	0	0	Profile12	0	-1	-1	-2	-1	1049	183	0	0	Rbfox3	TRUE
Profile12	0	-1	-1	-2	-1	1284	125.367	0	0	Profile12	0	-1	-1	-2	-1	1049	183	0	0	Aatk	TRUE
Profile12	0	-1	-1	-2	-1	1284	125.367	0	0	Profile12	0	-1	-1	-2	-1	1049	183	0	0	Myt1l	TRUE
Profile12	0	-1	-1	-2	-1	1284	125.367	0	0	Profile12	0	-1	-1	-2	-1	1049	183	0	0	Lrfn5	TRUE
Profile12	0	-1	-1	-2	-1	1284	125.367	0	0	Profile12	0	-1	-1	-2	-1	1049	183	0	0	Atl1	TRUE
Profile12	0	-1	-1	-2	-1	1284	125.367	0	0	Profile12	0	-1	-1	-2	-1	1049	183	0	0	Galntl1	TRUE
Profile12	0	-1	-1	-2	-1	1284	125.367	0	0	Profile12	0	-1	-1	-2	-1	1049	183	0	0	Tmem63c	TRUE
Profile12	0	-1	-1	-2	-1	1284	125.367	0	0	Profile12	0	-1	-1	-2	-1	1049	183	0	0	Otub2	TRUE
Profile12	0	-1	-1	-2	-1	1284	125.367	0	0	Profile12	0	-1	-1	-2	-1	1049	183	0	0	Ppp4r4	TRUE
Profile12	0	-1	-1	-2	-1	1284	125.367	0	0	Profile12	0	-1	-1	-2	-1	1049	183	0	0	Cyp46a1	TRUE
Profile12	0	-1	-1	-2	-1	1284	125.367	0	0	Profile12	0	-1	-1	-2	-1	1049	183	0	0	Meg3	TRUE
Profile12	0	-1	-1	-2	-1	1284	125.367	0	0	Profile12	0	-1	-1	-2	-1	1049	183	0	0	AW555464	TRUE
Profile12	0	-1	-1	-2	-1	1284	125.367	0	0	Profile12	0	-1	-1	-2	-1	1049	183	0	0	Ptprn2	TRUE
Profile12	0	-1	-1	-2	-1	1284	125.367	0	0	Profile12	0	-1	-1	-2	-1	1049	183	0	0	Mdga2	TRUE
Profile12	0	-1	-1	-2	-1	1284	125.367	0	0	Profile12	0	-1	-1	-2	-1	1049	183	0	0	Cdkl1	TRUE
Profile12	0	-1	-1	-2	-1	1284	125.367	0	0	Profile12	0	-1	-1	-2	-1	1049	183	0	0	Kcnh5	TRUE
Profile12	0	-1	-1	-2	-1	1284	125.367	0	0	Profile12	0	-1	-1	-2	-1	1049	183	0	0	Spnb1	TRUE
Profile12	0	-1	-1	-2	-1	1284	125.367	0	0	Profile12	0	-1	-1	-2	-1	1049	183	0	0	Tmem179	TRUE
Profile12	0	-1	-1	-2	-1	1284	125.367	0	0	Profile12	0	-1	-1	-2	-1	1049	183	0	0	Adarb2	TRUE
Profile12	0	-1	-1	-2	-1	1284	125.367	0	0	Profile12	0	-1	-1	-2	-1	1049	183	0	0	Amph	TRUE
Profile12	0	-1	-1	-2	-1	1284	125.367	0	0	Profile12	0	-1	-1	-2	-1	1049	183	0	0	Phactr1	TRUE
Profile12	0	-1	-1	-2	-1	1284	125.367	0	0	Profile12	0	-1	-1	-2	-1	1049	183	0	0	Cap2	TRUE
Profile12	0	-1	-1	-2	-1	1284	125.367	0	0	Profile12	0	-1	-1	-2	-1	1049	183	0	0	Unc5a	TRUE
Profile12	0	-1	-1	-2	-1	1284	125.367	0	0	Profile12	0	-1	-1	-2	-1	1049	183	0	0	Habp4	TRUE
Profile12	0	-1	-1	-2	-1	1284	125.367	0	0	Profile12	0	-1	-1	-2	-1	1049	183	0	0	Pcsk1	TRUE
Profile12	0	-1	-1	-2	-1	1284	125.367	0	0	Profile12	0	-1	-1	-2	-1	1049	183	0	0	Ankrd34b	TRUE
Profile12	0	-1	-1	-2	-1	1284	125.367	0	0	Profile12	0	-1	-1	-2	-1	1049	183	0	0	Elovl7	TRUE
Profile12	0	-1	-1	-2	-1	1284	125.367	0	0	Profile12	0	-1	-1	-2	-1	1049	183	0	0	Fgf10	TRUE
Profile12	0	-1	-1	-2	-1	1284	125.367	0	0	Profile12	0	-1	-1	-2	-1	1049	183	0	0	Pfkp	TRUE
Profile12	0	-1	-1	-2	-1	1284	125.367	0	0	Profile12	0	-1	-1	-2	-1	1049	183	0	0	Ryr2	TRUE
Profile12	0	-1	-1	-2	-1	1284	125.367	0	0	Profile12	0	-1	-1	-2	-1	1049	183	0	0	Hecw1	TRUE
Profile12	0	-1	-1	-2	-1	1284	125.367	0	0	Profile12	0	-1	-1	-2	-1	1049	183	0	0	Wnk2	TRUE
Profile12	0	-1	-1	-2	-1	1284	125.367	0	0	Profile12	0	-1	-1	-2	-1	1049	183	0	0	Diras2	TRUE
Profile12	0	-1	-1	-2	-1	1284	125.367	0	0	Profile12	0	-1	-1	-2	-1	1049	183	0	0	Auh	TRUE
Profile12	0	-1	-1	-2	-1	1284	125.367	0	0	Profile12	0	-1	-1	-2	-1	1049	183	0	0	Agtpbp1	TRUE
Profile12	0	-1	-1	-2	-1	1284	125.367	0	0	Profile12	0	-1	-1	-2	-1	1049	183	0	0	Srd5a1	TRUE
Profile12	0	-1	-1	-2	-1	1284	125.367	0	0	Profile12	0	-1	-1	-2	-1	1049	183	0	0	Pde8b	TRUE
Profile12	0	-1	-1	-2	-1	1284	125.367	0	0	Profile12	0	-1	-1	-2	-1	1049	183	0	0	Rgnef	TRUE
Profile12	0	-1	-1	-2	-1	1284	125.367	0	0	Profile12	0	-1	-1	-2	-1	1049	183	0	0	Rab3c	TRUE
Profile12	0	-1	-1	-2	-1	1284	125.367	0	0	Profile12	0	-1	-1	-2	-1	1049	183	0	0	Grid1	TRUE
Profile12	0	-1	-1	-2	-1	1284	125.367	0	0	Profile12	0	-1	-1	-2	-1	1049	183	0	0	Cpne6	TRUE
Profile12	0	-1	-1	-2	-1	1284	125.367	0	0	Profile12	0	-1	-1	-2	-1	1049	183	0	0	Fgf9	TRUE
Profile12	0	-1	-1	-2	-1	1284	125.367	0	0	Profile12	0	-1	-1	-2	-1	1049	183	0	0	Fam123a	TRUE
Profile12	0	-1	-1	-2	-1	1284	125.367	0	0	Profile12	0	-1	-1	-2	-1	1049	183	0	0	Fbxo16	TRUE
Profile12	0	-1	-1	-2	-1	1284	125.367	0	0	Profile12	0	-1	-1	-2	-1	1049	183	0	0	Stmn4	TRUE
Profile12	0	-1	-1	-2	-1	1284	125.367	0	0	Profile12	0	-1	-1	-2	-1	1049	183	0	0	Adra1a	TRUE
Profile12	0	-1	-1	-2	-1	1284	125.367	0	0	Profile12	0	-1	-1	-2	-1	1049	183	0	0	Pnma2	TRUE
Profile12	0	-1	-1	-2	-1	1284	125.367	0	0	Profile12	0	-1	-1	-2	-1	1049	183	0	0	Kctd9	TRUE
Profile12	0	-1	-1	-2	-1	1284	125.367	0	0	Profile12	0	-1	-1	-2	-1	1049	183	0	0	Phyhip	TRUE
Profile12	0	-1	-1	-2	-1	1284	125.367	0	0	Profile12	0	-1	-1	-2	-1	1049	183	0	0	Pcdh17	TRUE
Profile12	0	-1	-1	-2	-1	1284	125.367	0	0	Profile12	0	-1	-1	-2	-1	1049	183	0	0	Cadps	TRUE
Profile12	0	-1	-1	-2	-1	1284	125.367	0	0	Profile12	0	-1	-1	-2	-1	1049	183	0	0	Sncg	TRUE
Profile12	0	-1	-1	-2	-1	1284	125.367	0	0	Profile12	0	-1	-1	-2	-1	1049	183	0	0	Sdr39u1	TRUE
Profile12	0	-1	-1	-2	-1	1284	125.367	0	0	Profile12	0	-1	-1	-2	-1	1049	183	0	0	Epb4.9	TRUE
Profile12	0	-1	-1	-2	-1	1284	125.367	0	0	Profile12	0	-1	-1	-2	-1	1049	183	0	0	Baalc	TRUE
Profile12	0	-1	-1	-2	-1	1284	125.367	0	0	Profile12	0	-1	-1	-2	-1	1049	183	0	0	A930017M01Rik	TRUE
Profile12	0	-1	-1	-2	-1	1284	125.367	0	0	Profile12	0	-1	-1	-2	-1	1049	183	0	0	Mal2	TRUE
Profile12	0	-1	-1	-2	-1	1284	125.367	0	0	Profile12	0	-1	-1	-2	-1	1049	183	0	0	Bai1	TRUE
Profile12	0	-1	-1	-2	-1	1284	125.367	0	0	Profile12	0	-1	-1	-2	-1	1049	183	0	0	Kifc2	TRUE
Profile12	0	-1	-1	-2	-1	1284	125.367	0	0	Profile12	0	-1	-1	-2	-1	1049	183	0	0	Apol9b	TRUE
Profile12	0	-1	-1	-2	-1	1284	125.367	0	0	Profile12	0	-1	-1	-2	-1	1049	183	0	0	Csdc2	TRUE
Profile12	0	-1	-1	-2	-1	1284	125.367	0	0	Profile12	0	-1	-1	-2	-1	1049	183	0	0	2015-09-03	TRUE
Profile12	0	-1	-1	-2	-1	1284	125.367	0	0	Profile12	0	-1	-1	-2	-1	1049	183	0	0	Mpped1	TRUE
Profile12	0	-1	-1	-2	-1	1284	125.367	0	0	Profile12	0	-1	-1	-2	-1	1049	183	0	0	Panx2	TRUE
Profile12	0	-1	-1	-2	-1	1284	125.367	0	0	Profile12	0	-1	-1	-2	-1	1049	183	0	0	Mapk8ip2	TRUE
Profile12	0	-1	-1	-2	-1	1284	125.367	0	0	Profile12	0	-1	-1	-2	-1	1049	183	0	0	Pfkm	TRUE
Profile12	0	-1	-1	-2	-1	1284	125.367	0	0	Profile12	0	-1	-1	-2	-1	1049	183	0	0	Fam135b	TRUE
Profile12	0	-1	-1	-2	-1	1284	125.367	0	0	Profile12	0	-1	-1	-2	-1	1049	183	0	0	Fam135b	TRUE
Profile12	0	-1	-1	-2	-1	1284	125.367	0	0	Profile12	0	-1	-1	-2	-1	1049	183	0	0	Arc	TRUE
Profile12	0	-1	-1	-2	-1	1284	125.367	0	0	Profile12	0	-1	-1	-2	-1	1049	183	0	0	Scrt1	TRUE
Profile12	0	-1	-1	-2	-1	1284	125.367	0	0	Profile12	0	-1	-1	-2	-1	1049	183	0	0	Lrrc24	TRUE
Profile12	0	-1	-1	-2	-1	1284	125.367	0	0	Profile12	0	-1	-1	-2	-1	1049	183	0	0	Sult4a1	TRUE
Profile12	0	-1	-1	-2	-1	1284	125.367	0	0	Profile12	0	-1	-1	-2	-1	1049	183	0	0	Ldoc1l	TRUE
Profile12	0	-1	-1	-2	-1	1284	125.367	0	0	Profile12	0	-1	-1	-2	-1	1049	183	0	0	Fam116b	TRUE
Profile12	0	-1	-1	-2	-1	1284	125.367	0	0	Profile12	0	-1	-1	-2	-1	1049	183	0	0	2900011O08Rik	TRUE
Profile12	0	-1	-1	-2	-1	1284	125.367	0	0	Profile12	0	-1	-1	-2	-1	1049	183	0	0	P2rx6	TRUE
Profile12	0	-1	-1	-2	-1	1284	125.367	0	0	Profile12	0	-1	-1	-2	-1	1049	183	0	0	Tnk2	TRUE
Profile12	0	-1	-1	-2	-1	1284	125.367	0	0	Profile12	0	-1	-1	-2	-1	1049	183	0	0	Adcy5	TRUE
Profile12	0	-1	-1	-2	-1	1284	125.367	0	0	Profile12	0	-1	-1	-2	-1	1049	183	0	0	Grin2a	TRUE
Profile12	0	-1	-1	-2	-1	1284	125.367	0	0	Profile12	0	-1	-1	-2	-1	1049	183	0	0	D16H22S680E	TRUE
Profile12	0	-1	-1	-2	-1	1284	125.367	0	0	Profile12	0	-1	-1	-2	-1	1049	183	0	0	Stxbp5l	TRUE
Profile12	0	-1	-1	-2	-1	1284	125.367	0	0	Profile12	0	-1	-1	-2	-1	1049	183	0	0	9330155M09Rik	TRUE
Profile12	0	-1	-1	-2	-1	1284	125.367	0	0	Profile12	0	-1	-1	-2	-1	1049	183	0	0	Pde10a	TRUE
Profile12	0	-1	-1	-2	-1	1284	125.367	0	0	Profile12	0	-1	-1	-2	-1	1049	183	0	0	Rps6ka2	TRUE
Profile12	0	-1	-1	-2	-1	1284	125.367	0	0	Profile12	0	-1	-1	-2	-1	1049	183	0	0	Caskin1	TRUE
Profile12	0	-1	-1	-2	-1	1284	125.367	0	0	Profile12	0	-1	-1	-2	-1	1049	183	0	0	Glp1r	TRUE
Profile12	0	-1	-1	-2	-1	1284	125.367	0	0	Profile12	0	-1	-1	-2	-1	1049	183	0	0	Prrt1	TRUE
Profile12	0	-1	-1	-2	-1	1284	125.367	0	0	Profile12	0	-1	-1	-2	-1	1049	183	0	0	Gabbr1	TRUE
Profile12	0	-1	-1	-2	-1	1284	125.367	0	0	Profile12	0	-1	-1	-2	-1	1049	183	0	0	Enpp5	TRUE
Profile12	0	-1	-1	-2	-1	1284	125.367	0	0	Profile12	0	-1	-1	-2	-1	1049	183	0	0	Fsd1	TRUE
Profile12	0	-1	-1	-2	-1	1284	125.367	0	0	Profile12	0	-1	-1	-2	-1	1049	183	0	0	Dlgap1	TRUE
Profile12	0	-1	-1	-2	-1	1284	125.367	0	0	Profile12	0	-1	-1	-2	-1	1049	183	0	0	Syngr3	TRUE
Profile12	0	-1	-1	-2	-1	1284	125.367	0	0	Profile12	0	-1	-1	-2	-1	1049	183	0	0	Rhbdl1	TRUE
Profile12	0	-1	-1	-2	-1	1284	125.367	0	0	Profile12	0	-1	-1	-2	-1	1049	183	0	0	Arhgdig	TRUE
Profile12	0	-1	-1	-2	-1	1284	125.367	0	0	Profile12	0	-1	-1	-2	-1	1049	183	0	0	Grm4	TRUE
Profile12	0	-1	-1	-2	-1	1284	125.367	0	0	Profile12	0	-1	-1	-2	-1	1049	183	0	0	Tmem151b	TRUE
Profile12	0	-1	-1	-2	-1	1284	125.367	0	0	Profile12	0	-1	-1	-2	-1	1049	183	0	0	Pja2	TRUE
Profile12	0	-1	-1	-2	-1	1284	125.367	0	0	Profile12	0	-1	-1	-2	-1	1049	183	0	0	Pcdhb8	TRUE
Profile12	0	-1	-1	-2	-1	1284	125.367	0	0	Profile12	0	-1	-1	-2	-1	1049	183	0	0	Pcdhb15	TRUE
Profile12	0	-1	-1	-2	-1	1284	125.367	0	0	Profile12	0	-1	-1	-2	-1	1049	183	0	0	Arhgap26	TRUE
Profile12	0	-1	-1	-2	-1	1284	125.367	0	0	Profile12	0	-1	-1	-2	-1	1049	183	0	0	Camk2a	TRUE
Profile12	0	-1	-1	-2	-1	1284	125.367	0	0	Profile12	0	-1	-1	-2	-1	1049	183	0	0	Spink10	TRUE
Profile12	0	-1	-1	-2	-1	1284	125.367	0	0	Profile12	0	-1	-1	-2	-1	1049	183	0	0	Napg	TRUE
Profile12	0	-1	-1	-2	-1	1284	125.367	0	0	Profile12	0	-1	-1	-2	-1	1049	183	0	0	Gnal	TRUE
Profile12	0	-1	-1	-2	-1	1284	125.367	0	0	Profile12	0	-1	-1	-2	-1	1049	183	0	0	Slmo1	TRUE
Profile12	0	-1	-1	-2	-1	1284	125.367	0	0	Profile12	0	-1	-1	-2	-1	1049	183	0	0	Nol4	TRUE
Profile12	0	-1	-1	-2	-1	1284	125.367	0	0	Profile12	0	-1	-1	-2	-1	1049	183	0	0	Rprd1a	TRUE
Profile12	0	-1	-1	-2	-1	1284	125.367	0	0	Profile12	0	-1	-1	-2	-1	1049	183	0	0	Fgf1	TRUE
Profile12	0	-1	-1	-2	-1	1284	125.367	0	0	Profile12	0	-1	-1	-2	-1	1049	183	0	0	Trim36	TRUE
Profile12	0	-1	-1	-2	-1	1284	125.367	0	0	Profile12	0	-1	-1	-2	-1	1049	183	0	0	Sema6a	TRUE
Profile12	0	-1	-1	-2	-1	1284	125.367	0	0	Profile12	0	-1	-1	-2	-1	1049	183	0	0	Dcc	TRUE
Profile12	0	-1	-1	-2	-1	1284	125.367	0	0	Profile12	0	-1	-1	-2	-1	1049	183	0	0	Pitpnm1	TRUE
Profile12	0	-1	-1	-2	-1	1284	125.367	0	0	Profile12	0	-1	-1	-2	-1	1049	183	0	0	Pcx	TRUE
Profile12	0	-1	-1	-2	-1	1284	125.367	0	0	Profile12	0	-1	-1	-2	-1	1049	183	0	0	Nrxn2	TRUE
Profile12	0	-1	-1	-2	-1	1284	125.367	0	0	Profile12	0	-1	-1	-2	-1	1049	183	0	0	Apba1	TRUE
Profile12	0	-1	-1	-2	-1	1284	125.367	0	0	Profile12	0	-1	-1	-2	-1	1049	183	0	0	Vldlr	TRUE
Profile12	0	-1	-1	-2	-1	1284	125.367	0	0	Profile12	0	-1	-1	-2	-1	1049	183	0	0	Ina	TRUE
Profile12	0	-1	-1	-2	-1	1284	125.367	0	0	Profile12	0	-1	-1	-2	-1	1049	183	0	0	Sorcs3	TRUE
Profile12	0	-1	-1	-2	-1	1284	125.367	0	0	Profile12	0	-1	-1	-2	-1	1049	183	0	0	Carns1	TRUE
Profile12	0	-1	-1	-2	-1	1284	125.367	0	0	Profile12	0	-1	-1	-2	-1	1049	183	0	0	Peli3	TRUE
Profile12	0	-1	-1	-2	-1	1284	125.367	0	0	Profile12	0	-1	-1	-2	-1	1049	183	0	0	Cnih2	TRUE
Profile12	0	-1	-1	-2	-1	1284	125.367	0	0	Profile12	0	-1	-1	-2	-1	1049	183	0	0	Kcnk4	TRUE
Profile12	0	-1	-1	-2	-1	1284	125.367	0	0	Profile12	0	-1	-1	-2	-1	1049	183	0	0	Rorb	TRUE
Profile12	0	-1	-1	-2	-1	1284	125.367	0	0	Profile12	0	-1	-1	-2	-1	1049	183	0	0	Ranbp6	TRUE
Profile12	0	-1	-1	-2	-1	1284	125.367	0	0	Profile12	0	-1	-1	-2	-1	1049	183	0	0	Slit1	TRUE
Profile12	0	-1	-1	-2	-1	1284	125.367	0	0	Profile12	0	-1	-1	-2	-1	1049	183	0	0	Crtac1	TRUE
Profile12	0	-1	-1	-2	-1	1284	125.367	0	0	Profile12	0	-1	-1	-2	-1	1049	183	0	0	Lbx1	TRUE
Profile12	0	-1	-1	-2	-1	1284	125.367	0	0	Profile12	0	-1	-1	-2	-1	1049	183	0	0	Kcnip2	TRUE
Profile12	0	-1	-1	-2	-1	1284	125.367	0	0	Profile12	0	-1	-1	-2	-1	1049	183	0	0	Psd	TRUE
Profile12	0	-1	-1	-2	-1	1284	125.367	0	0	Profile12	0	-1	-1	-2	-1	1049	183	0	0	Hspa12a	TRUE
Profile12	0	-1	-1	-2	-1	1284	125.367	0	0	Profile12	0	-1	-1	-2	-1	1049	183	0	0	Bend7	TRUE
Profile12	0	-1	-1	-2	-1	1284	125.367	0	0	Profile12	0	-1	-1	-2	-1	1049	183	0	0	Cacfd1	TRUE
Profile12	0	-1	-1	-2	-1	1284	125.367	0	0	Profile12	0	-1	-1	-2	-1	1049	183	0	0	Gad1	TRUE
Profile12	0	-1	-1	-2	-1	1284	125.367	0	0	Profile12	0	-1	-1	-2	-1	1049	183	0	0	Ypel4	TRUE
Profile12	0	-1	-1	-2	-1	1284	125.367	0	0	Profile12	0	-1	-1	-2	-1	1049	183	0	0	Kcna4	TRUE
Profile12	0	-1	-1	-2	-1	1284	125.367	0	0	Profile12	0	-1	-1	-2	-1	1049	183	0	0	Tyro3	TRUE
Profile12	0	-1	-1	-2	-1	1284	125.367	0	0	Profile12	0	-1	-1	-2	-1	1049	183	0	0	Ckmt1	TRUE
Profile12	0	-1	-1	-2	-1	1284	125.367	0	0	Profile12	0	-1	-1	-2	-1	1049	183	0	0	Slc27a2	TRUE
Profile12	0	-1	-1	-2	-1	1284	125.367	0	0	Profile12	0	-1	-1	-2	-1	1049	183	0	0	Macrod2	TRUE
Profile12	0	-1	-1	-2	-1	1284	125.367	0	0	Profile12	0	-1	-1	-2	-1	1049	183	0	0	Mmp24	TRUE
Profile12	0	-1	-1	-2	-1	1284	125.367	0	0	Profile12	0	-1	-1	-2	-1	1049	183	0	0	Snhg11	TRUE
Profile12	0	-1	-1	-2	-1	1284	125.367	0	0	Profile12	0	-1	-1	-2	-1	1049	183	0	0	Phactr3	TRUE
Profile12	0	-1	-1	-2	-1	1284	125.367	0	0	Profile12	0	-1	-1	-2	-1	1049	183	0	0	Cacna1b	TRUE
Profile12	0	-1	-1	-2	-1	1284	125.367	0	0	Profile12	0	-1	-1	-2	-1	1049	183	0	0	Fam163b	TRUE
Profile12	0	-1	-1	-2	-1	1284	125.367	0	0	Profile12	0	-1	-1	-2	-1	1049	183	0	0	Garnl3	TRUE
Profile12	0	-1	-1	-2	-1	1284	125.367	0	0	Profile12	0	-1	-1	-2	-1	1049	183	0	0	Strbp	TRUE
Profile12	0	-1	-1	-2	-1	1284	125.367	0	0	Profile12	0	-1	-1	-2	-1	1049	183	0	0	Ermn	TRUE
Profile12	0	-1	-1	-2	-1	1284	125.367	0	0	Profile12	0	-1	-1	-2	-1	1049	183	0	0	Scn1a	TRUE
Profile12	0	-1	-1	-2	-1	1284	125.367	0	0	Profile12	0	-1	-1	-2	-1	1049	183	0	0	Chn1	TRUE
Profile12	0	-1	-1	-2	-1	1284	125.367	0	0	Profile12	0	-1	-1	-2	-1	1049	183	0	0	Lnp	TRUE
Profile12	0	-1	-1	-2	-1	1284	125.367	0	0	Profile12	0	-1	-1	-2	-1	1049	183	0	0	Zfp385b	TRUE
Profile12	0	-1	-1	-2	-1	1284	125.367	0	0	Profile12	0	-1	-1	-2	-1	1049	183	0	0	Tmx2	TRUE
Profile12	0	-1	-1	-2	-1	1284	125.367	0	0	Profile12	0	-1	-1	-2	-1	1049	183	0	0	Madd	TRUE
Profile12	0	-1	-1	-2	-1	1284	125.367	0	0	Profile12	0	-1	-1	-2	-1	1049	183	0	0	Ttbk2	TRUE
Profile12	0	-1	-1	-2	-1	1284	125.367	0	0	Profile12	0	-1	-1	-2	-1	1049	183	0	0	Kcnip3	TRUE
Profile12	0	-1	-1	-2	-1	1284	125.367	0	0	Profile12	0	-1	-1	-2	-1	1049	183	0	0	Ggt7	TRUE
Profile12	0	-1	-1	-2	-1	1284	125.367	0	0	Profile12	0	-1	-1	-2	-1	1049	183	0	0	Ptprt	TRUE
Profile12	0	-1	-1	-2	-1	1284	125.367	0	0	Profile12	0	-1	-1	-2	-1	1049	183	0	0	Kcnq2	TRUE
Profile12	0	-1	-1	-2	-1	1284	125.367	0	0	Profile12	0	-1	-1	-2	-1	1049	183	0	0	Eef1a2	TRUE
Profile12	0	-1	-1	-2	-1	1284	125.367	0	0	Profile12	0	-1	-1	-2	-1	1049	183	0	0	Usp13	TRUE
Profile12	0	-1	-1	-2	-1	1284	125.367	0	0	Profile12	0	-1	-1	-2	-1	1049	183	0	0	Hspa4l	TRUE
Profile12	0	-1	-1	-2	-1	1284	125.367	0	0	Profile12	0	-1	-1	-2	-1	1049	183	0	0	Mab21l1	TRUE
Profile12	0	-1	-1	-2	-1	1284	125.367	0	0	Profile12	0	-1	-1	-2	-1	1049	183	0	0	Serpini1	TRUE
Profile12	0	-1	-1	-2	-1	1284	125.367	0	0	Profile12	0	-1	-1	-2	-1	1049	183	0	0	Fstl5	TRUE
Profile12	0	-1	-1	-2	-1	1284	125.367	0	0	Profile12	0	-1	-1	-2	-1	1049	183	0	0	Sprr2e	TRUE
Profile12	0	-1	-1	-2	-1	1284	125.367	0	0	Profile12	0	-1	-1	-2	-1	1049	183	0	0	Kcnd3	TRUE
Profile12	0	-1	-1	-2	-1	1284	125.367	0	0	Profile12	0	-1	-1	-2	-1	1049	183	0	0	Amigo1	TRUE
Profile12	0	-1	-1	-2	-1	1284	125.367	0	0	Profile12	0	-1	-1	-2	-1	1049	183	0	0	Cxxc4	TRUE
Profile12	0	-1	-1	-2	-1	1284	125.367	0	0	Profile12	0	-1	-1	-2	-1	1049	183	0	0	Pfn2	TRUE
Profile12	0	-1	-1	-2	-1	1284	125.367	0	0	Profile12	0	-1	-1	-2	-1	1049	183	0	0	Gpr149	TRUE
Profile12	0	-1	-1	-2	-1	1284	125.367	0	0	Profile12	0	-1	-1	-2	-1	1049	183	0	0	Plch1	TRUE
Profile12	0	-1	-1	-2	-1	1284	125.367	0	0	Profile12	0	-1	-1	-2	-1	1049	183	0	0	Glrb	TRUE
Profile12	0	-1	-1	-2	-1	1284	125.367	0	0	Profile12	0	-1	-1	-2	-1	1049	183	0	0	Trim2	TRUE
Profile12	0	-1	-1	-2	-1	1284	125.367	0	0	Profile12	0	-1	-1	-2	-1	1049	183	0	0	Dclk2	TRUE
Profile12	0	-1	-1	-2	-1	1284	125.367	0	0	Profile12	0	-1	-1	-2	-1	1049	183	0	0	Kcnc4	TRUE
Profile12	0	-1	-1	-2	-1	1284	125.367	0	0	Profile12	0	-1	-1	-2	-1	1049	183	0	0	Gstm7	TRUE
Profile12	0	-1	-1	-2	-1	1284	125.367	0	0	Profile12	0	-1	-1	-2	-1	1049	183	0	0	Ak5	TRUE
Profile12	0	-1	-1	-2	-1	1284	125.367	0	0	Profile12	0	-1	-1	-2	-1	1049	183	0	0	Rusc1	TRUE
Profile12	0	-1	-1	-2	-1	1284	125.367	0	0	Profile12	0	-1	-1	-2	-1	1049	183	0	0	Calb1	TRUE
Profile12	0	-1	-1	-2	-1	1284	125.367	0	0	Profile12	0	-1	-1	-2	-1	1049	183	0	0	N28178	TRUE
Profile12	0	-1	-1	-2	-1	1284	125.367	0	0	Profile12	0	-1	-1	-2	-1	1049	183	0	0	Grhpr	TRUE
Profile12	0	-1	-1	-2	-1	1284	125.367	0	0	Profile12	0	-1	-1	-2	-1	1049	183	0	0	Sh3gl2	TRUE
Profile12	0	-1	-1	-2	-1	1284	125.367	0	0	Profile12	0	-1	-1	-2	-1	1049	183	0	0	Dnajc6	TRUE
Profile12	0	-1	-1	-2	-1	1284	125.367	0	0	Profile12	0	-1	-1	-2	-1	1049	183	0	0	Sgip1	TRUE
Profile12	0	-1	-1	-2	-1	1284	125.367	0	0	Profile12	0	-1	-1	-2	-1	1049	183	0	0	Slc6a9	TRUE
Profile12	0	-1	-1	-2	-1	1284	125.367	0	0	Profile12	0	-1	-1	-2	-1	1049	183	0	0	Rims3	TRUE
Profile12	0	-1	-1	-2	-1	1284	125.367	0	0	Profile12	0	-1	-1	-2	-1	1049	183	0	0	Hpcal4	TRUE
Profile12	0	-1	-1	-2	-1	1284	125.367	0	0	Profile12	0	-1	-1	-2	-1	1049	183	0	0	Oscp1	TRUE
Profile12	0	-1	-1	-2	-1	1284	125.367	0	0	Profile12	0	-1	-1	-2	-1	1049	183	0	0	Dlgap3	TRUE
Profile12	0	-1	-1	-2	-1	1284	125.367	0	0	Profile12	0	-1	-1	-2	-1	1049	183	0	0	Camk2n1	TRUE
Profile12	0	-1	-1	-2	-1	1284	125.367	0	0	Profile12	0	-1	-1	-2	-1	1049	183	0	0	Fbxo2	TRUE
Profile12	0	-1	-1	-2	-1	1284	125.367	0	0	Profile12	0	-1	-1	-2	-1	1049	183	0	0	Clstn1	TRUE
Profile12	0	-1	-1	-2	-1	1284	125.367	0	0	Profile12	0	-1	-1	-2	-1	1049	183	0	0	Tox	TRUE
Profile12	0	-1	-1	-2	-1	1284	125.367	0	0	Profile12	0	-1	-1	-2	-1	1049	183	0	0	Necab1	TRUE
Profile12	0	-1	-1	-2	-1	1284	125.367	0	0	Profile12	0	-1	-1	-2	-1	1049	183	0	0	Tmem246	TRUE
Profile12	0	-1	-1	-2	-1	1284	125.367	0	0	Profile12	0	-1	-1	-2	-1	1049	183	0	0	Elavl2	TRUE
Profile12	0	-1	-1	-2	-1	1284	125.367	0	0	Profile12	0	-1	-1	-2	-1	1049	183	0	0	Prkaa2	TRUE
Profile12	0	-1	-1	-2	-1	1284	125.367	0	0	Profile12	0	-1	-1	-2	-1	1049	183	0	0	Faah	TRUE
Profile12	0	-1	-1	-2	-1	1284	125.367	0	0	Profile12	0	-1	-1	-2	-1	1049	183	0	0	Olfr1333	TRUE
Profile12	0	-1	-1	-2	-1	1284	125.367	0	0	Profile12	0	-1	-1	-2	-1	1049	183	0	0	Rimkla	TRUE
Profile12	0	-1	-1	-2	-1	1284	125.367	0	0	Profile12	0	-1	-1	-2	-1	1049	183	0	0	Hpca	TRUE
Profile12	0	-1	-1	-2	-1	1284	125.367	0	0	Profile12	0	-1	-1	-2	-1	1049	183	0	0	Oprd1	TRUE
Profile12	0	-1	-1	-2	-1	1284	125.367	0	0	Profile12	0	-1	-1	-2	-1	1049	183	0	0	Mrto4	TRUE
Profile12	0	-1	-1	-2	-1	1284	125.367	0	0	Profile12	0	-1	-1	-2	-1	1049	183	0	0	Clcn6	TRUE
Profile12	0	-1	-1	-2	-1	1284	125.367	0	0	Profile12	0	-1	-1	-2	-1	1049	183	0	0	Fbxo44	TRUE
Profile12	0	-1	-1	-2	-1	1284	125.367	0	0	Profile12	0	-1	-1	-2	-1	1049	183	0	0	Kif1b	TRUE
Profile12	0	-1	-1	-2	-1	1284	125.367	0	0	Profile12	0	-1	-1	-2	-1	1049	183	0	0	Prkcz	TRUE
Profile12	0	-1	-1	-2	-1	1284	125.367	0	0	Profile12	0	-1	-1	-2	-1	1049	183	0	0	Pclo	TRUE
Profile12	0	-1	-1	-2	-1	1284	125.367	0	0	Profile12	0	-1	-1	-2	-1	1049	183	0	0	Dpp6	TRUE
Profile12	0	-1	-1	-2	-1	1284	125.367	0	0	Profile12	0	-1	-1	-2	-1	1049	183	0	0	Rnf32	TRUE
Profile12	0	-1	-1	-2	-1	1284	125.367	0	0	Profile12	0	-1	-1	-2	-1	1049	183	0	0	Dpysl5	TRUE
Profile12	0	-1	-1	-2	-1	1284	125.367	0	0	Profile12	0	-1	-1	-2	-1	1049	183	0	0	Mapre3	TRUE
Profile12	0	-1	-1	-2	-1	1284	125.367	0	0	Profile12	0	-1	-1	-2	-1	1049	183	0	0	Crmp1	TRUE
Profile12	0	-1	-1	-2	-1	1284	125.367	0	0	Profile12	0	-1	-1	-2	-1	1049	183	0	0	Uchl1	TRUE
Profile12	0	-1	-1	-2	-1	1284	125.367	0	0	Profile12	0	-1	-1	-2	-1	1049	183	0	0	Parm1	TRUE
Profile12	0	-1	-1	-2	-1	1284	125.367	0	0	Profile12	0	-1	-1	-2	-1	1049	183	0	0	Mvk	TRUE
Profile12	0	-1	-1	-2	-1	1284	125.367	0	0	Profile12	0	-1	-1	-2	-1	1049	183	0	0	Cit	TRUE
Profile12	0	-1	-1	-2	-1	1284	125.367	0	0	Profile12	0	-1	-1	-2	-1	1049	183	0	0	Nos1	TRUE
Profile12	0	-1	-1	-2	-1	1284	125.367	0	0	Profile12	0	-1	-1	-2	-1	1049	183	0	0	Tesc	TRUE
Profile12	0	-1	-1	-2	-1	1284	125.367	0	0	Profile12	0	-1	-1	-2	-1	1049	183	0	0	Rhbdd2	TRUE
Profile12	0	-1	-1	-2	-1	1284	125.367	0	0	Profile12	0	-1	-1	-2	-1	1049	183	0	0	Ache	TRUE
Profile12	0	-1	-1	-2	-1	1284	125.367	0	0	Profile12	0	-1	-1	-2	-1	1049	183	0	0	Actl6b	TRUE
Profile12	0	-1	-1	-2	-1	1284	125.367	0	0	Profile12	0	-1	-1	-2	-1	1049	183	0	0	Elfn1	TRUE
Profile12	0	-1	-1	-2	-1	1284	125.367	0	0	Profile12	0	-1	-1	-2	-1	1049	183	0	0	Wasf3	TRUE
Profile12	0	-1	-1	-2	-1	1284	125.367	0	0	Profile12	0	-1	-1	-2	-1	1049	183	0	0	Adam22	TRUE
Profile12	0	-1	-1	-2	-1	1284	125.367	0	0	Profile12	0	-1	-1	-2	-1	1049	183	0	0	Kcnh2	TRUE
Profile12	0	-1	-1	-2	-1	1284	125.367	0	0	Profile12	0	-1	-1	-2	-1	1049	183	0	0	Smarcd3	TRUE
Profile12	0	-1	-1	-2	-1	1284	125.367	0	0	Profile12	0	-1	-1	-2	-1	1049	183	0	0	Nsg1	TRUE
Profile12	0	-1	-1	-2	-1	1284	125.367	0	0	Profile12	0	-1	-1	-2	-1	1049	183	0	0	Gabra2	TRUE
Profile12	0	-1	-1	-2	-1	1284	125.367	0	0	Profile12	0	-1	-1	-2	-1	1049	183	0	0	Tmem150c	TRUE
